# Supplementary material for: What fuels the fire? Cooking fuel estimates at global, regional and country level for 1990-2030
Source: Research Square preprint supplement (doi:10.21203/rs.3.rs-251806/v1), 2021-02-17

# World

## Urban

## Rural

## Overall

Percentage of the population  
mainly using each fuel type

100%  
75%  
50%  
25%  
0%

1990 2000 2010 2020 2030

1990 2000 2010 2020 2030

1990 2000 2010 2020 2030

Fuel Type

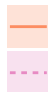

Biomass

Charcoal

Coal

Kerosene

Gas

Electricity

# World

## Urban

## Rural

## Overall

Percentage of the population  
mainly using each fuel type

100%  
75%  
50%  
25%  
0%

1990 2000 2010 2020 2030

1990 2000 2010 2020 2030

1990 2000 2010 2020 2030

Fuel Type

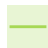

Total Clean

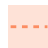

Total Polluting

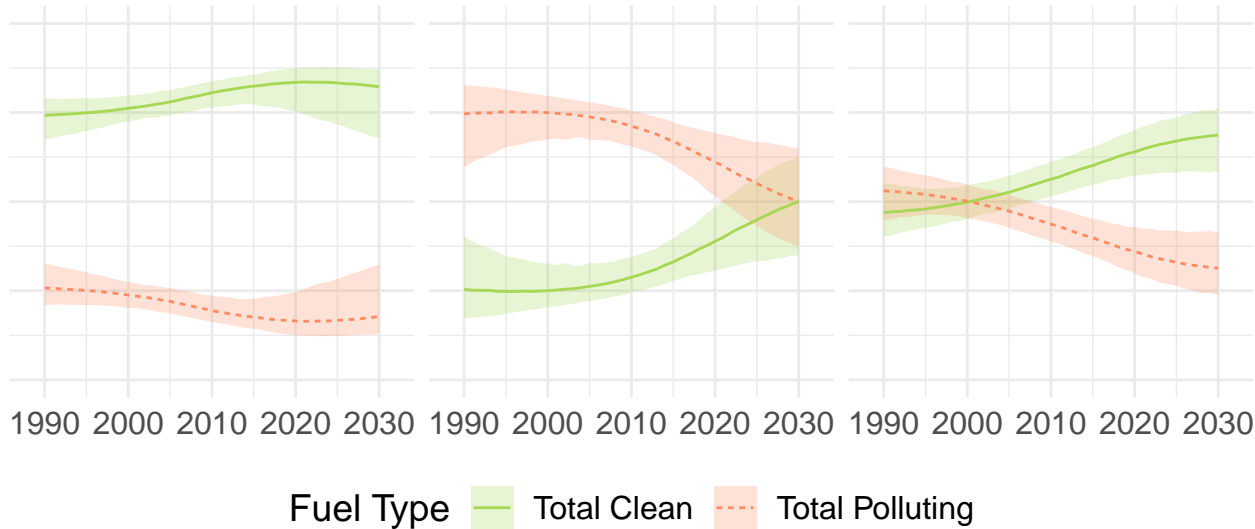

# Central Asia and Southern Asia

Percentage of the population  
mainly using each fuel type

Urban

Rural

Overall

100%  
75%  
50%  
25%  
0%

1990 2000 2010 2020 2030

1990 2000 2010 2020 2030

1990 2000 2010 2020 2030

Fuel Type

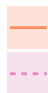

Biomass

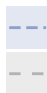

Charcoal



Coal



Kerosene

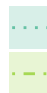

Gas



Electricity

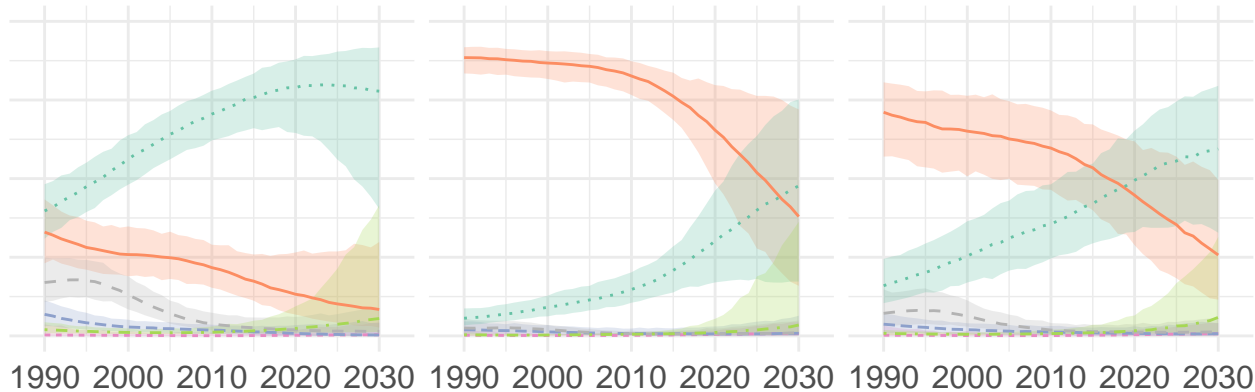

# Central Asia and Southern Asia

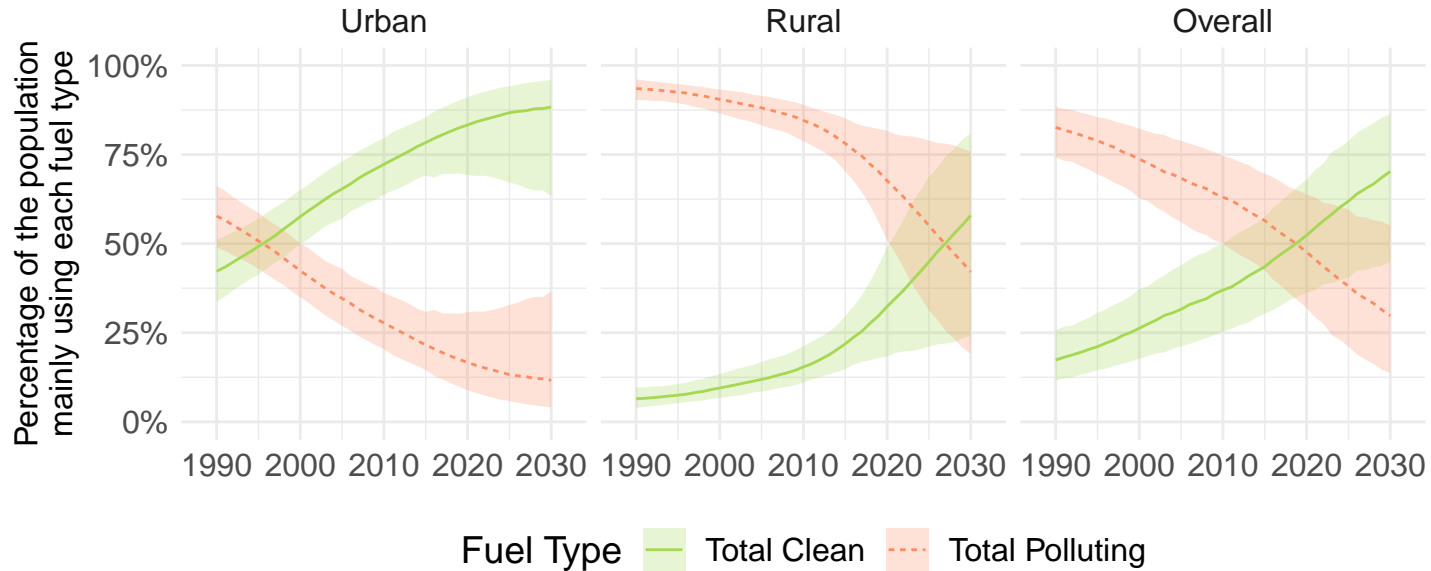

# Eastern Asia and South-eastern Asia

Percentage of the population  
mainly using each fuel type

Urban

Rural

Overall

100%  
75%  
50%  
25%  
0%

1990 2000 2010 2020 2030

1990 2000 2010 2020 2030

1990 2000 2010 2020 2030

Fuel Type

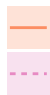

Biomass

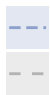

Coal

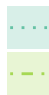

Gas

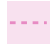

Charcoal

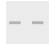

Kerosene

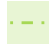

Electricity

# Eastern Asia and South-eastern Asia

## Urban

## Rural

## Overall

Percentage of the population  
mainly using each fuel type

100%  
75%  
50%  
25%  
0%

1990 2000 2010 2020 2030

1990 2000 2010 2020 2030

1990 2000 2010 2020 2030

Fuel Type

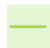

Total Clean

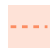

Total Polluting

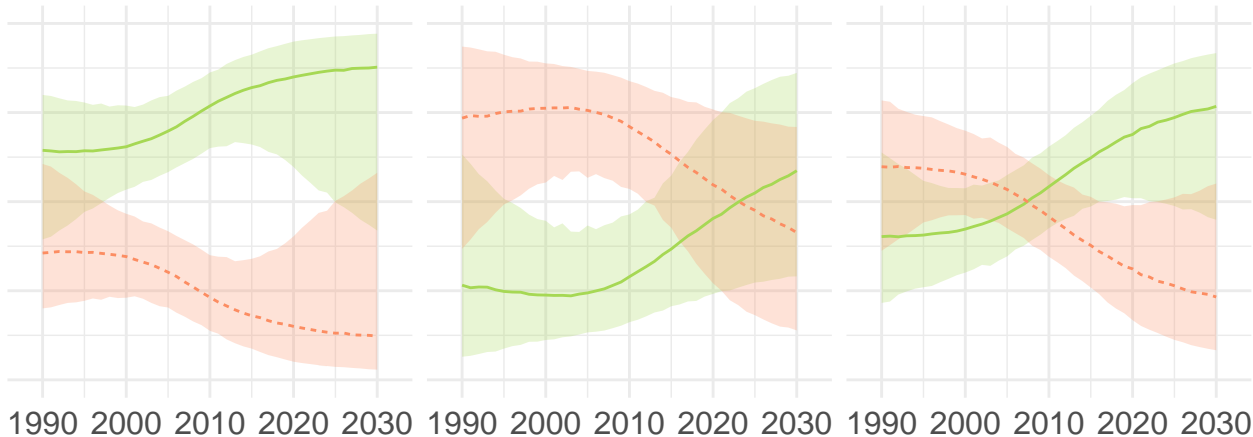

# Latin America & the Caribbean

Percentage of the population  
mainly using each fuel type

Urban

Rural

Overall

100%

75%

50%

25%

0%

1990 2000 2010 2020 2030

1990 2000 2010 2020 2030

1990 2000 2010 2020 2030

Fuel Type

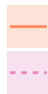

Biomass

Charcoal

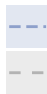

Coal

Kerosene

Gas

Electricity

# Latin America & the Caribbean

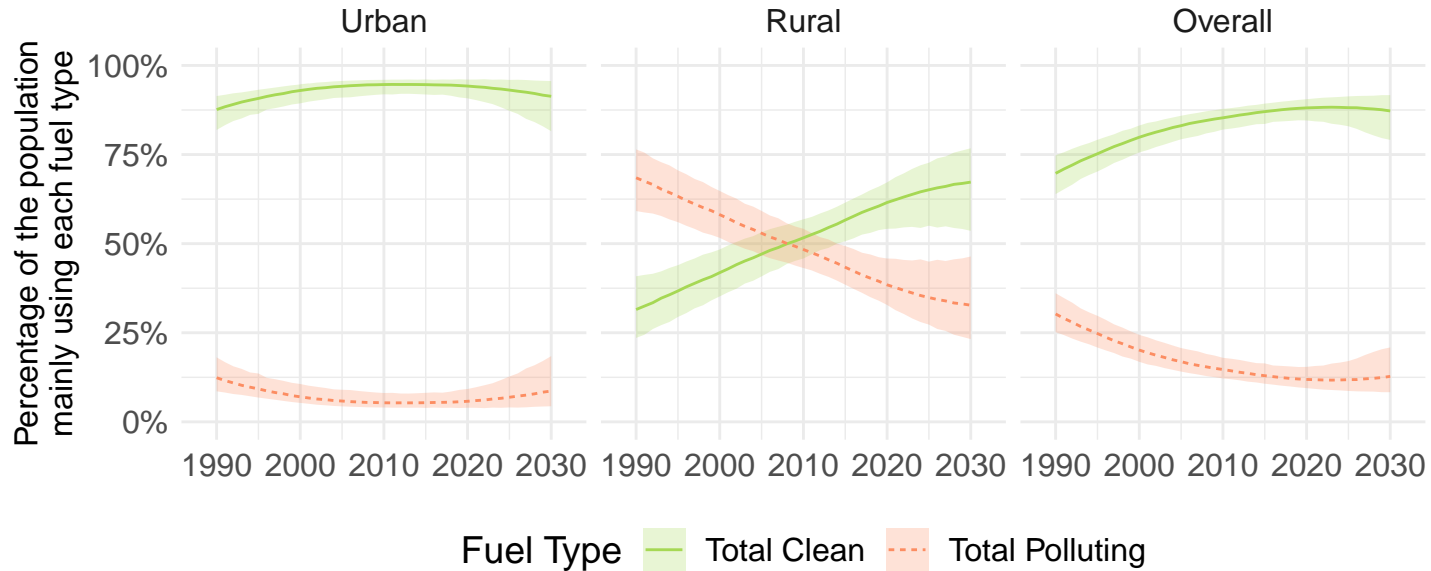



# Northern America and Europe

Percentage of the population  
mainly using each fuel type

Urban

Rural

Overall

100%

75%

50%

25%

0%

1990 2000 2010 2020 2030

1990 2000 2010 2020 2030

1990 2000 2010 2020 2030

Fuel Type

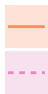

Biomass

Charcoal

Coal

Kerosene

Gas

Electricity

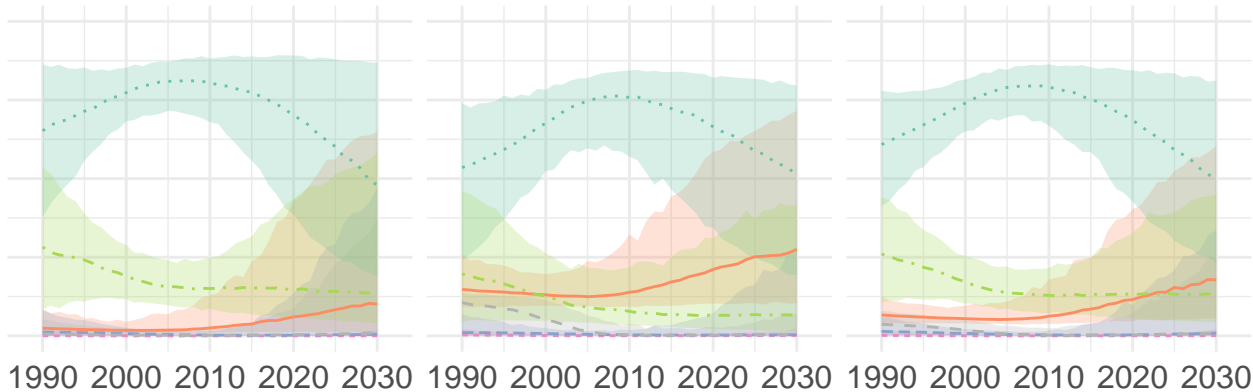

# Northern America and Europe

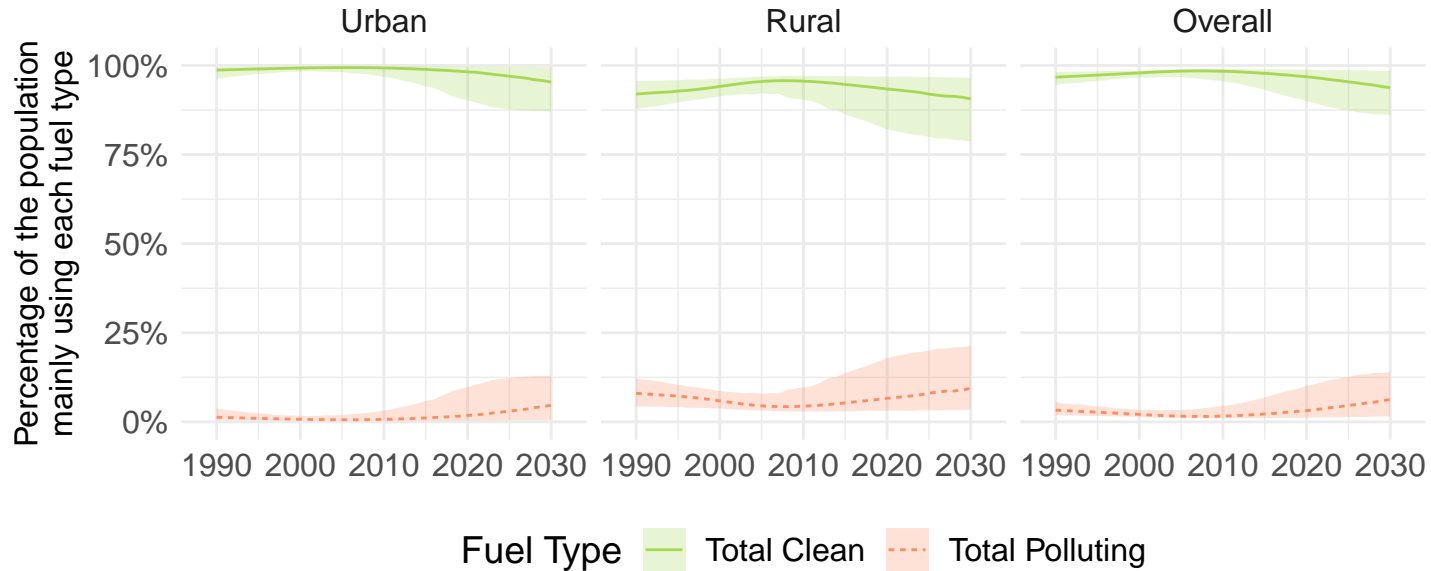

# Oceania excluding Australia and New Zealand

Percentage of the population  
mainly using each fuel type

Urban

Rural

Overall

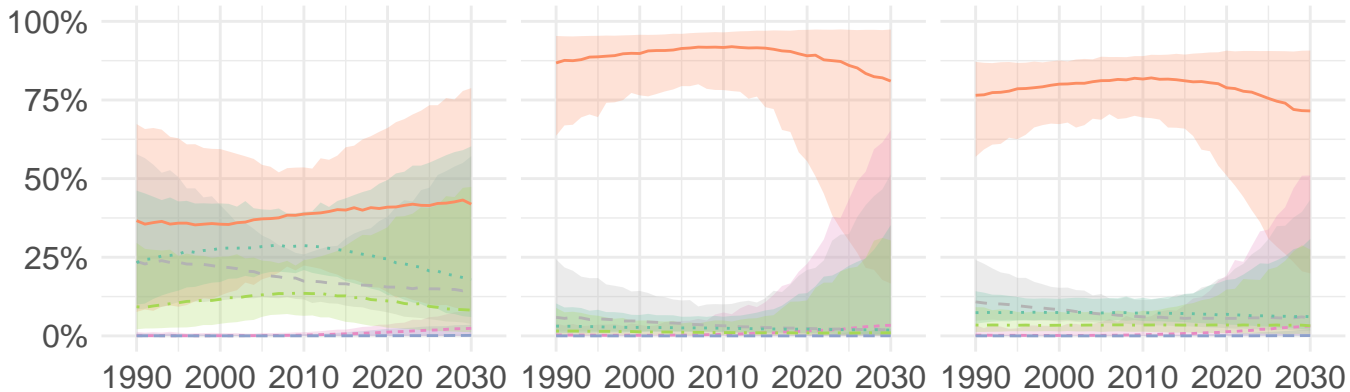

Fuel Type



Biomass



Charcoal



Coal



Kerosene



Gas



Electricity

# Oceania excluding Australia and New Zealand

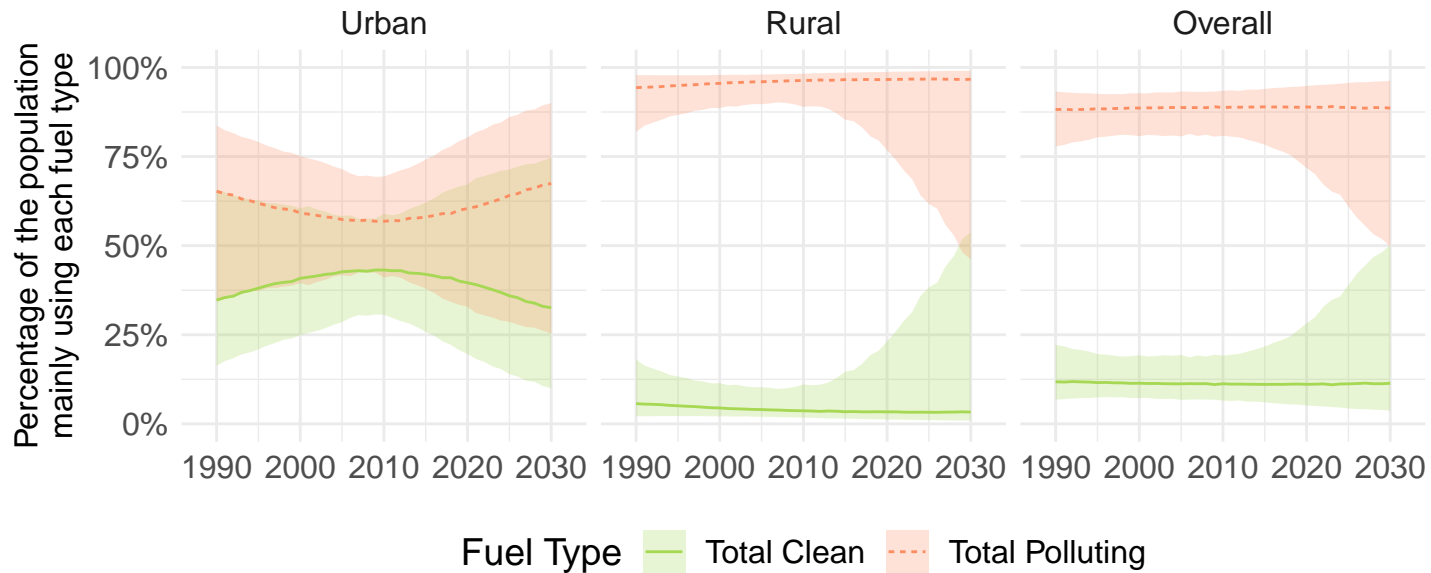

# Sub-Saharan Africa

## Urban

## Rural

## Overall

Percentage of the population  
mainly using each fuel type

100%  
75%  
50%  
25%  
0%

1990 2000 2010 2020 2030

1990 2000 2010 2020 2030

1990 2000 2010 2020 2030

Fuel Type



Biomass



Charcoal



Coal



Kerosene

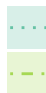

Gas



Electricity

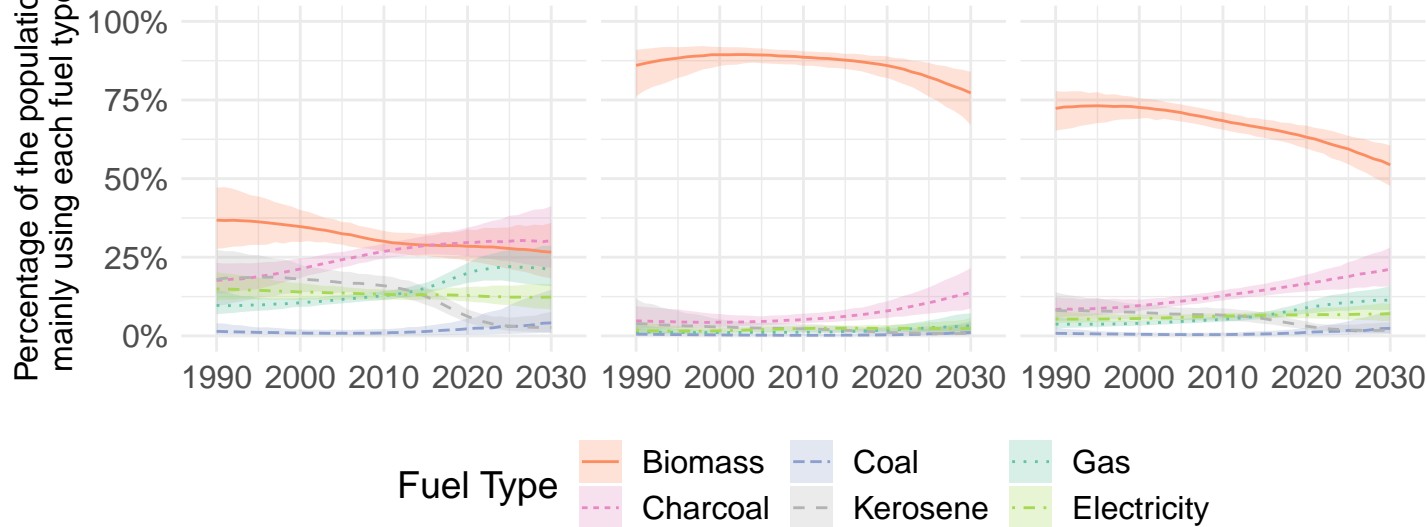

# Sub-Saharan Africa

## Urban

## Rural

## Overall

Percentage of the population  
mainly using each fuel type

100%  
75%  
50%  
25%  
0%

1990 2000 2010 2020 2030 1990 2000 2010 2020 2030 1990 2000 2010 2020 2030

Fuel Type

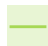

Total Clean

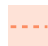

Total Polluting

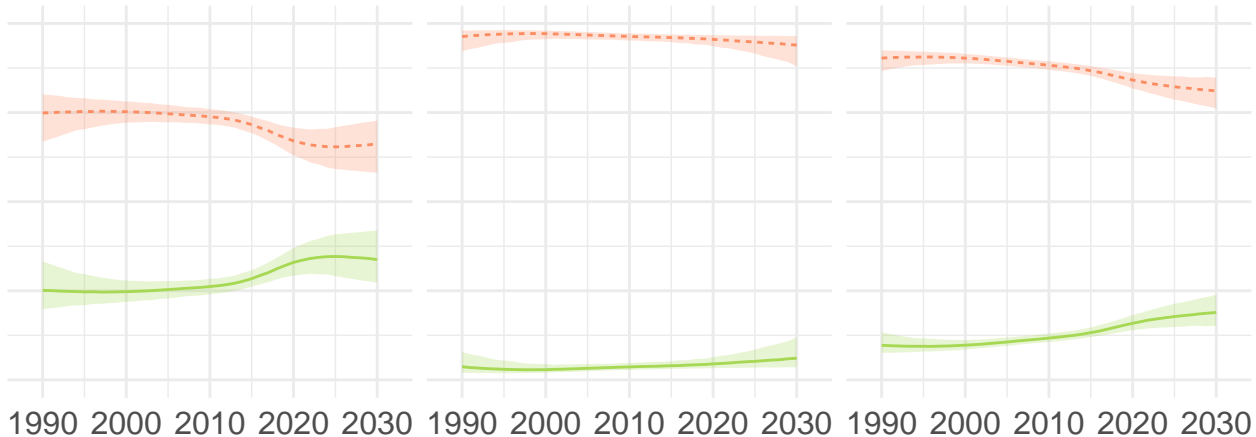

# Western Asia and Northern Africa

Percentage of the population  
mainly using each fuel type

Urban

Rural

Overall

100%  
75%  
50%  
25%  
0%

1990 2000 2010 2020 2030

1990 2000 2010 2020 2030

1990 2000 2010 2020 2030

Fuel Type



Biomass

Charcoal

Coal

Kerosene

Gas

Electricity

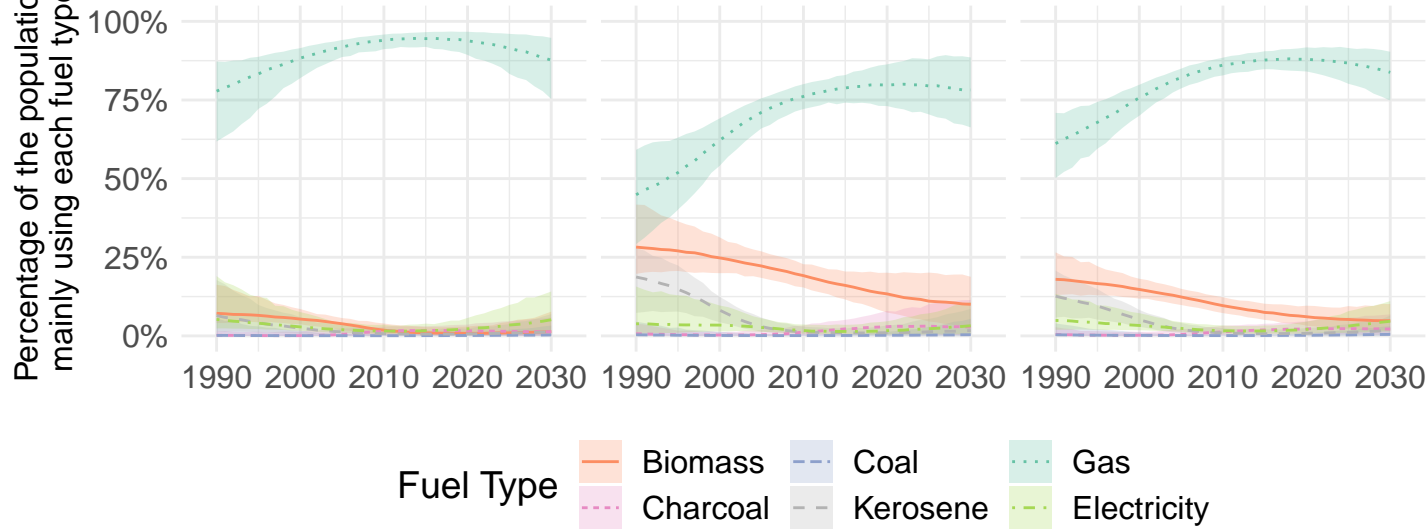

# Western Asia and Northern Africa

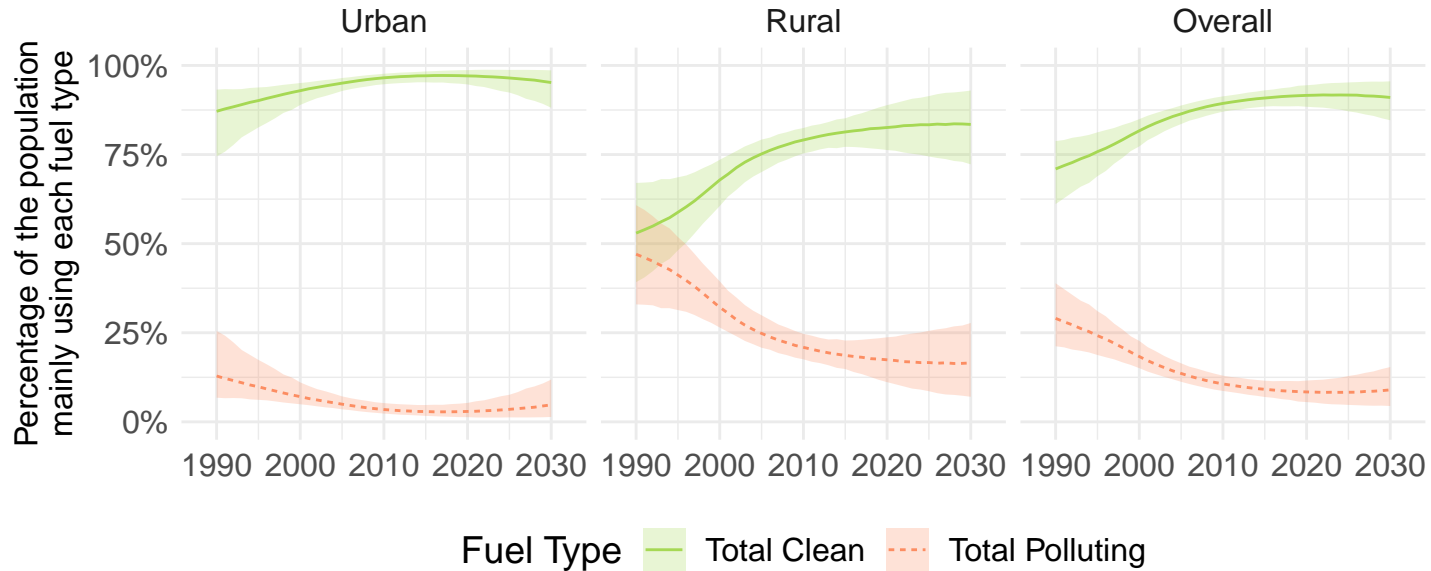

Supplement: Supplementary file 1 [file 7adfc44751cb59c011264f61.pdf]
