# Supplementary material for: What fuels the fire? Cooking fuel estimates at global, regional and country level for 1990-2030
Source: Research Square preprint supplement (doi:10.21203/rs.3.rs-251806/v1), 2021-02-17

# African Region

## Urban

## Rural

## Overall

Percentage of the population  
mainly using each fuel type

100%  
75%  
50%  
25%  
0%

1990 2000 2010 2020 2030

1990 2000 2010 2020 2030

1990 2000 2010 2020 2030

Fuel Type

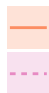

Biomass

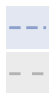

Charcoal



Coal



Kerosene

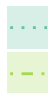

Gas



Electricity

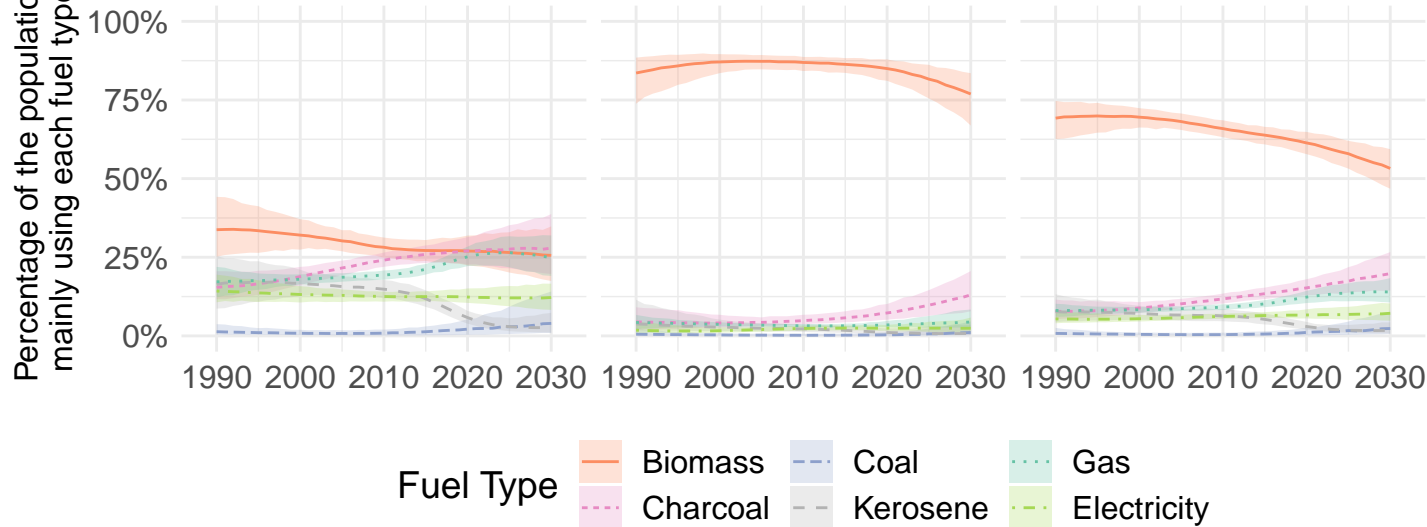

# African Region

## Urban

## Rural

## Overall

Percentage of the population  
mainly using each fuel type

100%  
75%  
50%  
25%  
0%

1990 2000 2010 2020 2030

1990 2000 2010 2020 2030

1990 2000 2010 2020 2030

Fuel Type

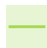

Total Clean

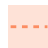

Total Polluting

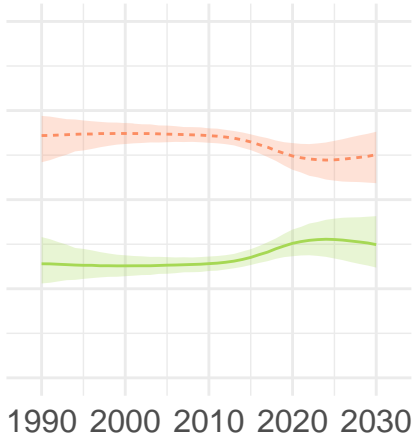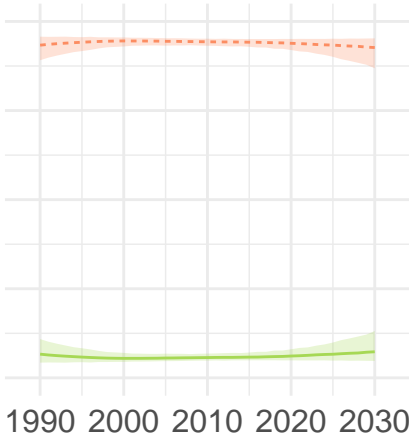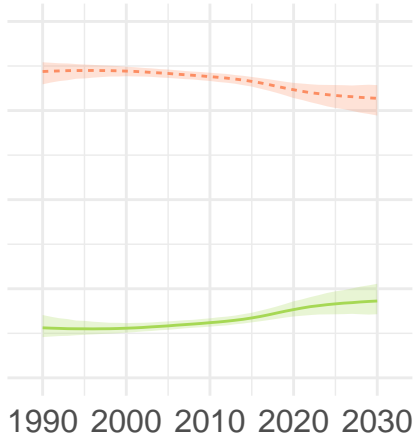

# Region of the Americas

Percentage of the population  
mainly using each fuel type

Urban

Rural

Overall

100%  
75%  
50%  
25%  
0%

1990 2000 2010 2020 2030

1990 2000 2010 2020 2030

1990 2000 2010 2020 2030

Fuel Type

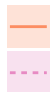

Biomass

Charcoal

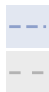

Coal

Kerosene

Gas

Electricity

# Region of the Americas

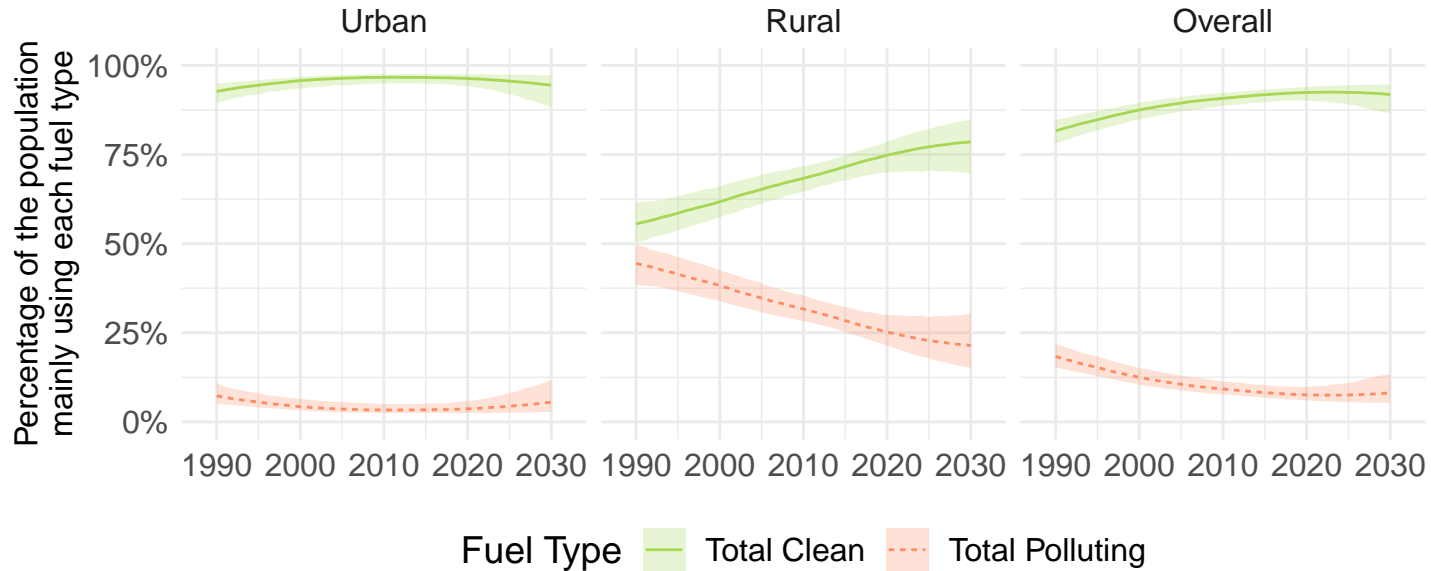

# South-East Asia Region

Percentage of the population  
mainly using each fuel type

Urban

Rural

Overall

100%  
75%  
50%  
25%  
0%

1990 2000 2010 2020 2030

1990 2000 2010 2020 2030

1990 2000 2010 2020 2030

Fuel Type



Biomass



Coal



Gas

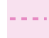

Charcoal

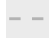

Kerosene

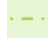

Electricity

# South-East Asia Region

## Urban

## Rural

## Overall

Percentage of the population  
mainly using each fuel type

100%  
75%  
50%  
25%  
0%

1990 2000 2010 2020 2030

1990 2000 2010 2020 2030

1990 2000 2010 2020 2030

Fuel Type

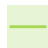

Total Clean



Total Polluting

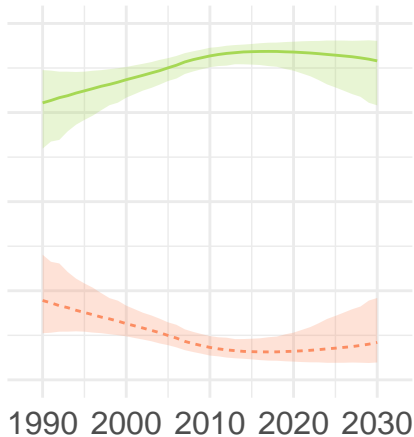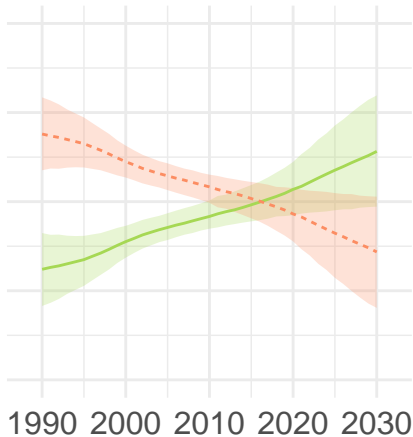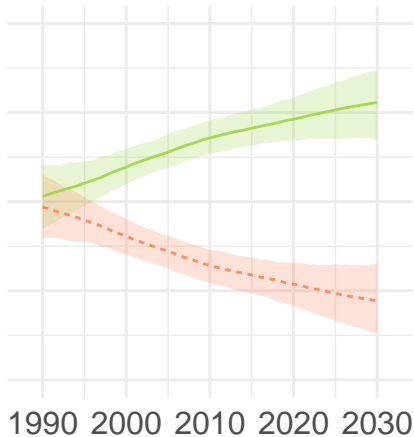

# European Region

## Urban

## Rural

## Overall

Percentage of the population  
mainly using each fuel type

100%  
75%  
50%  
25%  
0%

1990 2000 2010 2020 2030

1990 2000 2010 2020 2030

1990 2000 2010 2020 2030

Fuel Type



Biomass

Charcoal

Coal

Kerosene

Gas

Electricity

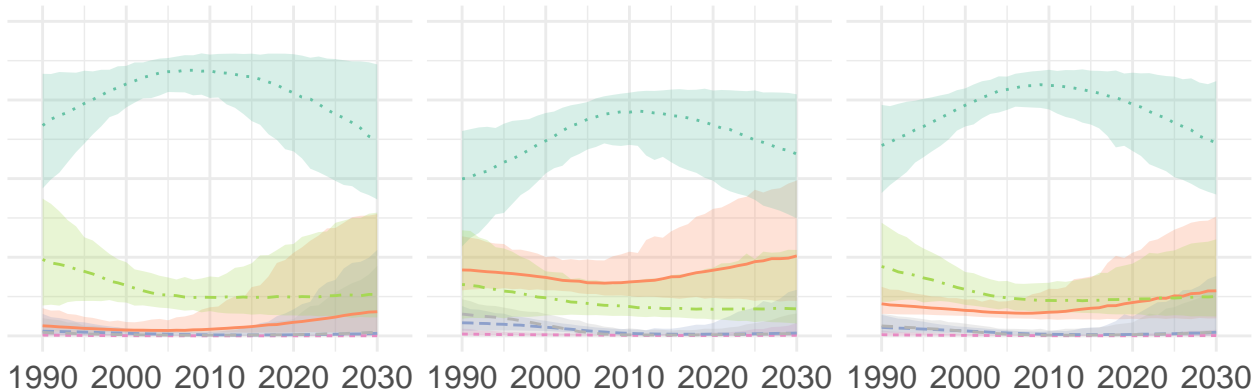

# European Region

## Urban

## Rural

## Overall

Percentage of the population  
mainly using each fuel type

100%  
75%  
50%  
25%  
0%

1990 2000 2010 2020 2030

1990 2000 2010 2020 2030

1990 2000 2010 2020 2030

Fuel Type

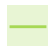

Total Clean

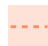

Total Polluting

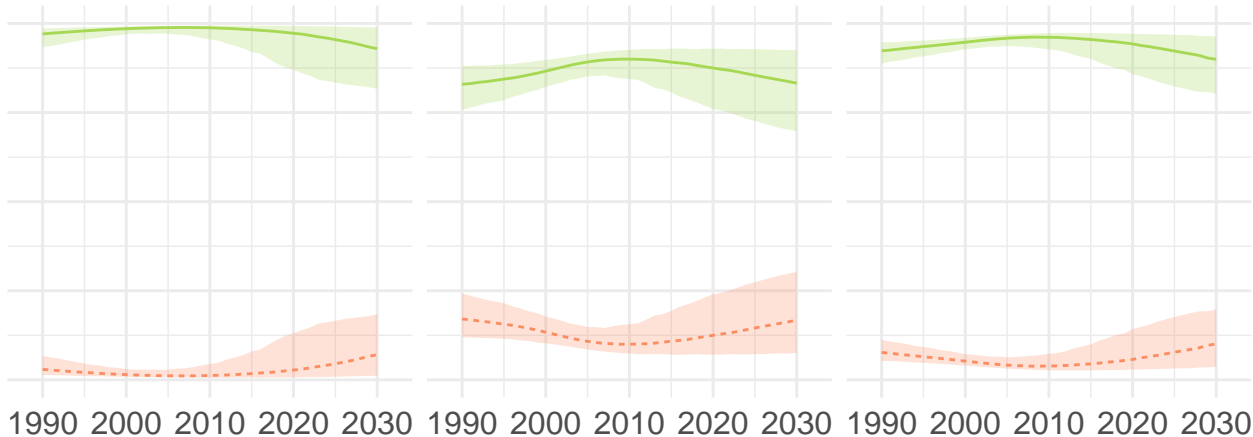



# Eastern Mediterranean Region

Percentage of the population  
mainly using each fuel type

Urban

Rural

Overall

100%  
75%  
50%  
25%  
0%

1990 2000 2010 2020 2030

1990 2000 2010 2020 2030

1990 2000 2010 2020 2030

Fuel Type

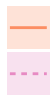

Biomass

Charcoal

Coal

Kerosene

Gas

Electricity

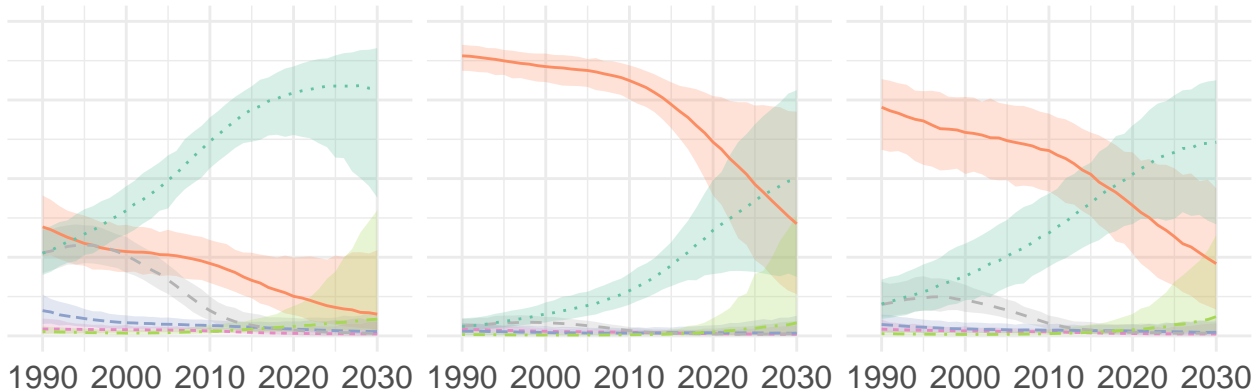

# Eastern Mediterranean Region

## Urban

## Rural

## Overall

Percentage of the population mainly using each fuel type

100%  
75%  
50%  
25%  
0%

1990 2000 2010 2020 2030

1990 2000 2010 2020 2030

1990 2000 2010 2020 2030

Fuel Type



Total Clean



Total Polluting

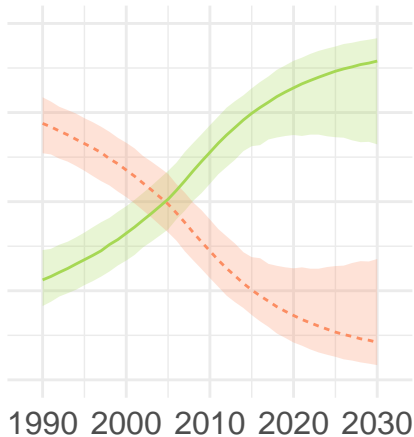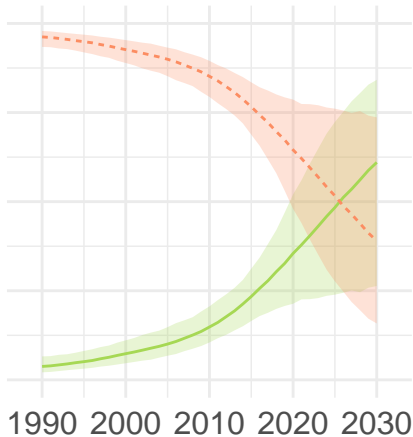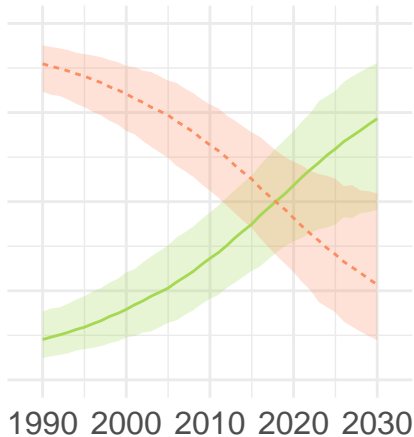

# Western Pacific Region

Percentage of the population  
mainly using each fuel type

Urban

Rural

Overall

100%  
75%  
50%  
25%  
0%

1990 2000 2010 2020 2030

1990 2000 2010 2020 2030

1990 2000 2010 2020 2030

Fuel Type

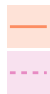

Biomass

Charcoal

Coal

Kerosene

Gas

Electricity

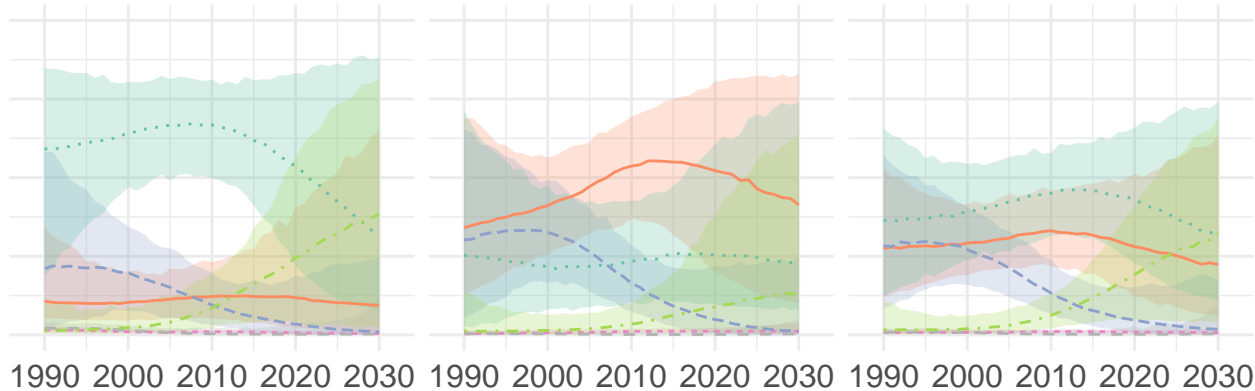

# Western Pacific Region

## Urban

## Rural

## Overall

Percentage of the population  
mainly using each fuel type

100%  
75%  
50%  
25%  
0%

1990 2000 2010 2020 2030

1990 2000 2010 2020 2030

1990 2000 2010 2020 2030

Fuel Type



Total Clean



Total Polluting

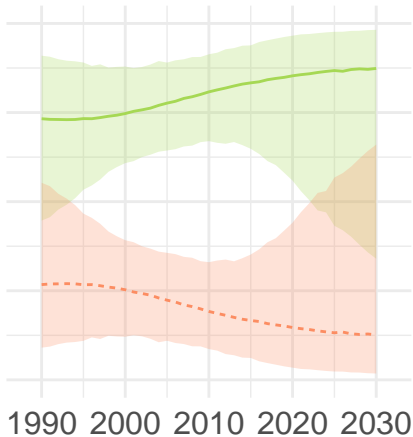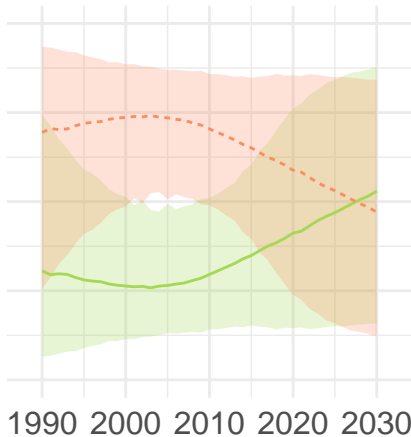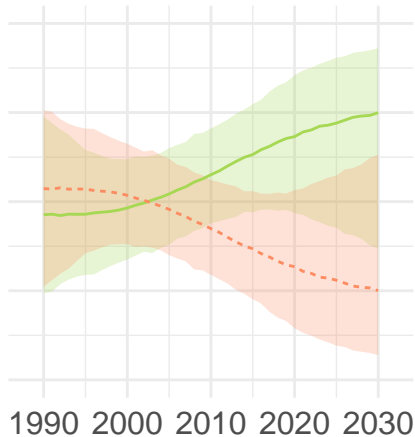

Supplement: Supplementary file 2 [file d4fa823f946c75a5e5d42b48.pdf]
