# Supplementary material for: What fuels the fire? Cooking fuel estimates at global, regional and country level for 1990-2030
Source: Research Square preprint supplement (doi:10.21203/rs.3.rs-251806/v1), 2021-02-17
Supplement: Supplementary file 1 [file 1406d923c0499c95648d2fd1.xlsx]

## Sheet: Readme
	Estimates of fuel use in each country from "What fuels the fire? Cooking fuel estimates at global, regional and country level for 1990-2030".
	Oliver Stoner, Jessica Lewis, Itzel Lucio Martínez, Sophie Gumy, Theo Economou and Heather Adair-Rohani
	Contact: householdenergy@who.int
	Copyright WHO 2021 under CC BY 3.0 IGO
	Estimates are provided for 128 low- and middle-income countries plus 2 countries (Cook Islands, Niue) with no World Bank income classification (2019 fiscal year).
	No estimates are provided for 4 low- and middle-income countries with no data currently suitable for modelling (Bulgaria, Cuba, Lebanon, Libya).
	Percent
	Percentage of the population mainly using each fuel type for cooking.
	Population
	Number of people mainly using each fuel type for cooking.
	Estimate Types
	Median: Central estimates of fuel use (50% quantiles of posterior predictive distributions).
	Lower95 and Upper95: Lower and upper bounds, respectively, of 95% credible/confidence intervals (2.5% and 97.5% quantiles of posterior predictive distributions).
	Aggregate Categories
	Biomass (unprocessed/raw biomass) includes wood, crop residues, and dung.
	Gas (gaseous fuels) includes liquid petroleum gas (LPG), natural gas, and biogas.
	Total Polluting includes unprocessed biomass, charcoal, coal, and kerosene.
	Total Clean includes gaseous fuels, electricity, and other clean fuels (e.g. alcohol, solar).
	Data Sources
	Household Surveys: World Health Organization Household Energy Database (March 2020 version)
	Statistical Model: https://rss.onlinelibrary.wiley.com/doi/full/10.1111/rssc.12428
	Population Estimates: United Nations World Urbanization Prospects - Population Division (2018 revision)
	Income Classification: World Bank Income Country and Lending Groups - Country Classification (2019 fiscal year)

## Sheet: Percent
iso3	country	region	area	fuel	year	percent_lower95	percent_median	percent_upper95
AFG	Afghanistan	Central Asia and Southern Asia	Urban	Kerosene	1990	0	0.001475	0.169352
ALB	Albania	Northern America and Europe	Urban	Kerosene	1990	0	0.00071	0.134743
DZA	Algeria	Western Asia and Northern Africa	Urban	Kerosene	1990	0	0.0002	0.0930695
AGO	Angola	Sub-Saharan Africa	Urban	Kerosene	1990	0	6e-05	0.0377115
ARG	Argentina	Latin America & the Caribbean	Urban	Kerosene	1990	0	0.00133	0.0674412
ARM	Armenia	Western Asia and Northern Africa	Urban	Kerosene	1990	0	0.023965	0.359685
AZE	Azerbaijan	Western Asia and Northern Africa	Urban	Kerosene	1990	0	0.05977	0.450338
BGD	Bangladesh	Central Asia and Southern Asia	Urban	Kerosene	1990	0.0050585	0.02778	0.0816773
BLR	Belarus	Northern America and Europe	Urban	Kerosene	1990	0	6e-05	0.10257
BLZ	Belize	Latin America & the Caribbean	Urban	Kerosene	1990	0.0156678	0.0821	0.184394
BEN	Benin	Sub-Saharan Africa	Urban	Kerosene	1990	0.0306205	0.165715	0.406482
BTN	Bhutan	Central Asia and Southern Asia	Urban	Kerosene	1990	9.975e-05	0.214895	0.811343
BOL	Bolivia (Plurinational State of)	Latin America & the Caribbean	Urban	Kerosene	1990	0.0147192	0.05769	0.135651
BIH	Bosnia and Herzegovina	Northern America and Europe	Urban	Kerosene	1990	0	1e-05	0.036638
BWA	Botswana	Sub-Saharan Africa	Urban	Kerosene	1990	0.0222772	0.158895	0.385027
BRA	Brazil	Latin America & the Caribbean	Urban	Kerosene	1990	0	0.00013	0.0360485
BFA	Burkina Faso	Sub-Saharan Africa	Urban	Kerosene	1990	1e-05	0.01581	0.148366
BDI	Burundi	Sub-Saharan Africa	Urban	Kerosene	1990	0	0	0.0146003
CPV	Cabo Verde	Sub-Saharan Africa	Urban	Kerosene	1990	0	0	0.0290627
KHM	Cambodia	Eastern Asia and South-eastern Asia	Urban	Kerosene	1990	7e-05	0.01863	0.135747
CMR	Cameroon	Sub-Saharan Africa	Urban	Kerosene	1990	0.0112985	0.111015	0.39317
CAF	Central African Republic	Sub-Saharan Africa	Urban	Kerosene	1990	0	0.00049	0.0947532
TCD	Chad	Sub-Saharan Africa	Urban	Kerosene	1990	0	0.00338	0.112883
CHN	China	Eastern Asia and South-eastern Asia	Urban	Kerosene	1990	0	0	0.0194828
COL	Colombia	Latin America & the Caribbean	Urban	Kerosene	1990	0.061956	0.119775	0.191962
COM	Comoros	Sub-Saharan Africa	Urban	Kerosene	1990	0.00774825	0.18812	0.714024
COG	Congo	Sub-Saharan Africa	Urban	Kerosene	1990	0.00022975	0.03919	0.372869
COK	Cook Islands	Oceania excluding Australia and New Zealand	Urban	Kerosene	1990	0	0.01047	0.398002
CRI	Costa Rica	Latin America & the Caribbean	Urban	Kerosene	1990	0	0	0.0269845
CIV	Côte d'Ivoire	Sub-Saharan Africa	Urban	Kerosene	1990	0	0.00015	0.0515045
PRK	Democratic Peoples Republic of Korea	Eastern Asia and South-eastern Asia	Urban	Kerosene	1990	0	0.038255	0.578702
COD	Democratic Republic of the Congo	Sub-Saharan Africa	Urban	Kerosene	1990	0	0.00012	0.0326725
DJI	Djibouti	Sub-Saharan Africa	Urban	Kerosene	1990	0.727703	0.92265	0.991671
DMA	Dominica	Latin America & the Caribbean	Urban	Kerosene	1990	0	0.00027	0.126988
DOM	Dominican Republic	Latin America & the Caribbean	Urban	Kerosene	1990	0	3e-05	0.0240283
ECU	Ecuador	Latin America & the Caribbean	Urban	Kerosene	1990	0	0.00558	0.141013
EGY	Egypt	Western Asia and Northern Africa	Urban	Kerosene	1990	0.00078	0.08305	0.505446
SLV	El Salvador	Latin America & the Caribbean	Urban	Kerosene	1990	0	0.007565	0.154804
GNQ	Equatorial Guinea	Sub-Saharan Africa	Urban	Kerosene	1990	0.0066995	0.42163	0.969328
ERI	Eritrea	Sub-Saharan Africa	Urban	Kerosene	1990	0.324603	0.63767	0.889579
ETH	Ethiopia	Sub-Saharan Africa	Urban	Kerosene	1990	0.0661758	0.252945	0.53758
FJI	Fiji	Oceania excluding Australia and New Zealand	Urban	Kerosene	1990	0.0323565	0.299925	0.691582
GAB	Gabon	Sub-Saharan Africa	Urban	Kerosene	1990	0	0.010335	0.280792
GMB	Gambia	Sub-Saharan Africa	Urban	Kerosene	1990	0	6e-05	0.00741025
GEO	Georgia	Western Asia and Northern Africa	Urban	Kerosene	1990	0	0.00269	0.157322
GHA	Ghana	Sub-Saharan Africa	Urban	Kerosene	1990	0.0161573	0.046155	0.0952428
GRD	Grenada	Latin America & the Caribbean	Urban	Kerosene	1990	0	0.0298	0.432279
GTM	Guatemala	Latin America & the Caribbean	Urban	Kerosene	1990	0	0	0.024251
GIN	Guinea	Sub-Saharan Africa	Urban	Kerosene	1990	0	0.009	0.119506
GNB	Guinea-Bissau	Sub-Saharan Africa	Urban	Kerosene	1990	0	0	0.004961
GUY	Guyana	Latin America & the Caribbean	Urban	Kerosene	1990	0.119736	0.51664	0.87955
HTI	Haiti	Latin America & the Caribbean	Urban	Kerosene	1990	0.00347975	0.084845	0.421717
HND	Honduras	Latin America & the Caribbean	Urban	Kerosene	1990	0.0324248	0.28162	0.7136
IND	India	Central Asia and Southern Asia	Urban	Kerosene	1990	0.144959	0.23178	0.339913
IDN	Indonesia	Eastern Asia and South-eastern Asia	Urban	Kerosene	1990	0.477193	0.654025	0.801661
IRN	Iran (Islamic Republic of)	Central Asia and Southern Asia	Urban	Kerosene	1990	0	0.02168	0.567764
IRQ	Iraq	Western Asia and Northern Africa	Urban	Kerosene	1990	0.00016	0.16842	0.850637
JAM	Jamaica	Latin America & the Caribbean	Urban	Kerosene	1990	0	0.03645	0.441126
JOR	Jordan	Western Asia and Northern Africa	Urban	Kerosene	1990	0	0.00081	0.0626603
KAZ	Kazakhstan	Central Asia and Southern Asia	Urban	Kerosene	1990	0	0.000695	0.0660773
KEN	Kenya	Sub-Saharan Africa	Urban	Kerosene	1990	0.292474	0.688345	0.947858
KIR	Kiribati	Oceania excluding Australia and New Zealand	Urban	Kerosene	1990	0.0048195	0.389155	0.953746
KGZ	Kyrgyzstan	Central Asia and Southern Asia	Urban	Kerosene	1990	0	0.00015	0.0853895
LAO	Lao People's Democratic Republic	Eastern Asia and South-eastern Asia	Urban	Kerosene	1990	0	0	0.0056415
LSO	Lesotho	Sub-Saharan Africa	Urban	Kerosene	1990	0.239551	0.60576	0.866597
LBR	Liberia	Sub-Saharan Africa	Urban	Kerosene	1990	0	0.009165	0.367321
MDG	Madagascar	Sub-Saharan Africa	Urban	Kerosene	1990	0	0.00093	0.0206715
MWI	Malawi	Sub-Saharan Africa	Urban	Kerosene	1990	0.0015175	0.051995	0.261176
MYS	Malaysia	Eastern Asia and South-eastern Asia	Urban	Kerosene	1990	0	0.00199	0.165452
MDV	Maldives	Central Asia and Southern Asia	Urban	Kerosene	1990	0	0.02346	0.938754
MLI	Mali	Sub-Saharan Africa	Urban	Kerosene	1990	0	0.007875	0.122274
MHL	Marshall Islands	Oceania excluding Australia and New Zealand	Urban	Kerosene	1990	0.140568	0.81088	0.99726
MRT	Mauritania	Sub-Saharan Africa	Urban	Kerosene	1990	0	4e-05	0.009642
MEX	Mexico	Latin America & the Caribbean	Urban	Kerosene	1990	0	0.00011	0.0458387
FSM	Micronesia, Federated States of	Oceania excluding Australia and New Zealand	Urban	Kerosene	1990	0	0.898295	1
MNG	Mongolia	Eastern Asia and South-eastern Asia	Urban	Kerosene	1990	0	2e-05	0.0265972
MNE	Montenegro	Northern America and Europe	Urban	Kerosene	1990	0	0.00016	0.0936385
MAR	Morocco	Western Asia and Northern Africa	Urban	Kerosene	1990	0	0.00013	0.0667517
MOZ	Mozambique	Sub-Saharan Africa	Urban	Kerosene	1990	0	0.00047	0.0628815
MMR	Myanmar	Eastern Asia and South-eastern Asia	Urban	Kerosene	1990	0	3e-05	0.0256602
NAM	Namibia	Sub-Saharan Africa	Urban	Kerosene	1990	0	0.00556	0.112483
NPL	Nepal	Central Asia and Southern Asia	Urban	Kerosene	1990	0.0148387	0.29624	0.815215
NIC	Nicaragua	Latin America & the Caribbean	Urban	Kerosene	1990	0.00039	0.034515	0.138707
NER	Niger	Sub-Saharan Africa	Urban	Kerosene	1990	6e-05	0.01698	0.13004
NGA	Nigeria	Sub-Saharan Africa	Urban	Kerosene	1990	0.0776658	0.42678	0.853796
NIU	Niue	Oceania excluding Australia and New Zealand	Urban	Kerosene	1990	0	0.079855	0.803455
PAK	Pakistan	Central Asia and Southern Asia	Urban	Kerosene	1990	0	0.01144	0.350469
PNG	Papua New Guinea	Oceania excluding Australia and New Zealand	Urban	Kerosene	1990	2e-05	0.16704	0.773601
PRY	Paraguay	Latin America & the Caribbean	Urban	Kerosene	1990	0	0.00032	0.0278785
PER	Peru	Latin America & the Caribbean	Urban	Kerosene	1990	0.233667	0.56562	0.846651
PHL	Philippines	Eastern Asia and South-eastern Asia	Urban	Kerosene	1990	0.101189	0.19326	0.316197
MDA	Moldova, Republic of	Northern America and Europe	Urban	Kerosene	1990	0	0.002265	0.15229
RUS	Russian Federation	Northern America and Europe	Urban	Kerosene	1990	0	2e-05	0.0242613
RWA	Rwanda	Sub-Saharan Africa	Urban	Kerosene	1990	0	0.00289	0.0816222
LCA	Saint Lucia	Latin America & the Caribbean	Urban	Kerosene	1990	0	0.00026	0.106375
VCT	Saint Vincent and the Grenadines	Latin America & the Caribbean	Urban	Kerosene	1990	0	0.00152	0.11065
WSM	Samoa	Oceania excluding Australia and New Zealand	Urban	Kerosene	1990	0.0014795	0.260845	0.859447
STP	Sao Tome And Principe	Sub-Saharan Africa	Urban	Kerosene	1990	0.0002695	0.14187	0.773282
SEN	Senegal	Sub-Saharan Africa	Urban	Kerosene	1990	0	0	0.0110612
SRB	Serbia	Northern America and Europe	Urban	Kerosene	1990	0	0.000405	0.163565
SLE	Sierra Leone	Sub-Saharan Africa	Urban	Kerosene	1990	0	0.044535	0.651214
SLB	Solomon Islands	Oceania excluding Australia and New Zealand	Urban	Kerosene	1990	0	0	0.082597
SOM	Somalia	Sub-Saharan Africa	Urban	Kerosene	1990	0	0.002885	0.128971
ZAF	South Africa	Sub-Saharan Africa	Urban	Kerosene	1990	0.0623377	0.216205	0.439791
SSD	South Sudan	Sub-Saharan Africa	Urban	Kerosene	1990	0	1e-05	0.106398
LKA	Sri Lanka	Central Asia and Southern Asia	Urban	Kerosene	1990	0.00065	0.06217	0.434314
SDN	Sudan	Western Asia and Northern Africa	Urban	Kerosene	1990	0	5e-05	0.00870325
SUR	Suriname	Latin America & the Caribbean	Urban	Kerosene	1990	0	0.00789	0.304384
SWZ	Eswatini	Sub-Saharan Africa	Urban	Kerosene	1990	0.0620325	0.184365	0.377745
SYR	Syrian Arab Republic	Western Asia and Northern Africa	Urban	Kerosene	1990	0	0.0016	0.199175
TJK	Tajikistan	Central Asia and Southern Asia	Urban	Kerosene	1990	0	9e-05	0.070424
THA	Thailand	Eastern Asia and South-eastern Asia	Urban	Kerosene	1990	0	0.00053	0.0412145
MKD	North Macedonia	Northern America and Europe	Urban	Kerosene	1990	0	1e-05	0.146287
TLS	Timor-Leste	Eastern Asia and South-eastern Asia	Urban	Kerosene	1990	0	0.046445	0.582665
TGO	Togo	Sub-Saharan Africa	Urban	Kerosene	1990	0	0.009375	0.17623
TON	Tonga	Oceania excluding Australia and New Zealand	Urban	Kerosene	1990	0	0.026175	0.501036
TUN	Tunisia	Western Asia and Northern Africa	Urban	Kerosene	1990	0	0.03386	0.552042
TUR	Turkey	Western Asia and Northern Africa	Urban	Kerosene	1990	0	0.0021	0.337508
TKM	Turkmenistan	Central Asia and Southern Asia	Urban	Kerosene	1990	0	4e-05	0.0474485
TUV	Tuvalu	Oceania excluding Australia and New Zealand	Urban	Kerosene	1990	0	0.41414	0.996213
UGA	Uganda	Sub-Saharan Africa	Urban	Kerosene	1990	0.00019	0.01626	0.117925
UKR	Ukraine	Northern America and Europe	Urban	Kerosene	1990	0	0.00061	0.0718682
TZA	Tanzania, United Republic of	Sub-Saharan Africa	Urban	Kerosene	1990	0	0	0.0038915
UZB	Uzbekistan	Central Asia and Southern Asia	Urban	Kerosene	1990	0	0	0.0400595
VUT	Vanuatu	Oceania excluding Australia and New Zealand	Urban	Kerosene	1990	0	0.00609	0.421919
VEN	Venezuela (Bolivarian Republic of)	Latin America & the Caribbean	Urban	Kerosene	1990	0	0.00574	0.179015
VNM	Viet Nam	Eastern Asia and South-eastern Asia	Urban	Kerosene	1990	0.0196787	0.08559	0.215161
YEM	Yemen	Western Asia and Northern Africa	Urban	Kerosene	1990	0	0.038655	0.587429
ZMB	Zambia	Sub-Saharan Africa	Urban	Kerosene	1990	0	0.00338	0.0533312
ZWE	Zimbabwe	Sub-Saharan Africa	Urban	Kerosene	1990	0	0.007085	0.454441
AFG	Afghanistan	Central Asia and Southern Asia	Urban	Gas	1990	0.00107	0.139965	0.804303
ALB	Albania	Northern America and Europe	Urban	Gas	1990	0.0089575	0.235905	0.803522
DZA	Algeria	Western Asia and Northern Africa	Urban	Gas	1990	0.433082	0.943905	0.999741
AGO	Angola	Sub-Saharan Africa	Urban	Gas	1990	0.540336	0.82338	0.970752
ARG	Argentina	Latin America & the Caribbean	Urban	Gas	1990	0.814013	0.952925	0.997752
ARM	Armenia	Western Asia and Northern Africa	Urban	Gas	1990	0.0042985	0.076605	0.42062
AZE	Azerbaijan	Western Asia and Northern Africa	Urban	Gas	1990	0.271747	0.646015	0.915333
BGD	Bangladesh	Central Asia and Southern Asia	Urban	Gas	1990	0.0978875	0.24996	0.466252
BLR	Belarus	Northern America and Europe	Urban	Gas	1990	0.1648	0.78284	0.989361
BLZ	Belize	Latin America & the Caribbean	Urban	Gas	1990	0.710186	0.845705	0.938005
BEN	Benin	Sub-Saharan Africa	Urban	Gas	1990	0	0.00063	0.0360352
BTN	Bhutan	Central Asia and Southern Asia	Urban	Gas	1990	0.109971	0.64976	0.962262
BOL	Bolivia (Plurinational State of)	Latin America & the Caribbean	Urban	Gas	1990	0.719752	0.826135	0.910121
BIH	Bosnia and Herzegovina	Northern America and Europe	Urban	Gas	1990	0.0026795	0.136695	0.704686
BWA	Botswana	Sub-Saharan Africa	Urban	Gas	1990	0.170067	0.49093	0.770294
BRA	Brazil	Latin America & the Caribbean	Urban	Gas	1990	0.75875	0.902775	0.98429
BFA	Burkina Faso	Sub-Saharan Africa	Urban	Gas	1990	0.00833975	0.078465	0.314279
BDI	Burundi	Sub-Saharan Africa	Urban	Gas	1990	0	0.00043	0.117117
CPV	Cabo Verde	Sub-Saharan Africa	Urban	Gas	1990	0.662089	0.92684	0.995741
KHM	Cambodia	Eastern Asia and South-eastern Asia	Urban	Gas	1990	0.0022395	0.0397	0.18687
CMR	Cameroon	Sub-Saharan Africa	Urban	Gas	1990	0.00991825	0.08896	0.362524
CAF	Central African Republic	Sub-Saharan Africa	Urban	Gas	1990	0	0.00129	0.106283
TCD	Chad	Sub-Saharan Africa	Urban	Gas	1990	0	0.02287	0.386287
CHN	China	Eastern Asia and South-eastern Asia	Urban	Gas	1990	0.178889	0.641475	0.943883
COL	Colombia	Latin America & the Caribbean	Urban	Gas	1990	0.283367	0.372165	0.467551
COM	Comoros	Sub-Saharan Africa	Urban	Gas	1990	0	0.00053	0.0333835
COG	Congo	Sub-Saharan Africa	Urban	Gas	1990	0.00045	0.039015	0.358548
COK	Cook Islands	Oceania excluding Australia and New Zealand	Urban	Gas	1990	0.230639	0.842355	0.99897
CRI	Costa Rica	Latin America & the Caribbean	Urban	Gas	1990	0.0785832	0.34492	0.717172
CIV	Côte d'Ivoire	Sub-Saharan Africa	Urban	Gas	1990	0.0488273	0.50488	0.921355
PRK	Democratic Peoples Republic of Korea	Eastern Asia and South-eastern Asia	Urban	Gas	1990	0	0.005365	0.247134
COD	Democratic Republic of the Congo	Sub-Saharan Africa	Urban	Gas	1990	0	0.00017	0.0622308
DJI	Djibouti	Sub-Saharan Africa	Urban	Gas	1990	4.975e-05	0.00472	0.0398742
DMA	Dominica	Latin America & the Caribbean	Urban	Gas	1990	0.235211	0.9509	0.99999
DOM	Dominican Republic	Latin America & the Caribbean	Urban	Gas	1990	0.654387	0.78106	0.894695
ECU	Ecuador	Latin America & the Caribbean	Urban	Gas	1990	0.695455	0.935805	0.99691
EGY	Egypt	Western Asia and Northern Africa	Urban	Gas	1990	0.43705	0.856465	0.985802
SLV	El Salvador	Latin America & the Caribbean	Urban	Gas	1990	0.123294	0.5115	0.896524
GNQ	Equatorial Guinea	Sub-Saharan Africa	Urban	Gas	1990	0.00015975	0.18531	0.851154
ERI	Eritrea	Sub-Saharan Africa	Urban	Gas	1990	0.00150975	0.02986	0.135508
ETH	Ethiopia	Sub-Saharan Africa	Urban	Gas	1990	0	0.00409	0.0634428
FJI	Fiji	Oceania excluding Australia and New Zealand	Urban	Gas	1990	0.103683	0.46288	0.809948
GAB	Gabon	Sub-Saharan Africa	Urban	Gas	1990	0.236195	0.67324	0.949079
GMB	Gambia	Sub-Saharan Africa	Urban	Gas	1990	0	0.026355	0.164096
GEO	Georgia	Western Asia and Northern Africa	Urban	Gas	1990	0.0224628	0.299675	0.813511
GHA	Ghana	Sub-Saharan Africa	Urban	Gas	1990	0.017998	0.04999	0.101637
GRD	Grenada	Latin America & the Caribbean	Urban	Gas	1990	0.401959	0.883805	0.99626
GTM	Guatemala	Latin America & the Caribbean	Urban	Gas	1990	0.239008	0.655245	0.931187
GIN	Guinea	Sub-Saharan Africa	Urban	Gas	1990	0	0.006425	0.0834815
GNB	Guinea-Bissau	Sub-Saharan Africa	Urban	Gas	1990	0.0003095	0.0654	0.315424
GUY	Guyana	Latin America & the Caribbean	Urban	Gas	1990	0.0593995	0.32619	0.724683
HTI	Haiti	Latin America & the Caribbean	Urban	Gas	1990	0.00072	0.038075	0.286338
HND	Honduras	Latin America & the Caribbean	Urban	Gas	1990	0.0174055	0.168575	0.527933
IND	India	Central Asia and Southern Asia	Urban	Gas	1990	0.186471	0.29089	0.41067
IDN	Indonesia	Eastern Asia and South-eastern Asia	Urban	Gas	1990	0.015466	0.07863	0.202169
IRN	Iran (Islamic Republic of)	Central Asia and Southern Asia	Urban	Gas	1990	0.351423	0.92784	0.99972
IRQ	Iraq	Western Asia and Northern Africa	Urban	Gas	1990	0.106888	0.750175	0.989211
JAM	Jamaica	Latin America & the Caribbean	Urban	Gas	1990	0.446589	0.89635	0.99878
JOR	Jordan	Western Asia and Northern Africa	Urban	Gas	1990	0.871707	0.99188	1
KAZ	Kazakhstan	Central Asia and Southern Asia	Urban	Gas	1990	0.224777	0.675975	0.956111
KEN	Kenya	Sub-Saharan Africa	Urban	Gas	1990	0	0.00044	0.062281
KIR	Kiribati	Oceania excluding Australia and New Zealand	Urban	Gas	1990	0	0.04023	0.608702
KGZ	Kyrgyzstan	Central Asia and Southern Asia	Urban	Gas	1990	0.063968	0.55903	0.948789
LAO	Lao People's Democratic Republic	Eastern Asia and South-eastern Asia	Urban	Gas	1990	0	0	0.0137403
LSO	Lesotho	Sub-Saharan Africa	Urban	Gas	1990	0.0304997	0.17098	0.471784
LBR	Liberia	Sub-Saharan Africa	Urban	Gas	1990	0	0.004745	0.239969
MDG	Madagascar	Sub-Saharan Africa	Urban	Gas	1990	0.00082975	0.01262	0.0538305
MWI	Malawi	Sub-Saharan Africa	Urban	Gas	1990	0	0.00026	0.0110625
MYS	Malaysia	Eastern Asia and South-eastern Asia	Urban	Gas	1990	0.599467	0.958775	0.99973
MDV	Maldives	Central Asia and Southern Asia	Urban	Gas	1990	0.049638	0.950715	0.99998
MLI	Mali	Sub-Saharan Africa	Urban	Gas	1990	0	0.01104	0.130399
MHL	Marshall Islands	Oceania excluding Australia and New Zealand	Urban	Gas	1990	0	0.004995	0.228503
MRT	Mauritania	Sub-Saharan Africa	Urban	Gas	1990	0.07577	0.25094	0.546334
MEX	Mexico	Latin America & the Caribbean	Urban	Gas	1990	0.890004	0.984175	0.99932
FSM	Micronesia, Federated States of	Oceania excluding Australia and New Zealand	Urban	Gas	1990	0	0.01399	0.219912
MNG	Mongolia	Eastern Asia and South-eastern Asia	Urban	Gas	1990	0	4e-05	0.0154503
MNE	Montenegro	Northern America and Europe	Urban	Gas	1990	0	0.01176	0.31302
MAR	Morocco	Western Asia and Northern Africa	Urban	Gas	1990	0.764358	0.97805	0.99992
MOZ	Mozambique	Sub-Saharan Africa	Urban	Gas	1990	3e-05	0.029625	0.349434
MMR	Myanmar	Eastern Asia and South-eastern Asia	Urban	Gas	1990	0	0.000575	0.0627168
NAM	Namibia	Sub-Saharan Africa	Urban	Gas	1990	2e-05	0.107395	0.581294
NPL	Nepal	Central Asia and Southern Asia	Urban	Gas	1990	0.00022975	0.01693	0.174706
NIC	Nicaragua	Latin America & the Caribbean	Urban	Gas	1990	0.157547	0.293225	0.47927
NER	Niger	Sub-Saharan Africa	Urban	Gas	1990	0.0007595	0.024075	0.12243
NGA	Nigeria	Sub-Saharan Africa	Urban	Gas	1990	0.00112	0.040895	0.302754
NIU	Niue	Oceania excluding Australia and New Zealand	Urban	Gas	1990	1e-05	0.501305	0.997721
PAK	Pakistan	Central Asia and Southern Asia	Urban	Gas	1990	0.183401	0.539005	0.856779
PNG	Papua New Guinea	Oceania excluding Australia and New Zealand	Urban	Gas	1990	0.00054975	0.09527	0.47477
PRY	Paraguay	Latin America & the Caribbean	Urban	Gas	1990	0.567248	0.71561	0.848177
PER	Peru	Latin America & the Caribbean	Urban	Gas	1990	0.094756	0.32758	0.666698
PHL	Philippines	Eastern Asia and South-eastern Asia	Urban	Gas	1990	0.184563	0.313245	0.462789
MDA	Moldova, Republic of	Northern America and Europe	Urban	Gas	1990	0.289349	0.7554	0.964121
RUS	Russian Federation	Northern America and Europe	Urban	Gas	1990	0.188523	0.617745	0.932041
RWA	Rwanda	Sub-Saharan Africa	Urban	Gas	1990	0	0.00501	0.123041
LCA	Saint Lucia	Latin America & the Caribbean	Urban	Gas	1990	0.032939	0.44696	0.993216
VCT	Saint Vincent and the Grenadines	Latin America & the Caribbean	Urban	Gas	1990	0.658435	0.945235	0.99987
WSM	Samoa	Oceania excluding Australia and New Zealand	Urban	Gas	1990	0.00146	0.10895	0.651854
STP	Sao Tome And Principe	Sub-Saharan Africa	Urban	Gas	1990	0	0.00157	0.190388
SEN	Senegal	Sub-Saharan Africa	Urban	Gas	1990	0.164381	0.338695	0.565343
SRB	Serbia	Northern America and Europe	Urban	Gas	1990	0.00054975	0.104525	0.641841
SLE	Sierra Leone	Sub-Saharan Africa	Urban	Gas	1990	0	0	0.176335
SLB	Solomon Islands	Oceania excluding Australia and New Zealand	Urban	Gas	1990	0.0167285	0.36784	0.915927
SOM	Somalia	Sub-Saharan Africa	Urban	Gas	1990	0	1e-05	0.015464
ZAF	South Africa	Sub-Saharan Africa	Urban	Gas	1990	0.00346975	0.03558	0.107955
SSD	South Sudan	Sub-Saharan Africa	Urban	Gas	1990	0	0.01014	0.679136
LKA	Sri Lanka	Central Asia and Southern Asia	Urban	Gas	1990	0.0674965	0.47296	0.885485
SDN	Sudan	Western Asia and Northern Africa	Urban	Gas	1990	0.00296925	0.08798	0.481263
SUR	Suriname	Latin America & the Caribbean	Urban	Gas	1990	0.192763	0.787105	0.987794
SWZ	Eswatini	Sub-Saharan Africa	Urban	Gas	1990	0.0288585	0.09841	0.245102
SYR	Syrian Arab Republic	Western Asia and Northern Africa	Urban	Gas	1990	0.418937	0.938845	0.999641
TJK	Tajikistan	Central Asia and Southern Asia	Urban	Gas	1990	0.071542	0.3742	0.797416
THA	Thailand	Eastern Asia and South-eastern Asia	Urban	Gas	1990	0.586508	0.76356	0.906017
MKD	North Macedonia	Northern America and Europe	Urban	Gas	1990	0	0.021595	0.565537
TLS	Timor-Leste	Eastern Asia and South-eastern Asia	Urban	Gas	1990	0	0.00803	0.305324
TGO	Togo	Sub-Saharan Africa	Urban	Gas	1990	0	0.00148	0.061691
TON	Tonga	Oceania excluding Australia and New Zealand	Urban	Gas	1990	0.116544	0.691605	0.976794
TUN	Tunisia	Western Asia and Northern Africa	Urban	Gas	1990	0.354697	0.89854	0.998031
TUR	Turkey	Western Asia and Northern Africa	Urban	Gas	1990	0.220995	0.894025	0.997842
TKM	Turkmenistan	Central Asia and Southern Asia	Urban	Gas	1990	0.807078	0.9879	1
TUV	Tuvalu	Oceania excluding Australia and New Zealand	Urban	Gas	1990	0	0.115965	0.972504
UGA	Uganda	Sub-Saharan Africa	Urban	Gas	1990	0	0.00092	0.0770783
UKR	Ukraine	Northern America and Europe	Urban	Gas	1990	0.397795	0.86839	0.989532
TZA	Tanzania, United Republic of	Sub-Saharan Africa	Urban	Gas	1990	0	0	0.00247025
UZB	Uzbekistan	Central Asia and Southern Asia	Urban	Gas	1990	0.44633	0.916905	0.998931
VUT	Vanuatu	Oceania excluding Australia and New Zealand	Urban	Gas	1990	0.0313952	0.468325	0.923019
VEN	Venezuela (Bolivarian Republic of)	Latin America & the Caribbean	Urban	Gas	1990	0.592874	0.93208	0.99851
VNM	Viet Nam	Eastern Asia and South-eastern Asia	Urban	Gas	1990	0	0.00313	0.038832
YEM	Yemen	Western Asia and Northern Africa	Urban	Gas	1990	0.209225	0.82312	0.992421
ZMB	Zambia	Sub-Saharan Africa	Urban	Gas	1990	0	7e-05	0.0110907
ZWE	Zimbabwe	Sub-Saharan Africa	Urban	Gas	1990	0	0.002305	0.0993017
AFG	Afghanistan	Central Asia and Southern Asia	Urban	Electricity	1990	0.00017	0.108955	0.723608
ALB	Albania	Northern America and Europe	Urban	Electricity	1990	0.00334	0.158175	0.707635
DZA	Algeria	Western Asia and Northern Africa	Urban	Electricity	1990	0	0.010835	0.380696
AGO	Angola	Sub-Saharan Africa	Urban	Electricity	1990	0	0.004485	0.0643113
ARG	Argentina	Latin America & the Caribbean	Urban	Electricity	1990	0	0.00044	0.044458
ARM	Armenia	Western Asia and Northern Africa	Urban	Electricity	1990	0.165464	0.64772	0.933612
AZE	Azerbaijan	Western Asia and Northern Africa	Urban	Electricity	1990	0.0139992	0.14866	0.47343
BGD	Bangladesh	Central Asia and Southern Asia	Urban	Electricity	1990	0.00503875	0.05198	0.166404
BLR	Belarus	Northern America and Europe	Urban	Electricity	1990	0.0006095	0.137765	0.762476
BLZ	Belize	Latin America & the Caribbean	Urban	Electricity	1990	3e-05	0.011095	0.0658548
BEN	Benin	Sub-Saharan Africa	Urban	Electricity	1990	0	0	0.00207
BTN	Bhutan	Central Asia and Southern Asia	Urban	Electricity	1990	0	0.00535	0.154772
BOL	Bolivia (Plurinational State of)	Latin America & the Caribbean	Urban	Electricity	1990	0.0046395	0.02278	0.0601508
BIH	Bosnia and Herzegovina	Northern America and Europe	Urban	Electricity	1990	0.08896	0.605195	0.941194
BWA	Botswana	Sub-Saharan Africa	Urban	Electricity	1990	0.0072955	0.065925	0.199018
BRA	Brazil	Latin America & the Caribbean	Urban	Electricity	1990	0	0.002285	0.041988
BFA	Burkina Faso	Sub-Saharan Africa	Urban	Electricity	1990	0	0.00127	0.0351103
BDI	Burundi	Sub-Saharan Africa	Urban	Electricity	1990	0	0.000455	0.134935
CPV	Cabo Verde	Sub-Saharan Africa	Urban	Electricity	1990	0	0	0.00534075
KHM	Cambodia	Eastern Asia and South-eastern Asia	Urban	Electricity	1990	0	0.00032	0.0085715
CMR	Cameroon	Sub-Saharan Africa	Urban	Electricity	1990	0	0.0002	0.0211803
CAF	Central African Republic	Sub-Saharan Africa	Urban	Electricity	1990	0	0.014685	0.414915
TCD	Chad	Sub-Saharan Africa	Urban	Electricity	1990	0	0.01692	0.287106
CHN	China	Eastern Asia and South-eastern Asia	Urban	Electricity	1990	0	0.00738	0.126452
COL	Colombia	Latin America & the Caribbean	Urban	Electricity	1990	0.32544	0.421605	0.517114
COM	Comoros	Sub-Saharan Africa	Urban	Electricity	1990	0	0	0.0006205
COG	Congo	Sub-Saharan Africa	Urban	Electricity	1990	0.00084975	0.059995	0.479733
COK	Cook Islands	Oceania excluding Australia and New Zealand	Urban	Electricity	1990	0	0.037075	0.566964
CRI	Costa Rica	Latin America & the Caribbean	Urban	Electricity	1990	0.226068	0.58959	0.882915
CIV	Côte d'Ivoire	Sub-Saharan Africa	Urban	Electricity	1990	0	0.001805	0.109027
PRK	Democratic Peoples Republic of Korea	Eastern Asia and South-eastern Asia	Urban	Electricity	1990	0	0.00169	0.153151
COD	Democratic Republic of the Congo	Sub-Saharan Africa	Urban	Electricity	1990	2e-05	0.09866	0.716164
DJI	Djibouti	Sub-Saharan Africa	Urban	Electricity	1990	0.00061975	0.034715	0.17449
DMA	Dominica	Latin America & the Caribbean	Urban	Electricity	1990	0	0.00013	0.111826
DOM	Dominican Republic	Latin America & the Caribbean	Urban	Electricity	1990	0	0.00037	0.018265
ECU	Ecuador	Latin America & the Caribbean	Urban	Electricity	1990	0	0.004985	0.074592
EGY	Egypt	Western Asia and Northern Africa	Urban	Electricity	1990	0	0.010215	0.155731
SLV	El Salvador	Latin America & the Caribbean	Urban	Electricity	1990	0	0.054245	0.277957
GNQ	Equatorial Guinea	Sub-Saharan Africa	Urban	Electricity	1990	0	0.008495	0.41039
ERI	Eritrea	Sub-Saharan Africa	Urban	Electricity	1990	0.00023975	0.007145	0.0479663
ETH	Ethiopia	Sub-Saharan Africa	Urban	Electricity	1990	0	0.018355	0.157003
FJI	Fiji	Oceania excluding Australia and New Zealand	Urban	Electricity	1990	1e-05	0.023185	0.164872
GAB	Gabon	Sub-Saharan Africa	Urban	Electricity	1990	0	0	0.00111025
GMB	Gambia	Sub-Saharan Africa	Urban	Electricity	1990	0	3e-05	0.012761
GEO	Georgia	Western Asia and Northern Africa	Urban	Electricity	1990	0.031149	0.37452	0.847452
GHA	Ghana	Sub-Saharan Africa	Urban	Electricity	1990	0.00545975	0.01882	0.0438417
GRD	Grenada	Latin America & the Caribbean	Urban	Electricity	1990	0	0.011275	0.289521
GTM	Guatemala	Latin America & the Caribbean	Urban	Electricity	1990	0	0.005595	0.324962
GIN	Guinea	Sub-Saharan Africa	Urban	Electricity	1990	4e-05	0.012745	0.10282
GNB	Guinea-Bissau	Sub-Saharan Africa	Urban	Electricity	1990	0	0.00029	0.0394803
GUY	Guyana	Latin America & the Caribbean	Urban	Electricity	1990	0.00223975	0.06313	0.329356
HTI	Haiti	Latin America & the Caribbean	Urban	Electricity	1990	0	0.00025	0.01626
HND	Honduras	Latin America & the Caribbean	Urban	Electricity	1990	0.0148695	0.14273	0.477361
IND	India	Central Asia and Southern Asia	Urban	Electricity	1990	0	0.00027	0.0196505
IDN	Indonesia	Eastern Asia and South-eastern Asia	Urban	Electricity	1990	0.00247975	0.01736	0.0542118
IRN	Iran (Islamic Republic of)	Central Asia and Southern Asia	Urban	Electricity	1990	0	0.00253	0.223568
IRQ	Iraq	Western Asia and Northern Africa	Urban	Electricity	1990	0	0.00136	0.0994105
JAM	Jamaica	Latin America & the Caribbean	Urban	Electricity	1990	0	0.01369	0.134928
JOR	Jordan	Western Asia and Northern Africa	Urban	Electricity	1990	0	0.00055	0.0716472
KAZ	Kazakhstan	Central Asia and Southern Asia	Urban	Electricity	1990	0.0096295	0.225865	0.681631
KEN	Kenya	Sub-Saharan Africa	Urban	Electricity	1990	0	0.000555	0.0683113
KIR	Kiribati	Oceania excluding Australia and New Zealand	Urban	Electricity	1990	0	0.00131	0.176818
KGZ	Kyrgyzstan	Central Asia and Southern Asia	Urban	Electricity	1990	0.0006	0.09948	0.617994
LAO	Lao People's Democratic Republic	Eastern Asia and South-eastern Asia	Urban	Electricity	1990	0	0	0.200046
LSO	Lesotho	Sub-Saharan Africa	Urban	Electricity	1990	0	0.002355	0.094994
LBR	Liberia	Sub-Saharan Africa	Urban	Electricity	1990	0	0.001175	0.135237
MDG	Madagascar	Sub-Saharan Africa	Urban	Electricity	1990	0	0.012935	0.0602922
MWI	Malawi	Sub-Saharan Africa	Urban	Electricity	1990	0.0188892	0.12267	0.382331
MYS	Malaysia	Eastern Asia and South-eastern Asia	Urban	Electricity	1990	0	0.003795	0.229305
MDV	Maldives	Central Asia and Southern Asia	Urban	Electricity	1990	0	0.000625	0.0781968
MLI	Mali	Sub-Saharan Africa	Urban	Electricity	1990	0	1e-05	0.0151533
MHL	Marshall Islands	Oceania excluding Australia and New Zealand	Urban	Electricity	1990	0	0.05839	0.587171
MRT	Mauritania	Sub-Saharan Africa	Urban	Electricity	1990	0	0.00637	0.111975
MEX	Mexico	Latin America & the Caribbean	Urban	Electricity	1990	0	0.00369	0.0302807
FSM	Micronesia, Federated States of	Oceania excluding Australia and New Zealand	Urban	Electricity	1990	0	0.002935	0.856299
MNG	Mongolia	Eastern Asia and South-eastern Asia	Urban	Electricity	1990	0.118778	0.504925	0.872746
MNE	Montenegro	Northern America and Europe	Urban	Electricity	1990	0.169783	0.771465	0.982762
MAR	Morocco	Western Asia and Northern Africa	Urban	Electricity	1990	0	0.001025	0.0802368
MOZ	Mozambique	Sub-Saharan Africa	Urban	Electricity	1990	3e-05	0.026075	0.280028
MMR	Myanmar	Eastern Asia and South-eastern Asia	Urban	Electricity	1990	0	0.02844	0.416882
NAM	Namibia	Sub-Saharan Africa	Urban	Electricity	1990	0.265959	0.706545	0.960434
NPL	Nepal	Central Asia and Southern Asia	Urban	Electricity	1990	0	0.00044	0.022611
NIC	Nicaragua	Latin America & the Caribbean	Urban	Electricity	1990	0	0.02728	0.0855618
NER	Niger	Sub-Saharan Africa	Urban	Electricity	1990	0.00029975	0.010975	0.067842
NGA	Nigeria	Sub-Saharan Africa	Urban	Electricity	1990	1e-05	0.00611	0.11364
NIU	Niue	Oceania excluding Australia and New Zealand	Urban	Electricity	1990	0	0.021855	0.913571
PAK	Pakistan	Central Asia and Southern Asia	Urban	Electricity	1990	0	0.00033	0.011311
PNG	Papua New Guinea	Oceania excluding Australia and New Zealand	Urban	Electricity	1990	0.00087975	0.103195	0.493349
PRY	Paraguay	Latin America & the Caribbean	Urban	Electricity	1990	0	0.00142	0.016191
PER	Peru	Latin America & the Caribbean	Urban	Electricity	1990	0.00025	0.00782	0.056702
PHL	Philippines	Eastern Asia and South-eastern Asia	Urban	Electricity	1990	0.01417	0.05247	0.118896
MDA	Moldova, Republic of	Northern America and Europe	Urban	Electricity	1990	0.00098975	0.085385	0.445753
RUS	Russian Federation	Northern America and Europe	Urban	Electricity	1990	0.061636	0.37378	0.800431
RWA	Rwanda	Sub-Saharan Africa	Urban	Electricity	1990	0	0.020105	0.205085
LCA	Saint Lucia	Latin America & the Caribbean	Urban	Electricity	1990	0	0.004705	0.131733
VCT	Saint Vincent and the Grenadines	Latin America & the Caribbean	Urban	Electricity	1990	0	0.002685	0.134591
WSM	Samoa	Oceania excluding Australia and New Zealand	Urban	Electricity	1990	0.0002095	0.168925	0.755525
STP	Sao Tome And Principe	Sub-Saharan Africa	Urban	Electricity	1990	0	0	0.006381
SEN	Senegal	Sub-Saharan Africa	Urban	Electricity	1990	0	0.00062	0.0199252
SRB	Serbia	Northern America and Europe	Urban	Electricity	1990	0.0904775	0.60664	0.940163
SLE	Sierra Leone	Sub-Saharan Africa	Urban	Electricity	1990	0	0.00037	0.319112
SLB	Solomon Islands	Oceania excluding Australia and New Zealand	Urban	Electricity	1990	0	0.006695	0.202828
SOM	Somalia	Sub-Saharan Africa	Urban	Electricity	1990	0	0.0004	0.0540955
ZAF	South Africa	Sub-Saharan Africa	Urban	Electricity	1990	0.444427	0.656845	0.833341
SSD	South Sudan	Sub-Saharan Africa	Urban	Electricity	1990	0	0	0.00074025
LKA	Sri Lanka	Central Asia and Southern Asia	Urban	Electricity	1990	0	0.028475	0.478784
SDN	Sudan	Western Asia and Northern Africa	Urban	Electricity	1990	0	3e-05	0.006621
SUR	Suriname	Latin America & the Caribbean	Urban	Electricity	1990	0	0.011235	0.258782
SWZ	Eswatini	Sub-Saharan Africa	Urban	Electricity	1990	0.157626	0.32807	0.551697
SYR	Syrian Arab Republic	Western Asia and Northern Africa	Urban	Electricity	1990	0	0.012155	0.424523
TJK	Tajikistan	Central Asia and Southern Asia	Urban	Electricity	1990	0.0306095	0.24881	0.689323
THA	Thailand	Eastern Asia and South-eastern Asia	Urban	Electricity	1990	0.005049	0.05041	0.150047
MKD	North Macedonia	Northern America and Europe	Urban	Electricity	1990	0.0179837	0.4287	0.941478
TLS	Timor-Leste	Eastern Asia and South-eastern Asia	Urban	Electricity	1990	0	0.00946	0.302507
TGO	Togo	Sub-Saharan Africa	Urban	Electricity	1990	0	6e-05	0.0132283
TON	Tonga	Oceania excluding Australia and New Zealand	Urban	Electricity	1990	0	0.04303	0.565691
TUN	Tunisia	Western Asia and Northern Africa	Urban	Electricity	1990	0	0.00491	0.19345
TUR	Turkey	Western Asia and Northern Africa	Urban	Electricity	1990	0	0.015105	0.517053
TKM	Turkmenistan	Central Asia and Southern Asia	Urban	Electricity	1990	0	0.004595	0.177084
TUV	Tuvalu	Oceania excluding Australia and New Zealand	Urban	Electricity	1990	0	0.00129	0.353852
UGA	Uganda	Sub-Saharan Africa	Urban	Electricity	1990	0.00121	0.044645	0.191808
UKR	Ukraine	Northern America and Europe	Urban	Electricity	1990	0	0.02247	0.285246
TZA	Tanzania, United Republic of	Sub-Saharan Africa	Urban	Electricity	1990	0	0.00051	0.027765
UZB	Uzbekistan	Central Asia and Southern Asia	Urban	Electricity	1990	0	0.024355	0.37407
VUT	Vanuatu	Oceania excluding Australia and New Zealand	Urban	Electricity	1990	0	0.03344	0.443288
VEN	Venezuela (Bolivarian Republic of)	Latin America & the Caribbean	Urban	Electricity	1990	0	0.0305	0.302536
VNM	Viet Nam	Eastern Asia and South-eastern Asia	Urban	Electricity	1990	3e-05	0.0085	0.048721
YEM	Yemen	Western Asia and Northern Africa	Urban	Electricity	1990	0	0.01193	0.371998
ZMB	Zambia	Sub-Saharan Africa	Urban	Electricity	1990	0.174962	0.280915	0.402111
ZWE	Zimbabwe	Sub-Saharan Africa	Urban	Electricity	1990	0.44635	0.90078	0.989711
AFG	Afghanistan	Central Asia and Southern Asia	Urban	Biomass	1990	0.0116898	0.34587	0.906158
ALB	Albania	Northern America and Europe	Urban	Biomass	1990	0.0158882	0.459265	0.949967
DZA	Algeria	Western Asia and Northern Africa	Urban	Biomass	1990	0	0.002205	0.353291
AGO	Angola	Sub-Saharan Africa	Urban	Biomass	1990	0.00384925	0.05878	0.223251
ARG	Argentina	Latin America & the Caribbean	Urban	Biomass	1990	7e-05	0.031975	0.15264
ARM	Armenia	Western Asia and Northern Africa	Urban	Biomass	1990	0	0.09864	0.624907
AZE	Azerbaijan	Western Asia and Northern Africa	Urban	Biomass	1990	0	0.03339	0.355243
BGD	Bangladesh	Central Asia and Southern Asia	Urban	Biomass	1990	0.408986	0.65201	0.857798
BLR	Belarus	Northern America and Europe	Urban	Biomass	1990	0	0.0099	0.414532
BLZ	Belize	Latin America & the Caribbean	Urban	Biomass	1990	0.0038	0.048945	0.150015
BEN	Benin	Sub-Saharan Africa	Urban	Biomass	1990	0.551023	0.817285	0.960283
BTN	Bhutan	Central Asia and Southern Asia	Urban	Biomass	1990	0.00016	0.054525	0.374997
BOL	Bolivia (Plurinational State of)	Latin America & the Caribbean	Urban	Biomass	1990	0.0249587	0.08387	0.17074
BIH	Bosnia and Herzegovina	Northern America and Europe	Urban	Biomass	1990	0.00014975	0.05373	0.517851
BWA	Botswana	Sub-Saharan Africa	Urban	Biomass	1990	0.00096	0.229265	0.702197
BRA	Brazil	Latin America & the Caribbean	Urban	Biomass	1990	0.0089765	0.080865	0.217426
BFA	Burkina Faso	Sub-Saharan Africa	Urban	Biomass	1990	0.555509	0.84157	0.96316
BDI	Burundi	Sub-Saharan Africa	Urban	Biomass	1990	0.025751	0.41249	0.92438
CPV	Cabo Verde	Sub-Saharan Africa	Urban	Biomass	1990	0.00255975	0.06454	0.329088
KHM	Cambodia	Eastern Asia and South-eastern Asia	Urban	Biomass	1990	0.453295	0.756755	0.93009
CMR	Cameroon	Sub-Saharan Africa	Urban	Biomass	1990	0.365167	0.773245	0.967878
CAF	Central African Republic	Sub-Saharan Africa	Urban	Biomass	1990	0.207134	0.85844	0.9988
TCD	Chad	Sub-Saharan Africa	Urban	Biomass	1990	1e-05	0.160455	0.930326
CHN	China	Eastern Asia and South-eastern Asia	Urban	Biomass	1990	0.00176	0.05538	0.326416
COL	Colombia	Latin America & the Caribbean	Urban	Biomass	1990	0.0126093	0.060295	0.145674
COM	Comoros	Sub-Saharan Africa	Urban	Biomass	1990	0.267239	0.786445	0.983205
COG	Congo	Sub-Saharan Africa	Urban	Biomass	1990	0.0123873	0.28201	0.826936
COK	Cook Islands	Oceania excluding Australia and New Zealand	Urban	Biomass	1990	0	0.000375	0.524304
CRI	Costa Rica	Latin America & the Caribbean	Urban	Biomass	1990	0	0.02875	0.256647
CIV	Côte d'Ivoire	Sub-Saharan Africa	Urban	Biomass	1990	0.00996925	0.196765	0.713598
PRK	Democratic Peoples Republic of Korea	Eastern Asia and South-eastern Asia	Urban	Biomass	1990	0.0054385	0.37128	0.934581
COD	Democratic Republic of the Congo	Sub-Saharan Africa	Urban	Biomass	1990	0.012639	0.36062	0.896779
DJI	Djibouti	Sub-Saharan Africa	Urban	Biomass	1990	0	0.01944	0.148288
DMA	Dominica	Latin America & the Caribbean	Urban	Biomass	1990	0	0.00018	0.503842
DOM	Dominican Republic	Latin America & the Caribbean	Urban	Biomass	1990	0.00652875	0.02788	0.074771
ECU	Ecuador	Latin America & the Caribbean	Urban	Biomass	1990	0	0.01179	0.227139
EGY	Egypt	Western Asia and Northern Africa	Urban	Biomass	1990	0	0.003985	0.16366
SLV	El Salvador	Latin America & the Caribbean	Urban	Biomass	1990	0.0133598	0.347965	0.821283
GNQ	Equatorial Guinea	Sub-Saharan Africa	Urban	Biomass	1990	0	0.090855	0.868007
ERI	Eritrea	Sub-Saharan Africa	Urban	Biomass	1990	0.0436687	0.246035	0.555535
ETH	Ethiopia	Sub-Saharan Africa	Urban	Biomass	1990	0.351837	0.63443	0.85815
FJI	Fiji	Oceania excluding Australia and New Zealand	Urban	Biomass	1990	2e-05	0.113795	0.712123
GAB	Gabon	Sub-Saharan Africa	Urban	Biomass	1990	0.017949	0.245985	0.717868
GMB	Gambia	Sub-Saharan Africa	Urban	Biomass	1990	0.784036	0.95571	0.99928
GEO	Georgia	Western Asia and Northern Africa	Urban	Biomass	1990	0.00041	0.1662	0.775628
GHA	Ghana	Sub-Saharan Africa	Urban	Biomass	1990	0.169088	0.309755	0.464203
GRD	Grenada	Latin America & the Caribbean	Urban	Biomass	1990	0	0	0.0038915
GTM	Guatemala	Latin America & the Caribbean	Urban	Biomass	1990	0.0491738	0.289635	0.692725
GIN	Guinea	Sub-Saharan Africa	Urban	Biomass	1990	0.204624	0.4845	0.763461
GNB	Guinea-Bissau	Sub-Saharan Africa	Urban	Biomass	1990	0.0173557	0.401915	0.84681
GUY	Guyana	Latin America & the Caribbean	Urban	Biomass	1990	0	0.00875	0.142662
HTI	Haiti	Latin America & the Caribbean	Urban	Biomass	1990	0.00082	0.15737	0.683847
HND	Honduras	Latin America & the Caribbean	Urban	Biomass	1990	0.0198565	0.281755	0.796386
IND	India	Central Asia and Southern Asia	Urban	Biomass	1990	0.224228	0.356675	0.498412
IDN	Indonesia	Eastern Asia and South-eastern Asia	Urban	Biomass	1990	0.112675	0.234655	0.387584
IRN	Iran (Islamic Republic of)	Central Asia and Southern Asia	Urban	Biomass	1990	0	0.0001	0.138857
IRQ	Iraq	Western Asia and Northern Africa	Urban	Biomass	1990	0	0.008585	0.399119
JAM	Jamaica	Latin America & the Caribbean	Urban	Biomass	1990	0	0.00019	0.207347
JOR	Jordan	Western Asia and Northern Africa	Urban	Biomass	1990	0	0	0.0298903
KAZ	Kazakhstan	Central Asia and Southern Asia	Urban	Biomass	1990	0	0.00584	0.153653
KEN	Kenya	Sub-Saharan Africa	Urban	Biomass	1990	0.00576725	0.102455	0.40397
KIR	Kiribati	Oceania excluding Australia and New Zealand	Urban	Biomass	1990	0.00196925	0.394715	0.984222
KGZ	Kyrgyzstan	Central Asia and Southern Asia	Urban	Biomass	1990	0	0.006005	0.26461
LAO	Lao People's Democratic Republic	Eastern Asia and South-eastern Asia	Urban	Biomass	1990	0.409267	0.677615	0.876224
LSO	Lesotho	Sub-Saharan Africa	Urban	Biomass	1990	0.00981375	0.14005	0.528074
LBR	Liberia	Sub-Saharan Africa	Urban	Biomass	1990	0.00121975	0.11972	0.727442
MDG	Madagascar	Sub-Saharan Africa	Urban	Biomass	1990	0.192888	0.471745	0.759173
MWI	Malawi	Sub-Saharan Africa	Urban	Biomass	1990	0.37423	0.672085	0.88135
MYS	Malaysia	Eastern Asia and South-eastern Asia	Urban	Biomass	1990	0	0.00039	0.086786
MDV	Maldives	Central Asia and Southern Asia	Urban	Biomass	1990	0	0	0.036722
MLI	Mali	Sub-Saharan Africa	Urban	Biomass	1990	0.778577	0.96539	0.9996
MHL	Marshall Islands	Oceania excluding Australia and New Zealand	Urban	Biomass	1990	0	0.02422	0.644246
MRT	Mauritania	Sub-Saharan Africa	Urban	Biomass	1990	0.0453775	0.22643	0.505569
MEX	Mexico	Latin America & the Caribbean	Urban	Biomass	1990	0	0.00384	0.0837512
FSM	Micronesia, Federated States of	Oceania excluding Australia and New Zealand	Urban	Biomass	1990	0	2e-05	0.905191
MNG	Mongolia	Eastern Asia and South-eastern Asia	Urban	Biomass	1990	0.0759158	0.36787	0.747401
MNE	Montenegro	Northern America and Europe	Urban	Biomass	1990	0.00015	0.06195	0.56124
MAR	Morocco	Western Asia and Northern Africa	Urban	Biomass	1990	0	0.0046	0.179604
MOZ	Mozambique	Sub-Saharan Africa	Urban	Biomass	1990	0.064564	0.456835	0.901667
MMR	Myanmar	Eastern Asia and South-eastern Asia	Urban	Biomass	1990	0.024483	0.449135	0.915477
NAM	Namibia	Sub-Saharan Africa	Urban	Biomass	1990	0.00285	0.08529	0.394781
NPL	Nepal	Central Asia and Southern Asia	Urban	Biomass	1990	0.131673	0.662145	0.973622
NIC	Nicaragua	Latin America & the Caribbean	Urban	Biomass	1990	0.400445	0.601265	0.776046
NER	Niger	Sub-Saharan Africa	Urban	Biomass	1990	0.756841	0.93161	0.996532
NGA	Nigeria	Sub-Saharan Africa	Urban	Biomass	1990	0.0665328	0.43547	0.860705
NIU	Niue	Oceania excluding Australia and New Zealand	Urban	Biomass	1990	0	2e-05	0.0358525
PAK	Pakistan	Central Asia and Southern Asia	Urban	Biomass	1990	0.116782	0.399835	0.752311
PNG	Papua New Guinea	Oceania excluding Australia and New Zealand	Urban	Biomass	1990	0.0100687	0.489365	0.97876
PRY	Paraguay	Latin America & the Caribbean	Urban	Biomass	1990	0.0758682	0.156015	0.262418
PER	Peru	Latin America & the Caribbean	Urban	Biomass	1990	0.0030195	0.05697	0.291698
PHL	Philippines	Eastern Asia and South-eastern Asia	Urban	Biomass	1990	0.178366	0.3648	0.553874
MDA	Moldova, Republic of	Northern America and Europe	Urban	Biomass	1990	0	0.076835	0.558542
RUS	Russian Federation	Northern America and Europe	Urban	Biomass	1990	0	0	0.03184
RWA	Rwanda	Sub-Saharan Africa	Urban	Biomass	1990	0.0169543	0.183905	0.589304
LCA	Saint Lucia	Latin America & the Caribbean	Urban	Biomass	1990	0	0.04429	0.406444
VCT	Saint Vincent and the Grenadines	Latin America & the Caribbean	Urban	Biomass	1990	0	0.00276	0.171642
WSM	Samoa	Oceania excluding Australia and New Zealand	Urban	Biomass	1990	0.00074	0.18734	0.894168
STP	Sao Tome And Principe	Sub-Saharan Africa	Urban	Biomass	1990	0.0760055	0.644815	0.976711
SEN	Senegal	Sub-Saharan Africa	Urban	Biomass	1990	0.0631188	0.164555	0.330631
SRB	Serbia	Northern America and Europe	Urban	Biomass	1990	0.00050975	0.11328	0.7042
SLE	Sierra Leone	Sub-Saharan Africa	Urban	Biomass	1990	0.0953907	0.578335	0.944212
SLB	Solomon Islands	Oceania excluding Australia and New Zealand	Urban	Biomass	1990	0.0451877	0.56737	0.975845
SOM	Somalia	Sub-Saharan Africa	Urban	Biomass	1990	0.019492	0.30076	0.835884
ZAF	South Africa	Sub-Saharan Africa	Urban	Biomass	1990	0.0019595	0.017565	0.0634437
SSD	South Sudan	Sub-Saharan Africa	Urban	Biomass	1990	0.0292855	0.68252	0.997452
LKA	Sri Lanka	Central Asia and Southern Asia	Urban	Biomass	1990	0.00790875	0.222105	0.804682
SDN	Sudan	Western Asia and Northern Africa	Urban	Biomass	1990	0.480748	0.904055	0.996551
SUR	Suriname	Latin America & the Caribbean	Urban	Biomass	1990	3.975e-05	0.08161	0.669941
SWZ	Eswatini	Sub-Saharan Africa	Urban	Biomass	1990	0.0300088	0.135905	0.342147
SYR	Syrian Arab Republic	Western Asia and Northern Africa	Urban	Biomass	1990	0	0.00166	0.179564
TJK	Tajikistan	Central Asia and Southern Asia	Urban	Biomass	1990	0.0158928	0.260955	0.759459
THA	Thailand	Eastern Asia and South-eastern Asia	Urban	Biomass	1990	8e-05	0.033605	0.134183
MKD	North Macedonia	Northern America and Europe	Urban	Biomass	1990	0.00744825	0.394765	0.934941
TLS	Timor-Leste	Eastern Asia and South-eastern Asia	Urban	Biomass	1990	0.150615	0.86711	0.99963
TGO	Togo	Sub-Saharan Africa	Urban	Biomass	1990	0.00329875	0.160625	0.746124
TON	Tonga	Oceania excluding Australia and New Zealand	Urban	Biomass	1990	0	0.080175	0.73307
TUN	Tunisia	Western Asia and Northern Africa	Urban	Biomass	1990	0	0.00046	0.103703
TUR	Turkey	Western Asia and Northern Africa	Urban	Biomass	1990	0	0.004725	0.303829
TKM	Turkmenistan	Central Asia and Southern Asia	Urban	Biomass	1990	0	0	0.0182243
TUV	Tuvalu	Oceania excluding Australia and New Zealand	Urban	Biomass	1990	0	0.06291	0.980592
UGA	Uganda	Sub-Saharan Africa	Urban	Biomass	1990	0.142488	0.335565	0.565413
UKR	Ukraine	Northern America and Europe	Urban	Biomass	1990	0	0.008	0.23006
TZA	Tanzania, United Republic of	Sub-Saharan Africa	Urban	Biomass	1990	0.858268	0.95146	0.990602
UZB	Uzbekistan	Central Asia and Southern Asia	Urban	Biomass	1990	0	0.009085	0.264462
VUT	Vanuatu	Oceania excluding Australia and New Zealand	Urban	Biomass	1990	0.011989	0.32358	0.924777
VEN	Venezuela (Bolivarian Republic of)	Latin America & the Caribbean	Urban	Biomass	1990	0	0.00015	0.0653408
VNM	Viet Nam	Eastern Asia and South-eastern Asia	Urban	Biomass	1990	0.398129	0.60214	0.778298
YEM	Yemen	Western Asia and Northern Africa	Urban	Biomass	1990	0	0.02422	0.518343
ZMB	Zambia	Sub-Saharan Africa	Urban	Biomass	1990	0.0918502	0.15422	0.240392
ZWE	Zimbabwe	Sub-Saharan Africa	Urban	Biomass	1990	0.0003795	0.04384	0.259025
AFG	Afghanistan	Central Asia and Southern Asia	Urban	Charcoal	1990	0.00015	0.087005	0.69159
ALB	Albania	Northern America and Europe	Urban	Charcoal	1990	0	1e-05	0.035831
DZA	Algeria	Western Asia and Northern Africa	Urban	Charcoal	1990	0	0	0.063387
AGO	Angola	Sub-Saharan Africa	Urban	Charcoal	1990	0.0084265	0.08981	0.284908
ARG	Argentina	Latin America & the Caribbean	Urban	Charcoal	1990	0	0	0.00054
ARM	Armenia	Western Asia and Northern Africa	Urban	Charcoal	1990	0	0.01127	0.250712
AZE	Azerbaijan	Western Asia and Northern Africa	Urban	Charcoal	1990	0	0.003885	0.09706
BGD	Bangladesh	Central Asia and Southern Asia	Urban	Charcoal	1990	0	1e-05	0.0206013
BLR	Belarus	Northern America and Europe	Urban	Charcoal	1990	0	0	0.00216025
BLZ	Belize	Latin America & the Caribbean	Urban	Charcoal	1990	0	0	0.00033025
BEN	Benin	Sub-Saharan Africa	Urban	Charcoal	1990	0	3e-05	0.134545
BTN	Bhutan	Central Asia and Southern Asia	Urban	Charcoal	1990	0	0	0.0001
BOL	Bolivia (Plurinational State of)	Latin America & the Caribbean	Urban	Charcoal	1990	0	0	2.025e-05
BIH	Bosnia and Herzegovina	Northern America and Europe	Urban	Charcoal	1990	0	0.00025	0.173754
BWA	Botswana	Sub-Saharan Africa	Urban	Charcoal	1990	0	0	0.008141
BRA	Brazil	Latin America & the Caribbean	Urban	Charcoal	1990	0	0.00053	0.0293705
BFA	Burkina Faso	Sub-Saharan Africa	Urban	Charcoal	1990	0.0008195	0.030275	0.154876
BDI	Burundi	Sub-Saharan Africa	Urban	Charcoal	1990	0.0550342	0.533515	0.94975
CPV	Cabo Verde	Sub-Saharan Africa	Urban	Charcoal	1990	0	0	0.003314
KHM	Cambodia	Eastern Asia and South-eastern Asia	Urban	Charcoal	1990	0.0244785	0.15259	0.443553
CMR	Cameroon	Sub-Saharan Africa	Urban	Charcoal	1990	0	0	0.0441513
CAF	Central African Republic	Sub-Saharan Africa	Urban	Charcoal	1990	0	0.037805	0.595033
TCD	Chad	Sub-Saharan Africa	Urban	Charcoal	1990	0.00123925	0.36486	0.932533
CHN	China	Eastern Asia and South-eastern Asia	Urban	Charcoal	1990	0	0	0.00912
COL	Colombia	Latin America & the Caribbean	Urban	Charcoal	1990	0	0	0.0212935
COM	Comoros	Sub-Saharan Africa	Urban	Charcoal	1990	0	0.004395	0.116913
COG	Congo	Sub-Saharan Africa	Urban	Charcoal	1990	0.0263367	0.38705	0.866587
COK	Cook Islands	Oceania excluding Australia and New Zealand	Urban	Charcoal	1990	0	0	0.00886125
CRI	Costa Rica	Latin America & the Caribbean	Urban	Charcoal	1990	0	0	0.00319
CIV	Côte d'Ivoire	Sub-Saharan Africa	Urban	Charcoal	1990	0.0127885	0.185485	0.680353
PRK	Democratic Peoples Republic of Korea	Eastern Asia and South-eastern Asia	Urban	Charcoal	1990	0	3e-05	0.041828
COD	Democratic Republic of the Congo	Sub-Saharan Africa	Urban	Charcoal	1990	0.0166493	0.382405	0.895973
DJI	Djibouti	Sub-Saharan Africa	Urban	Charcoal	1990	0	0.0005	0.0140003
DMA	Dominica	Latin America & the Caribbean	Urban	Charcoal	1990	0	0.00052	0.374963
DOM	Dominican Republic	Latin America & the Caribbean	Urban	Charcoal	1990	0	0	0.209429
ECU	Ecuador	Latin America & the Caribbean	Urban	Charcoal	1990	0	0	0.0363215
EGY	Egypt	Western Asia and Northern Africa	Urban	Charcoal	1990	0	0	0.00092075
SLV	El Salvador	Latin America & the Caribbean	Urban	Charcoal	1990	0	0.00435	0.0975988
GNQ	Equatorial Guinea	Sub-Saharan Africa	Urban	Charcoal	1990	0	0	0.009312
ERI	Eritrea	Sub-Saharan Africa	Urban	Charcoal	1990	0.00034975	0.043195	0.196264
ETH	Ethiopia	Sub-Saharan Africa	Urban	Charcoal	1990	0.00115975	0.044785	0.206407
FJI	Fiji	Oceania excluding Australia and New Zealand	Urban	Charcoal	1990	0	0	0.00326025
GAB	Gabon	Sub-Saharan Africa	Urban	Charcoal	1990	0	0	0.01191
GMB	Gambia	Sub-Saharan Africa	Urban	Charcoal	1990	0	0.00391	0.09822
GEO	Georgia	Western Asia and Northern Africa	Urban	Charcoal	1990	0	1e-05	0.0232718
GHA	Ghana	Sub-Saharan Africa	Urban	Charcoal	1990	0.402485	0.56182	0.716622
GRD	Grenada	Latin America & the Caribbean	Urban	Charcoal	1990	0	0.00981	0.280848
GTM	Guatemala	Latin America & the Caribbean	Urban	Charcoal	1990	0	1e-05	0.00910525
GIN	Guinea	Sub-Saharan Africa	Urban	Charcoal	1990	0.175877	0.447875	0.735525
GNB	Guinea-Bissau	Sub-Saharan Africa	Urban	Charcoal	1990	0.0903435	0.485805	0.901416
GUY	Guyana	Latin America & the Caribbean	Urban	Charcoal	1990	0	0	0.0281558
HTI	Haiti	Latin America & the Caribbean	Urban	Charcoal	1990	0.145336	0.62438	0.930198
HND	Honduras	Latin America & the Caribbean	Urban	Charcoal	1990	0	0	0.00041025
IND	India	Central Asia and Southern Asia	Urban	Charcoal	1990	0	2e-05	0.0489363
IDN	Indonesia	Eastern Asia and South-eastern Asia	Urban	Charcoal	1990	3e-05	0.00241	0.0131305
IRN	Iran (Islamic Republic of)	Central Asia and Southern Asia	Urban	Charcoal	1990	0	0	0.0136928
IRQ	Iraq	Western Asia and Northern Africa	Urban	Charcoal	1990	0	0	0.002452
JAM	Jamaica	Latin America & the Caribbean	Urban	Charcoal	1990	0	0.00019	0.0420533
JOR	Jordan	Western Asia and Northern Africa	Urban	Charcoal	1990	0	0	0.00879075
KAZ	Kazakhstan	Central Asia and Southern Asia	Urban	Charcoal	1990	0	0.002275	0.0643975
KEN	Kenya	Sub-Saharan Africa	Urban	Charcoal	1990	0.0175767	0.164695	0.476132
KIR	Kiribati	Oceania excluding Australia and New Zealand	Urban	Charcoal	1990	0	0	0.03157
KGZ	Kyrgyzstan	Central Asia and Southern Asia	Urban	Charcoal	1990	0	0.024605	0.508055
LAO	Lao People's Democratic Republic	Eastern Asia and South-eastern Asia	Urban	Charcoal	1990	0.005366	0.068675	0.214278
LSO	Lesotho	Sub-Saharan Africa	Urban	Charcoal	1990	0	0	0.00018
LBR	Liberia	Sub-Saharan Africa	Urban	Charcoal	1990	0.16026	0.759995	0.982541
MDG	Madagascar	Sub-Saharan Africa	Urban	Charcoal	1990	0.203059	0.48509	0.756661
MWI	Malawi	Sub-Saharan Africa	Urban	Charcoal	1990	0.013108	0.102075	0.352481
MYS	Malaysia	Eastern Asia and South-eastern Asia	Urban	Charcoal	1990	0	0.00014	0.04919
MDV	Maldives	Central Asia and Southern Asia	Urban	Charcoal	1990	0	0	0.0076505
MLI	Mali	Sub-Saharan Africa	Urban	Charcoal	1990	0	0	0.0684203
MHL	Marshall Islands	Oceania excluding Australia and New Zealand	Urban	Charcoal	1990	0	5e-05	0.0451578
MRT	Mauritania	Sub-Saharan Africa	Urban	Charcoal	1990	0.203447	0.467765	0.747081
MEX	Mexico	Latin America & the Caribbean	Urban	Charcoal	1990	0	3e-05	0.00283
FSM	Micronesia, Federated States of	Oceania excluding Australia and New Zealand	Urban	Charcoal	1990	0	0	0.00606275
MNG	Mongolia	Eastern Asia and South-eastern Asia	Urban	Charcoal	1990	0	1e-05	0.00479125
MNE	Montenegro	Northern America and Europe	Urban	Charcoal	1990	0	0.0025	0.10046
MAR	Morocco	Western Asia and Northern Africa	Urban	Charcoal	1990	0	0	0.0042125
MOZ	Mozambique	Sub-Saharan Africa	Urban	Charcoal	1990	0.0490905	0.38121	0.829454
MMR	Myanmar	Eastern Asia and South-eastern Asia	Urban	Charcoal	1990	0.0395592	0.438245	0.922792
NAM	Namibia	Sub-Saharan Africa	Urban	Charcoal	1990	0	0.0014	0.0299647
NPL	Nepal	Central Asia and Southern Asia	Urban	Charcoal	1990	0	0	0.021971
NIC	Nicaragua	Latin America & the Caribbean	Urban	Charcoal	1990	0	0.00751	0.0806932
NER	Niger	Sub-Saharan Africa	Urban	Charcoal	1990	0	9e-05	0.0327037
NGA	Nigeria	Sub-Saharan Africa	Urban	Charcoal	1990	0	8e-05	0.0952973
NIU	Niue	Oceania excluding Australia and New Zealand	Urban	Charcoal	1990	0	0.00016	0.190827
PAK	Pakistan	Central Asia and Southern Asia	Urban	Charcoal	1990	0	0	0.0298412
PNG	Papua New Guinea	Oceania excluding Australia and New Zealand	Urban	Charcoal	1990	0	0	0.0199108
PRY	Paraguay	Latin America & the Caribbean	Urban	Charcoal	1990	0.0556245	0.119015	0.201416
PER	Peru	Latin America & the Caribbean	Urban	Charcoal	1990	0	0.00034	0.0131837
PHL	Philippines	Eastern Asia and South-eastern Asia	Urban	Charcoal	1990	0.0152995	0.05852	0.13448
MDA	Moldova, Republic of	Northern America and Europe	Urban	Charcoal	1990	0	0	0.0205715
RUS	Russian Federation	Northern America and Europe	Urban	Charcoal	1990	0	0	8e-05
RWA	Rwanda	Sub-Saharan Africa	Urban	Charcoal	1990	0.338258	0.730395	0.955631
LCA	Saint Lucia	Latin America & the Caribbean	Urban	Charcoal	1990	0	0.39083	0.834751
VCT	Saint Vincent and the Grenadines	Latin America & the Caribbean	Urban	Charcoal	1990	0	5e-05	0.0213032
WSM	Samoa	Oceania excluding Australia and New Zealand	Urban	Charcoal	1990	0	0	0.0240533
STP	Sao Tome And Principe	Sub-Saharan Africa	Urban	Charcoal	1990	2e-05	0.08057	0.643562
SEN	Senegal	Sub-Saharan Africa	Urban	Charcoal	1990	0.00038975	0.46451	0.656682
SRB	Serbia	Northern America and Europe	Urban	Charcoal	1990	0	4e-05	0.0218435
SLE	Sierra Leone	Sub-Saharan Africa	Urban	Charcoal	1990	0.00512875	0.15072	0.641552
SLB	Solomon Islands	Oceania excluding Australia and New Zealand	Urban	Charcoal	1990	0	1e-05	0.130887
SOM	Somalia	Sub-Saharan Africa	Urban	Charcoal	1990	0.139372	0.663475	0.967353
ZAF	South Africa	Sub-Saharan Africa	Urban	Charcoal	1990	0	0	0.00185025
SSD	South Sudan	Sub-Saharan Africa	Urban	Charcoal	1990	1e-05	0.178375	0.895324
LKA	Sri Lanka	Central Asia and Southern Asia	Urban	Charcoal	1990	0	0.0001	0.062068
SDN	Sudan	Western Asia and Northern Africa	Urban	Charcoal	1990	0	0	0.082466
SUR	Suriname	Latin America & the Caribbean	Urban	Charcoal	1990	0	0.008	0.269325
SWZ	Eswatini	Sub-Saharan Africa	Urban	Charcoal	1990	0	0	0.00800125
SYR	Syrian Arab Republic	Western Asia and Northern Africa	Urban	Charcoal	1990	0	0	0.00266025
TJK	Tajikistan	Central Asia and Southern Asia	Urban	Charcoal	1990	0	0.00256	0.0940515
THA	Thailand	Eastern Asia and South-eastern Asia	Urban	Charcoal	1990	0.0206288	0.12882	0.280436
MKD	North Macedonia	Northern America and Europe	Urban	Charcoal	1990	0	0.00032	0.096325
TLS	Timor-Leste	Eastern Asia and South-eastern Asia	Urban	Charcoal	1990	0	0.00095	0.197058
TGO	Togo	Sub-Saharan Africa	Urban	Charcoal	1990	0.220422	0.78485	0.982651
TON	Tonga	Oceania excluding Australia and New Zealand	Urban	Charcoal	1990	0	0	0.0094405
TUN	Tunisia	Western Asia and Northern Africa	Urban	Charcoal	1990	0	0.0014	0.194751
TUR	Turkey	Western Asia and Northern Africa	Urban	Charcoal	1990	0	0	0.0022915
TKM	Turkmenistan	Central Asia and Southern Asia	Urban	Charcoal	1990	0	0	0.00521075
TUV	Tuvalu	Oceania excluding Australia and New Zealand	Urban	Charcoal	1990	0	0	0.0237115
UGA	Uganda	Sub-Saharan Africa	Urban	Charcoal	1990	0.32625	0.55824	0.773786
UKR	Ukraine	Northern America and Europe	Urban	Charcoal	1990	0	0.0001	0.0472632
TZA	Tanzania, United Republic of	Sub-Saharan Africa	Urban	Charcoal	1990	0.0071495	0.044135	0.131173
UZB	Uzbekistan	Central Asia and Southern Asia	Urban	Charcoal	1990	0	8e-05	0.0453807
VUT	Vanuatu	Oceania excluding Australia and New Zealand	Urban	Charcoal	1990	0	0.00026	0.103082
VEN	Venezuela (Bolivarian Republic of)	Latin America & the Caribbean	Urban	Charcoal	1990	0	0	0.0003
VNM	Viet Nam	Eastern Asia and South-eastern Asia	Urban	Charcoal	1990	0.0161668	0.258295	0.457587
YEM	Yemen	Western Asia and Northern Africa	Urban	Charcoal	1990	0	0	0.0196503
ZMB	Zambia	Sub-Saharan Africa	Urban	Charcoal	1990	0.430829	0.546965	0.65554
ZWE	Zimbabwe	Sub-Saharan Africa	Urban	Charcoal	1990	0	2e-05	0.003891
AFG	Afghanistan	Central Asia and Southern Asia	Urban	Coal	1990	0	8e-05	0.125675
ALB	Albania	Northern America and Europe	Urban	Coal	1990	0	0	0.0015905
DZA	Algeria	Western Asia and Northern Africa	Urban	Coal	1990	0	0	0.00104025
AGO	Angola	Sub-Saharan Africa	Urban	Coal	1990	0	0	0.00302125
ARG	Argentina	Latin America & the Caribbean	Urban	Coal	1990	0	0	0.00056
ARM	Armenia	Western Asia and Northern Africa	Urban	Coal	1990	0	0	0.00945175
AZE	Azerbaijan	Western Asia and Northern Africa	Urban	Coal	1990	0	0	0.00298075
BGD	Bangladesh	Central Asia and Southern Asia	Urban	Coal	1990	0	0	0.00139025
BLR	Belarus	Northern America and Europe	Urban	Coal	1990	0	0	0.00189
BLZ	Belize	Latin America & the Caribbean	Urban	Coal	1990	0	1e-05	0.00520225
BEN	Benin	Sub-Saharan Africa	Urban	Coal	1990	0	0	0.00046
BTN	Bhutan	Central Asia and Southern Asia	Urban	Coal	1990	0	0	0.005382
BOL	Bolivia (Plurinational State of)	Latin America & the Caribbean	Urban	Coal	1990	0	0	0.0027225
BIH	Bosnia and Herzegovina	Northern America and Europe	Urban	Coal	1990	0	0.035795	0.403832
BWA	Botswana	Sub-Saharan Africa	Urban	Coal	1990	0	0.00019	0.0213405
BRA	Brazil	Latin America & the Caribbean	Urban	Coal	1990	0	0	0.00015
BFA	Burkina Faso	Sub-Saharan Africa	Urban	Coal	1990	0	2e-05	0.0221348
BDI	Burundi	Sub-Saharan Africa	Urban	Coal	1990	0	0.001345	0.107343
CPV	Cabo Verde	Sub-Saharan Africa	Urban	Coal	1990	0	0	0.00011
KHM	Cambodia	Eastern Asia and South-eastern Asia	Urban	Coal	1990	0	1e-05	0.00515
CMR	Cameroon	Sub-Saharan Africa	Urban	Coal	1990	0	0	0.00016
CAF	Central African Republic	Sub-Saharan Africa	Urban	Coal	1990	0	0.00019	0.0426525
TCD	Chad	Sub-Saharan Africa	Urban	Coal	1990	0	0.0824	0.810644
CHN	China	Eastern Asia and South-eastern Asia	Urban	Coal	1990	0.0235165	0.24333	0.677107
COL	Colombia	Latin America & the Caribbean	Urban	Coal	1990	0	0.012855	0.0422715
COM	Comoros	Sub-Saharan Africa	Urban	Coal	1990	0	0	0.006551
COG	Congo	Sub-Saharan Africa	Urban	Coal	1990	0	1e-05	0.0820898
COK	Cook Islands	Oceania excluding Australia and New Zealand	Urban	Coal	1990	0	0	0.007603
CRI	Costa Rica	Latin America & the Caribbean	Urban	Coal	1990	0	0	8e-05
CIV	Côte d'Ivoire	Sub-Saharan Africa	Urban	Coal	1990	0	0	0.0692948
PRK	Democratic Peoples Republic of Korea	Eastern Asia and South-eastern Asia	Urban	Coal	1990	0.0176985	0.41089	0.942463
COD	Democratic Republic of the Congo	Sub-Saharan Africa	Urban	Coal	1990	0	0.00027	0.0617178
DJI	Djibouti	Sub-Saharan Africa	Urban	Coal	1990	0	0	0.0001
DMA	Dominica	Latin America & the Caribbean	Urban	Coal	1990	0	0.0005	0.201723
DOM	Dominican Republic	Latin America & the Caribbean	Urban	Coal	1990	1e-05	0.166935	0.287293
ECU	Ecuador	Latin America & the Caribbean	Urban	Coal	1990	0	0	0.004264
EGY	Egypt	Western Asia and Northern Africa	Urban	Coal	1990	0	4e-05	0.0286052
SLV	El Salvador	Latin America & the Caribbean	Urban	Coal	1990	0	0	0.0013505
GNQ	Equatorial Guinea	Sub-Saharan Africa	Urban	Coal	1990	0	0.00166	0.252596
ERI	Eritrea	Sub-Saharan Africa	Urban	Coal	1990	0	0	0.00482175
ETH	Ethiopia	Sub-Saharan Africa	Urban	Coal	1990	0	1e-05	0.00254075
FJI	Fiji	Oceania excluding Australia and New Zealand	Urban	Coal	1990	0	0	0.00333075
GAB	Gabon	Sub-Saharan Africa	Urban	Coal	1990	0	0	0.00023025
GMB	Gambia	Sub-Saharan Africa	Urban	Coal	1990	0	0	0.0028705
GEO	Georgia	Western Asia and Northern Africa	Urban	Coal	1990	0	0	0.0065025
GHA	Ghana	Sub-Saharan Africa	Urban	Coal	1990	0	0.00014	0.0236053
GRD	Grenada	Latin America & the Caribbean	Urban	Coal	1990	0	0	0.00596475
GTM	Guatemala	Latin America & the Caribbean	Urban	Coal	1990	0	0	0.00752025
GIN	Guinea	Sub-Saharan Africa	Urban	Coal	1990	0	4e-05	0.0438488
GNB	Guinea-Bissau	Sub-Saharan Africa	Urban	Coal	1990	0	4e-05	0.0207503
GUY	Guyana	Latin America & the Caribbean	Urban	Coal	1990	0	0.006605	0.138528
HTI	Haiti	Latin America & the Caribbean	Urban	Coal	1990	0	0.00017	0.0313203
HND	Honduras	Latin America & the Caribbean	Urban	Coal	1990	0	4e-05	0.022964
IND	India	Central Asia and Southern Asia	Urban	Coal	1990	0.041512	0.10061	0.168467
IDN	Indonesia	Eastern Asia and South-eastern Asia	Urban	Coal	1990	0	0	0.00098025
IRN	Iran (Islamic Republic of)	Central Asia and Southern Asia	Urban	Coal	1990	0	0	0.0213063
IRQ	Iraq	Western Asia and Northern Africa	Urban	Coal	1990	0	0	0.00180025
JAM	Jamaica	Latin America & the Caribbean	Urban	Coal	1990	0	0	0.002081
JOR	Jordan	Western Asia and Northern Africa	Urban	Coal	1990	0	0	0.00033025
KAZ	Kazakhstan	Central Asia and Southern Asia	Urban	Coal	1990	0	0.01708	0.196245
KEN	Kenya	Sub-Saharan Africa	Urban	Coal	1990	0	0	0.00556025
KIR	Kiribati	Oceania excluding Australia and New Zealand	Urban	Coal	1990	0	0	0.0386755
KGZ	Kyrgyzstan	Central Asia and Southern Asia	Urban	Coal	1990	0	0.08557	0.69897
LAO	Lao People's Democratic Republic	Eastern Asia and South-eastern Asia	Urban	Coal	1990	0	0	0.00440025
LSO	Lesotho	Sub-Saharan Africa	Urban	Coal	1990	0	0.00025	0.0298715
LBR	Liberia	Sub-Saharan Africa	Urban	Coal	1990	0	0.000455	0.0937227
MDG	Madagascar	Sub-Saharan Africa	Urban	Coal	1990	0	6e-05	0.0117742
MWI	Malawi	Sub-Saharan Africa	Urban	Coal	1990	0	4e-05	0.0046405
MYS	Malaysia	Eastern Asia and South-eastern Asia	Urban	Coal	1990	0	0	0.00097025
MDV	Maldives	Central Asia and Southern Asia	Urban	Coal	1990	0	0	0.007803
MLI	Mali	Sub-Saharan Africa	Urban	Coal	1990	0	0	0.00083025
MHL	Marshall Islands	Oceania excluding Australia and New Zealand	Urban	Coal	1990	0	0	0.0033605
MRT	Mauritania	Sub-Saharan Africa	Urban	Coal	1990	0	0	0.0124835
MEX	Mexico	Latin America & the Caribbean	Urban	Coal	1990	0	0	9e-05
FSM	Micronesia, Federated States of	Oceania excluding Australia and New Zealand	Urban	Coal	1990	0	0	0.0074225
MNG	Mongolia	Eastern Asia and South-eastern Asia	Urban	Coal	1990	0.0085265	0.085025	0.34338
MNE	Montenegro	Northern America and Europe	Urban	Coal	1990	6.975e-05	0.043465	0.409972
MAR	Morocco	Western Asia and Northern Africa	Urban	Coal	1990	0	2e-05	0.0119433
MOZ	Mozambique	Sub-Saharan Africa	Urban	Coal	1990	0	0.00131	0.0676475
MMR	Myanmar	Eastern Asia and South-eastern Asia	Urban	Coal	1990	0	0.00067	0.0561658
NAM	Namibia	Sub-Saharan Africa	Urban	Coal	1990	0	6e-05	0.0190037
NPL	Nepal	Central Asia and Southern Asia	Urban	Coal	1990	0	0	0.0016
NIC	Nicaragua	Latin America & the Caribbean	Urban	Coal	1990	0	0	0.00052
NER	Niger	Sub-Saharan Africa	Urban	Coal	1990	0	0	0.00084075
NGA	Nigeria	Sub-Saharan Africa	Urban	Coal	1990	0	0.00306	0.124909
NIU	Niue	Oceania excluding Australia and New Zealand	Urban	Coal	1990	0	0	0.0063005
PAK	Pakistan	Central Asia and Southern Asia	Urban	Coal	1990	0	0	0.0013205
PNG	Papua New Guinea	Oceania excluding Australia and New Zealand	Urban	Coal	1990	0	0	0.0102525
PRY	Paraguay	Latin America & the Caribbean	Urban	Coal	1990	0	4e-05	0.00256
PER	Peru	Latin America & the Caribbean	Urban	Coal	1990	0	0.00032	0.0113605
PHL	Philippines	Eastern Asia and South-eastern Asia	Urban	Coal	1990	0	3e-05	0.0038905
MDA	Moldova, Republic of	Northern America and Europe	Urban	Coal	1990	0	0	0.00065
RUS	Russian Federation	Northern America and Europe	Urban	Coal	1990	0	0	0.00259025
RWA	Rwanda	Sub-Saharan Africa	Urban	Coal	1990	0	3e-05	0.053866
LCA	Saint Lucia	Latin America & the Caribbean	Urban	Coal	1990	0	3e-05	0.0246248
VCT	Saint Vincent and the Grenadines	Latin America & the Caribbean	Urban	Coal	1990	0	0.00189	0.12173
WSM	Samoa	Oceania excluding Australia and New Zealand	Urban	Coal	1990	0	0	0.022929
STP	Sao Tome And Principe	Sub-Saharan Africa	Urban	Coal	1990	0	7e-05	0.0432792
SEN	Senegal	Sub-Saharan Africa	Urban	Coal	1990	0	0.000155	0.47794
SRB	Serbia	Northern America and Europe	Urban	Coal	1990	0	0.01131	0.24772
SLE	Sierra Leone	Sub-Saharan Africa	Urban	Coal	1990	0	9e-05	0.0196473
SLB	Solomon Islands	Oceania excluding Australia and New Zealand	Urban	Coal	1990	0	0	0.0294363
SOM	Somalia	Sub-Saharan Africa	Urban	Coal	1990	0	0.00012	0.0434215
ZAF	South Africa	Sub-Saharan Africa	Urban	Coal	1990	0.0069685	0.048685	0.137964
SSD	South Sudan	Sub-Saharan Africa	Urban	Coal	1990	0	0.00023	0.0555495
LKA	Sri Lanka	Central Asia and Southern Asia	Urban	Coal	1990	0	0	0.00069025
SDN	Sudan	Western Asia and Northern Africa	Urban	Coal	1990	0	0	0.00045
SUR	Suriname	Latin America & the Caribbean	Urban	Coal	1990	0	1e-05	0.007161
SWZ	Eswatini	Sub-Saharan Africa	Urban	Coal	1990	0.0538467	0.19879	0.436325
SYR	Syrian Arab Republic	Western Asia and Northern Africa	Urban	Coal	1990	0	0	0.00235025
TJK	Tajikistan	Central Asia and Southern Asia	Urban	Coal	1990	0	0	0.076376
THA	Thailand	Eastern Asia and South-eastern Asia	Urban	Coal	1990	0	3e-05	0.005982
MKD	North Macedonia	Northern America and Europe	Urban	Coal	1990	0	0.00099	0.131611
TLS	Timor-Leste	Eastern Asia and South-eastern Asia	Urban	Coal	1990	0	0	0.00788025
TGO	Togo	Sub-Saharan Africa	Urban	Coal	1990	0	0.00018	0.054073
TON	Tonga	Oceania excluding Australia and New Zealand	Urban	Coal	1990	0	0	0.006341
TUN	Tunisia	Western Asia and Northern Africa	Urban	Coal	1990	0	0	0.0118128
TUR	Turkey	Western Asia and Northern Africa	Urban	Coal	1990	0	0.00276	0.206664
TKM	Turkmenistan	Central Asia and Southern Asia	Urban	Coal	1990	0	0	0.0048035
TUV	Tuvalu	Oceania excluding Australia and New Zealand	Urban	Coal	1990	0	0	0.0270307
UGA	Uganda	Sub-Saharan Africa	Urban	Coal	1990	0	7e-05	0.0127005
UKR	Ukraine	Northern America and Europe	Urban	Coal	1990	1e-05	0.038375	0.412899
TZA	Tanzania, United Republic of	Sub-Saharan Africa	Urban	Coal	1990	0	0	0.0013805
UZB	Uzbekistan	Central Asia and Southern Asia	Urban	Coal	1990	0	0.001665	0.128852
VUT	Vanuatu	Oceania excluding Australia and New Zealand	Urban	Coal	1990	0	0	0.0485305
VEN	Venezuela (Bolivarian Republic of)	Latin America & the Caribbean	Urban	Coal	1990	0	0	0.00029025
VNM	Viet Nam	Eastern Asia and South-eastern Asia	Urban	Coal	1990	0	0.00013	0.264678
YEM	Yemen	Western Asia and Northern Africa	Urban	Coal	1990	0	0	0.0021005
ZMB	Zambia	Sub-Saharan Africa	Urban	Coal	1990	0	9e-05	0.014802
ZWE	Zimbabwe	Sub-Saharan Africa	Urban	Coal	1990	0	0	0.00173025
AFG	Afghanistan	Central Asia and Southern Asia	Urban	Total Polluting	1990	0.0520998	0.627565	0.985477
ALB	Albania	Northern America and Europe	Urban	Total Polluting	1990	0.0280913	0.48257	0.959458
DZA	Algeria	Western Asia and Northern Africa	Urban	Total Polluting	1990	0	0.014545	0.403029
AGO	Angola	Sub-Saharan Africa	Urban	Total Polluting	1990	0.0189493	0.16293	0.45053
ARG	Argentina	Latin America & the Caribbean	Urban	Total Polluting	1990	0.00091	0.040965	0.171791
ARM	Armenia	Western Asia and Northern Africa	Urban	Total Polluting	1990	0.00456625	0.211445	0.7742
AZE	Azerbaijan	Western Asia and Northern Africa	Urban	Total Polluting	1990	0.00504	0.154035	0.592075
BGD	Bangladesh	Central Asia and Southern Asia	Urban	Total Polluting	1990	0.45369	0.686665	0.870931
BLR	Belarus	Northern America and Europe	Urban	Total Polluting	1990	0	0.019305	0.432469
BLZ	Belize	Latin America & the Caribbean	Urban	Total Polluting	1990	0.0486765	0.137485	0.265465
BEN	Benin	Sub-Saharan Africa	Urban	Total Polluting	1990	0.955001	0.99918	1
BTN	Bhutan	Central Asia and Southern Asia	Urban	Total Polluting	1990	0.022149	0.316915	0.884919
BOL	Bolivia (Plurinational State of)	Latin America & the Caribbean	Urban	Total Polluting	1990	0.068338	0.147785	0.251411
BIH	Bosnia and Herzegovina	Northern America and Europe	Urban	Total Polluting	1990	0.00159875	0.142375	0.777072
BWA	Botswana	Sub-Saharan Africa	Urban	Total Polluting	1990	0.138143	0.423975	0.792564
BRA	Brazil	Latin America & the Caribbean	Urban	Total Polluting	1990	0.0114363	0.08968	0.233717
BFA	Burkina Faso	Sub-Saharan Africa	Urban	Total Polluting	1990	0.666983	0.91653	0.991221
BDI	Burundi	Sub-Saharan Africa	Urban	Total Polluting	1990	0.760587	0.99822	1
CPV	Cabo Verde	Sub-Saharan Africa	Urban	Total Polluting	1990	0.003079	0.068415	0.332828
KHM	Cambodia	Eastern Asia and South-eastern Asia	Urban	Total Polluting	1990	0.808435	0.95906	0.99776
CMR	Cameroon	Sub-Saharan Africa	Urban	Total Polluting	1990	0.625144	0.908195	0.990023
CAF	Central African Republic	Sub-Saharan Africa	Urban	Total Polluting	1990	0.442762	0.967425	1
TCD	Chad	Sub-Saharan Africa	Urban	Total Polluting	1990	0.442383	0.940185	0.99998
CHN	China	Eastern Asia and South-eastern Asia	Urban	Total Polluting	1990	0.037295	0.329645	0.803733
COL	Colombia	Latin America & the Caribbean	Urban	Total Polluting	1990	0.11736	0.201665	0.306011
COM	Comoros	Sub-Saharan Africa	Urban	Total Polluting	1990	0.965339	0.99946	1
COG	Congo	Sub-Saharan Africa	Urban	Total Polluting	1990	0.343317	0.87246	0.996701
COK	Cook Islands	Oceania excluding Australia and New Zealand	Urban	Total Polluting	1990	0	0.045315	0.621684
CRI	Costa Rica	Latin America & the Caribbean	Urban	Total Polluting	1990	3e-05	0.032395	0.259464
CIV	Côte d'Ivoire	Sub-Saharan Africa	Urban	Total Polluting	1990	0.0677617	0.4788	0.949874
PRK	Democratic Peoples Republic of Korea	Eastern Asia and South-eastern Asia	Urban	Total Polluting	1990	0.615363	0.98976	1
COD	Democratic Republic of the Congo	Sub-Saharan Africa	Urban	Total Polluting	1990	0.246929	0.892445	0.99998
DJI	Djibouti	Sub-Saharan Africa	Urban	Total Polluting	1990	0.801679	0.95714	0.99924
DMA	Dominica	Latin America & the Caribbean	Urban	Total Polluting	1990	0	0.03296	0.75702
DOM	Dominican Republic	Latin America & the Caribbean	Urban	Total Polluting	1990	0.102289	0.21414	0.340824
ECU	Ecuador	Latin America & the Caribbean	Urban	Total Polluting	1990	0.00026975	0.037585	0.276182
EGY	Egypt	Western Asia and Northern Africa	Urban	Total Polluting	1990	0.0045185	0.110015	0.532189
SLV	El Salvador	Latin America & the Caribbean	Urban	Total Polluting	1990	0.038807	0.39432	0.851109
GNQ	Equatorial Guinea	Sub-Saharan Africa	Urban	Total Polluting	1990	0.0744148	0.75167	0.999701
ERI	Eritrea	Sub-Saharan Africa	Urban	Total Polluting	1990	0.828527	0.95945	0.99798
ETH	Ethiopia	Sub-Saharan Africa	Urban	Total Polluting	1990	0.800814	0.97369	1
FJI	Fiji	Oceania excluding Australia and New Zealand	Urban	Total Polluting	1990	0.14286	0.49343	0.889034
GAB	Gabon	Sub-Saharan Africa	Urban	Total Polluting	1990	0.0345722	0.29693	0.748405
GMB	Gambia	Sub-Saharan Africa	Urban	Total Polluting	1990	0.829206	0.972495	1
GEO	Georgia	Western Asia and Northern Africa	Urban	Total Polluting	1990	0.00393975	0.19207	0.794969
GHA	Ghana	Sub-Saharan Africa	Urban	Total Polluting	1990	0.857308	0.927445	0.97326
GRD	Grenada	Latin America & the Caribbean	Urban	Total Polluting	1990	0.0001795	0.07057	0.530637
GTM	Guatemala	Latin America & the Caribbean	Urban	Total Polluting	1990	0.0499653	0.292945	0.696988
GIN	Guinea	Sub-Saharan Africa	Urban	Total Polluting	1990	0.836715	0.975	0.99989
GNB	Guinea-Bissau	Sub-Saharan Africa	Urban	Total Polluting	1990	0.66431	0.93099	0.99969
GUY	Guyana	Latin America & the Caribbean	Urban	Total Polluting	1990	0.167168	0.571325	0.916797
HTI	Haiti	Latin America & the Caribbean	Urban	Total Polluting	1990	0.69685	0.9602	0.99924
HND	Honduras	Latin America & the Caribbean	Urban	Total Polluting	1990	0.225149	0.64447	0.941383
IND	India	Central Asia and Southern Asia	Urban	Total Polluting	1990	0.580312	0.70266	0.806725
IDN	Indonesia	Eastern Asia and South-eastern Asia	Urban	Total Polluting	1990	0.758876	0.901495	0.98082
IRN	Iran (Islamic Republic of)	Central Asia and Southern Asia	Urban	Total Polluting	1990	0	0.038265	0.615389
IRQ	Iraq	Western Asia and Northern Africa	Urban	Total Polluting	1990	0.00483975	0.230325	0.88952
JAM	Jamaica	Latin America & the Caribbean	Urban	Total Polluting	1990	0	0.06332	0.524227
JOR	Jordan	Western Asia and Northern Africa	Urban	Total Polluting	1990	0	0.00291	0.085373
KAZ	Kazakhstan	Central Asia and Southern Asia	Urban	Total Polluting	1990	0.0002795	0.04701	0.34587
KEN	Kenya	Sub-Saharan Africa	Urban	Total Polluting	1990	0.874537	0.9989	1
KIR	Kiribati	Oceania excluding Australia and New Zealand	Urban	Total Polluting	1990	0.309572	0.94985	1
KGZ	Kyrgyzstan	Central Asia and Southern Asia	Urban	Total Polluting	1990	0.002149	0.221905	0.896555
LAO	Lao People's Democratic Republic	Eastern Asia and South-eastern Asia	Urban	Total Polluting	1990	0.478069	0.762585	0.937724
LSO	Lesotho	Sub-Saharan Africa	Urban	Total Polluting	1990	0.458698	0.796175	0.96189
LBR	Liberia	Sub-Saharan Africa	Urban	Total Polluting	1990	0.653223	0.989905	1
MDG	Madagascar	Sub-Saharan Africa	Urban	Total Polluting	1990	0.888258	0.967195	0.99779
MWI	Malawi	Sub-Saharan Africa	Urban	Total Polluting	1990	0.611678	0.875405	0.980492
MYS	Malaysia	Eastern Asia and South-eastern Asia	Urban	Total Polluting	1990	0	0.010705	0.246395
MDV	Maldives	Central Asia and Southern Asia	Urban	Total Polluting	1990	0	0.032495	0.949002
MLI	Mali	Sub-Saharan Africa	Urban	Total Polluting	1990	0.855875	0.98785	1
MHL	Marshall Islands	Oceania excluding Australia and New Zealand	Urban	Total Polluting	1990	0.26646	0.920635	1
MRT	Mauritania	Sub-Saharan Africa	Urban	Total Polluting	1990	0.416451	0.73056	0.917717
MEX	Mexico	Latin America & the Caribbean	Urban	Total Polluting	1990	0	0.00828	0.101112
FSM	Micronesia, Federated States of	Oceania excluding Australia and New Zealand	Urban	Total Polluting	1990	0.00137	0.938535	1
MNG	Mongolia	Eastern Asia and South-eastern Asia	Urban	Total Polluting	1990	0.121522	0.489085	0.880246
MNE	Montenegro	Northern America and Europe	Urban	Total Polluting	1990	0.00219	0.16306	0.785443
MAR	Morocco	Western Asia and Northern Africa	Urban	Total Polluting	1990	0	0.01163	0.210885
MOZ	Mozambique	Sub-Saharan Africa	Urban	Total Polluting	1990	0.464708	0.930715	0.99988
MMR	Myanmar	Eastern Asia and South-eastern Asia	Urban	Total Polluting	1990	0.51804	0.964765	1
NAM	Namibia	Sub-Saharan Africa	Urban	Total Polluting	1990	0.00888825	0.11414	0.436844
NPL	Nepal	Central Asia and Southern Asia	Urban	Total Polluting	1990	0.811311	0.9811	0.99974
NIC	Nicaragua	Latin America & the Caribbean	Urban	Total Polluting	1990	0.463274	0.663915	0.817282
NER	Niger	Sub-Saharan Africa	Urban	Total Polluting	1990	0.827628	0.961305	0.998722
NGA	Nigeria	Sub-Saharan Africa	Urban	Total Polluting	1990	0.637132	0.945165	0.998291
NIU	Niue	Oceania excluding Australia and New Zealand	Urban	Total Polluting	1990	0	0.12252	0.827996
PAK	Pakistan	Central Asia and Southern Asia	Urban	Total Polluting	1990	0.139819	0.458865	0.815219
PNG	Papua New Guinea	Oceania excluding Australia and New Zealand	Urban	Total Polluting	1990	0.227654	0.769365	0.994911
PRY	Paraguay	Latin America & the Caribbean	Urban	Total Polluting	1990	0.149118	0.28129	0.429727
PER	Peru	Latin America & the Caribbean	Urban	Total Polluting	1990	0.307186	0.65875	0.901787
PHL	Philippines	Eastern Asia and South-eastern Asia	Urban	Total Polluting	1990	0.463823	0.630645	0.777033
MDA	Moldova, Republic of	Northern America and Europe	Urban	Total Polluting	1990	0.0004695	0.10315	0.584714
RUS	Russian Federation	Northern America and Europe	Urban	Total Polluting	1990	0	0.00033	0.049164
RWA	Rwanda	Sub-Saharan Africa	Urban	Total Polluting	1990	0.722977	0.967295	1
LCA	Saint Lucia	Latin America & the Caribbean	Urban	Total Polluting	1990	0.00032	0.53042	0.962405
VCT	Saint Vincent and the Grenadines	Latin America & the Caribbean	Urban	Total Polluting	1990	0	0.034	0.297649
WSM	Samoa	Oceania excluding Australia and New Zealand	Urban	Total Polluting	1990	0.0717778	0.609875	0.988532
STP	Sao Tome And Principe	Sub-Saharan Africa	Urban	Total Polluting	1990	0.803391	0.998285	1
SEN	Senegal	Sub-Saharan Africa	Urban	Total Polluting	1990	0.430147	0.65872	0.833471
SRB	Serbia	Northern America and Europe	Urban	Total Polluting	1990	0.00287925	0.17301	0.80605
SLE	Sierra Leone	Sub-Saharan Africa	Urban	Total Polluting	1990	0.36701	0.97592	1
SLB	Solomon Islands	Oceania excluding Australia and New Zealand	Urban	Total Polluting	1990	0.0565032	0.598945	0.981218
SOM	Somalia	Sub-Saharan Africa	Urban	Total Polluting	1990	0.93357	0.99936	1
ZAF	South Africa	Sub-Saharan Africa	Urban	Total Polluting	1990	0.122771	0.296755	0.523435
SSD	South Sudan	Sub-Saharan Africa	Urban	Total Polluting	1990	0.29333	0.988205	1
LKA	Sri Lanka	Central Asia and Southern Asia	Urban	Total Polluting	1990	0.051025	0.36231	0.866477
SDN	Sudan	Western Asia and Northern Africa	Urban	Total Polluting	1990	0.51861	0.91157	0.996991
SUR	Suriname	Latin America & the Caribbean	Urban	Total Polluting	1990	0.0028785	0.158185	0.790237
SWZ	Eswatini	Sub-Saharan Africa	Urban	Total Polluting	1990	0.311368	0.556375	0.777449
SYR	Syrian Arab Republic	Western Asia and Northern Africa	Urban	Total Polluting	1990	0	0.013645	0.294778
TJK	Tajikistan	Central Asia and Southern Asia	Urban	Total Polluting	1990	0.020656	0.289345	0.791251
THA	Thailand	Eastern Asia and South-eastern Asia	Urban	Total Polluting	1990	0.0500353	0.174725	0.354843
MKD	North Macedonia	Northern America and Europe	Urban	Total Polluting	1990	0.0190557	0.44014	0.958108
TLS	Timor-Leste	Eastern Asia and South-eastern Asia	Urban	Total Polluting	1990	0.50415	0.97132	1
TGO	Togo	Sub-Saharan Africa	Urban	Total Polluting	1990	0.925842	0.998175	1
TON	Tonga	Oceania excluding Australia and New Zealand	Urban	Total Polluting	1990	0.0024585	0.177205	0.822813
TUN	Tunisia	Western Asia and Northern Africa	Urban	Total Polluting	1990	9e-05	0.06864	0.620181
TUR	Turkey	Western Asia and Northern Africa	Urban	Total Polluting	1990	2e-05	0.035565	0.591897
TKM	Turkmenistan	Central Asia and Southern Asia	Urban	Total Polluting	1990	0	0.000765	0.062593
TUV	Tuvalu	Oceania excluding Australia and New Zealand	Urban	Total Polluting	1990	0.00637225	0.84728	1
UGA	Uganda	Sub-Saharan Africa	Urban	Total Polluting	1990	0.776954	0.938655	0.997101
UKR	Ukraine	Northern America and Europe	Urban	Total Polluting	1990	0.0007795	0.075535	0.530955
TZA	Tanzania, United Republic of	Sub-Saharan Africa	Urban	Total Polluting	1990	0.970818	0.99939	1
UZB	Uzbekistan	Central Asia and Southern Asia	Urban	Total Polluting	1990	0	0.022625	0.388613
VUT	Vanuatu	Oceania excluding Australia and New Zealand	Urban	Total Polluting	1990	0.0272478	0.41088	0.95538
VEN	Venezuela (Bolivarian Republic of)	Latin America & the Caribbean	Urban	Total Polluting	1990	0	0.012595	0.210564
VNM	Viet Nam	Eastern Asia and South-eastern Asia	Urban	Total Polluting	1990	0.943096	0.98096	0.99649
YEM	Yemen	Western Asia and Northern Africa	Urban	Total Polluting	1990	0.0010695	0.11592	0.746367
ZMB	Zambia	Sub-Saharan Africa	Urban	Total Polluting	1990	0.595166	0.716235	0.821756
ZWE	Zimbabwe	Sub-Saharan Africa	Urban	Total Polluting	1990	0.003798	0.072305	0.536813
AFG	Afghanistan	Central Asia and Southern Asia	Urban	Total Clean	1990	0.0145227	0.372435	0.9479
ALB	Albania	Northern America and Europe	Urban	Total Clean	1990	0.0405423	0.51743	0.971909
DZA	Algeria	Western Asia and Northern Africa	Urban	Total Clean	1990	0.59697	0.985455	1
AGO	Angola	Sub-Saharan Africa	Urban	Total Clean	1990	0.54947	0.83707	0.981051
ARG	Argentina	Latin America & the Caribbean	Urban	Total Clean	1990	0.82821	0.959035	0.99909
ARM	Armenia	Western Asia and Northern Africa	Urban	Total Clean	1990	0.2258	0.788555	0.995434
AZE	Azerbaijan	Western Asia and Northern Africa	Urban	Total Clean	1990	0.407925	0.845965	0.99496
BGD	Bangladesh	Central Asia and Southern Asia	Urban	Total Clean	1990	0.129069	0.313335	0.546311
BLR	Belarus	Northern America and Europe	Urban	Total Clean	1990	0.567531	0.980695	1
BLZ	Belize	Latin America & the Caribbean	Urban	Total Clean	1990	0.734535	0.862515	0.951323
BEN	Benin	Sub-Saharan Africa	Urban	Total Clean	1990	0	0.00082	0.0449988
BTN	Bhutan	Central Asia and Southern Asia	Urban	Total Clean	1990	0.115081	0.683085	0.977851
BOL	Bolivia (Plurinational State of)	Latin America & the Caribbean	Urban	Total Clean	1990	0.748589	0.852215	0.931662
BIH	Bosnia and Herzegovina	Northern America and Europe	Urban	Total Clean	1990	0.222929	0.857625	0.998401
BWA	Botswana	Sub-Saharan Africa	Urban	Total Clean	1990	0.207436	0.576025	0.861858
BRA	Brazil	Latin America & the Caribbean	Urban	Total Clean	1990	0.766283	0.91032	0.988564
BFA	Burkina Faso	Sub-Saharan Africa	Urban	Total Clean	1990	0.00877875	0.08347	0.333017
BDI	Burundi	Sub-Saharan Africa	Urban	Total Clean	1990	0	0.00178	0.239413
CPV	Cabo Verde	Sub-Saharan Africa	Urban	Total Clean	1990	0.667172	0.931585	0.996921
KHM	Cambodia	Eastern Asia and South-eastern Asia	Urban	Total Clean	1990	0.00224	0.04094	0.191565
CMR	Cameroon	Sub-Saharan Africa	Urban	Total Clean	1990	0.00997675	0.091805	0.374856
CAF	Central African Republic	Sub-Saharan Africa	Urban	Total Clean	1990	0	0.032575	0.557238
TCD	Chad	Sub-Saharan Africa	Urban	Total Clean	1990	2e-05	0.059815	0.557617
CHN	China	Eastern Asia and South-eastern Asia	Urban	Total Clean	1990	0.196267	0.670355	0.962705
COL	Colombia	Latin America & the Caribbean	Urban	Total Clean	1990	0.69399	0.798335	0.882641
COM	Comoros	Sub-Saharan Africa	Urban	Total Clean	1990	0	0.00054	0.034661
COG	Congo	Sub-Saharan Africa	Urban	Total Clean	1990	0.003299	0.12754	0.656683
COK	Cook Islands	Oceania excluding Australia and New Zealand	Urban	Total Clean	1990	0.378316	0.954685	1
CRI	Costa Rica	Latin America & the Caribbean	Urban	Total Clean	1990	0.740536	0.967605	0.99997
CIV	Côte d'Ivoire	Sub-Saharan Africa	Urban	Total Clean	1990	0.0501255	0.5212	0.932238
PRK	Democratic Peoples Republic of Korea	Eastern Asia and South-eastern Asia	Urban	Total Clean	1990	0	0.01024	0.384638
COD	Democratic Republic of the Congo	Sub-Saharan Africa	Urban	Total Clean	1990	2e-05	0.107555	0.75307
DJI	Djibouti	Sub-Saharan Africa	Urban	Total Clean	1990	0.0007595	0.04286	0.198321
DMA	Dominica	Latin America & the Caribbean	Urban	Total Clean	1990	0.24298	0.96704	1
DOM	Dominican Republic	Latin America & the Caribbean	Urban	Total Clean	1990	0.659176	0.78586	0.897711
ECU	Ecuador	Latin America & the Caribbean	Urban	Total Clean	1990	0.723818	0.962415	0.99973
EGY	Egypt	Western Asia and Northern Africa	Urban	Total Clean	1990	0.467811	0.889985	0.995482
SLV	El Salvador	Latin America & the Caribbean	Urban	Total Clean	1990	0.148891	0.60568	0.961193
GNQ	Equatorial Guinea	Sub-Saharan Africa	Urban	Total Clean	1990	0.00029875	0.24833	0.925585
ERI	Eritrea	Sub-Saharan Africa	Urban	Total Clean	1990	0.00202	0.04055	0.171472
ETH	Ethiopia	Sub-Saharan Africa	Urban	Total Clean	1990	0	0.02631	0.199186
FJI	Fiji	Oceania excluding Australia and New Zealand	Urban	Total Clean	1990	0.110966	0.50657	0.85714
GAB	Gabon	Sub-Saharan Africa	Urban	Total Clean	1990	0.251595	0.70307	0.965428
GMB	Gambia	Sub-Saharan Africa	Urban	Total Clean	1990	0	0.027505	0.170793
GEO	Georgia	Western Asia and Northern Africa	Urban	Total Clean	1990	0.205031	0.80793	0.99606
GHA	Ghana	Sub-Saharan Africa	Urban	Total Clean	1990	0.02674	0.072555	0.142692
GRD	Grenada	Latin America & the Caribbean	Urban	Total Clean	1990	0.469363	0.92943	0.999821
GTM	Guatemala	Latin America & the Caribbean	Urban	Total Clean	1990	0.303012	0.707055	0.950035
GIN	Guinea	Sub-Saharan Africa	Urban	Total Clean	1990	0.00011	0.025	0.163285
GNB	Guinea-Bissau	Sub-Saharan Africa	Urban	Total Clean	1990	0.00031	0.06901	0.33569
GUY	Guyana	Latin America & the Caribbean	Urban	Total Clean	1990	0.0832033	0.428675	0.832831
HTI	Haiti	Latin America & the Caribbean	Urban	Total Clean	1990	0.0007595	0.0398	0.30315
HND	Honduras	Latin America & the Caribbean	Urban	Total Clean	1990	0.058617	0.35553	0.774851
IND	India	Central Asia and Southern Asia	Urban	Total Clean	1990	0.193275	0.29734	0.419688
IDN	Indonesia	Eastern Asia and South-eastern Asia	Urban	Total Clean	1990	0.0191797	0.098505	0.241124
IRN	Iran (Islamic Republic of)	Central Asia and Southern Asia	Urban	Total Clean	1990	0.384611	0.961735	1
IRQ	Iraq	Western Asia and Northern Africa	Urban	Total Clean	1990	0.11048	0.769675	0.99516
JAM	Jamaica	Latin America & the Caribbean	Urban	Total Clean	1990	0.475774	0.93668	1
JOR	Jordan	Western Asia and Northern Africa	Urban	Total Clean	1990	0.914627	0.99709	1
KAZ	Kazakhstan	Central Asia and Southern Asia	Urban	Total Clean	1990	0.65413	0.95299	0.999721
KEN	Kenya	Sub-Saharan Africa	Urban	Total Clean	1990	0	0.0011	0.125464
KIR	Kiribati	Oceania excluding Australia and New Zealand	Urban	Total Clean	1990	0	0.05015	0.690428
KGZ	Kyrgyzstan	Central Asia and Southern Asia	Urban	Total Clean	1990	0.103445	0.778095	0.997851
LAO	Lao People's Democratic Republic	Eastern Asia and South-eastern Asia	Urban	Total Clean	1990	0.0622762	0.237415	0.521931
LSO	Lesotho	Sub-Saharan Africa	Urban	Total Clean	1990	0.0381098	0.203825	0.541302
LBR	Liberia	Sub-Saharan Africa	Urban	Total Clean	1990	0	0.010095	0.346776
MDG	Madagascar	Sub-Saharan Africa	Urban	Total Clean	1990	0.00221	0.032805	0.111742
MWI	Malawi	Sub-Saharan Africa	Urban	Total Clean	1990	0.0195078	0.124595	0.388322
MYS	Malaysia	Eastern Asia and South-eastern Asia	Urban	Total Clean	1990	0.753605	0.989295	1
MDV	Maldives	Central Asia and Southern Asia	Urban	Total Clean	1990	0.0509975	0.967505	1
MLI	Mali	Sub-Saharan Africa	Urban	Total Clean	1990	0	0.01215	0.144125
MHL	Marshall Islands	Oceania excluding Australia and New Zealand	Urban	Total Clean	1990	0	0.079365	0.73354
MRT	Mauritania	Sub-Saharan Africa	Urban	Total Clean	1990	0.0822832	0.26944	0.583549
MEX	Mexico	Latin America & the Caribbean	Urban	Total Clean	1990	0.898888	0.99172	1
FSM	Micronesia, Federated States of	Oceania excluding Australia and New Zealand	Urban	Total Clean	1990	0	0.061465	0.99863
MNG	Mongolia	Eastern Asia and South-eastern Asia	Urban	Total Clean	1990	0.119754	0.510915	0.878479
MNE	Montenegro	Northern America and Europe	Urban	Total Clean	1990	0.214557	0.83694	0.99781
MAR	Morocco	Western Asia and Northern Africa	Urban	Total Clean	1990	0.789115	0.98837	1
MOZ	Mozambique	Sub-Saharan Africa	Urban	Total Clean	1990	0.00012	0.069285	0.535292
MMR	Myanmar	Eastern Asia and South-eastern Asia	Urban	Total Clean	1990	0	0.035235	0.48196
NAM	Namibia	Sub-Saharan Africa	Urban	Total Clean	1990	0.563156	0.88586	0.991112
NPL	Nepal	Central Asia and Southern Asia	Urban	Total Clean	1990	0.00025975	0.0189	0.18869
NIC	Nicaragua	Latin America & the Caribbean	Urban	Total Clean	1990	0.182718	0.336085	0.536726
NER	Niger	Sub-Saharan Africa	Urban	Total Clean	1990	0.0012785	0.038695	0.172372
NGA	Nigeria	Sub-Saharan Africa	Urban	Total Clean	1990	0.001709	0.054835	0.362868
NIU	Niue	Oceania excluding Australia and New Zealand	Urban	Total Clean	1990	0.172004	0.87748	1
PAK	Pakistan	Central Asia and Southern Asia	Urban	Total Clean	1990	0.184781	0.541135	0.860181
PNG	Papua New Guinea	Oceania excluding Australia and New Zealand	Urban	Total Clean	1990	0.00508875	0.230635	0.772346
PRY	Paraguay	Latin America & the Caribbean	Urban	Total Clean	1990	0.570273	0.71871	0.850881
PER	Peru	Latin America & the Caribbean	Urban	Total Clean	1990	0.0982135	0.34125	0.692813
PHL	Philippines	Eastern Asia and South-eastern Asia	Urban	Total Clean	1990	0.222967	0.369355	0.536177
MDA	Moldova, Republic of	Northern America and Europe	Urban	Total Clean	1990	0.415286	0.89685	0.99953
RUS	Russian Federation	Northern America and Europe	Urban	Total Clean	1990	0.950836	0.99967	1
RWA	Rwanda	Sub-Saharan Africa	Urban	Total Clean	1990	0	0.032705	0.277023
LCA	Saint Lucia	Latin America & the Caribbean	Urban	Total Clean	1990	0.037595	0.46958	0.99968
VCT	Saint Vincent and the Grenadines	Latin America & the Caribbean	Urban	Total Clean	1990	0.702351	0.966	1
WSM	Samoa	Oceania excluding Australia and New Zealand	Urban	Total Clean	1990	0.0114685	0.390125	0.928222
STP	Sao Tome And Principe	Sub-Saharan Africa	Urban	Total Clean	1990	0	0.001715	0.196609
SEN	Senegal	Sub-Saharan Africa	Urban	Total Clean	1990	0.166529	0.34128	0.569853
SRB	Serbia	Northern America and Europe	Urban	Total Clean	1990	0.19395	0.82699	0.997121
SLE	Sierra Leone	Sub-Saharan Africa	Urban	Total Clean	1990	0	0.02408	0.63299
SLB	Solomon Islands	Oceania excluding Australia and New Zealand	Urban	Total Clean	1990	0.0187823	0.401055	0.943497
SOM	Somalia	Sub-Saharan Africa	Urban	Total Clean	1990	0	0.00064	0.0664303
ZAF	South Africa	Sub-Saharan Africa	Urban	Total Clean	1990	0.476565	0.703245	0.877229
SSD	South Sudan	Sub-Saharan Africa	Urban	Total Clean	1990	0	0.011795	0.70667
LKA	Sri Lanka	Central Asia and Southern Asia	Urban	Total Clean	1990	0.133523	0.63769	0.948975
SDN	Sudan	Western Asia and Northern Africa	Urban	Total Clean	1990	0.003009	0.08843	0.48139
SUR	Suriname	Latin America & the Caribbean	Urban	Total Clean	1990	0.209763	0.841815	0.997121
SWZ	Eswatini	Sub-Saharan Africa	Urban	Total Clean	1990	0.222551	0.443625	0.688632
SYR	Syrian Arab Republic	Western Asia and Northern Africa	Urban	Total Clean	1990	0.705221	0.986355	1
TJK	Tajikistan	Central Asia and Southern Asia	Urban	Total Clean	1990	0.208749	0.710655	0.979344
THA	Thailand	Eastern Asia and South-eastern Asia	Urban	Total Clean	1990	0.645158	0.825275	0.949965
MKD	North Macedonia	Northern America and Europe	Urban	Total Clean	1990	0.0418925	0.55986	0.980944
TLS	Timor-Leste	Eastern Asia and South-eastern Asia	Urban	Total Clean	1990	0	0.02868	0.495849
TGO	Togo	Sub-Saharan Africa	Urban	Total Clean	1990	0	0.001825	0.0741582
TON	Tonga	Oceania excluding Australia and New Zealand	Urban	Total Clean	1990	0.177187	0.822795	0.997541
TUN	Tunisia	Western Asia and Northern Africa	Urban	Total Clean	1990	0.379819	0.93136	0.99991
TUR	Turkey	Western Asia and Northern Africa	Urban	Total Clean	1990	0.408104	0.964435	0.99998
TKM	Turkmenistan	Central Asia and Southern Asia	Urban	Total Clean	1990	0.937407	0.999235	1
TUV	Tuvalu	Oceania excluding Australia and New Zealand	Urban	Total Clean	1990	0	0.15272	0.993628
UGA	Uganda	Sub-Saharan Africa	Urban	Total Clean	1990	0.002899	0.061345	0.223046
UKR	Ukraine	Northern America and Europe	Urban	Total Clean	1990	0.469045	0.924465	0.99922
TZA	Tanzania, United Republic of	Sub-Saharan Africa	Urban	Total Clean	1990	0	0.00061	0.029182
UZB	Uzbekistan	Central Asia and Southern Asia	Urban	Total Clean	1990	0.611387	0.977375	1
VUT	Vanuatu	Oceania excluding Australia and New Zealand	Urban	Total Clean	1990	0.04462	0.58912	0.972752
VEN	Venezuela (Bolivarian Republic of)	Latin America & the Caribbean	Urban	Total Clean	1990	0.789436	0.987405	1
VNM	Viet Nam	Eastern Asia and South-eastern Asia	Urban	Total Clean	1990	0.00351	0.01904	0.0569038
YEM	Yemen	Western Asia and Northern Africa	Urban	Total Clean	1990	0.253633	0.88408	0.998931
ZMB	Zambia	Sub-Saharan Africa	Urban	Total Clean	1990	0.178244	0.283765	0.404834
ZWE	Zimbabwe	Sub-Saharan Africa	Urban	Total Clean	1990	0.463187	0.927695	0.996202
AFG	Afghanistan	Central Asia and Southern Asia	Rural	Kerosene	1990	0	6e-05	0.0361322
ALB	Albania	Northern America and Europe	Rural	Kerosene	1990	0	0	0.0141615
DZA	Algeria	Western Asia and Northern Africa	Rural	Kerosene	1990	0	5e-05	0.0963283
AGO	Angola	Sub-Saharan Africa	Rural	Kerosene	1990	0	7e-05	0.0679208
ARG	Argentina	Latin America & the Caribbean	Rural	Kerosene	1990	0	0.00427	0.06068
ARM	Armenia	Western Asia and Northern Africa	Rural	Kerosene	1990	0	0.002145	0.0957525
AZE	Azerbaijan	Western Asia and Northern Africa	Rural	Kerosene	1990	0	0.01375	0.179953
BGD	Bangladesh	Central Asia and Southern Asia	Rural	Kerosene	1990	0	0.003515	0.0891905
BLR	Belarus	Northern America and Europe	Rural	Kerosene	1990	0	4e-05	0.0881828
BLZ	Belize	Latin America & the Caribbean	Rural	Kerosene	1990	0.0031875	0.02739	0.0825508
BEN	Benin	Sub-Saharan Africa	Rural	Kerosene	1990	0	0.01166	0.111412
BTN	Bhutan	Central Asia and Southern Asia	Rural	Kerosene	1990	0	0.01251	0.180202
BOL	Bolivia (Plurinational State of)	Latin America & the Caribbean	Rural	Kerosene	1990	0.00121925	0.00849	0.0305205
BIH	Bosnia and Herzegovina	Northern America and Europe	Rural	Kerosene	1990	0	0	0.02074
BWA	Botswana	Sub-Saharan Africa	Rural	Kerosene	1990	0.00028	0.0318	0.202141
BRA	Brazil	Latin America & the Caribbean	Rural	Kerosene	1990	0	0	0.0100318
BFA	Burkina Faso	Sub-Saharan Africa	Rural	Kerosene	1990	0	0.0029	0.0519205
BDI	Burundi	Sub-Saharan Africa	Rural	Kerosene	1990	0	0	0.00227025
CPV	Cabo Verde	Sub-Saharan Africa	Rural	Kerosene	1990	0	0	0.014292
KHM	Cambodia	Eastern Asia and South-eastern Asia	Rural	Kerosene	1990	0	0.00425	0.0625925
CMR	Cameroon	Sub-Saharan Africa	Rural	Kerosene	1990	0.00017	0.04585	0.328365
CAF	Central African Republic	Sub-Saharan Africa	Rural	Kerosene	1990	0	0.00025	0.109737
TCD	Chad	Sub-Saharan Africa	Rural	Kerosene	1990	0	0.000765	0.141915
CHN	China	Eastern Asia and South-eastern Asia	Rural	Kerosene	1990	0	0	0.0132727
COL	Colombia	Latin America & the Caribbean	Rural	Kerosene	1990	0.0186993	0.05233	0.112821
COM	Comoros	Sub-Saharan Africa	Rural	Kerosene	1990	0	0.02436	0.273501
COG	Congo	Sub-Saharan Africa	Rural	Kerosene	1990	0	0.0124	0.27154
COK	Cook Islands	Oceania excluding Australia and New Zealand	Rural	Kerosene	1990	0	0.02223	0.61376
CRI	Costa Rica	Latin America & the Caribbean	Rural	Kerosene	1990	0	1e-05	0.023868
CIV	Côte d'Ivoire	Sub-Saharan Africa	Rural	Kerosene	1990	0	0.00021	0.0369118
PRK	Democratic Peoples Republic of Korea	Eastern Asia and South-eastern Asia	Rural	Kerosene	1990	0	0.00449	0.2774
COD	Democratic Republic of the Congo	Sub-Saharan Africa	Rural	Kerosene	1990	0	0	0.018503
DJI	Djibouti	Sub-Saharan Africa	Rural	Kerosene	1990	0.238577	0.61773	0.896908
DMA	Dominica	Latin America & the Caribbean	Rural	Kerosene	1990	0	0.00054	0.186275
DOM	Dominican Republic	Latin America & the Caribbean	Rural	Kerosene	1990	0	0.000375	0.0100512
ECU	Ecuador	Latin America & the Caribbean	Rural	Kerosene	1990	0	0.00813	0.135091
EGY	Egypt	Western Asia and Northern Africa	Rural	Kerosene	1990	0.191031	0.613805	0.908414
SLV	El Salvador	Latin America & the Caribbean	Rural	Kerosene	1990	0	0.009455	0.140517
GNQ	Equatorial Guinea	Sub-Saharan Africa	Rural	Kerosene	1990	0	0.125775	0.869319
ERI	Eritrea	Sub-Saharan Africa	Rural	Kerosene	1990	6e-05	0.02877	0.190852
ETH	Ethiopia	Sub-Saharan Africa	Rural	Kerosene	1990	3e-05	0.034075	0.283583
FJI	Fiji	Oceania excluding Australia and New Zealand	Rural	Kerosene	1990	0.00028975	0.06894	0.444211
GAB	Gabon	Sub-Saharan Africa	Rural	Kerosene	1990	0	0.0004	0.0541008
GMB	Gambia	Sub-Saharan Africa	Rural	Kerosene	1990	0	1e-05	0.00591225
GEO	Georgia	Western Asia and Northern Africa	Rural	Kerosene	1990	0	0.001	0.079688
GHA	Ghana	Sub-Saharan Africa	Rural	Kerosene	1990	8e-05	0.006425	0.035784
GRD	Grenada	Latin America & the Caribbean	Rural	Kerosene	1990	0	0.00374	0.198987
GTM	Guatemala	Latin America & the Caribbean	Rural	Kerosene	1990	0	0	0.025502
GIN	Guinea	Sub-Saharan Africa	Rural	Kerosene	1990	0	0.017	0.130755
GNB	Guinea-Bissau	Sub-Saharan Africa	Rural	Kerosene	1990	0	0	0.00177025
GUY	Guyana	Latin America & the Caribbean	Rural	Kerosene	1990	0.28744	0.671535	0.908232
HTI	Haiti	Latin America & the Caribbean	Rural	Kerosene	1990	0	0.004	0.0835515
HND	Honduras	Latin America & the Caribbean	Rural	Kerosene	1990	0	0.031155	0.336148
IND	India	Central Asia and Southern Asia	Rural	Kerosene	1990	0.00369975	0.016775	0.0446303
IDN	Indonesia	Eastern Asia and South-eastern Asia	Rural	Kerosene	1990	0.0390895	0.11235	0.237
IRN	Iran (Islamic Republic of)	Central Asia and Southern Asia	Rural	Kerosene	1990	0	0.100425	0.787949
IRQ	Iraq	Western Asia and Northern Africa	Rural	Kerosene	1990	0.0037985	0.210335	0.804242
JAM	Jamaica	Latin America & the Caribbean	Rural	Kerosene	1990	0	0.00012	0.15805
JOR	Jordan	Western Asia and Northern Africa	Rural	Kerosene	1990	0	0.00225	0.13815
KAZ	Kazakhstan	Central Asia and Southern Asia	Rural	Kerosene	1990	0	0.00049	0.0562903
KEN	Kenya	Sub-Saharan Africa	Rural	Kerosene	1990	1e-05	0.0061	0.048128
KIR	Kiribati	Oceania excluding Australia and New Zealand	Rural	Kerosene	1990	0	0.025085	0.674512
KGZ	Kyrgyzstan	Central Asia and Southern Asia	Rural	Kerosene	1990	0	0.00013	0.041906
LAO	Lao People's Democratic Republic	Eastern Asia and South-eastern Asia	Rural	Kerosene	1990	0	0	0.00090075
LSO	Lesotho	Sub-Saharan Africa	Rural	Kerosene	1990	0.0952178	0.31806	0.605286
LBR	Liberia	Sub-Saharan Africa	Rural	Kerosene	1990	0	0.002385	0.267603
MDG	Madagascar	Sub-Saharan Africa	Rural	Kerosene	1990	0	0	0.00568125
MWI	Malawi	Sub-Saharan Africa	Rural	Kerosene	1990	0	0.00028	0.0197125
MYS	Malaysia	Eastern Asia and South-eastern Asia	Rural	Kerosene	1990	0	0.003365	0.203823
MDV	Maldives	Central Asia and Southern Asia	Rural	Kerosene	1990	0	0.01159	0.352733
MLI	Mali	Sub-Saharan Africa	Rural	Kerosene	1990	0	0.00276	0.130076
MHL	Marshall Islands	Oceania excluding Australia and New Zealand	Rural	Kerosene	1990	0	0.037135	0.631107
MRT	Mauritania	Sub-Saharan Africa	Rural	Kerosene	1990	0	3e-05	0.00450125
MEX	Mexico	Latin America & the Caribbean	Rural	Kerosene	1990	0	0.00445	0.0717032
FSM	Micronesia, Federated States of	Oceania excluding Australia and New Zealand	Rural	Kerosene	1990	0.0048695	0.214775	0.864345
MNG	Mongolia	Eastern Asia and South-eastern Asia	Rural	Kerosene	1990	0	0	0.00487
MNE	Montenegro	Northern America and Europe	Rural	Kerosene	1990	0	8e-05	0.0659013
MAR	Morocco	Western Asia and Northern Africa	Rural	Kerosene	1990	0	0.00127	0.107806
MOZ	Mozambique	Sub-Saharan Africa	Rural	Kerosene	1990	0	0	0.0065045
MMR	Myanmar	Eastern Asia and South-eastern Asia	Rural	Kerosene	1990	0	0	0.00340175
NAM	Namibia	Sub-Saharan Africa	Rural	Kerosene	1990	0	0.001635	0.021997
NPL	Nepal	Central Asia and Southern Asia	Rural	Kerosene	1990	0	0.081765	0.267764
NIC	Nicaragua	Latin America & the Caribbean	Rural	Kerosene	1990	0	0.007965	0.0645833
NER	Niger	Sub-Saharan Africa	Rural	Kerosene	1990	0	0.012995	0.106369
NGA	Nigeria	Sub-Saharan Africa	Rural	Kerosene	1990	0.00032975	0.05105	0.445232
NIU	Niue	Oceania excluding Australia and New Zealand	Rural	Kerosene	1990	0	0.06035	0.580967
PAK	Pakistan	Central Asia and Southern Asia	Rural	Kerosene	1990	0	0.024425	0.210203
PNG	Papua New Guinea	Oceania excluding Australia and New Zealand	Rural	Kerosene	1990	0	0.04114	0.284303
PRY	Paraguay	Latin America & the Caribbean	Rural	Kerosene	1990	0	1e-05	0.00807025
PER	Peru	Latin America & the Caribbean	Rural	Kerosene	1990	0.0020395	0.076895	0.376082
PHL	Philippines	Eastern Asia and South-eastern Asia	Rural	Kerosene	1990	0.0135777	0.06405	0.170946
MDA	Moldova, Republic of	Northern America and Europe	Rural	Kerosene	1990	0	0.00029	0.029161
RUS	Russian Federation	Northern America and Europe	Rural	Kerosene	1990	0	0	0.0333613
RWA	Rwanda	Sub-Saharan Africa	Rural	Kerosene	1990	0	0.0001	0.00702025
LCA	Saint Lucia	Latin America & the Caribbean	Rural	Kerosene	1990	0	0.000685	0.085661
VCT	Saint Vincent and the Grenadines	Latin America & the Caribbean	Rural	Kerosene	1990	0	0.00086	0.0812245
WSM	Samoa	Oceania excluding Australia and New Zealand	Rural	Kerosene	1990	0.00369875	0.14378	0.596374
STP	Sao Tome And Principe	Sub-Saharan Africa	Rural	Kerosene	1990	0	0.04691	0.716173
SEN	Senegal	Sub-Saharan Africa	Rural	Kerosene	1990	0	0	0.00323075
SRB	Serbia	Northern America and Europe	Rural	Kerosene	1990	0	0.00015	0.0999112
SLE	Sierra Leone	Sub-Saharan Africa	Rural	Kerosene	1990	0	0.06214	0.6192
SLB	Solomon Islands	Oceania excluding Australia and New Zealand	Rural	Kerosene	1990	0	6e-05	0.0695063
SOM	Somalia	Sub-Saharan Africa	Rural	Kerosene	1990	0	0.01162	0.274453
ZAF	South Africa	Sub-Saharan Africa	Rural	Kerosene	1990	0.074666	0.217165	0.407433
SSD	South Sudan	Sub-Saharan Africa	Rural	Kerosene	1990	0	2e-05	0.0653825
LKA	Sri Lanka	Central Asia and Southern Asia	Rural	Kerosene	1990	0.0002995	0.038195	0.33692
SDN	Sudan	Western Asia and Northern Africa	Rural	Kerosene	1990	0	1e-05	0.00517175
SUR	Suriname	Latin America & the Caribbean	Rural	Kerosene	1990	0	0.005715	0.244913
SWZ	Eswatini	Sub-Saharan Africa	Rural	Kerosene	1990	0.0006795	0.015635	0.086555
SYR	Syrian Arab Republic	Western Asia and Northern Africa	Rural	Kerosene	1990	0	0.00271	0.224526
TJK	Tajikistan	Central Asia and Southern Asia	Rural	Kerosene	1990	0	0.00076	0.027201
THA	Thailand	Eastern Asia and South-eastern Asia	Rural	Kerosene	1990	0	0.00033	0.0159807
MKD	North Macedonia	Northern America and Europe	Rural	Kerosene	1990	0	1e-05	0.153503
TLS	Timor-Leste	Eastern Asia and South-eastern Asia	Rural	Kerosene	1990	0	0.011385	0.427151
TGO	Togo	Sub-Saharan Africa	Rural	Kerosene	1990	0	0.01144	0.287649
TON	Tonga	Oceania excluding Australia and New Zealand	Rural	Kerosene	1990	0	0.024755	0.473324
TUN	Tunisia	Western Asia and Northern Africa	Rural	Kerosene	1990	0	0.03651	0.637429
TUR	Turkey	Western Asia and Northern Africa	Rural	Kerosene	1990	0	0.002685	0.296799
TKM	Turkmenistan	Central Asia and Southern Asia	Rural	Kerosene	1990	0	0	0.0462347
TUV	Tuvalu	Oceania excluding Australia and New Zealand	Rural	Kerosene	1990	0	0.37504	0.997132
UGA	Uganda	Sub-Saharan Africa	Rural	Kerosene	1990	0	0.0022	0.0460602
UKR	Ukraine	Northern America and Europe	Rural	Kerosene	1990	0	0	0.0329923
TZA	Tanzania, United Republic of	Sub-Saharan Africa	Rural	Kerosene	1990	0	0	0.00800075
UZB	Uzbekistan	Central Asia and Southern Asia	Rural	Kerosene	1990	0	0.001005	0.0930238
VUT	Vanuatu	Oceania excluding Australia and New Zealand	Rural	Kerosene	1990	0	0.024725	0.492021
VEN	Venezuela (Bolivarian Republic of)	Latin America & the Caribbean	Rural	Kerosene	1990	0	0.006275	0.233852
VNM	Viet Nam	Eastern Asia and South-eastern Asia	Rural	Kerosene	1990	0	0.00245	0.0405903
YEM	Yemen	Western Asia and Northern Africa	Rural	Kerosene	1990	0	0.024235	0.387265
ZMB	Zambia	Sub-Saharan Africa	Rural	Kerosene	1990	0	0	0.00699075
ZWE	Zimbabwe	Sub-Saharan Africa	Rural	Kerosene	1990	0	0.00076	0.0703865
AFG	Afghanistan	Central Asia and Southern Asia	Rural	Gas	1990	0	0.006135	0.241792
ALB	Albania	Northern America and Europe	Rural	Gas	1990	0	0.063485	0.628991
DZA	Algeria	Western Asia and Northern Africa	Rural	Gas	1990	0.277338	0.90631	0.99923
AGO	Angola	Sub-Saharan Africa	Rural	Gas	1990	3.975e-05	0.07575	0.634508
ARG	Argentina	Latin America & the Caribbean	Rural	Gas	1990	0.233387	0.49518	0.805519
ARM	Armenia	Western Asia and Northern Africa	Rural	Gas	1990	0.00029	0.024025	0.23237
AZE	Azerbaijan	Western Asia and Northern Africa	Rural	Gas	1990	0	0.00204	0.0471083
BGD	Bangladesh	Central Asia and Southern Asia	Rural	Gas	1990	0	0.00481	0.091204
BLR	Belarus	Northern America and Europe	Rural	Gas	1990	0.11569	0.715365	0.986752
BLZ	Belize	Latin America & the Caribbean	Rural	Gas	1990	0.256588	0.410105	0.587901
BEN	Benin	Sub-Saharan Africa	Rural	Gas	1990	0	3e-05	0.00783125
BTN	Bhutan	Central Asia and Southern Asia	Rural	Gas	1990	0	0.006075	0.119216
BOL	Bolivia (Plurinational State of)	Latin America & the Caribbean	Rural	Gas	1990	0.0440193	0.114615	0.229123
BIH	Bosnia and Herzegovina	Northern America and Europe	Rural	Gas	1990	0	0.016315	0.262719
BWA	Botswana	Sub-Saharan Africa	Rural	Gas	1990	0.001899	0.072725	0.334806
BRA	Brazil	Latin America & the Caribbean	Rural	Gas	1990	0.161539	0.34621	0.578176
BFA	Burkina Faso	Sub-Saharan Africa	Rural	Gas	1990	0	0.00445	0.0547127
BDI	Burundi	Sub-Saharan Africa	Rural	Gas	1990	0	0	0.00822325
CPV	Cabo Verde	Sub-Saharan Africa	Rural	Gas	1990	0.0842732	0.394545	0.800316
KHM	Cambodia	Eastern Asia and South-eastern Asia	Rural	Gas	1990	0	0.003	0.0601455
CMR	Cameroon	Sub-Saharan Africa	Rural	Gas	1990	2e-05	0.009265	0.116737
CAF	Central African Republic	Sub-Saharan Africa	Rural	Gas	1990	0	0	0.0128515
TCD	Chad	Sub-Saharan Africa	Rural	Gas	1990	0	0.00338	0.306649
CHN	China	Eastern Asia and South-eastern Asia	Rural	Gas	1990	0.0129718	0.266915	0.775292
COL	Colombia	Latin America & the Caribbean	Rural	Gas	1990	0.0510688	0.11448	0.205281
COM	Comoros	Sub-Saharan Africa	Rural	Gas	1990	0	0.00016	0.01331
COG	Congo	Sub-Saharan Africa	Rural	Gas	1990	0	0.00374	0.141692
COK	Cook Islands	Oceania excluding Australia and New Zealand	Rural	Gas	1990	0	0.137605	0.993782
CRI	Costa Rica	Latin America & the Caribbean	Rural	Gas	1990	0.087952	0.373825	0.749384
CIV	Côte d'Ivoire	Sub-Saharan Africa	Rural	Gas	1990	0	0.01635	0.307162
PRK	Democratic Peoples Republic of Korea	Eastern Asia and South-eastern Asia	Rural	Gas	1990	0	0.00427	0.269491
COD	Democratic Republic of the Congo	Sub-Saharan Africa	Rural	Gas	1990	0	0.000265	0.153067
DJI	Djibouti	Sub-Saharan Africa	Rural	Gas	1990	0	0.002085	0.0786017
DMA	Dominica	Latin America & the Caribbean	Rural	Gas	1990	0	0.15566	0.989275
DOM	Dominican Republic	Latin America & the Caribbean	Rural	Gas	1990	0.0928558	0.208865	0.379373
ECU	Ecuador	Latin America & the Caribbean	Rural	Gas	1990	0.134161	0.43468	0.783146
EGY	Egypt	Western Asia and Northern Africa	Rural	Gas	1990	0.0513183	0.28808	0.7328
SLV	El Salvador	Latin America & the Caribbean	Rural	Gas	1990	0.00117725	0.118855	0.510816
GNQ	Equatorial Guinea	Sub-Saharan Africa	Rural	Gas	1990	0	0.025405	0.579719
ERI	Eritrea	Sub-Saharan Africa	Rural	Gas	1990	0	0.00282	0.045651
ETH	Ethiopia	Sub-Saharan Africa	Rural	Gas	1990	0	0	0.0388875
FJI	Fiji	Oceania excluding Australia and New Zealand	Rural	Gas	1990	0.00019975	0.05724	0.41938
GAB	Gabon	Sub-Saharan Africa	Rural	Gas	1990	0.00138925	0.10085	0.519415
GMB	Gambia	Sub-Saharan Africa	Rural	Gas	1990	0	0.00154	0.111118
GEO	Georgia	Western Asia and Northern Africa	Rural	Gas	1990	0	0.018325	0.35022
GHA	Ghana	Sub-Saharan Africa	Rural	Gas	1990	3e-05	0.00291	0.0195003
GRD	Grenada	Latin America & the Caribbean	Rural	Gas	1990	0.24548	0.82538	0.993032
GTM	Guatemala	Latin America & the Caribbean	Rural	Gas	1990	0.0311183	0.2494	0.657477
GIN	Guinea	Sub-Saharan Africa	Rural	Gas	1990	0	4e-05	0.00975
GNB	Guinea-Bissau	Sub-Saharan Africa	Rural	Gas	1990	0	0.00013	0.0512348
GUY	Guyana	Latin America & the Caribbean	Rural	Gas	1990	0.0177585	0.14012	0.482172
HTI	Haiti	Latin America & the Caribbean	Rural	Gas	1990	0	0.00345	0.0797827
HND	Honduras	Latin America & the Caribbean	Rural	Gas	1990	0	0.027855	0.29537
IND	India	Central Asia and Southern Asia	Rural	Gas	1990	0.00458	0.02009	0.0525398
IDN	Indonesia	Eastern Asia and South-eastern Asia	Rural	Gas	1990	3e-05	0.00252	0.0149403
IRN	Iran (Islamic Republic of)	Central Asia and Southern Asia	Rural	Gas	1990	0.1124	0.747975	0.99138
IRQ	Iraq	Western Asia and Northern Africa	Rural	Gas	1990	0.0112485	0.27804	0.85519
JAM	Jamaica	Latin America & the Caribbean	Rural	Gas	1990	0.01854	0.199025	0.579041
JOR	Jordan	Western Asia and Northern Africa	Rural	Gas	1990	0.78221	0.97923	0.99989
KAZ	Kazakhstan	Central Asia and Southern Asia	Rural	Gas	1990	0.067916	0.52396	0.920188
KEN	Kenya	Sub-Saharan Africa	Rural	Gas	1990	0	0.001	0.01455
KIR	Kiribati	Oceania excluding Australia and New Zealand	Rural	Gas	1990	0	0.00025	0.093516
KGZ	Kyrgyzstan	Central Asia and Southern Asia	Rural	Gas	1990	0.00085975	0.07284	0.523409
LAO	Lao People's Democratic Republic	Eastern Asia and South-eastern Asia	Rural	Gas	1990	0	0	0.00218
LSO	Lesotho	Sub-Saharan Africa	Rural	Gas	1990	0.00248875	0.03106	0.143962
LBR	Liberia	Sub-Saharan Africa	Rural	Gas	1990	0	1e-05	0.0653757
MDG	Madagascar	Sub-Saharan Africa	Rural	Gas	1990	0	0.00042	0.0388558
MWI	Malawi	Sub-Saharan Africa	Rural	Gas	1990	0	4e-05	0.005741
MYS	Malaysia	Eastern Asia and South-eastern Asia	Rural	Gas	1990	0.390807	0.908195	0.998822
MDV	Maldives	Central Asia and Southern Asia	Rural	Gas	1990	0.00099	0.12281	0.601544
MLI	Mali	Sub-Saharan Africa	Rural	Gas	1990	0	0.0061	0.136743
MHL	Marshall Islands	Oceania excluding Australia and New Zealand	Rural	Gas	1990	0	0.00293	0.212176
MRT	Mauritania	Sub-Saharan Africa	Rural	Gas	1990	0.006069	0.063645	0.227215
MEX	Mexico	Latin America & the Caribbean	Rural	Gas	1990	0.0578523	0.28743	0.580261
FSM	Micronesia, Federated States of	Oceania excluding Australia and New Zealand	Rural	Gas	1990	0	0.001785	0.0809282
MNG	Mongolia	Eastern Asia and South-eastern Asia	Rural	Gas	1990	0	0	0.003134
MNE	Montenegro	Northern America and Europe	Rural	Gas	1990	0	0.01	0.293203
MAR	Morocco	Western Asia and Northern Africa	Rural	Gas	1990	0.156612	0.70982	0.983753
MOZ	Mozambique	Sub-Saharan Africa	Rural	Gas	1990	0	0.000415	0.043131
MMR	Myanmar	Eastern Asia and South-eastern Asia	Rural	Gas	1990	0	5e-05	0.0462905
NAM	Namibia	Sub-Saharan Africa	Rural	Gas	1990	1e-05	0.008045	0.0989745
NPL	Nepal	Central Asia and Southern Asia	Rural	Gas	1990	0	9e-05	0.0785208
NIC	Nicaragua	Latin America & the Caribbean	Rural	Gas	1990	0.002219	0.029225	0.112882
NER	Niger	Sub-Saharan Africa	Rural	Gas	1990	0	0.00106	0.0297257
NGA	Nigeria	Sub-Saharan Africa	Rural	Gas	1990	0	0.00357	0.0976043
NIU	Niue	Oceania excluding Australia and New Zealand	Rural	Gas	1990	0	0.04477	0.590879
PAK	Pakistan	Central Asia and Southern Asia	Rural	Gas	1990	0.00021	0.022335	0.190525
PNG	Papua New Guinea	Oceania excluding Australia and New Zealand	Rural	Gas	1990	0	0.00642	0.105913
PRY	Paraguay	Latin America & the Caribbean	Rural	Gas	1990	0.0238245	0.096355	0.220818
PER	Peru	Latin America & the Caribbean	Rural	Gas	1990	0.0002695	0.020185	0.185437
PHL	Philippines	Eastern Asia and South-eastern Asia	Rural	Gas	1990	0.0123687	0.058635	0.157108
MDA	Moldova, Republic of	Northern America and Europe	Rural	Gas	1990	0.00133825	0.065615	0.46245
RUS	Russian Federation	Northern America and Europe	Rural	Gas	1990	0.102392	0.666095	0.994022
RWA	Rwanda	Sub-Saharan Africa	Rural	Gas	1990	0	2e-05	0.010615
LCA	Saint Lucia	Latin America & the Caribbean	Rural	Gas	1990	0.34565	0.814945	0.994942
VCT	Saint Vincent and the Grenadines	Latin America & the Caribbean	Rural	Gas	1990	0.75726	0.953445	0.99986
WSM	Samoa	Oceania excluding Australia and New Zealand	Rural	Gas	1990	0.00012975	0.02821	0.311042
STP	Sao Tome And Principe	Sub-Saharan Africa	Rural	Gas	1990	0	0.000115	0.06214
SEN	Senegal	Sub-Saharan Africa	Rural	Gas	1990	0.00047975	0.017825	0.0899893
SRB	Serbia	Northern America and Europe	Rural	Gas	1990	0.00034975	0.06758	0.497194
SLE	Sierra Leone	Sub-Saharan Africa	Rural	Gas	1990	0	0	0.121777
SLB	Solomon Islands	Oceania excluding Australia and New Zealand	Rural	Gas	1990	0	0.02689	0.457518
SOM	Somalia	Sub-Saharan Africa	Rural	Gas	1990	0	0	0.0134223
ZAF	South Africa	Sub-Saharan Africa	Rural	Gas	1990	0.00323	0.02193	0.0727732
SSD	South Sudan	Sub-Saharan Africa	Rural	Gas	1990	0	0.003585	0.279357
LKA	Sri Lanka	Central Asia and Southern Asia	Rural	Gas	1990	0.005009	0.131675	0.566937
SDN	Sudan	Western Asia and Northern Africa	Rural	Gas	1990	0.0001	0.052795	0.330791
SUR	Suriname	Latin America & the Caribbean	Rural	Gas	1990	0.0389598	0.50287	0.939745
SWZ	Eswatini	Sub-Saharan Africa	Rural	Gas	1990	0.00084925	0.01973	0.0978625
SYR	Syrian Arab Republic	Western Asia and Northern Africa	Rural	Gas	1990	0.438396	0.93503	0.999621
TJK	Tajikistan	Central Asia and Southern Asia	Rural	Gas	1990	3e-05	0.00709	0.0922463
THA	Thailand	Eastern Asia and South-eastern Asia	Rural	Gas	1990	0.124385	0.266575	0.461694
MKD	North Macedonia	Northern America and Europe	Rural	Gas	1990	0	0.00731	0.290666
TLS	Timor-Leste	Eastern Asia and South-eastern Asia	Rural	Gas	1990	0	0.00029	0.111421
TGO	Togo	Sub-Saharan Africa	Rural	Gas	1990	0	0	0.032773
TON	Tonga	Oceania excluding Australia and New Zealand	Rural	Gas	1990	0.022007	0.368855	0.87741
TUN	Tunisia	Western Asia and Northern Africa	Rural	Gas	1990	0.135567	0.7601	0.987783
TUR	Turkey	Western Asia and Northern Africa	Rural	Gas	1990	0.041449	0.609845	0.980223
TKM	Turkmenistan	Central Asia and Southern Asia	Rural	Gas	1990	0.656995	0.94874	0.99955
TUV	Tuvalu	Oceania excluding Australia and New Zealand	Rural	Gas	1990	0	0.061225	0.989186
UGA	Uganda	Sub-Saharan Africa	Rural	Gas	1990	0	0	0.0035415
UKR	Ukraine	Northern America and Europe	Rural	Gas	1990	0.1981	0.729905	0.976361
TZA	Tanzania, United Republic of	Sub-Saharan Africa	Rural	Gas	1990	0	0	0.00335275
UZB	Uzbekistan	Central Asia and Southern Asia	Rural	Gas	1990	0.10346	0.60111	0.94071
VUT	Vanuatu	Oceania excluding Australia and New Zealand	Rural	Gas	1990	0	0.029405	0.465923
VEN	Venezuela (Bolivarian Republic of)	Latin America & the Caribbean	Rural	Gas	1990	0.0984465	0.633005	0.996691
VNM	Viet Nam	Eastern Asia and South-eastern Asia	Rural	Gas	1990	0	0.00011	0.00309025
YEM	Yemen	Western Asia and Northern Africa	Rural	Gas	1990	0.0188955	0.35711	0.878084
ZMB	Zambia	Sub-Saharan Africa	Rural	Gas	1990	0	1e-05	0.00418025
ZWE	Zimbabwe	Sub-Saharan Africa	Rural	Gas	1990	0	0.002235	0.0822633
AFG	Afghanistan	Central Asia and Southern Asia	Rural	Electricity	1990	0	0	0.00913025
ALB	Albania	Northern America and Europe	Rural	Electricity	1990	0	0.004755	0.173656
DZA	Algeria	Western Asia and Northern Africa	Rural	Electricity	1990	0	0.007455	0.345879
AGO	Angola	Sub-Saharan Africa	Rural	Electricity	1990	0	0.00162	0.110053
ARG	Argentina	Latin America & the Caribbean	Rural	Electricity	1990	0	0.00071	0.0341822
ARM	Armenia	Western Asia and Northern Africa	Rural	Electricity	1990	0.00160975	0.075555	0.446799
AZE	Azerbaijan	Western Asia and Northern Africa	Rural	Electricity	1990	0.0046395	0.072885	0.303062
BGD	Bangladesh	Central Asia and Southern Asia	Rural	Electricity	1990	0	0.0001	0.0269108
BLR	Belarus	Northern America and Europe	Rural	Electricity	1990	0	0.01845	0.41388
BLZ	Belize	Latin America & the Caribbean	Rural	Electricity	1990	0	0.00275	0.0254212
BEN	Benin	Sub-Saharan Africa	Rural	Electricity	1990	0	0	0.00169025
BTN	Bhutan	Central Asia and Southern Asia	Rural	Electricity	1990	0	1e-05	0.006322
BOL	Bolivia (Plurinational State of)	Latin America & the Caribbean	Rural	Electricity	1990	0	0.00013	0.00521
BIH	Bosnia and Herzegovina	Northern America and Europe	Rural	Electricity	1990	0.0078085	0.297605	0.820355
BWA	Botswana	Sub-Saharan Africa	Rural	Electricity	1990	0	0.00104	0.0457328
BRA	Brazil	Latin America & the Caribbean	Rural	Electricity	1990	0	0.00104	0.0234952
BFA	Burkina Faso	Sub-Saharan Africa	Rural	Electricity	1990	0	0	0.0008105
BDI	Burundi	Sub-Saharan Africa	Rural	Electricity	1990	0	8e-05	0.046778
CPV	Cabo Verde	Sub-Saharan Africa	Rural	Electricity	1990	0	0	0.00324225
KHM	Cambodia	Eastern Asia and South-eastern Asia	Rural	Electricity	1990	0	0	0.006842
CMR	Cameroon	Sub-Saharan Africa	Rural	Electricity	1990	0	0	0.0037415
CAF	Central African Republic	Sub-Saharan Africa	Rural	Electricity	1990	0	0	0.0133303
TCD	Chad	Sub-Saharan Africa	Rural	Electricity	1990	0	0	0.0854015
CHN	China	Eastern Asia and South-eastern Asia	Rural	Electricity	1990	0	0.01148	0.153357
COL	Colombia	Latin America & the Caribbean	Rural	Electricity	1990	0.0605875	0.136445	0.238525
COM	Comoros	Sub-Saharan Africa	Rural	Electricity	1990	0	0	5e-05
COG	Congo	Sub-Saharan Africa	Rural	Electricity	1990	0	0.001625	0.0850348
COK	Cook Islands	Oceania excluding Australia and New Zealand	Rural	Electricity	1990	0	0.00294	0.71921
CRI	Costa Rica	Latin America & the Caribbean	Rural	Electricity	1990	0.0812405	0.35317	0.700001
CIV	Côte d'Ivoire	Sub-Saharan Africa	Rural	Electricity	1990	0	0.00081	0.0840628
PRK	Democratic Peoples Republic of Korea	Eastern Asia and South-eastern Asia	Rural	Electricity	1990	0	0.00164	0.1457
COD	Democratic Republic of the Congo	Sub-Saharan Africa	Rural	Electricity	1990	0	0.00592	0.360872
DJI	Djibouti	Sub-Saharan Africa	Rural	Electricity	1990	0	0.000915	0.066505
DMA	Dominica	Latin America & the Caribbean	Rural	Electricity	1990	0	8e-05	0.127411
DOM	Dominican Republic	Latin America & the Caribbean	Rural	Electricity	1990	0	0.00047	0.00683
ECU	Ecuador	Latin America & the Caribbean	Rural	Electricity	1990	0	0.004605	0.076133
EGY	Egypt	Western Asia and Northern Africa	Rural	Electricity	1990	0	0.00356	0.0700388
SLV	El Salvador	Latin America & the Caribbean	Rural	Electricity	1990	0	0.00547	0.212817
GNQ	Equatorial Guinea	Sub-Saharan Africa	Rural	Electricity	1990	0	0.003365	0.262672
ERI	Eritrea	Sub-Saharan Africa	Rural	Electricity	1990	0	0	9e-05
ETH	Ethiopia	Sub-Saharan Africa	Rural	Electricity	1990	0	0.00042	0.0751553
FJI	Fiji	Oceania excluding Australia and New Zealand	Rural	Electricity	1990	0	0.00999	0.110717
GAB	Gabon	Sub-Saharan Africa	Rural	Electricity	1990	0	0	0.00046
GMB	Gambia	Sub-Saharan Africa	Rural	Electricity	1990	0	7e-05	0.014273
GEO	Georgia	Western Asia and Northern Africa	Rural	Electricity	1990	0	0.02464	0.380099
GHA	Ghana	Sub-Saharan Africa	Rural	Electricity	1990	0	0.00148	0.012893
GRD	Grenada	Latin America & the Caribbean	Rural	Electricity	1990	0	0.00148	0.127811
GTM	Guatemala	Latin America & the Caribbean	Rural	Electricity	1990	0	0.00436	0.165969
GIN	Guinea	Sub-Saharan Africa	Rural	Electricity	1990	0	2e-05	0.006141
GNB	Guinea-Bissau	Sub-Saharan Africa	Rural	Electricity	1990	0	7e-05	0.0261742
GUY	Guyana	Latin America & the Caribbean	Rural	Electricity	1990	0	0.00153	0.0369457
HTI	Haiti	Latin America & the Caribbean	Rural	Electricity	1990	0	0	0.00234025
HND	Honduras	Latin America & the Caribbean	Rural	Electricity	1990	0	0.00676	0.113519
IND	India	Central Asia and Southern Asia	Rural	Electricity	1990	0	0.000475	0.00504025
IDN	Indonesia	Eastern Asia and South-eastern Asia	Rural	Electricity	1990	4e-05	0.00341	0.0184202
IRN	Iran (Islamic Republic of)	Central Asia and Southern Asia	Rural	Electricity	1990	0	0.001665	0.185911
IRQ	Iraq	Western Asia and Northern Africa	Rural	Electricity	1990	0	0.000745	0.0600048
JAM	Jamaica	Latin America & the Caribbean	Rural	Electricity	1990	0	0.00314	0.0651682
JOR	Jordan	Western Asia and Northern Africa	Rural	Electricity	1990	0	0.00027	0.0405657
KAZ	Kazakhstan	Central Asia and Southern Asia	Rural	Electricity	1990	1e-05	0.01608	0.165187
KEN	Kenya	Sub-Saharan Africa	Rural	Electricity	1990	0	0.00322	0.028703
KIR	Kiribati	Oceania excluding Australia and New Zealand	Rural	Electricity	1990	0	2e-05	0.0278078
KGZ	Kyrgyzstan	Central Asia and Southern Asia	Rural	Electricity	1990	0.00105	0.071925	0.511512
LAO	Lao People's Democratic Republic	Eastern Asia and South-eastern Asia	Rural	Electricity	1990	0	0	0.013982
LSO	Lesotho	Sub-Saharan Africa	Rural	Electricity	1990	0	0.00017	0.0378623
LBR	Liberia	Sub-Saharan Africa	Rural	Electricity	1990	0	0	0.0379222
MDG	Madagascar	Sub-Saharan Africa	Rural	Electricity	1990	0	2e-05	0.0244077
MWI	Malawi	Sub-Saharan Africa	Rural	Electricity	1990	0	0.00153	0.0309255
MYS	Malaysia	Eastern Asia and South-eastern Asia	Rural	Electricity	1990	0	0.001175	0.185258
MDV	Maldives	Central Asia and Southern Asia	Rural	Electricity	1990	0	4e-05	0.0142042
MLI	Mali	Sub-Saharan Africa	Rural	Electricity	1990	0	0	0.016852
MHL	Marshall Islands	Oceania excluding Australia and New Zealand	Rural	Electricity	1990	0	0.00453	0.276543
MRT	Mauritania	Sub-Saharan Africa	Rural	Electricity	1990	0	0.00334	0.0591215
MEX	Mexico	Latin America & the Caribbean	Rural	Electricity	1990	0	0.001385	0.0170115
FSM	Micronesia, Federated States of	Oceania excluding Australia and New Zealand	Rural	Electricity	1990	0	0.194575	0.684823
MNG	Mongolia	Eastern Asia and South-eastern Asia	Rural	Electricity	1990	0	0.013755	0.190451
MNE	Montenegro	Northern America and Europe	Rural	Electricity	1990	0.0240455	0.423655	0.93552
MAR	Morocco	Western Asia and Northern Africa	Rural	Electricity	1990	0	0.00013	0.05809
MOZ	Mozambique	Sub-Saharan Africa	Rural	Electricity	1990	0	0.003625	0.128136
MMR	Myanmar	Eastern Asia and South-eastern Asia	Rural	Electricity	1990	0	0.00494	0.310502
NAM	Namibia	Sub-Saharan Africa	Rural	Electricity	1990	5e-05	0.021705	0.146312
NPL	Nepal	Central Asia and Southern Asia	Rural	Electricity	1990	0	0	0.082822
NIC	Nicaragua	Latin America & the Caribbean	Rural	Electricity	1990	0	0.00059	0.0141102
NER	Niger	Sub-Saharan Africa	Rural	Electricity	1990	0	2e-05	0.00686075
NGA	Nigeria	Sub-Saharan Africa	Rural	Electricity	1990	0	0.001085	0.0553657
NIU	Niue	Oceania excluding Australia and New Zealand	Rural	Electricity	1990	0.0253072	0.4131	0.928211
PAK	Pakistan	Central Asia and Southern Asia	Rural	Electricity	1990	0	2e-05	0.00244025
PNG	Papua New Guinea	Oceania excluding Australia and New Zealand	Rural	Electricity	1990	0	0.004865	0.100507
PRY	Paraguay	Latin America & the Caribbean	Rural	Electricity	1990	0	1e-05	0.002231
PER	Peru	Latin America & the Caribbean	Rural	Electricity	1990	0	0.00017	0.0081115
PHL	Philippines	Eastern Asia and South-eastern Asia	Rural	Electricity	1990	0.00098975	0.0113	0.044414
MDA	Moldova, Republic of	Northern America and Europe	Rural	Electricity	1990	1e-05	0.01287	0.191438
RUS	Russian Federation	Northern America and Europe	Rural	Electricity	1990	0.0030065	0.31029	0.881266
RWA	Rwanda	Sub-Saharan Africa	Rural	Electricity	1990	0	0.00085	0.0215527
LCA	Saint Lucia	Latin America & the Caribbean	Rural	Electricity	1990	0	0.004975	0.0858113
VCT	Saint Vincent and the Grenadines	Latin America & the Caribbean	Rural	Electricity	1990	0	0.00072	0.0867997
WSM	Samoa	Oceania excluding Australia and New Zealand	Rural	Electricity	1990	1e-05	0.02904	0.410366
STP	Sao Tome And Principe	Sub-Saharan Africa	Rural	Electricity	1990	0	0	0.00902025
SEN	Senegal	Sub-Saharan Africa	Rural	Electricity	1990	0	2e-05	0.0042115
SRB	Serbia	Northern America and Europe	Rural	Electricity	1990	0.00527175	0.21166	0.765321
SLE	Sierra Leone	Sub-Saharan Africa	Rural	Electricity	1990	0	4e-05	0.175256
SLB	Solomon Islands	Oceania excluding Australia and New Zealand	Rural	Electricity	1990	0	4e-05	0.0486705
SOM	Somalia	Sub-Saharan Africa	Rural	Electricity	1990	0	0	0.0065635
ZAF	South Africa	Sub-Saharan Africa	Rural	Electricity	1990	0.0547275	0.170095	0.342293
SSD	South Sudan	Sub-Saharan Africa	Rural	Electricity	1990	0	0	0.0023415
LKA	Sri Lanka	Central Asia and Southern Asia	Rural	Electricity	1990	0	0.00712	0.213194
SDN	Sudan	Western Asia and Northern Africa	Rural	Electricity	1990	0	1e-05	0.00430225
SUR	Suriname	Latin America & the Caribbean	Rural	Electricity	1990	0	0.00361	0.185406
SWZ	Eswatini	Sub-Saharan Africa	Rural	Electricity	1990	0.001	0.025565	0.125891
SYR	Syrian Arab Republic	Western Asia and Northern Africa	Rural	Electricity	1990	0	0.008335	0.373868
TJK	Tajikistan	Central Asia and Southern Asia	Rural	Electricity	1990	0.00077975	0.0482	0.261573
THA	Thailand	Eastern Asia and South-eastern Asia	Rural	Electricity	1990	0.00548975	0.034235	0.0900525
MKD	North Macedonia	Northern America and Europe	Rural	Electricity	1990	0.0234785	0.416035	0.909613
TLS	Timor-Leste	Eastern Asia and South-eastern Asia	Rural	Electricity	1990	0	8e-05	0.0515125
TGO	Togo	Sub-Saharan Africa	Rural	Electricity	1990	0	0	0.00555025
TON	Tonga	Oceania excluding Australia and New Zealand	Rural	Electricity	1990	0	0.027455	0.42467
TUN	Tunisia	Western Asia and Northern Africa	Rural	Electricity	1990	0	0.00422	0.203468
TUR	Turkey	Western Asia and Northern Africa	Rural	Electricity	1990	0	0.09487	0.779509
TKM	Turkmenistan	Central Asia and Southern Asia	Rural	Electricity	1990	0	0.005825	0.133384
TUV	Tuvalu	Oceania excluding Australia and New Zealand	Rural	Electricity	1990	0	0.00063	0.313868
UGA	Uganda	Sub-Saharan Africa	Rural	Electricity	1990	0	0.00029	0.0212803
UKR	Ukraine	Northern America and Europe	Rural	Electricity	1990	1e-05	0.043285	0.428086
TZA	Tanzania, United Republic of	Sub-Saharan Africa	Rural	Electricity	1990	0	4e-05	0.0168202
UZB	Uzbekistan	Central Asia and Southern Asia	Rural	Electricity	1990	0	0.02085	0.335264
VUT	Vanuatu	Oceania excluding Australia and New Zealand	Rural	Electricity	1990	0	0.00607	0.241227
VEN	Venezuela (Bolivarian Republic of)	Latin America & the Caribbean	Rural	Electricity	1990	0	0.012365	0.769856
VNM	Viet Nam	Eastern Asia and South-eastern Asia	Rural	Electricity	1990	0	0.000665	0.013182
YEM	Yemen	Western Asia and Northern Africa	Rural	Electricity	1990	0	0.003795	0.197791
ZMB	Zambia	Sub-Saharan Africa	Rural	Electricity	1990	0	0.00173	0.0341757
ZWE	Zimbabwe	Sub-Saharan Africa	Rural	Electricity	1990	0.0021495	0.06362	0.339106
AFG	Afghanistan	Central Asia and Southern Asia	Rural	Biomass	1990	0.472846	0.955555	0.99983
ALB	Albania	Northern America and Europe	Rural	Biomass	1990	0.269504	0.901575	0.999571
DZA	Algeria	Western Asia and Northern Africa	Rural	Biomass	1990	0	0.02673	0.525205
AGO	Angola	Sub-Saharan Africa	Rural	Biomass	1990	0.042272	0.47494	0.920442
ARG	Argentina	Latin America & the Caribbean	Rural	Biomass	1990	0.170741	0.484	0.749901
ARM	Armenia	Western Asia and Northern Africa	Rural	Biomass	1990	0.284151	0.80529	0.985759
AZE	Azerbaijan	Western Asia and Northern Africa	Rural	Biomass	1990	0.534443	0.86217	0.984556
BGD	Bangladesh	Central Asia and Southern Asia	Rural	Biomass	1990	0.772873	0.97523	0.99995
BLR	Belarus	Northern America and Europe	Rural	Biomass	1990	7.975e-05	0.18045	0.859284
BLZ	Belize	Latin America & the Caribbean	Rural	Biomass	1990	0.361448	0.551465	0.715792
BEN	Benin	Sub-Saharan Africa	Rural	Biomass	1990	0.871911	0.982685	0.99998
BTN	Bhutan	Central Asia and Southern Asia	Rural	Biomass	1990	0.719788	0.97143	0.99999
BOL	Bolivia (Plurinational State of)	Latin America & the Caribbean	Rural	Biomass	1990	0.746322	0.87173	0.949792
BIH	Bosnia and Herzegovina	Northern America and Europe	Rural	Biomass	1990	0.0863335	0.614275	0.975141
BWA	Botswana	Sub-Saharan Africa	Rural	Biomass	1990	0.508038	0.86553	0.992634
BRA	Brazil	Latin America & the Caribbean	Rural	Biomass	1990	0.398718	0.63677	0.82476
BFA	Burkina Faso	Sub-Saharan Africa	Rural	Biomass	1990	0.872115	0.960775	0.995481
BDI	Burundi	Sub-Saharan Africa	Rural	Biomass	1990	0.651376	0.968965	0.99997
CPV	Cabo Verde	Sub-Saharan Africa	Rural	Biomass	1990	0.191215	0.59868	0.910097
KHM	Cambodia	Eastern Asia and South-eastern Asia	Rural	Biomass	1990	0.835638	0.956705	0.995852
CMR	Cameroon	Sub-Saharan Africa	Rural	Biomass	1990	0.584484	0.93287	0.999361
CAF	Central African Republic	Sub-Saharan Africa	Rural	Biomass	1990	0.500316	0.971355	1
TCD	Chad	Sub-Saharan Africa	Rural	Biomass	1990	0.140696	0.70695	0.988081
CHN	China	Eastern Asia and South-eastern Asia	Rural	Biomass	1990	0.0347527	0.27927	0.690353
COL	Colombia	Latin America & the Caribbean	Rural	Biomass	1990	0.454404	0.64674	0.814198
COM	Comoros	Sub-Saharan Africa	Rural	Biomass	1990	0.702221	0.963005	0.99988
COG	Congo	Sub-Saharan Africa	Rural	Biomass	1990	0.207927	0.821685	0.993421
COK	Cook Islands	Oceania excluding Australia and New Zealand	Rural	Biomass	1990	0	0.4386	0.99999
CRI	Costa Rica	Latin America & the Caribbean	Rural	Biomass	1990	0.0307788	0.21267	0.615776
CIV	Côte d'Ivoire	Sub-Saharan Africa	Rural	Biomass	1990	0.134303	0.707375	0.981941
PRK	Democratic Peoples Republic of Korea	Eastern Asia and South-eastern Asia	Rural	Biomass	1990	0.123213	0.821165	0.998181
COD	Democratic Republic of the Congo	Sub-Saharan Africa	Rural	Biomass	1990	0.115935	0.78104	0.99634
DJI	Djibouti	Sub-Saharan Africa	Rural	Biomass	1990	0.0734453	0.333485	0.717467
DMA	Dominica	Latin America & the Caribbean	Rural	Biomass	1990	0	0.420085	0.980962
DOM	Dominican Republic	Latin America & the Caribbean	Rural	Biomass	1990	0.359906	0.55253	0.733777
ECU	Ecuador	Latin America & the Caribbean	Rural	Biomass	1990	0.005344	0.49807	0.830997
EGY	Egypt	Western Asia and Northern Africa	Rural	Biomass	1990	1e-05	0.030885	0.28957
SLV	El Salvador	Latin America & the Caribbean	Rural	Biomass	1990	0.318838	0.806285	0.991412
GNQ	Equatorial Guinea	Sub-Saharan Africa	Rural	Biomass	1990	0.013609	0.5568	0.988831
ERI	Eritrea	Sub-Saharan Africa	Rural	Biomass	1990	0.745784	0.940475	0.99675
ETH	Ethiopia	Sub-Saharan Africa	Rural	Biomass	1990	0.631794	0.92284	0.998211
FJI	Fiji	Oceania excluding Australia and New Zealand	Rural	Biomass	1990	0.310532	0.80349	0.99498
GAB	Gabon	Sub-Saharan Africa	Rural	Biomass	1990	0.443657	0.88486	0.9973
GMB	Gambia	Sub-Saharan Africa	Rural	Biomass	1990	0.83067	0.96025	0.99895
GEO	Georgia	Western Asia and Northern Africa	Rural	Biomass	1990	0.39228	0.898045	0.999031
GHA	Ghana	Sub-Saharan Africa	Rural	Biomass	1990	0.797454	0.89871	0.966371
GRD	Grenada	Latin America & the Caribbean	Rural	Biomass	1990	0.00013	0.076395	0.545324
GTM	Guatemala	Latin America & the Caribbean	Rural	Biomass	1990	0.3047	0.71873	0.959057
GIN	Guinea	Sub-Saharan Africa	Rural	Biomass	1990	0.802863	0.9556	0.99812
GNB	Guinea-Bissau	Sub-Saharan Africa	Rural	Biomass	1990	0.796329	0.97938	0.99998
GUY	Guyana	Latin America & the Caribbean	Rural	Biomass	1990	0.00889525	0.13022	0.480135
HTI	Haiti	Latin America & the Caribbean	Rural	Biomass	1990	0.343738	0.76232	0.963212
HND	Honduras	Latin America & the Caribbean	Rural	Biomass	1990	0.408028	0.90457	0.99969
IND	India	Central Asia and Southern Asia	Rural	Biomass	1990	0.870471	0.93587	0.97574
IDN	Indonesia	Eastern Asia and South-eastern Asia	Rural	Biomass	1990	0.741151	0.87228	0.952093
IRN	Iran (Islamic Republic of)	Central Asia and Southern Asia	Rural	Biomass	1990	0	0.00012	0.286432
IRQ	Iraq	Western Asia and Northern Africa	Rural	Biomass	1990	0.00810725	0.330155	0.921389
JAM	Jamaica	Latin America & the Caribbean	Rural	Biomass	1990	0.369084	0.764935	0.97216
JOR	Jordan	Western Asia and Northern Africa	Rural	Biomass	1990	0	0.00088	0.107418
KAZ	Kazakhstan	Central Asia and Southern Asia	Rural	Biomass	1990	4e-05	0.02185	0.245818
KEN	Kenya	Sub-Saharan Africa	Rural	Biomass	1990	0.866856	0.964875	0.99729
KIR	Kiribati	Oceania excluding Australia and New Zealand	Rural	Biomass	1990	0.255875	0.954825	1
KGZ	Kyrgyzstan	Central Asia and Southern Asia	Rural	Biomass	1990	5e-05	0.053805	0.597335
LAO	Lao People's Democratic Republic	Eastern Asia and South-eastern Asia	Rural	Biomass	1990	0.913974	0.985385	0.99985
LSO	Lesotho	Sub-Saharan Africa	Rural	Biomass	1990	0.314528	0.620515	0.880838
LBR	Liberia	Sub-Saharan Africa	Rural	Biomass	1990	0.25992	0.87584	0.99888
MDG	Madagascar	Sub-Saharan Africa	Rural	Biomass	1990	0.725929	0.95686	0.99931
MWI	Malawi	Sub-Saharan Africa	Rural	Biomass	1990	0.935241	0.989805	0.99984
MYS	Malaysia	Eastern Asia and South-eastern Asia	Rural	Biomass	1990	0	0.03077	0.464
MDV	Maldives	Central Asia and Southern Asia	Rural	Biomass	1990	0.304185	0.821855	0.990062
MLI	Mali	Sub-Saharan Africa	Rural	Biomass	1990	0.756023	0.9651	0.99987
MHL	Marshall Islands	Oceania excluding Australia and New Zealand	Rural	Biomass	1990	0.170516	0.89223	0.99992
MRT	Mauritania	Sub-Saharan Africa	Rural	Biomass	1990	0.480046	0.75455	0.91845
MEX	Mexico	Latin America & the Caribbean	Rural	Biomass	1990	0.401293	0.691895	0.933851
FSM	Micronesia, Federated States of	Oceania excluding Australia and New Zealand	Rural	Biomass	1990	0.00026925	0.13188	0.504192
MNG	Mongolia	Eastern Asia and South-eastern Asia	Rural	Biomass	1990	0.595606	0.92165	0.99755
MNE	Montenegro	Northern America and Europe	Rural	Biomass	1990	0.0116048	0.3583	0.896781
MAR	Morocco	Western Asia and Northern Africa	Rural	Biomass	1990	0.00580725	0.24288	0.813447
MOZ	Mozambique	Sub-Saharan Africa	Rural	Biomass	1990	0.835421	0.988865	0.99999
MMR	Myanmar	Eastern Asia and South-eastern Asia	Rural	Biomass	1990	0.288374	0.85794	0.995141
NAM	Namibia	Sub-Saharan Africa	Rural	Biomass	1990	0.775835	0.954125	0.99891
NPL	Nepal	Central Asia and Southern Asia	Rural	Biomass	1990	0.641162	0.823145	0.958166
NIC	Nicaragua	Latin America & the Caribbean	Rural	Biomass	1990	0.825594	0.942785	0.992053
NER	Niger	Sub-Saharan Africa	Rural	Biomass	1990	0.867406	0.98086	0.99996
NGA	Nigeria	Sub-Saharan Africa	Rural	Biomass	1990	0.453887	0.90948	0.99509
NIU	Niue	Oceania excluding Australia and New Zealand	Rural	Biomass	1990	0	5e-05	0.027209
PAK	Pakistan	Central Asia and Southern Asia	Rural	Biomass	1990	0.675827	0.934195	0.997702
PNG	Papua New Guinea	Oceania excluding Australia and New Zealand	Rural	Biomass	1990	0.595563	0.923885	0.99991
PRY	Paraguay	Latin America & the Caribbean	Rural	Biomass	1990	0.748201	0.87399	0.955218
PER	Peru	Latin America & the Caribbean	Rural	Biomass	1990	0.488584	0.871735	0.989702
PHL	Philippines	Eastern Asia and South-eastern Asia	Rural	Biomass	1990	0.633568	0.826665	0.943824
MDA	Moldova, Republic of	Northern America and Europe	Rural	Biomass	1990	0.336409	0.88282	0.994491
RUS	Russian Federation	Northern America and Europe	Rural	Biomass	1990	0	0	0.121677
RWA	Rwanda	Sub-Saharan Africa	Rural	Biomass	1990	0.933527	0.986895	0.99966
LCA	Saint Lucia	Latin America & the Caribbean	Rural	Biomass	1990	0	0.07677	0.271911
VCT	Saint Vincent and the Grenadines	Latin America & the Caribbean	Rural	Biomass	1990	0	0.00523	0.125282
WSM	Samoa	Oceania excluding Australia and New Zealand	Rural	Biomass	1990	0.136434	0.63789	0.962752
STP	Sao Tome And Principe	Sub-Saharan Africa	Rural	Biomass	1990	0.126589	0.815645	0.997631
SEN	Senegal	Sub-Saharan Africa	Rural	Biomass	1990	0.805363	0.966665	0.99848
SRB	Serbia	Northern America and Europe	Rural	Biomass	1990	0.066588	0.558835	0.95429
SLE	Sierra Leone	Sub-Saharan Africa	Rural	Biomass	1990	0.23986	0.854225	0.997831
SLB	Solomon Islands	Oceania excluding Australia and New Zealand	Rural	Biomass	1990	0.393048	0.95236	0.99994
SOM	Somalia	Sub-Saharan Africa	Rural	Biomass	1990	0.234339	0.80825	0.995961
ZAF	South Africa	Sub-Saharan Africa	Rural	Biomass	1990	0.268539	0.51188	0.758974
SSD	South Sudan	Sub-Saharan Africa	Rural	Biomass	1990	0.345417	0.936585	0.99991
LKA	Sri Lanka	Central Asia and Southern Asia	Rural	Biomass	1990	0.205181	0.757635	0.984244
SDN	Sudan	Western Asia and Northern Africa	Rural	Biomass	1990	0.655852	0.941195	0.99958
SUR	Suriname	Latin America & the Caribbean	Rural	Biomass	1990	0.0209408	0.395525	0.931516
SWZ	Eswatini	Sub-Saharan Africa	Rural	Biomass	1990	0.711169	0.91463	0.990292
SYR	Syrian Arab Republic	Western Asia and Northern Africa	Rural	Biomass	1990	0	0.004565	0.255903
TJK	Tajikistan	Central Asia and Southern Asia	Rural	Biomass	1990	0.639362	0.91407	0.994501
THA	Thailand	Eastern Asia and South-eastern Asia	Rural	Biomass	1990	0.152945	0.304375	0.483532
MKD	North Macedonia	Northern America and Europe	Rural	Biomass	1990	0.0414475	0.5002	0.958708
TLS	Timor-Leste	Eastern Asia and South-eastern Asia	Rural	Biomass	1990	0.415651	0.96331	1
TGO	Togo	Sub-Saharan Africa	Rural	Biomass	1990	0.215834	0.79286	0.986742
TON	Tonga	Oceania excluding Australia and New Zealand	Rural	Biomass	1990	0.0229533	0.42196	0.949962
TUN	Tunisia	Western Asia and Northern Africa	Rural	Biomass	1990	0	0.06341	0.638165
TUR	Turkey	Western Asia and Northern Africa	Rural	Biomass	1990	0	0.07086	0.745134
TKM	Turkmenistan	Central Asia and Southern Asia	Rural	Biomass	1990	0	0.024	0.284133
TUV	Tuvalu	Oceania excluding Australia and New Zealand	Rural	Biomass	1990	0	0.04437	0.998882
UGA	Uganda	Sub-Saharan Africa	Rural	Biomass	1990	0.895897	0.968475	0.9968
UKR	Ukraine	Northern America and Europe	Rural	Biomass	1990	0.00034975	0.09484	0.572936
TZA	Tanzania, United Republic of	Sub-Saharan Africa	Rural	Biomass	1990	0.86604	0.994435	1
UZB	Uzbekistan	Central Asia and Southern Asia	Rural	Biomass	1990	0.0173175	0.31066	0.85329
VUT	Vanuatu	Oceania excluding Australia and New Zealand	Rural	Biomass	1990	0.190797	0.860675	0.99828
VEN	Venezuela (Bolivarian Republic of)	Latin America & the Caribbean	Rural	Biomass	1990	0	0.076255	0.806302
VNM	Viet Nam	Eastern Asia and South-eastern Asia	Rural	Biomass	1990	0.853436	0.95527	0.994301
YEM	Yemen	Western Asia and Northern Africa	Rural	Biomass	1990	0.034788	0.515475	0.96166
ZMB	Zambia	Sub-Saharan Africa	Rural	Biomass	1990	0.850159	0.931	0.979255
ZWE	Zimbabwe	Sub-Saharan Africa	Rural	Biomass	1990	0.613731	0.910445	0.993972
AFG	Afghanistan	Central Asia and Southern Asia	Rural	Charcoal	1990	0	0.0114	0.38492
ALB	Albania	Northern America and Europe	Rural	Charcoal	1990	0	0.001365	0.104865
DZA	Algeria	Western Asia and Northern Africa	Rural	Charcoal	1990	0	0.002905	0.201868
AGO	Angola	Sub-Saharan Africa	Rural	Charcoal	1990	0.0157315	0.30898	0.862164
ARG	Argentina	Latin America & the Caribbean	Rural	Charcoal	1990	0	0	0.0057605
ARM	Armenia	Western Asia and Northern Africa	Rural	Charcoal	1990	0	0.02031	0.346724
AZE	Azerbaijan	Western Asia and Northern Africa	Rural	Charcoal	1990	0	0.00585	0.190589
BGD	Bangladesh	Central Asia and Southern Asia	Rural	Charcoal	1990	0	0.00049	0.0771005
BLR	Belarus	Northern America and Europe	Rural	Charcoal	1990	0	0	0.00973175
BLZ	Belize	Latin America & the Caribbean	Rural	Charcoal	1990	0	0	0.0034275
BEN	Benin	Sub-Saharan Africa	Rural	Charcoal	1990	0	1e-05	0.0518038
BTN	Bhutan	Central Asia and Southern Asia	Rural	Charcoal	1990	0	0	0.0005005
BOL	Bolivia (Plurinational State of)	Latin America & the Caribbean	Rural	Charcoal	1990	0	0	0.00017
BIH	Bosnia and Herzegovina	Northern America and Europe	Rural	Charcoal	1990	0	0.002265	0.095501
BWA	Botswana	Sub-Saharan Africa	Rural	Charcoal	1990	0	0	0.00704
BRA	Brazil	Latin America & the Caribbean	Rural	Charcoal	1990	0	0.00094	0.0966618
BFA	Burkina Faso	Sub-Saharan Africa	Rural	Charcoal	1990	0.00038	0.02007	0.0850623
BDI	Burundi	Sub-Saharan Africa	Rural	Charcoal	1990	0	0.01757	0.319053
CPV	Cabo Verde	Sub-Saharan Africa	Rural	Charcoal	1990	0	4e-05	0.0124402
KHM	Cambodia	Eastern Asia and South-eastern Asia	Rural	Charcoal	1990	0.00034975	0.021235	0.110213
CMR	Cameroon	Sub-Saharan Africa	Rural	Charcoal	1990	0	0	0.0378303
CAF	Central African Republic	Sub-Saharan Africa	Rural	Charcoal	1990	0	0.01472	0.439911
TCD	Chad	Sub-Saharan Africa	Rural	Charcoal	1990	8e-05	0.132055	0.717347
CHN	China	Eastern Asia and South-eastern Asia	Rural	Charcoal	1990	0	0	0.012336
COL	Colombia	Latin America & the Caribbean	Rural	Charcoal	1990	0	0	0.057902
COM	Comoros	Sub-Saharan Africa	Rural	Charcoal	1990	0	0.001265	0.0681293
COG	Congo	Sub-Saharan Africa	Rural	Charcoal	1990	5e-05	0.092285	0.677862
COK	Cook Islands	Oceania excluding Australia and New Zealand	Rural	Charcoal	1990	0	0	0.0163425
CRI	Costa Rica	Latin America & the Caribbean	Rural	Charcoal	1990	0	0	0.00421075
CIV	Côte d'Ivoire	Sub-Saharan Africa	Rural	Charcoal	1990	0.00252975	0.20117	0.794207
PRK	Democratic Peoples Republic of Korea	Eastern Asia and South-eastern Asia	Rural	Charcoal	1990	0	1e-05	0.027379
COD	Democratic Republic of the Congo	Sub-Saharan Africa	Rural	Charcoal	1990	0.0001995	0.13	0.819342
DJI	Djibouti	Sub-Saharan Africa	Rural	Charcoal	1990	0.00013975	0.01338	0.0897412
DMA	Dominica	Latin America & the Caribbean	Rural	Charcoal	1990	0	0.049975	0.666498
DOM	Dominican Republic	Latin America & the Caribbean	Rural	Charcoal	1990	0	0	0.290129
ECU	Ecuador	Latin America & the Caribbean	Rural	Charcoal	1990	0	0	0.416516
EGY	Egypt	Western Asia and Northern Africa	Rural	Charcoal	1990	0	0.00287	0.0904878
SLV	El Salvador	Latin America & the Caribbean	Rural	Charcoal	1990	0	0.00387	0.0917618
GNQ	Equatorial Guinea	Sub-Saharan Africa	Rural	Charcoal	1990	0	0.016115	0.521505
ERI	Eritrea	Sub-Saharan Africa	Rural	Charcoal	1990	0	0.01142	0.113542
ETH	Ethiopia	Sub-Saharan Africa	Rural	Charcoal	1990	0	0.00117	0.0435225
FJI	Fiji	Oceania excluding Australia and New Zealand	Rural	Charcoal	1990	0	0	0.0107105
GAB	Gabon	Sub-Saharan Africa	Rural	Charcoal	1990	0	0	0.0325935
GMB	Gambia	Sub-Saharan Africa	Rural	Charcoal	1990	0	0.00053	0.0521648
GEO	Georgia	Western Asia and Northern Africa	Rural	Charcoal	1990	0	0.002235	0.140152
GHA	Ghana	Sub-Saharan Africa	Rural	Charcoal	1990	0.0224388	0.082465	0.17901
GRD	Grenada	Latin America & the Caribbean	Rural	Charcoal	1990	0	0.01957	0.293908
GTM	Guatemala	Latin America & the Caribbean	Rural	Charcoal	1990	0	2e-05	0.0233555
GIN	Guinea	Sub-Saharan Africa	Rural	Charcoal	1990	0	0.01361	0.123923
GNB	Guinea-Bissau	Sub-Saharan Africa	Rural	Charcoal	1990	0	0.01082	0.184999
GUY	Guyana	Latin America & the Caribbean	Rural	Charcoal	1990	0	0	0.0140505
HTI	Haiti	Latin America & the Caribbean	Rural	Charcoal	1990	0.0221175	0.20621	0.631744
HND	Honduras	Latin America & the Caribbean	Rural	Charcoal	1990	0	0	0.0004905
IND	India	Central Asia and Southern Asia	Rural	Charcoal	1990	0	0	0.0185503
IDN	Indonesia	Eastern Asia and South-eastern Asia	Rural	Charcoal	1990	0	0.003875	0.0272853
IRN	Iran (Islamic Republic of)	Central Asia and Southern Asia	Rural	Charcoal	1990	0	0	0.0349505
IRQ	Iraq	Western Asia and Northern Africa	Rural	Charcoal	1990	0	0	0.00218075
JAM	Jamaica	Latin America & the Caribbean	Rural	Charcoal	1990	0	0.00032	0.0605912
JOR	Jordan	Western Asia and Northern Africa	Rural	Charcoal	1990	0	0	0.0307255
KAZ	Kazakhstan	Central Asia and Southern Asia	Rural	Charcoal	1990	0	0.00281	0.186287
KEN	Kenya	Sub-Saharan Africa	Rural	Charcoal	1990	9e-05	0.014745	0.0956743
KIR	Kiribati	Oceania excluding Australia and New Zealand	Rural	Charcoal	1990	0	0	0.055286
KGZ	Kyrgyzstan	Central Asia and Southern Asia	Rural	Charcoal	1990	0	0.01497	0.370937
LAO	Lao People's Democratic Republic	Eastern Asia and South-eastern Asia	Rural	Charcoal	1990	0	0.005325	0.057079
LSO	Lesotho	Sub-Saharan Africa	Rural	Charcoal	1990	0	4e-05	0.013633
LBR	Liberia	Sub-Saharan Africa	Rural	Charcoal	1990	0	0.07653	0.670704
MDG	Madagascar	Sub-Saharan Africa	Rural	Charcoal	1990	0	0.02689	0.255391
MWI	Malawi	Sub-Saharan Africa	Rural	Charcoal	1990	0	0.00265	0.0422403
MYS	Malaysia	Eastern Asia and South-eastern Asia	Rural	Charcoal	1990	0	0.00066	0.0689445
MDV	Maldives	Central Asia and Southern Asia	Rural	Charcoal	1990	0	0	0.016802
MLI	Mali	Sub-Saharan Africa	Rural	Charcoal	1990	0	4e-05	0.0279965
MHL	Marshall Islands	Oceania excluding Australia and New Zealand	Rural	Charcoal	1990	0	0.00138	0.184504
MRT	Mauritania	Sub-Saharan Africa	Rural	Charcoal	1990	0.0247698	0.15257	0.432174
MEX	Mexico	Latin America & the Caribbean	Rural	Charcoal	1990	0	5.5e-05	0.0147335
FSM	Micronesia, Federated States of	Oceania excluding Australia and New Zealand	Rural	Charcoal	1990	0	0	0.00210125
MNG	Mongolia	Eastern Asia and South-eastern Asia	Rural	Charcoal	1990	0	0	0.008472
MNE	Montenegro	Northern America and Europe	Rural	Charcoal	1990	0	0.000825	0.123341
MAR	Morocco	Western Asia and Northern Africa	Rural	Charcoal	1990	0	0.00038	0.0405268
MOZ	Mozambique	Sub-Saharan Africa	Rural	Charcoal	1990	0	0.00017	0.0383205
MMR	Myanmar	Eastern Asia and South-eastern Asia	Rural	Charcoal	1990	0.00044	0.087445	0.595388
NAM	Namibia	Sub-Saharan Africa	Rural	Charcoal	1990	0	0.00023	0.0270318
NPL	Nepal	Central Asia and Southern Asia	Rural	Charcoal	1990	0	1e-05	0.00952325
NIC	Nicaragua	Latin America & the Caribbean	Rural	Charcoal	1990	0	0.00343	0.069133
NER	Niger	Sub-Saharan Africa	Rural	Charcoal	1990	0	0.00016	0.022143
NGA	Nigeria	Sub-Saharan Africa	Rural	Charcoal	1990	0	5e-05	0.0748125
NIU	Niue	Oceania excluding Australia and New Zealand	Rural	Charcoal	1990	0	0.0002	0.0879705
PAK	Pakistan	Central Asia and Southern Asia	Rural	Charcoal	1990	0	7e-05	0.0237023
PNG	Papua New Guinea	Oceania excluding Australia and New Zealand	Rural	Charcoal	1990	0	0.00013	0.038984
PRY	Paraguay	Latin America & the Caribbean	Rural	Charcoal	1990	0.00158	0.023525	0.0776952
PER	Peru	Latin America & the Caribbean	Rural	Charcoal	1990	0	0.00349	0.0630895
PHL	Philippines	Eastern Asia and South-eastern Asia	Rural	Charcoal	1990	0.00127925	0.027485	0.0934853
MDA	Moldova, Republic of	Northern America and Europe	Rural	Charcoal	1990	0	0.00139	0.217877
RUS	Russian Federation	Northern America and Europe	Rural	Charcoal	1990	0	0	8e-05
RWA	Rwanda	Sub-Saharan Africa	Rural	Charcoal	1990	0	0.007005	0.0575905
LCA	Saint Lucia	Latin America & the Caribbean	Rural	Charcoal	1990	0	0.034015	0.456202
VCT	Saint Vincent and the Grenadines	Latin America & the Caribbean	Rural	Charcoal	1990	0	3e-05	0.015401
WSM	Samoa	Oceania excluding Australia and New Zealand	Rural	Charcoal	1990	0	0.011155	0.391941
STP	Sao Tome And Principe	Sub-Saharan Africa	Rural	Charcoal	1990	0	0.04416	0.598738
SEN	Senegal	Sub-Saharan Africa	Rural	Charcoal	1990	0	0.002875	0.162484
SRB	Serbia	Northern America and Europe	Rural	Charcoal	1990	0	9e-05	0.068167
SLE	Sierra Leone	Sub-Saharan Africa	Rural	Charcoal	1990	0	0.01049	0.222404
SLB	Solomon Islands	Oceania excluding Australia and New Zealand	Rural	Charcoal	1990	0	0.00011	0.0494005
SOM	Somalia	Sub-Saharan Africa	Rural	Charcoal	1990	0.00019975	0.136905	0.698445
ZAF	South Africa	Sub-Saharan Africa	Rural	Charcoal	1990	0	0	0.0028405
SSD	South Sudan	Sub-Saharan Africa	Rural	Charcoal	1990	0	0.02589	0.515907
LKA	Sri Lanka	Central Asia and Southern Asia	Rural	Charcoal	1990	0	5e-05	0.0368778
SDN	Sudan	Western Asia and Northern Africa	Rural	Charcoal	1990	0	0	0.0419455
SUR	Suriname	Latin America & the Caribbean	Rural	Charcoal	1990	0	0.00304	0.155352
SWZ	Eswatini	Sub-Saharan Africa	Rural	Charcoal	1990	0	0	0.001531
SYR	Syrian Arab Republic	Western Asia and Northern Africa	Rural	Charcoal	1990	0	0	0.00178
TJK	Tajikistan	Central Asia and Southern Asia	Rural	Charcoal	1990	0	0	0.039861
THA	Thailand	Eastern Asia and South-eastern Asia	Rural	Charcoal	1990	0.201196	0.37666	0.557063
MKD	North Macedonia	Northern America and Europe	Rural	Charcoal	1990	0	0.00103	0.0912005
TLS	Timor-Leste	Eastern Asia and South-eastern Asia	Rural	Charcoal	1990	0	0.00099	0.217287
TGO	Togo	Sub-Saharan Africa	Rural	Charcoal	1990	0.00283825	0.14722	0.733874
TON	Tonga	Oceania excluding Australia and New Zealand	Rural	Charcoal	1990	0	0	0.0119122
TUN	Tunisia	Western Asia and Northern Africa	Rural	Charcoal	1990	0	0.0004	0.236992
TUR	Turkey	Western Asia and Northern Africa	Rural	Charcoal	1990	0	0	0.00198025
TKM	Turkmenistan	Central Asia and Southern Asia	Rural	Charcoal	1990	0	0	0.00106
TUV	Tuvalu	Oceania excluding Australia and New Zealand	Rural	Charcoal	1990	0	0	0.0332628
UGA	Uganda	Sub-Saharan Africa	Rural	Charcoal	1990	0.00131975	0.021175	0.0743515
UKR	Ukraine	Northern America and Europe	Rural	Charcoal	1990	0	0.00238	0.0990858
TZA	Tanzania, United Republic of	Sub-Saharan Africa	Rural	Charcoal	1990	0	0.00078	0.122761
UZB	Uzbekistan	Central Asia and Southern Asia	Rural	Charcoal	1990	0	0.00044	0.0450393
VUT	Vanuatu	Oceania excluding Australia and New Zealand	Rural	Charcoal	1990	0	0.0014	0.181263
VEN	Venezuela (Bolivarian Republic of)	Latin America & the Caribbean	Rural	Charcoal	1990	0	0	0.0061605
VNM	Viet Nam	Eastern Asia and South-eastern Asia	Rural	Charcoal	1990	8e-05	0.02787	0.121564
YEM	Yemen	Western Asia and Northern Africa	Rural	Charcoal	1990	0	0.00083	0.110531
ZMB	Zambia	Sub-Saharan Africa	Rural	Charcoal	1990	0.017549	0.061195	0.139734
ZWE	Zimbabwe	Sub-Saharan Africa	Rural	Charcoal	1990	0	0.00037	0.0323382
AFG	Afghanistan	Central Asia and Southern Asia	Rural	Coal	1990	0	0	0.064531
ALB	Albania	Northern America and Europe	Rural	Coal	1990	0	0	0.00379025
DZA	Algeria	Western Asia and Northern Africa	Rural	Coal	1990	0	0	0.00292025
AGO	Angola	Sub-Saharan Africa	Rural	Coal	1990	0	0.00033	0.0560245
ARG	Argentina	Latin America & the Caribbean	Rural	Coal	1990	0	0	0.0059745
ARM	Armenia	Western Asia and Northern Africa	Rural	Coal	1990	0	0	0.00812875
AZE	Azerbaijan	Western Asia and Northern Africa	Rural	Coal	1990	0	0	0.00384025
BGD	Bangladesh	Central Asia and Southern Asia	Rural	Coal	1990	0	0	0.00157025
BLR	Belarus	Northern America and Europe	Rural	Coal	1990	0	0	0.00904375
BLZ	Belize	Latin America & the Caribbean	Rural	Coal	1990	0	3e-05	0.01224
BEN	Benin	Sub-Saharan Africa	Rural	Coal	1990	0	0	0.00039
BTN	Bhutan	Central Asia and Southern Asia	Rural	Coal	1990	0	0	0.0264227
BOL	Bolivia (Plurinational State of)	Latin America & the Caribbean	Rural	Coal	1990	0	1e-05	0.0203615
BIH	Bosnia and Herzegovina	Northern America and Europe	Rural	Coal	1990	0	0.00077	0.0471005
BWA	Botswana	Sub-Saharan Africa	Rural	Coal	1990	0	0.00129	0.0440342
BRA	Brazil	Latin America & the Caribbean	Rural	Coal	1990	0	0	0.00054025
BFA	Burkina Faso	Sub-Saharan Africa	Rural	Coal	1990	0	4e-05	0.00539
BDI	Burundi	Sub-Saharan Africa	Rural	Coal	1990	0	0	0.00387075
CPV	Cabo Verde	Sub-Saharan Africa	Rural	Coal	1990	0	0	0.00067
KHM	Cambodia	Eastern Asia and South-eastern Asia	Rural	Coal	1990	0	1e-05	0.00165
CMR	Cameroon	Sub-Saharan Africa	Rural	Coal	1990	0	0	0.00041
CAF	Central African Republic	Sub-Saharan Africa	Rural	Coal	1990	0	0	0.0334943
TCD	Chad	Sub-Saharan Africa	Rural	Coal	1990	0	0.01138	0.371254
CHN	China	Eastern Asia and South-eastern Asia	Rural	Coal	1990	0.0615127	0.3434	0.752474
COL	Colombia	Latin America & the Caribbean	Rural	Coal	1990	0	0.03117	0.107517
COM	Comoros	Sub-Saharan Africa	Rural	Coal	1990	0	0	0.00356
COG	Congo	Sub-Saharan Africa	Rural	Coal	1990	0	0.0002	0.0655468
COK	Cook Islands	Oceania excluding Australia and New Zealand	Rural	Coal	1990	0	0	0.0192608
CRI	Costa Rica	Latin America & the Caribbean	Rural	Coal	1990	0	0	0.00394125
CIV	Côte d'Ivoire	Sub-Saharan Africa	Rural	Coal	1990	0	3e-05	0.0909298
PRK	Democratic Peoples Republic of Korea	Eastern Asia and South-eastern Asia	Rural	Coal	1990	0	0.079665	0.76143
COD	Democratic Republic of the Congo	Sub-Saharan Africa	Rural	Coal	1990	0	4e-05	0.0405888
DJI	Djibouti	Sub-Saharan Africa	Rural	Coal	1990	0	0	0.00116
DMA	Dominica	Latin America & the Caribbean	Rural	Coal	1990	0	0.01748	0.529538
DOM	Dominican Republic	Latin America & the Caribbean	Rural	Coal	1990	0	0.203075	0.395012
ECU	Ecuador	Latin America & the Caribbean	Rural	Coal	1990	0	0	0.00091
EGY	Egypt	Western Asia and Northern Africa	Rural	Coal	1990	0	0.00106	0.0437287
SLV	El Salvador	Latin America & the Caribbean	Rural	Coal	1990	0	0	0.0018505
GNQ	Equatorial Guinea	Sub-Saharan Africa	Rural	Coal	1990	0	0.002155	0.253348
ERI	Eritrea	Sub-Saharan Africa	Rural	Coal	1990	0	0	0.0022005
ETH	Ethiopia	Sub-Saharan Africa	Rural	Coal	1990	0	0	0.00077
FJI	Fiji	Oceania excluding Australia and New Zealand	Rural	Coal	1990	0	0	0.0121235
GAB	Gabon	Sub-Saharan Africa	Rural	Coal	1990	0	0	0.0007605
GMB	Gambia	Sub-Saharan Africa	Rural	Coal	1990	0	0	0.00107025
GEO	Georgia	Western Asia and Northern Africa	Rural	Coal	1990	0	0	0.0372603
GHA	Ghana	Sub-Saharan Africa	Rural	Coal	1990	0	1e-05	0.00207
GRD	Grenada	Latin America & the Caribbean	Rural	Coal	1990	0	7e-05	0.0510205
GTM	Guatemala	Latin America & the Caribbean	Rural	Coal	1990	0	0	0.004161
GIN	Guinea	Sub-Saharan Africa	Rural	Coal	1990	0	0	0.0017
GNB	Guinea-Bissau	Sub-Saharan Africa	Rural	Coal	1990	0	0	0.00286
GUY	Guyana	Latin America & the Caribbean	Rural	Coal	1990	0	0.00236	0.0497575
HTI	Haiti	Latin America & the Caribbean	Rural	Coal	1990	0	1e-05	0.008151
HND	Honduras	Latin America & the Caribbean	Rural	Coal	1990	0	7e-05	0.0369903
IND	India	Central Asia and Southern Asia	Rural	Coal	1990	0.00172975	0.020005	0.0565602
IDN	Indonesia	Eastern Asia and South-eastern Asia	Rural	Coal	1990	0	0	0.00121
IRN	Iran (Islamic Republic of)	Central Asia and Southern Asia	Rural	Coal	1990	0	0	0.0157708
IRQ	Iraq	Western Asia and Northern Africa	Rural	Coal	1990	0	1e-05	0.106116
JAM	Jamaica	Latin America & the Caribbean	Rural	Coal	1990	0	0	0.00299025
JOR	Jordan	Western Asia and Northern Africa	Rural	Coal	1990	0	0	0.0002405
KAZ	Kazakhstan	Central Asia and Southern Asia	Rural	Coal	1990	0.0213983	0.35305	0.845951
KEN	Kenya	Sub-Saharan Africa	Rural	Coal	1990	0	0	0.00136025
KIR	Kiribati	Oceania excluding Australia and New Zealand	Rural	Coal	1990	0	0	0.059356
KGZ	Kyrgyzstan	Central Asia and Southern Asia	Rural	Coal	1990	0.0933563	0.604695	0.93715
LAO	Lao People's Democratic Republic	Eastern Asia and South-eastern Asia	Rural	Coal	1990	0	0	0.00095
LSO	Lesotho	Sub-Saharan Africa	Rural	Coal	1990	0	2e-05	0.011891
LBR	Liberia	Sub-Saharan Africa	Rural	Coal	1990	0	3e-05	0.0460705
MDG	Madagascar	Sub-Saharan Africa	Rural	Coal	1990	0	0	0.0015605
MWI	Malawi	Sub-Saharan Africa	Rural	Coal	1990	0	1e-05	0.0015705
MYS	Malaysia	Eastern Asia and South-eastern Asia	Rural	Coal	1990	0	0	0.00103
MDV	Maldives	Central Asia and Southern Asia	Rural	Coal	1990	0	0	0.0176542
MLI	Mali	Sub-Saharan Africa	Rural	Coal	1990	0	0	0.00124
MHL	Marshall Islands	Oceania excluding Australia and New Zealand	Rural	Coal	1990	0	0	0.00477125
MRT	Mauritania	Sub-Saharan Africa	Rural	Coal	1990	0	2e-05	0.00798025
MEX	Mexico	Latin America & the Caribbean	Rural	Coal	1990	0	0	0.00452225
FSM	Micronesia, Federated States of	Oceania excluding Australia and New Zealand	Rural	Coal	1990	0	0	0.00331075
MNG	Mongolia	Eastern Asia and South-eastern Asia	Rural	Coal	1990	1e-05	0.042005	0.335591
MNE	Montenegro	Northern America and Europe	Rural	Coal	1990	0	0.0429	0.499577
MAR	Morocco	Western Asia and Northern Africa	Rural	Coal	1990	0	0.00107	0.063942
MOZ	Mozambique	Sub-Saharan Africa	Rural	Coal	1990	0	0	0.0068105
MMR	Myanmar	Eastern Asia and South-eastern Asia	Rural	Coal	1990	0	5e-05	0.013343
NAM	Namibia	Sub-Saharan Africa	Rural	Coal	1990	0	0	0.014531
NPL	Nepal	Central Asia and Southern Asia	Rural	Coal	1990	0	1e-05	0.0122302
NIC	Nicaragua	Latin America & the Caribbean	Rural	Coal	1990	0	0	0.00029
NER	Niger	Sub-Saharan Africa	Rural	Coal	1990	0	0	0.00058025
NGA	Nigeria	Sub-Saharan Africa	Rural	Coal	1990	0	0.001825	0.100832
NIU	Niue	Oceania excluding Australia and New Zealand	Rural	Coal	1990	0	0	0.0035515
PAK	Pakistan	Central Asia and Southern Asia	Rural	Coal	1990	0	0	0.00018
PNG	Papua New Guinea	Oceania excluding Australia and New Zealand	Rural	Coal	1990	0	0	0.00057
PRY	Paraguay	Latin America & the Caribbean	Rural	Coal	1990	0	0	0.00114025
PER	Peru	Latin America & the Caribbean	Rural	Coal	1990	0	0.00019	0.0283347
PHL	Philippines	Eastern Asia and South-eastern Asia	Rural	Coal	1990	0	1e-05	0.00203025
MDA	Moldova, Republic of	Northern America and Europe	Rural	Coal	1990	0	0	0.00600025
RUS	Russian Federation	Northern America and Europe	Rural	Coal	1990	0	0	0.00763075
RWA	Rwanda	Sub-Saharan Africa	Rural	Coal	1990	0	0	0.001931
LCA	Saint Lucia	Latin America & the Caribbean	Rural	Coal	1990	0	3e-05	0.0146053
VCT	Saint Vincent and the Grenadines	Latin America & the Caribbean	Rural	Coal	1990	0	0.004005	0.108763
WSM	Samoa	Oceania excluding Australia and New Zealand	Rural	Coal	1990	0	0	0.0118505
STP	Sao Tome And Principe	Sub-Saharan Africa	Rural	Coal	1990	0	0	0.0210012
SEN	Senegal	Sub-Saharan Africa	Rural	Coal	1990	0	0	0.00065025
SRB	Serbia	Northern America and Europe	Rural	Coal	1990	0	0.01751	0.35571
SLE	Sierra Leone	Sub-Saharan Africa	Rural	Coal	1990	0	0	0.0106305
SLB	Solomon Islands	Oceania excluding Australia and New Zealand	Rural	Coal	1990	0	1e-05	0.0132095
SOM	Somalia	Sub-Saharan Africa	Rural	Coal	1990	0	0	0.0109935
ZAF	South Africa	Sub-Saharan Africa	Rural	Coal	1990	0.00487775	0.04915	0.145942
SSD	South Sudan	Sub-Saharan Africa	Rural	Coal	1990	0	3e-05	0.0306045
LKA	Sri Lanka	Central Asia and Southern Asia	Rural	Coal	1990	0	0	0.00705025
SDN	Sudan	Western Asia and Northern Africa	Rural	Coal	1990	0	0	0.00083025
SUR	Suriname	Latin America & the Caribbean	Rural	Coal	1990	0	0	0.0037005
SWZ	Eswatini	Sub-Saharan Africa	Rural	Coal	1990	0	0.00795	0.0789408
SYR	Syrian Arab Republic	Western Asia and Northern Africa	Rural	Coal	1990	0	0	0.002071
TJK	Tajikistan	Central Asia and Southern Asia	Rural	Coal	1990	0	0.00413	0.0929507
THA	Thailand	Eastern Asia and South-eastern Asia	Rural	Coal	1990	0	7e-05	0.0109663
MKD	North Macedonia	Northern America and Europe	Rural	Coal	1990	0	0	0.00864925
TLS	Timor-Leste	Eastern Asia and South-eastern Asia	Rural	Coal	1990	0	0	0.00462075
TGO	Togo	Sub-Saharan Africa	Rural	Coal	1990	0	5e-05	0.0236123
TON	Tonga	Oceania excluding Australia and New Zealand	Rural	Coal	1990	0	0	0.011603
TUN	Tunisia	Western Asia and Northern Africa	Rural	Coal	1990	0	0	0.0162282
TUR	Turkey	Western Asia and Northern Africa	Rural	Coal	1990	0	0.00258	0.211181
TKM	Turkmenistan	Central Asia and Southern Asia	Rural	Coal	1990	0	0	0.00103025
TUV	Tuvalu	Oceania excluding Australia and New Zealand	Rural	Coal	1990	0	0	0.032247
UGA	Uganda	Sub-Saharan Africa	Rural	Coal	1990	0	1e-05	0.00098
UKR	Ukraine	Northern America and Europe	Rural	Coal	1990	4e-05	0.02931	0.329645
TZA	Tanzania, United Republic of	Sub-Saharan Africa	Rural	Coal	1990	0	0	0.00027025
UZB	Uzbekistan	Central Asia and Southern Asia	Rural	Coal	1990	0	1e-05	0.00514
VUT	Vanuatu	Oceania excluding Australia and New Zealand	Rural	Coal	1990	0	0	0.0522032
VEN	Venezuela (Bolivarian Republic of)	Latin America & the Caribbean	Rural	Coal	1990	0	0	0.00606075
VNM	Viet Nam	Eastern Asia and South-eastern Asia	Rural	Coal	1990	0	8e-05	0.0574052
YEM	Yemen	Western Asia and Northern Africa	Rural	Coal	1990	0	0	0.004151
ZMB	Zambia	Sub-Saharan Africa	Rural	Coal	1990	0	1e-05	0.0022305
ZWE	Zimbabwe	Sub-Saharan Africa	Rural	Coal	1990	0	0	0.010161
AFG	Afghanistan	Central Asia and Southern Asia	Rural	Total Polluting	1990	0.741525	0.99342	1
ALB	Albania	Northern America and Europe	Rural	Total Polluting	1990	0.283737	0.92174	1
DZA	Algeria	Western Asia and Northern Africa	Rural	Total Polluting	1990	0	0.049865	0.661099
AGO	Angola	Sub-Saharan Africa	Rural	Total Polluting	1990	0.311144	0.91435	0.99996
ARG	Argentina	Latin America & the Caribbean	Rural	Total Polluting	1990	0.187151	0.497205	0.760583
ARM	Armenia	Western Asia and Northern Africa	Rural	Total Polluting	1990	0.39273	0.88421	0.997372
AZE	Azerbaijan	Western Asia and Northern Africa	Rural	Total Polluting	1990	0.671805	0.91988	0.994582
BGD	Bangladesh	Central Asia and Southern Asia	Rural	Total Polluting	1990	0.871479	0.991165	1
BLR	Belarus	Northern America and Europe	Rural	Total Polluting	1990	0.00101925	0.194705	0.867408
BLZ	Belize	Latin America & the Caribbean	Rural	Total Polluting	1990	0.4036	0.583755	0.73963
BEN	Benin	Sub-Saharan Africa	Rural	Total Polluting	1990	0.987969	0.99979	1
BTN	Bhutan	Central Asia and Southern Asia	Rural	Total Polluting	1990	0.878142	0.99372	1
BOL	Bolivia (Plurinational State of)	Latin America & the Caribbean	Rural	Total Polluting	1990	0.768613	0.884325	0.955472
BIH	Bosnia and Herzegovina	Northern America and Europe	Rural	Total Polluting	1990	0.094846	0.638445	0.98875
BWA	Botswana	Sub-Saharan Africa	Rural	Total Polluting	1990	0.649196	0.92217	0.997861
BRA	Brazil	Latin America & the Caribbean	Rural	Total Polluting	1990	0.41638	0.64971	0.836028
BFA	Burkina Faso	Sub-Saharan Africa	Rural	Total Polluting	1990	0.94412	0.99531	1
BDI	Burundi	Sub-Saharan Africa	Rural	Total Polluting	1990	0.892227	0.9988	1
CPV	Cabo Verde	Sub-Saharan Africa	Rural	Total Polluting	1990	0.191232	0.601345	0.915644
KHM	Cambodia	Eastern Asia and South-eastern Asia	Rural	Total Polluting	1990	0.931708	0.99561	1
CMR	Cameroon	Sub-Saharan Africa	Rural	Total Polluting	1990	0.878969	0.99007	0.99998
CAF	Central African Republic	Sub-Saharan Africa	Rural	Total Polluting	1990	0.965765	0.99999	1
TCD	Chad	Sub-Saharan Africa	Rural	Total Polluting	1990	0.564449	0.97759	1
CHN	China	Eastern Asia and South-eastern Asia	Rural	Total Polluting	1990	0.181851	0.701405	0.984829
COL	Colombia	Latin America & the Caribbean	Rural	Total Polluting	1990	0.579549	0.74515	0.879856
COM	Comoros	Sub-Saharan Africa	Rural	Total Polluting	1990	0.985929	0.99983	1
COG	Congo	Sub-Saharan Africa	Rural	Total Polluting	1990	0.783277	0.992015	1
COK	Cook Islands	Oceania excluding Australia and New Zealand	Rural	Total Polluting	1990	9e-05	0.63233	1
CRI	Costa Rica	Latin America & the Caribbean	Rural	Total Polluting	1990	0.0337035	0.216625	0.619529
CIV	Côte d'Ivoire	Sub-Saharan Africa	Rural	Total Polluting	1990	0.641821	0.97534	1
PRK	Democratic Peoples Republic of Korea	Eastern Asia and South-eastern Asia	Rural	Total Polluting	1990	0.606301	0.990685	1
COD	Democratic Republic of the Congo	Sub-Saharan Africa	Rural	Total Polluting	1990	0.513336	0.98921	1
DJI	Djibouti	Sub-Saharan Africa	Rural	Total Polluting	1990	0.885561	0.98827	1
DMA	Dominica	Latin America & the Caribbean	Rural	Total Polluting	1990	0.00314575	0.82739	1
DOM	Dominican Republic	Latin America & the Caribbean	Rural	Total Polluting	1990	0.616836	0.79022	0.906313
ECU	Ecuador	Latin America & the Caribbean	Rural	Total Polluting	1990	0.190782	0.53757	0.849726
EGY	Egypt	Western Asia and Northern Africa	Rural	Total Polluting	1990	0.245956	0.700445	0.946092
SLV	El Salvador	Latin America & the Caribbean	Rural	Total Polluting	1990	0.378374	0.849875	0.99861
GNQ	Equatorial Guinea	Sub-Saharan Africa	Rural	Total Polluting	1990	0.309357	0.95553	1
ERI	Eritrea	Sub-Saharan Africa	Rural	Total Polluting	1990	0.950956	0.99707	1
ETH	Ethiopia	Sub-Saharan Africa	Rural	Total Polluting	1990	0.794133	0.984095	1
FJI	Fiji	Oceania excluding Australia and New Zealand	Rural	Total Polluting	1990	0.539443	0.92089	0.99949
GAB	Gabon	Sub-Saharan Africa	Rural	Total Polluting	1990	0.473289	0.89356	0.998551
GMB	Gambia	Sub-Saharan Africa	Rural	Total Polluting	1990	0.841891	0.96799	0.99978
GEO	Georgia	Western Asia and Northern Africa	Rural	Total Polluting	1990	0.442381	0.928945	1
GHA	Ghana	Sub-Saharan Africa	Rural	Total Polluting	1990	0.96714	0.99464	0.99994
GRD	Grenada	Latin America & the Caribbean	Rural	Total Polluting	1990	0.00268975	0.153725	0.742846
GTM	Guatemala	Latin America & the Caribbean	Rural	Total Polluting	1990	0.309598	0.72433	0.960055
GIN	Guinea	Sub-Saharan Africa	Rural	Total Polluting	1990	0.978815	0.9991	1
GNB	Guinea-Bissau	Sub-Saharan Africa	Rural	Total Polluting	1990	0.936141	0.99893	1
GUY	Guyana	Latin America & the Caribbean	Rural	Total Polluting	1990	0.504395	0.855175	0.981533
HTI	Haiti	Latin America & the Caribbean	Rural	Total Polluting	1990	0.917805	0.996435	1
HND	Honduras	Latin America & the Caribbean	Rural	Total Polluting	1990	0.637125	0.95959	1
IND	India	Central Asia and Southern Asia	Rural	Total Polluting	1990	0.94329	0.978175	0.99505
IDN	Indonesia	Eastern Asia and South-eastern Asia	Rural	Total Polluting	1990	0.968697	0.99369	0.9999
IRN	Iran (Islamic Republic of)	Central Asia and Southern Asia	Rural	Total Polluting	1990	0.00017	0.13663	0.838173
IRQ	Iraq	Western Asia and Northern Africa	Rural	Total Polluting	1990	0.132692	0.715205	0.988055
JAM	Jamaica	Latin America & the Caribbean	Rural	Total Polluting	1990	0.409658	0.78858	0.977208
JOR	Jordan	Western Asia and Northern Africa	Rural	Total Polluting	1990	0	0.01348	0.204514
KAZ	Kazakhstan	Central Asia and Southern Asia	Rural	Total Polluting	1990	0.0371192	0.43766	0.922921
KEN	Kenya	Sub-Saharan Africa	Rural	Total Polluting	1990	0.957874	0.994775	1
KIR	Kiribati	Oceania excluding Australia and New Zealand	Rural	Total Polluting	1990	0.860128	0.99943	1
KGZ	Kyrgyzstan	Central Asia and Southern Asia	Rural	Total Polluting	1990	0.220137	0.807245	0.994817
LAO	Lao People's Democratic Republic	Eastern Asia and South-eastern Asia	Rural	Total Polluting	1990	0.939544	0.996935	1
LSO	Lesotho	Sub-Saharan Africa	Rural	Total Polluting	1990	0.823454	0.95813	0.99628
LBR	Liberia	Sub-Saharan Africa	Rural	Total Polluting	1990	0.897879	0.99998	1
MDG	Madagascar	Sub-Saharan Africa	Rural	Total Polluting	1990	0.927647	0.99537	1
MWI	Malawi	Sub-Saharan Africa	Rural	Total Polluting	1990	0.964618	0.99814	1
MYS	Malaysia	Eastern Asia and South-eastern Asia	Rural	Total Polluting	1990	0.00010975	0.06428	0.555011
MDV	Maldives	Central Asia and Southern Asia	Rural	Total Polluting	1990	0.393417	0.875745	0.998981
MLI	Mali	Sub-Saharan Africa	Rural	Total Polluting	1990	0.809374	0.98546	1
MHL	Marshall Islands	Oceania excluding Australia and New Zealand	Rural	Total Polluting	1990	0.530124	0.985225	1
MRT	Mauritania	Sub-Saharan Africa	Rural	Total Polluting	1990	0.749547	0.928125	0.992742
MEX	Mexico	Latin America & the Caribbean	Rural	Total Polluting	1990	0.413923	0.70809	0.940479
FSM	Micronesia, Federated States of	Oceania excluding Australia and New Zealand	Rural	Total Polluting	1990	0.0877857	0.39386	0.99999
MNG	Mongolia	Eastern Asia and South-eastern Asia	Rural	Total Polluting	1990	0.803985	0.985855	1
MNE	Montenegro	Northern America and Europe	Rural	Total Polluting	1990	0.0245418	0.5125	0.971421
MAR	Morocco	Western Asia and Northern Africa	Rural	Total Polluting	1990	0.011938	0.27217	0.842029
MOZ	Mozambique	Sub-Saharan Africa	Rural	Total Polluting	1990	0.84778	0.99418	1
MMR	Myanmar	Eastern Asia and South-eastern Asia	Rural	Total Polluting	1990	0.567623	0.99181	1
NAM	Namibia	Sub-Saharan Africa	Rural	Total Polluting	1990	0.788337	0.963935	0.99992
NPL	Nepal	Central Asia and Southern Asia	Rural	Total Polluting	1990	0.704789	0.93999	0.99421
NIC	Nicaragua	Latin America & the Caribbean	Rural	Total Polluting	1990	0.875348	0.96758	0.997521
NER	Niger	Sub-Saharan Africa	Rural	Total Polluting	1990	0.967349	0.99863	1
NGA	Nigeria	Sub-Saharan Africa	Rural	Total Polluting	1990	0.853823	0.99274	1
NIU	Niue	Oceania excluding Australia and New Zealand	Rural	Total Polluting	1990	0	0.078805	0.594716
PAK	Pakistan	Central Asia and Southern Asia	Rural	Total Polluting	1990	0.806144	0.977415	0.99978
PNG	Papua New Guinea	Oceania excluding Australia and New Zealand	Rural	Total Polluting	1990	0.821079	0.98407	1
PRY	Paraguay	Latin America & the Caribbean	Rural	Total Polluting	1990	0.778475	0.90322	0.976171
PER	Peru	Latin America & the Caribbean	Rural	Total Polluting	1990	0.807228	0.979135	0.99972
PHL	Philippines	Eastern Asia and South-eastern Asia	Rural	Total Polluting	1990	0.80931	0.928695	0.984801
MDA	Moldova, Republic of	Northern America and Europe	Rural	Total Polluting	1990	0.43608	0.910045	0.9979
RUS	Russian Federation	Northern America and Europe	Rural	Total Polluting	1990	0	0.00018	0.147981
RWA	Rwanda	Sub-Saharan Africa	Rural	Total Polluting	1990	0.972586	0.998375	1
LCA	Saint Lucia	Latin America & the Caribbean	Rural	Total Polluting	1990	0.00053975	0.16546	0.635236
VCT	Saint Vincent and the Grenadines	Latin America & the Caribbean	Rural	Total Polluting	1990	0	0.03202	0.224981
WSM	Samoa	Oceania excluding Australia and New Zealand	Rural	Total Polluting	1990	0.444732	0.916345	0.99936
STP	Sao Tome And Principe	Sub-Saharan Africa	Rural	Total Polluting	1990	0.91299	0.9997	1
SEN	Senegal	Sub-Saharan Africa	Rural	Total Polluting	1990	0.90816	0.98143	0.99952
SRB	Serbia	Northern America and Europe	Rural	Total Polluting	1990	0.096646	0.652525	0.986923
SLE	Sierra Leone	Sub-Saharan Africa	Rural	Total Polluting	1990	0.682366	0.99523	1
SLB	Solomon Islands	Oceania excluding Australia and New Zealand	Rural	Total Polluting	1990	0.44324	0.96382	1
SOM	Somalia	Sub-Saharan Africa	Rural	Total Polluting	1990	0.956164	0.99944	1
ZAF	South Africa	Sub-Saharan Africa	Rural	Total Polluting	1990	0.614579	0.802775	0.93425
SSD	South Sudan	Sub-Saharan Africa	Rural	Total Polluting	1990	0.687902	0.995955	1
LKA	Sri Lanka	Central Asia and Southern Asia	Rural	Total Polluting	1990	0.358644	0.83134	0.991958
SDN	Sudan	Western Asia and Northern Africa	Rural	Total Polluting	1990	0.66799	0.946875	0.9999
SUR	Suriname	Latin America & the Caribbean	Rural	Total Polluting	1990	0.0434875	0.46025	0.956743
SWZ	Eswatini	Sub-Saharan Africa	Rural	Total Polluting	1990	0.792604	0.95089	0.997782
SYR	Syrian Arab Republic	Western Asia and Northern Africa	Rural	Total Polluting	1990	0	0.021225	0.356177
TJK	Tajikistan	Central Asia and Southern Asia	Rural	Total Polluting	1990	0.678984	0.937625	0.99903
THA	Thailand	Eastern Asia and South-eastern Asia	Rural	Total Polluting	1990	0.484894	0.697305	0.855838
MKD	North Macedonia	Northern America and Europe	Rural	Total Polluting	1990	0.0547998	0.52812	0.973801
TLS	Timor-Leste	Eastern Asia and South-eastern Asia	Rural	Total Polluting	1990	0.841197	0.99924	1
TGO	Togo	Sub-Saharan Africa	Rural	Total Polluting	1990	0.932583	0.99989	1
TON	Tonga	Oceania excluding Australia and New Zealand	Rural	Total Polluting	1990	0.0623102	0.53609	0.970554
TUN	Tunisia	Western Asia and Northern Africa	Rural	Total Polluting	1990	0.0035395	0.20015	0.854989
TUR	Turkey	Western Asia and Northern Africa	Rural	Total Polluting	1990	0.00054975	0.132245	0.849449
TKM	Turkmenistan	Central Asia and Southern Asia	Rural	Total Polluting	1990	0	0.02936	0.291415
TUV	Tuvalu	Oceania excluding Australia and New Zealand	Rural	Total Polluting	1990	0.00112925	0.90378	1
UGA	Uganda	Sub-Saharan Africa	Rural	Total Polluting	1990	0.969006	0.99928	1
UKR	Ukraine	Northern America and Europe	Rural	Total Polluting	1990	0.0014595	0.163025	0.737485
TZA	Tanzania, United Republic of	Sub-Saharan Africa	Rural	Total Polluting	1990	0.965983	0.99966	1
UZB	Uzbekistan	Central Asia and Southern Asia	Rural	Total Polluting	1990	0.0266335	0.32987	0.871805
VUT	Vanuatu	Oceania excluding Australia and New Zealand	Rural	Total Polluting	1990	0.396612	0.95279	1
VEN	Venezuela (Bolivarian Republic of)	Latin America & the Caribbean	Rural	Total Polluting	1990	0	0.14645	0.823873
VNM	Viet Nam	Eastern Asia and South-eastern Asia	Rural	Total Polluting	1990	0.983899	0.99916	1
YEM	Yemen	Western Asia and Northern Africa	Rural	Total Polluting	1990	0.0894542	0.612675	0.978891
ZMB	Zambia	Sub-Saharan Africa	Rural	Total Polluting	1990	0.96257	0.99811	1
ZWE	Zimbabwe	Sub-Saharan Africa	Rural	Total Polluting	1990	0.632776	0.922925	0.997261
AFG	Afghanistan	Central Asia and Southern Asia	Rural	Total Clean	1990	0	0.00658	0.258475
ALB	Albania	Northern America and Europe	Rural	Total Clean	1990	0	0.07826	0.716263
DZA	Algeria	Western Asia and Northern Africa	Rural	Total Clean	1990	0.3389	0.950135	1
AGO	Angola	Sub-Saharan Africa	Rural	Total Clean	1990	4e-05	0.08565	0.688856
ARG	Argentina	Latin America & the Caribbean	Rural	Total Clean	1990	0.239418	0.502795	0.812849
ARM	Armenia	Western Asia and Northern Africa	Rural	Total Clean	1990	0.00262775	0.11579	0.60727
AZE	Azerbaijan	Western Asia and Northern Africa	Rural	Total Clean	1990	0.00541825	0.08012	0.328195
BGD	Bangladesh	Central Asia and Southern Asia	Rural	Total Clean	1990	0	0.008835	0.128521
BLR	Belarus	Northern America and Europe	Rural	Total Clean	1990	0.132592	0.805295	0.998981
BLZ	Belize	Latin America & the Caribbean	Rural	Total Clean	1990	0.26037	0.416245	0.5964
BEN	Benin	Sub-Saharan Africa	Rural	Total Clean	1990	0	0.00021	0.0120307
BTN	Bhutan	Central Asia and Southern Asia	Rural	Total Clean	1990	0	0.00628	0.121858
BOL	Bolivia (Plurinational State of)	Latin America & the Caribbean	Rural	Total Clean	1990	0.0445275	0.115675	0.231387
BIH	Bosnia and Herzegovina	Northern America and Europe	Rural	Total Clean	1990	0.0112495	0.361555	0.905154
BWA	Botswana	Sub-Saharan Africa	Rural	Total Clean	1990	0.00213875	0.07783	0.350804
BRA	Brazil	Latin America & the Caribbean	Rural	Total Clean	1990	0.163972	0.35029	0.58362
BFA	Burkina Faso	Sub-Saharan Africa	Rural	Total Clean	1990	0	0.00469	0.05588
BDI	Burundi	Sub-Saharan Africa	Rural	Total Clean	1990	0	0.0012	0.107773
CPV	Cabo Verde	Sub-Saharan Africa	Rural	Total Clean	1990	0.0843555	0.398655	0.808768
KHM	Cambodia	Eastern Asia and South-eastern Asia	Rural	Total Clean	1990	0	0.00439	0.068292
CMR	Cameroon	Sub-Saharan Africa	Rural	Total Clean	1990	2e-05	0.00993	0.121031
CAF	Central African Republic	Sub-Saharan Africa	Rural	Total Clean	1990	0	1e-05	0.0342353
TCD	Chad	Sub-Saharan Africa	Rural	Total Clean	1990	0	0.02241	0.435551
CHN	China	Eastern Asia and South-eastern Asia	Rural	Total Clean	1990	0.0151713	0.298595	0.818148
COL	Colombia	Latin America & the Caribbean	Rural	Total Clean	1990	0.120144	0.25485	0.420451
COM	Comoros	Sub-Saharan Africa	Rural	Total Clean	1990	0	0.00017	0.0140707
COG	Congo	Sub-Saharan Africa	Rural	Total Clean	1990	0	0.007985	0.216723
COK	Cook Islands	Oceania excluding Australia and New Zealand	Rural	Total Clean	1990	0	0.36767	0.99991
CRI	Costa Rica	Latin America & the Caribbean	Rural	Total Clean	1990	0.380471	0.783375	0.966297
CIV	Côte d'Ivoire	Sub-Saharan Africa	Rural	Total Clean	1990	0	0.02466	0.358179
PRK	Democratic Peoples Republic of Korea	Eastern Asia and South-eastern Asia	Rural	Total Clean	1990	0	0.009315	0.393699
COD	Democratic Republic of the Congo	Sub-Saharan Africa	Rural	Total Clean	1990	0	0.01079	0.486664
DJI	Djibouti	Sub-Saharan Africa	Rural	Total Clean	1990	0	0.01173	0.114439
DMA	Dominica	Latin America & the Caribbean	Rural	Total Clean	1990	0	0.17261	0.996854
DOM	Dominican Republic	Latin America & the Caribbean	Rural	Total Clean	1990	0.093687	0.20978	0.383164
ECU	Ecuador	Latin America & the Caribbean	Rural	Total Clean	1990	0.150274	0.46243	0.809218
EGY	Egypt	Western Asia and Northern Africa	Rural	Total Clean	1990	0.0539077	0.299555	0.754044
SLV	El Salvador	Latin America & the Caribbean	Rural	Total Clean	1990	0.00139	0.150125	0.621626
GNQ	Equatorial Guinea	Sub-Saharan Africa	Rural	Total Clean	1990	0	0.04447	0.690643
ERI	Eritrea	Sub-Saharan Africa	Rural	Total Clean	1990	0	0.00293	0.049044
ETH	Ethiopia	Sub-Saharan Africa	Rural	Total Clean	1990	0	0.015905	0.205868
FJI	Fiji	Oceania excluding Australia and New Zealand	Rural	Total Clean	1990	0.0005095	0.07911	0.460557
GAB	Gabon	Sub-Saharan Africa	Rural	Total Clean	1990	0.00144925	0.10644	0.52671
GMB	Gambia	Sub-Saharan Africa	Rural	Total Clean	1990	0.00022	0.03201	0.158109
GEO	Georgia	Western Asia and Northern Africa	Rural	Total Clean	1990	0	0.071055	0.557619
GHA	Ghana	Sub-Saharan Africa	Rural	Total Clean	1990	6e-05	0.00536	0.0328605
GRD	Grenada	Latin America & the Caribbean	Rural	Total Clean	1990	0.257154	0.846275	0.99731
GTM	Guatemala	Latin America & the Caribbean	Rural	Total Clean	1990	0.0399445	0.27567	0.690402
GIN	Guinea	Sub-Saharan Africa	Rural	Total Clean	1990	0	0.0009	0.0211845
[truncated: 125,921 more rows]

## Sheet: Population
iso3	country	region	area	fuel	year	population_lower95	population_median	population_upper95
AFG	Afghanistan	Central Asia and Southern Asia	Urban	Kerosene	1990	0	3.82607	439.291
ALB	Albania	Northern America and Europe	Urban	Kerosene	1990	0	0.848719	161.069
DZA	Algeria	Western Asia and Northern Africa	Urban	Kerosene	1990	0	2.6993	1256.11
AGO	Angola	Sub-Saharan Africa	Urban	Kerosene	1990	0	0.27126	170.494
ARG	Argentina	Latin America & the Caribbean	Urban	Kerosene	1990	0	37.8645	1920.02
ARM	Armenia	Western Asia and Northern Africa	Urban	Kerosene	1990	0	57.1675	858.012
AZE	Azerbaijan	Western Asia and Northern Africa	Urban	Kerosene	1990	0	232.679	1753.13
BGD	Bangladesh	Central Asia and Southern Asia	Urban	Kerosene	1990	106.418	584.42	1718.28
BLR	Belarus	Northern America and Europe	Urban	Kerosene	1990	0	0.40447	691.443
BLZ	Belize	Latin America & the Caribbean	Urban	Kerosene	1990	1.39476	7.30862	16.415
BEN	Benin	Sub-Saharan Africa	Urban	Kerosene	1990	52.5702	284.504	697.861
BTN	Bhutan	Central Asia and Southern Asia	Urban	Kerosene	1990	0.00878319	18.9219	71.4404
BOL	Bolivia (Plurinational State of)	Latin America & the Caribbean	Urban	Kerosene	1990	56.0879	219.829	516.9
BIH	Bosnia and Herzegovina	Northern America and Europe	Urban	Kerosene	1990	0	0.0175187	64.1849
BWA	Botswana	Sub-Saharan Africa	Urban	Kerosene	1990	12.8718	91.8097	222.469
BRA	Brazil	Latin America & the Caribbean	Urban	Kerosene	1990	0	14.3525	3979.9
BFA	Burkina Faso	Sub-Saharan Africa	Urban	Kerosene	1990	0.0121721	19.2441	180.592
BDI	Burundi	Sub-Saharan Africa	Urban	Kerosene	1990	0	0	4.95838
CPV	Cabo Verde	Sub-Saharan Africa	Urban	Kerosene	1990	0	0	4.3838
KHM	Cambodia	Eastern Asia and South-eastern Asia	Urban	Kerosene	1990	0.0976512	25.9892	189.369
CMR	Cameroon	Sub-Saharan Africa	Urban	Kerosene	1990	52.4922	515.769	1826.64
CAF	Central African Republic	Sub-Saharan Africa	Urban	Kerosene	1990	0	0.530459	102.577
TCD	Chad	Sub-Saharan Africa	Urban	Kerosene	1990	0	4.19021	139.942
CHN	China	Eastern Asia and South-eastern Asia	Urban	Kerosene	1990	0	0	6040.08
COL	Colombia	Latin America & the Caribbean	Urban	Kerosene	1990	1475.31	2852.1	4571.03
COM	Comoros	Sub-Saharan Africa	Urban	Kerosene	1990	0.888794	21.5791	81.905
COG	Congo	Sub-Saharan Africa	Urban	Kerosene	1990	0.304594	51.9566	494.335
COK	Cook Islands	Oceania excluding Australia and New Zealand	Urban	Kerosene	1990	0	0.110919	4.21643
CRI	Costa Rica	Latin America & the Caribbean	Urban	Kerosene	1990	0	0	41.7748
CIV	Côte d'Ivoire	Sub-Saharan Africa	Urban	Kerosene	1990	0	0.724021	248.602
PRK	Democratic Peoples Republic of Korea	Eastern Asia and South-eastern Asia	Urban	Kerosene	1990	0	453.24	6856.38
COD	Democratic Republic of the Congo	Sub-Saharan Africa	Urban	Kerosene	1990	0	1.27241	346.439
DJI	Djibouti	Sub-Saharan Africa	Urban	Kerosene	1990	326.337	413.761	444.714
DMA	Dominica	Latin America & the Caribbean	Urban	Kerosene	1990	0	0.0120795	5.6813
DOM	Dominican Republic	Latin America & the Caribbean	Urban	Kerosene	1990	0	0.119017	95.3258
ECU	Ecuador	Latin America & the Caribbean	Urban	Kerosene	1990	0	31.4106	793.781
EGY	Egypt	Western Asia and Northern Africa	Urban	Kerosene	1990	19.47	2073.06	12616.7
SLV	El Salvador	Latin America & the Caribbean	Urban	Kerosene	1990	0	19.5882	400.836
GNQ	Equatorial Guinea	Sub-Saharan Africa	Urban	Kerosene	1990	0.993576	62.5303	143.757
ERI	Eritrea	Sub-Saharan Africa	Urban	Kerosene	1990	191.053	375.317	523.585
ETH	Ethiopia	Sub-Saharan Africa	Urban	Kerosene	1990	401.624	1535.14	3262.6
FJI	Fiji	Oceania excluding Australia and New Zealand	Urban	Kerosene	1990	9.8102	90.9346	209.682
GAB	Gabon	Sub-Saharan Africa	Urban	Kerosene	1990	0	6.80441	184.869
GMB	Gambia	Sub-Saharan Africa	Urban	Kerosene	1990	0	0.021075	2.60285
GEO	Georgia	Western Asia and Northern Africa	Urban	Kerosene	1990	0	8.01019	468.466
GHA	Ghana	Sub-Saharan Africa	Urban	Kerosene	1990	86.1294	246.038	507.71
GRD	Grenada	Latin America & the Caribbean	Urban	Kerosene	1990	0	0.959083	13.9125
GTM	Guatemala	Latin America & the Caribbean	Urban	Kerosene	1990	0	0	94.3369
GIN	Guinea	Sub-Saharan Africa	Urban	Kerosene	1990	0	15.2376	202.332
GNB	Guinea-Bissau	Sub-Saharan Africa	Urban	Kerosene	1990	0	0	1.54824
GUY	Guyana	Latin America & the Caribbean	Urban	Kerosene	1990	26.3292	113.606	193.407
HTI	Haiti	Latin America & the Caribbean	Urban	Kerosene	1990	7.04352	171.739	853.616
HND	Honduras	Latin America & the Caribbean	Urban	Kerosene	1990	65.0094	564.628	1430.72
IND	India	Central Asia and Southern Asia	Urban	Kerosene	1990	32223.9	51523.9	75561.5
IDN	Indonesia	Eastern Asia and South-eastern Asia	Urban	Kerosene	1990	26480.1	36292.7	44485.2
IRN	Iran (Islamic Republic of)	Central Asia and Southern Asia	Urban	Kerosene	1990	0	686.659	17982.5
IRQ	Iraq	Western Asia and Northern Africa	Urban	Kerosene	1990	1.9483	2050.83	10358.1
JAM	Jamaica	Latin America & the Caribbean	Urban	Kerosene	1990	0	43.6901	528.747
JOR	Jordan	Western Asia and Northern Africa	Urban	Kerosene	1990	0	2.11377	163.518
KAZ	Kazakhstan	Central Asia and Southern Asia	Urban	Kerosene	1990	0	6.46805	614.951
KEN	Kenya	Sub-Saharan Africa	Urban	Kerosene	1990	1146.33	2697.92	3715.07
KIR	Kiribati	Oceania excluding Australia and New Zealand	Urban	Kerosene	1990	0.122102	9.85924	24.1631
KGZ	Kyrgyzstan	Central Asia and Southern Asia	Urban	Kerosene	1990	0	0.247794	141.06
LAO	Lao People's Democratic Republic	Eastern Asia and South-eastern Asia	Urban	Kerosene	1990	0	0	3.70857
LSO	Lesotho	Sub-Saharan Africa	Urban	Kerosene	1990	53.6632	135.7	194.132
LBR	Liberia	Sub-Saharan Africa	Urban	Kerosene	1990	0	10.6527	426.946
MDG	Madagascar	Sub-Saharan Africa	Urban	Kerosene	1990	0	2.54195	56.501
MWI	Malawi	Sub-Saharan Africa	Urban	Kerosene	1990	1.65558	56.7261	284.941
MYS	Malaysia	Eastern Asia and South-eastern Asia	Urban	Kerosene	1990	0	17.8741	1486.09
MDV	Maldives	Central Asia and Southern Asia	Urban	Kerosene	1990	0	1.35315	54.1464
MLI	Mali	Sub-Saharan Africa	Urban	Kerosene	1990	0	15.5476	241.405
MHL	Marshall Islands	Oceania excluding Australia and New Zealand	Urban	Kerosene	1990	4.32514	24.95	30.6847
MRT	Mauritania	Sub-Saharan Africa	Urban	Kerosene	1990	0	0.0319323	7.69728
MEX	Mexico	Latin America & the Caribbean	Urban	Kerosene	1990	0	6.7058	2794.41
FSM	Micronesia, Federated States of	Oceania excluding Australia and New Zealand	Urban	Kerosene	1990	0	22.3406	24.87
MNG	Mongolia	Eastern Asia and South-eastern Asia	Urban	Kerosene	1990	0	0.0249135	33.1315
MNE	Montenegro	Northern America and Europe	Urban	Kerosene	1990	0	0.047269	27.6637
MAR	Morocco	Western Asia and Northern Africa	Urban	Kerosene	1990	0	1.56511	803.643
MOZ	Mozambique	Sub-Saharan Africa	Urban	Kerosene	1990	0	1.5566	208.258
MMR	Myanmar	Eastern Asia and South-eastern Asia	Urban	Kerosene	1990	0	0.307657	263.152
NAM	Namibia	Sub-Saharan Africa	Urban	Kerosene	1990	0	2.17537	44.0094
NPL	Nepal	Central Asia and Southern Asia	Urban	Kerosene	1990	24.6344	491.8	1353.37
NIC	Nicaragua	Latin America & the Caribbean	Urban	Kerosene	1990	0.857887	75.923	305.115
NER	Niger	Sub-Saharan Africa	Urban	Kerosene	1990	0.0738869	20.91	160.137
NGA	Nigeria	Sub-Saharan Africa	Urban	Kerosene	1990	2196.09	12067.7	24142.1
NIU	Niue	Oceania excluding Australia and New Zealand	Urban	Kerosene	1990	0	0.0574956	0.578488
PAK	Pakistan	Central Asia and Southern Asia	Urban	Kerosene	1990	0	376.647	11538.8
PNG	Papua New Guinea	Oceania excluding Australia and New Zealand	Urban	Kerosene	1990	0.0129343	108.028	500.301
PRY	Paraguay	Latin America & the Caribbean	Urban	Kerosene	1990	0	0.656589	57.2023
PER	Peru	Latin America & the Caribbean	Urban	Kerosene	1990	3514.05	8506.21	12732.6
PHL	Philippines	Eastern Asia and South-eastern Asia	Urban	Kerosene	1990	2945.24	5625.11	9203.37
MDA	Moldova, Republic of	Northern America and Europe	Urban	Kerosene	1990	0	4.62234	310.79
RUS	Russian Federation	Northern America and Europe	Urban	Kerosene	1990	0	2.16605	2627.56
RWA	Rwanda	Sub-Saharan Africa	Urban	Kerosene	1990	0	1.13259	31.9876
LCA	Saint Lucia	Latin America & the Caribbean	Urban	Kerosene	1990	0	0.0105448	4.31424
VCT	Saint Vincent and the Grenadines	Latin America & the Caribbean	Urban	Kerosene	1990	0	0.0676658	4.92583
WSM	Samoa	Oceania excluding Australia and New Zealand	Urban	Kerosene	1990	0.0510842	9.00646	29.675
STP	Sao Tome And Principe	Sub-Saharan Africa	Urban	Kerosene	1990	0.0133977	7.05278	38.4422
SEN	Senegal	Sub-Saharan Africa	Urban	Kerosene	1990	0	0	32.5071
SRB	Serbia	Northern America and Europe	Urban	Kerosene	1990	0	1.94248	784.495
SLE	Sierra Leone	Sub-Saharan Africa	Urban	Kerosene	1990	0	63.8583	933.77
SLB	Solomon Islands	Oceania excluding Australia and New Zealand	Urban	Kerosene	1990	0	0	3.52268
SOM	Somalia	Sub-Saharan Africa	Urban	Kerosene	1990	0	6.3295	282.955
ZAF	South Africa	Sub-Saharan Africa	Urban	Kerosene	1990	1218.41	4225.81	8595.87
SSD	South Sudan	Sub-Saharan Africa	Urban	Kerosene	1990	0	0.00765828	81.483
LKA	Sri Lanka	Central Asia and Southern Asia	Urban	Kerosene	1990	2.08786	199.696	1395.06
SDN	Sudan	Western Asia and Northern Africa	Urban	Kerosene	1990	0	0.288211	50.1674
SUR	Suriname	Latin America & the Caribbean	Urban	Kerosene	1990	0	2.11241	81.4936
SWZ	Eswatini	Sub-Saharan Africa	Urban	Kerosene	1990	10.7943	32.0815	65.7317
SYR	Syrian Arab Republic	Western Asia and Northern Africa	Urban	Kerosene	1990	0	9.74406	1212.98
TJK	Tajikistan	Central Asia and Southern Asia	Urban	Kerosene	1990	0	0.150545	117.8
THA	Thailand	Eastern Asia and South-eastern Asia	Urban	Kerosene	1990	0	8.82382	686.169
MKD	North Macedonia	Northern America and Europe	Urban	Kerosene	1990	0	0.011536	168.757
TLS	Timor-Leste	Eastern Asia and South-eastern Asia	Urban	Kerosene	1990	0	7.27872	91.3135
TGO	Togo	Sub-Saharan Africa	Urban	Kerosene	1990	0	10.1497	190.794
TON	Tonga	Oceania excluding Australia and New Zealand	Urban	Kerosene	1990	0	0.565485	10.8244
TUN	Tunisia	Western Asia and Northern Africa	Urban	Kerosene	1990	0	161.531	2633.55
TUR	Turkey	Western Asia and Northern Africa	Urban	Kerosene	1990	0	67.0384	10774.3
TKM	Turkmenistan	Central Asia and Southern Asia	Urban	Kerosene	1990	0	0.0664217	78.7902
TUV	Tuvalu	Oceania excluding Australia and New Zealand	Urban	Kerosene	1990	0	1.51617	3.64714
UGA	Uganda	Sub-Saharan Africa	Urban	Kerosene	1990	0.366986	31.4063	227.773
UKR	Ukraine	Northern America and Europe	Urban	Kerosene	1990	0	20.9572	2469.11
TZA	Tanzania, United Republic of	Sub-Saharan Africa	Urban	Kerosene	1990	0	0	18.7097
UZB	Uzbekistan	Central Asia and Southern Asia	Urban	Kerosene	1990	0	0	339.078
VUT	Vanuatu	Oceania excluding Australia and New Zealand	Urban	Kerosene	1990	0	0.167128	11.5787
VEN	Venezuela (Bolivarian Republic of)	Latin America & the Caribbean	Urban	Kerosene	1990	0	96.0899	2996.79
VNM	Viet Nam	Eastern Asia and South-eastern Asia	Urban	Kerosene	1990	271.91	1182.63	2972.96
YEM	Yemen	Western Asia and Northern Africa	Urban	Kerosene	1990	0	97.5532	1482.49
ZMB	Zambia	Sub-Saharan Africa	Urban	Kerosene	1990	0	10.6919	168.702
ZWE	Zimbabwe	Sub-Saharan Africa	Urban	Kerosene	1990	0	20.9143	1341.47
AFG	Afghanistan	Central Asia and Southern Asia	Urban	Gas	1990	2.77552	363.062	2086.32
ALB	Albania	Northern America and Europe	Urban	Gas	1990	10.7076	281.996	960.513
DZA	Algeria	Western Asia and Northern Africa	Urban	Gas	1990	5845.1	12739.4	13493
AGO	Angola	Sub-Saharan Africa	Urban	Gas	1990	2442.86	3722.5	4388.77
ARG	Argentina	Latin America & the Caribbean	Urban	Gas	1990	23174.6	27129.4	28405.6
ARM	Armenia	Western Asia and Northern Africa	Urban	Gas	1990	10.2539	182.738	1003.37
AZE	Azerbaijan	Western Asia and Northern Africa	Urban	Gas	1990	1057.89	2514.88	3563.31
BGD	Bangladesh	Central Asia and Southern Asia	Urban	Gas	1990	2059.3	5258.52	9808.75
BLR	Belarus	Northern America and Europe	Urban	Gas	1990	1110.95	5277.25	6669.44
BLZ	Belize	Latin America & the Caribbean	Urban	Gas	1990	63.2214	75.2855	83.5021
BEN	Benin	Sub-Saharan Africa	Urban	Gas	1990	0	1.0816	61.8664
BTN	Bhutan	Central Asia and Southern Asia	Urban	Gas	1990	9.68317	57.2127	84.7291
BOL	Bolivia (Plurinational State of)	Latin America & the Caribbean	Urban	Gas	1990	2742.63	3148	3468.03
BIH	Bosnia and Herzegovina	Northern America and Europe	Urban	Gas	1990	4.69413	239.471	1234.52
BWA	Botswana	Sub-Saharan Africa	Urban	Gas	1990	98.2649	283.66	445.077
BRA	Brazil	Latin America & the Caribbean	Urban	Gas	1990	83769.1	99670	108670
BFA	Burkina Faso	Sub-Saharan Africa	Urban	Gas	1990	10.1512	95.5082	382.544
BDI	Burundi	Sub-Saharan Africa	Urban	Gas	1990	0	0.146032	39.7741
CPV	Cabo Verde	Sub-Saharan Africa	Urban	Gas	1990	99.8689	139.804	150.197
KHM	Cambodia	Eastern Asia and South-eastern Asia	Urban	Gas	1990	3.12414	55.3822	260.688
CMR	Cameroon	Sub-Saharan Africa	Urban	Gas	1990	46.0796	413.303	1684.27
CAF	Central African Republic	Sub-Saharan Africa	Urban	Gas	1990	0	1.39652	115.059
TCD	Chad	Sub-Saharan Africa	Urban	Gas	1990	0	28.3521	478.883
CHN	China	Eastern Asia and South-eastern Asia	Urban	Gas	1990	55459.6	198871	292625
COL	Colombia	Latin America & the Caribbean	Urban	Gas	1990	6747.58	8862.06	11133.4
COM	Comoros	Sub-Saharan Africa	Urban	Gas	1990	0	0.0607958	3.82939
COG	Congo	Sub-Saharan Africa	Urban	Gas	1990	0.596592	51.7246	475.349
COK	Cook Islands	Oceania excluding Australia and New Zealand	Urban	Gas	1990	2.44339	8.92391	10.5831
CRI	Costa Rica	Latin America & the Caribbean	Urban	Gas	1990	121.655	533.971	1110.26
CIV	Côte d'Ivoire	Sub-Saharan Africa	Urban	Gas	1990	235.68	2436.96	4447.21
PRK	Democratic Peoples Republic of Korea	Eastern Asia and South-eastern Asia	Urban	Gas	1990	0	63.5638	2928.01
COD	Democratic Republic of the Congo	Sub-Saharan Africa	Urban	Gas	1990	0	1.80257	659.856
DJI	Djibouti	Sub-Saharan Africa	Urban	Gas	1990	0.0223103	2.11668	17.8816
DMA	Dominica	Latin America & the Caribbean	Urban	Gas	1990	10.5231	42.5423	44.7386
DOM	Dominican Republic	Latin America & the Caribbean	Urban	Gas	1990	2596.11	3098.65	3549.47
ECU	Ecuador	Latin America & the Caribbean	Urban	Gas	1990	3914.81	5267.78	5611.75
EGY	Egypt	Western Asia and Northern Africa	Urban	Gas	1990	10909.5	21378.7	24607.2
SLV	El Salvador	Latin America & the Caribbean	Urban	Gas	1990	319.247	1324.44	2321.39
GNQ	Equatorial Guinea	Sub-Saharan Africa	Urban	Gas	1990	0.0236919	27.4826	126.231
ERI	Eritrea	Sub-Saharan Africa	Urban	Gas	1990	0.888603	17.5749	79.7569
ETH	Ethiopia	Sub-Saharan Africa	Urban	Gas	1990	0	24.8224	385.037
FJI	Fiji	Oceania excluding Australia and New Zealand	Urban	Gas	1990	31.4358	140.341	245.569
GAB	Gabon	Sub-Saharan Africa	Urban	Gas	1990	155.507	443.251	624.86
GMB	Gambia	Sub-Saharan Africa	Urban	Gas	1990	0	9.25719	57.6386
GEO	Georgia	Western Asia and Northern Africa	Urban	Gas	1990	66.8888	892.362	2422.44
GHA	Ghana	Sub-Saharan Africa	Urban	Gas	1990	95.9419	266.482	541.796
GRD	Grenada	Latin America & the Caribbean	Urban	Gas	1990	12.9367	28.4444	32.0636
GTM	Guatemala	Latin America & the Caribbean	Urban	Gas	1990	929.748	2548.92	3622.34
GIN	Guinea	Sub-Saharan Africa	Urban	Gas	1990	0	10.878	141.34
GNB	Guinea-Bissau	Sub-Saharan Africa	Urban	Gas	1990	0.0965894	20.4102	98.4382
GUY	Guyana	Latin America & the Caribbean	Urban	Gas	1990	13.0615	71.7269	159.353
HTI	Haiti	Latin America & the Caribbean	Urban	Gas	1990	1.45738	77.0693	579.589
HND	Honduras	Latin America & the Caribbean	Urban	Gas	1990	34.8968	337.981	1058.47
IND	India	Central Asia and Southern Asia	Urban	Gas	1990	41451.8	64663.9	91290.7
IDN	Indonesia	Eastern Asia and South-eastern Asia	Urban	Gas	1990	858.229	4363.28	11218.6
IRN	Iran (Islamic Republic of)	Central Asia and Southern Asia	Urban	Gas	1990	11130.4	29387	31663.6
IRQ	Iraq	Western Asia and Northern Africa	Urban	Gas	1990	1301.57	9134.81	12045.5
JAM	Jamaica	Latin America & the Caribbean	Urban	Gas	1990	535.295	1074.39	1197.17
JOR	Jordan	Western Asia and Northern Africa	Urban	Gas	1990	2274.8	2588.41	2609.6
KAZ	Kazakhstan	Central Asia and Southern Asia	Urban	Gas	1990	2091.9	6290.99	8898.09
KEN	Kenya	Sub-Saharan Africa	Urban	Gas	1990	0	1.72455	244.106
KIR	Kiribati	Oceania excluding Australia and New Zealand	Urban	Gas	1990	0	1.01923	15.4215
KGZ	Kyrgyzstan	Central Asia and Southern Asia	Urban	Gas	1990	105.672	923.494	1567.36
LAO	Lao People's Democratic Republic	Eastern Asia and South-eastern Asia	Urban	Gas	1990	0	0	9.03247
LSO	Lesotho	Sub-Saharan Africa	Urban	Gas	1990	6.83243	38.3023	105.687
LBR	Liberia	Sub-Saharan Africa	Urban	Gas	1990	0	5.51523	278.922
MDG	Madagascar	Sub-Saharan Africa	Urban	Gas	1990	2.26794	34.494	147.134
MWI	Malawi	Sub-Saharan Africa	Urban	Gas	1990	0	0.283658	12.0691
MYS	Malaysia	Eastern Asia and South-eastern Asia	Urban	Gas	1990	5384.4	8611.69	8979.55
MDV	Maldives	Central Asia and Southern Asia	Urban	Gas	1990	2.86307	54.8363	57.6778
MLI	Mali	Sub-Saharan Africa	Urban	Gas	1990	0	21.7962	257.445
MHL	Marshall Islands	Oceania excluding Australia and New Zealand	Urban	Gas	1990	0	0.153691	7.03081
MRT	Mauritania	Sub-Saharan Africa	Urban	Gas	1990	60.4877	200.327	436.143
MEX	Mexico	Latin America & the Caribbean	Urban	Gas	1990	54256.2	59997.1	60920.3
FSM	Micronesia, Federated States of	Oceania excluding Australia and New Zealand	Urban	Gas	1990	0	0.347931	5.4692
MNG	Mongolia	Eastern Asia and South-eastern Asia	Urban	Gas	1990	0	0.049827	19.246
MNE	Montenegro	Northern America and Europe	Urban	Gas	1990	0	3.47427	92.476
MAR	Morocco	Western Asia and Northern Africa	Urban	Gas	1990	9202.32	11775	12038.3
MOZ	Mozambique	Sub-Saharan Africa	Urban	Gas	1990	0.0993574	98.1154	1157.3
MMR	Myanmar	Eastern Asia and South-eastern Asia	Urban	Gas	1990	0	5.89676	643.175
NAM	Namibia	Sub-Saharan Africa	Urban	Gas	1990	0.00782506	42.0186	227.433
NPL	Nepal	Central Asia and Southern Asia	Urban	Gas	1990	0.381417	28.1062	290.037
NIC	Nicaragua	Latin America & the Caribbean	Urban	Gas	1990	346.557	645.01	1054.26
NER	Niger	Sub-Saharan Africa	Urban	Gas	1990	0.935285	29.6471	150.766
NGA	Nigeria	Sub-Saharan Africa	Urban	Gas	1990	31.6693	1156.35	8560.7
NIU	Niue	Oceania excluding Australia and New Zealand	Urban	Gas	1990	7.2e-06	0.36094	0.718359
PAK	Pakistan	Central Asia and Southern Asia	Urban	Gas	1990	6038.25	17746	28208.3
PNG	Papua New Guinea	Oceania excluding Australia and New Zealand	Urban	Gas	1990	0.355533	61.6127	307.042
PRY	Paraguay	Latin America & the Caribbean	Urban	Gas	1990	1163.9	1468.32	1740.33
PER	Peru	Latin America & the Caribbean	Urban	Gas	1990	1425.01	4926.39	10026.3
PHL	Philippines	Eastern Asia and South-eastern Asia	Urban	Gas	1990	5371.98	9117.44	13470.1
MDA	Moldova, Republic of	Northern America and Europe	Urban	Gas	1990	590.495	1541.6	1967.55
RUS	Russian Federation	Northern America and Europe	Urban	Gas	1990	20417.5	66903.4	100942
RWA	Rwanda	Sub-Saharan Africa	Urban	Gas	1990	0	1.96341	48.2196
LCA	Saint Lucia	Latin America & the Caribbean	Urban	Gas	1990	1.33591	18.1274	40.2818
VCT	Saint Vincent and the Grenadines	Latin America & the Caribbean	Urban	Gas	1990	29.3116	42.079	44.5112
WSM	Samoa	Oceania excluding Australia and New Zealand	Urban	Gas	1990	0.0504109	3.76183	22.5072
STP	Sao Tome And Principe	Sub-Saharan Africa	Urban	Gas	1990	0	0.0780494	9.46478
SEN	Senegal	Sub-Saharan Africa	Urban	Gas	1990	483.088	995.367	1661.45
SRB	Serbia	Northern America and Europe	Urban	Gas	1990	2.63673	501.327	3078.42
SLE	Sierra Leone	Sub-Saharan Africa	Urban	Gas	1990	0	0	252.845
SLB	Solomon Islands	Oceania excluding Australia and New Zealand	Urban	Gas	1990	0.713454	15.688	39.0634
SOM	Somalia	Sub-Saharan Africa	Urban	Gas	1990	0	0.0219393	33.927
ZAF	South Africa	Sub-Saharan Africa	Urban	Gas	1990	67.8175	695.424	2110.03
SSD	South Sudan	Sub-Saharan Africa	Urban	Gas	1990	0	7.7655	520.101
LKA	Sri Lanka	Central Asia and Southern Asia	Urban	Gas	1990	216.805	1519.19	2844.26
SDN	Sudan	Western Asia and Northern Africa	Urban	Gas	1990	17.1154	507.135	2774.1
SUR	Suriname	Latin America & the Caribbean	Urban	Gas	1990	51.609	210.734	264.465
SWZ	Eswatini	Sub-Saharan Africa	Urban	Gas	1990	5.0217	17.1244	42.6504
SYR	Syrian Arab Republic	Western Asia and Northern Africa	Urban	Gas	1990	2551.34	5717.6	6087.85
TJK	Tajikistan	Central Asia and Southern Asia	Urban	Gas	1990	119.67	625.931	1333.85
THA	Thailand	Eastern Asia and South-eastern Asia	Urban	Gas	1990	9764.61	12712.3	15084
MKD	North Macedonia	Northern America and Europe	Urban	Gas	1990	0	24.9121	652.405
TLS	Timor-Leste	Eastern Asia and South-eastern Asia	Urban	Gas	1990	0	1.25844	47.8495
TGO	Togo	Sub-Saharan Africa	Urban	Gas	1990	0	1.60231	66.7891
TON	Tonga	Oceania excluding Australia and New Zealand	Urban	Gas	1990	2.51781	14.9414	21.1027
TUN	Tunisia	Western Asia and Northern Africa	Urban	Gas	1990	1692.1	4286.54	4761.17
TUR	Turkey	Western Asia and Northern Africa	Urban	Gas	1990	7054.83	28540	31854.1
TKM	Turkmenistan	Central Asia and Southern Asia	Urban	Gas	1990	1340.19	1640.45	1660.54
TUV	Tuvalu	Oceania excluding Australia and New Zealand	Urban	Gas	1990	0	0.424548	3.56034
UGA	Uganda	Sub-Saharan Africa	Urban	Gas	1990	0	1.77698	148.877
UKR	Ukraine	Northern America and Europe	Urban	Gas	1990	13666.7	29834.5	33996.4
TZA	Tanzania, United Republic of	Sub-Saharan Africa	Urban	Gas	1990	0	0	11.8766
UZB	Uzbekistan	Central Asia and Southern Asia	Urban	Gas	1990	3777.9	7761.02	8455.32
VUT	Vanuatu	Oceania excluding Australia and New Zealand	Urban	Gas	1990	0.86158	12.8522	25.3304
VEN	Venezuela (Bolivarian Republic of)	Latin America & the Caribbean	Urban	Gas	1990	9924.95	15603.4	16715.5
VNM	Viet Nam	Eastern Asia and South-eastern Asia	Urban	Gas	1990	0	43.2485	536.558
YEM	Yemen	Western Asia and Northern Africa	Urban	Gas	1990	528.019	2077.3	2504.56
ZMB	Zambia	Sub-Saharan Africa	Urban	Gas	1990	0	0.22143	35.0832
ZWE	Zimbabwe	Sub-Saharan Africa	Urban	Gas	1990	0	6.80417	293.131
AFG	Afghanistan	Central Asia and Southern Asia	Urban	Electricity	1990	0.440971	282.623	1877
ALB	Albania	Northern America and Europe	Urban	Electricity	1990	3.99257	189.079	845.892
DZA	Algeria	Western Asia and Northern Africa	Urban	Electricity	1990	0	146.235	5138.07
AGO	Angola	Sub-Saharan Africa	Urban	Electricity	1990	0	20.2767	290.751
ARG	Argentina	Latin America & the Caribbean	Urban	Electricity	1990	0	12.5266	1265.7
ARM	Armenia	Western Asia and Northern Africa	Urban	Electricity	1990	394.708	1545.11	2227.09
AZE	Azerbaijan	Western Asia and Northern Africa	Urban	Electricity	1990	54.4978	578.72	1843.02
BGD	Bangladesh	Central Asia and Southern Asia	Urban	Electricity	1990	106.002	1093.53	3500.71
BLR	Belarus	Northern America and Europe	Urban	Electricity	1990	4.10874	928.696	5139.97
BLZ	Belize	Latin America & the Caribbean	Urban	Electricity	1990	0.00267063	0.987688	5.86246
BEN	Benin	Sub-Saharan Africa	Urban	Electricity	1990	0	0	3.55384
BTN	Bhutan	Central Asia and Southern Asia	Urban	Electricity	1990	0	0.471078	13.628
BOL	Bolivia (Plurinational State of)	Latin America & the Caribbean	Urban	Electricity	1990	17.6789	86.8035	229.205
BIH	Bosnia and Herzegovina	Northern America and Europe	Urban	Electricity	1990	155.846	1060.22	1648.85
BWA	Botswana	Sub-Saharan Africa	Urban	Electricity	1990	4.21535	38.0915	114.993
BRA	Brazil	Latin America & the Caribbean	Urban	Electricity	1990	0	252.273	4635.64
BFA	Burkina Faso	Sub-Saharan Africa	Urban	Electricity	1990	0	1.54585	42.7365
BDI	Burundi	Sub-Saharan Africa	Urban	Electricity	1990	0	0.154522	45.8252
CPV	Cabo Verde	Sub-Saharan Africa	Urban	Electricity	1990	0	0	0.805593
KHM	Cambodia	Eastern Asia and South-eastern Asia	Urban	Electricity	1990	0	0.446405	11.9574
CMR	Cameroon	Sub-Saharan Africa	Urban	Electricity	1990	0	0.929188	98.4022
CAF	Central African Republic	Sub-Saharan Africa	Urban	Electricity	1990	0	15.8975	449.175
TCD	Chad	Sub-Saharan Africa	Urban	Electricity	1990	0	20.9758	355.927
CHN	China	Eastern Asia and South-eastern Asia	Urban	Electricity	1990	0	2287.96	39202.9
COL	Colombia	Latin America & the Caribbean	Urban	Electricity	1990	7749.43	10039.3	12313.6
COM	Comoros	Sub-Saharan Africa	Urban	Electricity	1990	0	0	0.0711769
COG	Congo	Sub-Saharan Africa	Urban	Electricity	1990	1.12657	79.539	636.011
COK	Cook Islands	Oceania excluding Australia and New Zealand	Urban	Electricity	1990	0	0.392773	6.00642
CRI	Costa Rica	Latin America & the Caribbean	Urban	Electricity	1990	349.976	912.745	1366.84
CIV	Côte d'Ivoire	Sub-Saharan Africa	Urban	Electricity	1990	0	8.71239	526.251
PRK	Democratic Peoples Republic of Korea	Eastern Asia and South-eastern Asia	Urban	Electricity	1990	0	20.0229	1814.52
COD	Democratic Republic of the Congo	Sub-Saharan Africa	Urban	Electricity	1990	0.212068	1046.13	7593.76
DJI	Djibouti	Sub-Saharan Africa	Urban	Electricity	1990	0.277926	15.5679	78.2501
DMA	Dominica	Latin America & the Caribbean	Urban	Electricity	1990	0	0.00581607	5.00297
DOM	Dominican Republic	Latin America & the Caribbean	Urban	Electricity	1990	0	1.46788	72.4616
ECU	Ecuador	Latin America & the Caribbean	Urban	Electricity	1990	0	28.0613	419.889
EGY	Egypt	Western Asia and Northern Africa	Urban	Electricity	1990	0	254.983	3887.29
SLV	El Salvador	Latin America & the Caribbean	Urban	Electricity	1990	0	140.458	719.72
GNQ	Equatorial Guinea	Sub-Saharan Africa	Urban	Electricity	1990	0	1.25986	60.8633
ERI	Eritrea	Sub-Saharan Africa	Urban	Electricity	1990	0.141111	4.20538	28.2318
ETH	Ethiopia	Sub-Saharan Africa	Urban	Electricity	1990	0	111.397	952.862
FJI	Fiji	Oceania excluding Australia and New Zealand	Urban	Electricity	1990	0.00303191	7.02948	49.9876
GAB	Gabon	Sub-Saharan Africa	Urban	Electricity	1990	0	0	0.730972
GMB	Gambia	Sub-Saharan Africa	Urban	Electricity	1990	0	0.0105375	4.4823
GEO	Georgia	Western Asia and Northern Africa	Urban	Electricity	1990	92.7544	1115.23	2523.51
GHA	Ghana	Sub-Saharan Africa	Urban	Electricity	1990	29.1043	100.324	233.707
GRD	Grenada	Latin America & the Caribbean	Urban	Electricity	1990	0	0.362875	9.31794
GTM	Guatemala	Latin America & the Caribbean	Urban	Electricity	1990	0	21.7647	1264.11
GIN	Guinea	Sub-Saharan Africa	Urban	Electricity	1990	0.0677229	21.5782	174.082
GNB	Guinea-Bissau	Sub-Saharan Africa	Urban	Electricity	1990	0	0.0905038	12.3211
GUY	Guyana	Latin America & the Caribbean	Urban	Electricity	1990	0.492505	13.8818	72.423
HTI	Haiti	Latin America & the Caribbean	Urban	Electricity	1990	0	0.506036	32.9126
HND	Honduras	Latin America & the Caribbean	Urban	Electricity	1990	29.8123	286.164	957.075
IND	India	Central Asia and Southern Asia	Urban	Electricity	1990	0	60.0201	4368.24
IDN	Indonesia	Eastern Asia and South-eastern Asia	Urban	Electricity	1990	137.605	963.33	3008.28
IRN	Iran (Islamic Republic of)	Central Asia and Southern Asia	Urban	Electricity	1990	0	80.1313	7080.96
IRQ	Iraq	Western Asia and Northern Africa	Urban	Electricity	1990	0	16.5606	1210.51
JAM	Jamaica	Latin America & the Caribbean	Urban	Electricity	1990	0	16.4092	161.729
JOR	Jordan	Western Asia and Northern Africa	Urban	Electricity	1990	0	1.43528	186.971
KAZ	Kazakhstan	Central Asia and Southern Asia	Urban	Electricity	1990	89.6174	2102.02	6343.63
KEN	Kenya	Sub-Saharan Africa	Urban	Electricity	1990	0	2.17529	267.742
KIR	Kiribati	Oceania excluding Australia and New Zealand	Urban	Electricity	1990	0	0.0331888	4.47968
KGZ	Kyrgyzstan	Central Asia and Southern Asia	Urban	Electricity	1990	0.991175	164.337	1020.9
LAO	Lao People's Democratic Republic	Eastern Asia and South-eastern Asia	Urban	Electricity	1990	0	0	131.505
LSO	Lesotho	Sub-Saharan Africa	Urban	Electricity	1990	0	0.527558	21.2802
LBR	Liberia	Sub-Saharan Africa	Urban	Electricity	1990	0	1.36573	157.189
MDG	Madagascar	Sub-Saharan Africa	Urban	Electricity	1990	0	35.355	164.796
MWI	Malawi	Sub-Saharan Africa	Urban	Electricity	1990	20.608	133.832	417.12
MYS	Malaysia	Eastern Asia and South-eastern Asia	Urban	Electricity	1990	0	34.0866	2059.62
MDV	Maldives	Central Asia and Southern Asia	Urban	Electricity	1990	0	0.0360494	4.51031
MLI	Mali	Sub-Saharan Africa	Urban	Electricity	1990	0	0.0197429	29.917
MHL	Marshall Islands	Oceania excluding Australia and New Zealand	Urban	Electricity	1990	0	1.7966	18.0667
MRT	Mauritania	Sub-Saharan Africa	Urban	Electricity	1990	0	5.08522	89.3906
MEX	Mexico	Latin America & the Caribbean	Urban	Electricity	1990	0	224.949	1845.97
FSM	Micronesia, Federated States of	Oceania excluding Australia and New Zealand	Urban	Electricity	1990	0	0.0729935	21.2962
MNG	Mongolia	Eastern Asia and South-eastern Asia	Urban	Electricity	1990	147.959	628.972	1087.16
MNE	Montenegro	Northern America and Europe	Urban	Electricity	1990	50.1591	227.915	290.338
MAR	Morocco	Western Asia and Northern Africa	Urban	Electricity	1990	0	12.3403	965.993
MOZ	Mozambique	Sub-Saharan Africa	Urban	Electricity	1990	0.0993574	86.3581	927.427
MMR	Myanmar	Eastern Asia and South-eastern Asia	Urban	Electricity	1990	0	291.659	4275.22
NAM	Namibia	Sub-Saharan Africa	Urban	Electricity	1990	104.057	276.438	375.773
NPL	Nepal	Central Asia and Southern Asia	Urban	Electricity	1990	0	0.730461	37.5374
NIC	Nicaragua	Latin America & the Caribbean	Urban	Electricity	1990	0	60.0081	188.211
NER	Niger	Sub-Saharan Africa	Urban	Electricity	1990	0.369127	13.5151	83.5439
NGA	Nigeria	Sub-Saharan Africa	Urban	Electricity	1990	0.282761	172.767	3213.29
NIU	Niue	Oceania excluding Australia and New Zealand	Urban	Electricity	1990	0	0.0157356	0.657771
PAK	Pakistan	Central Asia and Southern Asia	Urban	Electricity	1990	0	10.8648	372.4
PNG	Papua New Guinea	Oceania excluding Australia and New Zealand	Urban	Electricity	1990	0.568949	66.738	319.057
PRY	Paraguay	Latin America & the Caribbean	Urban	Electricity	1990	0	2.91362	33.2214
PER	Peru	Latin America & the Caribbean	Urban	Electricity	1990	3.75968	117.603	852.726
PHL	Philippines	Eastern Asia and South-eastern Asia	Urban	Electricity	1990	412.438	1527.21	3460.64
MDA	Moldova, Republic of	Northern America and Europe	Urban	Electricity	1990	2.01985	174.251	909.678
RUS	Russian Federation	Northern America and Europe	Urban	Electricity	1990	6675.34	40481.3	86688.8
RWA	Rwanda	Sub-Saharan Africa	Urban	Electricity	1990	0	7.87911	80.3724
LCA	Saint Lucia	Latin America & the Caribbean	Urban	Electricity	1990	0	0.190821	5.3427
VCT	Saint Vincent and the Grenadines	Latin America & the Caribbean	Urban	Electricity	1990	0	0.119528	5.99158
WSM	Samoa	Oceania excluding Australia and New Zealand	Urban	Electricity	1990	0.00723362	5.83264	26.0868
STP	Sao Tome And Principe	Sub-Saharan Africa	Urban	Electricity	1990	0	0	0.317219
SEN	Senegal	Sub-Saharan Africa	Urban	Electricity	1990	0	1.82207	58.5569
SRB	Serbia	Northern America and Europe	Urban	Electricity	1990	433.952	2909.59	4509.25
SLE	Sierra Leone	Sub-Saharan Africa	Urban	Electricity	1990	0	0.53054	457.572
SLB	Solomon Islands	Oceania excluding Australia and New Zealand	Urban	Electricity	1990	0	0.285535	8.6504
SOM	Somalia	Sub-Saharan Africa	Urban	Electricity	1990	0	0.877574	118.682
ZAF	South Africa	Sub-Saharan Africa	Urban	Electricity	1990	8686.49	12838.3	16287.9
SSD	South Sudan	Sub-Saharan Africa	Urban	Electricity	1990	0	0	0.566904
LKA	Sri Lanka	Central Asia and Southern Asia	Urban	Electricity	1990	0	91.4645	1537.9
SDN	Sudan	Western Asia and Northern Africa	Urban	Electricity	1990	0	0.172926	38.1648
SUR	Suriname	Latin America & the Caribbean	Urban	Electricity	1990	0	3.00798	69.2845
SWZ	Eswatini	Sub-Saharan Africa	Urban	Electricity	1990	27.4287	57.0878	96.0014
SYR	Syrian Arab Republic	Western Asia and Northern Africa	Urban	Electricity	1990	0	74.0244	2585.36
TJK	Tajikistan	Central Asia and Southern Asia	Urban	Electricity	1990	51.2011	416.189	1153.04
THA	Thailand	Eastern Asia and South-eastern Asia	Urban	Electricity	1990	84.0594	839.262	2498.09
MKD	North Macedonia	Northern America and Europe	Urban	Electricity	1990	20.7461	494.55	1086.09
TLS	Timor-Leste	Eastern Asia and South-eastern Asia	Urban	Electricity	1990	0	1.48254	47.4081
TGO	Togo	Sub-Saharan Africa	Urban	Electricity	1990	0	0.0649583	14.3214
TON	Tonga	Oceania excluding Australia and New Zealand	Urban	Electricity	1990	0	0.92962	12.2212
TUN	Tunisia	Western Asia and Northern Africa	Urban	Electricity	1990	0	23.4235	922.867
TUR	Turkey	Western Asia and Northern Africa	Urban	Electricity	1990	0	482.197	16505.9
TKM	Turkmenistan	Central Asia and Southern Asia	Urban	Electricity	1990	0	7.63019	294.055
TUV	Tuvalu	Oceania excluding Australia and New Zealand	Urban	Electricity	1990	0	0.00472269	1.29545
UGA	Uganda	Sub-Saharan Africa	Urban	Electricity	1990	2.33712	86.232	370.479
UKR	Ukraine	Northern America and Europe	Urban	Electricity	1990	0	771.981	9799.93
TZA	Tanzania, United Republic of	Sub-Saharan Africa	Urban	Electricity	1990	0	2.452	133.49
UZB	Uzbekistan	Central Asia and Southern Asia	Urban	Electricity	1990	0	206.15	3166.27
VUT	Vanuatu	Oceania excluding Australia and New Zealand	Urban	Electricity	1990	0	0.917694	12.1651
VEN	Venezuela (Bolivarian Republic of)	Latin America & the Caribbean	Urban	Electricity	1990	0	510.582	5064.58
VNM	Viet Nam	Eastern Asia and South-eastern Asia	Urban	Electricity	1990	0.414523	117.448	673.199
YEM	Yemen	Western Asia and Northern Africa	Urban	Electricity	1990	0	30.1076	938.808
ZMB	Zambia	Sub-Saharan Africa	Urban	Electricity	1990	553.456	888.614	1271.99
ZWE	Zimbabwe	Sub-Saharan Africa	Urban	Electricity	1990	1317.59	2659.03	2921.55
AFG	Afghanistan	Central Asia and Southern Asia	Urban	Biomass	1990	30.3226	897.168	2350.53
ALB	Albania	Northern America and Europe	Urban	Biomass	1990	18.9925	548.996	1135.57
DZA	Algeria	Western Asia and Northern Africa	Urban	Biomass	1990	0	29.7598	4768.19
AGO	Angola	Sub-Saharan Africa	Urban	Biomass	1990	17.4024	265.744	1009.32
ARG	Argentina	Latin America & the Caribbean	Urban	Biomass	1990	1.99287	910.314	4345.6
ARM	Armenia	Western Asia and Northern Africa	Urban	Biomass	1990	0	235.302	1490.69
AZE	Azerbaijan	Western Asia and Northern Africa	Urban	Biomass	1990	0	129.984	1382.93
BGD	Bangladesh	Central Asia and Southern Asia	Urban	Biomass	1990	8604.02	13716.6	18045.9
BLR	Belarus	Northern America and Europe	Urban	Biomass	1990	0	66.7375	2794.43
BLZ	Belize	Latin America & the Caribbean	Urban	Biomass	1990	0.33828	4.35713	13.3545
BEN	Benin	Sub-Saharan Africa	Urban	Biomass	1990	946.013	1403.14	1648.64
BTN	Bhutan	Central Asia and Southern Asia	Urban	Biomass	1990	0.0140883	4.80104	33.0192
BOL	Bolivia (Plurinational State of)	Latin America & the Caribbean	Urban	Biomass	1990	95.1057	319.588	650.607
BIH	Bosnia and Herzegovina	Northern America and Europe	Urban	Biomass	1990	0.262342	94.1278	907.206
BWA	Botswana	Sub-Saharan Africa	Urban	Biomass	1990	0.554689	132.47	405.73
BRA	Brazil	Latin America & the Caribbean	Urban	Biomass	1990	991.042	8927.82	24004.8
BFA	Burkina Faso	Sub-Saharan Africa	Urban	Biomass	1990	676.17	1024.37	1172.37
BDI	Burundi	Sub-Saharan Africa	Urban	Biomass	1990	8.74527	140.085	313.928
CPV	Cabo Verde	Sub-Saharan Africa	Urban	Biomass	1990	0.38611	9.73515	49.6393
KHM	Cambodia	Eastern Asia and South-eastern Asia	Urban	Biomass	1990	632.355	1055.69	1297.49
CMR	Cameroon	Sub-Saharan Africa	Urban	Biomass	1990	1696.54	3592.45	4496.71
CAF	Central African Republic	Sub-Saharan Africa	Urban	Biomass	1990	224.238	929.321	1081.27
TCD	Chad	Sub-Saharan Africa	Urban	Biomass	1990	0.0123971	198.917	1153.33
CHN	China	Eastern Asia and South-eastern Asia	Urban	Biomass	1990	545.639	17169	101196
COL	Colombia	Latin America & the Caribbean	Urban	Biomass	1990	300.254	1435.76	3468.8
COM	Comoros	Sub-Saharan Africa	Urban	Biomass	1990	30.6547	90.2123	112.782
COG	Congo	Sub-Saharan Africa	Urban	Biomass	1990	16.4225	373.878	1096.32
COK	Cook Islands	Oceania excluding Australia and New Zealand	Urban	Biomass	1990	0	0.00397275	5.55447
CRI	Costa Rica	Latin America & the Caribbean	Urban	Biomass	1990	0	44.5079	397.316
CIV	Côte d'Ivoire	Sub-Saharan Africa	Urban	Biomass	1990	48.1196	949.747	3444.4
PRK	Democratic Peoples Republic of Korea	Eastern Asia and South-eastern Asia	Urban	Biomass	1990	64.4346	4398.87	11072.8
COD	Democratic Republic of the Congo	Sub-Saharan Africa	Urban	Biomass	1990	134.016	3823.79	9508.89
DJI	Djibouti	Sub-Saharan Africa	Urban	Biomass	1990	0	8.71785	66.4995
DMA	Dominica	Latin America & the Caribbean	Urban	Biomass	1990	0	0.00805302	22.5414
DOM	Dominican Republic	Latin America & the Caribbean	Urban	Biomass	1990	25.9011	110.607	296.634
ECU	Ecuador	Latin America & the Caribbean	Urban	Biomass	1990	0	66.3676	1278.6
EGY	Egypt	Western Asia and Northern Africa	Urban	Biomass	1990	0	99.4719	4085.22
SLV	El Salvador	Latin America & the Caribbean	Urban	Biomass	1990	34.5927	900.993	2126.56
GNQ	Equatorial Guinea	Sub-Saharan Africa	Urban	Biomass	1990	0	13.4743	128.731
ERI	Eritrea	Sub-Saharan Africa	Urban	Biomass	1990	25.7024	144.81	326.975
ETH	Ethiopia	Sub-Saharan Africa	Urban	Biomass	1990	2135.31	3850.39	5208.15
FJI	Fiji	Oceania excluding Australia and New Zealand	Urban	Biomass	1990	0.00606382	34.5016	215.909
GAB	Gabon	Sub-Saharan Africa	Urban	Biomass	1990	11.8174	161.953	472.633
GMB	Gambia	Sub-Saharan Africa	Urban	Biomass	1990	275.393	335.693	350.997
GEO	Georgia	Western Asia and Northern Africa	Urban	Biomass	1990	1.22088	494.905	2309.64
GHA	Ghana	Sub-Saharan Africa	Urban	Biomass	1990	901.357	1651.21	2474.53
GRD	Grenada	Latin America & the Caribbean	Urban	Biomass	1990	0	0	0.125244
GTM	Guatemala	Latin America & the Caribbean	Urban	Biomass	1990	191.287	1126.69	2694.72
GIN	Guinea	Sub-Saharan Africa	Urban	Biomass	1990	346.444	820.293	1292.59
GNB	Guinea-Bissau	Sub-Saharan Africa	Urban	Biomass	1990	5.41642	125.43	264.274
GUY	Guyana	Latin America & the Caribbean	Urban	Biomass	1990	0	1.92406	31.3704
HTI	Haiti	Latin America & the Caribbean	Urban	Biomass	1990	1.6598	318.54	1384.2
HND	Honduras	Latin America & the Caribbean	Urban	Biomass	1990	39.8109	564.899	1596.7
IND	India	Central Asia and Southern Asia	Urban	Biomass	1990	49845.2	79287.7	110795
IDN	Indonesia	Eastern Asia and South-eastern Asia	Urban	Biomass	1990	6252.47	13021.3	21507.5
IRN	Iran (Islamic Republic of)	Central Asia and Southern Asia	Urban	Biomass	1990	0	3.16725	4397.94
IRQ	Iraq	Western Asia and Northern Africa	Urban	Biomass	1990	0	104.539	4860.03
JAM	Jamaica	Latin America & the Caribbean	Urban	Biomass	1990	0	0.22774	248.533
JOR	Jordan	Western Asia and Northern Africa	Urban	Biomass	1990	0	0	78.0015
KAZ	Kazakhstan	Central Asia and Southern Asia	Urban	Biomass	1990	0	54.3502	1429.98
KEN	Kenya	Sub-Saharan Africa	Urban	Biomass	1990	22.6044	401.566	1583.33
KIR	Kiribati	Oceania excluding Australia and New Zealand	Urban	Biomass	1990	0.0498909	10.0001	24.9353
KGZ	Kyrgyzstan	Central Asia and Southern Asia	Urban	Biomass	1990	0	9.92001	437.124
LAO	Lao People's Democratic Republic	Eastern Asia and South-eastern Asia	Urban	Biomass	1990	269.041	445.446	576.006
LSO	Lesotho	Sub-Saharan Africa	Urban	Biomass	1990	2.19844	31.3734	118.297
LBR	Liberia	Sub-Saharan Africa	Urban	Biomass	1990	1.41774	139.153	845.524
MDG	Madagascar	Sub-Saharan Africa	Urban	Biomass	1990	527.217	1289.41	2075.03
MWI	Malawi	Sub-Saharan Africa	Urban	Biomass	1990	408.282	733.239	961.546
MYS	Malaysia	Eastern Asia and South-eastern Asia	Urban	Biomass	1990	0	3.50297	779.51
MDV	Maldives	Central Asia and Southern Asia	Urban	Biomass	1990	0	0	2.11809
MLI	Mali	Sub-Saharan Africa	Urban	Biomass	1990	1537.14	1905.96	1973.5
MHL	Marshall Islands	Oceania excluding Australia and New Zealand	Urban	Biomass	1990	0	0.745225	19.8228
MRT	Mauritania	Sub-Saharan Africa	Urban	Biomass	1990	36.2252	180.761	403.599
MEX	Mexico	Latin America & the Caribbean	Urban	Biomass	1990	0	234.093	5105.63
FSM	Micronesia, Federated States of	Oceania excluding Australia and New Zealand	Urban	Biomass	1990	0	0.0004974	22.5121
MNG	Mongolia	Eastern Asia and South-eastern Asia	Urban	Biomass	1990	94.5663	458.246	931.018
MNE	Montenegro	Northern America and Europe	Urban	Biomass	1990	0.0443146	18.302	165.808
MAR	Morocco	Western Asia and Northern Africa	Urban	Biomass	1990	0	55.3807	2162.3
MOZ	Mozambique	Sub-Saharan Africa	Urban	Biomass	1990	213.83	1513	2986.24
MMR	Myanmar	Eastern Asia and South-eastern Asia	Urban	Biomass	1990	251.079	4605.98	9388.43
NAM	Namibia	Sub-Saharan Africa	Urban	Biomass	1990	1.11507	33.37	154.459
NPL	Nepal	Central Asia and Southern Asia	Urban	Biomass	1990	218.596	1099.25	1616.35
NIC	Nicaragua	Latin America & the Caribbean	Urban	Biomass	1990	880.863	1322.61	1707.08
NER	Niger	Sub-Saharan Africa	Urban	Biomass	1990	932.011	1147.23	1227.18
NGA	Nigeria	Sub-Saharan Africa	Urban	Biomass	1990	1881.29	12313.4	24337.4
NIU	Niue	Oceania excluding Australia and New Zealand	Urban	Biomass	1990	0	1.44e-05	0.0258138
PAK	Pakistan	Central Asia and Southern Asia	Urban	Biomass	1990	3844.89	13164	24768.9
PNG	Papua New Guinea	Oceania excluding Australia and New Zealand	Urban	Biomass	1990	6.51163	316.481	632.981
PRY	Paraguay	Latin America & the Caribbean	Urban	Biomass	1990	155.67	320.118	538.441
PER	Peru	Latin America & the Caribbean	Urban	Biomass	1990	45.4095	856.757	4386.77
PHL	Philippines	Eastern Asia and South-eastern Asia	Urban	Biomass	1990	5191.6	10618	16121.3
MDA	Moldova, Republic of	Northern America and Europe	Urban	Biomass	1990	0	156.802	1139.85
RUS	Russian Federation	Northern America and Europe	Urban	Biomass	1990	0	0	3448.35
RWA	Rwanda	Sub-Saharan Africa	Urban	Biomass	1990	6.64434	72.072	230.947
LCA	Saint Lucia	Latin America & the Caribbean	Urban	Biomass	1990	0	1.79627	16.4841
VCT	Saint Vincent and the Grenadines	Latin America & the Caribbean	Urban	Biomass	1990	0	0.122867	7.64098
WSM	Samoa	Oceania excluding Australia and New Zealand	Urban	Biomass	1990	0.0255507	6.46848	30.8738
STP	Sao Tome And Principe	Sub-Saharan Africa	Urban	Biomass	1990	3.77846	32.0557	48.5552
SEN	Senegal	Sub-Saharan Africa	Urban	Biomass	1990	185.495	483.599	971.668
SRB	Serbia	Northern America and Europe	Urban	Biomass	1990	2.44488	543.318	3377.51
SLE	Sierra Leone	Sub-Saharan Africa	Urban	Biomass	1990	136.78	829.269	1353.9
SLB	Solomon Islands	Oceania excluding Australia and New Zealand	Urban	Biomass	1990	1.92721	24.1978	41.6188
SOM	Somalia	Sub-Saharan Africa	Urban	Biomass	1990	42.7642	659.848	1833.87
ZAF	South Africa	Sub-Saharan Africa	Urban	Biomass	1990	38.2992	343.314	1240.03
SSD	South Sudan	Sub-Saharan Africa	Urban	Biomass	1990	22.4277	522.693	763.877
LKA	Sri Lanka	Central Asia and Southern Asia	Urban	Biomass	1990	25.4037	713.423	2584.72
SDN	Sudan	Western Asia and Northern Africa	Urban	Biomass	1990	2771.13	5211.16	5744.33
SUR	Suriname	Latin America & the Caribbean	Urban	Biomass	1990	0.0106424	21.8497	179.365
SWZ	Eswatini	Sub-Saharan Africa	Urban	Biomass	1990	5.22185	23.649	59.5373
SYR	Syrian Arab Republic	Western Asia and Northern Africa	Urban	Biomass	1990	0	10.1095	1093.55
TJK	Tajikistan	Central Asia and Southern Asia	Urban	Biomass	1990	26.5841	436.504	1270.36
THA	Thailand	Eastern Asia and South-eastern Asia	Urban	Biomass	1990	1.3319	559.48	2233.98
MKD	North Macedonia	Northern America and Europe	Urban	Biomass	1990	8.59232	455.402	1078.55
TLS	Timor-Leste	Eastern Asia and South-eastern Asia	Urban	Biomass	1990	23.6039	135.891	156.659
TGO	Togo	Sub-Saharan Africa	Urban	Biomass	1990	3.57136	173.899	807.783
TON	Tonga	Oceania excluding Australia and New Zealand	Urban	Biomass	1990	0	1.7321	15.8372
TUN	Tunisia	Western Asia and Northern Africa	Urban	Biomass	1990	0	2.19446	494.721
TUR	Turkey	Western Asia and Northern Africa	Urban	Biomass	1990	0	150.836	9699.14
TKM	Turkmenistan	Central Asia and Southern Asia	Urban	Biomass	1990	0	0	30.2621
TUV	Tuvalu	Oceania excluding Australia and New Zealand	Urban	Biomass	1990	0	0.230314	3.58995
UGA	Uganda	Sub-Saharan Africa	Urban	Biomass	1990	275.217	648.145	1092.1
UKR	Ukraine	Northern America and Europe	Urban	Biomass	1990	0	274.849	7903.95
TZA	Tanzania, United Republic of	Sub-Saharan Africa	Urban	Biomass	1990	4126.42	4574.47	4762.65
UZB	Uzbekistan	Central Asia and Southern Asia	Urban	Biomass	1990	0	76.8987	2238.5
VUT	Vanuatu	Oceania excluding Australia and New Zealand	Urban	Biomass	1990	0.329014	8.88001	25.3787
VEN	Venezuela (Bolivarian Republic of)	Latin America & the Caribbean	Urban	Biomass	1990	0	2.51106	1093.83
VNM	Viet Nam	Eastern Asia and South-eastern Asia	Urban	Biomass	1990	5501.12	8320.02	10754.1
YEM	Yemen	Western Asia and Northern Africa	Urban	Biomass	1990	0	61.1237	1308.14
ZMB	Zambia	Sub-Saharan Africa	Urban	Biomass	1990	290.548	487.842	760.427
ZWE	Zimbabwe	Sub-Saharan Africa	Urban	Biomass	1990	1.12025	129.412	764.621
AFG	Afghanistan	Central Asia and Southern Asia	Urban	Charcoal	1990	0.389092	225.686	1793.95
ALB	Albania	Northern America and Europe	Urban	Charcoal	1990	0	0.0119538	42.8316
DZA	Algeria	Western Asia and Northern Africa	Urban	Charcoal	1990	0	0	855.503
AGO	Angola	Sub-Saharan Africa	Urban	Charcoal	1990	38.0962	406.031	1288.07
ARG	Argentina	Latin America & the Caribbean	Urban	Charcoal	1990	0	0	15.3736
ARM	Armenia	Western Asia and Northern Africa	Urban	Charcoal	1990	0	26.8841	598.062
AZE	Azerbaijan	Western Asia and Northern Africa	Urban	Charcoal	1990	0	15.124	377.846
BGD	Bangladesh	Central Asia and Southern Asia	Urban	Charcoal	1990	0	0.210374	433.398
BLR	Belarus	Northern America and Europe	Urban	Charcoal	1990	0	0	14.5626
BLZ	Belize	Latin America & the Caribbean	Urban	Charcoal	1990	0	0	0.0293992
BEN	Benin	Sub-Saharan Africa	Urban	Charcoal	1990	0	0.0515049	230.991
BTN	Bhutan	Central Asia and Southern Asia	Urban	Charcoal	1990	0	0	0.0088052
BOL	Bolivia (Plurinational State of)	Latin America & the Caribbean	Urban	Charcoal	1990	0	0	0.0771629
BIH	Bosnia and Herzegovina	Northern America and Europe	Urban	Charcoal	1990	0	0.437967	304.393
BWA	Botswana	Sub-Saharan Africa	Urban	Charcoal	1990	0	0	4.70388
BRA	Brazil	Latin America & the Caribbean	Urban	Charcoal	1990	0	58.5141	3242.62
BFA	Burkina Faso	Sub-Saharan Africa	Urban	Charcoal	1990	0.997502	36.851	188.517
BDI	Burundi	Sub-Saharan Africa	Urban	Charcoal	1990	18.6901	181.186	322.544
CPV	Cabo Verde	Sub-Saharan Africa	Urban	Charcoal	1990	0	0	0.49988
KHM	Cambodia	Eastern Asia and South-eastern Asia	Urban	Charcoal	1990	34.1479	212.866	618.764
CMR	Cameroon	Sub-Saharan Africa	Urban	Charcoal	1990	0	0	205.124
CAF	Central African Republic	Sub-Saharan Africa	Urban	Charcoal	1990	0	40.9266	644.165
TCD	Chad	Sub-Saharan Africa	Urban	Charcoal	1990	1.53631	452.319	1156.07
CHN	China	Eastern Asia and South-eastern Asia	Urban	Charcoal	1990	0	0	2827.4
COL	Colombia	Latin America & the Caribbean	Urban	Charcoal	1990	0	0	507.045
COM	Comoros	Sub-Saharan Africa	Urban	Charcoal	1990	0	0.504146	13.4109
COG	Congo	Sub-Saharan Africa	Urban	Charcoal	1990	34.9162	513.136	1148.89
COK	Cook Islands	Oceania excluding Australia and New Zealand	Urban	Charcoal	1990	0	0	0.0938761
CRI	Costa Rica	Latin America & the Caribbean	Urban	Charcoal	1990	0	0	4.93845
CIV	Côte d'Ivoire	Sub-Saharan Africa	Urban	Charcoal	1990	61.7276	895.3	3283.93
PRK	Democratic Peoples Republic of Korea	Eastern Asia and South-eastern Asia	Urban	Charcoal	1990	0	0.355436	495.572
COD	Democratic Republic of the Congo	Sub-Saharan Africa	Urban	Charcoal	1990	176.538	4054.79	9500.34
DJI	Djibouti	Sub-Saharan Africa	Urban	Charcoal	1990	0	0.224224	6.2784
DMA	Dominica	Latin America & the Caribbean	Urban	Charcoal	1990	0	0.0232643	16.7755
DOM	Dominican Republic	Latin America & the Caribbean	Urban	Charcoal	1990	0	0	830.854
ECU	Ecuador	Latin America & the Caribbean	Urban	Charcoal	1990	0	0	204.459
EGY	Egypt	Western Asia and Northern Africa	Urban	Charcoal	1990	0	0	22.9834
SLV	El Salvador	Latin America & the Caribbean	Urban	Charcoal	1990	0	11.2635	252.714
GNQ	Equatorial Guinea	Sub-Saharan Africa	Urban	Charcoal	1990	0	0	1.38103
ERI	Eritrea	Sub-Saharan Africa	Urban	Charcoal	1990	0.205854	25.4235	115.516
ETH	Ethiopia	Sub-Saharan Africa	Urban	Charcoal	1990	7.03858	271.802	1252.7
FJI	Fiji	Oceania excluding Australia and New Zealand	Urban	Charcoal	1990	0	0	0.988478
GAB	Gabon	Sub-Saharan Africa	Urban	Charcoal	1990	0	0	7.84137
GMB	Gambia	Sub-Saharan Africa	Urban	Charcoal	1990	0	1.37339	34.4998
GEO	Georgia	Western Asia and Northern Africa	Urban	Charcoal	1990	0	0.0297776	69.2978
GHA	Ghana	Sub-Saharan Africa	Urban	Charcoal	1990	2145.53	2994.89	3820.09
GRD	Grenada	Latin America & the Caribbean	Urban	Charcoal	1990	0	0.315725	9.03882
GTM	Guatemala	Latin America & the Caribbean	Urban	Charcoal	1990	0	0.0389002	35.4196
GIN	Guinea	Sub-Saharan Africa	Urban	Charcoal	1990	297.773	758.285	1245.3
GNB	Guinea-Bissau	Sub-Saharan Africa	Urban	Charcoal	1990	28.1946	151.611	281.316
GUY	Guyana	Latin America & the Caribbean	Urban	Charcoal	1990	0	0	6.19125
HTI	Haiti	Latin America & the Caribbean	Urban	Charcoal	1990	294.18	1263.84	1882.86
HND	Honduras	Latin America & the Caribbean	Urban	Charcoal	1990	0	0	0.822523
IND	India	Central Asia and Southern Asia	Urban	Charcoal	1990	0	4.44593	10878.4
IDN	Indonesia	Eastern Asia and South-eastern Asia	Urban	Charcoal	1990	1.66474	133.734	728.629
IRN	Iran (Islamic Republic of)	Central Asia and Southern Asia	Urban	Charcoal	1990	0	0	433.683
IRQ	Iraq	Western Asia and Northern Africa	Urban	Charcoal	1990	0	0	29.8578
JAM	Jamaica	Latin America & the Caribbean	Urban	Charcoal	1990	0	0.22774	50.4063
JOR	Jordan	Western Asia and Northern Africa	Urban	Charcoal	1990	0	0	22.9403
KAZ	Kazakhstan	Central Asia and Southern Asia	Urban	Charcoal	1990	0	21.1724	599.318
KEN	Kenya	Sub-Saharan Africa	Urban	Charcoal	1990	68.891	645.512	1866.17
KIR	Kiribati	Oceania excluding Australia and New Zealand	Urban	Charcoal	1990	0	0	0.799826
KGZ	Kyrgyzstan	Central Asia and Southern Asia	Urban	Charcoal	1990	0	40.6464	839.286
LAO	Lao People's Democratic Republic	Eastern Asia and South-eastern Asia	Urban	Charcoal	1990	3.52746	45.1451	140.86
LSO	Lesotho	Sub-Saharan Africa	Urban	Charcoal	1990	0	0	0.0403229
LBR	Liberia	Sub-Saharan Africa	Urban	Charcoal	1990	186.274	883.36	1142.03
MDG	Madagascar	Sub-Saharan Africa	Urban	Charcoal	1990	555.017	1325.89	2068.17
MWI	Malawi	Sub-Saharan Africa	Urban	Charcoal	1990	14.3007	111.363	384.554
MYS	Malaysia	Eastern Asia and South-eastern Asia	Urban	Charcoal	1990	0	1.25748	441.823
MDV	Maldives	Central Asia and Southern Asia	Urban	Charcoal	1990	0	0	0.441273
MLI	Mali	Sub-Saharan Africa	Urban	Charcoal	1990	0	0	135.082
MHL	Marshall Islands	Oceania excluding Australia and New Zealand	Urban	Charcoal	1990	0	0.00153845	1.38946
MRT	Mauritania	Sub-Saharan Africa	Urban	Charcoal	1990	162.413	373.42	596.4
MEX	Mexico	Latin America & the Caribbean	Urban	Charcoal	1990	0	1.82885	172.522
FSM	Micronesia, Federated States of	Oceania excluding Australia and New Zealand	Urban	Charcoal	1990	0	0	0.150781
MNG	Mongolia	Eastern Asia and South-eastern Asia	Urban	Charcoal	1990	0	0.0124567	5.96834
MNE	Montenegro	Northern America and Europe	Urban	Charcoal	1990	0	0.738577	29.6791
MAR	Morocco	Western Asia and Northern Africa	Urban	Charcoal	1990	0	0	50.7155
MOZ	Mozambique	Sub-Saharan Africa	Urban	Charcoal	1990	162.583	1262.53	2747.08
MMR	Myanmar	Eastern Asia and South-eastern Asia	Urban	Charcoal	1990	405.689	4494.3	9463.44
NAM	Namibia	Sub-Saharan Africa	Urban	Charcoal	1990	0	0.547754	11.7238
NPL	Nepal	Central Asia and Southern Asia	Urban	Charcoal	1990	0	0	36.4749
NIC	Nicaragua	Latin America & the Caribbean	Urban	Charcoal	1990	0	16.5198	177.502
NER	Niger	Sub-Saharan Africa	Urban	Charcoal	1990	0	0.11083	40.273
NGA	Nigeria	Sub-Saharan Africa	Urban	Charcoal	1990	0	2.26209	2694.64
NIU	Niue	Oceania excluding Australia and New Zealand	Urban	Charcoal	1990	0	0.0001152	0.137395
PAK	Pakistan	Central Asia and Southern Asia	Urban	Charcoal	1990	0	0	982.484
PNG	Papua New Guinea	Oceania excluding Australia and New Zealand	Urban	Charcoal	1990	0	0	12.8766
PRY	Paraguay	Latin America & the Caribbean	Urban	Charcoal	1990	114.133	244.2	413.274
PER	Peru	Latin America & the Caribbean	Urban	Charcoal	1990	0	5.11317	198.267
PHL	Philippines	Eastern Asia and South-eastern Asia	Urban	Charcoal	1990	445.314	1703.31	3914.24
MDA	Moldova, Republic of	Northern America and Europe	Urban	Charcoal	1990	0	0	41.9817
RUS	Russian Federation	Northern America and Europe	Urban	Charcoal	1990	0	0	8.66421
RWA	Rwanda	Sub-Saharan Africa	Urban	Charcoal	1990	132.563	286.24	374.51
LCA	Saint Lucia	Latin America & the Caribbean	Urban	Charcoal	1990	0	15.8509	33.855
VCT	Saint Vincent and the Grenadines	Latin America & the Caribbean	Urban	Charcoal	1990	0	0.00222585	0.948357
WSM	Samoa	Oceania excluding Australia and New Zealand	Urban	Charcoal	1990	0	0	0.830511
STP	Sao Tome And Principe	Sub-Saharan Africa	Urban	Charcoal	1990	0.00099426	4.00538	31.9934
SEN	Senegal	Sub-Saharan Africa	Urban	Charcoal	1990	1.14541	1365.12	1929.88
SRB	Serbia	Northern America and Europe	Urban	Charcoal	1990	0	0.19185	104.767
SLE	Sierra Leone	Sub-Saharan Africa	Urban	Charcoal	1990	7.35407	216.116	919.916
SLB	Solomon Islands	Oceania excluding Australia and New Zealand	Urban	Charcoal	1990	0	0.00042649	5.58219
SOM	Somalia	Sub-Saharan Africa	Urban	Charcoal	1990	305.774	1455.62	2122.31
ZAF	South Africa	Sub-Saharan Africa	Urban	Charcoal	1990	0	0	36.1638
SSD	South Sudan	Sub-Saharan Africa	Urban	Charcoal	1990	0.00765828	136.605	685.664
LKA	Sri Lanka	Central Asia and Southern Asia	Urban	Charcoal	1990	0	0.32121	199.369
SDN	Sudan	Western Asia and Northern Africa	Urban	Charcoal	1990	0	0	475.352
SUR	Suriname	Latin America & the Caribbean	Urban	Charcoal	1990	0	2.14186	72.1073
SWZ	Eswatini	Sub-Saharan Africa	Urban	Charcoal	1990	0	0	1.39231
SYR	Syrian Arab Republic	Western Asia and Northern Africa	Urban	Charcoal	1990	0	0	16.201
TJK	Tajikistan	Central Asia and Southern Asia	Urban	Charcoal	1990	0	4.28216	157.322
THA	Thailand	Eastern Asia and South-eastern Asia	Urban	Charcoal	1990	343.442	2144.69	4668.9
MKD	North Macedonia	Northern America and Europe	Urban	Charcoal	1990	0	0.369153	111.121
TLS	Timor-Leste	Eastern Asia and South-eastern Asia	Urban	Charcoal	1990	0	0.148881	30.8824
TGO	Togo	Sub-Saharan Africa	Urban	Charcoal	1990	238.638	849.709	1063.86
TON	Tonga	Oceania excluding Australia and New Zealand	Urban	Charcoal	1990	0	0	0.203953
TUN	Tunisia	Western Asia and Northern Africa	Urban	Charcoal	1990	0	6.67879	929.073
TUR	Turkey	Western Asia and Northern Africa	Urban	Charcoal	1990	0	0	73.1516
TKM	Turkmenistan	Central Asia and Southern Asia	Urban	Charcoal	1990	0	0	8.65267
TUV	Tuvalu	Oceania excluding Australia and New Zealand	Urban	Charcoal	1990	0	0	0.0868078
UGA	Uganda	Sub-Saharan Africa	Urban	Charcoal	1990	630.154	1078.24	1494.57
UKR	Ukraine	Northern America and Europe	Urban	Charcoal	1990	0	3.43561	1623.78
TZA	Tanzania, United Republic of	Sub-Saharan Africa	Urban	Charcoal	1990	34.3737	212.194	630.659
UZB	Uzbekistan	Central Asia and Southern Asia	Urban	Charcoal	1990	0	0.677149	384.119
VUT	Vanuatu	Oceania excluding Australia and New Zealand	Urban	Charcoal	1990	0	0.00713518	2.82889
VEN	Venezuela (Bolivarian Republic of)	Latin America & the Caribbean	Urban	Charcoal	1990	0	0	5.02212
VNM	Viet Nam	Eastern Asia and South-eastern Asia	Urban	Charcoal	1990	223.383	3568.97	6322.67
YEM	Yemen	Western Asia and Northern Africa	Urban	Charcoal	1990	0	0	49.5911
ZMB	Zambia	Sub-Saharan Africa	Urban	Charcoal	1990	1362.84	1730.21	2073.66
ZWE	Zimbabwe	Sub-Saharan Africa	Urban	Charcoal	1990	0	0.0590384	11.4859
AFG	Afghanistan	Central Asia and Southern Asia	Urban	Coal	1990	0	0.207516	325.996
ALB	Albania	Northern America and Europe	Urban	Coal	1990	0	0	1.90125
DZA	Algeria	Western Asia and Northern Africa	Urban	Coal	1990	0	0	14.0397
AGO	Angola	Sub-Saharan Africa	Urban	Coal	1990	0	0	13.6591
ARG	Argentina	Latin America & the Caribbean	Urban	Coal	1990	0	0	15.943
ARM	Armenia	Western Asia and Northern Africa	Urban	Coal	1990	0	0	22.5468
AZE	Azerbaijan	Western Asia and Northern Africa	Urban	Coal	1990	0	0	11.6038
BGD	Bangladesh	Central Asia and Southern Asia	Urban	Coal	1990	0	0	29.2473
BLR	Belarus	Northern America and Europe	Urban	Coal	1990	0	0	12.7408
BLZ	Belize	Latin America & the Caribbean	Urban	Coal	1990	0	0.00089021	0.463109
BEN	Benin	Sub-Saharan Africa	Urban	Coal	1990	0	0	0.789741
BTN	Bhutan	Central Asia and Southern Asia	Urban	Coal	1990	0	0	0.473896
BOL	Bolivia (Plurinational State of)	Latin America & the Caribbean	Urban	Coal	1990	0	0	10.3741
BIH	Bosnia and Herzegovina	Northern America and Europe	Urban	Coal	1990	0	62.7081	707.46
BWA	Botswana	Sub-Saharan Africa	Urban	Coal	1990	0	0.109782	12.3306
BRA	Brazil	Latin America & the Caribbean	Urban	Coal	1990	0	0	16.5606
BFA	Burkina Faso	Sub-Saharan Africa	Urban	Coal	1990	0	0.0243442	26.9426
BDI	Burundi	Sub-Saharan Africa	Urban	Coal	1990	0	0.456774	36.4546
CPV	Cabo Verde	Sub-Saharan Africa	Urban	Coal	1990	0	0	0.0165923
KHM	Cambodia	Eastern Asia and South-eastern Asia	Urban	Coal	1990	0	0.0139502	7.18434
CMR	Cameroon	Sub-Saharan Africa	Urban	Coal	1990	0	0	0.743351
CAF	Central African Republic	Sub-Saharan Africa	Urban	Coal	1990	0	0.205688	46.1743
TCD	Chad	Sub-Saharan Africa	Urban	Coal	1990	0	102.152	1004.96
CHN	China	Eastern Asia and South-eastern Asia	Urban	Coal	1990	7290.64	75437.7	209918
COL	Colombia	Latin America & the Caribbean	Urban	Coal	1990	0	306.106	1006.58
COM	Comoros	Sub-Saharan Africa	Urban	Coal	1990	0	0	0.751459
COG	Congo	Sub-Saharan Africa	Urban	Coal	1990	0	0.0132576	108.831
COK	Cook Islands	Oceania excluding Australia and New Zealand	Urban	Coal	1990	0	0	0.0805462
CRI	Costa Rica	Latin America & the Caribbean	Urban	Coal	1990	0	0	0.123848
CIV	Côte d'Ivoire	Sub-Saharan Africa	Urban	Coal	1990	0	0	334.472
PRK	Democratic Peoples Republic of Korea	Eastern Asia and South-eastern Asia	Urban	Coal	1990	209.689	4868.17	11166.2
COD	Democratic Republic of the Congo	Sub-Saharan Africa	Urban	Coal	1990	0	2.86291	654.417
DJI	Djibouti	Sub-Saharan Africa	Urban	Coal	1990	0	0	0.0448449
DMA	Dominica	Latin America & the Caribbean	Urban	Coal	1990	0	0.0223695	9.0249
DOM	Dominican Republic	Latin America & the Caribbean	Urban	Coal	1990	0.0396724	662.271	1139.76
ECU	Ecuador	Latin America & the Caribbean	Urban	Coal	1990	0	0	24.0027
EGY	Egypt	Western Asia and Northern Africa	Urban	Coal	1990	0	0.998463	714.032
SLV	El Salvador	Latin America & the Caribbean	Urban	Coal	1990	0	0	3.49688
GNQ	Equatorial Guinea	Sub-Saharan Africa	Urban	Coal	1990	0	0.246188	37.4615
ERI	Eritrea	Sub-Saharan Africa	Urban	Coal	1990	0	0	2.83797
ETH	Ethiopia	Sub-Saharan Africa	Urban	Coal	1990	0	0.0606905	15.4199
FJI	Fiji	Oceania excluding Australia and New Zealand	Urban	Coal	1990	0	0	1.00985
GAB	Gabon	Sub-Saharan Africa	Urban	Coal	1990	0	0	0.151593
GMB	Gambia	Sub-Saharan Africa	Urban	Coal	1990	0	0	1.00826
GEO	Georgia	Western Asia and Northern Africa	Urban	Coal	1990	0	0	19.3629
GHA	Ghana	Sub-Saharan Africa	Urban	Coal	1990	0	0.746298	125.832
GRD	Grenada	Latin America & the Caribbean	Urban	Coal	1990	0	0	0.19197
GTM	Guatemala	Latin America & the Caribbean	Urban	Coal	1990	0	0	29.2539
GIN	Guinea	Sub-Saharan Africa	Urban	Coal	1990	0	0.0677229	74.2391
GNB	Guinea-Bissau	Sub-Saharan Africa	Urban	Coal	1990	0	0.0124833	6.47578
GUY	Guyana	Latin America & the Caribbean	Urban	Coal	1990	0	1.45239	30.4613
HTI	Haiti	Latin America & the Caribbean	Urban	Coal	1990	0	0.344105	63.3967
HND	Honduras	Latin America & the Caribbean	Urban	Coal	1990	0	0.0801972	46.0412
IND	India	Central Asia and Southern Asia	Urban	Coal	1990	9227.98	22365.3	37449.6
IDN	Indonesia	Eastern Asia and South-eastern Asia	Urban	Coal	1990	0	0	54.3954
IRN	Iran (Islamic Republic of)	Central Asia and Southern Asia	Urban	Coal	1990	0	0	674.821
IRQ	Iraq	Western Asia and Northern Africa	Urban	Coal	1990	0	0	21.9215
JAM	Jamaica	Latin America & the Caribbean	Urban	Coal	1990	0	0	2.49435
JOR	Jordan	Western Asia and Northern Africa	Urban	Coal	1990	0	0	0.86182
KAZ	Kazakhstan	Central Asia and Southern Asia	Urban	Coal	1990	0	158.956	1826.36
KEN	Kenya	Sub-Saharan Africa	Urban	Coal	1990	0	0	21.793
KIR	Kiribati	Oceania excluding Australia and New Zealand	Urban	Coal	1990	0	0	0.979844
KGZ	Kyrgyzstan	Central Asia and Southern Asia	Urban	Coal	1990	0	141.358	1154.67
LAO	Lao People's Democratic Republic	Eastern Asia and South-eastern Asia	Urban	Coal	1990	0	0	2.89261
LSO	Lesotho	Sub-Saharan Africa	Urban	Coal	1990	0	0.056004	6.69169
LBR	Liberia	Sub-Saharan Africa	Urban	Coal	1990	0	0.528857	108.936
MDG	Madagascar	Sub-Saharan Africa	Urban	Coal	1990	0	0.163997	32.1823
MWI	Malawi	Sub-Saharan Africa	Urban	Coal	1990	0	0.0436397	5.06275
MYS	Malaysia	Eastern Asia and South-eastern Asia	Urban	Coal	1990	0	0	8.71476
MDV	Maldives	Central Asia and Southern Asia	Urban	Coal	1990	0	0	0.450069
MLI	Mali	Sub-Saharan Africa	Urban	Coal	1990	0	0	1.63916
MHL	Marshall Islands	Oceania excluding Australia and New Zealand	Urban	Coal	1990	0	0	0.103399
MRT	Mauritania	Sub-Saharan Africa	Urban	Coal	1990	0	0	9.96567
MEX	Mexico	Latin America & the Caribbean	Urban	Coal	1990	0	0	5.48656
FSM	Micronesia, Federated States of	Oceania excluding Australia and New Zealand	Urban	Coal	1990	0	0	0.184598
MNG	Mongolia	Eastern Asia and South-eastern Asia	Urban	Coal	1990	10.6212	105.913	427.739
MNE	Montenegro	Northern America and Europe	Urban	Coal	1990	0.0206063	12.8409	121.118
MAR	Morocco	Western Asia and Northern Africa	Urban	Coal	1990	0	0.240786	143.788
MOZ	Mozambique	Sub-Saharan Africa	Urban	Coal	1990	0	4.3386	224.043
MMR	Myanmar	Eastern Asia and South-eastern Asia	Urban	Coal	1990	0	6.87101	575.993
NAM	Namibia	Sub-Saharan Africa	Urban	Coal	1990	0	0.0234752	7.43527
NPL	Nepal	Central Asia and Southern Asia	Urban	Coal	1990	0	0	2.65622
NIC	Nicaragua	Latin America & the Caribbean	Urban	Coal	1990	0	0	1.14385
NER	Niger	Sub-Saharan Africa	Urban	Coal	1990	0	0	1.03534
NGA	Nigeria	Sub-Saharan Africa	Urban	Coal	1990	0	86.525	3531.94
NIU	Niue	Oceania excluding Australia and New Zealand	Urban	Coal	1990	0	0	0.00453636
PAK	Pakistan	Central Asia and Southern Asia	Urban	Coal	1990	0	0	43.4757
PNG	Papua New Guinea	Oceania excluding Australia and New Zealand	Urban	Coal	1990	0	0	6.63047
PRY	Paraguay	Latin America & the Caribbean	Urban	Coal	1990	0	0.0820737	5.25272
PER	Peru	Latin America & the Caribbean	Urban	Coal	1990	0	4.81239	170.848
PHL	Philippines	Eastern Asia and South-eastern Asia	Urban	Coal	1990	0	0.873193	113.239
MDA	Moldova, Republic of	Northern America and Europe	Urban	Coal	1990	0	0	1.3265
RUS	Russian Federation	Northern America and Europe	Urban	Coal	1990	0	0	280.531
RWA	Rwanda	Sub-Saharan Africa	Urban	Coal	1990	0	0.0117569	21.11
LCA	Saint Lucia	Latin America & the Caribbean	Urban	Coal	1990	0	0.00121671	0.998706
VCT	Saint Vincent and the Grenadines	Latin America & the Caribbean	Urban	Coal	1990	0	0.0841371	5.41907
WSM	Samoa	Oceania excluding Australia and New Zealand	Urban	Coal	1990	0	0	0.791693
STP	Sao Tome And Principe	Sub-Saharan Africa	Urban	Coal	1990	0	0.00347991	2.15154
SEN	Senegal	Sub-Saharan Africa	Urban	Coal	1990	0	0.455519	1404.59
SRB	Serbia	Northern America and Europe	Urban	Coal	1990	0	54.2455	1188.12
SLE	Sierra Leone	Sub-Saharan Africa	Urban	Coal	1990	0	0.12905	28.172
SLB	Solomon Islands	Oceania excluding Australia and New Zealand	Urban	Coal	1990	0	0	1.25543
SOM	Somalia	Sub-Saharan Africa	Urban	Coal	1990	0	0.263272	95.2639
ZAF	South Africa	Sub-Saharan Africa	Urban	Coal	1990	136.202	951.566	2696.56
SSD	South Sudan	Sub-Saharan Africa	Urban	Coal	1990	0	0.17614	42.5414
LKA	Sri Lanka	Central Asia and Southern Asia	Urban	Coal	1990	0	0	2.21715
SDN	Sudan	Western Asia and Northern Africa	Urban	Coal	1990	0	0	2.5939
SUR	Suriname	Latin America & the Caribbean	Urban	Coal	1990	0	0.00267733	1.91724
SWZ	Eswatini	Sub-Saharan Africa	Urban	Coal	1990	9.36993	34.5916	75.9253
SYR	Syrian Arab Republic	Western Asia and Northern Africa	Urban	Coal	1990	0	0	14.3131
TJK	Tajikistan	Central Asia and Southern Asia	Urban	Coal	1990	0	0	127.756
THA	Thailand	Eastern Asia and South-eastern Asia	Urban	Coal	1990	0	0.499462	99.5926
MKD	North Macedonia	Northern America and Europe	Urban	Coal	1990	0	1.14207	151.827
TLS	Timor-Leste	Eastern Asia and South-eastern Asia	Urban	Coal	1990	0	0	1.23497
TGO	Togo	Sub-Saharan Africa	Urban	Coal	1990	0	0.194875	58.5415
TON	Tonga	Oceania excluding Australia and New Zealand	Urban	Coal	1990	0	0	0.136991
TUN	Tunisia	Western Asia and Northern Africa	Urban	Coal	1990	0	0	56.3534
TUR	Turkey	Western Asia and Northern Africa	Urban	Coal	1990	0	88.1076	6597.34
TKM	Turkmenistan	Central Asia and Southern Asia	Urban	Coal	1990	0	0	7.97641
TUV	Tuvalu	Oceania excluding Australia and New Zealand	Urban	Coal	1990	0	0	0.0989596
UGA	Uganda	Sub-Saharan Africa	Urban	Coal	1990	0	0.135205	24.5311
UKR	Ukraine	Northern America and Europe	Urban	Coal	1990	0.343561	1318.41	14185.6
TZA	Tanzania, United Republic of	Sub-Saharan Africa	Urban	Coal	1990	0	0	6.63722
UZB	Uzbekistan	Central Asia and Southern Asia	Urban	Coal	1990	0	14.0932	1090.65
VUT	Vanuatu	Oceania excluding Australia and New Zealand	Urban	Coal	1990	0	0	1.33182
VEN	Venezuela (Bolivarian Republic of)	Latin America & the Caribbean	Urban	Coal	1990	0	0	4.8589
VNM	Viet Nam	Eastern Asia and South-eastern Asia	Urban	Coal	1990	0	1.79626	3657.17
YEM	Yemen	Western Asia and Northern Africa	Urban	Coal	1990	0	0	5.30101
ZMB	Zambia	Sub-Saharan Africa	Urban	Coal	1990	0	0.284696	46.8229
ZWE	Zimbabwe	Sub-Saharan Africa	Urban	Coal	1990	0	0	5.10756
AFG	Afghanistan	Central Asia and Southern Asia	Urban	Total Polluting	1990	135.144	1627.87	2556.28
ALB	Albania	Northern America and Europe	Urban	Total Polluting	1990	33.5797	576.854	1146.92
DZA	Algeria	Western Asia and Northern Africa	Urban	Total Polluting	1990	0	196.307	5439.49
AGO	Angola	Sub-Saharan Africa	Urban	Total Polluting	1990	85.6695	736.606	2036.84
ARG	Argentina	Latin America & the Caribbean	Urban	Total Polluting	1990	25.9073	1166.26	4890.8
ARM	Armenia	Western Asia and Northern Africa	Urban	Total Polluting	1990	10.8926	504.393	1846.82
AZE	Azerbaijan	Western Asia and Northern Africa	Urban	Total Polluting	1990	19.6203	599.645	2304.9
BGD	Bangladesh	Central Asia and Southern Asia	Urban	Total Polluting	1990	9544.47	14445.7	18322.2
BLR	Belarus	Northern America and Europe	Urban	Total Polluting	1990	0	130.138	2915.34
BLZ	Belize	Latin America & the Caribbean	Urban	Total Polluting	1990	4.33323	12.2391	23.632
BEN	Benin	Sub-Saharan Africa	Urban	Total Polluting	1990	1639.57	1715.42	1716.83
BTN	Bhutan	Central Asia and Southern Asia	Urban	Total Polluting	1990	1.95026	27.905	77.9189
BOL	Bolivia (Plurinational State of)	Latin America & the Caribbean	Urban	Total Polluting	1990	260.403	563.137	958.005
BIH	Bosnia and Herzegovina	Northern America and Europe	Urban	Total Polluting	1990	2.8008	249.422	1361.33
BWA	Botswana	Sub-Saharan Africa	Urban	Total Polluting	1990	79.8189	244.973	457.944
BRA	Brazil	Latin America & the Caribbean	Urban	Total Polluting	1990	1262.61	9901.03	25803.3
BFA	Burkina Faso	Sub-Saharan Africa	Urban	Total Polluting	1990	811.857	1115.61	1206.52
BDI	Burundi	Sub-Saharan Africa	Urban	Total Polluting	1990	258.302	339.004	339.609
CPV	Cabo Verde	Sub-Saharan Africa	Urban	Total Polluting	1990	0.464433	10.3197	50.2035
KHM	Cambodia	Eastern Asia and South-eastern Asia	Urban	Total Polluting	1990	1127.78	1337.91	1391.89
CMR	Cameroon	Sub-Saharan Africa	Urban	Total Polluting	1990	2904.38	4219.42	4599.59
CAF	Central African Republic	Sub-Saharan Africa	Urban	Total Polluting	1990	479.321	1047.31	1082.57
TCD	Chad	Sub-Saharan Africa	Urban	Total Polluting	1990	548.425	1165.55	1239.68
CHN	China	Eastern Asia and South-eastern Asia	Urban	Total Polluting	1990	11562.3	102197	249175
COL	Colombia	Latin America & the Caribbean	Urban	Total Polluting	1990	2794.59	4802.08	7286.78
COM	Comoros	Sub-Saharan Africa	Urban	Total Polluting	1990	110.733	114.647	114.709
COG	Congo	Sub-Saharan Africa	Urban	Total Polluting	1990	455.156	1156.67	1321.39
COK	Cook Islands	Oceania excluding Australia and New Zealand	Urban	Total Polluting	1990	0	0.480067	6.58613
CRI	Costa Rica	Latin America & the Caribbean	Urban	Total Polluting	1990	0.0464431	50.1508	401.676
CIV	Côte d'Ivoire	Sub-Saharan Africa	Urban	Total Polluting	1990	327.073	2311.08	4584.86
PRK	Democratic Peoples Republic of Korea	Eastern Asia and South-eastern Asia	Urban	Total Polluting	1990	7290.73	11726.5	11847.9
COD	Democratic Republic of the Congo	Sub-Saharan Africa	Urban	Total Polluting	1990	2618.29	9462.93	10603.2
DJI	Djibouti	Sub-Saharan Africa	Urban	Total Polluting	1990	359.512	429.228	448.108
DMA	Dominica	Latin America & the Caribbean	Urban	Total Polluting	1990	0	1.4746	33.8683
DOM	Dominican Republic	Latin America & the Caribbean	Urban	Total Polluting	1990	405.806	849.544	1352.13
ECU	Ecuador	Latin America & the Caribbean	Urban	Total Polluting	1990	1.51846	211.571	1554.67
EGY	Egypt	Western Asia and Northern Africa	Urban	Total Polluting	1990	112.789	2746.15	13284.3
SLV	El Salvador	Latin America & the Caribbean	Urban	Total Polluting	1990	100.484	1021.02	2203.79
GNQ	Equatorial Guinea	Sub-Saharan Africa	Urban	Total Polluting	1990	11.0362	111.477	148.262
ERI	Eritrea	Sub-Saharan Africa	Urban	Total Polluting	1990	487.651	564.709	587.387
ETH	Ethiopia	Sub-Saharan Africa	Urban	Total Polluting	1990	4860.18	5909.37	6069.05
FJI	Fiji	Oceania excluding Australia and New Zealand	Urban	Total Polluting	1990	43.3139	149.604	269.547
GAB	Gabon	Sub-Saharan Africa	Urban	Total Polluting	1990	22.7619	195.494	492.739
GMB	Gambia	Sub-Saharan Africa	Urban	Total Polluting	1990	291.259	341.589	351.25
GEO	Georgia	Western Asia and Northern Africa	Urban	Total Polluting	1990	11.7316	571.939	2367.23
GHA	Ghana	Sub-Saharan Africa	Urban	Total Polluting	1990	4570.05	4943.93	5188.16
GRD	Grenada	Latin America & the Caribbean	Urban	Total Polluting	1990	0.00577703	2.27122	17.078
GTM	Guatemala	Latin America & the Caribbean	Urban	Total Polluting	1990	194.366	1139.56	2711.3
GIN	Guinea	Sub-Saharan Africa	Urban	Total Polluting	1990	1416.62	1650.75	1692.89
GNB	Guinea-Bissau	Sub-Saharan Africa	Urban	Total Polluting	1990	207.319	290.545	311.985
GUY	Guyana	Latin America & the Caribbean	Urban	Total Polluting	1990	36.7592	125.63	201.597
HTI	Haiti	Latin America & the Caribbean	Urban	Total Polluting	1990	1410.53	1943.58	2022.61
HND	Honduras	Latin America & the Caribbean	Urban	Total Polluting	1990	451.407	1292.12	1887.41
IND	India	Central Asia and Southern Asia	Urban	Total Polluting	1990	129001	156199	179332
IDN	Indonesia	Eastern Asia and South-eastern Asia	Urban	Total Polluting	1990	42111	50025.2	54427
IRN	Iran (Islamic Republic of)	Central Asia and Southern Asia	Urban	Total Polluting	1990	0	1211.95	19490.9
IRQ	Iraq	Western Asia and Northern Africa	Urban	Total Polluting	1990	58.9332	2804.64	10831.6
JAM	Jamaica	Latin America & the Caribbean	Urban	Total Polluting	1990	0	75.8973	628.354
JOR	Jordan	Western Asia and Northern Africa	Urban	Total Polluting	1990	0	7.59393	222.789
KAZ	Kazakhstan	Central Asia and Southern Asia	Urban	Total Polluting	1990	2.60118	437.501	3218.86
KEN	Kenya	Sub-Saharan Africa	Urban	Total Polluting	1990	3427.69	3915.13	3919.44
KIR	Kiribati	Oceania excluding Australia and New Zealand	Urban	Total Polluting	1990	7.84301	24.0644	25.335
KGZ	Kyrgyzstan	Central Asia and Southern Asia	Urban	Total Polluting	1990	3.55006	366.578	1481.07
LAO	Lao People's Democratic Republic	Eastern Asia and South-eastern Asia	Urban	Total Polluting	1990	314.27	501.303	616.434
LSO	Lesotho	Sub-Saharan Africa	Urban	Total Polluting	1990	102.756	178.356	215.479
LBR	Liberia	Sub-Saharan Africa	Urban	Total Polluting	1990	759.257	1150.59	1162.32
MDG	Madagascar	Sub-Saharan Africa	Urban	Total Polluting	1990	2427.86	2643.62	2727.24
MWI	Malawi	Sub-Saharan Africa	Urban	Total Polluting	1990	667.336	955.06	1069.71
MYS	Malaysia	Eastern Asia and South-eastern Asia	Urban	Total Polluting	1990	0	96.152	2213.12
MDV	Maldives	Central Asia and Southern Asia	Urban	Total Polluting	1990	0	1.87428	54.7375
MLI	Mali	Sub-Saharan Africa	Urban	Total Polluting	1990	1689.75	1950.31	1974.29
MHL	Marshall Islands	Oceania excluding Australia and New Zealand	Urban	Total Polluting	1990	8.19871	28.327	30.769
MRT	Mauritania	Sub-Saharan Africa	Urban	Total Polluting	1990	332.456	583.211	732.62
MEX	Mexico	Latin America & the Caribbean	Urban	Total Polluting	1990	0	504.764	6163.95
FSM	Micronesia, Federated States of	Oceania excluding Australia and New Zealand	Urban	Total Polluting	1990	0.0340719	23.3414	24.87
MNG	Mongolia	Eastern Asia and South-eastern Asia	Urban	Total Polluting	1990	151.376	609.24	1096.5
MNE	Montenegro	Northern America and Europe	Urban	Total Polluting	1990	0.646994	48.173	232.044
MAR	Morocco	Western Asia and Northern Africa	Urban	Total Polluting	1990	0	140.017	2538.9
MOZ	Mozambique	Sub-Saharan Africa	Urban	Total Polluting	1990	1539.07	3082.45	3311.51
MMR	Myanmar	Eastern Asia and South-eastern Asia	Urban	Total Polluting	1990	5312.62	9893.89	10255.2
NAM	Namibia	Sub-Saharan Africa	Urban	Total Polluting	1990	3.47755	44.6576	170.917
NPL	Nepal	Central Asia and Southern Asia	Urban	Total Polluting	1990	1346.89	1628.76	1659.71
NIC	Nicaragua	Latin America & the Caribbean	Urban	Total Polluting	1990	1019.07	1460.42	1797.78
NER	Niger	Sub-Saharan Africa	Urban	Total Polluting	1990	1019.18	1183.8	1229.87
NGA	Nigeria	Sub-Saharan Africa	Urban	Total Polluting	1990	18015.6	26725.6	28227.8
NIU	Niue	Oceania excluding Australia and New Zealand	Urban	Total Polluting	1990	0	0.0882144	0.596157
PAK	Pakistan	Central Asia and Southern Asia	Urban	Total Polluting	1990	4603.36	15107.5	26840
PNG	Papua New Guinea	Oceania excluding Australia and New Zealand	Urban	Total Polluting	1990	147.228	497.561	643.426
PRY	Paraguay	Latin America & the Caribbean	Urban	Total Polluting	1990	305.968	577.163	881.732
PER	Peru	Latin America & the Caribbean	Urban	Total Polluting	1990	4619.7	9906.77	13561.7
PHL	Philippines	Eastern Asia and South-eastern Asia	Urban	Total Polluting	1990	13500.2	18355.8	22616.7
MDA	Moldova, Republic of	Northern America and Europe	Urban	Total Polluting	1990	0.958141	210.505	1193.27
RUS	Russian Federation	Northern America and Europe	Urban	Total Polluting	1990	0	35.7399	5324.59
RWA	Rwanda	Sub-Saharan Africa	Urban	Total Polluting	1990	283.333	379.081	391.898
LCA	Saint Lucia	Latin America & the Caribbean	Urban	Total Polluting	1990	0.0129782	21.5122	39.0323
VCT	Saint Vincent and the Grenadines	Latin America & the Caribbean	Urban	Total Polluting	1990	0	1.51358	13.2504
WSM	Samoa	Oceania excluding Australia and New Zealand	Urban	Total Polluting	1990	2.47834	21.0578	34.132
STP	Sao Tome And Principe	Sub-Saharan Africa	Urban	Total Polluting	1990	39.939	49.6277	49.713
SEN	Senegal	Sub-Saharan Africa	Urban	Total Polluting	1990	1264.13	1935.87	2449.43
SRB	Serbia	Northern America and Europe	Urban	Total Polluting	1990	13.8096	829.797	3866.01
SLE	Sierra Leone	Sub-Saharan Africa	Urban	Total Polluting	1990	526.253	1399.36	1433.89
SLB	Solomon Islands	Oceania excluding Australia and New Zealand	Urban	Total Polluting	1990	2.40981	25.5444	41.848
SOM	Somalia	Sub-Saharan Africa	Urban	Total Polluting	1990	2048.19	2192.53	2193.93
ZAF	South Africa	Sub-Saharan Africa	Urban	Total Polluting	1990	2399.6	5800.19	10230.7
SSD	South Sudan	Sub-Saharan Africa	Urban	Total Polluting	1990	224.64	756.795	765.828
LKA	Sri Lanka	Central Asia and Southern Asia	Urban	Total Polluting	1990	163.897	1163.78	2783.21
SDN	Sudan	Western Asia and Northern Africa	Urban	Total Polluting	1990	2989.38	5254.48	5746.87
SUR	Suriname	Latin America & the Caribbean	Urban	Total Polluting	1990	0.770669	42.3513	211.573
SWZ	Eswatini	Sub-Saharan Africa	Urban	Total Polluting	1990	54.1814	96.8154	135.285
SYR	Syrian Arab Republic	Western Asia and Northern Africa	Urban	Total Polluting	1990	0	83.0986	1795.21
TJK	Tajikistan	Central Asia and Southern Asia	Urban	Total Polluting	1990	34.5517	483.993	1323.54
THA	Thailand	Eastern Asia and South-eastern Asia	Urban	Total Polluting	1990	833.023	2908.95	5907.67
MKD	North Macedonia	Northern America and Europe	Urban	Total Polluting	1990	21.9828	507.747	1105.28
TLS	Timor-Leste	Eastern Asia and South-eastern Asia	Urban	Total Polluting	1990	79.009	152.222	156.717
TGO	Togo	Sub-Saharan Africa	Urban	Total Polluting	1990	1002.35	1080.66	1082.64
TON	Tonga	Oceania excluding Australia and New Zealand	Urban	Total Polluting	1990	0.0531134	3.82834	17.7761
TUN	Tunisia	Western Asia and Northern Africa	Urban	Total Polluting	1990	0.42935	327.451	2958.61
TUR	Turkey	Western Asia and Northern Africa	Urban	Total Polluting	1990	0.638461	1135.34	18895.1
TKM	Turkmenistan	Central Asia and Southern Asia	Urban	Total Polluting	1990	0	1.27031	103.938
TUV	Tuvalu	Oceania excluding Australia and New Zealand	Urban	Total Polluting	1990	0.0233288	3.10189	3.661
UGA	Uganda	Sub-Saharan Africa	Urban	Total Polluting	1990	1500.69	1813.02	1925.9
UKR	Ukraine	Northern America and Europe	Urban	Total Polluting	1990	26.7806	2595.09	18241.5
TZA	Tanzania, United Republic of	Sub-Saharan Africa	Urban	Total Polluting	1990	4667.54	4804.91	4807.84
UZB	Uzbekistan	Central Asia and Southern Asia	Urban	Total Polluting	1990	0	191.506	3289.36
VUT	Vanuatu	Oceania excluding Australia and New Zealand	Urban	Total Polluting	1990	0.74776	11.2758	26.2185
VEN	Venezuela (Bolivarian Republic of)	Latin America & the Caribbean	Urban	Total Polluting	1990	0	210.845	3524.93
VNM	Viet Nam	Eastern Asia and South-eastern Asia	Urban	Total Polluting	1990	13031.2	13554.3	13768.9
YEM	Yemen	Western Asia and Northern Africa	Urban	Total Polluting	1990	2.69909	292.546	1883.6
ZMB	Zambia	Sub-Saharan Africa	Urban	Total Polluting	1990	1882.68	2265.65	2599.45
ZWE	Zimbabwe	Sub-Saharan Africa	Urban	Total Polluting	1990	11.2114	213.438	1584.63
AFG	Afghanistan	Central Asia and Southern Asia	Urban	Total Clean	1990	37.6712	966.077	2458.8
ALB	Albania	Northern America and Europe	Urban	Total Clean	1990	48.4634	618.525	1161.8
DZA	Algeria	Western Asia and Northern Africa	Urban	Total Clean	1990	8057.01	13300.2	13496.5
AGO	Angola	Sub-Saharan Africa	Urban	Total Clean	1990	2484.15	3784.39	4435.33
ARG	Argentina	Latin America & the Caribbean	Urban	Total Clean	1990	23578.8	27303.3	28443.7
ARM	Armenia	Western Asia and Northern Africa	Urban	Total Clean	1990	538.636	1881.06	2374.57
AZE	Azerbaijan	Western Asia and Northern Africa	Urban	Total Clean	1990	1588.01	3293.27	3873.29
BGD	Bangladesh	Central Asia and Southern Asia	Urban	Total Clean	1990	2715.27	6591.77	11493
BLR	Belarus	Northern America and Europe	Urban	Total Clean	1990	3825.82	6611.02	6741.16
BLZ	Belize	Latin America & the Caribbean	Urban	Total Clean	1990	65.389	76.7819	84.6878
BEN	Benin	Sub-Saharan Africa	Urban	Total Clean	1990	0	1.4078	77.2552
BTN	Bhutan	Central Asia and Southern Asia	Urban	Total Clean	1990	10.1331	60.147	86.1017
BOL	Bolivia (Plurinational State of)	Latin America & the Caribbean	Urban	Total Clean	1990	2852.51	3247.38	3550.11
BIH	Bosnia and Herzegovina	Northern America and Europe	Urban	Total Clean	1990	390.541	1502.44	1749.07
BWA	Botswana	Sub-Saharan Africa	Urban	Total Clean	1990	119.857	332.828	497.982
BRA	Brazil	Latin America & the Caribbean	Urban	Total Clean	1990	84600.8	100503	109141
BFA	Burkina Faso	Sub-Saharan Africa	Urban	Total Clean	1990	10.6856	101.6	405.351
BDI	Burundi	Sub-Saharan Africa	Urban	Total Clean	1990	0	0.604504	81.3068
CPV	Cabo Verde	Sub-Saharan Africa	Urban	Total Clean	1990	100.636	140.519	150.375
KHM	Cambodia	Eastern Asia and South-eastern Asia	Urban	Total Clean	1990	3.12484	57.112	267.236
CMR	Cameroon	Sub-Saharan Africa	Urban	Total Clean	1990	46.3514	426.521	1741.56
CAF	Central African Republic	Sub-Saharan Africa	Urban	Total Clean	1990	0	35.2647	603.249
TCD	Chad	Sub-Saharan Africa	Urban	Total Clean	1990	0.0247941	74.1531	691.282
CHN	China	Eastern Asia and South-eastern Asia	Urban	Total Clean	1990	60847	207825	298460
COL	Colombia	Latin America & the Caribbean	Urban	Total Clean	1990	16525.4	19010.1	21017.6
COM	Comoros	Sub-Saharan Africa	Urban	Total Clean	1990	0	0.0619429	3.97593
COG	Congo	Sub-Saharan Africa	Urban	Total Clean	1990	4.37369	169.088	870.605
COK	Cook Islands	Oceania excluding Australia and New Zealand	Urban	Total Clean	1990	4.00787	10.1139	10.594
CRI	Costa Rica	Latin America & the Caribbean	Urban	Total Clean	1990	1146.43	1497.95	1548.06
CIV	Côte d'Ivoire	Sub-Saharan Africa	Urban	Total Clean	1990	241.946	2515.73	4499.73
PRK	Democratic Peoples Republic of Korea	Eastern Asia and South-eastern Asia	Urban	Total Clean	1990	0	121.322	4557.13
COD	Democratic Republic of the Congo	Sub-Saharan Africa	Urban	Total Clean	1990	0.212068	1140.45	7985.09
DJI	Djibouti	Sub-Saharan Africa	Urban	Total Clean	1990	0.340597	19.2205	88.9366
DMA	Dominica	Latin America & the Caribbean	Urban	Total Clean	1990	10.8707	43.2644	44.739
DOM	Dominican Republic	Latin America & the Caribbean	Urban	Total Clean	1990	2615.11	3117.69	3561.43
ECU	Ecuador	Latin America & the Caribbean	Urban	Total Clean	1990	4074.47	5417.57	5627.62
EGY	Egypt	Western Asia and Northern Africa	Urban	Total Clean	1990	11677.3	22215.4	24848.8
SLV	El Salvador	Latin America & the Caribbean	Urban	Total Clean	1990	385.527	1568.3	2488.84
GNQ	Equatorial Guinea	Sub-Saharan Africa	Urban	Total Clean	1990	0.0443064	36.8288	137.27
ERI	Eritrea	Sub-Saharan Africa	Urban	Total Clean	1990	1.18892	23.8668	100.925
ETH	Ethiopia	Sub-Saharan Africa	Urban	Total Clean	1990	0	159.677	1208.87
FJI	Fiji	Oceania excluding Australia and New Zealand	Urban	Total Clean	1990	33.644	153.587	259.877
GAB	Gabon	Sub-Saharan Africa	Urban	Total Clean	1990	165.646	462.891	635.623
GMB	Gambia	Sub-Saharan Africa	Urban	Total Clean	1990	0	9.66113	59.9912
GEO	Georgia	Western Asia and Northern Africa	Urban	Total Clean	1990	610.533	2405.83	2966.03
GHA	Ghana	Sub-Saharan Africa	Urban	Total Clean	1990	142.543	386.769	760.648
GRD	Grenada	Latin America & the Caribbean	Urban	Total Clean	1990	15.106	29.9128	32.1782
GTM	Guatemala	Latin America & the Caribbean	Urban	Total Clean	1990	1178.72	2750.46	3695.66
GIN	Guinea	Sub-Saharan Africa	Urban	Total Clean	1990	0.186238	42.3268	276.453
GNB	Guinea-Bissau	Sub-Saharan Africa	Urban	Total Clean	1990	0.0967454	21.5368	104.763
GUY	Guyana	Latin America & the Caribbean	Urban	Total Clean	1990	18.2958	94.2626	183.134
HTI	Haiti	Latin America & the Caribbean	Urban	Total Clean	1990	1.53734	80.561	613.62
HND	Honduras	Latin America & the Caribbean	Urban	Total Clean	1990	117.523	712.813	1553.52
IND	India	Central Asia and Southern Asia	Urban	Total Clean	1990	42964.5	66097.7	93295.3
IDN	Indonesia	Eastern Asia and South-eastern Asia	Urban	Total Clean	1990	1064.31	5466.17	13380.3
IRN	Iran (Islamic Republic of)	Central Asia and Southern Asia	Urban	Total Clean	1990	12181.6	30460.5	31672.5
IRQ	Iraq	Western Asia and Northern Africa	Urban	Total Clean	1990	1345.3	9372.26	12118
JAM	Jamaica	Latin America & the Caribbean	Urban	Total Clean	1990	570.276	1122.73	1198.63
JOR	Jordan	Western Asia and Northern Africa	Urban	Total Clean	1990	2386.81	2602	2609.6
KAZ	Kazakhstan	Central Asia and Southern Asia	Urban	Total Clean	1990	6087.69	8869.05	9303.95
KEN	Kenya	Sub-Saharan Africa	Urban	Total Clean	1990	0	4.31138	491.746
KIR	Kiribati	Oceania excluding Australia and New Zealand	Urban	Total Clean	1990	0	1.27055	17.492
KGZ	Kyrgyzstan	Central Asia and Southern Asia	Urban	Total Clean	1990	170.887	1285.38	1648.41
LAO	Lao People's Democratic Republic	Eastern Asia and South-eastern Asia	Urban	Total Clean	1990	40.9387	156.07	343.103
LSO	Lesotho	Sub-Saharan Africa	Urban	Total Clean	1990	8.53719	45.6601	121.26
LBR	Liberia	Sub-Saharan Africa	Urban	Total Clean	1990	0	11.7337	403.067
MDG	Madagascar	Sub-Saharan Africa	Urban	Total Clean	1990	6.04055	89.6653	305.422
MWI	Malawi	Sub-Saharan Africa	Urban	Total Clean	1990	21.2828	135.932	423.656
MYS	Malaysia	Eastern Asia and South-eastern Asia	Urban	Total Clean	1990	6768.86	8885.82	8981.97
MDV	Maldives	Central Asia and Southern Asia	Urban	Total Clean	1990	2.94148	55.8047	57.679
MLI	Mali	Sub-Saharan Africa	Urban	Total Clean	1990	0	23.9877	284.545
MHL	Marshall Islands	Oceania excluding Australia and New Zealand	Urban	Total Clean	1990	0	2.44198	22.5703
MRT	Mauritania	Sub-Saharan Africa	Urban	Total Clean	1990	65.6873	215.096	465.851
MEX	Mexico	Latin America & the Caribbean	Urban	Total Clean	1990	54797.8	60457	60961.8
FSM	Micronesia, Federated States of	Oceania excluding Australia and New Zealand	Urban	Total Clean	1990	0	1.52863	24.8359
MNG	Mongolia	Eastern Asia and South-eastern Asia	Urban	Total Clean	1990	149.175	636.434	1094.3
MNE	Montenegro	Northern America and Europe	Urban	Total Clean	1990	63.3868	247.258	294.784
MAR	Morocco	Western Asia and Northern Africa	Urban	Total Clean	1990	9500.38	11899.3	12039.3
MOZ	Mozambique	Sub-Saharan Africa	Urban	Total Clean	1990	0.397429	229.466	1772.84
MMR	Myanmar	Eastern Asia and South-eastern Asia	Urban	Total Clean	1990	0	361.343	4942.61
NAM	Namibia	Sub-Saharan Africa	Urban	Total Clean	1990	220.336	346.595	387.775
NPL	Nepal	Central Asia and Southern Asia	Urban	Total Clean	1990	0.431221	31.3766	313.251
NIC	Nicaragua	Latin America & the Caribbean	Urban	Total Clean	1990	401.927	739.29	1180.64
NER	Niger	Sub-Saharan Africa	Urban	Total Clean	1990	1.57441	47.6509	212.267
NGA	Nigeria	Sub-Saharan Africa	Urban	Total Clean	1990	48.3239	1550.52	10260.5
NIU	Niue	Oceania excluding Australia and New Zealand	Urban	Total Clean	1990	0.123843	0.631786	0.72
PAK	Pakistan	Central Asia and Southern Asia	Urban	Total Clean	1990	6083.67	17816.2	28320.3
PNG	Papua New Guinea	Oceania excluding Australia and New Zealand	Urban	Total Clean	1990	3.29098	149.156	499.489
PRY	Paraguay	Latin America & the Caribbean	Urban	Total Clean	1990	1170.11	1474.68	1745.87
PER	Peru	Latin America & the Caribbean	Urban	Total Clean	1990	1477.01	5131.97	10419
PHL	Philippines	Eastern Asia and South-eastern Asia	Urban	Total Clean	1990	6489.77	10750.6	15606.2
MDA	Moldova, Republic of	Northern America and Europe	Urban	Total Clean	1990	847.503	1830.26	2039.81
RUS	Russian Federation	Northern America and Europe	Urban	Total Clean	1990	102978	108267	108303
RWA	Rwanda	Sub-Saharan Africa	Urban	Total Clean	1990	0	12.817	108.565
LCA	Saint Lucia	Latin America & the Caribbean	Urban	Total Clean	1990	1.52474	19.0448	40.544
VCT	Saint Vincent and the Grenadines	Latin America & the Caribbean	Urban	Total Clean	1990	31.2666	43.0034	44.517
WSM	Samoa	Oceania excluding Australia and New Zealand	Urban	Total Clean	1990	0.395984	13.4702	32.0497
STP	Sao Tome And Principe	Sub-Saharan Africa	Urban	Total Clean	1990	0	0.0852578	9.77401
SEN	Senegal	Sub-Saharan Africa	Urban	Total Clean	1990	489.4	1002.96	1674.7
SRB	Serbia	Northern America and Europe	Urban	Total Clean	1990	930.231	3966.44	4782.43
SLE	Sierra Leone	Sub-Saharan Africa	Urban	Total Clean	1990	0	34.5281	907.638
SLB	Solomon Islands	Oceania excluding Australia and New Zealand	Urban	Total Clean	1990	0.801044	17.1046	40.2392
SOM	Somalia	Sub-Saharan Africa	Urban	Total Clean	1990	0	1.40412	145.744
ZAF	South Africa	Sub-Saharan Africa	Urban	Total Clean	1990	9314.65	13745.2	17145.8
SSD	South Sudan	Sub-Saharan Africa	Urban	Total Clean	1990	0	9.03294	541.188
LKA	Sri Lanka	Central Asia and Southern Asia	Urban	Total Clean	1990	428.888	2048.32	3048.2
SDN	Sudan	Western Asia and Northern Africa	Urban	Total Clean	1990	17.3445	509.729	2774.83
SUR	Suriname	Latin America & the Caribbean	Urban	Total Clean	1990	56.1604	225.382	266.962
SWZ	Eswatini	Sub-Saharan Africa	Urban	Total Clean	1990	38.7264	77.1956	119.83
SYR	Syrian Arab Republic	Western Asia and Northern Africa	Urban	Total Clean	1990	4294.83	6006.94	6090.04
TJK	Tajikistan	Central Asia and Southern Asia	Urban	Total Clean	1990	349.178	1188.73	1638.17
THA	Thailand	Eastern Asia and South-eastern Asia	Urban	Total Clean	1990	10741	13739.8	15815.7
MKD	North Macedonia	Northern America and Europe	Urban	Total Clean	1990	48.3273	645.856	1131.62
TLS	Timor-Leste	Eastern Asia and South-eastern Asia	Urban	Total Clean	1990	0	4.49464	77.708
TGO	Togo	Sub-Saharan Africa	Urban	Total Clean	1990	0	1.97582	80.2866
TON	Tonga	Oceania excluding Australia and New Zealand	Urban	Total Clean	1990	3.82795	17.7757	21.5509
TUN	Tunisia	Western Asia and Northern Africa	Urban	Total Clean	1990	1811.95	4443.11	4770.13
TUR	Turkey	Western Asia and Northern Africa	Urban	Total Clean	1990	13027.9	30787.7	31922.4
TKM	Turkmenistan	Central Asia and Southern Asia	Urban	Total Clean	1990	1556.6	1659.27	1660.54
TUV	Tuvalu	Oceania excluding Australia and New Zealand	Urban	Total Clean	1990	0	0.559108	3.63767
UGA	Uganda	Sub-Saharan Africa	Urban	Total Clean	1990	5.59943	118.488	430.813
UKR	Ukraine	Northern America and Europe	Urban	Total Clean	1990	16114.5	31761	34329.3
TZA	Tanzania, United Republic of	Sub-Saharan Africa	Urban	Total Clean	1990	0	2.93278	140.302
UZB	Uzbekistan	Central Asia and Southern Asia	Urban	Total Clean	1990	5175	8272.86	8464.36
VUT	Vanuatu	Oceania excluding Australia and New Zealand	Urban	Total Clean	1990	1.22451	16.1672	26.6952
VEN	Venezuela (Bolivarian Republic of)	Latin America & the Caribbean	Urban	Total Clean	1990	13215.5	16529.6	16740.4
VNM	Viet Nam	Eastern Asia and South-eastern Asia	Urban	Total Clean	1990	48.4992	263.084	786.263
YEM	Yemen	Western Asia and Northern Africa	Urban	Total Clean	1990	640.09	2231.14	2520.99
ZMB	Zambia	Sub-Saharan Africa	Urban	Total Clean	1990	563.836	897.629	1280.61
ZWE	Zimbabwe	Sub-Saharan Africa	Urban	Total Clean	1990	1367.29	2738.48	2940.71
AFG	Afghanistan	Central Asia and Southern Asia	Rural	Kerosene	1990	0	0.57931	348.863
ALB	Albania	Northern America and Europe	Rural	Kerosene	1990	0	0	29.542
DZA	Algeria	Western Asia and Northern Africa	Rural	Kerosene	1990	0	0.620793	1196
AGO	Angola	Sub-Saharan Africa	Rural	Kerosene	1990	0	0.535531	519.624
ARG	Argentina	Latin America & the Caribbean	Rural	Kerosene	1990	0	18.1909	258.507
ARM	Armenia	Western Asia and Northern Africa	Rural	Kerosene	1990	0	2.47256	110.375
AZE	Azerbaijan	Western Asia and Northern Africa	Rural	Kerosene	1990	0	46.0606	602.817
BGD	Bangladesh	Central Asia and Southern Asia	Rural	Kerosene	1990	0	299.306	7594.68
BLR	Belarus	Northern America and Europe	Rural	Kerosene	1990	0	0.139027	306.495
BLZ	Belize	Latin America & the Caribbean	Rural	Kerosene	1990	0.314068	2.69876	8.13381
BEN	Benin	Sub-Saharan Africa	Rural	Kerosene	1990	0	38.031	363.389
BTN	Bhutan	Central Asia and Southern Asia	Rural	Kerosene	1990	0	5.61984	80.9519
BOL	Bolivia (Plurinational State of)	Latin America & the Caribbean	Rural	Kerosene	1990	3.71351	25.8582	92.9572
BIH	Bosnia and Herzegovina	Northern America and Europe	Rural	Kerosene	1990	0	0	56.2377
BWA	Botswana	Sub-Saharan Africa	Rural	Kerosene	1990	0.224031	25.4435	161.735
BRA	Brazil	Latin America & the Caribbean	Rural	Kerosene	1990	0	0	390.718
BFA	Burkina Faso	Sub-Saharan Africa	Rural	Kerosene	1990	0	22.0221	394.275
BDI	Burundi	Sub-Saharan Africa	Rural	Kerosene	1990	0	0	11.5233
CPV	Cabo Verde	Sub-Saharan Africa	Rural	Kerosene	1990	0	0	2.7304
KHM	Cambodia	Eastern Asia and South-eastern Asia	Rural	Kerosene	1990	0	32.2079	474.346
CMR	Cameroon	Sub-Saharan Africa	Rural	Kerosene	1990	1.20178	324.126	2321.3
CAF	Central African Republic	Sub-Saharan Africa	Rural	Kerosene	1990	0	0.464303	203.805
TCD	Chad	Sub-Saharan Africa	Rural	Kerosene	1990	0	3.60862	669.433
CHN	China	Eastern Asia and South-eastern Asia	Rural	Kerosene	1990	0	0	11446.7
COL	Colombia	Latin America & the Caribbean	Rural	Kerosene	1990	195.583	547.339	1180.04
COM	Comoros	Sub-Saharan Africa	Rural	Kerosene	1990	0	7.23212	81.1983
COG	Congo	Sub-Saharan Africa	Rural	Kerosene	1990	0	13.8222	302.685
COK	Cook Islands	Oceania excluding Australia and New Zealand	Rural	Kerosene	1990	0	0.172549	4.764
CRI	Costa Rica	Latin America & the Caribbean	Rural	Kerosene	1990	0	0.0154789	36.9451
CIV	Côte d'Ivoire	Sub-Saharan Africa	Rural	Kerosene	1990	0	1.5626	274.658
PRK	Democratic Peoples Republic of Korea	Eastern Asia and South-eastern Asia	Rural	Kerosene	1990	0	37.9189	2342.7
COD	Democratic Republic of the Congo	Sub-Saharan Africa	Rural	Kerosene	1990	0	0	444.279
DJI	Djibouti	Sub-Saharan Africa	Rural	Kerosene	1990	33.8657	87.6862	127.315
DMA	Dominica	Latin America & the Caribbean	Rural	Kerosene	1990	0	0.014141	4.87799
DOM	Dominican Republic	Latin America & the Caribbean	Rural	Kerosene	1990	0	1.20615	32.3289
ECU	Ecuador	Latin America & the Caribbean	Rural	Kerosene	1990	0	37.3082	619.925
EGY	Egypt	Western Asia and Northern Africa	Rural	Kerosene	1990	6199.08	19918.4	29478.6
SLV	El Salvador	Latin America & the Caribbean	Rural	Kerosene	1990	0	25.2039	374.571
GNQ	Equatorial Guinea	Sub-Saharan Africa	Rural	Kerosene	1990	0	35.0334	242.14
ERI	Eritrea	Sub-Saharan Africa	Rural	Kerosene	1990	0.151484	72.6366	481.849
ETH	Ethiopia	Sub-Saharan Africa	Rural	Kerosene	1990	1.26052	1431.75	11915.4
FJI	Fiji	Oceania excluding Australia and New Zealand	Rural	Kerosene	1990	0.12327	29.3296	188.984
GAB	Gabon	Sub-Saharan Africa	Rural	Kerosene	1990	0	0.117531	15.8963
GMB	Gambia	Sub-Saharan Africa	Rural	Kerosene	1990	0	0.00565558	3.34372
GEO	Georgia	Western Asia and Northern Africa	Rural	Kerosene	1990	0	2.43261	193.85
GHA	Ghana	Sub-Saharan Africa	Rural	Kerosene	1990	0.743805	59.7368	332.704
GRD	Grenada	Latin America & the Caribbean	Rural	Kerosene	1990	0	0.23973	12.7549
GTM	Guatemala	Latin America & the Caribbean	Rural	Kerosene	1990	0	0	137.042
GIN	Guinea	Sub-Saharan Africa	Rural	Kerosene	1990	0	73.9164	568.528
GNB	Guinea-Bissau	Sub-Saharan Africa	Rural	Kerosene	1990	0	0	1.23953
GUY	Guyana	Latin America & the Caribbean	Rural	Kerosene	1990	150.45	351.492	475.383
HTI	Haiti	Latin America & the Caribbean	Rural	Kerosene	1990	0	20.3023	424.073
HND	Honduras	Latin America & the Caribbean	Rural	Kerosene	1990	0	91.9196	991.77
IND	India	Central Asia and Southern Asia	Rural	Kerosene	1990	2396.83	10867.5	28913.1
IDN	Indonesia	Eastern Asia and South-eastern Asia	Rural	Kerosene	1990	4923.15	14150	29849
IRN	Iran (Islamic Republic of)	Central Asia and Southern Asia	Rural	Kerosene	1990	0	2465.81	19347.1
IRQ	Iraq	Western Asia and Northern Africa	Rural	Kerosene	1990	20.1021	1113.11	4256.13
JAM	Jamaica	Latin America & the Caribbean	Rural	Kerosene	1990	0	0.147073	193.708
JOR	Jordan	Western Asia and Northern Africa	Rural	Kerosene	1990	0	2.13971	131.378
KAZ	Kazakhstan	Central Asia and Southern Asia	Rural	Kerosene	1990	0	3.54452	407.187
KEN	Kenya	Sub-Saharan Africa	Rural	Kerosene	1990	0.194831	118.847	937.681
KIR	Kiribati	Oceania excluding Australia and New Zealand	Rural	Kerosene	1990	0	1.18093	31.754
KGZ	Kyrgyzstan	Central Asia and Southern Asia	Rural	Kerosene	1990	0	0.353721	114.023
LAO	Lao People's Democratic Republic	Eastern Asia and South-eastern Asia	Rural	Kerosene	1990	0	0	3.24369
LSO	Lesotho	Sub-Saharan Africa	Rural	Kerosene	1990	131.393	438.898	835.248
LBR	Liberia	Sub-Saharan Africa	Rural	Kerosene	1990	0	2.22976	250.184
MDG	Madagascar	Sub-Saharan Africa	Rural	Kerosene	1990	0	0	50.3663
MWI	Malawi	Sub-Saharan Africa	Rural	Kerosene	1990	0	2.33704	164.532
MYS	Malaysia	Eastern Asia and South-eastern Asia	Rural	Kerosene	1990	0	30.4746	1845.89
MDV	Maldives	Central Asia and Southern Asia	Rural	Kerosene	1990	0	1.91856	58.39
MLI	Mali	Sub-Saharan Africa	Rural	Kerosene	1990	0	17.9149	844.306
MHL	Marshall Islands	Oceania excluding Australia and New Zealand	Rural	Kerosene	1990	0	0.613804	10.4316
MRT	Mauritania	Sub-Saharan Africa	Rural	Kerosene	1990	0	0.036955	5.54479
MEX	Mexico	Latin America & the Caribbean	Rural	Kerosene	1990	0	108.563	1749.28
FSM	Micronesia, Federated States of	Oceania excluding Australia and New Zealand	Rural	Kerosene	1990	0.347979	15.348	61.767
MNG	Mongolia	Eastern Asia and South-eastern Asia	Rural	Kerosene	1990	0	0	4.57035
MNE	Montenegro	Northern America and Europe	Rural	Kerosene	1990	0	0.0255657	21.0601
MAR	Morocco	Western Asia and Northern Africa	Rural	Kerosene	1990	0	16.3066	1384.22
MOZ	Mozambique	Sub-Saharan Africa	Rural	Kerosene	1990	0	0	64.627
MMR	Myanmar	Eastern Asia and South-eastern Asia	Rural	Kerosene	1990	0	0	103.315
NAM	Namibia	Sub-Saharan Africa	Rural	Kerosene	1990	0	1.67332	22.5126
NPL	Nepal	Central Asia and Southern Asia	Rural	Kerosene	1990	0	1397.3	4575.89
NIC	Nicaragua	Latin America & the Caribbean	Rural	Kerosene	1990	0	15.4908	125.605
NER	Niger	Sub-Saharan Africa	Rural	Kerosene	1990	0	88.1245	721.33
NGA	Nigeria	Sub-Saharan Africa	Rural	Kerosene	1990	22.0912	3420.04	29827.8
NIU	Niue	Oceania excluding Australia and New Zealand	Rural	Kerosene	1990	0	0.0971031	0.934775
PAK	Pakistan	Central Asia and Southern Asia	Rural	Kerosene	1990	0	1825.89	15713.7
PNG	Papua New Guinea	Oceania excluding Australia and New Zealand	Rural	Kerosene	1990	0	150.833	1042.35
PRY	Paraguay	Latin America & the Caribbean	Rural	Kerosene	1990	0	0.021619	17.4471
PER	Peru	Latin America & the Caribbean	Rural	Kerosene	1990	13.844	521.957	2552.81
PHL	Philippines	Eastern Asia and South-eastern Asia	Rural	Kerosene	1990	445.906	2103.46	5614.03
MDA	Moldova, Republic of	Northern America and Europe	Rural	Kerosene	1990	0	0.673771	67.7511
RUS	Russian Federation	Northern America and Europe	Rural	Kerosene	1990	0	0	1309.81
RWA	Rwanda	Sub-Saharan Africa	Rural	Kerosene	1990	0	0.68439	48.0459
LCA	Saint Lucia	Latin America & the Caribbean	Rural	Kerosene	1990	0	0.0668752	8.36291
VCT	Saint Vincent and the Grenadines	Latin America & the Caribbean	Rural	Kerosene	1990	0	0.0541697	5.11617
WSM	Samoa	Oceania excluding Australia and New Zealand	Rural	Kerosene	1990	0.47469	18.4524	76.5374
STP	Sao Tome And Principe	Sub-Saharan Africa	Rural	Kerosene	1990	0	3.01068	45.964
SEN	Senegal	Sub-Saharan Africa	Rural	Kerosene	1990	0	0	14.9157
SRB	Serbia	Northern America and Europe	Rural	Kerosene	1990	0	0.708215	471.724
SLE	Sierra Leone	Sub-Saharan Africa	Rural	Kerosene	1990	0	178.861	1782.28
SLB	Solomon Islands	Oceania excluding Australia and New Zealand	Rural	Kerosene	1990	0	0.0161515	18.7105
SOM	Somalia	Sub-Saharan Africa	Rural	Kerosene	1990	0	60.4636	1428.09
ZAF	South Africa	Sub-Saharan Africa	Rural	Kerosene	1990	1345.12	3912.26	7339.96
SSD	South Sudan	Sub-Saharan Africa	Rural	Kerosene	1990	0	0.100053	327.086
LKA	Sri Lanka	Central Asia and Southern Asia	Rural	Kerosene	1990	4.22823	539.222	4756.51
SDN	Sudan	Western Asia and Northern Africa	Rural	Kerosene	1990	0	0.143834	74.3872
SUR	Suriname	Latin America & the Caribbean	Rural	Kerosene	1990	0	0.798608	34.2239
SWZ	Eswatini	Sub-Saharan Africa	Rural	Kerosene	1990	0.467062	10.7469	59.4946
SYR	Syrian Arab Republic	Western Asia and Northern Africa	Rural	Kerosene	1990	0	17.2251	1427.12
TJK	Tajikistan	Central Asia and Southern Asia	Rural	Kerosene	1990	0	2.74437	98.2231
THA	Thailand	Eastern Asia and South-eastern Asia	Rural	Kerosene	1990	0	13.1783	638.177
MKD	North Macedonia	Northern America and Europe	Rural	Kerosene	1990	0	0.00842625	129.346
TLS	Timor-Leste	Eastern Asia and South-eastern Asia	Rural	Kerosene	1990	0	6.77653	254.247
TGO	Togo	Sub-Saharan Africa	Rural	Kerosene	1990	0	30.9372	777.89
TON	Tonga	Oceania excluding Australia and New Zealand	Rural	Kerosene	1990	0	1.82071	34.8125
TUN	Tunisia	Western Asia and Northern Africa	Rural	Kerosene	1990	0	126.406	2206.93
TUR	Turkey	Western Asia and Northern Africa	Rural	Kerosene	1990	0	59.0664	6529.18
TKM	Turkmenistan	Central Asia and Southern Asia	Rural	Kerosene	1990	0	0	93.5525
TUV	Tuvalu	Oceania excluding Australia and New Zealand	Rural	Kerosene	1990	0	2.00346	5.32668
UGA	Uganda	Sub-Saharan Africa	Rural	Kerosene	1990	0	34.1163	714.275
UKR	Ukraine	Northern America and Europe	Rural	Kerosene	1990	0	0	564.441
TZA	Tanzania, United Republic of	Sub-Saharan Africa	Rural	Kerosene	1990	0	0	165.23
UZB	Uzbekistan	Central Asia and Southern Asia	Rural	Kerosene	1990	0	12.0581	1116.11
VUT	Vanuatu	Oceania excluding Australia and New Zealand	Rural	Kerosene	1990	0	2.947	58.6444
VEN	Venezuela (Bolivarian Republic of)	Latin America & the Caribbean	Rural	Kerosene	1990	0	19.5878	729.984
VNM	Viet Nam	Eastern Asia and South-eastern Asia	Rural	Kerosene	1990	0	133.261	2207.79
YEM	Yemen	Western Asia and Northern Africa	Rural	Kerosene	1990	0	231.041	3691.94
ZMB	Zambia	Sub-Saharan Africa	Rural	Kerosene	1990	0	0	34.0028
ZWE	Zimbabwe	Sub-Saharan Africa	Rural	Kerosene	1990	0	5.49571	508.979
AFG	Afghanistan	Central Asia and Southern Asia	Rural	Gas	1990	0	59.2344	2334.55
ALB	Albania	Northern America and Europe	Rural	Gas	1990	0	132.434	1312.12
DZA	Algeria	Western Asia and Northern Africa	Rural	Gas	1990	3443.39	11252.6	12406.3
AGO	Angola	Sub-Saharan Africa	Rural	Gas	1990	0.304105	579.521	4854.27
ARG	Argentina	Latin America & the Caribbean	Rural	Gas	1990	994.271	2109.55	3431.65
ARM	Armenia	Western Asia and Northern Africa	Rural	Gas	1990	0.334285	27.6938	267.854
AZE	Azerbaijan	Western Asia and Northern Africa	Rural	Gas	1990	0	6.83371	157.806
BGD	Bangladesh	Central Asia and Southern Asia	Rural	Gas	1990	0	409.577	7766.13
BLR	Belarus	Northern America and Europe	Rural	Gas	1990	402.102	2486.38	3429.64
BLZ	Belize	Latin America & the Caribbean	Rural	Gas	1990	25.2818	40.4081	57.9264
BEN	Benin	Sub-Saharan Africa	Rural	Gas	1990	0	0.09785	25.5429
BTN	Bhutan	Central Asia and Southern Asia	Rural	Gas	1990	0	2.72906	53.5553
BOL	Bolivia (Plurinational State of)	Latin America & the Caribbean	Rural	Gas	1990	134.071	349.086	697.846
BIH	Bosnia and Herzegovina	Northern America and Europe	Rural	Gas	1990	0	44.239	712.376
BWA	Botswana	Sub-Saharan Africa	Rural	Gas	1990	1.51941	58.1881	267.882
BRA	Brazil	Latin America & the Caribbean	Rural	Gas	1990	6291.63	13484.2	22518.9
BFA	Burkina Faso	Sub-Saharan Africa	Rural	Gas	1990	0	33.7925	415.479
BDI	Burundi	Sub-Saharan Africa	Rural	Gas	1990	0	0	41.7396
CPV	Cabo Verde	Sub-Saharan Africa	Rural	Gas	1990	16.0999	75.3755	152.896
KHM	Cambodia	Eastern Asia and South-eastern Asia	Rural	Gas	1990	0	22.735	455.802
CMR	Cameroon	Sub-Saharan Africa	Rural	Gas	1990	0.141386	65.4969	825.248
CAF	Central African Republic	Sub-Saharan Africa	Rural	Gas	1990	0	0	23.8679
TCD	Chad	Sub-Saharan Africa	Rural	Gas	1990	0	15.944	1446.51
CHN	China	Eastern Asia and South-eastern Asia	Rural	Gas	1990	11187.1	230194	668630
COL	Colombia	Latin America & the Caribbean	Rural	Gas	1990	534.147	1197.39	2147.11
COM	Comoros	Sub-Saharan Africa	Rural	Gas	1990	0	0.0475016	3.95154
COG	Congo	Sub-Saharan Africa	Rural	Gas	1990	0	4.16896	157.944
COK	Cook Islands	Oceania excluding Australia and New Zealand	Rural	Gas	1990	0	1.06809	7.71373
CRI	Costa Rica	Latin America & the Caribbean	Rural	Gas	1990	136.14	578.641	1159.97
CIV	Côte d'Ivoire	Sub-Saharan Africa	Rural	Gas	1990	0	121.659	2285.57
PRK	Democratic Peoples Republic of Korea	Eastern Asia and South-eastern Asia	Rural	Gas	1990	0	36.061	2275.91
COD	Democratic Republic of the Congo	Sub-Saharan Africa	Rural	Gas	1990	0	6.36297	3675.33
DJI	Djibouti	Sub-Saharan Africa	Rural	Gas	1990	0	0.295964	11.1574
DMA	Dominica	Latin America & the Caribbean	Rural	Gas	1990	0	4.07627	25.9061
DOM	Dominican Republic	Latin America & the Caribbean	Rural	Gas	1990	298.662	671.795	1220.22
ECU	Ecuador	Latin America & the Caribbean	Rural	Gas	1990	615.659	1994.73	3593.82
EGY	Egypt	Western Asia and Northern Africa	Rural	Gas	1990	1665.31	9348.38	23779.8
SLV	El Salvador	Latin America & the Caribbean	Rural	Gas	1990	3.13815	316.827	1361.66
GNQ	Equatorial Guinea	Sub-Saharan Africa	Rural	Gas	1990	0	7.07631	161.475
ERI	Eritrea	Sub-Saharan Africa	Rural	Gas	1990	0	7.11975	115.257
ETH	Ethiopia	Sub-Saharan Africa	Rural	Gas	1990	0	0	1633.95
FJI	Fiji	Oceania excluding Australia and New Zealand	Rural	Gas	1990	0.084981	24.352	178.42
GAB	Gabon	Sub-Saharan Africa	Rural	Gas	1990	0.408199	29.6325	152.618
GMB	Gambia	Sub-Saharan Africa	Rural	Gas	1990	0	0.870959	62.8437
GEO	Georgia	Western Asia and Northern Africa	Rural	Gas	1990	0	44.5775	851.947
GHA	Ghana	Sub-Saharan Africa	Rural	Gas	1990	0.278927	27.0559	181.305
GRD	Grenada	Latin America & the Caribbean	Rural	Gas	1990	15.735	52.906	63.6524
GTM	Guatemala	Latin America & the Caribbean	Rural	Gas	1990	167.223	1340.22	3533.14
GIN	Guinea	Sub-Saharan Africa	Rural	Gas	1990	0	0.173921	42.3932
GNB	Guinea-Bissau	Sub-Saharan Africa	Rural	Gas	1990	0	0.0910257	35.8745
GUY	Guyana	Latin America & the Caribbean	Rural	Gas	1990	9.29508	73.341	252.377
HTI	Haiti	Latin America & the Caribbean	Rural	Gas	1990	0	17.5108	404.944
HND	Honduras	Latin America & the Caribbean	Rural	Gas	1990	0	82.1833	871.458
IND	India	Central Asia and Southern Asia	Rural	Gas	1990	2967.09	13015	34037.2
IDN	Indonesia	Eastern Asia and South-eastern Asia	Rural	Gas	1990	3.77836	317.383	1881.66
IRN	Iran (Islamic Republic of)	Central Asia and Southern Asia	Rural	Gas	1990	2759.84	18365.6	24342.1
IRQ	Iraq	Western Asia and Northern Africa	Rural	Gas	1990	59.5282	1471.42	4525.76
JAM	Jamaica	Latin America & the Caribbean	Rural	Gas	1990	22.7228	243.927	709.679
JOR	Jordan	Western Asia and Northern Africa	Rural	Gas	1990	743.869	931.232	950.879
KAZ	Kazakhstan	Central Asia and Southern Asia	Rural	Gas	1990	491.285	3790.17	6656.37
KEN	Kenya	Sub-Saharan Africa	Rural	Gas	1990	0	19.4831	283.479
KIR	Kiribati	Oceania excluding Australia and New Zealand	Rural	Gas	1990	0	0.0117693	4.40245
KGZ	Kyrgyzstan	Central Asia and Southern Asia	Rural	Gas	1990	2.33932	198.193	1424.16
LAO	Lao People's Democratic Republic	Eastern Asia and South-eastern Asia	Rural	Gas	1990	0	0	7.8504
LSO	Lesotho	Sub-Saharan Africa	Rural	Gas	1990	3.43428	42.8604	198.657
LBR	Liberia	Sub-Saharan Africa	Rural	Gas	1990	0	0.00934908	61.1203
MDG	Madagascar	Sub-Saharan Africa	Rural	Gas	1990	0	3.72345	344.47
MWI	Malawi	Sub-Saharan Africa	Rural	Gas	1990	0	0.333862	47.9176
MYS	Malaysia	Eastern Asia and South-eastern Asia	Rural	Gas	1990	3539.29	8224.93	9045.68
MDV	Maldives	Central Asia and Southern Asia	Rural	Gas	1990	0.163881	20.3295	99.5771
MLI	Mali	Sub-Saharan Africa	Rural	Gas	1990	0	39.5945	887.586
MHL	Marshall Islands	Oceania excluding Australia and New Zealand	Rural	Gas	1990	0	0.04843	3.50706
MRT	Mauritania	Sub-Saharan Africa	Rural	Gas	1990	7.47599	78.4	279.891
MEX	Mexico	Latin America & the Caribbean	Rural	Gas	1990	1411.37	7012.17	14156.1
FSM	Micronesia, Federated States of	Oceania excluding Australia and New Zealand	Rural	Gas	1990	0	0.127558	5.78321
MNG	Mongolia	Eastern Asia and South-eastern Asia	Rural	Gas	1990	0	0	2.94117
MNE	Montenegro	Northern America and Europe	Rural	Gas	1990	0	3.19571	93.6993
MAR	Morocco	Western Asia and Northern Africa	Rural	Gas	1990	2010.87	9113.99	12631.2
MOZ	Mozambique	Sub-Saharan Africa	Rural	Gas	1990	0	4.12333	428.538
MMR	Myanmar	Eastern Asia and South-eastern Asia	Rural	Gas	1990	0	1.51855	1405.89
NAM	Namibia	Sub-Saharan Africa	Rural	Gas	1990	0.0102344	8.23357	101.294
NPL	Nepal	Central Asia and Southern Asia	Rural	Gas	1990	0	1.53803	1341.86
NIC	Nicaragua	Latin America & the Caribbean	Rural	Gas	1990	4.31563	56.8384	219.539
NER	Niger	Sub-Saharan Africa	Rural	Gas	1990	0	7.1883	201.583
NGA	Nigeria	Sub-Saharan Africa	Rural	Gas	1990	0	239.168	6538.89
NIU	Niue	Oceania excluding Australia and New Zealand	Rural	Gas	1990	0	0.0720349	0.950724
PAK	Pakistan	Central Asia and Southern Asia	Rural	Gas	1990	15.6985	1669.65	14242.7
PNG	Papua New Guinea	Oceania excluding Australia and New Zealand	Rural	Gas	1990	0	23.5379	388.312
PRY	Paraguay	Latin America & the Caribbean	Rural	Gas	1990	51.5062	208.31	477.386
PER	Peru	Latin America & the Caribbean	Rural	Gas	1990	1.82935	137.014	1258.73
PHL	Philippines	Eastern Asia and South-eastern Asia	Rural	Gas	1990	406.201	1925.63	5159.55
MDA	Moldova, Republic of	Northern America and Europe	Rural	Gas	1990	3.10922	152.446	1074.43
RUS	Russian Federation	Northern America and Europe	Rural	Gas	1990	4020.08	26151.9	39026.8
RWA	Rwanda	Sub-Saharan Africa	Rural	Gas	1990	0	0.136878	72.648
LCA	Saint Lucia	Latin America & the Caribbean	Rural	Gas	1990	33.7451	79.5615	97.1342
VCT	Saint Vincent and the Grenadines	Latin America & the Caribbean	Rural	Gas	1990	47.6983	60.0556	62.9792
WSM	Samoa	Oceania excluding Australia and New Zealand	Rural	Gas	1990	0.0166519	3.62041	39.9186
STP	Sao Tome And Principe	Sub-Saharan Africa	Rural	Gas	1990	0	0.0073807	3.98815
SEN	Senegal	Sub-Saharan Africa	Rural	Gas	1990	2.2149	82.2942	415.461
SRB	Serbia	Northern America and Europe	Rural	Gas	1990	1.65132	319.075	2347.47
SLE	Sierra Leone	Sub-Saharan Africa	Rural	Gas	1990	0	0	350.517
SLB	Solomon Islands	Oceania excluding Australia and New Zealand	Rural	Gas	1990	0	7.23855	123.16
SOM	Somalia	Sub-Saharan Africa	Rural	Gas	1990	0	0	69.8415
ZAF	South Africa	Sub-Saharan Africa	Rural	Gas	1990	58.189	395.072	1311.02
SSD	South Sudan	Sub-Saharan Africa	Rural	Gas	1990	0	17.9345	1397.53
LKA	Sri Lanka	Central Asia and Southern Asia	Rural	Gas	1990	70.7151	1858.94	8003.79
SDN	Sudan	Western Asia and Northern Africa	Rural	Gas	1990	1.43834	759.37	4757.89
SUR	Suriname	Latin America & the Caribbean	Rural	Gas	1990	5.4442	70.2706	131.319
SWZ	Eswatini	Sub-Saharan Africa	Rural	Gas	1990	0.583742	13.5617	67.267
SYR	Syrian Arab Republic	Western Asia and Northern Africa	Rural	Gas	1990	2786.5	5943.18	6353.72
TJK	Tajikistan	Central Asia and Southern Asia	Rural	Gas	1990	0.10833	25.6021	333.102
THA	Thailand	Eastern Asia and South-eastern Asia	Rural	Gas	1990	4967.22	10645.4	18437.3
MKD	North Macedonia	Northern America and Europe	Rural	Gas	1990	0	6.15959	244.922
TLS	Timor-Leste	Eastern Asia and South-eastern Asia	Rural	Gas	1990	0	0.172613	66.3194
TGO	Togo	Sub-Saharan Africa	Rural	Gas	1990	0	0	88.6281
TON	Tonga	Oceania excluding Australia and New Zealand	Rural	Gas	1990	1.61859	27.1289	64.5326
TUN	Tunisia	Western Asia and Northern Africa	Rural	Gas	1990	469.363	2631.65	3419.94
TUR	Turkey	Western Asia and Northern Africa	Rural	Gas	1990	911.823	13415.8	21563.6
TKM	Turkmenistan	Central Asia and Southern Asia	Rural	Gas	1990	1329.38	1919.7	2022.51
TUV	Tuvalu	Oceania excluding Australia and New Zealand	Rural	Gas	1990	0	0.327064	5.28423
UGA	Uganda	Sub-Saharan Africa	Rural	Gas	1990	0	0	54.9195
UKR	Ukraine	Northern America and Europe	Rural	Gas	1990	3389.15	12487.4	16703.9
TZA	Tanzania, United Republic of	Sub-Saharan Africa	Rural	Gas	1990	0	0	69.2402
UZB	Uzbekistan	Central Asia and Southern Asia	Rural	Gas	1990	1241.33	7212.18	11286.7
VUT	Vanuatu	Oceania excluding Australia and New Zealand	Rural	Gas	1990	0	3.50481	55.5338
VEN	Venezuela (Bolivarian Republic of)	Latin America & the Caribbean	Rural	Gas	1990	307.307	1975.96	3111.23
VNM	Viet Nam	Eastern Asia and South-eastern Asia	Rural	Gas	1990	0	5.98314	168.085
YEM	Yemen	Western Asia and Northern Africa	Rural	Gas	1990	180.137	3404.45	8371.08
ZMB	Zambia	Sub-Saharan Africa	Rural	Gas	1990	0	0.0486397	20.3326
ZWE	Zimbabwe	Sub-Saharan Africa	Rural	Gas	1990	0	16.1617	594.862
AFG	Afghanistan	Central Asia and Southern Asia	Rural	Electricity	1990	0	0	88.1541
ALB	Albania	Northern America and Europe	Rural	Electricity	1990	0	9.91929	362.26
DZA	Algeria	Western Asia and Northern Africa	Rural	Electricity	1990	0	92.5603	4294.39
AGO	Angola	Sub-Saharan Africa	Rural	Electricity	1990	0	12.3937	841.958
ARG	Argentina	Latin America & the Caribbean	Rural	Electricity	1990	0	3.02472	145.622
ARM	Armenia	Western Asia and Northern Africa	Rural	Electricity	1990	1.85557	87.0928	515.029
AZE	Azerbaijan	Western Asia and Northern Africa	Rural	Electricity	1990	15.5417	244.154	1015.21
BGD	Bangladesh	Central Asia and Southern Asia	Rural	Electricity	1990	0	8.51512	2291.48
BLR	Belarus	Northern America and Europe	Rural	Electricity	1990	0	64.1264	1438.52
BLZ	Belize	Latin America & the Caribbean	Rural	Electricity	1990	0	0.27096	2.50478
BEN	Benin	Sub-Saharan Africa	Rural	Electricity	1990	0	0	5.51303
BTN	Bhutan	Central Asia and Southern Asia	Rural	Electricity	1990	0	0.00449228	2.84002
BOL	Bolivia (Plurinational State of)	Latin America & the Caribbean	Rural	Electricity	1990	0	0.395945	15.8682
BIH	Bosnia and Herzegovina	Northern America and Europe	Rural	Electricity	1990	21.1732	806.972	2224.44
BWA	Botswana	Sub-Saharan Africa	Rural	Electricity	1990	0	0.832115	36.5913
BRA	Brazil	Latin America & the Caribbean	Rural	Electricity	1990	0	40.506	915.096
BFA	Burkina Faso	Sub-Saharan Africa	Rural	Electricity	1990	0	0	6.1548
BDI	Burundi	Sub-Saharan Africa	Rural	Electricity	1990	0	0.406064	237.436
CPV	Cabo Verde	Sub-Saharan Africa	Rural	Electricity	1990	0	0	0.619412
KHM	Cambodia	Eastern Asia and South-eastern Asia	Rural	Electricity	1990	0	0	51.8509
CMR	Cameroon	Sub-Saharan Africa	Rural	Electricity	1990	0	0	26.4497
CAF	Central African Republic	Sub-Saharan Africa	Rural	Electricity	1990	0	0	24.7571
TCD	Chad	Sub-Saharan Africa	Rural	Electricity	1990	0	0	402.852
CHN	China	Eastern Asia and South-eastern Asia	Rural	Electricity	1990	0	9900.62	132259
COL	Colombia	Latin America & the Caribbean	Rural	Electricity	1990	633.708	1427.13	2494.83
COM	Comoros	Sub-Saharan Africa	Rural	Electricity	1990	0	0	0.0148442
COG	Congo	Sub-Saharan Africa	Rural	Electricity	1990	0	1.81138	94.7879
COK	Cook Islands	Oceania excluding Australia and New Zealand	Rural	Electricity	1990	0	0.0228203	5.58251
CRI	Costa Rica	Latin America & the Caribbean	Rural	Electricity	1990	125.752	546.669	1083.53
CIV	Côte d'Ivoire	Sub-Saharan Africa	Rural	Electricity	1990	0	6.02717	625.506
PRK	Democratic Peoples Republic of Korea	Eastern Asia and South-eastern Asia	Rural	Electricity	1990	0	13.8501	1230.46
COD	Democratic Republic of the Congo	Sub-Saharan Africa	Rural	Electricity	1990	0	142.146	8664.96
DJI	Djibouti	Sub-Saharan Africa	Rural	Electricity	1990	0	0.129883	9.44032
DMA	Dominica	Latin America & the Caribbean	Rural	Electricity	1990	0	0.00209496	3.3365
DOM	Dominican Republic	Latin America & the Caribbean	Rural	Electricity	1990	0	1.51171	21.9681
ECU	Ecuador	Latin America & the Caribbean	Rural	Electricity	1990	0	21.1321	349.371
EGY	Egypt	Western Asia and Northern Africa	Rural	Electricity	1990	0	115.524	2272.8
SLV	El Salvador	Latin America & the Caribbean	Rural	Electricity	1990	0	14.5812	567.299
GNQ	Equatorial Guinea	Sub-Saharan Africa	Rural	Electricity	1990	0	0.937287	73.1647
ERI	Eritrea	Sub-Saharan Africa	Rural	Electricity	1990	0	0	0.227226
ETH	Ethiopia	Sub-Saharan Africa	Rural	Electricity	1990	0	17.6473	3157.83
FJI	Fiji	Oceania excluding Australia and New Zealand	Rural	Electricity	1990	0	4.25012	47.1032
GAB	Gabon	Sub-Saharan Africa	Rural	Electricity	1990	0	0	0.13516
GMB	Gambia	Sub-Saharan Africa	Rural	Electricity	1990	0	0.0395891	8.07221
GEO	Georgia	Western Asia and Northern Africa	Rural	Electricity	1990	0	59.9394	924.632
GHA	Ghana	Sub-Saharan Africa	Rural	Electricity	1990	0	13.7604	119.873
GRD	Grenada	Latin America & the Caribbean	Rural	Electricity	1990	0	0.0948665	8.19254
GTM	Guatemala	Latin America & the Caribbean	Rural	Electricity	1990	0	23.4297	891.885
GIN	Guinea	Sub-Saharan Africa	Rural	Electricity	1990	0	0.0869604	26.7012
GNB	Guinea-Bissau	Sub-Saharan Africa	Rural	Electricity	1990	0	0.0490139	18.3272
GUY	Guyana	Latin America & the Caribbean	Rural	Electricity	1990	0	0.800826	19.338
HTI	Haiti	Latin America & the Caribbean	Rural	Electricity	1990	0	0	11.8781
HND	Honduras	Latin America & the Caribbean	Rural	Electricity	1990	0	19.9447	334.928
IND	India	Central Asia and Southern Asia	Rural	Electricity	1990	0	307.722	3265.26
IDN	Indonesia	Eastern Asia and South-eastern Asia	Rural	Electricity	1990	5.03782	429.474	2319.95
IRN	Iran (Islamic Republic of)	Central Asia and Southern Asia	Rural	Electricity	1990	0	40.8819	4564.8
IRQ	Iraq	Western Asia and Northern Africa	Rural	Electricity	1990	0	3.94262	317.551
JAM	Jamaica	Latin America & the Caribbean	Rural	Electricity	1990	0	3.84842	79.871
JOR	Jordan	Western Asia and Northern Africa	Rural	Electricity	1990	0	0.256766	38.5774
KAZ	Kazakhstan	Central Asia and Southern Asia	Rural	Electricity	1990	0.0723371	116.318	1194.92
KEN	Kenya	Sub-Saharan Africa	Rural	Electricity	1990	0	62.7355	559.223
KIR	Kiribati	Oceania excluding Australia and New Zealand	Rural	Electricity	1990	0	0.00094154	1.30911
KGZ	Kyrgyzstan	Central Asia and Southern Asia	Rural	Electricity	1990	2.85698	195.703	1391.79
LAO	Lao People's Democratic Republic	Eastern Asia and South-eastern Asia	Rural	Electricity	1990	0	0	50.3506
LSO	Lesotho	Sub-Saharan Africa	Rural	Electricity	1990	0	0.234587	52.247
LBR	Liberia	Sub-Saharan Africa	Rural	Electricity	1990	0	0	35.4538
MDG	Madagascar	Sub-Saharan Africa	Rural	Electricity	1990	0	0.177307	216.383
MWI	Malawi	Sub-Saharan Africa	Rural	Electricity	1990	0	12.7702	258.122
MYS	Malaysia	Eastern Asia and South-eastern Asia	Rural	Electricity	1990	0	10.6412	1677.76
MDV	Maldives	Central Asia and Southern Asia	Rural	Electricity	1990	0	0.00662144	2.35131
MLI	Mali	Sub-Saharan Africa	Rural	Electricity	1990	0	0	109.385
MHL	Marshall Islands	Oceania excluding Australia and New Zealand	Rural	Electricity	1990	0	0.0748764	4.57097
MRT	Mauritania	Sub-Saharan Africa	Rural	Electricity	1990	0	4.11432	72.8278
MEX	Mexico	Latin America & the Caribbean	Rural	Electricity	1990	0	33.7886	415.014
FSM	Micronesia, Federated States of	Oceania excluding Australia and New Zealand	Rural	Electricity	1990	0	13.9045	48.9382
MNG	Mongolia	Eastern Asia and South-eastern Asia	Rural	Electricity	1990	0	12.9087	178.733
MNE	Montenegro	Northern America and Europe	Rural	Electricity	1990	7.68424	135.388	298.965
MAR	Morocco	Western Asia and Northern Africa	Rural	Electricity	1990	0	1.66918	745.867
MOZ	Mozambique	Sub-Saharan Africa	Rural	Electricity	1990	0	36.017	1273.12
MMR	Myanmar	Eastern Asia and South-eastern Asia	Rural	Electricity	1990	0	150.033	9430.25
NAM	Namibia	Sub-Saharan Africa	Rural	Electricity	1990	0.051172	22.2137	149.741
NPL	Nepal	Central Asia and Southern Asia	Rural	Electricity	1990	0	0	1415.37
NIC	Nicaragua	Latin America & the Caribbean	Rural	Electricity	1990	0	1.14746	27.4424
NER	Niger	Sub-Saharan Africa	Rural	Electricity	1990	0	0.135628	46.5256
NGA	Nigeria	Sub-Saharan Africa	Rural	Electricity	1990	0	72.6883	3709.17
NIU	Niue	Oceania excluding Australia and New Zealand	Rural	Electricity	1990	0.0407194	0.664678	1.49349
PAK	Pakistan	Central Asia and Southern Asia	Rural	Electricity	1990	0	1.4951	182.421
PNG	Papua New Guinea	Oceania excluding Australia and New Zealand	Rural	Electricity	1990	0	17.8368	368.493
PRY	Paraguay	Latin America & the Caribbean	Rural	Electricity	1990	0	0.021619	4.8232
PER	Peru	Latin America & the Caribbean	Rural	Electricity	1990	0	1.15395	55.0602
PHL	Philippines	Eastern Asia and South-eastern Asia	Rural	Electricity	1990	32.5043	371.102	1458.6
MDA	Moldova, Republic of	Northern America and Europe	Rural	Electricity	1990	0.0232335	29.9015	444.777
RUS	Russian Federation	Northern America and Europe	Rural	Electricity	1990	118.04	12182.4	34599.8
RWA	Rwanda	Sub-Saharan Africa	Rural	Electricity	1990	0	5.81731	147.505
LCA	Saint Lucia	Latin America & the Caribbean	Rural	Electricity	1990	0	0.485699	8.37758
VCT	Saint Vincent and the Grenadines	Latin America & the Caribbean	Rural	Electricity	1990	0	0.0453514	5.46734
WSM	Samoa	Oceania excluding Australia and New Zealand	Rural	Electricity	1990	0.00128338	3.72694	52.6656
STP	Sao Tome And Principe	Sub-Saharan Africa	Rural	Electricity	1990	0	0	0.57892
SEN	Senegal	Sub-Saharan Africa	Rural	Electricity	1990	0	0.0923357	19.4436
SRB	Serbia	Northern America and Europe	Rural	Electricity	1990	24.8902	999.339	3613.41
SLE	Sierra Leone	Sub-Saharan Africa	Rural	Electricity	1990	0	0.115134	504.449
SLB	Solomon Islands	Oceania excluding Australia and New Zealand	Rural	Electricity	1990	0	0.0107676	13.1017
SOM	Somalia	Sub-Saharan Africa	Rural	Electricity	1990	0	0	34.1526
ZAF	South Africa	Sub-Saharan Africa	Rural	Electricity	1990	985.924	3064.29	6166.46
SSD	South Sudan	Sub-Saharan Africa	Rural	Electricity	1990	0	0	11.7137
LKA	Sri Lanka	Central Asia and Southern Asia	Rural	Electricity	1990	0	100.517	3009.78
SDN	Sudan	Western Asia and Northern Africa	Rural	Electricity	1990	0	0.143834	61.8809
SUR	Suriname	Latin America & the Caribbean	Rural	Electricity	1990	0	0.504458	25.9084
SWZ	Eswatini	Sub-Saharan Africa	Rural	Electricity	1990	0.687362	17.5724	86.533
SYR	Syrian Arab Republic	Western Asia and Northern Africa	Rural	Electricity	1990	0	52.9784	2376.36
TJK	Tajikistan	Central Asia and Southern Asia	Rural	Electricity	1990	2.81568	174.051	944.542
THA	Thailand	Eastern Asia and South-eastern Asia	Rural	Electricity	1990	219.228	1367.14	3596.17
MKD	North Macedonia	Northern America and Europe	Rural	Electricity	1990	19.7836	350.561	766.463
TLS	Timor-Leste	Eastern Asia and South-eastern Asia	Rural	Electricity	1990	0	0.0476173	30.6611
TGO	Togo	Sub-Saharan Africa	Rural	Electricity	1990	0	0	15.0095
TON	Tonga	Oceania excluding Australia and New Zealand	Rural	Electricity	1990	0	2.01929	31.2341
TUN	Tunisia	Western Asia and Northern Africa	Rural	Electricity	1990	0	14.6106	704.455
TUR	Turkey	Western Asia and Northern Africa	Rural	Electricity	1990	0	2087.01	17148.2
TKM	Turkmenistan	Central Asia and Southern Asia	Rural	Electricity	1990	0	11.7864	269.892
TUV	Tuvalu	Oceania excluding Australia and New Zealand	Rural	Electricity	1990	0	0.00336546	1.67669
UGA	Uganda	Sub-Saharan Africa	Rural	Electricity	1990	0	4.49715	330.001
UKR	Ukraine	Northern America and Europe	Rural	Electricity	1990	0.171083	740.532	7323.82
TZA	Tanzania, United Republic of	Sub-Saharan Africa	Rural	Electricity	1990	0	0.826071	347.368
UZB	Uzbekistan	Central Asia and Southern Asia	Rural	Electricity	1990	0	250.16	4022.53
VUT	Vanuatu	Oceania excluding Australia and New Zealand	Rural	Electricity	1990	0	0.723489	28.752
VEN	Venezuela (Bolivarian Republic of)	Latin America & the Caribbean	Rural	Electricity	1990	0	38.5981	2403.15
VNM	Viet Nam	Eastern Asia and South-eastern Asia	Rural	Electricity	1990	0	36.1708	716.998
YEM	Yemen	Western Asia and Northern Africa	Rural	Electricity	1990	0	36.1791	1885.61
ZMB	Zambia	Sub-Saharan Africa	Rural	Electricity	1990	0	8.41467	166.23
ZWE	Zimbabwe	Sub-Saharan Africa	Rural	Electricity	1990	15.5435	460.049	2452.15
AFG	Afghanistan	Central Asia and Southern Asia	Rural	Biomass	1990	4565.4	9226.04	9653.53
ALB	Albania	Northern America and Europe	Rural	Biomass	1990	562.207	1880.75	2085.18
DZA	Algeria	Western Asia and Northern Africa	Rural	Biomass	1990	0	331.876	6520.87
AGO	Angola	Sub-Saharan Africa	Rural	Biomass	1990	323.4	3633.5	7041.79
ARG	Argentina	Latin America & the Caribbean	Rural	Biomass	1990	727.385	2061.92	3194.71
ARM	Armenia	Western Asia and Northern Africa	Rural	Biomass	1990	327.543	928.263	1136.29
AZE	Azerbaijan	Western Asia and Northern Africa	Rural	Biomass	1990	1790.31	2888.15	3298.13
BGD	Bangladesh	Central Asia and Southern Asia	Rural	Biomass	1990	65811.1	83042	85146.9
BLR	Belarus	Northern America and Europe	Rural	Biomass	1990	0.277186	627.187	2986.6
BLZ	Belize	Latin America & the Caribbean	Rural	Biomass	1990	35.6138	54.3364	70.5277
BEN	Benin	Sub-Saharan Africa	Rural	Biomass	1990	2843.88	3205.19	3261.6
BTN	Bhutan	Central Asia and Southern Asia	Rural	Biomass	1990	323.349	436.394	449.224
BOL	Bolivia (Plurinational State of)	Latin America & the Caribbean	Rural	Biomass	1990	2273.1	2655.05	2892.81
BIH	Bosnia and Herzegovina	Northern America and Europe	Rural	Biomass	1990	234.098	1665.64	2644.15
BWA	Botswana	Sub-Saharan Africa	Rural	Biomass	1990	406.486	692.52	794.218
BRA	Brazil	Latin America & the Caribbean	Rural	Biomass	1990	15529.3	24801	32122.9
BFA	Burkina Faso	Sub-Saharan Africa	Rural	Biomass	1990	6622.69	7295.96	7559.51
BDI	Burundi	Sub-Saharan Africa	Rural	Biomass	1990	3306.26	4918.28	5075.65
CPV	Cabo Verde	Sub-Saharan Africa	Rural	Biomass	1990	36.5305	114.374	173.869
KHM	Cambodia	Eastern Asia and South-eastern Asia	Rural	Biomass	1990	6332.73	7250.22	7546.89
CMR	Cameroon	Sub-Saharan Africa	Rural	Biomass	1990	4131.88	6594.72	7064.76
CAF	Central African Republic	Sub-Saharan Africa	Rural	Biomass	1990	929.192	1804.01	1857.21
TCD	Chad	Sub-Saharan Africa	Rural	Biomass	1990	663.683	3334.79	4660.93
CHN	China	Eastern Asia and South-eastern Asia	Rural	Biomass	1990	29971.6	240849	595377
COL	Colombia	Latin America & the Caribbean	Rural	Biomass	1990	4752.78	6764.5	8516.01
COM	Comoros	Sub-Saharan Africa	Rural	Biomass	1990	208.479	285.902	296.849
COG	Congo	Sub-Saharan Africa	Rural	Biomass	1990	231.775	915.929	1107.36
COK	Cook Islands	Oceania excluding Australia and New Zealand	Rural	Biomass	1990	0	3.40441	7.76192
CRI	Costa Rica	Latin America & the Caribbean	Rural	Biomass	1990	47.6422	329.19	953.155
CIV	Côte d'Ivoire	Sub-Saharan Africa	Rural	Biomass	1990	999.343	5263.54	7306.57
PRK	Democratic Peoples Republic of Korea	Eastern Asia and South-eastern Asia	Rural	Biomass	1990	1040.56	6934.9	8429.83
COD	Democratic Republic of the Congo	Sub-Saharan Africa	Rural	Biomass	1990	2783.74	18753.7	23923.3
DJI	Djibouti	Sub-Saharan Africa	Rural	Biomass	1990	10.4255	47.3379	101.844
DMA	Dominica	Latin America & the Caribbean	Rural	Biomass	1990	0	11.0008	25.6884
DOM	Dominican Republic	Latin America & the Caribbean	Rural	Biomass	1990	1157.61	1777.16	2360.13
ECU	Ecuador	Latin America & the Caribbean	Rural	Biomass	1990	24.5234	2285.62	3813.4
EGY	Egypt	Western Asia and Northern Africa	Rural	Biomass	1990	0.324506	1002.24	9396.73
SLV	El Salvador	Latin America & the Caribbean	Rural	Biomass	1990	849.916	2149.28	2642.77
GNQ	Equatorial Guinea	Sub-Saharan Africa	Rural	Biomass	1990	3.79065	155.091	275.429
ERI	Eritrea	Sub-Saharan Africa	Rural	Biomass	1990	1882.91	2374.45	2516.53
ETH	Ethiopia	Sub-Saharan Africa	Rural	Biomass	1990	26546.4	38775.4	41942.3
FJI	Fiji	Oceania excluding Australia and New Zealand	Rural	Biomass	1990	132.112	341.834	423.301
GAB	Gabon	Sub-Saharan Africa	Rural	Biomass	1990	130.358	259.996	293.034
GMB	Gambia	Sub-Saharan Africa	Rural	Biomass	1990	469.792	543.077	564.964
GEO	Georgia	Western Asia and Northern Africa	Rural	Biomass	1990	954.264	2184.59	2430.25
GHA	Ghana	Sub-Saharan Africa	Rural	Biomass	1990	7414.38	8355.81	8984.89
GRD	Grenada	Latin America & the Caribbean	Rural	Biomass	1990	0.00833287	4.89684	34.9547
GTM	Guatemala	Latin America & the Caribbean	Rural	Biomass	1990	1637.4	3862.3	5153.77
GIN	Guinea	Sub-Saharan Africa	Rural	Biomass	1990	3490.87	4154.97	4339.85
GNB	Guinea-Bissau	Sub-Saharan Africa	Rural	Biomass	1990	557.588	685.76	700.184
GUY	Guyana	Latin America & the Caribbean	Rural	Biomass	1990	4.65592	68.1592	251.31
HTI	Haiti	Latin America & the Caribbean	Rural	Biomass	1990	1744.67	3869.22	4888.87
HND	Honduras	Latin America & the Caribbean	Rural	Biomass	1990	1203.84	2668.84	2949.48
IND	India	Central Asia and Southern Asia	Rural	Biomass	1990	563923	606291	632120
IDN	Indonesia	Eastern Asia and South-eastern Asia	Rural	Biomass	1990	93344.7	109860	119912
IRN	Iran (Islamic Republic of)	Central Asia and Southern Asia	Rural	Biomass	1990	0	2.94645	7032.98
IRQ	Iraq	Western Asia and Northern Africa	Rural	Biomass	1990	42.9044	1747.21	4876.09
JAM	Jamaica	Latin America & the Caribbean	Rural	Biomass	1990	452.354	937.514	1191.49
JOR	Jordan	Western Asia and Northern Africa	Rural	Biomass	1990	0	0.836866	102.153
KAZ	Kazakhstan	Central Asia and Southern Asia	Rural	Biomass	1990	0.289348	158.057	1778.18
KEN	Kenya	Sub-Saharan Africa	Rural	Biomass	1990	16889	18798.7	19430.3
KIR	Kiribati	Oceania excluding Australia and New Zealand	Rural	Biomass	1990	12.0458	44.9503	47.077
KGZ	Kyrgyzstan	Central Asia and Southern Asia	Rural	Biomass	1990	0.136047	146.4	1625.31
LAO	Lao People's Democratic Republic	Eastern Asia and South-eastern Asia	Rural	Biomass	1990	3291.31	3548.47	3600.56
LSO	Lesotho	Sub-Saharan Africa	Rural	Biomass	1990	434.024	856.262	1215.49
LBR	Liberia	Sub-Saharan Africa	Rural	Biomass	1990	243.002	818.83	933.861
MDG	Madagascar	Sub-Saharan Africa	Rural	Biomass	1990	6435.62	8482.9	8859.23
MWI	Malawi	Sub-Saharan Africa	Rural	Biomass	1990	7806.04	8261.47	8345.23
MYS	Malaysia	Eastern Asia and South-eastern Asia	Rural	Biomass	1990	0	278.664	4202.15
MDV	Maldives	Central Asia and Southern Asia	Rural	Biomass	1990	50.3535	136.047	163.891
MLI	Mali	Sub-Saharan Africa	Rural	Biomass	1990	4907.27	6264.36	6490.05
MHL	Marshall Islands	Oceania excluding Australia and New Zealand	Rural	Biomass	1990	2.81847	14.7477	16.5277
MRT	Mauritania	Sub-Saharan Africa	Rural	Biomass	1990	591.337	929.48	1131.38
MEX	Mexico	Latin America & the Caribbean	Rural	Biomass	1990	9789.99	16879.5	22782.3
FSM	Micronesia, Federated States of	Oceania excluding Australia and New Zealand	Rural	Biomass	1990	0.0192409	9.42428	36.03
MNG	Mongolia	Eastern Asia and South-eastern Asia	Rural	Biomass	1990	558.958	864.942	936.172
MNE	Montenegro	Northern America and Europe	Rural	Biomass	1990	3.70854	114.502	286.585
MAR	Morocco	Western Asia and Northern Africa	Rural	Biomass	1990	74.5643	3118.54	10444.5
MOZ	Mozambique	Sub-Saharan Africa	Rural	Biomass	1990	8300.53	9825.1	9935.64
MMR	Myanmar	Eastern Asia and South-eastern Asia	Rural	Biomass	1990	8758.21	26056.5	30223.4
NAM	Namibia	Sub-Saharan Africa	Rural	Biomass	1990	794.02	976.489	1022.32
NPL	Nepal	Central Asia and Southern Asia	Rural	Biomass	1990	10957	14066.9	16374.3
NIC	Nicaragua	Latin America & the Caribbean	Rural	Biomass	1990	1605.66	1833.58	1929.4
NER	Niger	Sub-Saharan Africa	Rural	Biomass	1990	5882.24	6651.62	6781.14
NGA	Nigeria	Sub-Saharan Africa	Rural	Biomass	1990	30407.6	60929.6	66664.9
NIU	Niue	Oceania excluding Australia and New Zealand	Rural	Biomass	1990	0	8.045e-05	0.0437793
PAK	Pakistan	Central Asia and Southern Asia	Rural	Biomass	1990	50521.4	69835.7	74583.1
PNG	Papua New Guinea	Oceania excluding Australia and New Zealand	Rural	Biomass	1990	2183.54	3387.28	3666.01
PRY	Paraguay	Latin America & the Caribbean	Rural	Biomass	1990	1617.54	1889.48	2065.08
PER	Peru	Latin America & the Caribbean	Rural	Biomass	1990	3316.47	5917.27	6718.02
PHL	Philippines	Eastern Asia and South-eastern Asia	Rural	Biomass	1990	20807	27148.4	30996
MDA	Moldova, Republic of	Northern America and Europe	Rural	Biomass	1990	781.595	2051.1	2310.55
RUS	Russian Federation	Northern America and Europe	Rural	Biomass	1990	0	0	4777.2
RWA	Rwanda	Sub-Saharan Africa	Rural	Biomass	1990	6388.97	6754.21	6841.57
LCA	Saint Lucia	Latin America & the Caribbean	Rural	Biomass	1990	0	7.4949	26.5461
VCT	Saint Vincent and the Grenadines	Latin America & the Caribbean	Rural	Biomass	1990	0	0.329427	7.89125
WSM	Samoa	Oceania excluding Australia and New Zealand	Rural	Biomass	1990	17.5097	81.8655	123.558
STP	Sao Tome And Principe	Sub-Saharan Africa	Rural	Biomass	1990	8.1245	52.3481	64.028
SEN	Senegal	Sub-Saharan Africa	Rural	Biomass	1990	3718.19	4462.89	4609.77
SRB	Serbia	Northern America and Europe	Rural	Biomass	1990	314.391	2638.5	4505.62
SLE	Sierra Leone	Sub-Saharan Africa	Rural	Biomass	1990	690.402	2458.76	2872.11
SLB	Solomon Islands	Oceania excluding Australia and New Zealand	Rural	Biomass	1990	105.805	256.367	269.175
SOM	Somalia	Sub-Saharan Africa	Rural	Biomass	1990	1219.36	4205.66	5182.4
ZAF	South Africa	Sub-Saharan Africa	Rural	Biomass	1990	4837.78	9221.6	13673
SSD	South Sudan	Sub-Saharan Africa	Rural	Biomass	1990	1728	4685.41	5002.2
LKA	Sri Lanka	Central Asia and Southern Asia	Rural	Biomass	1990	2896.67	10696	13895.2
SDN	Sudan	Western Asia and Northern Africa	Rural	Biomass	1990	9433.37	13537.6	14377.3
SUR	Suriname	Latin America & the Caribbean	Rural	Biomass	1990	2.92624	55.2703	130.169
SWZ	Eswatini	Sub-Saharan Africa	Rural	Biomass	1990	488.831	628.682	680.689
SYR	Syrian Arab Republic	Western Asia and Northern Africa	Rural	Biomass	1990	0	29.0157	1626.56
TJK	Tajikistan	Central Asia and Southern Asia	Rural	Biomass	1990	2308.74	3300.71	3591.15
THA	Thailand	Eastern Asia and South-eastern Asia	Rural	Biomass	1990	6107.71	12154.9	19309.4
MKD	North Macedonia	Northern America and Europe	Rural	Biomass	1990	34.9247	421.481	807.832
TLS	Timor-Leste	Eastern Asia and South-eastern Asia	Rural	Biomass	1990	247.402	573.378	595.216
TGO	Togo	Sub-Saharan Africa	Rural	Biomass	1990	583.68	2144.13	2668.45
TON	Tonga	Oceania excluding Australia and New Zealand	Rural	Biomass	1990	1.68819	31.0347	69.8687
TUN	Tunisia	Western Asia and Northern Africa	Rural	Biomass	1990	0	219.54	2209.48
TUR	Turkey	Western Asia and Northern Africa	Rural	Biomass	1990	0	1558.83	16391.9
TKM	Turkmenistan	Central Asia and Southern Asia	Rural	Biomass	1990	0	48.5622	574.922
TUV	Tuvalu	Oceania excluding Australia and New Zealand	Rural	Biomass	1990	0	0.237025	5.33603
UGA	Uganda	Sub-Saharan Africa	Rural	Biomass	1990	13893	15018.5	15457.8
UKR	Ukraine	Northern America and Europe	Rural	Biomass	1990	5.98362	1622.55	9801.95
TZA	Tanzania, United Republic of	Sub-Saharan Africa	Rural	Biomass	1990	17885.2	20536.8	20651.8
UZB	Uzbekistan	Central Asia and Southern Asia	Rural	Biomass	1990	207.777	3727.33	10237.9
VUT	Vanuatu	Oceania excluding Australia and New Zealand	Rural	Biomass	1990	22.7413	102.585	118.986
VEN	Venezuela (Bolivarian Republic of)	Latin America & the Caribbean	Rural	Biomass	1990	0	238.034	2516.92
VNM	Viet Nam	Eastern Asia and South-eastern Asia	Rural	Biomass	1990	46420.2	51959.2	54082.2
YEM	Yemen	Western Asia and Northern Africa	Rural	Biomass	1990	331.646	4914.2	9167.84
ZMB	Zambia	Sub-Saharan Africa	Rural	Biomass	1990	4135.15	4528.36	4763.06
ZWE	Zimbabwe	Sub-Saharan Africa	Rural	Biomass	1990	4438.01	6583.61	7187.61
AFG	Afghanistan	Central Asia and Southern Asia	Rural	Charcoal	1990	0	110.069	3716.46
ALB	Albania	Northern America and Europe	Rural	Charcoal	1990	0	2.84749	218.756
DZA	Algeria	Western Asia and Northern Africa	Rural	Charcoal	1990	0	36.0681	2506.37
AGO	Angola	Sub-Saharan Africa	Rural	Charcoal	1990	120.353	2363.83	6595.94
ARG	Argentina	Latin America & the Caribbean	Rural	Charcoal	1990	0	0	24.5407
ARM	Armenia	Western Asia and Northern Africa	Rural	Charcoal	1990	0	23.4115	399.671
AZE	Azerbaijan	Western Asia and Northern Africa	Rural	Charcoal	1990	0	19.5967	638.447
BGD	Bangladesh	Central Asia and Southern Asia	Rural	Charcoal	1990	0	41.7241	6565.2
BLR	Belarus	Northern America and Europe	Rural	Charcoal	1990	0	0	33.8245
BLZ	Belize	Latin America & the Caribbean	Rural	Charcoal	1990	0	0	0.337715
BEN	Benin	Sub-Saharan Africa	Rural	Charcoal	1990	0	0.0326167	168.967
BTN	Bhutan	Central Asia and Southern Asia	Rural	Charcoal	1990	0	0	0.224839
BOL	Bolivia (Plurinational State of)	Latin America & the Caribbean	Rural	Charcoal	1990	0	0	0.517774
BIH	Bosnia and Herzegovina	Northern America and Europe	Rural	Charcoal	1990	0	6.14167	258.956
BWA	Botswana	Sub-Saharan Africa	Rural	Charcoal	1990	0	0	5.63278
BRA	Brazil	Latin America & the Caribbean	Rural	Charcoal	1990	0	36.6112	3764.79
BFA	Burkina Faso	Sub-Saharan Africa	Rural	Charcoal	1990	2.88565	152.408	645.948
BDI	Burundi	Sub-Saharan Africa	Rural	Charcoal	1990	0	89.1819	1619.45
CPV	Cabo Verde	Sub-Saharan Africa	Rural	Charcoal	1990	0	0.00764176	2.37664
KHM	Cambodia	Eastern Asia and South-eastern Asia	Rural	Charcoal	1990	2.65052	160.926	835.226
CMR	Cameroon	Sub-Saharan Africa	Rural	Charcoal	1990	0	0	267.433
CAF	Central African Republic	Sub-Saharan Africa	Rural	Charcoal	1990	0	27.3381	817.007
TCD	Chad	Sub-Saharan Africa	Rural	Charcoal	1990	0.377372	622.924	3383.83
CHN	China	Eastern Asia and South-eastern Asia	Rural	Charcoal	1990	0	0	10638.9
COL	Colombia	Latin America & the Caribbean	Rural	Charcoal	1990	0	0	605.619
COM	Comoros	Sub-Saharan Africa	Rural	Charcoal	1990	0	0.37556	20.2266
COG	Congo	Sub-Saharan Africa	Rural	Charcoal	1990	0.0557348	102.87	755.61
COK	Cook Islands	Oceania excluding Australia and New Zealand	Rural	Charcoal	1990	0	0	0.12685
CRI	Costa Rica	Latin America & the Caribbean	Rural	Charcoal	1990	0	0	6.51779
CIV	Côte d'Ivoire	Sub-Saharan Africa	Rural	Charcoal	1990	18.8237	1496.9	5909.65
PRK	Democratic Peoples Republic of Korea	Eastern Asia and South-eastern Asia	Rural	Charcoal	1990	0	0.0844519	231.221
COD	Democratic Republic of the Congo	Sub-Saharan Africa	Rural	Charcoal	1990	4.79023	3121.46	19673.4
DJI	Djibouti	Sub-Saharan Africa	Rural	Charcoal	1990	0.0198374	1.89928	12.7387
DMA	Dominica	Latin America & the Caribbean	Rural	Charcoal	1990	0	1.3087	17.4536
DOM	Dominican Republic	Latin America & the Caribbean	Rural	Charcoal	1990	0	0	933.174
ECU	Ecuador	Latin America & the Caribbean	Rural	Charcoal	1990	0	0	1911.37
EGY	Egypt	Western Asia and Northern Africa	Rural	Charcoal	1990	0	93.1333	2936.38
SLV	El Salvador	Latin America & the Caribbean	Rural	Charcoal	1990	0	10.3161	244.606
GNQ	Equatorial Guinea	Sub-Saharan Africa	Rural	Charcoal	1990	0	4.48867	145.26
ERI	Eritrea	Sub-Saharan Africa	Rural	Charcoal	1990	0	28.8325	286.664
ETH	Ethiopia	Sub-Saharan Africa	Rural	Charcoal	1990	0	49.1604	1828.71
FJI	Fiji	Oceania excluding Australia and New Zealand	Rural	Charcoal	1990	0	0	4.55664
GAB	Gabon	Sub-Saharan Africa	Rural	Charcoal	1990	0	0	9.57685
GMB	Gambia	Sub-Saharan Africa	Rural	Charcoal	1990	0	0.299746	29.5022
GEO	Georgia	Western Asia and Northern Africa	Rural	Charcoal	1990	0	5.43688	340.934
GHA	Ghana	Sub-Saharan Africa	Rural	Charcoal	1990	208.626	766.723	1664.36
GRD	Grenada	Latin America & the Caribbean	Rural	Charcoal	1990	0	1.25442	18.8392
GTM	Guatemala	Latin America & the Caribbean	Rural	Charcoal	1990	0	0.107476	125.508
GIN	Guinea	Sub-Saharan Africa	Rural	Charcoal	1990	0	59.1766	538.821
GNB	Guinea-Bissau	Sub-Saharan Africa	Rural	Charcoal	1990	0	7.57614	129.536
GUY	Guyana	Latin America & the Caribbean	Rural	Charcoal	1990	0	0	7.35426
HTI	Haiti	Latin America & the Caribbean	Rural	Charcoal	1990	112.259	1046.64	3206.47
HND	Honduras	Latin America & the Caribbean	Rural	Charcoal	1990	0	0	1.44717
IND	India	Central Asia and Southern Asia	Rural	Charcoal	1990	0	0	12017.5
IDN	Indonesia	Eastern Asia and South-eastern Asia	Rural	Charcoal	1990	0	488.039	3436.45
IRN	Iran (Islamic Republic of)	Central Asia and Southern Asia	Rural	Charcoal	1990	0	0	858.165
IRQ	Iraq	Western Asia and Northern Africa	Rural	Charcoal	1990	0	0	11.5408
JAM	Jamaica	Latin America & the Caribbean	Rural	Charcoal	1990	0	0.392196	74.2614
JOR	Jordan	Western Asia and Northern Africa	Rural	Charcoal	1990	0	0	29.2195
KAZ	Kazakhstan	Central Asia and Southern Asia	Rural	Charcoal	1990	0	20.3267	1347.54
KEN	Kenya	Sub-Saharan Africa	Rural	Charcoal	1990	1.75348	287.278	1864.03
KIR	Kiribati	Oceania excluding Australia and New Zealand	Rural	Charcoal	1990	0	0	2.6027
KGZ	Kyrgyzstan	Central Asia and Southern Asia	Rural	Charcoal	1990	0	40.7324	1009.29
LAO	Lao People's Democratic Republic	Eastern Asia and South-eastern Asia	Rural	Charcoal	1990	0	19.1759	205.547
LSO	Lesotho	Sub-Saharan Africa	Rural	Charcoal	1990	0	0.0551969	18.8125
LBR	Liberia	Sub-Saharan Africa	Rural	Charcoal	1990	0	71.5485	627.047
MDG	Madagascar	Sub-Saharan Africa	Rural	Charcoal	1990	0	238.389	2264.13
MWI	Malawi	Sub-Saharan Africa	Rural	Charcoal	1990	0	22.1184	352.561
MYS	Malaysia	Eastern Asia and South-eastern Asia	Rural	Charcoal	1990	0	5.97719	624.385
MDV	Maldives	Central Asia and Southern Asia	Rural	Charcoal	1990	0	0	2.78134
MLI	Mali	Sub-Saharan Africa	Rural	Charcoal	1990	0	0.259636	181.722
MHL	Marshall Islands	Oceania excluding Australia and New Zealand	Rural	Charcoal	1990	0	0.02281	3.04967
MRT	Mauritania	Sub-Saharan Africa	Rural	Charcoal	1990	30.5122	187.941	532.367
MEX	Mexico	Latin America & the Caribbean	Rural	Charcoal	1990	0	1.34179	359.44
FSM	Micronesia, Federated States of	Oceania excluding Australia and New Zealand	Rural	Charcoal	1990	0	0	0.150157
MNG	Mongolia	Eastern Asia and South-eastern Asia	Rural	Charcoal	1990	0	0	7.95073
MNE	Montenegro	Northern America and Europe	Rural	Charcoal	1990	0	0.263646	39.4161
MAR	Morocco	Western Asia and Northern Africa	Rural	Charcoal	1990	0	4.87915	520.358
MOZ	Mozambique	Sub-Saharan Africa	Rural	Charcoal	1990	0	1.68908	380.742
MMR	Myanmar	Eastern Asia and South-eastern Asia	Rural	Charcoal	1990	13.3632	2655.79	18082.5
NAM	Namibia	Sub-Saharan Africa	Rural	Charcoal	1990	0	0.235391	27.6653
NPL	Nepal	Central Asia and Southern Asia	Rural	Charcoal	1990	0	0.170893	162.745
NIC	Nicaragua	Latin America & the Caribbean	Rural	Charcoal	1990	0	6.67085	134.454
NER	Niger	Sub-Saharan Africa	Rural	Charcoal	1990	0	1.08503	150.161
NGA	Nigeria	Sub-Saharan Africa	Rural	Charcoal	1990	0	3.34969	5011.98
NIU	Niue	Oceania excluding Australia and New Zealand	Rural	Charcoal	1990	0	0.0003218	0.141545
PAK	Pakistan	Central Asia and Southern Asia	Rural	Charcoal	1990	0	5.23284	1771.86
PNG	Papua New Guinea	Oceania excluding Australia and New Zealand	Rural	Charcoal	1990	0	0.476624	142.929
PRY	Paraguay	Latin America & the Caribbean	Rural	Charcoal	1990	3.4158	50.8587	167.969
PER	Peru	Latin America & the Caribbean	Rural	Charcoal	1990	0	23.6899	428.247
PHL	Philippines	Eastern Asia and South-eastern Asia	Rural	Charcoal	1990	42.0117	902.633	3070.14
MDA	Moldova, Republic of	Northern America and Europe	Rural	Charcoal	1990	0	3.22945	506.204
RUS	Russian Federation	Northern America and Europe	Rural	Charcoal	1990	0	0	3.14092
RWA	Rwanda	Sub-Saharan Africa	Rural	Charcoal	1990	0	47.9415	394.144
LCA	Saint Lucia	Latin America & the Caribbean	Rural	Charcoal	1990	0	3.32082	44.5381
VCT	Saint Vincent and the Grenadines	Latin America & the Caribbean	Rural	Charcoal	1990	0	0.00188964	0.970078
WSM	Samoa	Oceania excluding Australia and New Zealand	Rural	Charcoal	1990	0	1.43161	50.3009
STP	Sao Tome And Principe	Sub-Saharan Africa	Rural	Charcoal	1990	0	2.83419	38.427
SEN	Senegal	Sub-Saharan Africa	Rural	Charcoal	1990	0	13.2733	750.155
SRB	Serbia	Northern America and Europe	Rural	Charcoal	1990	0	0.424929	321.846
SLE	Sierra Leone	Sub-Saharan Africa	Rural	Charcoal	1990	0	30.1939	640.158
SLB	Solomon Islands	Oceania excluding Australia and New Zealand	Rural	Charcoal	1990	0	0.029611	13.2982
SOM	Somalia	Sub-Saharan Africa	Rural	Charcoal	1990	1.03938	712.373	3634.3
ZAF	South Africa	Sub-Saharan Africa	Rural	Charcoal	1990	0	0	51.1721
SSD	South Sudan	Sub-Saharan Africa	Rural	Charcoal	1990	0	129.519	2580.9
LKA	Sri Lanka	Central Asia and Southern Asia	Rural	Charcoal	1990	0	0.705881	520.626
SDN	Sudan	Western Asia and Northern Africa	Rural	Charcoal	1990	0	0	603.318
SUR	Suriname	Latin America & the Caribbean	Rural	Charcoal	1990	0	0.424807	21.7087
SWZ	Eswatini	Sub-Saharan Africa	Rural	Charcoal	1990	0	0	1.05235
SYR	Syrian Arab Republic	Western Asia and Northern Africa	Rural	Charcoal	1990	0	0	11.3139
TJK	Tajikistan	Central Asia and Southern Asia	Rural	Charcoal	1990	0	0	143.938
THA	Thailand	Eastern Asia and South-eastern Asia	Rural	Charcoal	1990	8034.57	15041.6	22245.8
MKD	North Macedonia	Northern America and Europe	Rural	Charcoal	1990	0	0.867904	76.8478
TLS	Timor-Leste	Eastern Asia and South-eastern Asia	Rural	Charcoal	1990	0	0.589264	129.333
TGO	Togo	Sub-Saharan Africa	Rural	Charcoal	1990	7.67548	398.127	1984.62
TON	Tonga	Oceania excluding Australia and New Zealand	Rural	Charcoal	1990	0	0	0.876134
TUN	Tunisia	Western Asia and Northern Africa	Rural	Charcoal	1990	0	1.38489	820.522
TUR	Turkey	Western Asia and Northern Africa	Rural	Charcoal	1990	0	0	43.5629
TKM	Turkmenistan	Central Asia and Southern Asia	Rural	Charcoal	1990	0	0	2.14483
TUV	Tuvalu	Oceania excluding Australia and New Zealand	Rural	Charcoal	1990	0	0	0.17769
UGA	Uganda	Sub-Saharan Africa	Rural	Charcoal	1990	20.4659	328.369	1153
UKR	Ukraine	Northern America and Europe	Rural	Charcoal	1990	0	40.7177	1695.19
TZA	Tanzania, United Republic of	Sub-Saharan Africa	Rural	Charcoal	1990	0	16.1084	2535.24
UZB	Uzbekistan	Central Asia and Southern Asia	Rural	Charcoal	1990	0	5.27916	540.385
VUT	Vanuatu	Oceania excluding Australia and New Zealand	Rural	Charcoal	1990	0	0.166867	21.605
VEN	Venezuela (Bolivarian Republic of)	Latin America & the Caribbean	Rural	Charcoal	1990	0	0	19.2304
VNM	Viet Nam	Eastern Asia and South-eastern Asia	Rural	Charcoal	1990	4.35137	1515.91	6612.12
YEM	Yemen	Western Asia and Northern Africa	Rural	Charcoal	1990	0	7.91268	1053.73
ZMB	Zambia	Sub-Saharan Africa	Rural	Charcoal	1990	85.3578	297.651	679.662
ZWE	Zimbabwe	Sub-Saharan Africa	Rural	Charcoal	1990	0	2.67554	233.844
AFG	Afghanistan	Central Asia and Southern Asia	Rural	Coal	1990	0	0	623.058
ALB	Albania	Northern America and Europe	Rural	Coal	1990	0	0	7.90675
DZA	Algeria	Western Asia and Northern Africa	Rural	Coal	1990	0	0	36.2574
AGO	Angola	Sub-Saharan Africa	Rural	Coal	1990	0	2.52465	428.612
ARG	Argentina	Latin America & the Caribbean	Rural	Coal	1990	0	0	25.4524
ARM	Armenia	Western Asia and Northern Africa	Rural	Coal	1990	0	0	9.37007
AZE	Azerbaijan	Western Asia and Northern Africa	Rural	Coal	1990	0	0	12.8643
BGD	Bangladesh	Central Asia and Southern Asia	Rural	Coal	1990	0	0	133.709
BLR	Belarus	Northern America and Europe	Rural	Coal	1990	0	0	31.4332
BLZ	Belize	Latin America & the Caribbean	Rural	Coal	1990	0	0.00295593	1.20602
BEN	Benin	Sub-Saharan Africa	Rural	Coal	1990	0	0	1.27205
BTN	Bhutan	Central Asia and Southern Asia	Rural	Coal	1990	0	0	11.8698
BOL	Bolivia (Plurinational State of)	Latin America & the Caribbean	Rural	Coal	1990	0	0.0304573	62.0156
BIH	Bosnia and Herzegovina	Northern America and Europe	Rural	Coal	1990	0	2.0879	127.716
BWA	Botswana	Sub-Saharan Africa	Rural	Coal	1990	0	1.03214	35.2323
BRA	Brazil	Latin America & the Caribbean	Rural	Coal	1990	0	0	21.0417
BFA	Burkina Faso	Sub-Saharan Africa	Rural	Coal	1990	0	0.303753	40.9307
BDI	Burundi	Sub-Saharan Africa	Rural	Coal	1990	0	0	19.6472
CPV	Cabo Verde	Sub-Saharan Africa	Rural	Coal	1990	0	0	0.127999
KHM	Cambodia	Eastern Asia and South-eastern Asia	Rural	Coal	1990	0	0.0757832	12.5042
CMR	Cameroon	Sub-Saharan Africa	Rural	Coal	1990	0	0	2.8984
CAF	Central African Republic	Sub-Saharan Africa	Rural	Coal	1990	0	0	62.2059
TCD	Chad	Sub-Saharan Africa	Rural	Coal	1990	0	53.6812	1751.26
CHN	China	Eastern Asia and South-eastern Asia	Rural	Coal	1990	53050	296156	648951
COL	Colombia	Latin America & the Caribbean	Rural	Coal	1990	0	326.019	1124.56
COM	Comoros	Sub-Saharan Africa	Rural	Coal	1990	0	0	1.05691
COG	Congo	Sub-Saharan Africa	Rural	Coal	1990	0	0.222939	73.0647
COK	Cook Islands	Oceania excluding Australia and New Zealand	Rural	Coal	1990	0	0	0.149502
CRI	Costa Rica	Latin America & the Caribbean	Rural	Coal	1990	0	0	6.10063
CIV	Côte d'Ivoire	Sub-Saharan Africa	Rural	Coal	1990	0	0.223228	676.603
PRK	Democratic Peoples Republic of Korea	Eastern Asia and South-eastern Asia	Rural	Coal	1990	0	672.786	6430.42
COD	Democratic Republic of the Congo	Sub-Saharan Africa	Rural	Coal	1990	0	0.960448	974.585
DJI	Djibouti	Sub-Saharan Africa	Rural	Coal	1990	0	0	0.164661
DMA	Dominica	Latin America & the Caribbean	Rural	Coal	1990	0	0.457749	13.867
DOM	Dominican Republic	Latin America & the Caribbean	Rural	Coal	1990	0	653.172	1270.52
ECU	Ecuador	Latin America & the Caribbean	Rural	Coal	1990	0	0	4.17595
EGY	Egypt	Western Asia and Northern Africa	Rural	Coal	1990	0	34.3977	1419.03
SLV	El Salvador	Latin America & the Caribbean	Rural	Coal	1990	0	0	4.93281
GNQ	Equatorial Guinea	Sub-Saharan Africa	Rural	Coal	1990	0	0.600254	70.5674
ERI	Eritrea	Sub-Saharan Africa	Rural	Coal	1990	0	0	5.55568
ETH	Ethiopia	Sub-Saharan Africa	Rural	Coal	1990	0	0	32.3535
FJI	Fiji	Oceania excluding Australia and New Zealand	Rural	Coal	1990	0	0	5.15779
GAB	Gabon	Sub-Saharan Africa	Rural	Coal	1990	0	0	0.223455
GMB	Gambia	Sub-Saharan Africa	Rural	Coal	1990	0	0	0.605288
GEO	Georgia	Western Asia and Northern Africa	Rural	Coal	1990	0	0	90.6395
GHA	Ghana	Sub-Saharan Africa	Rural	Coal	1990	0	0.0929756	19.246
GRD	Grenada	Latin America & the Caribbean	Rural	Coal	1990	0	0.00448693	3.27036
GTM	Guatemala	Latin America & the Caribbean	Rural	Coal	1990	0	0	22.3603
GIN	Guinea	Sub-Saharan Africa	Rural	Coal	1990	0	0	7.39164
GNB	Guinea-Bissau	Sub-Saharan Africa	Rural	Coal	1990	0	0	2.00257
GUY	Guyana	Latin America & the Caribbean	Rural	Coal	1990	0	1.23526	26.0439
HTI	Haiti	Latin America & the Caribbean	Rural	Coal	1990	0	0.0507559	41.3711
HND	Honduras	Latin America & the Caribbean	Rural	Coal	1990	0	0.206528	109.136
IND	India	Central Asia and Southern Asia	Rural	Coal	1990	1120.6	12960	36641.8
IDN	Indonesia	Eastern Asia and South-eastern Asia	Rural	Coal	1990	0	0	152.394
IRN	Iran (Islamic Republic of)	Central Asia and Southern Asia	Rural	Coal	1990	0	0	387.231
IRQ	Iraq	Western Asia and Northern Africa	Rural	Coal	1990	0	0.052921	561.578
JAM	Jamaica	Latin America & the Caribbean	Rural	Coal	1990	0	0	3.66489
JOR	Jordan	Western Asia and Northern Africa	Rural	Coal	1990	0	0	0.228712
KAZ	Kazakhstan	Central Asia and Southern Asia	Rural	Coal	1990	154.789	2553.86	6119.36
KEN	Kenya	Sub-Saharan Africa	Rural	Coal	1990	0	0	26.5018
KIR	Kiribati	Oceania excluding Australia and New Zealand	Rural	Coal	1990	0	0	2.7943
KGZ	Kyrgyzstan	Central Asia and Southern Asia	Rural	Coal	1990	254.016	1645.33	2549.92
LAO	Lao People's Democratic Republic	Eastern Asia and South-eastern Asia	Rural	Coal	1990	0	0	3.42104
LSO	Lesotho	Sub-Saharan Africa	Rural	Coal	1990	0	0.0275984	16.4087
LBR	Liberia	Sub-Saharan Africa	Rural	Coal	1990	0	0.0280472	43.0717
MDG	Madagascar	Sub-Saharan Africa	Rural	Coal	1990	0	0	13.8344
MWI	Malawi	Sub-Saharan Africa	Rural	Coal	1990	0	0.0834656	13.1083
MYS	Malaysia	Eastern Asia and South-eastern Asia	Rural	Coal	1990	0	0	9.32804
MDV	Maldives	Central Asia and Southern Asia	Rural	Coal	1990	0	0	2.92241
MLI	Mali	Sub-Saharan Africa	Rural	Coal	1990	0	0	8.04871
MHL	Marshall Islands	Oceania excluding Australia and New Zealand	Rural	Coal	1990	0	0	0.078864
MRT	Mauritania	Sub-Saharan Africa	Rural	Coal	1990	0	0.0246367	9.83034
MEX	Mexico	Latin America & the Caribbean	Rural	Coal	1990	0	0	110.325
FSM	Micronesia, Federated States of	Oceania excluding Australia and New Zealand	Rural	Coal	1990	0	0	0.23659
MNG	Mongolia	Eastern Asia and South-eastern Asia	Rural	Coal	1990	0.00938471	39.4205	314.942
MNE	Montenegro	Northern America and Europe	Rural	Coal	1990	0	13.7096	159.65
MAR	Morocco	Western Asia and Northern Africa	Rural	Coal	1990	0	13.7386	821.006
MOZ	Mozambique	Sub-Saharan Africa	Rural	Coal	1990	0	0	67.6673
MMR	Myanmar	Eastern Asia and South-eastern Asia	Rural	Coal	1990	0	1.51855	405.24
NAM	Namibia	Sub-Saharan Africa	Rural	Coal	1990	0	0	14.8716
NPL	Nepal	Central Asia and Southern Asia	Rural	Coal	1990	0	0.170893	209.006
NIC	Nicaragua	Latin America & the Caribbean	Rural	Coal	1990	0	0	0.564008
NER	Niger	Sub-Saharan Africa	Rural	Coal	1990	0	0	3.93491
NGA	Nigeria	Sub-Saharan Africa	Rural	Coal	1990	0	122.264	6755.12
NIU	Niue	Oceania excluding Australia and New Zealand	Rural	Coal	1990	0	0	0.00571436
PAK	Pakistan	Central Asia and Southern Asia	Rural	Coal	1990	0	0	13.4559
PNG	Papua New Guinea	Oceania excluding Australia and New Zealand	Rural	Coal	1990	0	0	2.08981
PRY	Paraguay	Latin America & the Caribbean	Rural	Coal	1990	0	0	2.46511
PER	Peru	Latin America & the Caribbean	Rural	Coal	1990	0	1.28971	192.334
PHL	Philippines	Eastern Asia and South-eastern Asia	Rural	Coal	1990	0	0.328409	66.6753
MDA	Moldova, Republic of	Northern America and Europe	Rural	Coal	1990	0	0	13.9407
RUS	Russian Federation	Northern America and Europe	Rural	Coal	1990	0	0	299.595
RWA	Rwanda	Sub-Saharan Africa	Rural	Coal	1990	0	0	13.2156
LCA	Saint Lucia	Latin America & the Caribbean	Rural	Coal	1990	0	0.00292884	1.42588
VCT	Saint Vincent and the Grenadines	Latin America & the Caribbean	Rural	Coal	1990	0	0.252267	6.85075
WSM	Samoa	Oceania excluding Australia and New Zealand	Rural	Coal	1990	0	0	1.52087
STP	Sao Tome And Principe	Sub-Saharan Africa	Rural	Coal	1990	0	0	1.34786
SEN	Senegal	Sub-Saharan Africa	Rural	Coal	1990	0	0	3.00207
SRB	Serbia	Northern America and Europe	Rural	Coal	1990	0	82.6723	1679.46
SLE	Sierra Leone	Sub-Saharan Africa	Rural	Coal	1990	0	0	30.5984
SLB	Solomon Islands	Oceania excluding Australia and New Zealand	Rural	Coal	1990	0	0.00269191	3.55588
SOM	Somalia	Sub-Saharan Africa	Rural	Coal	1990	0	0	57.2037
ZAF	South Africa	Sub-Saharan Africa	Rural	Coal	1990	87.8734	885.445	2629.16
SSD	South Sudan	Sub-Saharan Africa	Rural	Coal	1990	0	0.15008	153.104
LKA	Sri Lanka	Central Asia and Southern Asia	Rural	Coal	1990	0	0	99.5327
SDN	Sudan	Western Asia and Northern Africa	Rural	Coal	1990	0	0	11.9418
SUR	Suriname	Latin America & the Caribbean	Rural	Coal	1990	0	0	0.517104
SWZ	Eswatini	Sub-Saharan Africa	Rural	Coal	1990	0	5.46453	54.2609
SYR	Syrian Arab Republic	Western Asia and Northern Africa	Rural	Coal	1990	0	0	13.1636
TJK	Tajikistan	Central Asia and Southern Asia	Rural	Coal	1990	0	14.9135	335.646
THA	Thailand	Eastern Asia and South-eastern Asia	Rural	Coal	1990	0	2.79539	437.927
MKD	North Macedonia	Northern America and Europe	Rural	Coal	1990	0	0	7.28807
TLS	Timor-Leste	Eastern Asia and South-eastern Asia	Rural	Coal	1990	0	0	2.75034
TGO	Togo	Sub-Saharan Africa	Rural	Coal	1990	0	0.135215	63.8546
TON	Tonga	Oceania excluding Australia and New Zealand	Rural	Coal	1990	0	0	0.853389
TUN	Tunisia	Western Asia and Northern Africa	Rural	Coal	1990	0	0	56.186
TUR	Turkey	Western Asia and Northern Africa	Rural	Coal	1990	0	56.7566	4645.71
TKM	Turkmenistan	Central Asia and Southern Asia	Rural	Coal	1990	0	0	2.08463
TUV	Tuvalu	Oceania excluding Australia and New Zealand	Rural	Coal	1990	0	0	0.172263
UGA	Uganda	Sub-Saharan Africa	Rural	Coal	1990	0	0.155074	15.1973
UKR	Ukraine	Northern America and Europe	Rural	Coal	1990	0.684331	501.444	5639.65
TZA	Tanzania, United Republic of	Sub-Saharan Africa	Rural	Coal	1990	0	0	5.58114
UZB	Uzbekistan	Central Asia and Southern Asia	Rural	Coal	1990	0	0.119981	61.6702
VUT	Vanuatu	Oceania excluding Australia and New Zealand	Rural	Coal	1990	0	0	6.22216
VEN	Venezuela (Bolivarian Republic of)	Latin America & the Caribbean	Rural	Coal	1990	0	0	18.919
VNM	Viet Nam	Eastern Asia and South-eastern Asia	Rural	Coal	1990	0	4.35137	3122.4
YEM	Yemen	Western Asia and Northern Africa	Rural	Coal	1990	0	0	39.5729
ZMB	Zambia	Sub-Saharan Africa	Rural	Coal	1990	0	0.0486397	10.8491
ZWE	Zimbabwe	Sub-Saharan Africa	Rural	Coal	1990	0	0	73.4762
AFG	Afghanistan	Central Asia and Southern Asia	Rural	Total Polluting	1990	7159.55	9591.64	9655.17
ALB	Albania	Northern America and Europe	Rural	Total Polluting	1990	591.896	1922.82	2086.07
DZA	Algeria	Western Asia and Northern Africa	Rural	Total Polluting	1990	0	619.117	8208.12
AGO	Angola	Sub-Saharan Africa	Rural	Total Polluting	1990	2380.39	6995.18	7650.14
ARG	Argentina	Latin America & the Caribbean	Rural	Total Polluting	1990	797.297	2118.18	3240.21
ARM	Armenia	Western Asia and Northern Africa	Rural	Total Polluting	1990	452.703	1019.24	1149.68
AZE	Azerbaijan	Western Asia and Northern Africa	Rural	Total Polluting	1990	2250.45	3081.47	3331.71
BGD	Bangladesh	Central Asia and Southern Asia	Rural	Total Polluting	1990	74207.5	84398.9	85151.2
BLR	Belarus	Northern America and Europe	Rural	Total Polluting	1990	3.54259	676.733	3014.84
BLZ	Belize	Latin America & the Caribbean	Rural	Total Polluting	1990	39.7671	57.518	72.8765
BEN	Benin	Sub-Saharan Africa	Rural	Total Polluting	1990	3222.43	3260.98	3261.67
BTN	Bhutan	Central Asia and Southern Asia	Rural	Total Polluting	1990	394.486	446.407	449.228
BOL	Bolivia (Plurinational State of)	Latin America & the Caribbean	Rural	Total Polluting	1990	2340.99	2693.41	2910.11
BIH	Bosnia and Herzegovina	Northern America and Europe	Rural	Total Polluting	1990	257.18	1731.18	2681.05
BWA	Botswana	Sub-Saharan Africa	Rural	Total Polluting	1990	519.429	737.838	798.4
BRA	Brazil	Latin America & the Caribbean	Rural	Total Polluting	1990	16217.2	25305	32561.7
BFA	Burkina Faso	Sub-Saharan Africa	Rural	Total Polluting	1990	7169.48	7558.21	7593.83
BDI	Burundi	Sub-Saharan Africa	Rural	Total Polluting	1990	4528.77	5069.72	5075.81
CPV	Cabo Verde	Sub-Saharan Africa	Rural	Total Polluting	1990	36.5337	114.883	174.928
KHM	Cambodia	Eastern Asia and South-eastern Asia	Rural	Total Polluting	1990	7060.79	7545.06	7578.32
CMR	Cameroon	Sub-Saharan Africa	Rural	Total Polluting	1990	6213.68	6999.08	7069.14
CAF	Central African Republic	Sub-Saharan Africa	Rural	Total Polluting	1990	1793.63	1857.19	1857.21
TCD	Chad	Sub-Saharan Africa	Rural	Total Polluting	1990	2662.59	4611.44	4717.15
CHN	China	Eastern Asia and South-eastern Asia	Rural	Total Polluting	1990	156833	604908	849339
COL	Colombia	Latin America & the Caribbean	Rural	Total Polluting	1990	6061.73	7793.81	9202.75
COM	Comoros	Sub-Saharan Africa	Rural	Total Polluting	1990	292.708	296.835	296.885
COG	Congo	Sub-Saharan Africa	Rural	Total Polluting	1990	873.116	1105.8	1114.7
COK	Cook Islands	Oceania excluding Australia and New Zealand	Rural	Total Polluting	1990	0.00069858	4.90815	7.762
CRI	Costa Rica	Latin America & the Caribbean	Rural	Total Polluting	1990	52.1694	335.312	958.964
CIV	Côte d'Ivoire	Sub-Saharan Africa	Rural	Total Polluting	1990	4775.76	7257.45	7440.95
PRK	Democratic Peoples Republic of Korea	Eastern Asia and South-eastern Asia	Rural	Total Polluting	1990	5120.33	8366.53	8445.19
COD	Democratic Republic of the Congo	Sub-Saharan Africa	Rural	Total Polluting	1990	12325.8	23752.1	24011.2
DJI	Djibouti	Sub-Saharan Africa	Rural	Total Polluting	1990	125.704	140.284	141.949
DMA	Dominica	Latin America & the Caribbean	Rural	Total Polluting	1990	0.0823778	21.6669	26.187
DOM	Dominican Republic	Latin America & the Caribbean	Rural	Total Polluting	1990	1984	2541.67	2915.07
ECU	Ecuador	Latin America & the Caribbean	Rural	Total Polluting	1990	875.489	2466.88	3899.35
EGY	Egypt	Western Asia and Northern Africa	Rural	Total Polluting	1990	7981.42	22729.9	30701.3
SLV	El Salvador	Latin America & the Caribbean	Rural	Total Polluting	1990	1008.62	2265.48	2661.96
GNQ	Equatorial Guinea	Sub-Saharan Africa	Rural	Total Polluting	1990	86.1682	266.153	278.54
ERI	Eritrea	Sub-Saharan Africa	Rural	Total Polluting	1990	2400.91	2517.34	2524.74
ETH	Ethiopia	Sub-Saharan Africa	Rural	Total Polluting	1990	33367.4	41349.2	42017.5
FJI	Fiji	Oceania excluding Australia and New Zealand	Rural	Total Polluting	1990	229.499	391.781	425.22
GAB	Gabon	Sub-Saharan Africa	Rural	Total Polluting	1990	139.065	262.552	293.401
GMB	Gambia	Sub-Saharan Africa	Rural	Total Polluting	1990	476.138	547.454	565.434
GEO	Georgia	Western Asia and Northern Africa	Rural	Total Polluting	1990	1076.14	2259.76	2432.61
GHA	Ghana	Sub-Saharan Africa	Rural	Total Polluting	1990	8992.04	9247.73	9297
GRD	Grenada	Latin America & the Caribbean	Rural	Total Polluting	1990	0.17241	9.85362	47.6157
GTM	Guatemala	Latin America & the Caribbean	Rural	Total Polluting	1990	1663.72	3892.4	5159.14
GIN	Guinea	Sub-Saharan Africa	Rural	Total Polluting	1990	4255.91	4344.11	4348.02
GNB	Guinea-Bissau	Sub-Saharan Africa	Rural	Total Polluting	1990	655.484	699.449	700.198
GUY	Guyana	Latin America & the Caribbean	Rural	Total Polluting	1990	264.009	447.612	513.75
HTI	Haiti	Latin America & the Caribbean	Rural	Total Polluting	1990	4658.4	5057.49	5075.59
HND	Honduras	Latin America & the Caribbean	Rural	Total Polluting	1990	1879.77	2831.17	2950.4
IND	India	Central Asia and Southern Asia	Rural	Total Polluting	1990	611098	633698	644630
IDN	Indonesia	Eastern Asia and South-eastern Asia	Rural	Total Polluting	1990	122003	125151	125933
IRN	Iran (Islamic Republic of)	Central Asia and Southern Asia	Rural	Total Polluting	1990	4.17413	3354.77	20580.3
IRQ	Iraq	Western Asia and Northern Africa	Rural	Total Polluting	1990	702.221	3784.94	5228.89
JAM	Jamaica	Latin America & the Caribbean	Rural	Total Polluting	1990	502.081	966.493	1197.68
JOR	Jordan	Western Asia and Northern Africa	Rural	Total Polluting	1990	0	12.8193	194.49
KAZ	Kazakhstan	Central Asia and Southern Asia	Rural	Total Polluting	1990	268.51	3165.91	6676.14
KEN	Kenya	Sub-Saharan Africa	Rural	Total Polluting	1990	18662.3	19381.3	19483.1
KIR	Kiribati	Oceania excluding Australia and New Zealand	Rural	Total Polluting	1990	40.4923	47.0502	47.077
KGZ	Kyrgyzstan	Central Asia and Southern Asia	Rural	Total Polluting	1990	598.978	2196.46	2706.83
LAO	Lao People's Democratic Republic	Eastern Asia and South-eastern Asia	Rural	Total Polluting	1990	3383.39	3590.06	3601.1
LSO	Lesotho	Sub-Saharan Africa	Rural	Total Polluting	1990	1136.3	1322.14	1374.79
LBR	Liberia	Sub-Saharan Africa	Rural	Total Polluting	1990	839.434	934.889	934.908
MDG	Madagascar	Sub-Saharan Africa	Rural	Total Polluting	1990	8223.92	8824.3	8865.35
MWI	Malawi	Sub-Saharan Africa	Rural	Total Polluting	1990	8051.24	8331.04	8346.56
MYS	Malaysia	Eastern Asia and South-eastern Asia	Rural	Total Polluting	1990	0.993934	582.142	5026.37
MDV	Maldives	Central Asia and Southern Asia	Rural	Total Polluting	1990	65.1247	144.967	165.367
MLI	Mali	Sub-Saharan Africa	Rural	Total Polluting	1990	5253.56	6396.52	6490.9
MHL	Marshall Islands	Oceania excluding Australia and New Zealand	Rural	Total Polluting	1990	8.76243	16.2848	16.529
MRT	Mauritania	Sub-Saharan Africa	Rural	Total Polluting	1990	923.316	1143.3	1222.89
MEX	Mexico	Latin America & the Caribbean	Rural	Total Polluting	1990	10098.1	17274.6	22944
FSM	Micronesia, Federated States of	Oceania excluding Australia and New Zealand	Rural	Total Polluting	1990	6.27326	28.1456	71.4603
MNG	Mongolia	Eastern Asia and South-eastern Asia	Rural	Total Polluting	1990	754.517	925.196	938.471
MNE	Montenegro	Northern America and Europe	Rural	Total Polluting	1990	7.84283	163.78	310.438
MAR	Morocco	Western Asia and Northern Africa	Rural	Total Polluting	1990	153.282	3494.62	10811.5
MOZ	Mozambique	Sub-Saharan Africa	Rural	Total Polluting	1990	8423.32	9877.91	9935.74
MMR	Myanmar	Eastern Asia and South-eastern Asia	Rural	Total Polluting	1990	17239.3	30122.3	30371
NAM	Namibia	Sub-Saharan Africa	Rural	Total Polluting	1990	806.815	986.529	1023.36
NPL	Nepal	Central Asia and Southern Asia	Rural	Total Polluting	1990	12044.3	16063.7	16990.3
NIC	Nicaragua	Latin America & the Caribbean	Rural	Total Polluting	1990	1702.43	1881.8	1940.03
NER	Niger	Sub-Saharan Africa	Rural	Total Polluting	1990	6559.99	6772.12	6781.41
NGA	Nigeria	Sub-Saharan Africa	Rural	Total Polluting	1990	57200.9	66507.5	66993.9
NIU	Niue	Oceania excluding Australia and New Zealand	Rural	Total Polluting	1990	0	0.126797	0.956898
PAK	Pakistan	Central Asia and Southern Asia	Rural	Total Polluting	1990	60263.2	73066.6	74738.5
PNG	Papua New Guinea	Oceania excluding Australia and New Zealand	Rural	Total Polluting	1990	3010.36	3607.94	3666.34
PRY	Paraguay	Latin America & the Caribbean	Rural	Total Polluting	1990	1682.98	1952.67	2110.38
PER	Peru	Latin America & the Caribbean	Rural	Total Polluting	1990	5479.4	6646.29	6786.02
PHL	Philippines	Eastern Asia and South-eastern Asia	Rural	Total Polluting	1990	26578.5	30499.2	32341.8
MDA	Moldova, Republic of	Northern America and Europe	Rural	Total Polluting	1990	1013.17	2114.35	2318.47
RUS	Russian Federation	Northern America and Europe	Rural	Total Polluting	1990	0	7.06707	5809.95
RWA	Rwanda	Sub-Saharan Africa	Rural	Total Polluting	1990	6656.28	6832.78	6843.9
LCA	Saint Lucia	Latin America & the Caribbean	Rural	Total Polluting	1990	0.0526947	16.1535	62.0168
VCT	Saint Vincent and the Grenadines	Latin America & the Caribbean	Rural	Total Polluting	1990	0	2.01688	14.1711
WSM	Samoa	Oceania excluding Australia and New Zealand	Rural	Total Polluting	1990	57.076	117.602	128.256
STP	Sao Tome And Principe	Sub-Saharan Africa	Rural	Total Polluting	1990	58.5957	64.1607	64.18
SEN	Senegal	Sub-Saharan Africa	Rural	Total Polluting	1990	4192.78	4531.05	4614.57
SRB	Serbia	Northern America and Europe	Rural	Total Polluting	1990	456.308	3080.85	4659.69
SLE	Sierra Leone	Sub-Saharan Africa	Rural	Total Polluting	1990	1964.09	2864.63	2878.36
SLB	Solomon Islands	Oceania excluding Australia and New Zealand	Rural	Total Polluting	1990	119.316	259.452	269.191
SOM	Somalia	Sub-Saharan Africa	Rural	Total Polluting	1990	4975.32	5200.5	5203.41
ZAF	South Africa	Sub-Saharan Africa	Rural	Total Polluting	1990	11071.7	14462.1	16830.7
SSD	South Sudan	Sub-Saharan Africa	Rural	Total Polluting	1990	3441.33	4982.42	5002.65
LKA	Sri Lanka	Central Asia and Southern Asia	Rural	Total Polluting	1990	5063.2	11736.5	14004.1
SDN	Sudan	Western Asia and Northern Africa	Rural	Total Polluting	1990	9607.95	13619.3	14381.9
SUR	Suriname	Latin America & the Caribbean	Rural	Total Polluting	1990	6.0769	64.3149	133.694
SWZ	Eswatini	Sub-Saharan Africa	Rural	Total Polluting	1990	544.806	653.606	685.837
SYR	Syrian Arab Republic	Western Asia and Northern Africa	Rural	Total Polluting	1990	0	134.909	2263.91
TJK	Tajikistan	Central Asia and Southern Asia	Rural	Total Polluting	1990	2451.82	3385.77	3607.51
THA	Thailand	Eastern Asia and South-eastern Asia	Rural	Total Polluting	1990	19363.8	27846.2	34177.1
MKD	North Macedonia	Northern America and Europe	Rural	Total Polluting	1990	46.1756	445.007	820.549
TLS	Timor-Leste	Eastern Asia and South-eastern Asia	Rural	Total Polluting	1990	500.694	594.764	595.216
TGO	Togo	Sub-Saharan Africa	Rural	Total Polluting	1990	2521.99	2704	2704.3
TON	Tonga	Oceania excluding Australia and New Zealand	Rural	Total Polluting	1990	4.58286	39.4289	71.3833
TUN	Tunisia	Western Asia and Northern Africa	Rural	Total Polluting	1990	12.2546	692.967	2960.17
TUR	Turkey	Western Asia and Northern Africa	Rural	Total Polluting	1990	12.0938	2909.21	18686.7
TKM	Turkmenistan	Central Asia and Southern Asia	Rural	Total Polluting	1990	0	59.4077	589.657
TUV	Tuvalu	Oceania excluding Australia and New Zealand	Rural	Total Polluting	1990	0.00603245	4.82799	5.342
UGA	Uganda	Sub-Saharan Africa	Rural	Total Polluting	1990	15026.8	15496.2	15507.4
UKR	Ukraine	Northern America and Europe	Rural	Total Polluting	1990	24.9695	2789.08	12617.1
TZA	Tanzania, United Republic of	Sub-Saharan Africa	Rural	Total Polluting	1990	19949.2	20644.7	20651.8
UZB	Uzbekistan	Central Asia and Southern Asia	Rural	Total Polluting	1990	319.551	3957.81	10460
VUT	Vanuatu	Oceania excluding Australia and New Zealand	Rural	Total Polluting	1990	47.2726	113.564	119.191
VEN	Venezuela (Bolivarian Republic of)	Latin America & the Caribbean	Rural	Total Polluting	1990	0	457.152	2571.77
VNM	Viet Nam	Eastern Asia and South-eastern Asia	Rural	Total Polluting	1990	53516.4	54346.5	54392.2
YEM	Yemen	Western Asia and Northern Africa	Rural	Total Polluting	1990	852.799	5840.85	9332.11
ZMB	Zambia	Sub-Saharan Africa	Rural	Total Polluting	1990	4681.91	4854.78	4863.97
ZWE	Zimbabwe	Sub-Saharan Africa	Rural	Total Polluting	1990	4575.72	6673.85	7211.39
AFG	Afghanistan	Central Asia and Southern Asia	Rural	Total Clean	1990	0	63.531	2495.62
ALB	Albania	Northern America and Europe	Rural	Total Clean	1990	0	163.256	1494.18
DZA	Algeria	Western Asia and Northern Africa	Rural	Total Clean	1990	4207.74	11796.7	12415.9
AGO	Angola	Sub-Saharan Africa	Rural	Total Clean	1990	0.306018	655.261	5270.06
ARG	Argentina	Latin America & the Caribbean	Rural	Total Clean	1990	1019.96	2141.99	3462.88
ARM	Armenia	Western Asia and Northern Africa	Rural	Total Clean	1990	3.02903	133.472	700.004
AZE	Azerbaijan	Western Asia and Northern Africa	Rural	Total Clean	1990	18.1504	268.391	1099.41
BGD	Bangladesh	Central Asia and Southern Asia	Rural	Total Clean	1990	0	752.311	10943.7
BLR	Belarus	Northern America and Europe	Rural	Total Clean	1990	460.847	2798.95	3472.14
BLZ	Belize	Latin America & the Caribbean	Rural	Total Clean	1990	25.6545	41.013	58.7639
BEN	Benin	Sub-Saharan Africa	Rural	Total Clean	1990	0	0.68495	39.2403
BTN	Bhutan	Central Asia and Southern Asia	Rural	Total Clean	1990	0	2.82115	54.7419
BOL	Bolivia (Plurinational State of)	Latin America & the Caribbean	Rural	Total Clean	1990	135.619	352.315	704.742
BIH	Bosnia and Herzegovina	Northern America and Europe	Rural	Total Clean	1990	30.5036	980.376	2454.37
BWA	Botswana	Sub-Saharan Africa	Rural	Total Clean	1990	1.71124	62.2726	280.682
BRA	Brazil	Latin America & the Caribbean	Rural	Total Clean	1990	6386.42	13643.1	22730.9
BFA	Burkina Faso	Sub-Saharan Africa	Rural	Total Clean	1990	0	35.615	424.343
BDI	Burundi	Sub-Saharan Africa	Rural	Total Clean	1990	0	6.09097	547.037
CPV	Cabo Verde	Sub-Saharan Africa	Rural	Total Clean	1990	16.1156	76.1606	154.51
KHM	Cambodia	Eastern Asia and South-eastern Asia	Rural	Total Clean	1990	0	33.2688	517.539
CMR	Cameroon	Sub-Saharan Africa	Rural	Total Clean	1990	0.141386	70.1979	855.602
CAF	Central African Republic	Sub-Saharan Africa	Rural	Total Clean	1990	0	0.0185721	63.582
TCD	Chad	Sub-Saharan Africa	Rural	Total Clean	1990	0	105.711	2054.56
CHN	China	Eastern Asia and South-eastern Asia	Rural	Total Clean	1990	13084	257515	705590
COL	Colombia	Latin America & the Caribbean	Rural	Total Clean	1990	1256.63	2665.57	4397.65
COM	Comoros	Sub-Saharan Africa	Rural	Total Clean	1990	0	0.0504705	4.17739
COG	Congo	Sub-Saharan Africa	Rural	Total Clean	1990	0	8.90085	241.58
COK	Cook Islands	Oceania excluding Australia and New Zealand	Rural	Total Clean	1990	0	2.85385	7.7613
CRI	Costa Rica	Latin America & the Caribbean	Rural	Total Clean	1990	588.929	1212.58	1495.72
CIV	Côte d'Ivoire	Sub-Saharan Africa	Rural	Total Clean	1990	0	183.494	2665.19
PRK	Democratic Peoples Republic of Korea	Eastern Asia and South-eastern Asia	Rural	Total Clean	1990	0	78.667	3324.87
COD	Democratic Republic of the Congo	Sub-Saharan Africa	Rural	Total Clean	1990	0	259.081	11685.4
DJI	Djibouti	Sub-Saharan Africa	Rural	Total Clean	1990	0	1.66506	16.2445
DMA	Dominica	Latin America & the Caribbean	Rural	Total Clean	1990	0	4.52014	26.1046
DOM	Dominican Republic	Latin America & the Caribbean	Rural	Total Clean	1990	301.336	674.738	1232.41
ECU	Ecuador	Latin America & the Caribbean	Rural	Total Clean	1990	689.599	2122.07	3713.46
EGY	Egypt	Western Asia and Northern Africa	Rural	Total Clean	1990	1749.34	9720.75	24469.2
SLV	El Salvador	Latin America & the Caribbean	Rural	Total Clean	1990	3.70527	400.183	1657.05
GNQ	Equatorial Guinea	Sub-Saharan Africa	Rural	Total Clean	1990	0	12.3867	192.372
ERI	Eritrea	Sub-Saharan Africa	Rural	Total Clean	1990	0	7.39747	123.823
ETH	Ethiopia	Sub-Saharan Africa	Rural	Total Clean	1990	0	668.288	8650.03
FJI	Fiji	Oceania excluding Australia and New Zealand	Rural	Total Clean	1990	0.21676	33.6563	195.938
GAB	Gabon	Sub-Saharan Africa	Rural	Total Clean	1990	0.425829	31.2749	154.762
GMB	Gambia	Sub-Saharan Africa	Rural	Total Clean	1990	0.124423	18.1035	89.42
GEO	Georgia	Western Asia and Northern Africa	Rural	Total Clean	1990	0	172.849	1356.47
GHA	Ghana	Sub-Saharan Africa	Rural	Total Clean	1990	0.557854	49.8349	305.523
GRD	Grenada	Latin America & the Caribbean	Rural	Total Clean	1990	16.4833	54.2454	63.9266
GTM	Guatemala	Latin America & the Caribbean	Rural	Total Clean	1990	214.653	1481.39	3710.07
GIN	Guinea	Sub-Saharan Africa	Rural	Total Clean	1990	0	3.91322	92.1107
[truncated: 125,921 more rows]
