# Supplementary material for: What fuels the fire? Cooking fuel estimates at global, regional and country level for 1990-2030
Source: Research Square preprint supplement (doi:10.21203/rs.3.rs-251806/v1), 2021-02-17
Supplement: Supplementary file 2 [file 1594a432605ad81e83db2ca3.xlsx]

## Sheet: Readme
	Estimates of global fuel use and fuel use in each SDG region from "What fuels the fire? Cooking fuel estimates at global, regional and country level for 1990-2030".
	Oliver Stoner, Jessica Lewis, Itzel Lucio Martínez, Sophie Gumy, Theo Economou and Heather Adair-Rohani
	Contact: householdenergy@who.int
	Copyright WHO 2021 under CC BY 3.0 IGO
	Clean (%)
	Percentage of the population mainly using clean fuels for cooking (assuming 100% clean fuel use in high-income countries).
	Clean (Population)
	Number of people mainly using clean fuels for cooking (assuming 100% clean fuel use in high-income countries).
	Polluting (%)
	Percentage of the population mainly using polluting fuels for cooking (assuming 0% polluting fuel use in high-income countries).
	Polluting (Population)
	Number of people mainly polluting clean fuels for cooking (assuming 0% polluting fuel use in high-income countries).
	Fuels (%)
	Percentage of the population mainly using each fuel type for cooking (excluding high-income countries).
	Population
	Number of people mainly using each fuel type for cooking (excluding high-income countries).
	Estimate Types
	Median: Central estimates of fuel use (50% quantiles of posterior predictive distributions).
	Lower95 and Upper95: Lower and upper bounds, respectively, of 95% credible/confidence intervals (2.5% and 97.5% quantiles of posterior predictive distributions).
	Aggregate Categories
	Biomass (unprocessed/raw biomass) includes wood, crop residues, and dung.
	Gas (gaseous fuels) includes liquid petroleum gas (LPG), natural gas, and biogas.
	Data Sources
	Household Surveys: World Health Organization Household Energy Database (March 2020 version)
	Statistical Model: https://rss.onlinelibrary.wiley.com/doi/full/10.1111/rssc.12428
	Population Estimates: United Nations World Urbanization Prospects - Population Division (2018 revision)
	Income Classification: World Bank Income Country and Lending Groups - Country Classification (2019 fiscal year)
	Regional Classification
	AUS	Australia	Australia and New Zealand
	NZL	New Zealand	Australia and New Zealand
	AFG	Afghanistan	Central Asia and Southern Asia
	BGD	Bangladesh	Central Asia and Southern Asia
	BTN	Bhutan	Central Asia and Southern Asia
	IND	India	Central Asia and Southern Asia
	IRN	Iran (Islamic Republic of)	Central Asia and Southern Asia
	KAZ	Kazakhstan	Central Asia and Southern Asia
	KGZ	Kyrgyzstan	Central Asia and Southern Asia
	MDV	Maldives	Central Asia and Southern Asia
	NPL	Nepal	Central Asia and Southern Asia
	PAK	Pakistan	Central Asia and Southern Asia
	LKA	Sri Lanka	Central Asia and Southern Asia
	TJK	Tajikistan	Central Asia and Southern Asia
	TKM	Turkmenistan	Central Asia and Southern Asia
	UZB	Uzbekistan	Central Asia and Southern Asia
	BRN	Brunei Darussalam	Eastern Asia and South-eastern Asia
	KHM	Cambodia	Eastern Asia and South-eastern Asia
	CHN	China	Eastern Asia and South-eastern Asia
	PRK	Democratic Peoples Republic of Korea	Eastern Asia and South-eastern Asia
	IDN	Indonesia	Eastern Asia and South-eastern Asia
	JPN	Japan	Eastern Asia and South-eastern Asia
	LAO	Lao People's Democratic Republic	Eastern Asia and South-eastern Asia
	MYS	Malaysia	Eastern Asia and South-eastern Asia
	MNG	Mongolia	Eastern Asia and South-eastern Asia
	MMR	Myanmar	Eastern Asia and South-eastern Asia
	PHL	Philippines	Eastern Asia and South-eastern Asia
	KOR	Korea, Republic of	Eastern Asia and South-eastern Asia
	SGP	Singapore	Eastern Asia and South-eastern Asia
	THA	Thailand	Eastern Asia and South-eastern Asia
	TLS	Timor-Leste	Eastern Asia and South-eastern Asia
	VNM	Viet Nam	Eastern Asia and South-eastern Asia
	ATG	Antigua And Barbuda	Latin America & the Caribbean
	ARG	Argentina	Latin America & the Caribbean
	BHS	Bahamas	Latin America & the Caribbean
	BRB	Barbados	Latin America & the Caribbean
	BLZ	Belize	Latin America & the Caribbean
	BOL	Bolivia (Plurinational State of)	Latin America & the Caribbean
	BRA	Brazil	Latin America & the Caribbean
	CHL	Chile	Latin America & the Caribbean
	COL	Colombia	Latin America & the Caribbean
	CRI	Costa Rica	Latin America & the Caribbean
	CUB	Cuba	Latin America & the Caribbean
	DMA	Dominica	Latin America & the Caribbean
	DOM	Dominican Republic	Latin America & the Caribbean
	ECU	Ecuador	Latin America & the Caribbean
	SLV	El Salvador	Latin America & the Caribbean
	GRD	Grenada	Latin America & the Caribbean
	GTM	Guatemala	Latin America & the Caribbean
	GUY	Guyana	Latin America & the Caribbean
	HTI	Haiti	Latin America & the Caribbean
	HND	Honduras	Latin America & the Caribbean
	JAM	Jamaica	Latin America & the Caribbean
	MEX	Mexico	Latin America & the Caribbean
	NIC	Nicaragua	Latin America & the Caribbean
	PAN	Panama	Latin America & the Caribbean
	PRY	Paraguay	Latin America & the Caribbean
	PER	Peru	Latin America & the Caribbean
	KNA	Saint Kitts and Nevis	Latin America & the Caribbean
	LCA	Saint Lucia	Latin America & the Caribbean
	VCT	Saint Vincent and the Grenadines	Latin America & the Caribbean
	SUR	Suriname	Latin America & the Caribbean
	TTO	Trinidad and Tobago	Latin America & the Caribbean
	URY	Uruguay	Latin America & the Caribbean
	VEN	Venezuela (Bolivarian Republic of)	Latin America & the Caribbean
	ALB	Albania	Northern America and Europe
	AND	Andorra	Northern America and Europe
	AUT	Austria	Northern America and Europe
	BLR	Belarus	Northern America and Europe
	BEL	Belgium	Northern America and Europe
	BIH	Bosnia and Herzegovina	Northern America and Europe
	BGR	Bulgaria	Northern America and Europe
	CAN	Canada	Northern America and Europe
	HRV	Croatia	Northern America and Europe
	CZE	Czechia	Northern America and Europe
	DNK	Denmark	Northern America and Europe
	EST	Estonia	Northern America and Europe
	FIN	Finland	Northern America and Europe
	FRA	France	Northern America and Europe
	DEU	Germany	Northern America and Europe
	GRC	Greece	Northern America and Europe
	HUN	Hungary	Northern America and Europe
	ISL	Iceland	Northern America and Europe
	IRL	Ireland	Northern America and Europe
	ITA	Italy	Northern America and Europe
	LVA	Latvia	Northern America and Europe
	LTU	Lithuania	Northern America and Europe
	LUX	Luxembourg	Northern America and Europe
	MLT	Malta	Northern America and Europe
	MCO	Monaco	Northern America and Europe
	MNE	Montenegro	Northern America and Europe
	NLD	Netherlands	Northern America and Europe
	NOR	Norway	Northern America and Europe
	POL	Poland	Northern America and Europe
	PRT	Portugal	Northern America and Europe
	MDA	Moldova, Republic of	Northern America and Europe
	ROU	Romania	Northern America and Europe
	RUS	Russian Federation	Northern America and Europe
	SMR	San Marino	Northern America and Europe
	SRB	Serbia	Northern America and Europe
	SVK	Slovakia	Northern America and Europe
	SVN	Slovenia	Northern America and Europe
	ESP	Spain	Northern America and Europe
	SWE	Sweden	Northern America and Europe
	CHE	Switzerland	Northern America and Europe
	MKD	North Macedonia	Northern America and Europe
	UKR	Ukraine	Northern America and Europe
	GBR	United Kingdom of Great Britain and Northern Ireland	Northern America and Europe
	USA	United States of America	Northern America and Europe
	COK	Cook Islands	Oceania excluding Australia and New Zealand
	FJI	Fiji	Oceania excluding Australia and New Zealand
	KIR	Kiribati	Oceania excluding Australia and New Zealand
	MHL	Marshall Islands	Oceania excluding Australia and New Zealand
	FSM	Micronesia, Federated States of	Oceania excluding Australia and New Zealand
	NRU	Nauru	Oceania excluding Australia and New Zealand
	NIU	Niue	Oceania excluding Australia and New Zealand
	PLW	Palau	Oceania excluding Australia and New Zealand
	PNG	Papua New Guinea	Oceania excluding Australia and New Zealand
	WSM	Samoa	Oceania excluding Australia and New Zealand
	SLB	Solomon Islands	Oceania excluding Australia and New Zealand
	TON	Tonga	Oceania excluding Australia and New Zealand
	TUV	Tuvalu	Oceania excluding Australia and New Zealand
	VUT	Vanuatu	Oceania excluding Australia and New Zealand
	AGO	Angola	Sub-Saharan Africa
	BEN	Benin	Sub-Saharan Africa
	BWA	Botswana	Sub-Saharan Africa
	BFA	Burkina Faso	Sub-Saharan Africa
	BDI	Burundi	Sub-Saharan Africa
	CPV	Cabo Verde	Sub-Saharan Africa
	CMR	Cameroon	Sub-Saharan Africa
	CAF	Central African Republic	Sub-Saharan Africa
	TCD	Chad	Sub-Saharan Africa
	COM	Comoros	Sub-Saharan Africa
	COG	Congo	Sub-Saharan Africa
	CIV	Côte d'Ivoire	Sub-Saharan Africa
	COD	Democratic Republic of the Congo	Sub-Saharan Africa
	DJI	Djibouti	Sub-Saharan Africa
	GNQ	Equatorial Guinea	Sub-Saharan Africa
	ERI	Eritrea	Sub-Saharan Africa
	ETH	Ethiopia	Sub-Saharan Africa
	GAB	Gabon	Sub-Saharan Africa
	GMB	Gambia	Sub-Saharan Africa
	GHA	Ghana	Sub-Saharan Africa
	GIN	Guinea	Sub-Saharan Africa
	GNB	Guinea-Bissau	Sub-Saharan Africa
	KEN	Kenya	Sub-Saharan Africa
	LSO	Lesotho	Sub-Saharan Africa
	LBR	Liberia	Sub-Saharan Africa
	MDG	Madagascar	Sub-Saharan Africa
	MWI	Malawi	Sub-Saharan Africa
	MLI	Mali	Sub-Saharan Africa
	MRT	Mauritania	Sub-Saharan Africa
	MUS	Mauritius	Sub-Saharan Africa
	MOZ	Mozambique	Sub-Saharan Africa
	NAM	Namibia	Sub-Saharan Africa
	NER	Niger	Sub-Saharan Africa
	NGA	Nigeria	Sub-Saharan Africa
	RWA	Rwanda	Sub-Saharan Africa
	STP	Sao Tome And Principe	Sub-Saharan Africa
	SEN	Senegal	Sub-Saharan Africa
	SYC	Seychelles	Sub-Saharan Africa
	SLE	Sierra Leone	Sub-Saharan Africa
	SOM	Somalia	Sub-Saharan Africa
	ZAF	South Africa	Sub-Saharan Africa
	SSD	South Sudan	Sub-Saharan Africa
	SWZ	Eswatini	Sub-Saharan Africa
	TGO	Togo	Sub-Saharan Africa
	UGA	Uganda	Sub-Saharan Africa
	TZA	Tanzania, United Republic of	Sub-Saharan Africa
	ZMB	Zambia	Sub-Saharan Africa
	ZWE	Zimbabwe	Sub-Saharan Africa
	DZA	Algeria	Western Asia and Northern Africa
	ARM	Armenia	Western Asia and Northern Africa
	AZE	Azerbaijan	Western Asia and Northern Africa
	BHR	Bahrain	Western Asia and Northern Africa
	CYP	Cyprus	Western Asia and Northern Africa
	EGY	Egypt	Western Asia and Northern Africa
	GEO	Georgia	Western Asia and Northern Africa
	IRQ	Iraq	Western Asia and Northern Africa
	ISR	Israel	Western Asia and Northern Africa
	JOR	Jordan	Western Asia and Northern Africa
	KWT	Kuwait	Western Asia and Northern Africa
	LBN	Lebanon	Western Asia and Northern Africa
	LBY	Libya	Western Asia and Northern Africa
	MAR	Morocco	Western Asia and Northern Africa
	OMN	Oman	Western Asia and Northern Africa
	QAT	Qatar	Western Asia and Northern Africa
	SAU	Saudi Arabia	Western Asia and Northern Africa
	SDN	Sudan	Western Asia and Northern Africa
	SYR	Syrian Arab Republic	Western Asia and Northern Africa
	TUN	Tunisia	Western Asia and Northern Africa
	TUR	Turkey	Western Asia and Northern Africa
	ARE	United Arab Emirates	Western Asia and Northern Africa
	YEM	Yemen	Western Asia and Northern Africa

## Sheet: Clean (%)
region	area	year	percent_lower95	percent_median	percent_upper95
Australia and New Zealand	Urban	1990	1	1	1
Central Asia and Southern Asia	Urban	1990	0.337604	0.422454	0.510928
Eastern Asia and South-eastern Asia	Urban	1990	0.394155	0.644043	0.799494
Latin America & the Caribbean	Urban	1990	0.818951	0.876214	0.914208
Northern America and Europe	Urban	1990	0.962657	0.987068	0.995331
Oceania excluding Australia and New Zealand	Urban	1990	0.16287	0.347389	0.6574
Sub-Saharan Africa	Urban	1990	0.199224	0.250988	0.331671
Western Asia and Northern Africa	Urban	1990	0.744997	0.871391	0.932159
Australia and New Zealand	Urban	1991	1	1	1
Central Asia and Southern Asia	Urban	1991	0.351692	0.434105	0.520496
Eastern Asia and South-eastern Asia	Urban	1991	0.401613	0.642275	0.796574
Latin America & the Caribbean	Urban	1991	0.832421	0.884081	0.917668
Northern America and Europe	Urban	1991	0.966039	0.987603	0.995407
Oceania excluding Australia and New Zealand	Urban	1991	0.176171	0.354427	0.649521
Sub-Saharan Africa	Urban	1991	0.200862	0.250577	0.324381
Western Asia and Northern Africa	Urban	1991	0.757938	0.878079	0.933584
Australia and New Zealand	Urban	1992	1	1	1
Central Asia and Southern Asia	Urban	1992	0.369391	0.448663	0.532922
Eastern Asia and South-eastern Asia	Urban	1992	0.418991	0.639811	0.789952
Latin America & the Caribbean	Urban	1992	0.844093	0.890721	0.921834
Northern America and Europe	Urban	1992	0.968896	0.988324	0.99542
Oceania excluding Australia and New Zealand	Urban	1992	0.184197	0.358309	0.640651
Sub-Saharan Africa	Urban	1992	0.203235	0.249159	0.316212
Western Asia and Northern Africa	Urban	1992	0.776769	0.883905	0.933078
Australia and New Zealand	Urban	1993	1	1	1
Central Asia and Southern Asia	Urban	1993	0.385105	0.463184	0.542902
Eastern Asia and South-eastern Asia	Urban	1993	0.433303	0.640594	0.784017
Latin America & the Caribbean	Urban	1993	0.851385	0.897375	0.924399
Northern America and Europe	Urban	1993	0.971091	0.988931	0.995427
Oceania excluding Australia and New Zealand	Urban	1993	0.194848	0.369267	0.636451
Sub-Saharan Africa	Urban	1993	0.206862	0.248526	0.308337
Western Asia and Northern Africa	Urban	1993	0.798289	0.890121	0.933769
Australia and New Zealand	Urban	1994	1	1	1
Central Asia and Southern Asia	Urban	1994	0.399596	0.47715	0.556645
Eastern Asia and South-eastern Asia	Urban	1994	0.45109	0.640298	0.782457
Latin America & the Caribbean	Urban	1994	0.861337	0.90265	0.928093
Northern America and Europe	Urban	1994	0.973497	0.989634	0.995864
Oceania excluding Australia and New Zealand	Urban	1994	0.200659	0.373864	0.62787
Sub-Saharan Africa	Urban	1994	0.208822	0.247759	0.300042
Western Asia and Northern Africa	Urban	1994	0.812164	0.896473	0.936839
Australia and New Zealand	Urban	1995	1	1	1
Central Asia and Southern Asia	Urban	1995	0.413144	0.492445	0.570352
Eastern Asia and South-eastern Asia	Urban	1995	0.471242	0.642791	0.778242
Latin America & the Caribbean	Urban	1995	0.864234	0.907493	0.931795
Northern America and Europe	Urban	1995	0.976073	0.990187	0.995799
Oceania excluding Australia and New Zealand	Urban	1995	0.208901	0.380816	0.627241
Sub-Saharan Africa	Urban	1995	0.209504	0.246931	0.296568
Western Asia and Northern Africa	Urban	1995	0.826092	0.901452	0.938218
Australia and New Zealand	Urban	1996	1	1	1
Central Asia and Southern Asia	Urban	1996	0.430744	0.50697	0.586258
Eastern Asia and South-eastern Asia	Urban	1996	0.480881	0.642169	0.77162
Latin America & the Caribbean	Urban	1996	0.876397	0.913062	0.934907
Northern America and Europe	Urban	1996	0.977247	0.990706	0.996009
Oceania excluding Australia and New Zealand	Urban	1996	0.21928	0.387592	0.619674
Sub-Saharan Africa	Urban	1996	0.212901	0.247299	0.291907
Western Asia and Northern Africa	Urban	1996	0.83862	0.907642	0.939621
Australia and New Zealand	Urban	1997	1	1	1
Central Asia and Southern Asia	Urban	1997	0.447427	0.522616	0.601617
Eastern Asia and South-eastern Asia	Urban	1997	0.495545	0.645052	0.775281
Latin America & the Caribbean	Urban	1997	0.880235	0.917659	0.938008
Northern America and Europe	Urban	1997	0.97989	0.991317	0.996118
Oceania excluding Australia and New Zealand	Urban	1997	0.226735	0.393604	0.618933
Sub-Saharan Africa	Urban	1997	0.213588	0.246186	0.287311
Western Asia and Northern Africa	Urban	1997	0.851956	0.913236	0.942507
Australia and New Zealand	Urban	1998	1	1	1
Central Asia and Southern Asia	Urban	1998	0.460115	0.540724	0.615764
Eastern Asia and South-eastern Asia	Urban	1998	0.510787	0.647677	0.766838
Latin America & the Caribbean	Urban	1998	0.884964	0.921231	0.941234
Northern America and Europe	Urban	1998	0.981507	0.991854	0.996283
Oceania excluding Australia and New Zealand	Urban	1998	0.23592	0.396965	0.615116
Sub-Saharan Africa	Urban	1998	0.21532	0.246653	0.283428
Western Asia and Northern Africa	Urban	1998	0.86694	0.919007	0.94566
Australia and New Zealand	Urban	1999	1	1	1
Central Asia and Southern Asia	Urban	1999	0.480789	0.557966	0.634099
Eastern Asia and South-eastern Asia	Urban	1999	0.524264	0.650496	0.7704
Latin America & the Caribbean	Urban	1999	0.890464	0.926274	0.944296
Northern America and Europe	Urban	1999	0.982159	0.992384	0.996264
Oceania excluding Australia and New Zealand	Urban	1999	0.239717	0.399439	0.612045
Sub-Saharan Africa	Urban	1999	0.216867	0.246946	0.280557
Western Asia and Northern Africa	Urban	1999	0.875587	0.92432	0.948124
Australia and New Zealand	Urban	2000	1	1	1
Central Asia and Southern Asia	Urban	2000	0.498843	0.576044	0.650467
Eastern Asia and South-eastern Asia	Urban	2000	0.533956	0.654089	0.769574
Latin America & the Caribbean	Urban	2000	0.893742	0.929703	0.946793
Northern America and Europe	Urban	2000	0.983033	0.992807	0.99638
Oceania excluding Australia and New Zealand	Urban	2000	0.248366	0.408472	0.604967
Sub-Saharan Africa	Urban	2000	0.218886	0.247511	0.278682
Western Asia and Northern Africa	Urban	2000	0.889249	0.929195	0.950702
Australia and New Zealand	Urban	2001	1	1	1
Central Asia and Southern Asia	Urban	2001	0.512936	0.592601	0.666135
Eastern Asia and South-eastern Asia	Urban	2001	0.541627	0.662136	0.765462
Latin America & the Caribbean	Urban	2001	0.898456	0.932922	0.949236
Northern America and Europe	Urban	2001	0.984003	0.993192	0.996522
Oceania excluding Australia and New Zealand	Urban	2001	0.255203	0.411615	0.610821
Sub-Saharan Africa	Urban	2001	0.220354	0.248296	0.27762
Western Asia and Northern Africa	Urban	2001	0.899137	0.93442	0.953163
Australia and New Zealand	Urban	2002	1	1	1
Central Asia and Southern Asia	Urban	2002	0.531203	0.608703	0.683656
Eastern Asia and South-eastern Asia	Urban	2002	0.55552	0.669556	0.772336
Latin America & the Caribbean	Urban	2002	0.901713	0.935848	0.951923
Northern America and Europe	Urban	2002	0.983184	0.99346	0.996545
Oceania excluding Australia and New Zealand	Urban	2002	0.260723	0.415012	0.601958
Sub-Saharan Africa	Urban	2002	0.222623	0.249166	0.276962
Western Asia and Northern Africa	Urban	2002	0.908004	0.938445	0.956284
Australia and New Zealand	Urban	2003	1	1	1
Central Asia and Southern Asia	Urban	2003	0.548493	0.625072	0.701396
Eastern Asia and South-eastern Asia	Urban	2003	0.560932	0.676718	0.784086
Latin America & the Caribbean	Urban	2003	0.904866	0.937552	0.953471
Northern America and Europe	Urban	2003	0.981976	0.993702	0.996709
Oceania excluding Australia and New Zealand	Urban	2003	0.268397	0.419414	0.595805
Sub-Saharan Africa	Urban	2003	0.223455	0.250294	0.275934
Western Asia and Northern Africa	Urban	2003	0.914137	0.942568	0.959207
Australia and New Zealand	Urban	2004	1	1	1
Central Asia and Southern Asia	Urban	2004	0.560302	0.640403	0.715397
Eastern Asia and South-eastern Asia	Urban	2004	0.572796	0.687012	0.793374
Latin America & the Caribbean	Urban	2004	0.908719	0.940158	0.955308
Northern America and Europe	Urban	2004	0.981611	0.993918	0.996732
Oceania excluding Australia and New Zealand	Urban	2004	0.277972	0.42163	0.586491
Sub-Saharan Africa	Urban	2004	0.227056	0.251834	0.27701
Western Asia and Northern Africa	Urban	2004	0.921021	0.946454	0.961388
Australia and New Zealand	Urban	2005	1	1	1
Central Asia and Southern Asia	Urban	2005	0.569935	0.653674	0.730706
Eastern Asia and South-eastern Asia	Urban	2005	0.582833	0.698004	0.797011
Latin America & the Caribbean	Urban	2005	0.909895	0.941548	0.956479
Northern America and Europe	Urban	2005	0.980992	0.994089	0.996786
Oceania excluding Australia and New Zealand	Urban	2005	0.285327	0.426692	0.583189
Sub-Saharan Africa	Urban	2005	0.228389	0.25338	0.277221
Western Asia and Northern Africa	Urban	2005	0.92838	0.950379	0.96483
Australia and New Zealand	Urban	2006	1	1	1
Central Asia and Southern Asia	Urban	2006	0.590421	0.667492	0.744376
Eastern Asia and South-eastern Asia	Urban	2006	0.596102	0.709874	0.811468
Latin America & the Caribbean	Urban	2006	0.910705	0.943167	0.957498
Northern America and Europe	Urban	2006	0.978601	0.993984	0.996882
Oceania excluding Australia and New Zealand	Urban	2006	0.29739	0.428383	0.585286
Sub-Saharan Africa	Urban	2006	0.230906	0.254838	0.27716
Western Asia and Northern Africa	Urban	2006	0.933528	0.953994	0.967111
Australia and New Zealand	Urban	2007	1	1	1
Central Asia and Southern Asia	Urban	2007	0.601985	0.683854	0.759778
Eastern Asia and South-eastern Asia	Urban	2007	0.608072	0.725438	0.822803
Latin America & the Caribbean	Urban	2007	0.913424	0.944304	0.958215
Northern America and Europe	Urban	2007	0.976965	0.993986	0.996904
Oceania excluding Australia and New Zealand	Urban	2007	0.305262	0.4298	0.575292
Sub-Saharan Africa	Urban	2007	0.234364	0.256687	0.278681
Western Asia and Northern Africa	Urban	2007	0.937615	0.95749	0.970095
Australia and New Zealand	Urban	2008	1	1	1
Central Asia and Southern Asia	Urban	2008	0.613813	0.697559	0.771855
Eastern Asia and South-eastern Asia	Urban	2008	0.620001	0.739385	0.83605
Latin America & the Caribbean	Urban	2008	0.915503	0.945507	0.959137
Northern America and Europe	Urban	2008	0.974958	0.993738	0.996964
Oceania excluding Australia and New Zealand	Urban	2008	0.303378	0.428465	0.576019
Sub-Saharan Africa	Urban	2008	0.235875	0.258096	0.278999
Western Asia and Northern Africa	Urban	2008	0.941096	0.960555	0.972601
Australia and New Zealand	Urban	2009	1	1	1
Central Asia and Southern Asia	Urban	2009	0.622743	0.710046	0.78489
Eastern Asia and South-eastern Asia	Urban	2009	0.634676	0.754438	0.846456
Latin America & the Caribbean	Urban	2009	0.917506	0.945811	0.959515
Northern America and Europe	Urban	2009	0.971862	0.993357	0.996955
Oceania excluding Australia and New Zealand	Urban	2009	0.306906	0.431726	0.575792
Sub-Saharan Africa	Urban	2009	0.237125	0.259534	0.280765
Western Asia and Northern Africa	Urban	2009	0.945015	0.963111	0.974634
Australia and New Zealand	Urban	2010	1	1	1
Central Asia and Southern Asia	Urban	2010	0.63838	0.722614	0.795406
Eastern Asia and South-eastern Asia	Urban	2010	0.65018	0.768435	0.862419
Latin America & the Caribbean	Urban	2010	0.918991	0.946394	0.959703
Northern America and Europe	Urban	2010	0.967779	0.993028	0.996974
Oceania excluding Australia and New Zealand	Urban	2010	0.305972	0.431607	0.589506
Sub-Saharan Africa	Urban	2010	0.240583	0.261941	0.283247
Western Asia and Northern Africa	Urban	2010	0.947296	0.96543	0.976717
Australia and New Zealand	Urban	2011	1	1	1
Central Asia and Southern Asia	Urban	2011	0.648	0.734985	0.811864
Eastern Asia and South-eastern Asia	Urban	2011	0.654374	0.781834	0.87052
Latin America & the Caribbean	Urban	2011	0.918602	0.946675	0.960227
Northern America and Europe	Urban	2011	0.965019	0.992423	0.996923
Oceania excluding Australia and New Zealand	Urban	2011	0.297373	0.429741	0.585314
Sub-Saharan Africa	Urban	2011	0.242503	0.263976	0.284746
Western Asia and Northern Africa	Urban	2011	0.949189	0.967077	0.978446
Australia and New Zealand	Urban	2012	1	1	1
Central Asia and Southern Asia	Urban	2012	0.657225	0.747137	0.822667
Eastern Asia and South-eastern Asia	Urban	2012	0.655512	0.792579	0.886477
Latin America & the Caribbean	Urban	2012	0.920437	0.946539	0.960252
Northern America and Europe	Urban	2012	0.958633	0.991705	0.997047
Oceania excluding Australia and New Zealand	Urban	2012	0.288401	0.429959	0.589924
Sub-Saharan Africa	Urban	2012	0.24584	0.267273	0.288305
Western Asia and Northern Africa	Urban	2012	0.950633	0.968709	0.979936
Australia and New Zealand	Urban	2013	1	1	1
Central Asia and Southern Asia	Urban	2013	0.668452	0.759391	0.832974
Eastern Asia and South-eastern Asia	Urban	2013	0.66712	0.803465	0.897183
Latin America & the Caribbean	Urban	2013	0.92055	0.946615	0.960514
Northern America and Europe	Urban	2013	0.954205	0.991019	0.996869
Oceania excluding Australia and New Zealand	Urban	2013	0.281676	0.423386	0.602702
Sub-Saharan Africa	Urban	2013	0.25006	0.271297	0.292582
Western Asia and Northern Africa	Urban	2013	0.951564	0.969514	0.980834
Australia and New Zealand	Urban	2014	1	1	1
Central Asia and Southern Asia	Urban	2014	0.682665	0.772583	0.842989
Eastern Asia and South-eastern Asia	Urban	2014	0.664183	0.812658	0.906022
Latin America & the Caribbean	Urban	2014	0.919603	0.946484	0.960149
Northern America and Europe	Urban	2014	0.948375	0.989949	0.996903
Oceania excluding Australia and New Zealand	Urban	2014	0.270905	0.422289	0.611084
Sub-Saharan Africa	Urban	2014	0.254939	0.27711	0.300715
Western Asia and Northern Africa	Urban	2014	0.95273	0.970814	0.981973
Australia and New Zealand	Urban	2015	1	1	1
Central Asia and Southern Asia	Urban	2015	0.691076	0.783612	0.85469
Eastern Asia and South-eastern Asia	Urban	2015	0.660273	0.820136	0.912384
Latin America & the Caribbean	Urban	2015	0.918499	0.946195	0.960865
Northern America and Europe	Urban	2015	0.940735	0.989023	0.996765
Oceania excluding Australia and New Zealand	Urban	2015	0.257967	0.419695	0.620622
Sub-Saharan Africa	Urban	2015	0.261416	0.283923	0.307674
Western Asia and Northern Africa	Urban	2015	0.952676	0.970992	0.983132
Australia and New Zealand	Urban	2016	1	1	1
Central Asia and Southern Asia	Urban	2016	0.685582	0.79533	0.870513
Eastern Asia and South-eastern Asia	Urban	2016	0.653293	0.825328	0.9217
Latin America & the Caribbean	Urban	2016	0.917275	0.945611	0.959951
Northern America and Europe	Urban	2016	0.937057	0.987685	0.996825
Oceania excluding Australia and New Zealand	Urban	2016	0.247459	0.415426	0.632439
Sub-Saharan Africa	Urban	2016	0.268201	0.292947	0.317932
Western Asia and Northern Africa	Urban	2016	0.95196	0.971758	0.98409
Australia and New Zealand	Urban	2017	1	1	1
Central Asia and Southern Asia	Urban	2017	0.695894	0.805677	0.880693
Eastern Asia and South-eastern Asia	Urban	2017	0.639669	0.833931	0.93057
Latin America & the Caribbean	Urban	2017	0.918153	0.945241	0.960708
Northern America and Europe	Urban	2017	0.92611	0.986668	0.99667
Oceania excluding Australia and New Zealand	Urban	2017	0.231623	0.410098	0.648335
Sub-Saharan Africa	Urban	2017	0.274221	0.301123	0.329808
Western Asia and Northern Africa	Urban	2017	0.952141	0.971821	0.985168
Australia and New Zealand	Urban	2018	1	1	1
Central Asia and Southern Asia	Urban	2018	0.695424	0.815546	0.891664
Eastern Asia and South-eastern Asia	Urban	2018	0.632662	0.840281	0.936397
Latin America & the Caribbean	Urban	2018	0.915063	0.944799	0.960412
Northern America and Europe	Urban	2018	0.91559	0.985249	0.99669
Oceania excluding Australia and New Zealand	Urban	2018	0.22142	0.410025	0.657786
Sub-Saharan Africa	Urban	2018	0.28211	0.311731	0.342164
Western Asia and Northern Africa	Urban	2018	0.950167	0.971663	0.985881
Australia and New Zealand	Urban	2019	1	1	1
Central Asia and Southern Asia	Urban	2019	0.696972	0.825049	0.90141
Eastern Asia and South-eastern Asia	Urban	2019	0.616768	0.844206	0.942905
Latin America & the Caribbean	Urban	2019	0.910377	0.943569	0.961239
Northern America and Europe	Urban	2019	0.908118	0.983897	0.996657
Oceania excluding Australia and New Zealand	Urban	2019	0.206536	0.400465	0.66602
Sub-Saharan Africa	Urban	2019	0.288353	0.32103	0.356524
Western Asia and Northern Africa	Urban	2019	0.948921	0.971366	0.986639
Australia and New Zealand	Urban	2020	1	1	1
Central Asia and Southern Asia	Urban	2020	0.692336	0.83287	0.911248
Eastern Asia and South-eastern Asia	Urban	2020	0.597209	0.849925	0.949069
Latin America & the Caribbean	Urban	2020	0.907725	0.942241	0.960373
Northern America and Europe	Urban	2020	0.902936	0.981916	0.99642
Oceania excluding Australia and New Zealand	Urban	2020	0.196278	0.395885	0.67146
Sub-Saharan Africa	Urban	2020	0.292044	0.329696	0.370315
Western Asia and Northern Africa	Urban	2020	0.946807	0.970695	0.986848
Australia and New Zealand	Urban	2021	1	1	1
Central Asia and Southern Asia	Urban	2021	0.690045	0.84153	0.918929
Eastern Asia and South-eastern Asia	Urban	2021	0.573456	0.854471	0.952748
Latin America & the Caribbean	Urban	2021	0.902844	0.940304	0.96052
Northern America and Europe	Urban	2021	0.89541	0.980684	0.996481
Oceania excluding Australia and New Zealand	Urban	2021	0.181701	0.390674	0.689212
Sub-Saharan Africa	Urban	2021	0.295264	0.335551	0.379429
Western Asia and Northern Africa	Urban	2021	0.942232	0.970206	0.987699
Australia and New Zealand	Urban	2022	1	1	1
Central Asia and Southern Asia	Urban	2022	0.690677	0.848229	0.925588
Eastern Asia and South-eastern Asia	Urban	2022	0.553115	0.85866	0.95571
Latin America & the Caribbean	Urban	2022	0.897328	0.938699	0.961424
Northern America and Europe	Urban	2022	0.889985	0.978069	0.996213
Oceania excluding Australia and New Zealand	Urban	2022	0.173868	0.383705	0.695456
Sub-Saharan Africa	Urban	2022	0.297618	0.340661	0.389994
Western Asia and Northern Africa	Urban	2022	0.93941	0.968831	0.987951
Australia and New Zealand	Urban	2023	1	1	1
Central Asia and Southern Asia	Urban	2023	0.685725	0.854556	0.932192
Eastern Asia and South-eastern Asia	Urban	2023	0.531522	0.862804	0.958755
Latin America & the Caribbean	Urban	2023	0.891568	0.935892	0.960049
Northern America and Europe	Urban	2023	0.882263	0.975186	0.996208
Oceania excluding Australia and New Zealand	Urban	2023	0.160828	0.376268	0.701899
Sub-Saharan Africa	Urban	2023	0.295937	0.343664	0.3955
Western Asia and Northern Africa	Urban	2023	0.933773	0.967972	0.987886
Australia and New Zealand	Urban	2024	1	1	1
Central Asia and Southern Asia	Urban	2024	0.679848	0.860935	0.937827
Eastern Asia and South-eastern Asia	Urban	2024	0.525435	0.866306	0.961155
Latin America & the Caribbean	Urban	2024	0.882533	0.933865	0.960545
Northern America and Europe	Urban	2024	0.879767	0.972736	0.99599
Oceania excluding Australia and New Zealand	Urban	2024	0.153824	0.368763	0.710243
Sub-Saharan Africa	Urban	2024	0.295676	0.345742	0.404031
Western Asia and Northern Africa	Urban	2024	0.92809	0.966537	0.987872
Australia and New Zealand	Urban	2025	1	1	1
Central Asia and Southern Asia	Urban	2025	0.671522	0.867416	0.941447
Eastern Asia and South-eastern Asia	Urban	2025	0.497752	0.869067	0.963522
Latin America & the Caribbean	Urban	2025	0.872724	0.930901	0.959534
Northern America and Europe	Urban	2025	0.877214	0.969589	0.99574
Oceania excluding Australia and New Zealand	Urban	2025	0.138997	0.359234	0.713537
Sub-Saharan Africa	Urban	2025	0.29101	0.346174	0.408268
Western Asia and Northern Africa	Urban	2025	0.923927	0.964792	0.987444
Australia and New Zealand	Urban	2026	1	1	1
Central Asia and Southern Asia	Urban	2026	0.665693	0.870874	0.946354
Eastern Asia and South-eastern Asia	Urban	2026	0.484653	0.868499	0.964428
Latin America & the Caribbean	Urban	2026	0.864061	0.927783	0.959937
Northern America and Europe	Urban	2026	0.87441	0.967194	0.995709
Oceania excluding Australia and New Zealand	Urban	2026	0.132566	0.353998	0.721745
Sub-Saharan Africa	Urban	2026	0.287039	0.345624	0.410433
Western Asia and Northern Africa	Urban	2026	0.916474	0.962869	0.987591
Australia and New Zealand	Urban	2027	1	1	1
Central Asia and Southern Asia	Urban	2027	0.655725	0.873002	0.950305
Eastern Asia and South-eastern Asia	Urban	2027	0.468533	0.87358	0.966437
Latin America & the Caribbean	Urban	2027	0.850122	0.924961	0.95911
Northern America and Europe	Urban	2027	0.873385	0.964383	0.995536
Oceania excluding Australia and New Zealand	Urban	2027	0.120919	0.343177	0.72843
Sub-Saharan Africa	Urban	2027	0.283461	0.343574	0.412934
Western Asia and Northern Africa	Urban	2027	0.90636	0.960773	0.987624
Australia and New Zealand	Urban	2028	1	1	1
Central Asia and Southern Asia	Urban	2028	0.649529	0.878223	0.953545
Eastern Asia and South-eastern Asia	Urban	2028	0.449391	0.874471	0.967958
Latin America & the Caribbean	Urban	2028	0.841135	0.921313	0.957721
Northern America and Europe	Urban	2028	0.872104	0.959891	0.995424
Oceania excluding Australia and New Zealand	Urban	2028	0.117788	0.338791	0.73024
Sub-Saharan Africa	Urban	2028	0.279273	0.342303	0.414851
Western Asia and Northern Africa	Urban	2028	0.90056	0.958822	0.987322
Australia and New Zealand	Urban	2029	1	1	1
Central Asia and Southern Asia	Urban	2029	0.649407	0.879284	0.956685
Eastern Asia and South-eastern Asia	Urban	2029	0.434956	0.875059	0.970231
Latin America & the Caribbean	Urban	2029	0.829214	0.916617	0.95687
Northern America and Europe	Urban	2029	0.871452	0.957427	0.995343
Oceania excluding Australia and New Zealand	Urban	2029	0.106077	0.329671	0.738873
Sub-Saharan Africa	Urban	2029	0.276055	0.340497	0.417262
Western Asia and Northern Africa	Urban	2029	0.892246	0.955414	0.98701
Australia and New Zealand	Urban	2030	1	1	1
Central Asia and Southern Asia	Urban	2030	0.633789	0.883493	0.958993
Eastern Asia and South-eastern Asia	Urban	2030	0.418936	0.877378	0.971332
Latin America & the Caribbean	Urban	2030	0.815386	0.913506	0.956193
Northern America and Europe	Urban	2030	0.870517	0.953232	0.994896
Oceania excluding Australia and New Zealand	Urban	2030	0.100149	0.325746	0.746816
Sub-Saharan Africa	Urban	2030	0.27273	0.337452	0.41884
Western Asia and Northern Africa	Urban	2030	0.881258	0.95212	0.986201
Australia and New Zealand	Rural	1990	1	1	1
Central Asia and Southern Asia	Rural	1990	0.039405	0.0648721	0.0969165
Eastern Asia and South-eastern Asia	Rural	1990	0.0648722	0.265676	0.632355
Latin America & the Caribbean	Rural	1990	0.235461	0.315209	0.408519
Northern America and Europe	Rural	1990	0.877485	0.919617	0.956234
Oceania excluding Australia and New Zealand	Rural	1990	0.0213778	0.0567491	0.180887
Sub-Saharan Africa	Rural	1990	0.020242	0.0368102	0.0783116
Western Asia and Northern Africa	Rural	1990	0.39196	0.529593	0.670423
Australia and New Zealand	Rural	1991	1	1	1
Central Asia and Southern Asia	Rural	1991	0.04189	0.0660561	0.096895
Eastern Asia and South-eastern Asia	Rural	1991	0.0675262	0.258461	0.606538
Latin America & the Caribbean	Rural	1991	0.244513	0.324878	0.412411
Northern America and Europe	Rural	1991	0.881874	0.921594	0.957066
Oceania excluding Australia and New Zealand	Rural	1991	0.0215057	0.0554823	0.163414
Sub-Saharan Africa	Rural	1991	0.0196419	0.0345298	0.0717687
Western Asia and Northern Africa	Rural	1991	0.405335	0.539271	0.671345
Australia and New Zealand	Rural	1992	1	1	1
Central Asia and Southern Asia	Rural	1992	0.0445242	0.0680108	0.0997343
Eastern Asia and South-eastern Asia	Rural	1992	0.0726053	0.260539	0.577115
Latin America & the Caribbean	Rural	1992	0.260545	0.334351	0.415558
Northern America and Europe	Rural	1992	0.884129	0.923106	0.957348
Oceania excluding Australia and New Zealand	Rural	1992	0.0215169	0.0548788	0.154946
Sub-Saharan Africa	Rural	1992	0.0192837	0.0330235	0.0676192
Western Asia and Northern Africa	Rural	1992	0.422991	0.549347	0.673024
Australia and New Zealand	Rural	1993	1	1	1
Central Asia and Southern Asia	Rural	1993	0.0470633	0.070112	0.0992089
Eastern Asia and South-eastern Asia	Rural	1993	0.0781381	0.260064	0.557249
Latin America & the Caribbean	Rural	1993	0.271399	0.347043	0.422314
Northern America and Europe	Rural	1993	0.887453	0.924493	0.957291
Oceania excluding Australia and New Zealand	Rural	1993	0.0220029	0.0538429	0.14726
Sub-Saharan Africa	Rural	1993	0.0194537	0.0315074	0.0619343
Western Asia and Northern Africa	Rural	1993	0.443263	0.561538	0.681063
Australia and New Zealand	Rural	1994	1	1	1
Central Asia and Southern Asia	Rural	1994	0.0495341	0.0725677	0.102495
Eastern Asia and South-eastern Asia	Rural	1994	0.0794871	0.252745	0.531098
Latin America & the Caribbean	Rural	1994	0.280473	0.356667	0.431936
Northern America and Europe	Rural	1994	0.892015	0.925749	0.958675
Oceania excluding Australia and New Zealand	Rural	1994	0.021782	0.0518942	0.137707
Sub-Saharan Africa	Rural	1994	0.0185623	0.030586	0.0565108
Western Asia and Northern Africa	Rural	1994	0.457207	0.572823	0.680999
Australia and New Zealand	Rural	1995	1	1	1
Central Asia and Southern Asia	Rural	1995	0.0522049	0.0748193	0.105991
Eastern Asia and South-eastern Asia	Rural	1995	0.0877207	0.248139	0.507976
Latin America & the Caribbean	Rural	1995	0.294337	0.367316	0.439677
Northern America and Europe	Rural	1995	0.896033	0.927978	0.958475
Oceania excluding Australia and New Zealand	Rural	1995	0.021946	0.0507689	0.132996
Sub-Saharan Africa	Rural	1995	0.0188504	0.0296956	0.0545119
Western Asia and Northern Africa	Rural	1995	0.481442	0.588071	0.686273
Australia and New Zealand	Rural	1996	1	1	1
Central Asia and Southern Asia	Rural	1996	0.0550799	0.0776111	0.109939
Eastern Asia and South-eastern Asia	Rural	1996	0.0945676	0.246419	0.496348
Latin America & the Caribbean	Rural	1996	0.305227	0.378784	0.44982
Northern America and Europe	Rural	1996	0.899942	0.92974	0.959923
Oceania excluding Australia and New Zealand	Rural	1996	0.0217404	0.0494779	0.128834
Sub-Saharan Africa	Rural	1996	0.018398	0.0289426	0.0521289
Western Asia and Northern Africa	Rural	1996	0.502797	0.603498	0.69126
Australia and New Zealand	Rural	1997	1	1	1
Central Asia and Southern Asia	Rural	1997	0.0580228	0.0820075	0.116482
Eastern Asia and South-eastern Asia	Rural	1997	0.0982085	0.245964	0.482424
Latin America & the Caribbean	Rural	1997	0.318491	0.388758	0.458518
Northern America and Europe	Rural	1997	0.902376	0.932116	0.960458
Oceania excluding Australia and New Zealand	Rural	1997	0.0219488	0.0484687	0.121654
Sub-Saharan Africa	Rural	1997	0.0191029	0.0285972	0.0480535
Western Asia and Northern Africa	Rural	1997	0.528947	0.620262	0.700417
Australia and New Zealand	Rural	1998	1	1	1
Central Asia and Southern Asia	Rural	1998	0.0600694	0.0853867	0.12024
Eastern Asia and South-eastern Asia	Rural	1998	0.106877	0.240196	0.463727
Latin America & the Caribbean	Rural	1998	0.327307	0.398799	0.469129
Northern America and Europe	Rural	1998	0.905895	0.934632	0.960417
Oceania excluding Australia and New Zealand	Rural	1998	0.0219674	0.0468802	0.118976
Sub-Saharan Africa	Rural	1998	0.0191626	0.0283197	0.0455373
Western Asia and Northern Africa	Rural	1998	0.55628	0.639504	0.71193
Australia and New Zealand	Rural	1999	1	1	1
Central Asia and Southern Asia	Rural	1999	0.0646439	0.0907347	0.127888
Eastern Asia and South-eastern Asia	Rural	1999	0.107264	0.238407	0.451168
Latin America & the Caribbean	Rural	1999	0.340788	0.407526	0.475533
Northern America and Europe	Rural	1999	0.909394	0.937705	0.962002
Oceania excluding Australia and New Zealand	Rural	1999	0.0211965	0.0452772	0.113719
Sub-Saharan Africa	Rural	1999	0.0196867	0.0284851	0.045007
Western Asia and Northern Africa	Rural	1999	0.580683	0.659114	0.722389
Australia and New Zealand	Rural	2000	1	1	1
Central Asia and Southern Asia	Rural	2000	0.0671529	0.0951282	0.134132
Eastern Asia and South-eastern Asia	Rural	2000	0.111975	0.237889	0.446335
Latin America & the Caribbean	Rural	2000	0.352034	0.418738	0.483714
Northern America and Europe	Rural	2000	0.913688	0.941165	0.962801
Oceania excluding Australia and New Zealand	Rural	2000	0.0209617	0.04469	0.114082
Sub-Saharan Africa	Rural	2000	0.0200397	0.0286107	0.044111
Western Asia and Northern Africa	Rural	2000	0.605594	0.678666	0.73531
Australia and New Zealand	Rural	2001	1	1	1
Central Asia and Southern Asia	Rural	2001	0.0702816	0.0996314	0.140902
Eastern Asia and South-eastern Asia	Rural	2001	0.113764	0.236863	0.427813
Latin America & the Caribbean	Rural	2001	0.363739	0.429372	0.49513
Northern America and Europe	Rural	2001	0.915777	0.94428	0.963809
Oceania excluding Australia and New Zealand	Rural	2001	0.0210423	0.0429958	0.108842
Sub-Saharan Africa	Rural	2001	0.020991	0.0294679	0.0425549
Western Asia and Northern Africa	Rural	2001	0.632197	0.695254	0.747746
Australia and New Zealand	Rural	2002	1	1	1
Central Asia and Southern Asia	Rural	2002	0.073126	0.104318	0.148265
Eastern Asia and South-eastern Asia	Rural	2002	0.119499	0.237138	0.439058
Latin America & the Caribbean	Rural	2002	0.373678	0.441144	0.504847
Northern America and Europe	Rural	2002	0.917855	0.947468	0.964907
Oceania excluding Australia and New Zealand	Rural	2002	0.0204396	0.0422832	0.109927
Sub-Saharan Africa	Rural	2002	0.0216639	0.0299485	0.0430817
Western Asia and Northern Africa	Rural	2002	0.651343	0.713521	0.759963
Australia and New Zealand	Rural	2003	1	1	1
Central Asia and Southern Asia	Rural	2003	0.0764719	0.109393	0.153943
Eastern Asia and South-eastern Asia	Rural	2003	0.121974	0.235746	0.416048
Latin America & the Caribbean	Rural	2003	0.388018	0.451415	0.514228
Northern America and Europe	Rural	2003	0.919898	0.950613	0.966194
Oceania excluding Australia and New Zealand	Rural	2003	0.0211644	0.0414517	0.105158
Sub-Saharan Africa	Rural	2003	0.022288	0.0308142	0.0431094
Western Asia and Northern Africa	Rural	2003	0.672249	0.72855	0.772884
Australia and New Zealand	Rural	2004	1	1	1
Central Asia and Southern Asia	Rural	2004	0.0824137	0.114049	0.159595
Eastern Asia and South-eastern Asia	Rural	2004	0.127284	0.240675	0.415062
Latin America & the Caribbean	Rural	2004	0.396063	0.460416	0.521132
Northern America and Europe	Rural	2004	0.918531	0.953069	0.967619
Oceania excluding Australia and New Zealand	Rural	2004	0.0200685	0.0404664	0.102954
Sub-Saharan Africa	Rural	2004	0.0232976	0.0315247	0.0437188
Western Asia and Northern Africa	Rural	2004	0.688232	0.740957	0.782195
Australia and New Zealand	Rural	2005	1	1	1
Central Asia and Southern Asia	Rural	2005	0.0852003	0.119026	0.168058
Eastern Asia and South-eastern Asia	Rural	2005	0.133124	0.244033	0.433142
Latin America & the Caribbean	Rural	2005	0.408163	0.470778	0.532218
Northern America and Europe	Rural	2005	0.92119	0.955047	0.968415
Oceania excluding Australia and New Zealand	Rural	2005	0.0197666	0.0401352	0.103061
Sub-Saharan Africa	Rural	2005	0.0240997	0.0325276	0.0447092
Western Asia and Northern Africa	Rural	2005	0.700919	0.75178	0.79208
Australia and New Zealand	Rural	2006	1	1	1
Central Asia and Southern Asia	Rural	2006	0.088936	0.124623	0.175953
Eastern Asia and South-eastern Asia	Rural	2006	0.135201	0.249576	0.422766
Latin America & the Caribbean	Rural	2006	0.420966	0.481129	0.54079
Northern America and Europe	Rural	2006	0.919591	0.956497	0.969301
Oceania excluding Australia and New Zealand	Rural	2006	0.0195435	0.0392066	0.100979
Sub-Saharan Africa	Rural	2006	0.0247144	0.0332209	0.0449941
Western Asia and Northern Africa	Rural	2006	0.713692	0.76174	0.797596
Australia and New Zealand	Rural	2007	1	1	1
Central Asia and Southern Asia	Rural	2007	0.0945233	0.131414	0.181945
Eastern Asia and South-eastern Asia	Rural	2007	0.138347	0.255356	0.433861
Latin America & the Caribbean	Rural	2007	0.428724	0.48916	0.547215
Northern America and Europe	Rural	2007	0.920542	0.957194	0.969833
Oceania excluding Australia and New Zealand	Rural	2007	0.0190327	0.0387874	0.0978577
Sub-Saharan Africa	Rural	2007	0.0256333	0.0341121	0.0455122
Western Asia and Northern Africa	Rural	2007	0.72676	0.770409	0.80699
Australia and New Zealand	Rural	2008	1	1	1
Central Asia and Southern Asia	Rural	2008	0.098207	0.13721	0.18904
Eastern Asia and South-eastern Asia	Rural	2008	0.145032	0.264937	0.441123
Latin America & the Caribbean	Rural	2008	0.442622	0.499363	0.553235
Northern America and Europe	Rural	2008	0.910358	0.957247	0.970543
Oceania excluding Australia and New Zealand	Rural	2008	0.0183575	0.0377369	0.100101
Sub-Saharan Africa	Rural	2008	0.02656	0.0349096	0.0453742
Western Asia and Northern Africa	Rural	2008	0.735363	0.777852	0.812635
Australia and New Zealand	Rural	2009	1	1	1
Central Asia and Southern Asia	Rural	2009	0.102757	0.144483	0.200421
Eastern Asia and South-eastern Asia	Rural	2009	0.151968	0.274585	0.458603
Latin America & the Caribbean	Rural	2009	0.45161	0.507309	0.561284
Northern America and Europe	Rural	2009	0.906322	0.956891	0.970763
Oceania excluding Australia and New Zealand	Rural	2009	0.0180446	0.0370996	0.103728
Sub-Saharan Africa	Rural	2009	0.0275372	0.0356768	0.0469383
Western Asia and Northern Africa	Rural	2009	0.745032	0.785431	0.819843
Australia and New Zealand	Rural	2010	1	1	1
Central Asia and Southern Asia	Rural	2010	0.110771	0.154294	0.212109
Eastern Asia and South-eastern Asia	Rural	2010	0.161834	0.289519	0.464289
Latin America & the Caribbean	Rural	2010	0.458328	0.516395	0.568435
Northern America and Europe	Rural	2010	0.903926	0.955876	0.970974
Oceania excluding Australia and New Zealand	Rural	2010	0.0175478	0.036673	0.110613
Sub-Saharan Africa	Rural	2010	0.0276814	0.036305	0.047647
Western Asia and Northern Africa	Rural	2010	0.752971	0.790906	0.824539
Australia and New Zealand	Rural	2011	1	1	1
Central Asia and Southern Asia	Rural	2011	0.118615	0.162902	0.224831
Eastern Asia and South-eastern Asia	Rural	2011	0.168686	0.303607	0.477663
Latin America & the Caribbean	Rural	2011	0.470287	0.525686	0.575067
Northern America and Europe	Rural	2011	0.899973	0.954771	0.97086
Oceania excluding Australia and New Zealand	Rural	2011	0.016773	0.0360883	0.108761
Sub-Saharan Africa	Rural	2011	0.0288436	0.037196	0.0483237
Western Asia and Northern Africa	Rural	2011	0.758159	0.796418	0.831271
Australia and New Zealand	Rural	2012	1	1	1
Central Asia and Southern Asia	Rural	2012	0.125621	0.174743	0.237329
Eastern Asia and South-eastern Asia	Rural	2012	0.178228	0.317705	0.500958
Latin America & the Caribbean	Rural	2012	0.481696	0.534707	0.584703
Northern America and Europe	Rural	2012	0.891153	0.953311	0.97039
Oceania excluding Australia and New Zealand	Rural	2012	0.015894	0.0351355	0.109823
Sub-Saharan Africa	Rural	2012	0.0288792	0.0377487	0.0496004
Western Asia and Northern Africa	Rural	2012	0.764496	0.801703	0.835221
Australia and New Zealand	Rural	2013	1	1	1
Central Asia and Southern Asia	Rural	2013	0.133146	0.187226	0.25133
Eastern Asia and South-eastern Asia	Rural	2013	0.189099	0.332614	0.511192
Latin America & the Caribbean	Rural	2013	0.48815	0.545271	0.593177
Northern America and Europe	Rural	2013	0.877503	0.951245	0.970294
Oceania excluding Australia and New Zealand	Rural	2013	0.0152824	0.0360108	0.116441
Sub-Saharan Africa	Rural	2013	0.0297019	0.038162	0.0504911
Western Asia and Northern Africa	Rural	2013	0.768831	0.806354	0.841176
Australia and New Zealand	Rural	2014	1	1	1
Central Asia and Southern Asia	Rural	2014	0.139324	0.202517	0.270265
Eastern Asia and South-eastern Asia	Rural	2014	0.194381	0.351635	0.551277
Latin America & the Caribbean	Rural	2014	0.49986	0.554898	0.603543
Northern America and Europe	Rural	2014	0.873648	0.949241	0.970217
Oceania excluding Australia and New Zealand	Rural	2014	0.0150973	0.0354921	0.129295
Sub-Saharan Africa	Rural	2014	0.0303371	0.0388875	0.0508488
Western Asia and Northern Africa	Rural	2014	0.767987	0.810073	0.848584
Australia and New Zealand	Rural	2015	1	1	1
Central Asia and Southern Asia	Rural	2015	0.148299	0.218861	0.297098
Eastern Asia and South-eastern Asia	Rural	2015	0.206511	0.367077	0.57317
Latin America & the Caribbean	Rural	2015	0.506744	0.566241	0.615211
Northern America and Europe	Rural	2015	0.863144	0.946598	0.970032
Oceania excluding Australia and New Zealand	Rural	2015	0.0145749	0.0340544	0.146531
Sub-Saharan Africa	Rural	2015	0.0309146	0.0396626	0.0524387
Western Asia and Northern Africa	Rural	2015	0.771729	0.813431	0.851694
Australia and New Zealand	Rural	2016	1	1	1
Central Asia and Southern Asia	Rural	2016	0.160609	0.237363	0.323582
Eastern Asia and South-eastern Asia	Rural	2016	0.211633	0.385842	0.611426
Latin America & the Caribbean	Rural	2016	0.51499	0.576954	0.626861
Northern America and Europe	Rural	2016	0.85471	0.944438	0.97014
Oceania excluding Australia and New Zealand	Rural	2016	0.0140897	0.0345573	0.151115
Sub-Saharan Africa	Rural	2016	0.0312978	0.0402936	0.0549248
Western Asia and Northern Africa	Rural	2016	0.771194	0.816477	0.860038
Australia and New Zealand	Rural	2017	1	1	1
Central Asia and Southern Asia	Rural	2017	0.16863	0.254419	0.356142
Eastern Asia and South-eastern Asia	Rural	2017	0.220048	0.404009	0.639791
Latin America & the Caribbean	Rural	2017	0.525391	0.587743	0.637919
Northern America and Europe	Rural	2017	0.847522	0.941716	0.969543
Oceania excluding Australia and New Zealand	Rural	2017	0.0136197	0.0337869	0.168038
Sub-Saharan Africa	Rural	2017	0.0315331	0.041443	0.0554607
Western Asia and Northern Africa	Rural	2017	0.769594	0.818834	0.866123
Australia and New Zealand	Rural	2018	1	1	1
Central Asia and Southern Asia	Rural	2018	0.172961	0.277569	0.394493
Eastern Asia and South-eastern Asia	Rural	2018	0.221481	0.418268	0.674513
Latin America & the Caribbean	Rural	2018	0.530329	0.596765	0.650047
Northern America and Europe	Rural	2018	0.838961	0.93955	0.968581
Oceania excluding Australia and New Zealand	Rural	2018	0.0129662	0.0338427	0.193211
Sub-Saharan Africa	Rural	2018	0.0320768	0.0423931	0.0592371
Western Asia and Northern Africa	Rural	2018	0.767427	0.822611	0.873973
Australia and New Zealand	Rural	2019	1	1	1
Central Asia and Southern Asia	Rural	2019	0.1789	0.297953	0.440498
Eastern Asia and South-eastern Asia	Rural	2019	0.233863	0.435705	0.702558
Latin America & the Caribbean	Rural	2019	0.53797	0.605376	0.659989
Northern America and Europe	Rural	2019	0.829793	0.936829	0.969284
Oceania excluding Australia and New Zealand	Rural	2019	0.0128236	0.0340932	0.205281
Sub-Saharan Africa	Rural	2019	0.032373	0.0432587	0.059573
Western Asia and Northern Africa	Rural	2019	0.765458	0.823837	0.881995
Australia and New Zealand	Rural	2020	1	1	1
Central Asia and Southern Asia	Rural	2020	0.183488	0.323657	0.488732
Eastern Asia and South-eastern Asia	Rural	2020	0.241297	0.452903	0.729121
Latin America & the Caribbean	Rural	2020	0.541616	0.615469	0.67199
Northern America and Europe	Rural	2020	0.821574	0.933853	0.968751
Oceania excluding Australia and New Zealand	Rural	2020	0.0123773	0.0336674	0.231854
Sub-Saharan Africa	Rural	2020	0.0328608	0.0447528	0.0638611
Western Asia and Northern Africa	Rural	2020	0.762742	0.825891	0.88861
Australia and New Zealand	Rural	2021	1	1	1
Central Asia and Southern Asia	Rural	2021	0.193363	0.346585	0.526665
Eastern Asia and South-eastern Asia	Rural	2021	0.248821	0.464666	0.749725
Latin America & the Caribbean	Rural	2021	0.542367	0.623084	0.686473
Northern America and Europe	Rural	2021	0.815423	0.931801	0.968556
Oceania excluding Australia and New Zealand	Rural	2021	0.0119946	0.0337428	0.257975
Sub-Saharan Africa	Rural	2021	0.033106	0.0461059	0.0677052
Western Asia and Northern Africa	Rural	2021	0.760615	0.827919	0.894472
Australia and New Zealand	Rural	2022	1	1	1
Central Asia and Southern Asia	Rural	2022	0.197629	0.36992	0.568183
Eastern Asia and South-eastern Asia	Rural	2022	0.250791	0.482835	0.776473
Latin America & the Caribbean	Rural	2022	0.545678	0.630879	0.697252
Northern America and Europe	Rural	2022	0.811373	0.929256	0.968801
Oceania excluding Australia and New Zealand	Rural	2022	0.0115966	0.0328979	0.288909
Sub-Saharan Africa	Rural	2022	0.0333937	0.0475019	0.0702076
Western Asia and Northern Africa	Rural	2022	0.755683	0.831027	0.900531
Australia and New Zealand	Rural	2023	1	1	1
Central Asia and Southern Asia	Rural	2023	0.19917	0.396589	0.614881
Eastern Asia and South-eastern Asia	Rural	2023	0.258796	0.49852	0.790196
Latin America & the Caribbean	Rural	2023	0.547079	0.638197	0.709732
Northern America and Europe	Rural	2023	0.806028	0.92698	0.968758
Oceania excluding Australia and New Zealand	Rural	2023	0.0112502	0.0326768	0.313847
Sub-Saharan Africa	Rural	2023	0.0337577	0.0493803	0.0752516
Western Asia and Northern Africa	Rural	2023	0.752293	0.831941	0.906593
Australia and New Zealand	Rural	2024	1	1	1
Central Asia and Southern Asia	Rural	2024	0.203937	0.422229	0.648789
Eastern Asia and South-eastern Asia	Rural	2024	0.266257	0.512883	0.808825
Latin America & the Caribbean	Rural	2024	0.544088	0.6455	0.71994
Northern America and Europe	Rural	2024	0.803504	0.923989	0.967257
Oceania excluding Australia and New Zealand	Rural	2024	0.0108096	0.0327913	0.359102
Sub-Saharan Africa	Rural	2024	0.0342429	0.0508249	0.0793666
Western Asia and Northern Africa	Rural	2024	0.749173	0.833744	0.909436
Australia and New Zealand	Rural	2025	1	1	1
Central Asia and Southern Asia	Rural	2025	0.211033	0.448791	0.687313
Eastern Asia and South-eastern Asia	Rural	2025	0.273071	0.524321	0.818473
Latin America & the Caribbean	Rural	2025	0.550424	0.651206	0.72708
Northern America and Europe	Rural	2025	0.799863	0.91964	0.967795
Oceania excluding Australia and New Zealand	Rural	2025	0.0106027	0.0325309	0.382953
Sub-Saharan Africa	Rural	2025	0.0342331	0.051923	0.0846344
Western Asia and Northern Africa	Rural	2025	0.744554	0.833576	0.913998
Australia and New Zealand	Rural	2026	1	1	1
Central Asia and Southern Asia	Rural	2026	0.217274	0.477021	0.712845
Eastern Asia and South-eastern Asia	Rural	2026	0.275454	0.53963	0.83039
Latin America & the Caribbean	Rural	2026	0.545226	0.656542	0.739397
Northern America and Europe	Rural	2026	0.794593	0.916555	0.967566
Oceania excluding Australia and New Zealand	Rural	2026	0.010406	0.0323788	0.396707
Sub-Saharan Africa	Rural	2026	0.0350633	0.0537895	0.0916565
Western Asia and Northern Africa	Rural	2026	0.740445	0.835388	0.919452
Australia and New Zealand	Rural	2027	1	1	1
Central Asia and Southern Asia	Rural	2027	0.219677	0.501207	0.74433
Eastern Asia and South-eastern Asia	Rural	2027	0.280187	0.548615	0.841199
Latin America & the Caribbean	Rural	2027	0.548576	0.660705	0.74482
Northern America and Europe	Rural	2027	0.794862	0.913906	0.966793
Oceania excluding Australia and New Zealand	Rural	2027	0.00975295	0.0330409	0.442266
Sub-Saharan Africa	Rural	2027	0.0345996	0.0555183	0.09716
Western Asia and Northern Africa	Rural	2027	0.737322	0.834323	0.923159
Australia and New Zealand	Rural	2028	1	1	1
Central Asia and Southern Asia	Rural	2028	0.223911	0.527757	0.766303
Eastern Asia and South-eastern Asia	Rural	2028	0.283574	0.562151	0.850458
Latin America & the Caribbean	Rural	2028	0.543965	0.666409	0.755546
Northern America and Europe	Rural	2028	0.790913	0.913373	0.966627
Oceania excluding Australia and New Zealand	Rural	2028	0.0097022	0.0331592	0.471752
Sub-Saharan Africa	Rural	2028	0.0349981	0.0566173	0.102979
Western Asia and Northern Africa	Rural	2028	0.732028	0.836194	0.924317
Australia and New Zealand	Rural	2029	1	1	1
Central Asia and Southern Asia	Rural	2029	0.23346	0.552452	0.791829
Eastern Asia and South-eastern Asia	Rural	2029	0.2896	0.572522	0.853286
Latin America & the Caribbean	Rural	2029	0.541207	0.669038	0.761521
Northern America and Europe	Rural	2029	0.790044	0.910624	0.966193
Oceania excluding Australia and New Zealand	Rural	2029	0.00967255	0.0338639	0.518912
Sub-Saharan Africa	Rural	2029	0.0354488	0.0592682	0.108862
Western Asia and Northern Africa	Rural	2029	0.729656	0.83586	0.926675
Australia and New Zealand	Rural	2030	1	1	1
Central Asia and Southern Asia	Rural	2030	0.241485	0.57914	0.809252
Eastern Asia and South-eastern Asia	Rural	2030	0.290483	0.586822	0.861297
Latin America & the Caribbean	Rural	2030	0.535925	0.672743	0.767712
Northern America and Europe	Rural	2030	0.786952	0.905893	0.965454
Oceania excluding Australia and New Zealand	Rural	2030	0.00943867	0.0331518	0.538269
Sub-Saharan Africa	Rural	2030	0.0352389	0.0607055	0.120139
Western Asia and Northern Africa	Rural	2030	0.722548	0.834567	0.929576
Australia and New Zealand	Overall	1990	1	1	1
Central Asia and Southern Asia	Overall	1990	0.115459	0.173665	0.257062
Eastern Asia and South-eastern Asia	Overall	1990	0.215974	0.402045	0.637953
Latin America & the Caribbean	Overall	1990	0.639046	0.697269	0.748256
Northern America and Europe	Overall	1990	0.944081	0.966937	0.981155
Oceania excluding Australia and New Zealand	Overall	1990	0.0676609	0.11811	0.221724
Sub-Saharan Africa	Overall	1990	0.0759221	0.0971198	0.133642
Western Asia and Northern Africa	Overall	1990	0.611042	0.709603	0.787845
Australia and New Zealand	Overall	1991	1	1	1
Central Asia and Southern Asia	Overall	1991	0.122228	0.181261	0.26724
Eastern Asia and South-eastern Asia	Overall	1991	0.21973	0.4033	0.621946
Latin America & the Caribbean	Overall	1991	0.652695	0.709578	0.756508
Northern America and Europe	Overall	1991	0.948609	0.968367	0.98169
Oceania excluding Australia and New Zealand	Overall	1991	0.0694022	0.11736	0.217633
Sub-Saharan Africa	Overall	1991	0.0758675	0.0958822	0.128647
Western Asia and Northern Africa	Overall	1991	0.627402	0.719019	0.790849
Australia and New Zealand	Overall	1992	1	1	1
Central Asia and Southern Asia	Overall	1992	0.124808	0.187818	0.270458
Eastern Asia and South-eastern Asia	Overall	1992	0.239346	0.401423	0.605562
Latin America & the Caribbean	Overall	1992	0.665678	0.720666	0.766287
Northern America and Europe	Overall	1992	0.950254	0.969456	0.981901
Oceania excluding Australia and New Zealand	Overall	1992	0.071096	0.118649	0.21033
Sub-Saharan Africa	Overall	1992	0.0768272	0.0951998	0.12403
Western Asia and Northern Africa	Overall	1992	0.643706	0.727766	0.797131
Australia and New Zealand	Overall	1993	1	1	1
Central Asia and Southern Asia	Overall	1993	0.132698	0.195169	0.282058
Eastern Asia and South-eastern Asia	Overall	1993	0.248196	0.404238	0.59201
Latin America & the Caribbean	Overall	1993	0.681651	0.732532	0.774934
Northern America and Europe	Overall	1993	0.951277	0.9706	0.982512
Oceania excluding Australia and New Zealand	Overall	1993	0.0722153	0.117837	0.207513
Sub-Saharan Africa	Overall	1993	0.0773386	0.0944472	0.120565
Western Asia and Northern Africa	Overall	1993	0.659828	0.738127	0.800571
Australia and New Zealand	Overall	1994	1	1	1
Central Asia and Southern Asia	Overall	1994	0.137545	0.203549	0.29234
Eastern Asia and South-eastern Asia	Overall	1994	0.255888	0.404803	0.57522
Latin America & the Caribbean	Overall	1994	0.692716	0.742341	0.782342
Northern America and Europe	Overall	1994	0.954846	0.97179	0.983343
Oceania excluding Australia and New Zealand	Overall	1994	0.0725477	0.117313	0.202783
Sub-Saharan Africa	Overall	1994	0.0785295	0.0942703	0.11717
Western Asia and Northern Africa	Overall	1994	0.670571	0.746836	0.805257
Australia and New Zealand	Overall	1995	1	1	1
Central Asia and Southern Asia	Overall	1995	0.145347	0.210833	0.305541
Eastern Asia and South-eastern Asia	Overall	1995	0.259889	0.406289	0.558325
Latin America & the Caribbean	Overall	1995	0.702447	0.752147	0.791473
Northern America and Europe	Overall	1995	0.956556	0.972857	0.983288
Oceania excluding Australia and New Zealand	Overall	1995	0.0739282	0.115851	0.195881
Sub-Saharan Africa	Overall	1995	0.0792815	0.0943131	0.11649
Western Asia and Northern Africa	Overall	1995	0.689301	0.758103	0.812348
Australia and New Zealand	Overall	1996	1	1	1
Central Asia and Southern Asia	Overall	1996	0.148964	0.220848	0.315354
Eastern Asia and South-eastern Asia	Overall	1996	0.263448	0.409614	0.552219
Latin America & the Caribbean	Overall	1996	0.713821	0.762506	0.79944
Northern America and Europe	Overall	1996	0.958113	0.974246	0.984388
Oceania excluding Australia and New Zealand	Overall	1996	0.0750251	0.116274	0.194233
Sub-Saharan Africa	Overall	1996	0.0799828	0.0939407	0.114965
Western Asia and Northern Africa	Overall	1996	0.703823	0.767759	0.818661
Australia and New Zealand	Overall	1997	1	1	1
Central Asia and Southern Asia	Overall	1997	0.156561	0.229669	0.328588
Eastern Asia and South-eastern Asia	Overall	1997	0.273928	0.412046	0.54422
Latin America & the Caribbean	Overall	1997	0.726488	0.772537	0.806987
Northern America and Europe	Overall	1997	0.961876	0.975318	0.9849
Oceania excluding Australia and New Zealand	Overall	1997	0.0746464	0.115174	0.191292
Sub-Saharan Africa	Overall	1997	0.0811732	0.0946992	0.113814
Western Asia and Northern Africa	Overall	1997	0.724312	0.779315	0.824612
Australia and New Zealand	Overall	1998	1	1	1
Central Asia and Southern Asia	Overall	1998	0.16312	0.242229	0.339041
Eastern Asia and South-eastern Asia	Overall	1998	0.283489	0.413797	0.538416
Latin America & the Caribbean	Overall	1998	0.735596	0.780871	0.81674
Northern America and Europe	Overall	1998	0.962692	0.976605	0.985166
Oceania excluding Australia and New Zealand	Overall	1998	0.0746639	0.114944	0.188783
Sub-Saharan Africa	Overall	1998	0.0819781	0.0950932	0.112083
Western Asia and Northern Africa	Overall	1998	0.740915	0.791594	0.833086
Australia and New Zealand	Overall	1999	1	1	1
Central Asia and Southern Asia	Overall	1999	0.169335	0.251478	0.352308
Eastern Asia and South-eastern Asia	Overall	1999	0.293778	0.417368	0.538233
Latin America & the Caribbean	Overall	1999	0.746237	0.789978	0.822586
Northern America and Europe	Overall	1999	0.964305	0.977877	0.98568
Oceania excluding Australia and New Zealand	Overall	1999	0.072523	0.113596	0.19011
Sub-Saharan Africa	Overall	1999	0.0828676	0.0961643	0.1123
Western Asia and Northern Africa	Overall	1999	0.760046	0.804636	0.840291
Australia and New Zealand	Overall	2000	1	1	1
Central Asia and Southern Asia	Overall	2000	0.176917	0.262567	0.373178
Eastern Asia and South-eastern Asia	Overall	2000	0.300948	0.423045	0.537502
Latin America & the Caribbean	Overall	2000	0.755958	0.798561	0.831497
Northern America and Europe	Overall	2000	0.966002	0.978952	0.986437
Oceania excluding Australia and New Zealand	Overall	2000	0.0723923	0.11401	0.19261
Sub-Saharan Africa	Overall	2000	0.0853013	0.097341	0.111926
Western Asia and Northern Africa	Overall	2000	0.772719	0.816694	0.849331
Australia and New Zealand	Overall	2001	1	1	1
Central Asia and Southern Asia	Overall	2001	0.184722	0.274477	0.379635
Eastern Asia and South-eastern Asia	Overall	2001	0.310229	0.43029	0.547784
Latin America & the Caribbean	Overall	2001	0.76271	0.806089	0.838794
Northern America and Europe	Overall	2001	0.965887	0.980407	0.98713
Oceania excluding Australia and New Zealand	Overall	2001	0.072711	0.113362	0.189342
Sub-Saharan Africa	Overall	2001	0.0872474	0.0986249	0.112679
Western Asia and Northern Africa	Overall	2001	0.790278	0.828273	0.858966
Australia and New Zealand	Overall	2002	1	1	1
Central Asia and Southern Asia	Overall	2002	0.19158	0.285402	0.397737
Eastern Asia and South-eastern Asia	Overall	2002	0.322671	0.43705	0.545097
Latin America & the Caribbean	Overall	2002	0.77119	0.812959	0.842914
Northern America and Europe	Overall	2002	0.966757	0.981609	0.987733
Oceania excluding Australia and New Zealand	Overall	2002	0.0701318	0.113403	0.190198
Sub-Saharan Africa	Overall	2002	0.0890852	0.10023	0.113926
Western Asia and Northern Africa	Overall	2002	0.80223	0.838632	0.866541
Australia and New Zealand	Overall	2003	1	1	1
Central Asia and Southern Asia	Overall	2003	0.195082	0.298635	0.410813
Eastern Asia and South-eastern Asia	Overall	2003	0.319961	0.445433	0.552864
Latin America & the Caribbean	Overall	2003	0.778139	0.819124	0.848992
Northern America and Europe	Overall	2003	0.967452	0.982546	0.988413
Oceania excluding Australia and New Zealand	Overall	2003	0.0698022	0.112804	0.192648
Sub-Saharan Africa	Overall	2003	0.0912466	0.102328	0.114929
Western Asia and Northern Africa	Overall	2003	0.815344	0.847762	0.873926
Australia and New Zealand	Overall	2004	1	1	1
Central Asia and Southern Asia	Overall	2004	0.205088	0.306049	0.426801
Eastern Asia and South-eastern Asia	Overall	2004	0.334567	0.455654	0.559599
Latin America & the Caribbean	Overall	2004	0.785689	0.82584	0.85395
Northern America and Europe	Overall	2004	0.966618	0.983376	0.988624
Oceania excluding Australia and New Zealand	Overall	2004	0.0701373	0.112337	0.191007
Sub-Saharan Africa	Overall	2004	0.0935676	0.104294	0.117153
Western Asia and Northern Africa	Overall	2004	0.826025	0.856833	0.880515
Australia and New Zealand	Overall	2005	1	1	1
Central Asia and Southern Asia	Overall	2005	0.211879	0.316088	0.439376
Eastern Asia and South-eastern Asia	Overall	2005	0.346418	0.465863	0.574703
Latin America & the Caribbean	Overall	2005	0.792898	0.83105	0.858969
Northern America and Europe	Overall	2005	0.966839	0.984098	0.989307
Oceania excluding Australia and New Zealand	Overall	2005	0.0672416	0.112356	0.193357
Sub-Saharan Africa	Overall	2005	0.0952827	0.106223	0.119173
Western Asia and Northern Africa	Overall	2005	0.835631	0.864095	0.887579
Australia and New Zealand	Overall	2006	1	1	1
Central Asia and Southern Asia	Overall	2006	0.21867	0.328912	0.455293
Eastern Asia and South-eastern Asia	Overall	2006	0.365872	0.479592	0.588459
Latin America & the Caribbean	Overall	2006	0.797749	0.837118	0.863308
Northern America and Europe	Overall	2006	0.965753	0.984442	0.98959
Oceania excluding Australia and New Zealand	Overall	2006	0.0680676	0.112929	0.186717
Sub-Saharan Africa	Overall	2006	0.0975953	0.10872	0.120918
Western Asia and Northern Africa	Overall	2006	0.845201	0.8717	0.893839
Australia and New Zealand	Overall	2007	1	1	1
Central Asia and Southern Asia	Overall	2007	0.226709	0.337627	0.467839
Eastern Asia and South-eastern Asia	Overall	2007	0.376479	0.492931	0.602002
Latin America & the Caribbean	Overall	2007	0.802202	0.841413	0.866991
Northern America and Europe	Overall	2007	0.963292	0.984677	0.989704
Oceania excluding Australia and New Zealand	Overall	2007	0.0686529	0.112579	0.192135
Sub-Saharan Africa	Overall	2007	0.100348	0.110659	0.123368
Western Asia and Northern Africa	Overall	2007	0.851295	0.877977	0.899534
Australia and New Zealand	Overall	2008	1	1	1
Central Asia and Southern Asia	Overall	2008	0.23497	0.345473	0.475725
Eastern Asia and South-eastern Asia	Overall	2008	0.392596	0.510546	0.623818
Latin America & the Caribbean	Overall	2008	0.809351	0.845573	0.87146
Northern America and Europe	Overall	2008	0.960935	0.984737	0.990153
Oceania excluding Australia and New Zealand	Overall	2008	0.0681506	0.112864	0.188864
Sub-Saharan Africa	Overall	2008	0.102281	0.112796	0.124712
Western Asia and Northern Africa	Overall	2008	0.858528	0.883973	0.90466
Australia and New Zealand	Overall	2009	1	1	1
Central Asia and Southern Asia	Overall	2009	0.243555	0.359324	0.490905
Eastern Asia and South-eastern Asia	Overall	2009	0.407653	0.524802	0.635737
Latin America & the Caribbean	Overall	2009	0.813931	0.849659	0.874477
Northern America and Europe	Overall	2009	0.958196	0.984282	0.990227
Oceania excluding Australia and New Zealand	Overall	2009	0.0676168	0.110328	0.194207
Sub-Saharan Africa	Overall	2009	0.104419	0.114867	0.127614
Western Asia and Northern Africa	Overall	2009	0.86469	0.889104	0.909509
Australia and New Zealand	Overall	2010	1	1	1
Central Asia and Southern Asia	Overall	2010	0.253147	0.369922	0.499455
Eastern Asia and South-eastern Asia	Overall	2010	0.425567	0.542187	0.654556
Latin America & the Caribbean	Overall	2010	0.82021	0.853112	0.878105
Northern America and Europe	Overall	2010	0.955548	0.983565	0.990159
Oceania excluding Australia and New Zealand	Overall	2010	0.0654666	0.112486	0.191645
Sub-Saharan Africa	Overall	2010	0.106101	0.117344	0.129788
Western Asia and Northern Africa	Overall	2010	0.870385	0.893531	0.913241
Australia and New Zealand	Overall	2011	1	1	1
Central Asia and Southern Asia	Overall	2011	0.260604	0.378285	0.517045
Eastern Asia and South-eastern Asia	Overall	2011	0.440159	0.559079	0.669925
Latin America & the Caribbean	Overall	2011	0.822865	0.856838	0.88045
Northern America and Europe	Overall	2011	0.952166	0.983068	0.989991
Oceania excluding Australia and New Zealand	Overall	2011	0.0642146	0.111518	0.194025
Sub-Saharan Africa	Overall	2011	0.108416	0.119559	0.132893
Western Asia and Northern Africa	Overall	2011	0.874025	0.897191	0.916497
Australia and New Zealand	Overall	2012	1	1	1
Central Asia and Southern Asia	Overall	2012	0.270835	0.39281	0.531766
Eastern Asia and South-eastern Asia	Overall	2012	0.451656	0.575795	0.686384
Latin America & the Caribbean	Overall	2012	0.826295	0.860781	0.883423
Northern America and Europe	Overall	2012	0.948621	0.981966	0.990037
Oceania excluding Australia and New Zealand	Overall	2012	0.0656172	0.11159	0.196491
Sub-Saharan Africa	Overall	2012	0.110667	0.122253	0.135328
Western Asia and Northern Africa	Overall	2012	0.876221	0.900534	0.919892
Australia and New Zealand	Overall	2013	1	1	1
Central Asia and Southern Asia	Overall	2013	0.278259	0.408491	0.543673
Eastern Asia and South-eastern Asia	Overall	2013	0.460485	0.593795	0.707453
Latin America & the Caribbean	Overall	2013	0.830807	0.8639	0.887141
Northern America and Europe	Overall	2013	0.942206	0.980802	0.989772
Oceania excluding Australia and New Zealand	Overall	2013	0.0620939	0.111169	0.203132
Sub-Saharan Africa	Overall	2013	0.113515	0.124999	0.138355
Western Asia and Northern Africa	Overall	2013	0.879971	0.90375	0.92387
Australia and New Zealand	Overall	2014	1	1	1
Central Asia and Southern Asia	Overall	2014	0.293159	0.422018	0.55784
Eastern Asia and South-eastern Asia	Overall	2014	0.479993	0.608718	0.722894
Latin America & the Caribbean	Overall	2014	0.835148	0.867599	0.889375
Northern America and Europe	Overall	2014	0.937382	0.979311	0.98944
Oceania excluding Australia and New Zealand	Overall	2014	0.0623907	0.110935	0.209477
Sub-Saharan Africa	Overall	2014	0.116484	0.128433	0.142809
Western Asia and Northern Africa	Overall	2014	0.88226	0.906504	0.926743
Australia and New Zealand	Overall	2015	1	1	1
Central Asia and Southern Asia	Overall	2015	0.303522	0.43528	0.574529
Eastern Asia and South-eastern Asia	Overall	2015	0.486328	0.622673	0.74103
Latin America & the Caribbean	Overall	2015	0.835927	0.870481	0.892988
Northern America and Europe	Overall	2015	0.931866	0.977927	0.989362
Oceania excluding Australia and New Zealand	Overall	2015	0.0602423	0.110626	0.216938
Sub-Saharan Africa	Overall	2015	0.119976	0.132505	0.147143
Western Asia and Northern Africa	Overall	2015	0.88457	0.908616	0.930211
Australia and New Zealand	Overall	2016	1	1	1
Central Asia and Southern Asia	Overall	2016	0.313837	0.454384	0.601083
Eastern Asia and South-eastern Asia	Overall	2016	0.499552	0.639621	0.759191
Latin America & the Caribbean	Overall	2016	0.841838	0.873082	0.89554
Northern America and Europe	Overall	2016	0.924288	0.976414	0.989015
Oceania excluding Australia and New Zealand	Overall	2016	0.0578585	0.111007	0.226876
Sub-Saharan Africa	Overall	2016	0.123415	0.136874	0.153283
Western Asia and Northern Africa	Overall	2016	0.885805	0.910645	0.932481
Australia and New Zealand	Overall	2017	1	1	1
Central Asia and Southern Asia	Overall	2017	0.327556	0.471406	0.619632
Eastern Asia and South-eastern Asia	Overall	2017	0.501867	0.652431	0.782596
Latin America & the Caribbean	Overall	2017	0.843018	0.875794	0.898357
Northern America and Europe	Overall	2017	0.917781	0.974229	0.989009
Oceania excluding Australia and New Zealand	Overall	2017	0.0566157	0.110659	0.234907
Sub-Saharan Africa	Overall	2017	0.127073	0.142235	0.159741
Western Asia and Northern Africa	Overall	2017	0.885296	0.912678	0.936082
Australia and New Zealand	Overall	2018	1	1	1
Central Asia and Southern Asia	Overall	2018	0.342733	0.487656	0.640906
Eastern Asia and South-eastern Asia	Overall	2018	0.50562	0.667157	0.799652
Latin America & the Caribbean	Overall	2018	0.84435	0.878054	0.900588
Northern America and Europe	Overall	2018	0.911359	0.972563	0.988441
Oceania excluding Australia and New Zealand	Overall	2018	0.0547713	0.111322	0.244975
Sub-Saharan Africa	Overall	2018	0.131299	0.147913	0.166541
Western Asia and Northern Africa	Overall	2018	0.885289	0.913973	0.938368
Australia and New Zealand	Overall	2019	1	1	1
Central Asia and Southern Asia	Overall	2019	0.351134	0.504927	0.660348
Eastern Asia and South-eastern Asia	Overall	2019	0.51296	0.68108	0.813055
Latin America & the Caribbean	Overall	2019	0.846079	0.879657	0.903326
Northern America and Europe	Overall	2019	0.906684	0.970153	0.988482
Oceania excluding Australia and New Zealand	Overall	2019	0.0540773	0.111703	0.263265
Sub-Saharan Africa	Overall	2019	0.135451	0.153417	0.174079
Western Asia and Northern Africa	Overall	2019	0.885812	0.915108	0.942962
Australia and New Zealand	Overall	2020	1	1	1
Central Asia and Southern Asia	Overall	2020	0.361564	0.523377	0.680337
Eastern Asia and South-eastern Asia	Overall	2020	0.509523	0.688509	0.832564
Latin America & the Caribbean	Overall	2020	0.845667	0.880947	0.905305
Northern America and Europe	Overall	2020	0.899012	0.968437	0.988158
Oceania excluding Australia and New Zealand	Overall	2020	0.0518195	0.110904	0.282187
Sub-Saharan Africa	Overall	2020	0.139315	0.158602	0.182379
Western Asia and Northern Africa	Overall	2020	0.884065	0.916029	0.944442
Australia and New Zealand	Overall	2021	1	1	1
Central Asia and Southern Asia	Overall	2021	0.369399	0.543921	0.706568
Eastern Asia and South-eastern Asia	Overall	2021	0.509774	0.704932	0.848605
Latin America & the Caribbean	Overall	2021	0.843199	0.881668	0.907514
Northern America and Europe	Overall	2021	0.894395	0.965661	0.987662
Oceania excluding Australia and New Zealand	Overall	2021	0.0499028	0.111324	0.29903
Sub-Saharan Africa	Overall	2021	0.141792	0.163404	0.187797
Western Asia and Northern Africa	Overall	2021	0.882661	0.916556	0.946186
Australia and New Zealand	Overall	2022	1	1	1
Central Asia and Southern Asia	Overall	2022	0.386038	0.564241	0.724405
Eastern Asia and South-eastern Asia	Overall	2022	0.50133	0.711198	0.85914
Latin America & the Caribbean	Overall	2022	0.841962	0.882442	0.909557
Northern America and Europe	Overall	2022	0.887705	0.963018	0.987557
Oceania excluding Australia and New Zealand	Overall	2022	0.0488751	0.112107	0.328338
Sub-Saharan Africa	Overall	2022	0.144383	0.168127	0.1954
Western Asia and Northern Africa	Overall	2022	0.88158	0.917314	0.948901
Australia and New Zealand	Overall	2023	1	1	1
Central Asia and Southern Asia	Overall	2023	0.389268	0.58208	0.756676
Eastern Asia and South-eastern Asia	Overall	2023	0.498881	0.723043	0.868499
Latin America & the Caribbean	Overall	2023	0.836412	0.882836	0.910579
Northern America and Europe	Overall	2023	0.88168	0.959719	0.986774
Oceania excluding Australia and New Zealand	Overall	2023	0.0471788	0.109599	0.347754
Sub-Saharan Africa	Overall	2023	0.146001	0.171424	0.201171
Western Asia and Northern Africa	Overall	2023	0.878776	0.916869	0.950569
Australia and New Zealand	Overall	2024	1	1	1
Central Asia and Southern Asia	Overall	2024	0.39624	0.602275	0.769963
Eastern Asia and South-eastern Asia	Overall	2024	0.49405	0.728601	0.878594
Latin America & the Caribbean	Overall	2024	0.833564	0.882344	0.911771
Northern America and Europe	Overall	2024	0.87748	0.95723	0.987263
Oceania excluding Australia and New Zealand	Overall	2024	0.0458835	0.111904	0.357264
Sub-Saharan Africa	Overall	2024	0.147133	0.17461	0.207789
Western Asia and Northern Africa	Overall	2024	0.876169	0.917125	0.951298
Australia and New Zealand	Overall	2025	1	1	1
Central Asia and Southern Asia	Overall	2025	0.404071	0.618952	0.788889
Eastern Asia and South-eastern Asia	Overall	2025	0.487936	0.735972	0.887831
Latin America & the Caribbean	Overall	2025	0.829378	0.88153	0.91326
Northern America and Europe	Overall	2025	0.873953	0.953945	0.98613
Oceania excluding Australia and New Zealand	Overall	2025	0.0432916	0.112216	0.389916
Sub-Saharan Africa	Overall	2025	0.148336	0.177635	0.213916
Western Asia and Northern Africa	Overall	2025	0.871304	0.916943	0.952399
Australia and New Zealand	Overall	2026	1	1	1
Central Asia and Southern Asia	Overall	2026	0.424561	0.639267	0.810093
Eastern Asia and South-eastern Asia	Overall	2026	0.47806	0.744886	0.894403
Latin America & the Caribbean	Overall	2026	0.821976	0.881321	0.914313
Northern America and Europe	Overall	2026	0.868903	0.951144	0.986303
Oceania excluding Australia and New Zealand	Overall	2026	0.0416378	0.113047	0.421
Sub-Saharan Africa	Overall	2026	0.149096	0.180189	0.217729
Western Asia and Northern Africa	Overall	2026	0.867738	0.916684	0.953214
Australia and New Zealand	Overall	2027	1	1	1
Central Asia and Southern Asia	Overall	2027	0.425666	0.653707	0.824785
Eastern Asia and South-eastern Asia	Overall	2027	0.478967	0.752888	0.902521
Latin America & the Caribbean	Overall	2027	0.812224	0.879326	0.91474
Northern America and Europe	Overall	2027	0.866426	0.947755	0.986135
Oceania excluding Australia and New Zealand	Overall	2027	0.0416106	0.11424	0.444135
Sub-Saharan Africa	Overall	2027	0.151441	0.182341	0.223093
Western Asia and Northern Africa	Overall	2027	0.862566	0.914703	0.954197
Australia and New Zealand	Overall	2028	1	1	1
Central Asia and Southern Asia	Overall	2028	0.434043	0.667527	0.837505
Eastern Asia and South-eastern Asia	Overall	2028	0.469402	0.756552	0.907861
Latin America & the Caribbean	Overall	2028	0.803749	0.87778	0.9151
Northern America and Europe	Overall	2028	0.862797	0.945078	0.98539
Oceania excluding Australia and New Zealand	Overall	2028	0.0396811	0.112655	0.468238
Sub-Saharan Africa	Overall	2028	0.151422	0.185196	0.228788
Western Asia and Northern Africa	Overall	2028	0.858415	0.913981	0.954708
Australia and New Zealand	Overall	2029	1	1	1
Central Asia and Southern Asia	Overall	2029	0.437724	0.685837	0.853677
Eastern Asia and South-eastern Asia	Overall	2029	0.456479	0.760085	0.912748
Latin America & the Caribbean	Overall	2029	0.796154	0.875675	0.916735
Northern America and Europe	Overall	2029	0.863098	0.940801	0.984942
Oceania excluding Australia and New Zealand	Overall	2029	0.0387877	0.112637	0.481302
Sub-Saharan Africa	Overall	2029	0.150052	0.187233	0.233043
Western Asia and Northern Africa	Overall	2029	0.851662	0.912399	0.954505
Australia and New Zealand	Overall	2030	1	1	1
Central Asia and Southern Asia	Overall	2030	0.449922	0.702648	0.863256
Eastern Asia and South-eastern Asia	Overall	2030	0.449258	0.767413	0.916822
Latin America & the Caribbean	Overall	2030	0.791108	0.872328	0.916782
Northern America and Europe	Overall	2030	0.860489	0.937401	0.98491
Oceania excluding Australia and New Zealand	Overall	2030	0.0372375	0.113916	0.502269
Sub-Saharan Africa	Overall	2030	0.152261	0.189088	0.238288
Western Asia and Northern Africa	Overall	2030	0.84625	0.910222	0.955481
World	Urban	1990	0.674903	0.742123	0.789413
World	Urban	1991	0.677758	0.743347	0.789328
World	Urban	1992	0.684236	0.7449	0.788402
World	Urban	1993	0.688147	0.746034	0.789239
World	Urban	1994	0.692699	0.747363	0.78958
World	Urban	1995	0.698914	0.749339	0.790274
World	Urban	1996	0.703688	0.751018	0.789758
World	Urban	1997	0.708327	0.753411	0.791768
World	Urban	1998	0.715208	0.755626	0.793007
World	Urban	1999	0.720854	0.759067	0.794721
World	Urban	2000	0.724574	0.761778	0.798116
World	Urban	2001	0.729246	0.764993	0.798922
World	Urban	2002	0.73356	0.768131	0.801925
World	Urban	2003	0.73562	0.772036	0.80582
World	Urban	2004	0.739568	0.775672	0.810207
World	Urban	2005	0.742127	0.779883	0.812402
World	Urban	2006	0.747608	0.784861	0.818219
World	Urban	2007	0.75052	0.79054	0.823252
World	Urban	2008	0.755745	0.795122	0.827845
World	Urban	2009	0.761346	0.800265	0.833216
World	Urban	2010	0.763646	0.805763	0.83763
World	Urban	2011	0.767285	0.810027	0.841338
World	Urban	2012	0.767485	0.81395	0.845782
World	Urban	2013	0.772687	0.817613	0.850364
World	Urban	2014	0.773887	0.821316	0.853724
World	Urban	2015	0.77244	0.823904	0.856919
World	Urban	2016	0.767796	0.82655	0.860906
World	Urban	2017	0.765994	0.829709	0.865839
World	Urban	2018	0.763577	0.831943	0.869374
World	Urban	2019	0.757376	0.833184	0.872142
World	Urban	2020	0.754021	0.834785	0.875121
World	Urban	2021	0.745542	0.835748	0.876048
World	Urban	2022	0.736443	0.835156	0.876327
World	Urban	2023	0.728297	0.83505	0.877503
World	Urban	2024	0.725061	0.834681	0.876761
World	Urban	2025	0.716286	0.83327	0.877245
World	Urban	2026	0.708668	0.830736	0.876106
World	Urban	2027	0.699858	0.830259	0.874535
World	Urban	2028	0.693012	0.82785	0.872508
World	Urban	2029	0.683864	0.825034	0.872302
World	Urban	2030	0.677647	0.822414	0.869836
World	Rural	1990	0.173354	0.253983	0.4026
World	Rural	1991	0.174853	0.251594	0.388344
World	Rural	1992	0.176688	0.251295	0.377607
World	Rural	1993	0.17924	0.251263	0.369837
World	Rural	1994	0.180592	0.24848	0.357782
World	Rural	1995	0.185293	0.248163	0.347119
World	Rural	1996	0.189626	0.247786	0.343046
World	Rural	1997	0.192965	0.248851	0.338973
World	Rural	1998	0.196519	0.248104	0.33208
World	Rural	1999	0.199354	0.249044	0.328482
World	Rural	2000	0.203518	0.25035	0.326395
World	Rural	2001	0.206044	0.251927	0.321842
World	Rural	2002	0.210063	0.254157	0.327984
World	Rural	2003	0.213665	0.255584	0.320982
World	Rural	2004	0.217427	0.258968	0.320006
World	Rural	2005	0.221521	0.262404	0.327908
World	Rural	2006	0.224421	0.266084	0.326589
World	Rural	2007	0.229221	0.270061	0.328447
World	Rural	2008	0.23389	0.27531	0.332805
World	Rural	2009	0.237807	0.281118	0.340301
World	Rural	2010	0.244993	0.287963	0.345275
World	Rural	2011	0.249201	0.295041	0.351979
World	Rural	2012	0.255933	0.302981	0.360147
World	Rural	2013	0.262486	0.310734	0.369712
World	Rural	2014	0.268638	0.321606	0.384138
World	Rural	2015	0.277107	0.331032	0.396453
World	Rural	2016	0.285191	0.342429	0.413896
World	Rural	2017	0.291647	0.353362	0.428043
World	Rural	2018	0.295928	0.366062	0.445274
World	Rural	2019	0.301885	0.377068	0.467867
World	Rural	2020	0.30672	0.38868	0.483794
World	Rural	2021	0.312638	0.400294	0.503796
World	Rural	2022	0.316635	0.414334	0.519843
World	Rural	2023	0.323979	0.426533	0.537807
World	Rural	2024	0.328409	0.437325	0.554337
World	Rural	2025	0.332898	0.449012	0.567302
World	Rural	2026	0.333346	0.460259	0.58417
World	Rural	2027	0.339006	0.471533	0.59601
World	Rural	2028	0.341418	0.481863	0.60813
World	Rural	2029	0.347694	0.490901	0.616853
World	Rural	2030	0.349329	0.501104	0.62562
World	Overall	1990	0.402764	0.469184	0.552431
World	Overall	1991	0.405423	0.471862	0.549148
World	Overall	1992	0.413504	0.472576	0.54307
World	Overall	1993	0.417234	0.475343	0.542607
World	Overall	1994	0.42298	0.477222	0.539258
World	Overall	1995	0.425614	0.479487	0.535293
World	Overall	1996	0.430164	0.482907	0.536254
World	Overall	1997	0.435623	0.486423	0.537222
World	Overall	1998	0.442992	0.490505	0.538158
World	Overall	1999	0.445529	0.494248	0.540791
World	Overall	2000	0.451334	0.498545	0.546388
World	Overall	2001	0.459455	0.503906	0.550738
World	Overall	2002	0.464577	0.509614	0.554782
World	Overall	2003	0.467968	0.514799	0.559976
World	Overall	2004	0.473871	0.520537	0.565778
World	Overall	2005	0.47923	0.526671	0.573382
World	Overall	2006	0.488604	0.533426	0.580975
World	Overall	2007	0.494181	0.540793	0.587833
World	Overall	2008	0.5019	0.548518	0.596956
World	Overall	2009	0.508221	0.5556	0.602928
World	Overall	2010	0.515321	0.563104	0.611574
World	Overall	2011	0.520326	0.569624	0.618301
World	Overall	2012	0.526854	0.57825	0.626518
World	Overall	2013	0.535361	0.586901	0.634817
World	Overall	2014	0.541421	0.594607	0.645773
World	Overall	2015	0.547475	0.601164	0.652594
World	Overall	2016	0.552615	0.610241	0.662128
World	Overall	2017	0.560112	0.617552	0.671962
World	Overall	2018	0.563227	0.626627	0.682892
World	Overall	2019	0.56977	0.633858	0.69155
World	Overall	2020	0.571817	0.639303	0.700081
World	Overall	2021	0.575719	0.647435	0.711678
World	Overall	2022	0.576495	0.654348	0.716778
World	Overall	2023	0.580492	0.660265	0.727112
World	Overall	2024	0.581166	0.664947	0.731487
World	Overall	2025	0.58038	0.670178	0.735715
World	Overall	2026	0.58553	0.674789	0.744482
World	Overall	2027	0.584017	0.678413	0.749337
World	Overall	2028	0.583609	0.681229	0.755698
World	Overall	2029	0.581865	0.684495	0.756822
World	Overall	2030	0.586023	0.686961	0.760327

## Sheet: Clean (Population)
region	area	year	population_lower95	population_median	population_upper95
Australia and New Zealand	Urban	1990	17438.7	17438.7	17438.7
Central Asia and Southern Asia	Urban	1990	114211	142915	172846
Eastern Asia and South-eastern Asia	Urban	1990	232869	380504	472345
Latin America & the Caribbean	Urban	1990	248311	265673	277193
Northern America and Europe	Urban	1990	683516	700849	706716
Oceania excluding Australia and New Zealand	Urban	1990	194.099	413.996	783.448
Sub-Saharan Africa	Urban	1990	26896.1	33884.5	44777
Western Asia and Northern Africa	Urban	1990	110482	129226	138238
Australia and New Zealand	Urban	1991	17678.2	17678.2	17678.2
Central Asia and Southern Asia	Urban	1991	122649	151389	181517
Eastern Asia and South-eastern Asia	Urban	1991	245924	393291	487775
Latin America & the Caribbean	Urban	1991	259091	275171	285625
Northern America and Europe	Urban	1991	691160	706588	712172
Oceania excluding Australia and New Zealand	Urban	1991	214.087	430.71	789.316
Sub-Saharan Africa	Urban	1991	28321.3	35331.1	45737.4
Western Asia and Northern Africa	Urban	1991	115986	134371	142865
Australia and New Zealand	Urban	1992	17894.2	17894.2	17894.2
Central Asia and Southern Asia	Urban	1992	132614	161073	191323
Eastern Asia and South-eastern Asia	Urban	1992	265642	405644	500833
Latin America & the Caribbean	Urban	1992	269524	284413	294347
Northern America and Europe	Urban	1992	698289	712290	717405
Oceania excluding Australia and New Zealand	Urban	1992	228.305	444.11	794.061
Sub-Saharan Africa	Urban	1992	29902.1	36658.9	46524.5
Western Asia and Northern Africa	Urban	1992	122461	139351	147104
Australia and New Zealand	Urban	1993	18101	18101	18101
Central Asia and Southern Asia	Urban	1993	142248	171089	200534
Eastern Asia and South-eastern Asia	Urban	1993	284124	420048	514093
Latin America & the Caribbean	Urban	1993	278722	293778	302625
Northern America and Europe	Urban	1993	704772	717719	722434
Oceania excluding Australia and New Zealand	Urban	1993	246.393	466.951	804.814
Sub-Saharan Africa	Urban	1993	31741	38134	47311.6
Western Asia and Northern Africa	Urban	1993	129472	144366	151445
Australia and New Zealand	Urban	1994	18299.8	18299.8	18299.8
Central Asia and Southern Asia	Urban	1994	151803	181265	211464
Eastern Asia and South-eastern Asia	Urban	1994	305653	433858	530183
Latin America & the Caribbean	Urban	1994	288990	302851	311388
Northern America and Europe	Urban	1994	711363	723154	727706
Oceania excluding Australia and New Zealand	Urban	1994	258.828	482.244	809.884
Sub-Saharan Africa	Urban	1994	33383.6	39608.2	47966.5
Western Asia and Northern Africa	Urban	1994	135195	149230	155949
Australia and New Zealand	Urban	1995	18490.9	18490.9	18490.9
Central Asia and Southern Asia	Urban	1995	161392	192370	222804
Eastern Asia and South-eastern Asia	Urban	1995	329713	449741	544512
Latin America & the Caribbean	Urban	1995	296997	311863	320215
Northern America and Europe	Urban	1995	717956	728338	732466
Oceania excluding Australia and New Zealand	Urban	1995	274.624	500.625	824.579
Sub-Saharan Africa	Urban	1995	34857.2	41084.3	49342.9
Western Asia and Northern Africa	Urban	1995	140921	153777	160048
Australia and New Zealand	Urban	1996	18674.2	18674.2	18674.2
Central Asia and Southern Asia	Urban	1996	173003	203619	235464
Eastern Asia and South-eastern Asia	Urban	1996	347102	463521	556959
Latin America & the Caribbean	Urban	1996	308234	321130	328813
Northern America and Europe	Urban	1996	723417	733380	737306
Oceania excluding Australia and New Zealand	Urban	1996	293.702	519.137	829.985
Sub-Saharan Africa	Urban	1996	36842	42794.4	50513.6
Western Asia and Northern Africa	Urban	1996	146486	158542	164128
Australia and New Zealand	Urban	1997	18849	18849	18849
Central Asia and Southern Asia	Urban	1997	184693	215730	248340
Eastern Asia and South-eastern Asia	Urban	1997	368663	479890	576774
Latin America & the Caribbean	Urban	1997	316720	330186	337507
Northern America and Europe	Urban	1997	729894	738406	741981
Oceania excluding Australia and New Zealand	Urban	1997	308.779	536.03	842.893
Sub-Saharan Africa	Urban	1997	38435.3	44301.2	51701.6
Western Asia and Northern Africa	Urban	1997	152368	163327	168562
Australia and New Zealand	Urban	1998	19021.5	19021.5	19021.5
Central Asia and Southern Asia	Urban	1998	195132	229318	261142
Eastern Asia and South-eastern Asia	Urban	1998	391420	496319	587633
Latin America & the Caribbean	Urban	1998	325573	338915	346274
Northern America and Europe	Urban	1998	735561	743316	746635
Oceania excluding Australia and New Zealand	Urban	1998	326.441	549.278	851.131
Sub-Saharan Africa	Urban	1998	40266.9	46126.6	53003.8
Western Asia and Northern Africa	Urban	1998	158759	168294	173175
Australia and New Zealand	Urban	1999	19196.9	19196.9	19196.9
Central Asia and Southern Asia	Urban	1999	209388	243000	276156
Eastern Asia and South-eastern Asia	Urban	1999	413612	513201	607798
Latin America & the Caribbean	Urban	1999	334700	348160	354934
Northern America and Europe	Urban	1999	740511	748220	751146
Oceania excluding Australia and New Zealand	Urban	1999	336.853	561.297	860.054
Sub-Saharan Africa	Urban	1999	42139.5	47984.2	54515.3
Western Asia and Northern Africa	Urban	1999	164179	173317	177780
Australia and New Zealand	Urban	2000	19379.6	19379.6	19379.6
Central Asia and Southern Asia	Urban	2000	223027	257543	290817
Eastern Asia and South-eastern Asia	Urban	2000	433670	531240	625035
Latin America & the Caribbean	Urban	2000	343018	356820	363379
Northern America and Europe	Urban	2000	745565	752978	755688
Oceania excluding Australia and New Zealand	Urban	2000	354.419	582.89	863.29
Sub-Saharan Africa	Urban	2000	44192	49971.3	56264.5
Western Asia and Northern Africa	Urban	2000	170730	178400	182529
Australia and New Zealand	Urban	2001	19569.6	19569.6	19569.6
Central Asia and Southern Asia	Urban	2001	235611	272205	305982
Eastern Asia and South-eastern Asia	Urban	2001	454608	555756	642482
Latin America & the Caribbean	Urban	2001	351481	364965	371347
Northern America and Europe	Urban	2001	750416	757424	759963
Oceania excluding Australia and New Zealand	Urban	2001	371.761	599.61	889.798
Sub-Saharan Africa	Urban	2001	46320.9	52194.7	58358.8
Western Asia and Northern Africa	Urban	2001	176793	183730	187416
Australia and New Zealand	Urban	2002	19817.1	19817.1	19817.1
Central Asia and Southern Asia	Urban	2002	251087	287719	323148
Eastern Asia and South-eastern Asia	Urban	2002	482576	581638	670922
Latin America & the Caribbean	Urban	2002	359240	372840	379244
Northern America and Europe	Urban	2002	754169	762052	764418
Oceania excluding Australia and New Zealand	Urban	2002	387.354	616.579	894.322
Sub-Saharan Africa	Urban	2002	48739.3	54550.5	60635.8
Western Asia and Northern Africa	Urban	2002	182850	188980	192572
Australia and New Zealand	Urban	2003	20080.8	20080.8	20080.8
Central Asia and Southern Asia	Urban	2003	266675	303908	341016
Eastern Asia and South-eastern Asia	Urban	2003	503938	607959	704418
Latin America & the Caribbean	Urban	2003	366949	380204	386660
Northern America and Europe	Urban	2003	757794	766842	769163
Oceania excluding Australia and New Zealand	Urban	2003	406.553	635.306	902.493
Sub-Saharan Africa	Urban	2003	50952.8	57072.7	62919.2
Western Asia and Northern Africa	Urban	2003	188597	194462	197895
Australia and New Zealand	Urban	2004	20369.6	20369.6	20369.6
Central Asia and Southern Asia	Urban	2004	280096	320139	357628
Eastern Asia and South-eastern Asia	Urban	2004	531802	637843	736593
Latin America & the Caribbean	Urban	2004	374961	387934	394185
Northern America and Europe	Urban	2004	762262	771819	774004
Oceania excluding Australia and New Zealand	Urban	2004	429.43	651.363	906.05
Sub-Saharan Africa	Urban	2004	53930	59815.3	65795.1
Western Asia and Northern Africa	Urban	2004	194817	200197	203355
Australia and New Zealand	Urban	2005	20688.9	20688.9	20688.9
Central Asia and Southern Asia	Urban	2005	292809	335831	375407
Eastern Asia and South-eastern Asia	Urban	2005	558739	669149	764063
Latin America & the Caribbean	Urban	2005	381939	395226	401494
Northern America and Europe	Urban	2005	766770	777006	779114
Oceania excluding Australia and New Zealand	Urban	2005	449.73	672.548	919.215
Sub-Saharan Africa	Urban	2005	56525.9	62711.3	68611.8
Western Asia and Northern Africa	Urban	2005	201638	206416	209555
Australia and New Zealand	Urban	2006	21042.5	21042.5	21042.5
Central Asia and Southern Asia	Urban	2006	311599	352274	392850
Eastern Asia and South-eastern Asia	Urban	2006	589140	701582	801990
Latin America & the Caribbean	Urban	2006	388838	402698	408817
Northern America and Europe	Urban	2006	770143	782249	784530
Oceania excluding Australia and New Zealand	Urban	2006	478.609	689.425	941.939
Sub-Saharan Africa	Urban	2006	59540.7	65711.8	71467.5
Western Asia and Northern Africa	Urban	2006	208430	212999	215928
Australia and New Zealand	Urban	2007	21422.3	21422.3	21422.3
Central Asia and Southern Asia	Urban	2007	326189	370551	411691
Eastern Asia and South-eastern Asia	Urban	2007	618914	738373	837474
Latin America & the Caribbean	Urban	2007	396624	410032	416073
Northern America and Europe	Urban	2007	774326	787817	790130
Oceania excluding Australia and New Zealand	Urban	2007	501.889	706.645	945.853
Sub-Saharan Africa	Urban	2007	62880.1	68869.5	74770.4
Western Asia and Northern Africa	Urban	2007	215328	219892	222787
Australia and New Zealand	Urban	2008	21820.3	21820.3	21820.3
Central Asia and Southern Asia	Urban	2008	341344	387916	429232
Eastern Asia and South-eastern Asia	Urban	2008	649539	774611	875881
Latin America & the Caribbean	Urban	2008	404183	417429	423447
Northern America and Europe	Urban	2008	778280	793272	795847
Oceania excluding Australia and New Zealand	Urban	2008	509.881	720.111	968.1
Sub-Saharan Africa	Urban	2008	66018.3	72237.5	78088
Western Asia and Northern Africa	Urban	2008	222361	226959	229806
Australia and New Zealand	Urban	2009	22219.5	22219.5	22219.5
Central Asia and Southern Asia	Urban	2009	355295	405103	447804
Eastern Asia and South-eastern Asia	Urban	2009	684014	813086	912257
Latin America & the Caribbean	Urban	2009	411725	424427	430577
Northern America and Europe	Urban	2009	781226	798505	801397
Oceania excluding Australia and New Zealand	Urban	2009	527.243	741.675	989.169
Sub-Saharan Africa	Urban	2009	69232.9	75775.6	81974.4
Western Asia and Northern Africa	Urban	2009	229679	234077	236878
Australia and New Zealand	Urban	2010	22607.5	22607.5	22607.5
Central Asia and Southern Asia	Urban	2010	373571	422864	465461
Eastern Asia and South-eastern Asia	Urban	2010	720517	851565	955716
Latin America & the Caribbean	Urban	2010	419048	431544	437612
Northern America and Europe	Urban	2010	783050	803480	806672
Oceania excluding Australia and New Zealand	Urban	2010	536.991	757.485	1034.6
Sub-Saharan Africa	Urban	2010	73278.1	79783.6	86272.8
Western Asia and Northern Africa	Urban	2010	236709	241240	244060
Australia and New Zealand	Urban	2011	22979.6	22979.6	22979.6
Central Asia and Southern Asia	Urban	2011	388791	440980	487107
Eastern Asia and South-eastern Asia	Urban	2011	743998	888915	989747
Latin America & the Caribbean	Urban	2011	425505	438509	444786
Northern America and Europe	Urban	2011	785625	807935	811598
Oceania excluding Australia and New Zealand	Urban	2011	532.872	770.066	1048.84
Sub-Saharan Africa	Urban	2011	77052.4	83875	90474.7
Western Asia and Northern Africa	Urban	2011	243442	248030	250946
Australia and New Zealand	Urban	2012	23339.6	23339.6	23339.6
Central Asia and Southern Asia	Urban	2012	404206	459504	505957
Eastern Asia and South-eastern Asia	Urban	2012	763863	923587	1.03301e+06
Latin America & the Caribbean	Urban	2012	432971	445250	451700
Northern America and Europe	Urban	2012	784872	811949	816323
Oceania excluding Australia and New Zealand	Urban	2012	527.429	786.312	1078.86
Sub-Saharan Africa	Urban	2012	81440.2	88540.3	95507.7
Western Asia and Northern Africa	Urban	2012	250104	254860	257813
Australia and New Zealand	Urban	2013	23689.4	23689.4	23689.4
Central Asia and Southern Asia	Urban	2013	421356	478679	525062
Eastern Asia and South-eastern Asia	Urban	2013	796363	959123	1.071e+06
Latin America & the Caribbean	Urban	2013	439600	452047	458684
Northern America and Europe	Urban	2013	785530	815837	820653
Oceania excluding Australia and New Zealand	Urban	2013	525.838	790.385	1125.14
Sub-Saharan Africa	Urban	2013	86344.4	93677.6	101027
Western Asia and Northern Africa	Urban	2013	256667	261508	264562
Australia and New Zealand	Urban	2014	24034.9	24034.9	24034.9
Central Asia and Southern Asia	Urban	2014	440967	499050	544529
Eastern Asia and South-eastern Asia	Urban	2014	811762	993227	1.10734e+06
Latin America & the Caribbean	Urban	2014	445668	458696	465318
Northern America and Europe	Urban	2014	784939	819348	825104
Oceania excluding Australia and New Zealand	Urban	2014	516.418	804.998	1164.89
Sub-Saharan Africa	Urban	2014	91734	99711.6	108205
Western Asia and Northern Africa	Urban	2014	263314	268312	271397
Australia and New Zealand	Urban	2015	24380.7	24380.7	24380.7
Central Asia and Southern Asia	Urban	2015	457360	518600	565640
Eastern Asia and South-eastern Asia	Urban	2015	825678	1.02559e+06	1.14095e+06
Latin America & the Caribbean	Urban	2015	451589	465205	472418
Northern America and Europe	Urban	2015	782863	823047	829490
Oceania excluding Australia and New Zealand	Urban	2015	502.361	817.309	1208.59
Sub-Saharan Africa	Urban	2015	97993	106430	115333
Western Asia and Northern Africa	Urban	2015	269875	275064	278502
Australia and New Zealand	Urban	2016	24727	24727	24727
Central Asia and Southern Asia	Urban	2016	464764	539163	590130
Eastern Asia and South-eastern Asia	Urban	2016	835312	1.05528e+06	1.1785e+06
Latin America & the Caribbean	Urban	2016	457363	471492	478642
Northern America and Europe	Urban	2016	784148	826515	834163
Oceania excluding Australia and New Zealand	Urban	2016	492.497	826.787	1258.69
Sub-Saharan Africa	Urban	2016	104700	114360	124114
Western Asia and Northern Africa	Urban	2016	276204	281948	285526
Australia and New Zealand	Urban	2017	25072.8	25072.8	25072.8
Central Asia and Southern Asia	Urban	2017	483134	559353	611433
Eastern Asia and South-eastern Asia	Urban	2017	835676	1.08946e+06	1.21571e+06
Latin America & the Caribbean	Urban	2017	464109	477801	485619
Northern America and Europe	Urban	2017	779368	830331	838747
Oceania excluding Australia and New Zealand	Urban	2017	471.296	834.448	1319.2
Sub-Saharan Africa	Urban	2017	111446	122379	134037
Western Asia and Northern Africa	Urban	2017	282760	288605	292568
Australia and New Zealand	Urban	2018	25417.2	25417.2	25417.2
Central Asia and Southern Asia	Urban	2018	494382	579778	633891
Eastern Asia and South-eastern Asia	Urban	2018	843714	1.12059e+06	1.24877e+06
Latin America & the Caribbean	Urban	2018	468760	483993	491991
Northern America and Europe	Urban	2018	774907	833862	843545
Oceania excluding Australia and New Zealand	Urban	2018	460.795	853.301	1368.91
Sub-Saharan Africa	Urban	2018	119320	131849	144721
Western Asia and Northern Africa	Urban	2018	288634	295164	299483
Australia and New Zealand	Urban	2019	25758.4	25758.4	25758.4
Central Asia and Southern Asia	Urban	2019	507287	600506	656085
Eastern Asia and South-eastern Asia	Urban	2019	838855	1.14819e+06	1.28243e+06
Latin America & the Caribbean	Urban	2019	472467	489693	498864
Northern America and Europe	Urban	2019	772945	837443	848304
Oceania excluding Australia and New Zealand	Urban	2019	439.758	852.673	1418.09
Sub-Saharan Africa	Urban	2019	126885	141264	156882
Western Asia and Northern Africa	Urban	2019	294677	301647	306390
Australia and New Zealand	Urban	2020	26095.1	26095.1	26095.1
Central Asia and Southern Asia	Urban	2020	515839	620546	678943
Eastern Asia and South-eastern Asia	Urban	2020	827643	1.17787e+06	1.31527e+06
Latin America & the Caribbean	Urban	2020	477105	495246	504777
Northern America and Europe	Urban	2020	772837	840438	852852
Oceania excluding Australia and New Zealand	Urban	2020	427.704	862.661	1463.16
Sub-Saharan Africa	Urban	2020	133654	150885	169475
Western Asia and Northern Africa	Urban	2020	300401	307980	313105
Australia and New Zealand	Urban	2021	26427	26427	26427
Central Asia and Southern Asia	Urban	2021	526218	641738	700761
Eastern Asia and South-eastern Asia	Urban	2021	809065	1.20554e+06	1.34419e+06
Latin America & the Caribbean	Urban	2021	480440	500374	511132
Northern America and Europe	Urban	2021	770621	844010	857606
Oceania excluding Australia and New Zealand	Urban	2021	405.327	871.49	1537.45
Sub-Saharan Africa	Urban	2021	140490	159659	180537
Western Asia and Northern Africa	Urban	2021	305270	314334	320001
Australia and New Zealand	Urban	2022	26754.7	26754.7	26754.7
Central Asia and Southern Asia	Urban	2022	538991	661942	722312
Eastern Asia and South-eastern Asia	Urban	2022	793750	1.23222e+06	1.3715e+06
Latin America & the Caribbean	Urban	2022	483285	505566	517806
Northern America and Europe	Urban	2022	770119	846340	862040
Oceania excluding Australia and New Zealand	Urban	2022	397.174	876.511	1588.66
Sub-Saharan Africa	Urban	2022	147179	168464	192860
Western Asia and Northern Africa	Urban	2022	310631	320359	326682
Australia and New Zealand	Urban	2023	27079.1	27079.1	27079.1
Central Asia and Southern Asia	Urban	2023	547516	682318	744306
Eastern Asia and South-eastern Asia	Urban	2023	775185	1.25833e+06	1.39827e+06
Latin America & the Caribbean	Urban	2023	485838	509992	523156
Northern America and Europe	Urban	2023	767545	848385	866674
Oceania excluding Australia and New Zealand	Urban	2023	376.342	880.479	1642.47
Sub-Saharan Africa	Urban	2023	152050	176572	203205
Western Asia and Northern Africa	Urban	2023	314992	326528	333246
Australia and New Zealand	Urban	2024	27401.8	27401.8	27401.8
Central Asia and Southern Asia	Urban	2024	555277	703183	765985
Eastern Asia and South-eastern Asia	Urban	2024	778150	1.28297e+06	1.42343e+06
Latin America & the Caribbean	Urban	2024	486427	514720	529425
Northern America and Europe	Urban	2024	769461	850773	871112
Oceania excluding Australia and New Zealand	Urban	2024	368.86	884.27	1703.12
Sub-Saharan Africa	Urban	2024	157783	184500	215604
Western Asia and Northern Africa	Urban	2024	319267	332493	339832
Australia and New Zealand	Urban	2025	27723.7	27723.7	27723.7
Central Asia and Southern Asia	Urban	2025	560938	724573	786413
Eastern Asia and South-eastern Asia	Urban	2025	747955	1.30592e+06	1.44785e+06
Latin America & the Caribbean	Urban	2025	486384	518807	534765
Northern America and Europe	Urban	2025	771305	852527	875521
Oceania excluding Australia and New Zealand	Urban	2025	341.687	883.081	1754.04
Sub-Saharan Africa	Urban	2025	161235	191800	226203
Western Asia and Northern Africa	Urban	2025	324019	338351	346295
Australia and New Zealand	Urban	2026	28045.2	28045.2	28045.2
Central Asia and Southern Asia	Urban	2026	568574	743821	808289
Eastern Asia and South-eastern Asia	Urban	2026	738379	1.32318e+06	1.46932e+06
Latin America & the Caribbean	Urban	2026	486777	522675	540789
Northern America and Europe	Urban	2026	772904	854917	880123
Oceania excluding Australia and New Zealand	Urban	2026	334.203	892.436	1819.54
Sub-Saharan Africa	Urban	2026	165066	198756	236025
Western Asia and Northern Africa	Urban	2026	327564	344146	352982
Australia and New Zealand	Urban	2027	28366	28366	28366
Central Asia and Southern Asia	Urban	2027	572523	762232	829726
Eastern Asia and South-eastern Asia	Urban	2027	723188	1.34838e+06	1.49171e+06
Latin America & the Caribbean	Urban	2027	483970	526575	546016
Northern America and Europe	Urban	2027	776051	856908	884589
Oceania excluding Australia and New Zealand	Urban	2027	312.75	887.608	1884.04
Sub-Saharan Africa	Urban	2027	169131	204997	246382
Western Asia and Northern Africa	Urban	2027	330063	349879	359657
Australia and New Zealand	Urban	2028	28685.7	28685.7	28685.7
Central Asia and Southern Asia	Urban	2028	579601	783674	850888
Eastern Asia and South-eastern Asia	Urban	2028	702240	1.36649e+06	1.51258e+06
Latin America & the Caribbean	Urban	2028	483752	529864	550803
Northern America and Europe	Urban	2028	778943	857353	889090
Oceania excluding Australia and New Zealand	Urban	2028	312.678	899.347	1938.48
Sub-Saharan Africa	Urban	2028	172830	211836	256733
Western Asia and Northern Africa	Urban	2028	334060	355673	366245
Australia and New Zealand	Urban	2029	29003.6	29003.6	29003.6
Central Asia and Southern Asia	Urban	2029	592118	801716	872289
Eastern Asia and South-eastern Asia	Urban	2029	687630	1.3834e+06	1.53386e+06
Latin America & the Caribbean	Urban	2029	481631	532397	555777
Northern America and Europe	Urban	2029	782357	859541	893581
Oceania excluding Australia and New Zealand	Urban	2029	289.123	898.55	2013.87
Sub-Saharan Africa	Urban	2029	177131	218481	267737
Western Asia and Northern Africa	Urban	2029	337074	360937	372874
Australia and New Zealand	Urban	2030	29319.1	29319.1	29319.1
Central Asia and Southern Asia	Urban	2030	590335	822918	893242
Eastern Asia and South-eastern Asia	Urban	2030	669603	1.40235e+06	1.55252e+06
Latin America & the Caribbean	Urban	2030	478157	535697	560729
Northern America and Europe	Urban	2030	785467	860100	897694
Oceania excluding Australia and New Zealand	Urban	2030	280.379	911.966	2090.8
Sub-Saharan Africa	Urban	2030	181379	224423	278550
Western Asia and Northern Africa	Urban	2030	338997	366256	379366
Australia and New Zealand	Rural	1990	3000.94	3000.94	3000.94
Central Asia and Southern Asia	Rural	1990	35518.1	58473.1	87356.8
Eastern Asia and South-eastern Asia	Rural	1990	78862	322969	768723
Latin America & the Caribbean	Rural	1990	29980	40134	52014.7
Northern America and Europe	Rural	1990	248094	260006	270359
Oceania excluding Australia and New Zealand	Rural	1990	103.392	274.462	874.847
Sub-Saharan Africa	Rural	1990	7238.82	13163.8	28005.3
Western Asia and Northern Africa	Rural	1990	51844.5	70049.3	88676.8
Australia and New Zealand	Rural	1991	3039.84	3039.84	3039.84
Central Asia and Southern Asia	Rural	1991	38446.4	60626	88929.8
Eastern Asia and South-eastern Asia	Rural	1991	82420.3	315469	740321
Latin America & the Caribbean	Rural	1991	31144.8	41381.2	52530.7
Northern America and Europe	Rural	1991	248804	260011	270019
Oceania excluding Australia and New Zealand	Rural	1991	106.45	274.629	808.878
Sub-Saharan Africa	Rural	1991	7175.44	12614.2	26218
Western Asia and Northern Africa	Rural	1991	54462.7	72459	90205
Australia and New Zealand	Rural	1992	3094.91	3094.91	3094.91
Central Asia and Southern Asia	Rural	1992	41598.4	63541.7	93180.6
Eastern Asia and South-eastern Asia	Rural	1992	88818.2	318717	705985
Latin America & the Caribbean	Rural	1992	33202.2	42607.5	52956
Northern America and Europe	Rural	1992	248828	259797	269434
Oceania excluding Australia and New Zealand	Rural	1992	109.046	278.122	785.256
Sub-Saharan Africa	Rural	1992	7195.7	12322.7	25232
Western Asia and Northern Africa	Rural	1992	57760.7	75015.1	91903.5
Australia and New Zealand	Rural	1993	3150.92	3150.92	3150.92
Central Asia and Southern Asia	Rural	1993	44739.3	66649.8	94310
Eastern Asia and South-eastern Asia	Rural	1993	95653	318359	682159
Latin America & the Caribbean	Rural	1993	34595.7	44238.3	53833.2
Northern America and Europe	Rural	1993	249097	259494	268700
Oceania excluding Australia and New Zealand	Rural	1993	114.191	279.434	764.25
Sub-Saharan Africa	Rural	1993	7413.76	12007.4	23602.9
Western Asia and Northern Africa	Rural	1993	61515.8	77929.9	94517.6
Australia and New Zealand	Rural	1994	3206.2	3206.2	3206.2
Central Asia and Southern Asia	Rural	1994	47891.2	70160.7	99095.1
Eastern Asia and South-eastern Asia	Rural	1994	97248.2	309221	649770
Latin America & the Caribbean	Rural	1994	35730.7	45437.4	55026.3
Northern America and Europe	Rural	1994	249566	259004	268216
Oceania excluding Australia and New Zealand	Rural	1994	115.766	275.805	731.882
Sub-Saharan Africa	Rural	1994	7225.18	11905.3	21996.2
Western Asia and Northern Africa	Rural	1994	64536.3	80855.8	96125.2
Australia and New Zealand	Rural	1995	3260.8	3260.8	3260.8
Central Asia and Southern Asia	Rural	1995	51312.2	73539.9	104179
Eastern Asia and South-eastern Asia	Rural	1995	107149	303095	620480
Latin America & the Caribbean	Rural	1995	37451	46736.8	55944
Northern America and Europe	Rural	1995	249828	258735	267239
Oceania excluding Australia and New Zealand	Rural	1995	119.446	276.321	723.861
Sub-Saharan Africa	Rural	1995	7495.4	11807.7	21675.3
Western Asia and Northern Africa	Rural	1995	69104.1	84409.3	98504.7
Australia and New Zealand	Rural	1996	3314.81	3314.81	3314.81
Central Asia and Southern Asia	Rural	1996	55014.3	77518.7	109808
Eastern Asia and South-eastern Asia	Rural	1996	115222	300238	604753
Latin America & the Caribbean	Rural	1996	38791.5	48139.8	57167.8
Northern America and Europe	Rural	1996	249988	258265	266649
Oceania excluding Australia and New Zealand	Rural	1996	121.16	275.741	717.995
Sub-Saharan Africa	Rural	1996	7473.35	11756.6	21175
Western Asia and Northern Africa	Rural	1996	73310.9	87993.6	100790
Australia and New Zealand	Rural	1997	3370.93	3370.93	3370.93
Central Asia and Southern Asia	Rural	1997	58870	83205.1	118183
Eastern Asia and South-eastern Asia	Rural	1997	119247	298654	585769
Latin America & the Caribbean	Rural	1997	40387.2	49297.7	58143.8
Northern America and Europe	Rural	1997	249651	257879	265720
Oceania excluding Australia and New Zealand	Rural	1997	125.289	276.672	694.436
Sub-Saharan Africa	Rural	1997	7926.08	11865.4	19938.1
Western Asia and Northern Africa	Rural	1997	78219.4	91722.7	103576
Australia and New Zealand	Rural	1998	3427.48	3427.48	3427.48
Central Asia and Southern Asia	Rural	1998	61887.6	87971.3	123879
Eastern Asia and South-eastern Asia	Rural	1998	129212	290392	560636
Latin America & the Caribbean	Rural	1998	41387.7	50427.7	59320.9
Northern America and Europe	Rural	1998	249560	257476	264580
Oceania excluding Australia and New Zealand	Rural	1998	128.433	274.087	695.595
Sub-Saharan Africa	Rural	1998	8122.18	12003.4	19301.2
Western Asia and Northern Africa	Rural	1998	83321.1	95786.7	106635
Australia and New Zealand	Rural	1999	3485.31	3485.31	3485.31
Central Asia and Southern Asia	Rural	1999	67606.9	94893.6	133750
Eastern Asia and South-eastern Asia	Rural	1999	129029	286783	542715
Latin America & the Caribbean	Rural	1999	42962.2	51375.6	59949
Northern America and Europe	Rural	1999	249422	257187	263851
Oceania excluding Australia and New Zealand	Rural	1999	126.908	271.084	680.856
Sub-Saharan Africa	Rural	1999	8523.62	12333	19486.3
Western Asia and Northern Africa	Rural	1999	88043	99934.6	109528
Australia and New Zealand	Rural	2000	3545.19	3545.19	3545.19
Central Asia and Southern Asia	Rural	2000	71264.5	100953	142345
Eastern Asia and South-eastern Asia	Rural	2000	133913	284496	533781
Latin America & the Caribbean	Rural	2000	44213.6	52591.3	60752
Northern America and Europe	Rural	2000	249578	257083	262993
Oceania excluding Australia and New Zealand	Rural	2000	128.484	273.926	699.258
Sub-Saharan Africa	Rural	2000	8861.97	12652.2	19506.8
Western Asia and Northern Africa	Rural	2000	92931.8	104145	112837
Australia and New Zealand	Rural	2001	3606.83	3606.83	3606.83
Central Asia and Southern Asia	Rural	2001	75619	107198	151603
Eastern Asia and South-eastern Asia	Rural	2001	134792	280644	506889
Latin America & the Caribbean	Rural	2001	45644.9	53881	62132.9
Northern America and Europe	Rural	2001	249411	257174	262492
Oceania excluding Australia and New Zealand	Rural	2001	131.837	269.382	681.928
Sub-Saharan Africa	Rural	2001	9470.98	13295.7	19200.4
Western Asia and Northern Africa	Rural	2001	98153.9	107944	116094
Australia and New Zealand	Rural	2002	3621.31	3621.31	3621.31
Central Asia and Southern Asia	Rural	2002	79673.8	113659	161541
Eastern Asia and South-eastern Asia	Rural	2002	139982	277785	514315
Latin America & the Caribbean	Rural	2002	46879.3	55343.3	63335
Northern America and Europe	Rural	2002	249022	257056	261788
Oceania excluding Australia and New Zealand	Rural	2002	130.886	270.763	703.928
Sub-Saharan Africa	Rural	2002	9970.42	13783.3	19827.6
Western Asia and Northern Africa	Rural	2002	102305	112071	119365
Australia and New Zealand	Rural	2003	3638.24	3638.24	3638.24
Central Asia and Southern Asia	Rural	2003	84335.5	120642	169773
Eastern Asia and South-eastern Asia	Rural	2003	141183	272871	481568
Latin America & the Caribbean	Rural	2003	48654.2	56603.7	64479.9
Northern America and Europe	Rural	2003	248560	256859	261069
Oceania excluding Australia and New Zealand	Rural	2003	138.502	271.264	688.163
Sub-Saharan Africa	Rural	2003	10462.9	14465.4	20237.3
Western Asia and Northern Africa	Rural	2003	106822	115769	122813
Australia and New Zealand	Rural	2004	3659.24	3659.24	3659.24
Central Asia and Southern Asia	Rural	2004	91948.1	127243	178058
Eastern Asia and South-eastern Asia	Rural	2004	145491	275101	474432
Latin America & the Caribbean	Rural	2004	49645.4	57711.8	65322.4
Northern America and Europe	Rural	2004	247188	256483	260399
Oceania excluding Australia and New Zealand	Rural	2004	134.196	270.595	688.446
Sub-Saharan Africa	Rural	2004	11156.1	15095.7	20934.9
Western Asia and Northern Africa	Rural	2004	110652	119129	125759
Australia and New Zealand	Rural	2005	3685.33	3685.33	3685.33
Central Asia and Southern Asia	Rural	2005	96112	134270	189581
Eastern Asia and South-eastern Asia	Rural	2005	150192	275320	488674
Latin America & the Caribbean	Rural	2005	51143.3	58989	66687.4
Northern America and Europe	Rural	2005	246925	256001	259584
Oceania excluding Australia and New Zealand	Rural	2005	135.057	274.227	704.175
Sub-Saharan Africa	Rural	2005	11771.6	15888.2	21838.3
Western Asia and Northern Africa	Rural	2005	113953	122222	128773
Australia and New Zealand	Rural	2006	3716.99	3716.99	3716.99
Central Asia and Southern Asia	Rural	2006	101381	142061	200574
Eastern Asia and South-eastern Asia	Rural	2006	150580	277964	470855
Latin America & the Caribbean	Rural	2006	52723.1	60258	67730.2
Northern America and Europe	Rural	2006	245574	255429	258849
Oceania excluding Australia and New Zealand	Rural	2006	136.428	273.692	704.911
Sub-Saharan Africa	Rural	2006	12316.9	16556.2	22423.6
Western Asia and Northern Africa	Rural	2006	117322	125220	131115
Australia and New Zealand	Rural	2007	3757.54	3757.54	3757.54
Central Asia and Southern Asia	Rural	2007	108828	151302	209481
Eastern Asia and South-eastern Asia	Rural	2007	152085	280712	476943
Latin America & the Caribbean	Rural	2007	53663.4	61228.2	68494.9
Northern America and Europe	Rural	2007	244935	254688	258051
Oceania excluding Australia and New Zealand	Rural	2007	135.726	276.601	697.842
Sub-Saharan Africa	Rural	2007	13044.4	17359.2	23160.5
Western Asia and Northern Africa	Rural	2007	120843	128101	134184
Australia and New Zealand	Rural	2008	3800.54	3800.54	3800.54
Central Asia and Southern Asia	Rural	2008	114148	159482	219726
Eastern Asia and South-eastern Asia	Rural	2008	157288	287324	478399
Latin America & the Caribbean	Rural	2008	55369.7	62467.7	69206.9
Northern America and Europe	Rural	2008	241353	253784	257309
Oceania excluding Australia and New Zealand	Rural	2008	133.692	274.827	729.008
Sub-Saharan Africa	Rural	2008	13783.2	18116.2	23546.7
Western Asia and Northern Africa	Rural	2008	123701	130849	136700
Australia and New Zealand	Rural	2009	3842.98	3842.98	3842.98
Central Asia and Southern Asia	Rural	2009	120532	169476	235090
Eastern Asia and South-eastern Asia	Rural	2009	162531	293670	490479
Latin America & the Caribbean	Rural	2009	56457.9	63421.1	70168.7
Northern America and Europe	Rural	2009	239379	252735	256399
Oceania excluding Australia and New Zealand	Rural	2009	134.159	275.83	771.2
Sub-Saharan Africa	Rural	2009	14571.9	18879.2	24838.4
Western Asia and Northern Africa	Rural	2009	126788	133663	139519
Australia and New Zealand	Rural	2010	3882.58	3882.58	3882.58
Central Asia and Southern Asia	Rural	2010	131080	182583	250998
Eastern Asia and South-eastern Asia	Rural	2010	170624	305243	489505
Latin America & the Caribbean	Rural	2010	57245	64497.6	70997.3
Northern America and Europe	Rural	2010	237814	251481	255453
Oceania excluding Australia and New Zealand	Rural	2010	133.143	278.256	839.27
Sub-Saharan Africa	Rural	2010	14934.3	19586.8	25705.9
Western Asia and Northern Africa	Rural	2010	129599	136128	141917
Australia and New Zealand	Rural	2011	3918.61	3918.61	3918.61
Central Asia and Southern Asia	Rural	2011	141569	194426	268340
Eastern Asia and South-eastern Asia	Rural	2011	175597	316045	497231
Latin America & the Caribbean	Rural	2011	58669.7	65580.8	71741.2
Northern America and Europe	Rural	2011	235746	250100	254315
Oceania excluding Australia and New Zealand	Rural	2011	129.827	279.331	841.832
Sub-Saharan Africa	Rural	2011	15862.7	20456.1	26575.8
Western Asia and Northern Africa	Rural	2011	132158	138827	144903
Australia and New Zealand	Rural	2012	3949.95	3949.95	3949.95
Central Asia and Southern Asia	Rural	2012	151168	210281	285594
Eastern Asia and South-eastern Asia	Rural	2012	183249	326657	515073
Latin America & the Caribbean	Rural	2012	60013	66617.5	72846.3
Northern America and Europe	Rural	2012	232412	248623	253077
Oceania excluding Australia and New Zealand	Rural	2012	125.454	277.33	866.848
Sub-Saharan Africa	Rural	2012	16191.4	21164.1	27808.9
Western Asia and Northern Africa	Rural	2012	134944	141511	147427
Australia and New Zealand	Rural	2013	3978.88	3978.88	3978.88
Central Asia and Southern Asia	Rural	2013	161479	227067	304813
Eastern Asia and South-eastern Asia	Rural	2013	191968	337661	518948
Latin America & the Caribbean	Rural	2013	60724.1	67829.8	73789.1
Northern America and Europe	Rural	2013	227758	246898	251842
Oceania excluding Australia and New Zealand	Rural	2013	122.954	289.723	936.821
Sub-Saharan Africa	Rural	2013	16974.2	21809	28854.9
Western Asia and Northern Africa	Rural	2013	137382	144087	150309
Australia and New Zealand	Rural	2014	4006.42	4006.42	4006.42
Central Asia and Southern Asia	Rural	2014	170220	247425	330197
Eastern Asia and South-eastern Asia	Rural	2014	194725	352257	552253
Latin America & the Caribbean	Rural	2014	62067.7	68901.6	74941.9
Northern America and Europe	Rural	2014	225644	245168	250586
Oceania excluding Australia and New Zealand	Rural	2014	123.759	290.942	1059.88
Sub-Saharan Africa	Rural	2014	17667.2	22646.7	29612.5
Western Asia and Northern Africa	Rural	2014	138883	146494	153458
Australia and New Zealand	Rural	2015	4033.34	4033.34	4033.34
Central Asia and Southern Asia	Rural	2015	182439	269245	365492
Eastern Asia and South-eastern Asia	Rural	2015	204016	362642	566244
Latin America & the Caribbean	Rural	2015	62787.6	70159.5	76227.1
Northern America and Europe	Rural	2015	221798	243243	249264
Oceania excluding Australia and New Zealand	Rural	2015	121.689	284.329	1223.43
Sub-Saharan Africa	Rural	2015	18340.8	23530.7	31110.4
Western Asia and Northern Africa	Rural	2015	140997	148616	155607
Australia and New Zealand	Rural	2016	4059.67	4059.67	4059.67
Central Asia and Southern Asia	Rural	2016	198857	293889	400641
Eastern Asia and South-eastern Asia	Rural	2016	206045	375653	595280
Latin America & the Caribbean	Rural	2016	63653.1	71311.9	77480.5
Northern America and Europe	Rural	2016	218459	241393	247962
Oceania excluding Australia and New Zealand	Rural	2016	119.776	293.77	1284.63
Sub-Saharan Africa	Rural	2016	18910	24345.2	33185.2
Western Asia and Northern Africa	Rural	2016	142326	150683	158722
Australia and New Zealand	Rural	2017	4083.53	4083.53	4083.53
Central Asia and Southern Asia	Rural	2017	210039	316895	443596
Eastern Asia and South-eastern Asia	Rural	2017	211006	387408	613503
Latin America & the Caribbean	Rural	2017	64759.9	72445.5	78630.2
Northern America and Europe	Rural	2017	215398	239338	246410
Oceania excluding Australia and New Zealand	Rural	2017	117.842	292.334	1453.92
Sub-Saharan Africa	Rural	2017	19396.6	25492.4	34115
Western Asia and Northern Africa	Rural	2017	143421	152598	161411
Australia and New Zealand	Rural	2018	4104.61	4104.61	4104.61
Central Asia and Southern Asia	Rural	2018	216618	347629	494066
Eastern Asia and South-eastern Asia	Rural	2018	209116	394917	636856
Latin America & the Caribbean	Rural	2018	65165.4	73328.8	79876
Northern America and Europe	Rural	2018	211931	237341	244674
Oceania excluding Australia and New Zealand	Rural	2018	114.141	297.917	1700.84
Sub-Saharan Africa	Rural	2018	20081.1	26539.4	37084.3
Western Asia and Northern Africa	Rural	2018	144373	154755	164418
Australia and New Zealand	Rural	2019	4122.66	4122.66	4122.66
Central Asia and Southern Asia	Rural	2019	225177	375027	554446
Eastern Asia and South-eastern Asia	Rural	2019	217363	404963	652988
Latin America & the Caribbean	Rural	2019	65875.5	74129.6	80817
Northern America and Europe	Rural	2019	208246	235107	243252
Oceania excluding Australia and New Zealand	Rural	2019	114.808	305.232	1837.85
Sub-Saharan Africa	Rural	2019	20618.7	27552	37942.8
Western Asia and Northern Africa	Rural	2019	145328	156411	167453
Australia and New Zealand	Rural	2020	4137.49	4137.49	4137.49
Central Asia and Southern Asia	Rural	2020	231996	409222	617937
Eastern Asia and South-eastern Asia	Rural	2020	220730	414300	666975
Latin America & the Caribbean	Rural	2020	66069.2	75078.2	81973
Northern America and Europe	Rural	2020	204728	232707	241403
Oceania excluding Australia and New Zealand	Rural	2020	112.654	306.43	2110.26
Sub-Saharan Africa	Rural	2020	21285.6	28988.6	41366
Western Asia and Northern Africa	Rural	2020	146104	158200	170214
Australia and New Zealand	Rural	2021	4149.04	4149.04	4149.04
Central Asia and Southern Asia	Rural	2021	245467	439977	668582
Eastern Asia and South-eastern Asia	Rural	2021	223978	418272	674870
Latin America & the Caribbean	Rural	2021	65885.3	75690.6	83390.9
Northern America and Europe	Rural	2021	201652	230432	239521
Oceania excluding Australia and New Zealand	Rural	2021	110.941	312.097	2386.09
Sub-Saharan Africa	Rural	2021	21801.3	30362.1	44585.9
Western Asia and Northern Africa	Rural	2021	146958	159962	172821
Australia and New Zealand	Rural	2022	4157.45	4157.45	4157.45
Central Asia and Southern Asia	Rural	2022	251768	471258	723833
Eastern Asia and South-eastern Asia	Rural	2022	222109	427616	687673
Latin America & the Caribbean	Rural	2022	65987.8	76290.8	84317.2
Northern America and Europe	Rural	2022	199020	227936	237636
Oceania excluding Australia and New Zealand	Rural	2022	108.957	309.096	2714.48
Sub-Saharan Africa	Rural	2022	22348.4	31790.2	46985.9
Western Asia and Northern Africa	Rural	2022	147223	161902	175443
Australia and New Zealand	Rural	2023	4162.87	4162.87	4162.87
Central Asia and Southern Asia	Rural	2023	254497	506754	785684
Eastern Asia and South-eastern Asia	Rural	2023	225471	434325	688443
Latin America & the Caribbean	Rural	2023	65834.3	76799.3	85407.7
Northern America and Europe	Rural	2023	196000	225412	235571
Oceania excluding Australia and New Zealand	Rural	2023	107.333	311.754	2994.27
Sub-Saharan Africa	Rural	2023	22951.3	33572.9	51162.3
Western Asia and Northern Africa	Rural	2023	147721	163361	178020
Australia and New Zealand	Rural	2024	4165.56	4165.56	4165.56
Central Asia and Southern Asia	Rural	2024	261232	540853	831064
Eastern Asia and South-eastern Asia	Rural	2024	228173	439524	693136
Latin America & the Caribbean	Rural	2024	65131.8	77271.7	86182.8
Northern America and Europe	Rural	2024	193600	222631	233056
Oceania excluding Australia and New Zealand	Rural	2024	104.678	317.546	3477.49
Sub-Saharan Africa	Rural	2024	23643	35092.1	54798.8
Western Asia and Northern Africa	Rural	2024	148185	164914	179885
Australia and New Zealand	Rural	2025	4165.71	4165.71	4165.71
Central Asia and Southern Asia	Rural	2025	270842	575982	882103
Eastern Asia and South-eastern Asia	Rural	2025	230164	441934	689866
Latin America & the Caribbean	Rural	2025	65522.3	77519.3	86551.4
Northern America and Europe	Rural	2025	190868	219450	230941
Oceania excluding Australia and New Zealand	Rural	2025	104.176	319.63	3762.67
Sub-Saharan Africa	Rural	2025	23995.5	36395.2	59324
Western Asia and Northern Africa	Rural	2025	148250	165975	181988
Australia and New Zealand	Rural	2026	4163.38	4163.38	4163.38
Central Asia and Southern Asia	Rural	2026	279232	613047	916118
Eastern Asia and South-eastern Asia	Rural	2026	228339	447329	688357
Latin America & the Caribbean	Rural	2026	64518.3	77690.6	87495.1
Northern America and Europe	Rural	2026	187694	216503	228552
Oceania excluding Australia and New Zealand	Rural	2026	103.697	322.656	3953.21
Sub-Saharan Africa	Rural	2026	24942.4	38263.3	65200.1
Western Asia and Northern Africa	Rural	2026	148305	167322	184159
Australia and New Zealand	Rural	2027	4158.56	4158.56	4158.56
Central Asia and Southern Asia	Rural	2027	282547	644648	957350
Eastern Asia and South-eastern Asia	Rural	2027	228419	447252	685778
Latin America & the Caribbean	Rural	2027	64506.6	77691.6	87582.7
Northern America and Europe	Rural	2027	185767	213589	225949
Oceania excluding Australia and New Zealand	Rural	2027	98.5298	333.798	4468.02
Sub-Saharan Africa	Rural	2027	24969.4	40065.7	70117
Western Asia and Northern Africa	Rural	2027	148456	167986	185873
Australia and New Zealand	Rural	2028	4151.23	4151.23	4151.23
Central Asia and Southern Asia	Rural	2028	288062	678962	985852
Eastern Asia and South-eastern Asia	Rural	2028	227350	450695	681841
Latin America & the Caribbean	Rural	2028	63539.4	77841.9	88253.8
Northern America and Europe	Rural	2028	182792	211094	223402
Oceania excluding Australia and New Zealand	Rural	2028	99.3286	339.475	4829.68
Sub-Saharan Africa	Rural	2028	25614.3	41436.9	75368.1
Western Asia and Northern Africa	Rural	2028	148075	169146	186971
Australia and New Zealand	Rural	2029	4141.3	4141.3	4141.3
Central Asia and Southern Asia	Rural	2029	300254	710509	1.01837e+06
Eastern Asia and South-eastern Asia	Rural	2029	228337	451409	672778
Latin America & the Caribbean	Rural	2029	62774.8	77602	88329.1
Northern America and Europe	Rural	2029	180471	208015	220709
Oceania excluding Australia and New Zealand	Rural	2029	100.308	351.181	5381.31
Sub-Saharan Africa	Rural	2029	26302.4	43976	80774
Western Asia and Northern Africa	Rural	2029	148205	169777	188223
Australia and New Zealand	Rural	2030	4128.75	4128.75	4128.75
Central Asia and Southern Asia	Rural	2030	310304	744186	1.03988e+06
Eastern Asia and South-eastern Asia	Rural	2030	225246	455032	667866
Latin America & the Caribbean	Rural	2030	61705	77457.9	88392.3
Northern America and Europe	Rural	2030	177584	204424	217865
Oceania excluding Australia and New Zealand	Rural	2030	99.1084	348.102	5651.96
Sub-Saharan Africa	Rural	2030	26498.8	45649.1	90341.5
Western Asia and Northern Africa	Rural	2030	147302	170139	189508
Australia and New Zealand	Overall	1990	20439.6	20439.6	20439.6
Central Asia and Southern Asia	Overall	1990	143130	215285	318669
Eastern Asia and South-eastern Asia	Overall	1990	390147	726277	1.15244e+06
Latin America & the Caribbean	Overall	1990	275129	300196	322147
Northern America and Europe	Overall	1990	937250	959941	974056
Oceania excluding Australia and New Zealand	Overall	1990	407.87	711.985	1336.59
Sub-Saharan Africa	Overall	1990	37400.6	47843	65834.5
Western Asia and Northern Africa	Overall	1990	171439	199092	221044
Australia and New Zealand	Overall	1991	20718	20718	20718
Central Asia and Southern Asia	Overall	1991	154805	229574	338469
Eastern Asia and South-eastern Asia	Overall	1991	402745	739212	1.13997e+06
Latin America & the Caribbean	Overall	1991	286288	311239	331823
Northern America and Europe	Overall	1991	946322	966033	979323
Oceania excluding Australia and New Zealand	Overall	1991	427.871	723.532	1341.73
Sub-Saharan Africa	Overall	1991	38412.6	48546.2	65135.6
Western Asia and Northern Africa	Overall	1991	180311	206641	227285
Australia and New Zealand	Overall	1992	20989.1	20989.1	20989.1
Central Asia and Southern Asia	Overall	1992	161413	242904	349782
Eastern Asia and South-eastern Asia	Overall	1992	444538	745565	1.12471e+06
Latin America & the Caribbean	Overall	1992	297385	321950	342331
Northern America and Europe	Overall	1992	952291	971534	984006
Oceania excluding Australia and New Zealand	Overall	1992	448.431	748.368	1326.63
Sub-Saharan Africa	Overall	1992	39971.6	49530.5	64530.2
Western Asia and Northern Africa	Overall	1992	189383	214114	234522
Australia and New Zealand	Overall	1993	21251.9	21251.9	21251.9
Central Asia and Southern Asia	Overall	1993	175161	257622	372315
Eastern Asia and South-eastern Asia	Overall	1993	466576	759915	1.1129e+06
Latin America & the Caribbean	Overall	1993	310047	333190	352477
Northern America and Europe	Overall	1993	957403	976851	988840
Oceania excluding Australia and New Zealand	Overall	1993	466.102	760.558	1339.36
Sub-Saharan Africa	Overall	1993	41340.4	50485.6	64446.3
Western Asia and Northern Africa	Overall	1993	198586	222152	240945
Australia and New Zealand	Overall	1994	21506	21506	21506
Central Asia and Southern Asia	Overall	1994	185235	274124	393700
Eastern Asia and South-eastern Asia	Overall	1994	486453	769544	1.09351e+06
Latin America & the Caribbean	Overall	1994	320664	343636	362152
Northern America and Europe	Overall	1994	964878	982000	993675
Oceania excluding Australia and New Zealand	Overall	1994	479.152	774.811	1339.31
Sub-Saharan Africa	Overall	1994	43121	51764.4	64338.9
Western Asia and Northern Africa	Overall	1994	206278	229739	247710
Australia and New Zealand	Overall	1995	21751.7	21751.7	21751.7
Central Asia and Southern Asia	Overall	1995	199640	289589	419674
Eastern Asia and South-eastern Asia	Overall	1995	499284	780541	1.07262e+06
Latin America & the Caribbean	Overall	1995	330777	354181	372699
Northern America and Europe	Overall	1995	970304	986840	997420
Oceania excluding Australia and New Zealand	Overall	1995	499.558	782.845	1323.64
Sub-Saharan Africa	Overall	1995	44715.1	53193	65700.7
Western Asia and Northern Africa	Overall	1995	216525	238138	255177
Australia and New Zealand	Overall	1996	21989	21989	21989
Central Asia and Southern Asia	Overall	1996	208616	309286	441637
Eastern Asia and South-eastern Asia	Overall	1996	511145	794737	1.07142e+06
Latin America & the Caribbean	Overall	1996	341775	365086	382769
Northern America and Europe	Overall	1996	975400	991824	1.00215e+06
Oceania excluding Australia and New Zealand	Overall	1996	518.604	803.73	1342.62
Sub-Saharan Africa	Overall	1996	46330.2	54415.4	66593.7
Western Asia and Northern Africa	Overall	1996	225562	246052	262365
Australia and New Zealand	Overall	1997	22220	22220	22220
Central Asia and Southern Asia	Overall	1997	223474	327827	469024
Eastern Asia and South-eastern Asia	Overall	1997	536398	806858	1.06568e+06
Latin America & the Caribbean	Overall	1997	353524	375933	392697
Northern America and Europe	Overall	1997	982588	996320	1.00611e+06
Oceania excluding Australia and New Zealand	Overall	1997	527.758	814.292	1352.45
Sub-Saharan Africa	Overall	1997	48287.1	56333.3	67703.9
Western Asia and Northern Africa	Overall	1997	236649	254619	269419
Australia and New Zealand	Overall	1998	22449	22449	22449
Central Asia and Southern Asia	Overall	1998	237236	352289	493089
Eastern Asia and South-eastern Asia	Overall	1998	559972	817368	1.06353e+06
Latin America & the Caribbean	Overall	1998	363637	386018	403750
Northern America and Europe	Overall	1998	986668	1.00093e+06	1.0097e+06
Oceania excluding Australia and New Zealand	Overall	1998	539.836	831.073	1364.94
Sub-Saharan Africa	Overall	1998	50077.5	58089.1	68467.6
Western Asia and Northern Africa	Overall	1998	246657	263528	277342
Australia and New Zealand	Overall	1999	22682.2	22682.2	22682.2
Central Asia and Southern Asia	Overall	1999	250844	372525	521890
Eastern Asia and South-eastern Asia	Overall	1999	585162	831335	1.07208e+06
Latin America & the Caribbean	Overall	1999	374565	396521	412888
Northern America and Europe	Overall	1999	991532	1.00549e+06	1.01351e+06
Oceania excluding Australia and New Zealand	Overall	1999	536.119	839.747	1405.37
Sub-Saharan Africa	Overall	1999	51980.6	60321.2	70442.8
Western Asia and Northern Africa	Overall	1999	257752	272874	284966
Australia and New Zealand	Overall	2000	22924.8	22924.8	22924.8
Central Asia and Southern Asia	Overall	2000	266847	396035	562870
Eastern Asia and South-eastern Asia	Overall	2000	604336	849518	1.07936e+06
Latin America & the Caribbean	Overall	2000	385081	406782	423560
Northern America and Europe	Overall	2000	996516	1.00987e+06	1.0176e+06
Oceania excluding Australia and New Zealand	Overall	2000	547.03	861.509	1455.45
Sub-Saharan Africa	Overall	2000	54943.8	62698.8	72092.9
Western Asia and Northern Africa	Overall	2000	266935	282127	293401
Australia and New Zealand	Overall	2001	23176.5	23176.5	23176.5
Central Asia and Southern Asia	Overall	2001	283600	421400	582847
Eastern Asia and South-eastern Asia	Overall	2001	627958	870984	1.10881e+06
Latin America & the Caribbean	Overall	2001	394088	416501	433400
Northern America and Europe	Overall	2001	999659	1.01469e+06	1.02164e+06
Oceania excluding Australia and New Zealand	Overall	2001	561.477	875.383	1462.1
Sub-Saharan Africa	Overall	2001	57705.7	65230.8	74526.1
Western Asia and Northern Africa	Overall	2001	278086	291456	302256
Australia and New Zealand	Overall	2002	23438.4	23438.4	23438.4
Central Asia and Southern Asia	Overall	2002	299290	445860	621351
Eastern Asia and South-eastern Asia	Overall	2002	658280	891625	1.11205e+06
Latin America & the Caribbean	Overall	2002	403989	425870	441562
Northern America and Europe	Overall	2002	1.00386e+06	1.01928e+06	1.02564e+06
Oceania excluding Australia and New Zealand	Overall	2002	553.288	894.664	1500.52
Sub-Saharan Africa	Overall	2002	60503.4	68072.8	77374.3
Western Asia and Northern Africa	Overall	2002	287554	300602	310605
Australia and New Zealand	Overall	2003	23719	23719	23719
Central Asia and Southern Asia	Overall	2003	309990	474540	652793
Eastern Asia and South-eastern Asia	Overall	2003	657799	915754	1.13662e+06
Latin America & the Caribbean	Overall	2003	413129	434889	450747
Northern America and Europe	Overall	2003	1.00799e+06	1.02372e+06	1.02983e+06
Oceania excluding Australia and New Zealand	Overall	2003	562.525	909.071	1552.52
Sub-Saharan Africa	Overall	2003	63641.1	71369.6	80158.9
Western Asia and Northern Africa	Overall	2003	297775	309615	319170
Australia and New Zealand	Overall	2004	24028.9	24028.9	24028.9
Central Asia and Southern Asia	Overall	2004	331338	494450	689537
Eastern Asia and South-eastern Asia	Overall	2004	693046	943874	1.15919e+06
Latin America & the Caribbean	Overall	2004	422680	444279	459402
Northern America and Europe	Overall	2004	1.01075e+06	1.02827e+06	1.03376e+06
Oceania excluding Australia and New Zealand	Overall	2004	577.355	924.734	1572.33
Sub-Saharan Africa	Overall	2004	67029.2	74713.6	83924.9
Western Asia and Northern Africa	Overall	2004	307529	318999	327816
Australia and New Zealand	Overall	2005	24374.3	24374.3	24374.3
Central Asia and Southern Asia	Overall	2005	347870	518963	721381
Eastern Asia and South-eastern Asia	Overall	2005	722930	972195	1.19933e+06
Latin America & the Caribbean	Overall	2005	432179	452975	468192
Northern America and Europe	Overall	2005	1.01487e+06	1.03299e+06	1.03845e+06
Oceania excluding Australia and New Zealand	Overall	2005	565.419	944.773	1625.89
Sub-Saharan Africa	Overall	2005	70123.4	78174.9	87705.3
Western Asia and Northern Africa	Overall	2005	317348	328157	337076
Australia and New Zealand	Overall	2006	24759.5	24759.5	24759.5
Central Asia and Southern Asia	Overall	2006	364674	548523	759287
Eastern Asia and South-eastern Asia	Overall	2006	769088	1.00814e+06	1.23698e+06
Latin America & the Caribbean	Overall	2006	440522	462262	476724
Northern America and Europe	Overall	2006	1.01793e+06	1.03763e+06	1.04306e+06
Oceania excluding Australia and New Zealand	Overall	2006	584.709	970.072	1603.93
Sub-Saharan Africa	Overall	2006	73803.9	82216.8	91441.1
Western Asia and Northern Africa	Overall	2006	327649	337922	346504
Australia and New Zealand	Overall	2007	25179.8	25179.8	25179.8
Central Asia and Southern Asia	Overall	2007	383863	571669	792143
Eastern Asia and South-eastern Asia	Overall	2007	797055	1.0436e+06	1.27451e+06
Latin America & the Caribbean	Overall	2007	448741	470675	484983
Northern America and Europe	Overall	2007	1.0198e+06	1.04244e+06	1.04776e+06
Oceania excluding Australia and New Zealand	Overall	2007	602.451	987.914	1686.05
Sub-Saharan Africa	Overall	2007	77989.4	86002.9	95880.1
Western Asia and Northern Africa	Overall	2007	337055	347619	356154
Australia and New Zealand	Overall	2008	25620.8	25620.8	25620.8
Central Asia and Southern Asia	Overall	2008	403780	593671	817500
Eastern Asia and South-eastern Asia	Overall	2008	837072	1.08856e+06	1.33007e+06
Latin America & the Caribbean	Overall	2008	458564	479087	493754
Northern America and Europe	Overall	2008	1.02185e+06	1.04716e+06	1.05292e+06
Oceania excluding Australia and New Zealand	Overall	2008	610.86	1011.65	1692.86
Sub-Saharan Africa	Overall	2008	81705.2	90104.7	99623.5
Western Asia and Northern Africa	Overall	2008	347272	357565	365933
Australia and New Zealand	Overall	2009	26062.5	26062.5	26062.5
Central Asia and Southern Asia	Overall	2009	424641	626486	855900
Eastern Asia and South-eastern Asia	Overall	2009	875331	1.12688e+06	1.36508e+06
Latin America & the Caribbean	Overall	2009	467000	487499	501739
Northern America and Europe	Overall	2009	1.02332e+06	1.05118e+06	1.05753e+06
Oceania excluding Australia and New Zealand	Overall	2009	618.882	1009.81	1777.54
Sub-Saharan Africa	Overall	2009	85742.9	94322.2	104789
Western Asia and Northern Africa	Overall	2009	357307	367396	375828
Australia and New Zealand	Overall	2010	26490.1	26490.1	26490.1
Central Asia and Southern Asia	Overall	2010	447699	654218	883302
Eastern Asia and South-eastern Asia	Overall	2010	920286	1.17247e+06	1.41547e+06
Latin America & the Caribbean	Overall	2010	476449	495562	510080
Northern America and Europe	Overall	2010	1.02455e+06	1.05459e+06	1.06166e+06
Oceania excluding Australia and New Zealand	Overall	2010	611.622	1050.9	1790.44
Sub-Saharan Africa	Overall	2010	89558.8	99049.1	109553
Western Asia and Northern Africa	Overall	2010	367298	377065	385383
Australia and New Zealand	Overall	2011	26898.2	26898.2	26898.2
Central Asia and Southern Asia	Overall	2011	467394	678455	927321
Eastern Asia and South-eastern Asia	Overall	2011	958634	1.21763e+06	1.45905e+06
Latin America & the Caribbean	Overall	2011	483814	503788	517671
Northern America and Europe	Overall	2011	1.02458e+06	1.05783e+06	1.06528e+06
Oceania excluding Australia and New Zealand	Overall	2011	612.103	1063	1849.48
Sub-Saharan Africa	Overall	2011	94071.8	103740	115310
Western Asia and Northern Africa	Overall	2011	376520	386499	394816
Australia and New Zealand	Overall	2012	27289.6	27289.6	27289.6
Central Asia and Southern Asia	Overall	2012	492483	714280	966957
Eastern Asia and South-eastern Asia	Overall	2012	990693	1.26299e+06	1.50556e+06
Latin America & the Caribbean	Overall	2012	491633	512151	525623
Northern America and Europe	Overall	2012	1.02407e+06	1.06007e+06	1.06878e+06
Oceania excluding Australia and New Zealand	Overall	2012	637.927	1084.87	1910.27
Sub-Saharan Africa	Overall	2012	98707.1	109041	120703
Western Asia and Northern Africa	Overall	2012	385191	395879	404389
Australia and New Zealand	Overall	2013	27668.3	27668.3	27668.3
Central Asia and Southern Asia	Overall	2013	512871	752907	1.00207e+06
Eastern Asia and South-eastern Asia	Overall	2013	1.01717e+06	1.31164e+06	1.5627e+06
Latin America & the Caribbean	Overall	2013	500093	520013	534003
Northern America and Europe	Overall	2013	1.0202e+06	1.062e+06	1.07171e+06
Oceania excluding Australia and New Zealand	Overall	2013	615.491	1101.94	2013.5
Sub-Saharan Africa	Overall	2013	104069	114597	126841
Western Asia and Northern Africa	Overall	2013	394597	405260	414283
Australia and New Zealand	Overall	2014	28041.4	28041.4	28041.4
Central Asia and Southern Asia	Overall	2014	547534	788204	1.04188e+06
Eastern Asia and South-eastern Asia	Overall	2014	1.06749e+06	1.35377e+06	1.60769e+06
Latin America & the Caribbean	Overall	2014	508440	528196	541453
Northern America and Europe	Overall	2014	1.01795e+06	1.06348e+06	1.07448e+06
Oceania excluding Australia and New Zealand	Overall	2014	630.375	1120.85	2116.48
Sub-Saharan Africa	Overall	2014	109750	121009	134553
Western Asia and Northern Africa	Overall	2014	403386	414471	423725
Australia and New Zealand	Overall	2015	28414.1	28414.1	28414.1
Central Asia and Southern Asia	Overall	2015	574267	823556	1.08702e+06
Eastern Asia and South-eastern Asia	Overall	2015	1.08861e+06	1.39381e+06	1.65874e+06
Latin America & the Caribbean	Overall	2015	514565	535836	549691
Northern America and Europe	Overall	2015	1.01494e+06	1.06511e+06	1.07756e+06
Oceania excluding Australia and New Zealand	Overall	2015	620.293	1139.08	2233.74
Sub-Saharan Africa	Overall	2015	116152	128281	142453
Western Asia and Northern Africa	Overall	2015	412196	423400	433463
Australia and New Zealand	Overall	2016	28786.7	28786.7	28786.7
Central Asia and Southern Asia	Overall	2016	601329	870625	1.15171e+06
Eastern Asia and South-eastern Asia	Overall	2016	1.1251e+06	1.44056e+06	1.70986e+06
Latin America & the Caribbean	Overall	2016	523801	543241	557215
Northern America and Europe	Overall	2016	1.00971e+06	1.06665e+06	1.08041e+06
Oceania excluding Australia and New Zealand	Overall	2016	607.003	1164.59	2380.2
Sub-Saharan Africa	Overall	2016	122745	136131	152451
Western Asia and Northern Africa	Overall	2016	420487	432278	442643
Australia and New Zealand	Overall	2017	29156.4	29156.4	29156.4
Central Asia and Southern Asia	Overall	2017	635402	914446	1.20198e+06
Eastern Asia and South-eastern Asia	Overall	2017	1.13689e+06	1.47797e+06	1.77284e+06
Latin America & the Caribbean	Overall	2017	530040	550647	564834
Northern America and Europe	Overall	2017	1.00561e+06	1.06746e+06	1.08366e+06
Oceania excluding Australia and New Zealand	Overall	2017	605.055	1182.62	2510.47
Sub-Saharan Africa	Overall	2017	129809	145297	163180
Western Asia and Northern Africa	Overall	2017	427893	441127	452439
Australia and New Zealand	Overall	2018	29521.8	29521.8	29521.8
Central Asia and Southern Asia	Overall	2018	672893	957422	1.2583e+06
Eastern Asia and South-eastern Asia	Overall	2018	1.15168e+06	1.51963e+06	1.82142e+06
Latin America & the Caribbean	Overall	2018	536287	557695	572007
Northern America and Europe	Overall	2018	1.00154e+06	1.06881e+06	1.08625e+06
Oceania excluding Australia and New Zealand	Overall	2018	596.136	1211.64	2666.33
Sub-Saharan Africa	Overall	2018	137731	155159	174699
Western Asia and Northern Africa	Overall	2018	435472	449582	461582
Australia and New Zealand	Overall	2019	29881	29881	29881
Central Asia and Southern Asia	Overall	2019	697536	1.00305e+06	1.3118e+06
Eastern Asia and South-eastern Asia	Overall	2019	1.17443e+06	1.55935e+06	1.86151e+06
Latin America & the Caribbean	Overall	2019	542702	564240	579422
Northern America and Europe	Overall	2019	999266	1.06922e+06	1.08942e+06
Oceania excluding Australia and New Zealand	Overall	2019	599.289	1237.91	2917.52
Sub-Saharan Africa	Overall	2019	145873	165222	187474
Western Asia and Northern Africa	Overall	2019	443257	457917	471855
Australia and New Zealand	Overall	2020	30232.6	30232.6	30232.6
Central Asia and Southern Asia	Overall	2020	726539	1.05169e+06	1.36709e+06
Eastern Asia and South-eastern Asia	Overall	2020	1.17222e+06	1.584e+06	1.91541e+06
Latin America & the Caribbean	Overall	2020	547646	570493	586267
Northern America and Europe	Overall	2020	993504	1.07023e+06	1.09202e+06
Oceania excluding Australia and New Zealand	Overall	2020	584.563	1251.08	3183.28
Sub-Saharan Africa	Overall	2020	153999	175319	201601
Western Asia and Northern Africa	Overall	2020	449838	466103	480560
Australia and New Zealand	Overall	2021	30576.1	30576.1	30576.1
Central Asia and Southern Asia	Overall	2021	750636	1.10527e+06	1.43578e+06
Eastern Asia and South-eastern Asia	Overall	2021	1.1781e+06	1.62911e+06	1.96114e+06
Latin America & the Caribbean	Overall	2021	551130	576274	593168
Northern America and Europe	Overall	2021	990928	1.06989e+06	1.09426e+06
Oceania excluding Australia and New Zealand	Overall	2021	572.887	1278	3432.88
Sub-Saharan Africa	Overall	2021	160841	185356	213026
Western Asia and Northern Africa	Overall	2021	456509	474039	489364
Australia and New Zealand	Overall	2022	30912.2	30912.2	30912.2
Central Asia and Southern Asia	Overall	2022	793047	1.15914e+06	1.48816e+06
Eastern Asia and South-eastern Asia	Overall	2022	1.16343e+06	1.65047e+06	1.9938e+06
Latin America & the Caribbean	Overall	2022	555282	581979	599861
Northern America and Europe	Overall	2022	985889	1.06953e+06	1.09679e+06
Oceania excluding Australia and New Zealand	Overall	2022	570.859	1309.41	3834.97
Sub-Saharan Africa	Overall	2022	168028	195660	227399
Western Asia and Northern Africa	Overall	2022	463259	482037	498635
Australia and New Zealand	Overall	2023	31242	31242	31242
Central Asia and Southern Asia	Overall	2023	808209	1.20853e+06	1.57103e+06
Eastern Asia and South-eastern Asia	Overall	2023	1.16222e+06	1.68444e+06	2.0233e+06
Latin America & the Caribbean	Overall	2023	556435	587319	605775
Northern America and Europe	Overall	2023	981434	1.0683e+06	1.09842e+06
Oceania excluding Australia and New Zealand	Overall	2023	560.51	1302.09	4131.51
Sub-Saharan Africa	Overall	2023	174278	204624	240132
Western Asia and Northern Africa	Overall	2023	468997	489327	507312
Australia and New Zealand	Overall	2024	31567.3	31567.3	31567.3
Central Asia and Southern Asia	Overall	2024	831197	1.2634e+06	1.61516e+06
Eastern Asia and South-eastern Asia	Overall	2024	1.15505e+06	1.70342e+06	2.05409e+06
Latin America & the Caribbean	Overall	2024	559221	591947	611689
Northern America and Europe	Overall	2024	978885	1.06785e+06	1.10136e+06
Oceania excluding Australia and New Zealand	Overall	2024	554.354	1351.99	4316.38
Sub-Saharan Africa	Overall	2024	180103	213737	254352
Western Asia and Northern Africa	Overall	2024	474711	496901	515416
Australia and New Zealand	Overall	2025	31889.4	31889.4	31889.4
Central Asia and Southern Asia	Overall	2025	856119	1.31139e+06	1.67144e+06
Eastern Asia and South-eastern Asia	Overall	2025	1.14447e+06	1.72625e+06	2.08244e+06
Latin America & the Caribbean	Overall	2025	560956	596229	617689
Northern America and Europe	Overall	2025	976985	1.06641e+06	1.10239e+06
Oceania excluding Australia and New Zealand	Overall	2025	531.779	1378.42	4789.58
Sub-Saharan Africa	Overall	2025	186161	222932	268465
Western Asia and Northern Africa	Overall	2025	479052	504144	523639
Australia and New Zealand	Overall	2026	32208.5	32208.5	32208.5
Central Asia and Southern Asia	Overall	2026	908249	1.36756e+06	1.733e+06
Eastern Asia and South-eastern Asia	Overall	2026	1.12463e+06	1.75233e+06	2.10406e+06
Latin America & the Caribbean	Overall	2026	560334	600790	623280
Northern America and Europe	Overall	2026	973283	1.0654e+06	1.10479e+06
Oceania excluding Australia and New Zealand	Overall	2026	519.893	1411.52	5256.64
Sub-Saharan Africa	Overall	2026	191799	231798	280090
Western Asia and Northern Africa	Overall	2026	483945	511243	531617
Australia and New Zealand	Overall	2027	32524.6	32524.6	32524.6
Central Asia and Southern Asia	Overall	2027	919142	1.41155e+06	1.78096e+06
Eastern Asia and South-eastern Asia	Overall	2027	1.12976e+06	1.77588e+06	2.12882e+06
Latin America & the Caribbean	Overall	2027	557903	603995	628320
Northern America and Europe	Overall	2027	972360	1.06363e+06	1.1067e+06
Oceania excluding Australia and New Zealand	Overall	2027	527.997	1449.59	5635.62
Sub-Saharan Africa	Overall	2027	199649	240385	294109
Western Asia and Northern Africa	Overall	2027	487788	517272	539606
Australia and New Zealand	Overall	2028	32837	32837	32837
Central Asia and Southern Asia	Overall	2028	945713	1.45444e+06	1.82479e+06
Eastern Asia and South-eastern Asia	Overall	2028	1.10984e+06	1.78878e+06	2.14653e+06
Latin America & the Caribbean	Overall	2028	556135	607359	633182
Northern America and Europe	Overall	2028	970036	1.06254e+06	1.10787e+06
Oceania excluding Australia and New Zealand	Overall	2028	511.581	1452.39	6036.68
Sub-Saharan Africa	Overall	2028	204531	250151	309031
Western Asia and Northern Africa	Overall	2028	492067	523919	547265
Australia and New Zealand	Overall	2029	33144.9	33144.9	33144.9
Central Asia and Southern Asia	Overall	2029	962066	1.50739e+06	1.87628e+06
Eastern Asia and South-eastern Asia	Overall	2029	1.08157e+06	1.80093e+06	2.16264e+06
Latin America & the Caribbean	Overall	2029	554775	610186	638798
Northern America and Europe	Overall	2029	972015	1.05952e+06	1.10924e+06
Oceania excluding Australia and New Zealand	Overall	2029	507.963	1475.1	6303.12
Sub-Saharan Africa	Overall	2029	207617	259063	322446
Western Asia and Northern Africa	Overall	2029	494728	530010	554469
Australia and New Zealand	Overall	2030	33447.8	33447.8	33447.8
Central Asia and Southern Asia	Overall	2030	997216	1.55737e+06	1.91334e+06
Eastern Asia and South-eastern Asia	Overall	2030	1.06643e+06	1.82165e+06	2.17632e+06
Latin America & the Caribbean	Overall	2030	555006	611987	643174
Northern America and Europe	Overall	2030	970597	1.05735e+06	1.11094e+06
Oceania excluding Australia and New Zealand	Overall	2030	495.254	1515.07	6680.12
Sub-Saharan Africa	Overall	2030	215758	267943	337661
Western Asia and Northern Africa	Overall	2030	498050	535700	562337
World	Urban	1990	1.51467e+06	1.66553e+06	1.77166e+06
World	Urban	1991	1.55932e+06	1.71022e+06	1.81601e+06
World	Urban	1992	1.61271e+06	1.75569e+06	1.85822e+06
World	Urban	1993	1.66065e+06	1.80034e+06	1.9046e+06
World	Urban	1994	1.71072e+06	1.84572e+06	1.94998e+06
World	Urban	1995	1.76566e+06	1.89305e+06	1.99647e+06
World	Urban	1996	1.81773e+06	1.93999e+06	2.04006e+06
World	Urban	1997	1.87029e+06	1.98933e+06	2.09061e+06
World	Urban	1998	1.92981e+06	2.03887e+06	2.13974e+06
World	Urban	1999	1.98718e+06	2.09252e+06	2.19081e+06
World	Urban	2000	2.04055e+06	2.14532e+06	2.24766e+06
World	Urban	2001	2.10049e+06	2.20346e+06	2.30119e+06
World	Urban	2002	2.16286e+06	2.26479e+06	2.36443e+06
World	Urban	2003	2.21992e+06	2.32981e+06	2.43176e+06
World	Urban	2004	2.28412e+06	2.39563e+06	2.50229e+06
World	Urban	2005	2.34569e+06	2.46503e+06	2.56781e+06
World	Urban	2006	2.41762e+06	2.53809e+06	2.64596e+06
World	Urban	2007	2.48235e+06	2.61472e+06	2.72291e+06
World	Urban	2008	2.55681e+06	2.69004e+06	2.80074e+06
World	Urban	2009	2.63411e+06	2.76876e+06	2.88277e+06
World	Urban	2010	2.70125e+06	2.85023e+06	2.96295e+06
World	Urban	2011	2.77239e+06	2.92682e+06	3.03996e+06
World	Urban	2012	2.83124e+06	3.00265e+06	3.12008e+06
World	Urban	2013	2.9095e+06	3.07867e+06	3.20199e+06
World	Urban	2014	2.97373e+06	3.15598e+06	3.28051e+06
World	Urban	2015	3.02845e+06	3.23022e+06	3.35966e+06
World	Urban	2016	3.07057e+06	3.30554e+06	3.44294e+06
World	Urban	2017	3.12388e+06	3.38372e+06	3.53107e+06
World	Urban	2018	3.17445e+06	3.45867e+06	3.61429e+06
World	Urban	2019	3.20864e+06	3.5298e+06	3.69484e+06
World	Urban	2020	3.25409e+06	3.60263e+06	3.77671e+06
World	Urban	2021	3.27641e+06	3.67284e+06	3.84994e+06
World	Urban	2022	3.29452e+06	3.73612e+06	3.9203e+06
World	Urban	2023	3.31544e+06	3.80141e+06	3.99467e+06
World	Urban	2024	3.35773e+06	3.86537e+06	4.06024e+06
World	Urban	2025	3.37335e+06	3.92429e+06	4.13139e+06
World	Urban	2026	3.39307e+06	3.97752e+06	4.19475e+06
World	Urban	2027	3.40569e+06	4.04025e+06	4.25571e+06
World	Urban	2028	3.42655e+06	4.09325e+06	4.31405e+06
World	Urban	2029	3.43467e+06	4.1437e+06	4.3811e+06
World	Urban	2030	3.45623e+06	4.19459e+06	4.43646e+06
World	Rural	1990	524361	768244	1.21778e+06
World	Rural	1991	534269	768754	1.1866e+06
World	Rural	1992	544963	775075	1.16466e+06
World	Rural	1993	557641	781717	1.15062e+06
World	Rural	1994	566403	779324	1.12214e+06
World	Rural	1995	585582	784270	1.097e+06
World	Rural	1996	603576	788700	1.09191e+06
World	Rural	1997	618291	797360	1.08612e+06
World	Rural	1998	633595	799910	1.07066e+06
World	Rural	1999	646533	807686	1.06531e+06
World	Rural	2000	663723	816452	1.06445e+06
World	Rural	2001	674782	825047	1.05401e+06
World	Rural	2002	690064	834915	1.07744e+06
World	Rural	2003	703904	842003	1.05745e+06
World	Rural	2004	718196	855415	1.05703e+06
World	Rural	2005	733496	868865	1.08576e+06
World	Rural	2006	744948	883245	1.08409e+06
World	Rural	2007	762832	898744	1.09305e+06
World	Rural	2008	780090	918239	1.11e+06
World	Rural	2009	794809	939567	1.13737e+06
World	Rural	2010	820419	964313	1.15624e+06
World	Rural	2011	836594	990486	1.18163e+06
World	Rural	2012	861455	1.01982e+06	1.21223e+06
World	Rural	2013	885658	1.04845e+06	1.24745e+06
World	Rural	2014	908365	1.08747e+06	1.29892e+06
World	Rural	2015	938657	1.12132e+06	1.34292e+06
World	Rural	2016	967435	1.1616e+06	1.40403e+06
World	Rural	2017	990462	1.20005e+06	1.45368e+06
World	Rural	2018	1.0059e+06	1.24429e+06	1.51355e+06
World	Rural	2019	1.02683e+06	1.28255e+06	1.5914e+06
World	Rural	2020	1.04372e+06	1.32262e+06	1.64628e+06
World	Rural	2021	1.06407e+06	1.36241e+06	1.71468e+06
World	Rural	2022	1.07764e+06	1.41015e+06	1.76924e+06
World	Rural	2023	1.10233e+06	1.45127e+06	1.82987e+06
World	Rural	2024	1.11681e+06	1.4872e+06	1.88512e+06
World	Rural	2025	1.13119e+06	1.52574e+06	1.92769e+06
World	Rural	2026	1.13152e+06	1.56232e+06	1.98293e+06
World	Rural	2027	1.14923e+06	1.5985e+06	2.02047e+06
World	Rural	2028	1.1556e+06	1.63097e+06	2.05834e+06
World	Rural	2029	1.17472e+06	1.65855e+06	2.08409e+06
World	Rural	2030	1.17782e+06	1.68956e+06	2.10938e+06
World	Overall	1990	2.12219e+06	2.47216e+06	2.9108e+06
World	Overall	1991	2.17154e+06	2.52741e+06	2.94137e+06
World	Overall	1992	2.24999e+06	2.57141e+06	2.95499e+06
World	Overall	1993	2.30495e+06	2.62597e+06	2.99756e+06
World	Overall	1994	2.37123e+06	2.67531e+06	3.02309e+06
World	Overall	1995	2.42029e+06	2.72665e+06	3.04399e+06
World	Overall	1996	2.48038e+06	2.7845e+06	3.09211e+06
World	Overall	1997	2.54604e+06	2.84294e+06	3.13985e+06
World	Overall	1998	2.62355e+06	2.90494e+06	3.18716e+06
World	Overall	1999	2.67311e+06	2.96541e+06	3.24466e+06
World	Overall	2000	2.74296e+06	3.02988e+06	3.32064e+06
World	Overall	2001	2.82808e+06	3.10169e+06	3.38996e+06
World	Overall	2002	2.89593e+06	3.17667e+06	3.45822e+06
World	Overall	2003	2.9539e+06	3.24951e+06	3.53467e+06
World	Overall	2004	3.02881e+06	3.32707e+06	3.61624e+06
World	Overall	2005	3.10155e+06	3.40858e+06	3.71089e+06
World	Overall	2006	3.20193e+06	3.49566e+06	3.80726e+06
World	Overall	2007	3.27911e+06	3.5884e+06	3.90053e+06
World	Overall	2008	3.372e+06	3.6852e+06	4.01062e+06
World	Overall	2009	3.45695e+06	3.77922e+06	4.10115e+06
World	Overall	2010	3.54852e+06	3.87756e+06	4.21132e+06
World	Overall	2011	3.62686e+06	3.97048e+06	4.30978e+06
World	Overall	2012	3.71692e+06	4.07951e+06	4.42004e+06
World	Overall	2013	3.82223e+06	4.19021e+06	4.53231e+06
World	Overall	2014	3.91121e+06	4.29542e+06	4.66504e+06
World	Overall	2015	4.00093e+06	4.39329e+06	4.76914e+06
World	Overall	2016	4.08462e+06	4.51056e+06	4.89408e+06
World	Overall	2017	4.18645e+06	4.61577e+06	5.02245e+06
World	Overall	2018	4.25601e+06	4.73509e+06	5.16026e+06
World	Overall	2019	4.35184e+06	4.84134e+06	5.28199e+06
World	Overall	2020	4.41356e+06	4.93445e+06	5.40357e+06
World	Overall	2021	4.48957e+06	5.04883e+06	5.54981e+06
World	Overall	2022	4.54103e+06	5.15428e+06	5.64604e+06
World	Overall	2023	4.61768e+06	5.25227e+06	5.78401e+06
World	Overall	2024	4.66771e+06	5.34061e+06	5.87503e+06
World	Overall	2025	4.70543e+06	5.43347e+06	5.96481e+06
World	Overall	2026	4.79103e+06	5.52138e+06	6.09164e+06
World	Overall	2027	4.82179e+06	5.60116e+06	6.18672e+06
World	Overall	2028	4.86096e+06	5.67405e+06	6.29431e+06
World	Overall	2029	4.88828e+06	5.75047e+06	6.3581e+06
World	Overall	2030	4.96479e+06	5.81994e+06	6.4415e+06

## Sheet: Polluting (%)
region	area	year	percent_lower95	percent_median	percent_upper95
Australia and New Zealand	Urban	1990	0	0	0
Central Asia and Southern Asia	Urban	1990	0.489072	0.577546	0.662396
Eastern Asia and South-eastern Asia	Urban	1990	0.200506	0.355957	0.605845
Latin America & the Caribbean	Urban	1990	0.0857917	0.123786	0.181049
Northern America and Europe	Urban	1990	0.00466861	0.0129325	0.0373434
Oceania excluding Australia and New Zealand	Urban	1990	0.3426	0.652611	0.83713
Sub-Saharan Africa	Urban	1990	0.668329	0.749012	0.800776
Western Asia and Northern Africa	Urban	1990	0.067841	0.128609	0.255003
Australia and New Zealand	Urban	1991	0	0	0
Central Asia and Southern Asia	Urban	1991	0.479504	0.565895	0.648308
Eastern Asia and South-eastern Asia	Urban	1991	0.203426	0.357725	0.598387
Latin America & the Caribbean	Urban	1991	0.0823321	0.115919	0.167579
Northern America and Europe	Urban	1991	0.00459273	0.0123974	0.0339612
Oceania excluding Australia and New Zealand	Urban	1991	0.350479	0.645573	0.823829
Sub-Saharan Africa	Urban	1991	0.675619	0.749423	0.799138
Western Asia and Northern Africa	Urban	1991	0.0664164	0.121921	0.242062
Australia and New Zealand	Urban	1992	0	0	0
Central Asia and Southern Asia	Urban	1992	0.467078	0.551337	0.630609
Eastern Asia and South-eastern Asia	Urban	1992	0.210048	0.360189	0.581009
Latin America & the Caribbean	Urban	1992	0.0781662	0.109279	0.155907
Northern America and Europe	Urban	1992	0.00457997	0.0116764	0.0311044
Oceania excluding Australia and New Zealand	Urban	1992	0.359349	0.641691	0.815803
Sub-Saharan Africa	Urban	1992	0.683788	0.750841	0.796765
Western Asia and Northern Africa	Urban	1992	0.0669216	0.116095	0.223231
Australia and New Zealand	Urban	1993	0	0	0
Central Asia and Southern Asia	Urban	1993	0.457098	0.536816	0.614895
Eastern Asia and South-eastern Asia	Urban	1993	0.215983	0.359406	0.566697
Latin America & the Caribbean	Urban	1993	0.0756009	0.102625	0.148615
Northern America and Europe	Urban	1993	0.00457259	0.0110685	0.0289085
Oceania excluding Australia and New Zealand	Urban	1993	0.363549	0.630733	0.805152
Sub-Saharan Africa	Urban	1993	0.691663	0.751474	0.793138
Western Asia and Northern Africa	Urban	1993	0.0662307	0.109879	0.201711
Australia and New Zealand	Urban	1994	0	0	0
Central Asia and Southern Asia	Urban	1994	0.443355	0.52285	0.600404
Eastern Asia and South-eastern Asia	Urban	1994	0.217543	0.359702	0.54891
Latin America & the Caribbean	Urban	1994	0.0719071	0.0973502	0.138663
Northern America and Europe	Urban	1994	0.00413627	0.0103662	0.0265027
Oceania excluding Australia and New Zealand	Urban	1994	0.37213	0.626136	0.799341
Sub-Saharan Africa	Urban	1994	0.699958	0.752241	0.791178
Western Asia and Northern Africa	Urban	1994	0.0631615	0.103527	0.187836
Australia and New Zealand	Urban	1995	0	0	0
Central Asia and Southern Asia	Urban	1995	0.429648	0.507555	0.586856
Eastern Asia and South-eastern Asia	Urban	1995	0.221758	0.357209	0.528758
Latin America & the Caribbean	Urban	1995	0.0682047	0.0925068	0.135766
Northern America and Europe	Urban	1995	0.00420121	0.00981334	0.0239273
Oceania excluding Australia and New Zealand	Urban	1995	0.372759	0.619184	0.791099
Sub-Saharan Africa	Urban	1995	0.703432	0.753069	0.790496
Western Asia and Northern Africa	Urban	1995	0.0617825	0.0985483	0.173908
Australia and New Zealand	Urban	1996	0	0	0
Central Asia and Southern Asia	Urban	1996	0.413742	0.49303	0.569256
Eastern Asia and South-eastern Asia	Urban	1996	0.22838	0.357831	0.519119
Latin America & the Caribbean	Urban	1996	0.0650931	0.0869378	0.123603
Northern America and Europe	Urban	1996	0.00399057	0.00929405	0.0227526
Oceania excluding Australia and New Zealand	Urban	1996	0.380326	0.612408	0.78072
Sub-Saharan Africa	Urban	1996	0.708093	0.752701	0.787099
Western Asia and Northern Africa	Urban	1996	0.060379	0.0923578	0.16138
Australia and New Zealand	Urban	1997	0	0	0
Central Asia and Southern Asia	Urban	1997	0.398383	0.477384	0.552573
Eastern Asia and South-eastern Asia	Urban	1997	0.224719	0.354948	0.504455
Latin America & the Caribbean	Urban	1997	0.061992	0.0823406	0.119765
Northern America and Europe	Urban	1997	0.00388235	0.00868311	0.0201095
Oceania excluding Australia and New Zealand	Urban	1997	0.381067	0.606396	0.773265
Sub-Saharan Africa	Urban	1997	0.712689	0.753814	0.786412
Western Asia and Northern Africa	Urban	1997	0.0574927	0.0867636	0.148044
Australia and New Zealand	Urban	1998	0	0	0
Central Asia and Southern Asia	Urban	1998	0.384236	0.459276	0.539885
Eastern Asia and South-eastern Asia	Urban	1998	0.233162	0.352323	0.489213
Latin America & the Caribbean	Urban	1998	0.0587664	0.0787694	0.115036
Northern America and Europe	Urban	1998	0.00371701	0.00814578	0.018493
Oceania excluding Australia and New Zealand	Urban	1998	0.384884	0.603035	0.76408
Sub-Saharan Africa	Urban	1998	0.716572	0.753347	0.78468
Western Asia and Northern Africa	Urban	1998	0.0543402	0.0809928	0.13306
Australia and New Zealand	Urban	1999	0	0	0
Central Asia and Southern Asia	Urban	1999	0.365901	0.442034	0.519211
Eastern Asia and South-eastern Asia	Urban	1999	0.2296	0.349504	0.475736
Latin America & the Caribbean	Urban	1999	0.0557037	0.0737261	0.109536
Northern America and Europe	Urban	1999	0.00373592	0.00761633	0.0178409
Oceania excluding Australia and New Zealand	Urban	1999	0.387955	0.600561	0.760283
Sub-Saharan Africa	Urban	1999	0.719443	0.753054	0.783133
Western Asia and Northern Africa	Urban	1999	0.0518764	0.0756803	0.124413
Australia and New Zealand	Urban	2000	0	0	0
Central Asia and Southern Asia	Urban	2000	0.349533	0.423956	0.501157
Eastern Asia and South-eastern Asia	Urban	2000	0.230426	0.345911	0.466044
Latin America & the Caribbean	Urban	2000	0.0532067	0.0702966	0.106258
Northern America and Europe	Urban	2000	0.00362026	0.00719297	0.0169669
Oceania excluding Australia and New Zealand	Urban	2000	0.395033	0.591528	0.751634
Sub-Saharan Africa	Urban	2000	0.721318	0.752489	0.781114
Western Asia and Northern Africa	Urban	2000	0.0492984	0.0708052	0.110751
Australia and New Zealand	Urban	2001	0	0	0
Central Asia and Southern Asia	Urban	2001	0.333865	0.407399	0.487064
Eastern Asia and South-eastern Asia	Urban	2001	0.234538	0.337864	0.458373
Latin America & the Caribbean	Urban	2001	0.0507635	0.0670781	0.101544
Northern America and Europe	Urban	2001	0.00347806	0.00680773	0.0159969
Oceania excluding Australia and New Zealand	Urban	2001	0.389179	0.588385	0.744797
Sub-Saharan Africa	Urban	2001	0.72238	0.751704	0.779646
Western Asia and Northern Africa	Urban	2001	0.0468369	0.0655799	0.100863
Australia and New Zealand	Urban	2002	0	0	0
Central Asia and Southern Asia	Urban	2002	0.316344	0.391297	0.468797
Eastern Asia and South-eastern Asia	Urban	2002	0.227664	0.330444	0.44448
Latin America & the Caribbean	Urban	2002	0.0480773	0.0641515	0.0982868
Northern America and Europe	Urban	2002	0.00345467	0.00653987	0.0168165
Oceania excluding Australia and New Zealand	Urban	2002	0.398042	0.584988	0.739277
Sub-Saharan Africa	Urban	2002	0.723038	0.750834	0.777377
Western Asia and Northern Africa	Urban	2002	0.0437163	0.0615549	0.0919962
Australia and New Zealand	Urban	2003	0	0	0
Central Asia and Southern Asia	Urban	2003	0.298604	0.374928	0.451507
Eastern Asia and South-eastern Asia	Urban	2003	0.215914	0.323282	0.439068
Latin America & the Caribbean	Urban	2003	0.046529	0.0624482	0.0951337
Northern America and Europe	Urban	2003	0.00329105	0.00629826	0.0180238
Oceania excluding Australia and New Zealand	Urban	2003	0.404195	0.580586	0.731603
Sub-Saharan Africa	Urban	2003	0.724066	0.749706	0.776545
Western Asia and Northern Africa	Urban	2003	0.0407934	0.0574322	0.085863
Australia and New Zealand	Urban	2004	0	0	0
Central Asia and Southern Asia	Urban	2004	0.284603	0.359597	0.439698
Eastern Asia and South-eastern Asia	Urban	2004	0.206626	0.312988	0.427204
Latin America & the Caribbean	Urban	2004	0.044692	0.0598418	0.0912813
Northern America and Europe	Urban	2004	0.00326756	0.0060819	0.0183889
Oceania excluding Australia and New Zealand	Urban	2004	0.413509	0.57837	0.722028
Sub-Saharan Africa	Urban	2004	0.72299	0.748166	0.772944
Western Asia and Northern Africa	Urban	2004	0.0386119	0.0535457	0.0789789
Australia and New Zealand	Urban	2005	0	0	0
Central Asia and Southern Asia	Urban	2005	0.269294	0.346326	0.430065
Eastern Asia and South-eastern Asia	Urban	2005	0.202989	0.301996	0.417167
Latin America & the Caribbean	Urban	2005	0.0435208	0.0584516	0.0901047
Northern America and Europe	Urban	2005	0.00321432	0.00591138	0.0190081
Oceania excluding Australia and New Zealand	Urban	2005	0.416811	0.573308	0.714673
Sub-Saharan Africa	Urban	2005	0.722779	0.74662	0.771611
Western Asia and Northern Africa	Urban	2005	0.0351704	0.0496214	0.0716203
Australia and New Zealand	Urban	2006	0	0	0
Central Asia and Southern Asia	Urban	2006	0.255624	0.332508	0.409579
Eastern Asia and South-eastern Asia	Urban	2006	0.188532	0.290126	0.403898
Latin America & the Caribbean	Urban	2006	0.0425018	0.0568331	0.0892948
Northern America and Europe	Urban	2006	0.00311756	0.00601552	0.0213985
Oceania excluding Australia and New Zealand	Urban	2006	0.414714	0.571617	0.70261
Sub-Saharan Africa	Urban	2006	0.72284	0.745162	0.769094
Western Asia and Northern Africa	Urban	2006	0.0328893	0.0460062	0.0664719
Australia and New Zealand	Urban	2007	0	0	0
Central Asia and Southern Asia	Urban	2007	0.240222	0.316146	0.398015
Eastern Asia and South-eastern Asia	Urban	2007	0.177197	0.274562	0.391928
Latin America & the Caribbean	Urban	2007	0.0417849	0.0556963	0.0865764
Northern America and Europe	Urban	2007	0.00309573	0.00601386	0.0230354
Oceania excluding Australia and New Zealand	Urban	2007	0.424708	0.5702	0.694738
Sub-Saharan Africa	Urban	2007	0.721319	0.743313	0.765636
Western Asia and Northern Africa	Urban	2007	0.0299053	0.0425099	0.0623847
Australia and New Zealand	Urban	2008	0	0	0
Central Asia and Southern Asia	Urban	2008	0.228145	0.302441	0.386187
Eastern Asia and South-eastern Asia	Urban	2008	0.16395	0.260615	0.379999
Latin America & the Caribbean	Urban	2008	0.0408633	0.0544928	0.0844974
Northern America and Europe	Urban	2008	0.00303582	0.00626228	0.0250422
Oceania excluding Australia and New Zealand	Urban	2008	0.423981	0.571535	0.696622
Sub-Saharan Africa	Urban	2008	0.721001	0.741904	0.764125
Western Asia and Northern Africa	Urban	2008	0.0273985	0.0394451	0.0589042
Australia and New Zealand	Urban	2009	0	0	0
Central Asia and Southern Asia	Urban	2009	0.21511	0.289954	0.377257
Eastern Asia and South-eastern Asia	Urban	2009	0.153544	0.245562	0.365324
Latin America & the Caribbean	Urban	2009	0.0404846	0.0541893	0.0824938
Northern America and Europe	Urban	2009	0.00304487	0.00664258	0.0281381
Oceania excluding Australia and New Zealand	Urban	2009	0.424208	0.568274	0.693094
Sub-Saharan Africa	Urban	2009	0.719235	0.740466	0.762875
Western Asia and Northern Africa	Urban	2009	0.025366	0.0368895	0.0549846
Australia and New Zealand	Urban	2010	0	0	0
Central Asia and Southern Asia	Urban	2010	0.204594	0.277386	0.36162
Eastern Asia and South-eastern Asia	Urban	2010	0.137581	0.231565	0.34982
Latin America & the Caribbean	Urban	2010	0.0402974	0.0536057	0.0810092
Northern America and Europe	Urban	2010	0.00302638	0.006972	0.0322214
Oceania excluding Australia and New Zealand	Urban	2010	0.410494	0.568393	0.694028
Sub-Saharan Africa	Urban	2010	0.716753	0.738059	0.759417
Western Asia and Northern Africa	Urban	2010	0.0232835	0.0345703	0.0527038
Australia and New Zealand	Urban	2011	0	0	0
Central Asia and Southern Asia	Urban	2011	0.188136	0.265015	0.352
Eastern Asia and South-eastern Asia	Urban	2011	0.12948	0.218166	0.345626
Latin America & the Caribbean	Urban	2011	0.039773	0.0533248	0.0813981
Northern America and Europe	Urban	2011	0.0030767	0.00757699	0.0349806
Oceania excluding Australia and New Zealand	Urban	2011	0.414686	0.570259	0.702627
Sub-Saharan Africa	Urban	2011	0.715254	0.736024	0.757497
Western Asia and Northern Africa	Urban	2011	0.0215536	0.0329233	0.0508111
Australia and New Zealand	Urban	2012	0	0	0
Central Asia and Southern Asia	Urban	2012	0.177333	0.252863	0.342775
Eastern Asia and South-eastern Asia	Urban	2012	0.113523	0.207421	0.344488
Latin America & the Caribbean	Urban	2012	0.0397485	0.053461	0.079563
Northern America and Europe	Urban	2012	0.0029534	0.00829519	0.0413665
Oceania excluding Australia and New Zealand	Urban	2012	0.410076	0.570041	0.711599
Sub-Saharan Africa	Urban	2012	0.711695	0.732727	0.75416
Western Asia and Northern Africa	Urban	2012	0.0200639	0.0312907	0.0493674
Australia and New Zealand	Urban	2013	0	0	0
Central Asia and Southern Asia	Urban	2013	0.167026	0.240609	0.331548
Eastern Asia and South-eastern Asia	Urban	2013	0.102817	0.196535	0.33288
Latin America & the Caribbean	Urban	2013	0.0394859	0.0533846	0.0794504
Northern America and Europe	Urban	2013	0.0031307	0.00898092	0.0457952
Oceania excluding Australia and New Zealand	Urban	2013	0.397298	0.576614	0.718324
Sub-Saharan Africa	Urban	2013	0.707418	0.728703	0.74994
Western Asia and Northern Africa	Urban	2013	0.0191656	0.0304859	0.0484355
Australia and New Zealand	Urban	2014	0	0	0
Central Asia and Southern Asia	Urban	2014	0.157011	0.227417	0.317335
Eastern Asia and South-eastern Asia	Urban	2014	0.0939778	0.187342	0.335817
Latin America & the Caribbean	Urban	2014	0.0398513	0.0535156	0.0803974
Northern America and Europe	Urban	2014	0.0030969	0.0100513	0.0516255
Oceania excluding Australia and New Zealand	Urban	2014	0.388916	0.577711	0.729095
Sub-Saharan Africa	Urban	2014	0.699285	0.72289	0.745061
Western Asia and Northern Africa	Urban	2014	0.0180272	0.0291864	0.0472704
Australia and New Zealand	Urban	2015	0	0	0
Central Asia and Southern Asia	Urban	2015	0.14531	0.216388	0.308924
Eastern Asia and South-eastern Asia	Urban	2015	0.0876156	0.179864	0.339727
Latin America & the Caribbean	Urban	2015	0.039135	0.0538047	0.0815006
Northern America and Europe	Urban	2015	0.00323459	0.010977	0.0592647
Oceania excluding Australia and New Zealand	Urban	2015	0.379378	0.580305	0.742033
Sub-Saharan Africa	Urban	2015	0.692326	0.716077	0.738584
Western Asia and Northern Africa	Urban	2015	0.0168685	0.0290076	0.0473239
Australia and New Zealand	Urban	2016	0	0	0
Central Asia and Southern Asia	Urban	2016	0.129487	0.20467	0.314418
Eastern Asia and South-eastern Asia	Urban	2016	0.0783004	0.174672	0.346707
Latin America & the Caribbean	Urban	2016	0.0400491	0.0543886	0.0827249
Northern America and Europe	Urban	2016	0.00317538	0.0123147	0.0629432
Oceania excluding Australia and New Zealand	Urban	2016	0.367561	0.584574	0.752541
Sub-Saharan Africa	Urban	2016	0.682068	0.707053	0.731799
Western Asia and Northern Africa	Urban	2016	0.0159104	0.0282423	0.04804
Australia and New Zealand	Urban	2017	0	0	0
Central Asia and Southern Asia	Urban	2017	0.119307	0.194323	0.304106
Eastern Asia and South-eastern Asia	Urban	2017	0.0694301	0.166069	0.360331
Latin America & the Caribbean	Urban	2017	0.0392917	0.0547586	0.0818466
Northern America and Europe	Urban	2017	0.00333019	0.0133316	0.0738902
Oceania excluding Australia and New Zealand	Urban	2017	0.351665	0.589902	0.768377
Sub-Saharan Africa	Urban	2017	0.670192	0.698877	0.725779
Western Asia and Northern Africa	Urban	2017	0.0148319	0.0281787	0.0478591
Australia and New Zealand	Urban	2018	0	0	0
Central Asia and Southern Asia	Urban	2018	0.108336	0.184454	0.304576
Eastern Asia and South-eastern Asia	Urban	2018	0.0636025	0.159719	0.367338
Latin America & the Caribbean	Urban	2018	0.0395875	0.0552014	0.0849369
Northern America and Europe	Urban	2018	0.00330959	0.0147513	0.0844097
Oceania excluding Australia and New Zealand	Urban	2018	0.342214	0.589975	0.77858
Sub-Saharan Africa	Urban	2018	0.657836	0.688269	0.71789
Western Asia and Northern Africa	Urban	2018	0.0141195	0.0283367	0.0498334
Australia and New Zealand	Urban	2019	0	0	0
Central Asia and Southern Asia	Urban	2019	0.0985897	0.174951	0.303028
Eastern Asia and South-eastern Asia	Urban	2019	0.0570948	0.155794	0.383232
Latin America & the Caribbean	Urban	2019	0.0387609	0.056431	0.0896231
Northern America and Europe	Urban	2019	0.00334335	0.0161035	0.091882
Oceania excluding Australia and New Zealand	Urban	2019	0.33398	0.599535	0.793464
Sub-Saharan Africa	Urban	2019	0.643476	0.67897	0.711647
Western Asia and Northern Africa	Urban	2019	0.0133613	0.0286342	0.0510792
Australia and New Zealand	Urban	2020	0	0	0
Central Asia and Southern Asia	Urban	2020	0.0887518	0.16713	0.307664
Eastern Asia and South-eastern Asia	Urban	2020	0.0509311	0.150075	0.402791
Latin America & the Caribbean	Urban	2020	0.0396265	0.0577594	0.0922746
Northern America and Europe	Urban	2020	0.00358039	0.0180841	0.0970644
Oceania excluding Australia and New Zealand	Urban	2020	0.32854	0.604115	0.803722
Sub-Saharan Africa	Urban	2020	0.629685	0.670304	0.707956
Western Asia and Northern Africa	Urban	2020	0.0131525	0.0293055	0.0531934
Australia and New Zealand	Urban	2021	0	0	0
Central Asia and Southern Asia	Urban	2021	0.081071	0.15847	0.309955
Eastern Asia and South-eastern Asia	Urban	2021	0.0472517	0.145529	0.426544
Latin America & the Caribbean	Urban	2021	0.0394802	0.0596955	0.0971563
Northern America and Europe	Urban	2021	0.00351892	0.019316	0.10459
Oceania excluding Australia and New Zealand	Urban	2021	0.310788	0.609326	0.818299
Sub-Saharan Africa	Urban	2021	0.620571	0.664449	0.704736
Western Asia and Northern Africa	Urban	2021	0.0123013	0.0297939	0.0577679
Australia and New Zealand	Urban	2022	0	0	0
Central Asia and Southern Asia	Urban	2022	0.0744121	0.151771	0.309323
Eastern Asia and South-eastern Asia	Urban	2022	0.04429	0.14134	0.446885
Latin America & the Caribbean	Urban	2022	0.0385758	0.0613009	0.102672
Northern America and Europe	Urban	2022	0.00378687	0.0219305	0.110015
Oceania excluding Australia and New Zealand	Urban	2022	0.304544	0.616295	0.826132
Sub-Saharan Africa	Urban	2022	0.610006	0.659339	0.702382
Western Asia and Northern Africa	Urban	2022	0.0120492	0.0311688	0.0605898
Australia and New Zealand	Urban	2023	0	0	0
Central Asia and Southern Asia	Urban	2023	0.0678084	0.145444	0.314275
Eastern Asia and South-eastern Asia	Urban	2023	0.0412447	0.137196	0.468478
Latin America & the Caribbean	Urban	2023	0.0399511	0.0641078	0.108432
Northern America and Europe	Urban	2023	0.00379218	0.0248138	0.117737
Oceania excluding Australia and New Zealand	Urban	2023	0.298101	0.623732	0.839172
Sub-Saharan Africa	Urban	2023	0.6045	0.656336	0.704063
Western Asia and Northern Africa	Urban	2023	0.0121142	0.0320278	0.0662266
Australia and New Zealand	Urban	2024	0	0	0
Central Asia and Southern Asia	Urban	2024	0.0621731	0.139065	0.320152
Eastern Asia and South-eastern Asia	Urban	2024	0.0388447	0.133694	0.474565
Latin America & the Caribbean	Urban	2024	0.039455	0.0661351	0.117467
Northern America and Europe	Urban	2024	0.0040101	0.0272638	0.120233
Oceania excluding Australia and New Zealand	Urban	2024	0.289757	0.631237	0.846176
Sub-Saharan Africa	Urban	2024	0.595969	0.654258	0.704324
Western Asia and Northern Africa	Urban	2024	0.0121283	0.0334634	0.0719103
Australia and New Zealand	Urban	2025	0	0	0
Central Asia and Southern Asia	Urban	2025	0.0585526	0.132584	0.328478
Eastern Asia and South-eastern Asia	Urban	2025	0.0364776	0.130933	0.502248
Latin America & the Caribbean	Urban	2025	0.0404658	0.0690987	0.127276
Northern America and Europe	Urban	2025	0.00425956	0.0304112	0.122786
Oceania excluding Australia and New Zealand	Urban	2025	0.286463	0.640766	0.861003
Sub-Saharan Africa	Urban	2025	0.591732	0.653826	0.70899
Western Asia and Northern Africa	Urban	2025	0.0125557	0.0352079	0.0760733
Australia and New Zealand	Urban	2026	0	0	0
Central Asia and Southern Asia	Urban	2026	0.0536463	0.129126	0.334307
Eastern Asia and South-eastern Asia	Urban	2026	0.035572	0.131501	0.515347
Latin America & the Caribbean	Urban	2026	0.0400631	0.0722168	0.135939
Northern America and Europe	Urban	2026	0.00429067	0.032806	0.12559
Oceania excluding Australia and New Zealand	Urban	2026	0.278255	0.646002	0.867434
Sub-Saharan Africa	Urban	2026	0.589567	0.654376	0.712961
Western Asia and Northern Africa	Urban	2026	0.0124085	0.0371313	0.0835261
Australia and New Zealand	Urban	2027	0	0	0
Central Asia and Southern Asia	Urban	2027	0.0496952	0.126998	0.344275
Eastern Asia and South-eastern Asia	Urban	2027	0.0335629	0.12642	0.531467
Latin America & the Caribbean	Urban	2027	0.0408898	0.0750394	0.149878
Northern America and Europe	Urban	2027	0.00446443	0.0356172	0.126615
Oceania excluding Australia and New Zealand	Urban	2027	0.27157	0.656823	0.879081
Sub-Saharan Africa	Urban	2027	0.587066	0.656426	0.716539
Western Asia and Northern Africa	Urban	2027	0.0123761	0.0392268	0.0936398
Australia and New Zealand	Urban	2028	0	0	0
Central Asia and Southern Asia	Urban	2028	0.0464546	0.121777	0.350471
Eastern Asia and South-eastern Asia	Urban	2028	0.032042	0.125529	0.550609
Latin America & the Caribbean	Urban	2028	0.0422792	0.0786875	0.158865
Northern America and Europe	Urban	2028	0.00457583	0.0401086	0.127896
Oceania excluding Australia and New Zealand	Urban	2028	0.26976	0.661209	0.882212
Sub-Saharan Africa	Urban	2028	0.585149	0.657697	0.720727
Western Asia and Northern Africa	Urban	2028	0.0126783	0.0411783	0.0994401
Australia and New Zealand	Urban	2029	0	0	0
Central Asia and Southern Asia	Urban	2029	0.0433151	0.120716	0.350593
Eastern Asia and South-eastern Asia	Urban	2029	0.0297692	0.124941	0.565044
Latin America & the Caribbean	Urban	2029	0.0431304	0.0833828	0.170786
Northern America and Europe	Urban	2029	0.00465672	0.0425734	0.128548
Oceania excluding Australia and New Zealand	Urban	2029	0.261127	0.670329	0.893923
Sub-Saharan Africa	Urban	2029	0.582738	0.659503	0.723945
Western Asia and Northern Africa	Urban	2029	0.0129897	0.0445865	0.107754
Australia and New Zealand	Urban	2030	0	0	0
Central Asia and Southern Asia	Urban	2030	0.0410066	0.116507	0.366211
Eastern Asia and South-eastern Asia	Urban	2030	0.0286682	0.122622	0.581064
Latin America & the Caribbean	Urban	2030	0.043807	0.0864938	0.184614
Northern America and Europe	Urban	2030	0.00510389	0.0467682	0.129483
Oceania excluding Australia and New Zealand	Urban	2030	0.253184	0.674254	0.899851
Sub-Saharan Africa	Urban	2030	0.58116	0.662548	0.72727
Western Asia and Northern Africa	Urban	2030	0.0137985	0.0478801	0.118742
Australia and New Zealand	Rural	1990	0	0	0
Central Asia and Southern Asia	Rural	1990	0.903083	0.935128	0.960595
Eastern Asia and South-eastern Asia	Rural	1990	0.367645	0.734324	0.935128
Latin America & the Caribbean	Rural	1990	0.591481	0.684791	0.764539
Northern America and Europe	Rural	1990	0.0437655	0.0803833	0.122515
Oceania excluding Australia and New Zealand	Rural	1990	0.819113	0.943251	0.978622
Sub-Saharan Africa	Rural	1990	0.921688	0.96319	0.979758
Western Asia and Northern Africa	Rural	1990	0.329577	0.470407	0.60804
Australia and New Zealand	Rural	1991	0	0	0
Central Asia and Southern Asia	Rural	1991	0.903105	0.933944	0.95811
Eastern Asia and South-eastern Asia	Rural	1991	0.393462	0.741539	0.932474
Latin America & the Caribbean	Rural	1991	0.587589	0.675122	0.755487
Northern America and Europe	Rural	1991	0.042934	0.078406	0.118126
Oceania excluding Australia and New Zealand	Rural	1991	0.836586	0.944518	0.978494
Sub-Saharan Africa	Rural	1991	0.928231	0.96547	0.980358
Western Asia and Northern Africa	Rural	1991	0.328655	0.460729	0.594665
Australia and New Zealand	Rural	1992	0	0	0
Central Asia and Southern Asia	Rural	1992	0.900266	0.931989	0.955476
Eastern Asia and South-eastern Asia	Rural	1992	0.422885	0.739461	0.927395
Latin America & the Caribbean	Rural	1992	0.584442	0.665649	0.739455
Northern America and Europe	Rural	1992	0.0426522	0.0768941	0.115871
Oceania excluding Australia and New Zealand	Rural	1992	0.845054	0.945121	0.978483
Sub-Saharan Africa	Rural	1992	0.932381	0.966976	0.980716
Western Asia and Northern Africa	Rural	1992	0.326976	0.450653	0.577009
Australia and New Zealand	Rural	1993	0	0	0
Central Asia and Southern Asia	Rural	1993	0.900791	0.929888	0.952937
Eastern Asia and South-eastern Asia	Rural	1993	0.442751	0.739936	0.921862
Latin America & the Caribbean	Rural	1993	0.577686	0.652957	0.728601
Northern America and Europe	Rural	1993	0.0427093	0.0755066	0.112547
Oceania excluding Australia and New Zealand	Rural	1993	0.85274	0.946157	0.977997
Sub-Saharan Africa	Rural	1993	0.938066	0.968493	0.980546
Western Asia and Northern Africa	Rural	1993	0.318937	0.438462	0.556737
Australia and New Zealand	Rural	1994	0	0	0
Central Asia and Southern Asia	Rural	1994	0.897505	0.927432	0.950466
Eastern Asia and South-eastern Asia	Rural	1994	0.468902	0.747255	0.920513
Latin America & the Caribbean	Rural	1994	0.568064	0.643333	0.719527
Northern America and Europe	Rural	1994	0.0413254	0.074251	0.107985
Oceania excluding Australia and New Zealand	Rural	1994	0.862293	0.948106	0.978218
Sub-Saharan Africa	Rural	1994	0.943489	0.969414	0.981438
Western Asia and Northern Africa	Rural	1994	0.319001	0.427177	0.542793
Australia and New Zealand	Rural	1995	0	0	0
Central Asia and Southern Asia	Rural	1995	0.894009	0.925181	0.947795
Eastern Asia and South-eastern Asia	Rural	1995	0.492024	0.751861	0.912279
Latin America & the Caribbean	Rural	1995	0.560323	0.632684	0.705663
Northern America and Europe	Rural	1995	0.0415246	0.0720216	0.103967
Oceania excluding Australia and New Zealand	Rural	1995	0.867004	0.949231	0.978054
Sub-Saharan Africa	Rural	1995	0.945488	0.970304	0.98115
Western Asia and Northern Africa	Rural	1995	0.313727	0.411929	0.518558
Australia and New Zealand	Rural	1996	0	0	0
Central Asia and Southern Asia	Rural	1996	0.890061	0.922389	0.94492
Eastern Asia and South-eastern Asia	Rural	1996	0.503652	0.753581	0.905432
Latin America & the Caribbean	Rural	1996	0.55018	0.621216	0.694773
Northern America and Europe	Rural	1996	0.0400771	0.0702604	0.100058
Oceania excluding Australia and New Zealand	Rural	1996	0.871166	0.950522	0.97826
Sub-Saharan Africa	Rural	1996	0.947871	0.971057	0.981602
Western Asia and Northern Africa	Rural	1996	0.30874	0.396502	0.497203
Australia and New Zealand	Rural	1997	0	0	0
Central Asia and Southern Asia	Rural	1997	0.883518	0.917992	0.941977
Eastern Asia and South-eastern Asia	Rural	1997	0.517576	0.754036	0.901791
Latin America & the Caribbean	Rural	1997	0.541482	0.611242	0.681509
Northern America and Europe	Rural	1997	0.0395424	0.0678842	0.0976238
Oceania excluding Australia and New Zealand	Rural	1997	0.878346	0.951531	0.978051
Sub-Saharan Africa	Rural	1997	0.951946	0.971403	0.980897
Western Asia and Northern Africa	Rural	1997	0.299583	0.379738	0.471053
Australia and New Zealand	Rural	1998	0	0	0
Central Asia and Southern Asia	Rural	1998	0.87976	0.914613	0.939931
Eastern Asia and South-eastern Asia	Rural	1998	0.536273	0.759804	0.893123
Latin America & the Caribbean	Rural	1998	0.530871	0.601201	0.672693
Northern America and Europe	Rural	1998	0.0395832	0.065368	0.0941054
Oceania excluding Australia and New Zealand	Rural	1998	0.881024	0.95312	0.978033
Sub-Saharan Africa	Rural	1998	0.954463	0.97168	0.980837
Western Asia and Northern Africa	Rural	1998	0.28807	0.360496	0.44372
Australia and New Zealand	Rural	1999	0	0	0
Central Asia and Southern Asia	Rural	1999	0.872112	0.909265	0.935356
Eastern Asia and South-eastern Asia	Rural	1999	0.548832	0.761593	0.892736
Latin America & the Caribbean	Rural	1999	0.524467	0.592474	0.659212
Northern America and Europe	Rural	1999	0.0379977	0.0622947	0.0906064
Oceania excluding Australia and New Zealand	Rural	1999	0.886281	0.954723	0.978803
Sub-Saharan Africa	Rural	1999	0.954993	0.971515	0.980313
Western Asia and Northern Africa	Rural	1999	0.277611	0.340886	0.419317
Australia and New Zealand	Rural	2000	0	0	0
Central Asia and Southern Asia	Rural	2000	0.865868	0.904872	0.932847
Eastern Asia and South-eastern Asia	Rural	2000	0.553665	0.762111	0.888025
Latin America & the Caribbean	Rural	2000	0.516286	0.581262	0.647966
Northern America and Europe	Rural	2000	0.0371993	0.0588348	0.0863116
Oceania excluding Australia and New Zealand	Rural	2000	0.885918	0.95531	0.979038
Sub-Saharan Africa	Rural	2000	0.955889	0.971389	0.97996
Western Asia and Northern Africa	Rural	2000	0.26469	0.321334	0.394406
Australia and New Zealand	Rural	2001	0	0	0
Central Asia and Southern Asia	Rural	2001	0.859098	0.900369	0.929718
Eastern Asia and South-eastern Asia	Rural	2001	0.572187	0.763137	0.886236
Latin America & the Caribbean	Rural	2001	0.50487	0.570628	0.636261
Northern America and Europe	Rural	2001	0.0361915	0.0557204	0.0842231
Oceania excluding Australia and New Zealand	Rural	2001	0.891158	0.957004	0.978958
Sub-Saharan Africa	Rural	2001	0.957445	0.970532	0.979009
Western Asia and Northern Africa	Rural	2001	0.252254	0.304746	0.367803
Australia and New Zealand	Rural	2002	0	0	0
Central Asia and Southern Asia	Rural	2002	0.851735	0.895682	0.926874
Eastern Asia and South-eastern Asia	Rural	2002	0.560942	0.762862	0.880501
Latin America & the Caribbean	Rural	2002	0.495153	0.558856	0.626322
Northern America and Europe	Rural	2002	0.0350932	0.0525318	0.0821446
Oceania excluding Australia and New Zealand	Rural	2002	0.890073	0.957717	0.97956
Sub-Saharan Africa	Rural	2002	0.956918	0.970052	0.978336
Western Asia and Northern Africa	Rural	2002	0.240037	0.286479	0.348657
Australia and New Zealand	Rural	2003	0	0	0
Central Asia and Southern Asia	Rural	2003	0.846057	0.890607	0.923528
Eastern Asia and South-eastern Asia	Rural	2003	0.583952	0.764254	0.878026
Latin America & the Caribbean	Rural	2003	0.485772	0.548585	0.611982
Northern America and Europe	Rural	2003	0.0338064	0.0493873	0.0801016
Oceania excluding Australia and New Zealand	Rural	2003	0.894842	0.958548	0.978836
Sub-Saharan Africa	Rural	2003	0.956891	0.969186	0.977712
Western Asia and Northern Africa	Rural	2003	0.227116	0.27145	0.327751
Australia and New Zealand	Rural	2004	0	0	0
Central Asia and Southern Asia	Rural	2004	0.840405	0.885951	0.917586
Eastern Asia and South-eastern Asia	Rural	2004	0.584938	0.759325	0.872716
Latin America & the Caribbean	Rural	2004	0.478868	0.539584	0.603937
Northern America and Europe	Rural	2004	0.0323805	0.0469313	0.0814692
Oceania excluding Australia and New Zealand	Rural	2004	0.897046	0.959534	0.979931
Sub-Saharan Africa	Rural	2004	0.956281	0.968475	0.976702
Western Asia and Northern Africa	Rural	2004	0.217805	0.259043	0.311768
Australia and New Zealand	Rural	2005	0	0	0
Central Asia and Southern Asia	Rural	2005	0.831942	0.880974	0.9148
Eastern Asia and South-eastern Asia	Rural	2005	0.566858	0.755967	0.866876
Latin America & the Caribbean	Rural	2005	0.467782	0.529222	0.591837
Northern America and Europe	Rural	2005	0.0315855	0.0449528	0.0788097
Oceania excluding Australia and New Zealand	Rural	2005	0.896939	0.959865	0.980233
Sub-Saharan Africa	Rural	2005	0.955291	0.967472	0.9759
Western Asia and Northern Africa	Rural	2005	0.20792	0.24822	0.299081
Australia and New Zealand	Rural	2006	0	0	0
Central Asia and Southern Asia	Rural	2006	0.824047	0.875377	0.911064
Eastern Asia and South-eastern Asia	Rural	2006	0.577234	0.750424	0.864799
Latin America & the Caribbean	Rural	2006	0.45921	0.518871	0.579034
Northern America and Europe	Rural	2006	0.0306993	0.0435033	0.0804088
Oceania excluding Australia and New Zealand	Rural	2006	0.899021	0.960793	0.980457
Sub-Saharan Africa	Rural	2006	0.955006	0.966779	0.975286
Western Asia and Northern Africa	Rural	2006	0.202404	0.23826	0.286308
Australia and New Zealand	Rural	2007	0	0	0
Central Asia and Southern Asia	Rural	2007	0.818055	0.868586	0.905477
Eastern Asia and South-eastern Asia	Rural	2007	0.566139	0.744644	0.861653
Latin America & the Caribbean	Rural	2007	0.452785	0.51084	0.571276
Northern America and Europe	Rural	2007	0.0301669	0.0428059	0.0794581
Oceania excluding Australia and New Zealand	Rural	2007	0.902142	0.961213	0.980967
Sub-Saharan Africa	Rural	2007	0.954488	0.965888	0.974367
Western Asia and Northern Africa	Rural	2007	0.19301	0.229591	0.27324
Australia and New Zealand	Rural	2008	0	0	0
Central Asia and Southern Asia	Rural	2008	0.81096	0.86279	0.901793
Eastern Asia and South-eastern Asia	Rural	2008	0.558877	0.735063	0.854968
Latin America & the Caribbean	Rural	2008	0.446765	0.500637	0.557378
Northern America and Europe	Rural	2008	0.0294567	0.0427528	0.0896416
Oceania excluding Australia and New Zealand	Rural	2008	0.899899	0.962263	0.981642
Sub-Saharan Africa	Rural	2008	0.954626	0.96509	0.97344
Western Asia and Northern Africa	Rural	2008	0.187365	0.222148	0.264637
Australia and New Zealand	Rural	2009	0	0	0
Central Asia and Southern Asia	Rural	2009	0.799579	0.855517	0.897243
Eastern Asia and South-eastern Asia	Rural	2009	0.541397	0.725415	0.848032
Latin America & the Caribbean	Rural	2009	0.438716	0.492691	0.54839
Northern America and Europe	Rural	2009	0.0292375	0.0431095	0.0936781
Oceania excluding Australia and New Zealand	Rural	2009	0.896272	0.9629	0.981955
Sub-Saharan Africa	Rural	2009	0.953062	0.964323	0.972463
Western Asia and Northern Africa	Rural	2009	0.180157	0.214569	0.254968
Australia and New Zealand	Rural	2010	0	0	0
Central Asia and Southern Asia	Rural	2010	0.787891	0.845706	0.889229
Eastern Asia and South-eastern Asia	Rural	2010	0.535711	0.710481	0.838166
Latin America & the Caribbean	Rural	2010	0.431565	0.483605	0.541672
Northern America and Europe	Rural	2010	0.0290262	0.0441244	0.0960738
Oceania excluding Australia and New Zealand	Rural	2010	0.889387	0.963327	0.982452
Sub-Saharan Africa	Rural	2010	0.952353	0.963695	0.972319
Western Asia and Northern Africa	Rural	2010	0.175461	0.209094	0.247029
Australia and New Zealand	Rural	2011	0	0	0
Central Asia and Southern Asia	Rural	2011	0.775169	0.837098	0.881385
Eastern Asia and South-eastern Asia	Rural	2011	0.522337	0.696393	0.831314
Latin America & the Caribbean	Rural	2011	0.424933	0.474314	0.529713
Northern America and Europe	Rural	2011	0.0291397	0.0452289	0.100027
Oceania excluding Australia and New Zealand	Rural	2011	0.891239	0.963912	0.983227
Sub-Saharan Africa	Rural	2011	0.951676	0.962804	0.971156
Western Asia and Northern Africa	Rural	2011	0.168729	0.203582	0.241841
Australia and New Zealand	Rural	2012	0	0	0
Central Asia and Southern Asia	Rural	2012	0.762671	0.825257	0.874379
Eastern Asia and South-eastern Asia	Rural	2012	0.499042	0.682295	0.821772
Latin America & the Caribbean	Rural	2012	0.415297	0.465293	0.518304
Northern America and Europe	Rural	2012	0.0296102	0.046689	0.108847
Oceania excluding Australia and New Zealand	Rural	2012	0.890177	0.964864	0.984106
Sub-Saharan Africa	Rural	2012	0.9504	0.962251	0.971121
Western Asia and Northern Africa	Rural	2012	0.164779	0.198297	0.235504
Australia and New Zealand	Rural	2013	0	0	0
Central Asia and Southern Asia	Rural	2013	0.74867	0.812774	0.866854
Eastern Asia and South-eastern Asia	Rural	2013	0.488808	0.667386	0.810901
Latin America & the Caribbean	Rural	2013	0.406823	0.454729	0.51185
Northern America and Europe	Rural	2013	0.0297058	0.0487554	0.122497
Oceania excluding Australia and New Zealand	Rural	2013	0.883559	0.963989	0.984718
Sub-Saharan Africa	Rural	2013	0.949509	0.961838	0.970298
Western Asia and Northern Africa	Rural	2013	0.158824	0.193646	0.231169
Australia and New Zealand	Rural	2014	0	0	0
Central Asia and Southern Asia	Rural	2014	0.729735	0.797483	0.860676
Eastern Asia and South-eastern Asia	Rural	2014	0.448723	0.648365	0.805619
Latin America & the Caribbean	Rural	2014	0.396457	0.445102	0.50014
Northern America and Europe	Rural	2014	0.0297832	0.0507588	0.126352
Oceania excluding Australia and New Zealand	Rural	2014	0.870705	0.964508	0.984903
Sub-Saharan Africa	Rural	2014	0.949151	0.961113	0.969663
Western Asia and Northern Africa	Rural	2014	0.151416	0.189927	0.232013
Australia and New Zealand	Rural	2015	0	0	0
Central Asia and Southern Asia	Rural	2015	0.702902	0.781139	0.851701
Eastern Asia and South-eastern Asia	Rural	2015	0.42683	0.632923	0.793489
Latin America & the Caribbean	Rural	2015	0.384789	0.433759	0.493256
Northern America and Europe	Rural	2015	0.0299682	0.0534017	0.136856
Oceania excluding Australia and New Zealand	Rural	2015	0.853469	0.965946	0.985425
Sub-Saharan Africa	Rural	2015	0.947561	0.960337	0.969085
Western Asia and Northern Africa	Rural	2015	0.148306	0.186569	0.228271
Australia and New Zealand	Rural	2016	0	0	0
Central Asia and Southern Asia	Rural	2016	0.676418	0.762637	0.839391
Eastern Asia and South-eastern Asia	Rural	2016	0.388574	0.614158	0.788367
Latin America & the Caribbean	Rural	2016	0.373139	0.423046	0.48501
Northern America and Europe	Rural	2016	0.0298603	0.0555617	0.14529
Oceania excluding Australia and New Zealand	Rural	2016	0.848885	0.965443	0.98591
Sub-Saharan Africa	Rural	2016	0.945075	0.959706	0.968702
Western Asia and Northern Africa	Rural	2016	0.139962	0.183523	0.228806
Australia and New Zealand	Rural	2017	0	0	0
Central Asia and Southern Asia	Rural	2017	0.643858	0.745581	0.83137
Eastern Asia and South-eastern Asia	Rural	2017	0.360209	0.595991	0.779952
Latin America & the Caribbean	Rural	2017	0.362081	0.412257	0.474609
Northern America and Europe	Rural	2017	0.0304573	0.0582842	0.152478
Oceania excluding Australia and New Zealand	Rural	2017	0.831962	0.966213	0.98638
Sub-Saharan Africa	Rural	2017	0.944539	0.958557	0.968467
Western Asia and Northern Africa	Rural	2017	0.133877	0.181166	0.230406
Australia and New Zealand	Rural	2018	0	0	0
Central Asia and Southern Asia	Rural	2018	0.605507	0.722431	0.827039
Eastern Asia and South-eastern Asia	Rural	2018	0.325487	0.581732	0.778519
Latin America & the Caribbean	Rural	2018	0.349953	0.403235	0.469671
Northern America and Europe	Rural	2018	0.0314192	0.0604502	0.161039
Oceania excluding Australia and New Zealand	Rural	2018	0.806789	0.966157	0.987034
Sub-Saharan Africa	Rural	2018	0.940763	0.957607	0.967923
Western Asia and Northern Africa	Rural	2018	0.126027	0.177389	0.232573
Australia and New Zealand	Rural	2019	0	0	0
Central Asia and Southern Asia	Rural	2019	0.559502	0.702047	0.8211
Eastern Asia and South-eastern Asia	Rural	2019	0.297442	0.564295	0.766137
Latin America & the Caribbean	Rural	2019	0.340011	0.394624	0.46203
Northern America and Europe	Rural	2019	0.0307158	0.0631709	0.170207
Oceania excluding Australia and New Zealand	Rural	2019	0.794719	0.965907	0.987176
Sub-Saharan Africa	Rural	2019	0.940427	0.956741	0.967627
Western Asia and Northern Africa	Rural	2019	0.118005	0.176163	0.234542
Australia and New Zealand	Rural	2020	0	0	0
Central Asia and Southern Asia	Rural	2020	0.511268	0.676343	0.816512
Eastern Asia and South-eastern Asia	Rural	2020	0.270879	0.547097	0.758703
Latin America & the Caribbean	Rural	2020	0.32801	0.384531	0.458384
Northern America and Europe	Rural	2020	0.0312486	0.0661468	0.178426
Oceania excluding Australia and New Zealand	Rural	2020	0.768146	0.966333	0.987623
Sub-Saharan Africa	Rural	2020	0.936139	0.955247	0.967139
Western Asia and Northern Africa	Rural	2020	0.11139	0.174109	0.237258
Australia and New Zealand	Rural	2021	0	0	0
Central Asia and Southern Asia	Rural	2021	0.473335	0.653415	0.806637
Eastern Asia and South-eastern Asia	Rural	2021	0.250275	0.535334	0.751179
Latin America & the Caribbean	Rural	2021	0.313527	0.376916	0.457633
Northern America and Europe	Rural	2021	0.0314438	0.0681993	0.184577
Oceania excluding Australia and New Zealand	Rural	2021	0.742025	0.966257	0.988005
Sub-Saharan Africa	Rural	2021	0.932295	0.953894	0.966894
Western Asia and Northern Africa	Rural	2021	0.105528	0.172081	0.239385
Australia and New Zealand	Rural	2022	0	0	0
Central Asia and Southern Asia	Rural	2022	0.431817	0.63008	0.802371
Eastern Asia and South-eastern Asia	Rural	2022	0.223527	0.517165	0.749209
Latin America & the Caribbean	Rural	2022	0.302748	0.369121	0.454322
Northern America and Europe	Rural	2022	0.0311986	0.0707436	0.188627
Oceania excluding Australia and New Zealand	Rural	2022	0.711091	0.967102	0.988403
Sub-Saharan Africa	Rural	2022	0.929792	0.952498	0.966606
Western Asia and Northern Africa	Rural	2022	0.0994693	0.168973	0.244317
Australia and New Zealand	Rural	2023	0	0	0
Central Asia and Southern Asia	Rural	2023	0.385119	0.603411	0.80083
Eastern Asia and South-eastern Asia	Rural	2023	0.209804	0.50148	0.741204
Latin America & the Caribbean	Rural	2023	0.290268	0.361803	0.452921
Northern America and Europe	Rural	2023	0.0312418	0.0730202	0.193972
Oceania excluding Australia and New Zealand	Rural	2023	0.686153	0.967323	0.98875
Sub-Saharan Africa	Rural	2023	0.924748	0.95062	0.966242
Western Asia and Northern Africa	Rural	2023	0.0934068	0.168059	0.247707
Australia and New Zealand	Rural	2024	0	0	0
Central Asia and Southern Asia	Rural	2024	0.351211	0.577771	0.796063
Eastern Asia and South-eastern Asia	Rural	2024	0.191175	0.487117	0.733743
Latin America & the Caribbean	Rural	2024	0.28006	0.3545	0.455912
Northern America and Europe	Rural	2024	0.0327431	0.0760112	0.196496
Oceania excluding Australia and New Zealand	Rural	2024	0.640898	0.967209	0.98919
Sub-Saharan Africa	Rural	2024	0.920633	0.949175	0.965757
Western Asia and Northern Africa	Rural	2024	0.0905636	0.166256	0.250827
Australia and New Zealand	Rural	2025	0	0	0
Central Asia and Southern Asia	Rural	2025	0.312687	0.551209	0.788967
Eastern Asia and South-eastern Asia	Rural	2025	0.181527	0.475679	0.726929
Latin America & the Caribbean	Rural	2025	0.27292	0.348794	0.449576
Northern America and Europe	Rural	2025	0.0322048	0.0803602	0.200137
Oceania excluding Australia and New Zealand	Rural	2025	0.617047	0.967469	0.989397
Sub-Saharan Africa	Rural	2025	0.915366	0.948077	0.965767
Western Asia and Northern Africa	Rural	2025	0.0860015	0.166424	0.255446
Australia and New Zealand	Rural	2026	0	0	0
Central Asia and Southern Asia	Rural	2026	0.287155	0.522979	0.782726
Eastern Asia and South-eastern Asia	Rural	2026	0.16961	0.46037	0.724546
Latin America & the Caribbean	Rural	2026	0.260603	0.343458	0.454774
Northern America and Europe	Rural	2026	0.0324343	0.0834452	0.205407
Oceania excluding Australia and New Zealand	Rural	2026	0.603293	0.967621	0.989594
Sub-Saharan Africa	Rural	2026	0.908343	0.94621	0.964937
Western Asia and Northern Africa	Rural	2026	0.080548	0.164612	0.259555
Australia and New Zealand	Rural	2027	0	0	0
Central Asia and Southern Asia	Rural	2027	0.25567	0.498793	0.780323
Eastern Asia and South-eastern Asia	Rural	2027	0.158801	0.451385	0.719813
Latin America & the Caribbean	Rural	2027	0.25518	0.339295	0.451424
Northern America and Europe	Rural	2027	0.0332072	0.0860937	0.205138
Oceania excluding Australia and New Zealand	Rural	2027	0.557734	0.966959	0.990247
Sub-Saharan Africa	Rural	2027	0.90284	0.944482	0.9654
Western Asia and Northern Africa	Rural	2027	0.0768408	0.165677	0.262678
Australia and New Zealand	Rural	2028	0	0	0
Central Asia and Southern Asia	Rural	2028	0.233697	0.472243	0.776089
Eastern Asia and South-eastern Asia	Rural	2028	0.149542	0.437849	0.716426
Latin America & the Caribbean	Rural	2028	0.244454	0.333591	0.456035
Northern America and Europe	Rural	2028	0.0333728	0.0866273	0.209087
Oceania excluding Australia and New Zealand	Rural	2028	0.528248	0.966841	0.990298
Sub-Saharan Africa	Rural	2028	0.897021	0.943383	0.965002
Western Asia and Northern Africa	Rural	2028	0.0756832	0.163806	0.267972
Australia and New Zealand	Rural	2029	0	0	0
Central Asia and Southern Asia	Rural	2029	0.208171	0.447548	0.76654
Eastern Asia and South-eastern Asia	Rural	2029	0.146714	0.427478	0.7104
Latin America & the Caribbean	Rural	2029	0.238479	0.330962	0.458793
Northern America and Europe	Rural	2029	0.0338066	0.0893759	0.209956
Oceania excluding Australia and New Zealand	Rural	2029	0.481088	0.966136	0.990327
Sub-Saharan Africa	Rural	2029	0.891138	0.940732	0.964551
Western Asia and Northern Africa	Rural	2029	0.0733254	0.16414	0.270344
Australia and New Zealand	Rural	2030	0	0	0
Central Asia and Southern Asia	Rural	2030	0.190748	0.42086	0.758515
Eastern Asia and South-eastern Asia	Rural	2030	0.138703	0.413178	0.709517
Latin America & the Caribbean	Rural	2030	0.232288	0.327257	0.464075
Northern America and Europe	Rural	2030	0.0345458	0.094107	0.213048
Oceania excluding Australia and New Zealand	Rural	2030	0.461731	0.966848	0.990561
Sub-Saharan Africa	Rural	2030	0.879861	0.939295	0.964761
Western Asia and Northern Africa	Rural	2030	0.0704238	0.165433	0.277452
Australia and New Zealand	Overall	1990	0	0	0
Central Asia and Southern Asia	Overall	1990	0.742938	0.826335	0.884541
Eastern Asia and South-eastern Asia	Overall	1990	0.362047	0.597955	0.784026
Latin America & the Caribbean	Overall	1990	0.251744	0.302731	0.360954
Northern America and Europe	Overall	1990	0.0188448	0.0330632	0.0559194
Oceania excluding Australia and New Zealand	Overall	1990	0.778276	0.88189	0.932339
Sub-Saharan Africa	Overall	1990	0.866358	0.90288	0.924078
Western Asia and Northern Africa	Overall	1990	0.212155	0.290397	0.388958
Australia and New Zealand	Overall	1991	0	0	0
Central Asia and Southern Asia	Overall	1991	0.73276	0.818739	0.877772
Eastern Asia and South-eastern Asia	Overall	1991	0.378054	0.5967	0.78027
Latin America & the Caribbean	Overall	1991	0.243492	0.290422	0.347305
Northern America and Europe	Overall	1991	0.0183105	0.0316327	0.051391
Oceania excluding Australia and New Zealand	Overall	1991	0.782367	0.88264	0.930598
Sub-Saharan Africa	Overall	1991	0.871353	0.904118	0.924133
Western Asia and Northern Africa	Overall	1991	0.209151	0.280981	0.372598
Australia and New Zealand	Overall	1992	0	0	0
Central Asia and Southern Asia	Overall	1992	0.729542	0.812182	0.875192
Eastern Asia and South-eastern Asia	Overall	1992	0.394438	0.598577	0.760654
Latin America & the Caribbean	Overall	1992	0.233713	0.279334	0.334322
Northern America and Europe	Overall	1992	0.0180989	0.0305445	0.0497464
Oceania excluding Australia and New Zealand	Overall	1992	0.78967	0.881351	0.928904
Sub-Saharan Africa	Overall	1992	0.87597	0.9048	0.923173
Western Asia and Northern Africa	Overall	1992	0.202869	0.272234	0.356294
Australia and New Zealand	Overall	1993	0	0	0
Central Asia and Southern Asia	Overall	1993	0.717942	0.804831	0.867302
Eastern Asia and South-eastern Asia	Overall	1993	0.40799	0.595762	0.751804
Latin America & the Caribbean	Overall	1993	0.225066	0.267468	0.318349
Northern America and Europe	Overall	1993	0.0174878	0.0294003	0.0487232
Oceania excluding Australia and New Zealand	Overall	1993	0.792487	0.882163	0.927785
Sub-Saharan Africa	Overall	1993	0.879435	0.905553	0.922661
Western Asia and Northern Africa	Overall	1993	0.199429	0.261873	0.340172
Australia and New Zealand	Overall	1994	0	0	0
Central Asia and Southern Asia	Overall	1994	0.70766	0.796451	0.862455
Eastern Asia and South-eastern Asia	Overall	1994	0.42478	0.595197	0.744112
Latin America & the Caribbean	Overall	1994	0.217658	0.257659	0.307284
Northern America and Europe	Overall	1994	0.0166567	0.0282097	0.0451538
Oceania excluding Australia and New Zealand	Overall	1994	0.797217	0.882687	0.927452
Sub-Saharan Africa	Overall	1994	0.88283	0.90573	0.921471
Western Asia and Northern Africa	Overall	1994	0.194743	0.253164	0.329429
Australia and New Zealand	Overall	1995	0	0	0
Central Asia and Southern Asia	Overall	1995	0.694459	0.789167	0.854653
Eastern Asia and South-eastern Asia	Overall	1995	0.441675	0.593711	0.740111
Latin America & the Caribbean	Overall	1995	0.208527	0.247853	0.297553
Northern America and Europe	Overall	1995	0.0167118	0.0271426	0.0434442
Oceania excluding Australia and New Zealand	Overall	1995	0.804119	0.884149	0.926072
Sub-Saharan Africa	Overall	1995	0.88351	0.905687	0.920719
Western Asia and Northern Africa	Overall	1995	0.187652	0.241897	0.310699
Australia and New Zealand	Overall	1996	0	0	0
Central Asia and Southern Asia	Overall	1996	0.684646	0.779152	0.851036
Eastern Asia and South-eastern Asia	Overall	1996	0.447781	0.590386	0.736552
Latin America & the Caribbean	Overall	1996	0.20056	0.237494	0.286179
Northern America and Europe	Overall	1996	0.0156122	0.0257537	0.0418871
Oceania excluding Australia and New Zealand	Overall	1996	0.805767	0.883726	0.924975
Sub-Saharan Africa	Overall	1996	0.885035	0.906059	0.920017
Western Asia and Northern Africa	Overall	1996	0.181339	0.232241	0.296177
Australia and New Zealand	Overall	1997	0	0	0
Central Asia and Southern Asia	Overall	1997	0.671412	0.770331	0.843439
Eastern Asia and South-eastern Asia	Overall	1997	0.45578	0.587954	0.726072
Latin America & the Caribbean	Overall	1997	0.193013	0.227463	0.273512
Northern America and Europe	Overall	1997	0.0151002	0.0246815	0.0381237
Oceania excluding Australia and New Zealand	Overall	1997	0.808708	0.884826	0.925354
Sub-Saharan Africa	Overall	1997	0.886186	0.905301	0.918827
Western Asia and Northern Africa	Overall	1997	0.175388	0.220685	0.275688
Australia and New Zealand	Overall	1998	0	0	0
Central Asia and Southern Asia	Overall	1998	0.660959	0.757771	0.83688
Eastern Asia and South-eastern Asia	Overall	1998	0.461584	0.586203	0.716511
Latin America & the Caribbean	Overall	1998	0.18326	0.219129	0.264404
Northern America and Europe	Overall	1998	0.0148339	0.0233951	0.0373075
Oceania excluding Australia and New Zealand	Overall	1998	0.811217	0.885056	0.925336
Sub-Saharan Africa	Overall	1998	0.887917	0.904907	0.918022
Western Asia and Northern Africa	Overall	1998	0.166914	0.208406	0.259085
Australia and New Zealand	Overall	1999	0	0	0
Central Asia and Southern Asia	Overall	1999	0.647692	0.748522	0.830665
Eastern Asia and South-eastern Asia	Overall	1999	0.461767	0.582632	0.706222
Latin America & the Caribbean	Overall	1999	0.177414	0.210022	0.253763
Northern America and Europe	Overall	1999	0.0143198	0.0221234	0.0356949
Oceania excluding Australia and New Zealand	Overall	1999	0.80989	0.886404	0.927477
Sub-Saharan Africa	Overall	1999	0.8877	0.903836	0.917132
Western Asia and Northern Africa	Overall	1999	0.159709	0.195364	0.239954
Australia and New Zealand	Overall	2000	0	0	0
Central Asia and Southern Asia	Overall	2000	0.626822	0.737433	0.823083
Eastern Asia and South-eastern Asia	Overall	2000	0.462498	0.576955	0.699052
Latin America & the Caribbean	Overall	2000	0.168503	0.201439	0.244042
Northern America and Europe	Overall	2000	0.0135632	0.0210484	0.0339977
Oceania excluding Australia and New Zealand	Overall	2000	0.80739	0.88599	0.927608
Sub-Saharan Africa	Overall	2000	0.888074	0.902659	0.914699
Western Asia and Northern Africa	Overall	2000	0.150669	0.183306	0.227281
Australia and New Zealand	Overall	2001	0	0	0
Central Asia and Southern Asia	Overall	2001	0.620365	0.725523	0.815278
Eastern Asia and South-eastern Asia	Overall	2001	0.452216	0.56971	0.689771
Latin America & the Caribbean	Overall	2001	0.161206	0.193911	0.23729
Northern America and Europe	Overall	2001	0.0128701	0.0195926	0.0341133
Oceania excluding Australia and New Zealand	Overall	2001	0.810658	0.886638	0.927289
Sub-Saharan Africa	Overall	2001	0.887321	0.901375	0.912753
Western Asia and Northern Africa	Overall	2001	0.141034	0.171727	0.209722
Australia and New Zealand	Overall	2002	0	0	0
Central Asia and Southern Asia	Overall	2002	0.602263	0.714598	0.80842
Eastern Asia and South-eastern Asia	Overall	2002	0.454903	0.56295	0.677329
Latin America & the Caribbean	Overall	2002	0.157086	0.187041	0.22881
Northern America and Europe	Overall	2002	0.0122671	0.018391	0.0332426
Oceania excluding Australia and New Zealand	Overall	2002	0.809802	0.886597	0.929868
Sub-Saharan Africa	Overall	2002	0.886074	0.89977	0.910915
Western Asia and Northern Africa	Overall	2002	0.133459	0.161368	0.19777
Australia and New Zealand	Overall	2003	0	0	0
Central Asia and Southern Asia	Overall	2003	0.589187	0.701365	0.804918
Eastern Asia and South-eastern Asia	Overall	2003	0.447136	0.554567	0.680039
Latin America & the Caribbean	Overall	2003	0.151008	0.180876	0.221861
Northern America and Europe	Overall	2003	0.0115874	0.017454	0.0325484
Oceania excluding Australia and New Zealand	Overall	2003	0.807352	0.887196	0.930198
Sub-Saharan Africa	Overall	2003	0.885071	0.897672	0.908753
Western Asia and Northern Africa	Overall	2003	0.126074	0.152238	0.184656
Australia and New Zealand	Overall	2004	0	0	0
Central Asia and Southern Asia	Overall	2004	0.573199	0.693951	0.794912
Eastern Asia and South-eastern Asia	Overall	2004	0.440401	0.544346	0.665433
Latin America & the Caribbean	Overall	2004	0.14605	0.17416	0.214311
Northern America and Europe	Overall	2004	0.0113759	0.0166235	0.0333819
Oceania excluding Australia and New Zealand	Overall	2004	0.808993	0.887663	0.929863
Sub-Saharan Africa	Overall	2004	0.882847	0.895706	0.906432
Western Asia and Northern Africa	Overall	2004	0.119485	0.143167	0.173975
Australia and New Zealand	Overall	2005	0	0	0
Central Asia and Southern Asia	Overall	2005	0.560624	0.683912	0.788121
Eastern Asia and South-eastern Asia	Overall	2005	0.425297	0.534137	0.653582
Latin America & the Caribbean	Overall	2005	0.141031	0.16895	0.207102
Northern America and Europe	Overall	2005	0.0106934	0.0159016	0.0331608
Oceania excluding Australia and New Zealand	Overall	2005	0.806643	0.887644	0.932758
Sub-Saharan Africa	Overall	2005	0.880827	0.893777	0.904717
Western Asia and Northern Africa	Overall	2005	0.112421	0.135905	0.164369
Australia and New Zealand	Overall	2006	0	0	0
Central Asia and Southern Asia	Overall	2006	0.544707	0.671088	0.78133
Eastern Asia and South-eastern Asia	Overall	2006	0.411541	0.520408	0.634128
Latin America & the Caribbean	Overall	2006	0.136692	0.162882	0.202251
Northern America and Europe	Overall	2006	0.0104101	0.0155582	0.0342474
Oceania excluding Australia and New Zealand	Overall	2006	0.813283	0.887071	0.931932
Sub-Saharan Africa	Overall	2006	0.879082	0.89128	0.902405
Western Asia and Northern Africa	Overall	2006	0.106161	0.1283	0.154799
Australia and New Zealand	Overall	2007	0	0	0
Central Asia and Southern Asia	Overall	2007	0.532161	0.662373	0.773291
Eastern Asia and South-eastern Asia	Overall	2007	0.397998	0.507069	0.623521
Latin America & the Caribbean	Overall	2007	0.133009	0.158587	0.197798
Northern America and Europe	Overall	2007	0.0102959	0.0153233	0.036708
Oceania excluding Australia and New Zealand	Overall	2007	0.807865	0.887421	0.931347
Sub-Saharan Africa	Overall	2007	0.876632	0.889341	0.899652
Western Asia and Northern Africa	Overall	2007	0.100466	0.122023	0.148705
Australia and New Zealand	Overall	2008	0	0	0
Central Asia and Southern Asia	Overall	2008	0.524275	0.654527	0.76503
Eastern Asia and South-eastern Asia	Overall	2008	0.376182	0.489454	0.607404
Latin America & the Caribbean	Overall	2008	0.12854	0.154427	0.190649
Northern America and Europe	Overall	2008	0.0098474	0.0152627	0.0390649
Oceania excluding Australia and New Zealand	Overall	2008	0.811136	0.887136	0.931849
Sub-Saharan Africa	Overall	2008	0.875288	0.887204	0.897719
Western Asia and Northern Africa	Overall	2008	0.0953401	0.116027	0.141472
Australia and New Zealand	Overall	2009	0	0	0
Central Asia and Southern Asia	Overall	2009	0.509095	0.640676	0.756445
Eastern Asia and South-eastern Asia	Overall	2009	0.364263	0.475198	0.592347
Latin America & the Caribbean	Overall	2009	0.125523	0.150341	0.186069
Northern America and Europe	Overall	2009	0.00977327	0.0157183	0.0418041
Oceania excluding Australia and New Zealand	Overall	2009	0.805793	0.889672	0.932383
Sub-Saharan Africa	Overall	2009	0.872386	0.885133	0.895581
Western Asia and Northern Africa	Overall	2009	0.0904907	0.110896	0.13531
Australia and New Zealand	Overall	2010	0	0	0
Central Asia and Southern Asia	Overall	2010	0.500545	0.630078	0.746853
Eastern Asia and South-eastern Asia	Overall	2010	0.345444	0.457813	0.574433
Latin America & the Caribbean	Overall	2010	0.121895	0.146888	0.17979
Northern America and Europe	Overall	2010	0.00984054	0.0164353	0.0444524
Oceania excluding Australia and New Zealand	Overall	2010	0.808355	0.887514	0.934533
Sub-Saharan Africa	Overall	2010	0.870212	0.882656	0.893899
Western Asia and Northern Africa	Overall	2010	0.0867594	0.106469	0.129615
Australia and New Zealand	Overall	2011	0	0	0
Central Asia and Southern Asia	Overall	2011	0.482955	0.621715	0.739396
Eastern Asia and South-eastern Asia	Overall	2011	0.330075	0.440921	0.559841
Latin America & the Caribbean	Overall	2011	0.11955	0.143162	0.177135
Northern America and Europe	Overall	2011	0.0100093	0.0169323	0.0478342
Oceania excluding Australia and New Zealand	Overall	2011	0.805975	0.888482	0.935785
Sub-Saharan Africa	Overall	2011	0.867107	0.880441	0.891584
Western Asia and Northern Africa	Overall	2011	0.0835033	0.102809	0.125975
Australia and New Zealand	Overall	2012	0	0	0
Central Asia and Southern Asia	Overall	2012	0.468234	0.60719	0.729165
Eastern Asia and South-eastern Asia	Overall	2012	0.313616	0.424205	0.548344
Latin America & the Caribbean	Overall	2012	0.116577	0.139219	0.173705
Northern America and Europe	Overall	2012	0.00996265	0.0180343	0.0513789
Oceania excluding Australia and New Zealand	Overall	2012	0.803509	0.88841	0.934383
Sub-Saharan Africa	Overall	2012	0.864672	0.877747	0.889333
Western Asia and Northern Africa	Overall	2012	0.0801082	0.099466	0.123779
Australia and New Zealand	Overall	2013	0	0	0
Central Asia and Southern Asia	Overall	2013	0.456327	0.591509	0.721741
Eastern Asia and South-eastern Asia	Overall	2013	0.292547	0.406205	0.539515
Latin America & the Caribbean	Overall	2013	0.112859	0.1361	0.169193
Northern America and Europe	Overall	2013	0.0102278	0.0191976	0.0577937
Oceania excluding Australia and New Zealand	Overall	2013	0.796868	0.888831	0.937906
Sub-Saharan Africa	Overall	2013	0.861645	0.875001	0.886485
Western Asia and Northern Africa	Overall	2013	0.0761296	0.0962498	0.120029
Australia and New Zealand	Overall	2014	0	0	0
Central Asia and Southern Asia	Overall	2014	0.44216	0.577982	0.706841
Eastern Asia and South-eastern Asia	Overall	2014	0.277106	0.391282	0.520007
Latin America & the Caribbean	Overall	2014	0.110625	0.132401	0.164852
Northern America and Europe	Overall	2014	0.0105598	0.0206893	0.0626181
Oceania excluding Australia and New Zealand	Overall	2014	0.790523	0.889065	0.937609
Sub-Saharan Africa	Overall	2014	0.857191	0.871567	0.883516
Western Asia and Northern Africa	Overall	2014	0.0732566	0.0934963	0.11774
Australia and New Zealand	Overall	2015	0	0	0
Central Asia and Southern Asia	Overall	2015	0.425471	0.56472	0.696478
Eastern Asia and South-eastern Asia	Overall	2015	0.25897	0.377327	0.513672
Latin America & the Caribbean	Overall	2015	0.107012	0.129519	0.164073
Northern America and Europe	Overall	2015	0.0106378	0.0220727	0.0681338
Oceania excluding Australia and New Zealand	Overall	2015	0.783062	0.889374	0.939758
Sub-Saharan Africa	Overall	2015	0.852857	0.867495	0.880024
Western Asia and Northern Africa	Overall	2015	0.0697892	0.0913844	0.11543
Australia and New Zealand	Overall	2016	0	0	0
Central Asia and Southern Asia	Overall	2016	0.398917	0.545616	0.686163
Eastern Asia and South-eastern Asia	Overall	2016	0.240809	0.360379	0.500448
Latin America & the Caribbean	Overall	2016	0.10446	0.126918	0.158162
Northern America and Europe	Overall	2016	0.0109848	0.0235857	0.0757118
Oceania excluding Australia and New Zealand	Overall	2016	0.773124	0.888993	0.942141
Sub-Saharan Africa	Overall	2016	0.846717	0.863126	0.876585
Western Asia and Northern Africa	Overall	2016	0.067519	0.0893553	0.114195
Australia and New Zealand	Overall	2017	0	0	0
Central Asia and Southern Asia	Overall	2017	0.380368	0.528594	0.672444
Eastern Asia and South-eastern Asia	Overall	2017	0.217404	0.347569	0.498133
Latin America & the Caribbean	Overall	2017	0.101643	0.124206	0.156982
Northern America and Europe	Overall	2017	0.0109909	0.025771	0.0822194
Oceania excluding Australia and New Zealand	Overall	2017	0.765093	0.889341	0.943384
Sub-Saharan Africa	Overall	2017	0.840259	0.857765	0.872927
Western Asia and Northern Africa	Overall	2017	0.0639177	0.0873221	0.114704
Australia and New Zealand	Overall	2018	0	0	0
Central Asia and Southern Asia	Overall	2018	0.359094	0.512344	0.657267
Eastern Asia and South-eastern Asia	Overall	2018	0.200348	0.332843	0.49438
Latin America & the Caribbean	Overall	2018	0.0994118	0.121946	0.15565
Northern America and Europe	Overall	2018	0.0115595	0.0274367	0.0886412
Oceania excluding Australia and New Zealand	Overall	2018	0.755025	0.888678	0.945229
Sub-Saharan Africa	Overall	2018	0.833459	0.852087	0.868701
Western Asia and Northern Africa	Overall	2018	0.0616322	0.0860265	0.114711
Australia and New Zealand	Overall	2019	0	0	0
Central Asia and Southern Asia	Overall	2019	0.339652	0.495073	0.648866
Eastern Asia and South-eastern Asia	Overall	2019	0.186945	0.31892	0.48704
Latin America & the Caribbean	Overall	2019	0.0966743	0.120343	0.153921
Northern America and Europe	Overall	2019	0.0115176	0.0298471	0.0933164
Oceania excluding Australia and New Zealand	Overall	2019	0.736735	0.888297	0.945923
Sub-Saharan Africa	Overall	2019	0.825921	0.846583	0.864549
Western Asia and Northern Africa	Overall	2019	0.0570381	0.0848923	0.114188
Australia and New Zealand	Overall	2020	0	0	0
Central Asia and Southern Asia	Overall	2020	0.319663	0.476623	0.638436
Eastern Asia and South-eastern Asia	Overall	2020	0.167436	0.311491	0.490477
Latin America & the Caribbean	Overall	2020	0.0946949	0.119053	0.154333
Northern America and Europe	Overall	2020	0.0118419	0.0315629	0.100988
Oceania excluding Australia and New Zealand	Overall	2020	0.717813	0.889096	0.948181
Sub-Saharan Africa	Overall	2020	0.817621	0.841398	0.860685
Western Asia and Northern Africa	Overall	2020	0.0555581	0.0839711	0.115935
Australia and New Zealand	Overall	2021	0	0	0
Central Asia and Southern Asia	Overall	2021	0.293432	0.456079	0.630601
Eastern Asia and South-eastern Asia	Overall	2021	0.151395	0.295068	0.490226
Latin America & the Caribbean	Overall	2021	0.0924857	0.118332	0.156801
Northern America and Europe	Overall	2021	0.0123383	0.0343389	0.105605
Oceania excluding Australia and New Zealand	Overall	2021	0.70097	0.888676	0.950097
Sub-Saharan Africa	Overall	2021	0.812203	0.836596	0.858208
Western Asia and Northern Africa	Overall	2021	0.0538141	0.083444	0.117339
Australia and New Zealand	Overall	2022	0	0	0
Central Asia and Southern Asia	Overall	2022	0.275595	0.435759	0.613962
Eastern Asia and South-eastern Asia	Overall	2022	0.14086	0.288802	0.49867
Latin America & the Caribbean	Overall	2022	0.0904435	0.117558	0.158038
Northern America and Europe	Overall	2022	0.0124427	0.0369824	0.112295
Oceania excluding Australia and New Zealand	Overall	2022	0.671662	0.887893	0.951125
Sub-Saharan Africa	Overall	2022	0.8046	0.831873	0.855617
Western Asia and Northern Africa	Overall	2022	0.051099	0.0826857	0.11842
Australia and New Zealand	Overall	2023	0	0	0
Central Asia and Southern Asia	Overall	2023	0.243324	0.41792	0.610732
Eastern Asia and South-eastern Asia	Overall	2023	0.131501	0.276957	0.501119
Latin America & the Caribbean	Overall	2023	0.089421	0.117164	0.163588
Northern America and Europe	Overall	2023	0.0132261	0.0402809	0.11832
Oceania excluding Australia and New Zealand	Overall	2023	0.652246	0.890401	0.952821
Sub-Saharan Africa	Overall	2023	0.798829	0.828576	0.853999
Western Asia and Northern Africa	Overall	2023	0.0494313	0.0831307	0.121224
Australia and New Zealand	Overall	2024	0	0	0
Central Asia and Southern Asia	Overall	2024	0.230037	0.397725	0.60376
Eastern Asia and South-eastern Asia	Overall	2024	0.121406	0.271399	0.50595
Latin America & the Caribbean	Overall	2024	0.0882294	0.117656	0.166436
Northern America and Europe	Overall	2024	0.0127369	0.0427704	0.12252
Oceania excluding Australia and New Zealand	Overall	2024	0.642736	0.888096	0.954116
Sub-Saharan Africa	Overall	2024	0.792211	0.82539	0.852867
Western Asia and Northern Africa	Overall	2024	0.0487022	0.0828748	0.123831
Australia and New Zealand	Overall	2025	0	0	0
Central Asia and Southern Asia	Overall	2025	0.211111	0.381048	0.595929
Eastern Asia and South-eastern Asia	Overall	2025	0.112169	0.264028	0.512064
Latin America & the Caribbean	Overall	2025	0.0867404	0.11847	0.170622
Northern America and Europe	Overall	2025	0.0138702	0.0460552	0.126047
Oceania excluding Australia and New Zealand	Overall	2025	0.610084	0.887784	0.956708
Sub-Saharan Africa	Overall	2025	0.786084	0.822365	0.851664
Western Asia and Northern Africa	Overall	2025	0.0476007	0.0830575	0.128696
Australia and New Zealand	Overall	2026	0	0	0
Central Asia and Southern Asia	Overall	2026	0.189907	0.360733	0.575439
Eastern Asia and South-eastern Asia	Overall	2026	0.105597	0.255114	0.52194
Latin America & the Caribbean	Overall	2026	0.0856872	0.118679	0.178024
Northern America and Europe	Overall	2026	0.0136974	0.0488562	0.131097
Oceania excluding Australia and New Zealand	Overall	2026	0.579	0.886953	0.958362
Sub-Saharan Africa	Overall	2026	0.782271	0.819811	0.850904
Western Asia and Northern Africa	Overall	2026	0.0467855	0.0833161	0.132262
Australia and New Zealand	Overall	2027	0	0	0
Central Asia and Southern Asia	Overall	2027	0.175215	0.346293	0.574334
Eastern Asia and South-eastern Asia	Overall	2027	0.0974791	0.247112	0.521033
Latin America & the Caribbean	Overall	2027	0.0852596	0.120674	0.187776
Northern America and Europe	Overall	2027	0.0138655	0.0522454	0.133574
Oceania excluding Australia and New Zealand	Overall	2027	0.555865	0.88576	0.958389
Sub-Saharan Africa	Overall	2027	0.776907	0.817659	0.848559
Western Asia and Northern Africa	Overall	2027	0.0458034	0.0852967	0.137434
Australia and New Zealand	Overall	2028	0	0	0
Central Asia and Southern Asia	Overall	2028	0.162495	0.332473	0.565957
Eastern Asia and South-eastern Asia	Overall	2028	0.0921389	0.243448	0.530598
Latin America & the Caribbean	Overall	2028	0.0848998	0.12222	0.196251
Northern America and Europe	Overall	2028	0.0146104	0.0549215	0.137203
Oceania excluding Australia and New Zealand	Overall	2028	0.531762	0.887345	0.960319
Sub-Saharan Africa	Overall	2028	0.771212	0.814804	0.848578
Western Asia and Northern Africa	Overall	2028	0.0452921	0.0860188	0.141585
Australia and New Zealand	Overall	2029	0	0	0
Central Asia and Southern Asia	Overall	2029	0.146323	0.314163	0.562276
Eastern Asia and South-eastern Asia	Overall	2029	0.0872518	0.239915	0.543521
Latin America & the Caribbean	Overall	2029	0.0832649	0.124325	0.203846
Northern America and Europe	Overall	2029	0.0150576	0.0591993	0.136902
Oceania excluding Australia and New Zealand	Overall	2029	0.518698	0.887363	0.961212
Sub-Saharan Africa	Overall	2029	0.766957	0.812767	0.849948
Western Asia and Northern Africa	Overall	2029	0.0454947	0.087601	0.148338
Australia and New Zealand	Overall	2030	0	0	0
Central Asia and Southern Asia	Overall	2030	0.136744	0.297352	0.550078
Eastern Asia and South-eastern Asia	Overall	2030	0.0831776	0.232587	0.550742
Latin America & the Caribbean	Overall	2030	0.083218	0.127672	0.208892
Northern America and Europe	Overall	2030	0.0150901	0.062599	0.139511
Oceania excluding Australia and New Zealand	Overall	2030	0.497731	0.886084	0.962762
Sub-Saharan Africa	Overall	2030	0.761712	0.810912	0.847739
Western Asia and Northern Africa	Overall	2030	0.0445186	0.0897783	0.15375
World	Urban	1990	0.210587	0.257877	0.325097
World	Urban	1991	0.210672	0.256653	0.322242
World	Urban	1992	0.211598	0.2551	0.315764
World	Urban	1993	0.210761	0.253966	0.311853
World	Urban	1994	0.21042	0.252637	0.307301
World	Urban	1995	0.209726	0.250661	0.301086
World	Urban	1996	0.210242	0.248982	0.296312
World	Urban	1997	0.208232	0.246589	0.291673
World	Urban	1998	0.206993	0.244374	0.284792
World	Urban	1999	0.205279	0.240933	0.279146
World	Urban	2000	0.201884	0.238222	0.275426
World	Urban	2001	0.201078	0.235007	0.270754
World	Urban	2002	0.198075	0.231869	0.26644
World	Urban	2003	0.19418	0.227964	0.26438
World	Urban	2004	0.189793	0.224328	0.260432
World	Urban	2005	0.187598	0.220117	0.257873
World	Urban	2006	0.181781	0.215139	0.252392
World	Urban	2007	0.176748	0.20946	0.24948
World	Urban	2008	0.172155	0.204878	0.244255
World	Urban	2009	0.166784	0.199735	0.238654
World	Urban	2010	0.16237	0.194237	0.236354
World	Urban	2011	0.158662	0.189973	0.232715
World	Urban	2012	0.154218	0.18605	0.232515
World	Urban	2013	0.149636	0.182387	0.227313
World	Urban	2014	0.146276	0.178684	0.226113
World	Urban	2015	0.143081	0.176096	0.22756
World	Urban	2016	0.139094	0.17345	0.232204
World	Urban	2017	0.134161	0.170291	0.234006
World	Urban	2018	0.130626	0.168057	0.236423
World	Urban	2019	0.127858	0.166816	0.242624
World	Urban	2020	0.124879	0.165215	0.245979
World	Urban	2021	0.123952	0.164252	0.254458
World	Urban	2022	0.123673	0.164844	0.263557
World	Urban	2023	0.122497	0.16495	0.271703
World	Urban	2024	0.123239	0.165319	0.274939
World	Urban	2025	0.122755	0.16673	0.283714
World	Urban	2026	0.123894	0.169264	0.291332
World	Urban	2027	0.125465	0.169741	0.300142
World	Urban	2028	0.127492	0.17215	0.306988
World	Urban	2029	0.127698	0.174966	0.316136
World	Urban	2030	0.130164	0.177586	0.322353
World	Rural	1990	0.5974	0.746017	0.826646
World	Rural	1991	0.611656	0.748406	0.825147
World	Rural	1992	0.622393	0.748705	0.823312
World	Rural	1993	0.630163	0.748737	0.82076
World	Rural	1994	0.642218	0.75152	0.819408
World	Rural	1995	0.652881	0.751837	0.814707
World	Rural	1996	0.656954	0.752214	0.810374
World	Rural	1997	0.661027	0.751149	0.807035
World	Rural	1998	0.66792	0.751896	0.803481
World	Rural	1999	0.671518	0.750956	0.800646
World	Rural	2000	0.673605	0.74965	0.796482
World	Rural	2001	0.678158	0.748073	0.793956
World	Rural	2002	0.672016	0.745843	0.789937
World	Rural	2003	0.679018	0.744416	0.786335
World	Rural	2004	0.679994	0.741032	0.782573
World	Rural	2005	0.672092	0.737596	0.778479
World	Rural	2006	0.673411	0.733916	0.775579
World	Rural	2007	0.671553	0.729939	0.770779
World	Rural	2008	0.667195	0.72469	0.76611
World	Rural	2009	0.659699	0.718882	0.762193
World	Rural	2010	0.654725	0.712037	0.755007
World	Rural	2011	0.648021	0.704959	0.750799
World	Rural	2012	0.639853	0.697019	0.744067
World	Rural	2013	0.630288	0.689266	0.737514
World	Rural	2014	0.615862	0.678394	0.731362
World	Rural	2015	0.603547	0.668968	0.722893
World	Rural	2016	0.586104	0.657571	0.714809
World	Rural	2017	0.571957	0.646638	0.708353
World	Rural	2018	0.554726	0.633938	0.704072
World	Rural	2019	0.532133	0.622932	0.698115
World	Rural	2020	0.516206	0.61132	0.69328
World	Rural	2021	0.496204	0.599706	0.687362
World	Rural	2022	0.480157	0.585666	0.683365
World	Rural	2023	0.462193	0.573467	0.676021
World	Rural	2024	0.445663	0.562675	0.671591
World	Rural	2025	0.432698	0.550988	0.667102
World	Rural	2026	0.41583	0.539741	0.666654
World	Rural	2027	0.40399	0.528467	0.660994
World	Rural	2028	0.39187	0.518137	0.658582
World	Rural	2029	0.383147	0.509099	0.652306
World	Rural	2030	0.37438	0.498896	0.650671
World	Overall	1990	0.447569	0.530816	0.597236
World	Overall	1991	0.450852	0.528138	0.594577
World	Overall	1992	0.45693	0.527424	0.586496
World	Overall	1993	0.457393	0.524657	0.582766
World	Overall	1994	0.460742	0.522778	0.57702
World	Overall	1995	0.464707	0.520513	0.574386
World	Overall	1996	0.463746	0.517093	0.569836
World	Overall	1997	0.462778	0.513577	0.564377
World	Overall	1998	0.461842	0.509495	0.557008
World	Overall	1999	0.459209	0.505752	0.554471
World	Overall	2000	0.453612	0.501455	0.548666
World	Overall	2001	0.449262	0.496094	0.540545
World	Overall	2002	0.445218	0.490386	0.535423
World	Overall	2003	0.440024	0.485201	0.532032
World	Overall	2004	0.434222	0.479463	0.526129
World	Overall	2005	0.426618	0.473329	0.52077
World	Overall	2006	0.419025	0.466574	0.511396
World	Overall	2007	0.412167	0.459207	0.505819
World	Overall	2008	0.403044	0.451482	0.4981
World	Overall	2009	0.397072	0.4444	0.491779
World	Overall	2010	0.388426	0.436896	0.484679
World	Overall	2011	0.381699	0.430376	0.479674
World	Overall	2012	0.373482	0.42175	0.473146
World	Overall	2013	0.365183	0.413099	0.464639
World	Overall	2014	0.354227	0.405393	0.458579
World	Overall	2015	0.347406	0.398836	0.452525
World	Overall	2016	0.337872	0.389759	0.447385
World	Overall	2017	0.328038	0.382448	0.439888
World	Overall	2018	0.317108	0.373373	0.436773
World	Overall	2019	0.30845	0.366142	0.43023
World	Overall	2020	0.299919	0.360697	0.428183
World	Overall	2021	0.288322	0.352565	0.424281
World	Overall	2022	0.283222	0.345652	0.423505
World	Overall	2023	0.272888	0.339735	0.419508
World	Overall	2024	0.268513	0.335053	0.418834
World	Overall	2025	0.264285	0.329822	0.41962
World	Overall	2026	0.255518	0.325211	0.41447
World	Overall	2027	0.250663	0.321587	0.415983
World	Overall	2028	0.244302	0.318771	0.416391
World	Overall	2029	0.243178	0.315505	0.418135
World	Overall	2030	0.239673	0.313039	0.413977

## Sheet: Polluting (Population)
region	area	year	population_lower95	population_median	population_upper95
Australia and New Zealand	Urban	1990	0	0	0
Central Asia and Southern Asia	Urban	1990	165452	195383	224087
Eastern Asia and South-eastern Asia	Urban	1990	118460	210302	357936
Latin America & the Caribbean	Urban	1990	26012.5	37532.7	54895
Northern America and Europe	Urban	1990	3314.86	9182.46	26515
Oceania excluding Australia and New Zealand	Urban	1990	408.288	777.74	997.637
Sub-Saharan Africa	Urban	1990	90227.4	101120	108108
Western Asia and Northern Africa	Urban	1990	10060.7	19072.5	37816.5
Australia and New Zealand	Urban	1991	0	0	0
Central Asia and Southern Asia	Urban	1991	167222	197350	226090
Eastern Asia and South-eastern Asia	Urban	1991	124566	219050	366417
Latin America & the Caribbean	Urban	1991	25625.9	36079.7	52159
Northern America and Europe	Urban	1991	3285.9	8869.84	24297.8
Oceania excluding Australia and New Zealand	Urban	1991	425.912	784.518	1001.14
Sub-Saharan Africa	Urban	1991	95261.6	105668	112678
Western Asia and Northern Africa	Urban	1991	10163.6	18657.3	37042.5
Australia and New Zealand	Urban	1992	0	0	0
Central Asia and Southern Asia	Urban	1992	167685	197935	226394
Eastern Asia and South-eastern Asia	Urban	1992	133172	228361	368363
Latin America & the Caribbean	Urban	1992	24958.9	34893.5	49782.1
Northern America and Europe	Urban	1992	3300.81	8415.28	22417.1
Oceania excluding Australia and New Zealand	Urban	1992	445.399	795.35	1011.16
Sub-Saharan Africa	Urban	1992	100606	110472	117229
Western Asia and Northern Africa	Urban	1992	10550.5	18302.8	35193.3
Australia and New Zealand	Urban	1993	0	0	0
Central Asia and Southern Asia	Urban	1993	168840	198286	227127
Eastern Asia and South-eastern Asia	Urban	1993	141624	235669	371593
Latin America & the Caribbean	Urban	1993	24749.9	33597	48652.8
Northern America and Europe	Urban	1993	3318.57	8033	20980.4
Oceania excluding Australia and New Zealand	Urban	1993	459.72	797.583	1018.14
Sub-Saharan Africa	Urban	1993	106129	115307	121700
Western Asia and Northern Africa	Urban	1993	10741.8	17820.9	32714.9
Australia and New Zealand	Urban	1994	0	0	0
Central Asia and Southern Asia	Urban	1994	168426	198626	228088
Eastern Asia and South-eastern Asia	Urban	1994	147405	243730	371935
Latin America & the Caribbean	Urban	1994	24125.8	32662.3	46523.3
Northern America and Europe	Urban	1994	3022.5	7574.86	19366.3
Oceania excluding Australia and New Zealand	Urban	1994	480.008	807.648	1031.06
Sub-Saharan Africa	Urban	1994	111899	120258	126482
Western Asia and Northern Africa	Urban	1994	10514.1	17233.4	31267.8
Australia and New Zealand	Urban	1995	0	0	0
Central Asia and Southern Asia	Urban	1995	167839	198272	229251
Eastern Asia and South-eastern Asia	Urban	1995	155158	249929	369956
Latin America & the Caribbean	Urban	1995	23438.8	31790.3	46656.5
Northern America and Europe	Urban	1995	3090.23	7218.26	17599.8
Oceania excluding Australia and New Zealand	Urban	1995	490.033	813.987	1039.99
Sub-Saharan Africa	Urban	1995	117037	125296	131523
Western Asia and Northern Africa	Urban	1995	10539.3	16811.1	29666.6
Australia and New Zealand	Urban	1996	0	0	0
Central Asia and Southern Asia	Urban	1996	166174	198020	228635
Eastern Asia and South-eastern Asia	Urban	1996	164846	258285	374703
Latin America & the Caribbean	Urban	1996	22893.6	30576.6	43471.9
Northern America and Europe	Urban	1996	2954.06	6880.02	16842.9
Oceania excluding Australia and New Zealand	Urban	1996	509.405	820.253	1045.69
Sub-Saharan Africa	Urban	1996	122534	130253	136205
Western Asia and Northern Africa	Urban	1996	10546.7	16132.6	28189
Australia and New Zealand	Urban	1997	0	0	0
Central Asia and Southern Asia	Urban	1997	164448	197058	228096
Eastern Asia and South-eastern Asia	Urban	1997	167181	264065	375292
Latin America & the Caribbean	Urban	1997	22305.5	29627.2	43093.1
Northern America and Europe	Urban	1997	2891.86	6467.82	14979
Oceania excluding Australia and New Zealand	Urban	1997	518.956	825.819	1053.07
Sub-Saharan Africa	Urban	1997	128249	135649	141515
Western Asia and Northern Africa	Urban	1997	10282.3	15517.2	26476.8
Australia and New Zealand	Urban	1998	0	0	0
Central Asia and Southern Asia	Urban	1998	162952	194776	228962
Eastern Asia and South-eastern Asia	Urban	1998	178674	269988	374887
Latin America & the Caribbean	Urban	1998	21619.8	28978.8	42321
Northern America and Europe	Urban	1998	2785.61	6104.62	13859
Oceania excluding Australia and New Zealand	Urban	1998	532.562	834.415	1057.25
Sub-Saharan Africa	Urban	1998	134006	140883	146743
Western Asia and Northern Africa	Urban	1998	9951.11	14831.9	24366.7
Australia and New Zealand	Urban	1999	0	0	0
Central Asia and Southern Asia	Urban	1999	159353	192510	226122
Eastern Asia and South-eastern Asia	Urban	1999	181140	275738	375327
Latin America & the Caribbean	Urban	1999	20937.5	27711.6	41171.5
Northern America and Europe	Urban	1999	2816.74	5742.42	13451.4
Oceania excluding Australia and New Zealand	Urban	1999	545.16	843.917	1068.36
Sub-Saharan Africa	Urban	1999	139795	146326	152171
Western Asia and Northern Africa	Urban	1999	9727.21	14190.6	23328.3
Australia and New Zealand	Urban	2000	0	0	0
Central Asia and Southern Asia	Urban	2000	156273	189546	224062
Eastern Asia and South-eastern Asia	Urban	2000	187148	280944	378513
Latin America & the Caribbean	Urban	2000	20420.7	26979.8	40782
Northern America and Europe	Urban	2000	2745.73	5455.39	12868.3
Oceania excluding Australia and New Zealand	Urban	2000	563.712	844.112	1072.58
Sub-Saharan Africa	Urban	2000	145631	151924	157703
Western Asia and Northern Africa	Urban	2000	9464.99	13594.2	21263.6
Australia and New Zealand	Urban	2001	0	0	0
Central Asia and Southern Asia	Urban	2001	153357	187134	223728
Eastern Asia and South-eastern Asia	Urban	2001	196856	283582	384730
Latin America & the Caribbean	Urban	2001	19859	26241.4	39724.5
Northern America and Europe	Urban	2001	2652.43	5191.69	12199.5
Oceania excluding Australia and New Zealand	Urban	2001	566.927	857.115	1084.96
Sub-Saharan Africa	Urban	2001	151852	158017	163890
Western Asia and Northern Africa	Urban	2001	9209.3	12894.7	19832.1
Australia and New Zealand	Urban	2002	0	0	0
Central Asia and Southern Asia	Urban	2002	149528	184957	221589
Eastern Asia and South-eastern Asia	Urban	2002	197770	287054	386116
Latin America & the Caribbean	Urban	2002	19153.9	25557.8	39157.2
Northern America and Europe	Urban	2002	2649.97	5016.52	12899.4
Oceania excluding Australia and New Zealand	Urban	2002	591.368	869.111	1098.34
Sub-Saharan Africa	Urban	2002	158296	164381	170193
Western Asia and Northern Africa	Urban	2002	8803.39	12395.7	18525.8
Australia and New Zealand	Urban	2003	0	0	0
Central Asia and Southern Asia	Urban	2003	145180	182289	219521
Eastern Asia and South-eastern Asia	Urban	2003	193976	290435	394456
Latin America & the Caribbean	Urban	2003	18868.8	25324.5	38579.4
Northern America and Europe	Urban	2003	2539.71	4860.38	13909
Oceania excluding Australia and New Zealand	Urban	2003	612.253	879.44	1108.19
Sub-Saharan Africa	Urban	2003	165103	170950	177070
Western Asia and Northern Africa	Urban	2003	8416.13	11848.9	17714.5
Australia and New Zealand	Urban	2004	0	0	0
Central Asia and Southern Asia	Urban	2004	142274	179763	219806
Eastern Asia and South-eastern Asia	Urban	2004	191838	290588	396629
Latin America & the Caribbean	Urban	2004	18441.1	24692.3	37665
Northern America and Europe	Urban	2004	2537.39	4722.85	14279.7
Oceania excluding Australia and New Zealand	Urban	2004	638.818	893.505	1115.44
Sub-Saharan Africa	Urban	2004	171724	177704	183589
Western Asia and Northern Africa	Urban	2004	8167.3	11326.1	16705.8
Australia and New Zealand	Urban	2005	0	0	0
Central Asia and Southern Asia	Urban	2005	138352	177928	220950
Eastern Asia and South-eastern Asia	Urban	2005	194597	289511	399921
Latin America & the Caribbean	Urban	2005	18268.4	24535.7	37822.5
Northern America and Europe	Urban	2005	2512.4	4620.49	14857.2
Oceania excluding Australia and New Zealand	Urban	2005	656.973	903.64	1126.46
Sub-Saharan Africa	Urban	2005	178887	184787	190973
Western Asia and Northern Africa	Urban	2005	7638.77	10777.4	15555.4
Australia and New Zealand	Urban	2006	0	0	0
Central Asia and Southern Asia	Urban	2006	134908	175484	216159
Eastern Asia and South-eastern Asia	Urban	2006	186330	286737	399180
Latin America & the Caribbean	Urban	2006	18146.7	24265.6	38125.6
Northern America and Europe	Urban	2006	2453.47	4734.11	16840.3
Oceania excluding Australia and New Zealand	Urban	2006	667.427	919.941	1130.76
Sub-Saharan Africa	Urban	2006	186389	192145	198316
Western Asia and Northern Africa	Urban	2006	7343.23	10271.9	14841.2
Australia and New Zealand	Urban	2007	0	0	0
Central Asia and Southern Asia	Urban	2007	130166	171306	215667
Eastern Asia and South-eastern Asia	Urban	2007	180356	279457	398916
Latin America & the Caribbean	Urban	2007	18143.7	24184.3	37592.9
Northern America and Europe	Urban	2007	2453.63	4766.49	18257.5
Oceania excluding Australia and New Zealand	Urban	2007	698.273	937.481	1142.24
Sub-Saharan Africa	Urban	2007	193531	199432	205421
Western Asia and Northern Africa	Urban	2007	6867.89	9762.61	14327
Australia and New Zealand	Urban	2008	0	0	0
Central Asia and Southern Asia	Urban	2008	126873	168189	214761
Eastern Asia and South-eastern Asia	Urban	2008	171761	273031	398103
Latin America & the Caribbean	Urban	2008	18040.6	24057.9	37304.5
Northern America and Europe	Urban	2008	2423.4	4998.99	19990.5
Oceania excluding Australia and New Zealand	Urban	2008	712.575	960.564	1170.79
Sub-Saharan Africa	Urban	2008	201799	207649	213868
Western Asia and Northern Africa	Urban	2008	6473.7	9320.06	13917.8
Australia and New Zealand	Urban	2009	0	0	0
Central Asia and Southern Asia	Urban	2009	122727	165428	215237
Eastern Asia and South-eastern Asia	Urban	2009	165480	264651	393724
Latin America & the Caribbean	Urban	2009	18167.2	24317.1	37018.6
Northern America and Europe	Urban	2009	2447.6	5339.6	22618.6
Oceania excluding Australia and New Zealand	Urban	2009	728.76	976.254	1190.69
Sub-Saharan Africa	Urban	2009	209993	216192	222735
Western Asia and Northern Africa	Urban	2009	6165.02	8965.71	13363.6
Australia and New Zealand	Urban	2010	0	0	0
Central Asia and Southern Asia	Urban	2010	119726	162322	211615
Eastern Asia and South-eastern Asia	Urban	2010	152465	256616	387664
Latin America & the Caribbean	Urban	2010	18375.1	24443.5	36939.2
Northern America and Europe	Urban	2010	2448.71	5641.19	26071
Oceania excluding Australia and New Zealand	Urban	2010	720.429	997.547	1218.04
Sub-Saharan Africa	Urban	2010	218313	224802	231308
Western Asia and Northern Africa	Urban	2010	5818.03	8638.36	13169.5
Australia and New Zealand	Urban	2011	0	0	0
Central Asia and Southern Asia	Urban	2011	112879	159005	211195
Eastern Asia and South-eastern Asia	Urban	2011	147214	248046	392963
Latin America & the Caribbean	Urban	2011	18423.2	24700.5	37704.4
Northern America and Europe	Urban	2011	2504.75	6168.45	28477.8
Oceania excluding Australia and New Zealand	Urban	2011	743.089	1021.86	1259.06
Sub-Saharan Africa	Urban	2011	227263	233863	240685
Western Asia and Northern Africa	Urban	2011	5527.94	8443.96	13031.7
Australia and New Zealand	Urban	2012	0	0	0
Central Asia and Southern Asia	Urban	2012	109063	155516	210814
Eastern Asia and South-eastern Asia	Urban	2012	132287	241706	401430
Latin America & the Caribbean	Urban	2012	18697.6	25147.9	37426.2
Northern America and Europe	Urban	2012	2418.07	6791.61	33868.5
Oceania excluding Australia and New Zealand	Urban	2012	749.949	1042.49	1301.38
Sub-Saharan Africa	Urban	2012	235766	242733	249833
Western Asia and Northern Africa	Urban	2012	5278.66	8232.32	12988.2
Australia and New Zealand	Urban	2013	0	0	0
Central Asia and Southern Asia	Urban	2013	105284	151667	208990
Eastern Asia and South-eastern Asia	Urban	2013	122736	234610	397370
Latin America & the Caribbean	Urban	2013	18856.1	25493.3	37940.8
Northern America and Europe	Urban	2013	2577.29	7393.37	37700
Oceania excluding Australia and New Zealand	Urban	2013	741.684	1076.43	1340.98
Sub-Saharan Africa	Urban	2013	244268	251618	258951
Western Asia and Northern Africa	Urban	2013	5169.57	8223.01	13064.6
Australia and New Zealand	Urban	2014	0	0	0
Central Asia and Southern Asia	Urban	2014	101421	146900	204983
Eastern Asia and South-eastern Asia	Urban	2014	114859	228969	410435
Latin America & the Caribbean	Urban	2014	19313.2	25935.4	38963.1
Northern America and Europe	Urban	2014	2563.2	8319.09	42728.7
Oceania excluding Australia and New Zealand	Urban	2014	741.38	1101.27	1389.85
Sub-Saharan Africa	Urban	2014	251621	260115	268093
Western Asia and Northern Africa	Urban	2014	4982.33	8066.51	13064.6
Australia and New Zealand	Urban	2015	0	0	0
Central Asia and Southern Asia	Urban	2015	96167.3	143207	204448
Eastern Asia and South-eastern Asia	Urban	2015	109564	224922	424833
Latin America & the Caribbean	Urban	2015	19241.1	26453.6	40070.5
Northern America and Europe	Urban	2015	2691.77	9134.86	49319
Oceania excluding Australia and New Zealand	Urban	2015	738.795	1130.08	1445.02
Sub-Saharan Africa	Urban	2015	259522	268425	276861
Western Asia and Northern Africa	Urban	2015	4778.52	8217.31	13405.9
Australia and New Zealand	Urban	2016	0	0	0
Central Asia and Southern Asia	Urban	2016	87780.9	138748	213147
Eastern Asia and South-eastern Asia	Urban	2016	100116	223339	443306
Latin America & the Caribbean	Urban	2016	19968.9	27118.7	41247.5
Northern America and Europe	Urban	2016	2657.22	10305.2	52672.1
Oceania excluding Australia and New Zealand	Urban	2016	731.525	1163.43	1497.72
Sub-Saharan Africa	Urban	2016	266266	276020	285680
Western Asia and Northern Africa	Urban	2016	4616.28	8194.29	13938.4
Australia and New Zealand	Urban	2017	0	0	0
Central Asia and Southern Asia	Urban	2017	82830.6	134911	211130
Eastern Asia and South-eastern Asia	Urban	2017	90704.8	216956	470743
Latin America & the Caribbean	Urban	2017	19861.2	27679.4	41371.8
Northern America and Europe	Urban	2017	2802.52	11219.2	62182.3
Oceania excluding Australia and New Zealand	Urban	2017	715.553	1200.31	1563.46
Sub-Saharan Africa	Urban	2017	272373	284031	294964
Western Asia and Northern Africa	Urban	2017	4404.69	8368.32	14212.9
Australia and New Zealand	Urban	2018	0	0	0
Central Asia and Southern Asia	Urban	2018	77016.6	131129	216525
Eastern Asia and South-eastern Asia	Urban	2018	84819.9	213000	489880
Latin America & the Caribbean	Urban	2018	20279.5	28278.1	43510.7
Northern America and Europe	Urban	2018	2801.06	12484.7	71439.8
Oceania excluding Australia and New Zealand	Urban	2018	712.179	1227.79	1620.3
Sub-Saharan Africa	Urban	2018	278236	291108	303637
Western Asia and Northern Africa	Urban	2018	4289.09	8607.9	15138
Australia and New Zealand	Urban	2019	0	0	0
Central Asia and Southern Asia	Urban	2019	71757.8	127337	220557
Eastern Asia and South-eastern Asia	Urban	2019	77653.6	211893	521226
Latin America & the Caribbean	Urban	2019	20116.1	29286.6	46512.6
Northern America and Europe	Urban	2019	2845.69	13706.5	78205.4
Oceania excluding Australia and New Zealand	Urban	2019	711.112	1276.53	1689.45
Sub-Saharan Africa	Urban	2019	283151	298770	313148
Western Asia and Northern Africa	Urban	2019	4149.2	8892.05	15862.1
Australia and New Zealand	Urban	2020	0	0	0
Central Asia and Southern Asia	Urban	2020	66126.3	124523	229231
Eastern Asia and South-eastern Asia	Urban	2020	70582.9	207981	558209
Latin America & the Caribbean	Urban	2020	20827.9	30358.6	48500
Northern America and Europe	Urban	2020	3064.52	15478.5	83079
Oceania excluding Australia and New Zealand	Urban	2020	715.91	1316.41	1751.36
Sub-Saharan Africa	Urban	2020	288175	306764	323995
Western Asia and Northern Africa	Urban	2020	4173	9297.99	16877.1
Australia and New Zealand	Urban	2021	0	0	0
Central Asia and Southern Asia	Urban	2021	61823.5	120847	236367
Eastern Asia and South-eastern Asia	Urban	2021	66665.4	205321	601793
Latin America & the Caribbean	Urban	2021	21009	31766.4	51700.8
Northern America and Europe	Urban	2021	3028.51	16624	90013.4
Oceania excluding Australia and New Zealand	Urban	2021	693.285	1359.24	1825.41
Sub-Saharan Africa	Urban	2021	295274	316152	335321
Western Asia and Northern Africa	Urban	2021	3985.45	9652.82	18716
Australia and New Zealand	Urban	2022	0	0	0
Central Asia and Southern Asia	Urban	2022	58069.8	118439	241390
Eastern Asia and South-eastern Asia	Urban	2022	63558.6	202830	641304
Latin America & the Caribbean	Urban	2022	20776.2	33015.5	55297.1
Northern America and Europe	Urban	2022	3276.84	18976.9	95197.8
Oceania excluding Australia and New Zealand	Urban	2022	695.681	1407.83	1887.16
Sub-Saharan Africa	Urban	2022	301661	326057	347343
Western Asia and Northern Africa	Urban	2022	3984.27	10306.5	20035
Australia and New Zealand	Urban	2023	0	0	0
Central Asia and Southern Asia	Urban	2023	54141.4	116130	250932
Eastern Asia and South-eastern Asia	Urban	2023	60152.3	200090	683239
Latin America & the Caribbean	Urban	2023	21770.4	34934	59087.7
Northern America and Europe	Urban	2023	3299.1	21587.4	102428
Oceania excluding Australia and New Zealand	Urban	2023	697.566	1459.55	1963.69
Sub-Saharan Africa	Urban	2023	310587	337220	361742
Western Asia and Northern Africa	Urban	2023	4086.52	10804	22340.4
Australia and New Zealand	Urban	2024	0	0	0
Central Asia and Southern Asia	Urban	2024	50780.9	113584	261489
Eastern Asia and South-eastern Asia	Urban	2024	57527.6	197996	702812
Latin America & the Caribbean	Urban	2024	21746.5	36451.8	64744.4
Northern America and Europe	Urban	2024	3507.31	23845.4	105158
Oceania excluding Australia and New Zealand	Urban	2024	694.819	1513.67	2029.08
Sub-Saharan Africa	Urban	2024	318029	349133	375850
Western Asia and Northern Africa	Urban	2024	4172.19	11511.6	24737.5
Australia and New Zealand	Urban	2025	0	0	0
Central Asia and Southern Asia	Urban	2025	48910.3	110750	274385
Eastern Asia and South-eastern Asia	Urban	2025	54813.6	196749	754710
Latin America & the Caribbean	Urban	2025	22552.3	38509.9	70932.9
Northern America and Europe	Urban	2025	3745.29	26739.5	107961
Oceania excluding Australia and New Zealand	Urban	2025	704.192	1575.15	2116.55
Sub-Saharan Africa	Urban	2025	327852	362256	392820
Western Asia and Northern Africa	Urban	2025	4403.26	12347.3	26678.8
Australia and New Zealand	Urban	2026	0	0	0
Central Asia and Southern Asia	Urban	2026	45819.7	110287	285534
Eastern Asia and South-eastern Asia	Urban	2026	54194.7	200344	785140
Latin America & the Caribbean	Urban	2026	22569.9	40684	76582.5
Northern America and Europe	Urban	2026	3792.59	28997.7	111011
Oceania excluding Australia and New Zealand	Urban	2026	701.486	1628.59	2186.82
Sub-Saharan Africa	Urban	2026	339038	376308	409998
Western Asia and Northern Africa	Urban	2026	4435.03	13271.4	29853.7
Australia and New Zealand	Urban	2027	0	0	0
Central Asia and Southern Asia	Urban	2027	43389.6	110884	300592
Eastern Asia and South-eastern Asia	Urban	2027	51804.9	195131	820326
Latin America & the Caribbean	Urban	2027	23278.3	42719.5	85324.5
Northern America and Europe	Urban	2027	3966.89	31647.9	112505
Oceania excluding Australia and New Zealand	Urban	2027	702.4	1698.83	2273.69
Sub-Saharan Africa	Urban	2027	350280	391664	427531
Western Asia and Northern Africa	Urban	2027	4506.94	14285	34100.2
Australia and New Zealand	Urban	2028	0	0	0
Central Asia and Southern Asia	Urban	2028	41453.3	108667	312740
Eastern Asia and South-eastern Asia	Urban	2028	50070.3	196157	860406
Latin America & the Caribbean	Urban	2028	24315.6	45254.6	91366.5
Northern America and Europe	Urban	2028	4087.03	35824.1	114234
Oceania excluding Australia and New Zealand	Urban	2028	716.101	1755.23	2341.9
Sub-Saharan Africa	Urban	2028	362123	407020	446026
Western Asia and Northern Africa	Urban	2028	4702.98	15275	36887.1
Australia and New Zealand	Urban	2029	0	0	0
Central Asia and Southern Asia	Urban	2029	39494	110067	319665
Eastern Asia and South-eastern Asia	Urban	2029	47062.7	197521	893290
Latin America & the Caribbean	Urban	2029	25051.3	48431.1	99197.4
Northern America and Europe	Urban	2029	4180.62	38220.8	115406
Oceania excluding Australia and New Zealand	Urban	2029	711.728	1827.05	2436.48
Sub-Saharan Africa	Urban	2029	373915	423171	464521
Western Asia and Northern Africa	Urban	2029	4907.27	16843.9	40707.3
Australia and New Zealand	Urban	2030	0	0	0
Central Asia and Southern Asia	Urban	2030	38195.1	108519	341102
Eastern Asia and South-eastern Asia	Urban	2030	45821.5	195992	928738
Latin America & the Caribbean	Urban	2030	25689.2	50721.6	108261
Northern America and Europe	Urban	2030	4605.23	42198.9	116832
Oceania excluding Australia and New Zealand	Urban	2030	708.821	1887.66	2519.25
Sub-Saharan Africa	Urban	2030	386501	440628	483671
Western Asia and Northern Africa	Urban	2030	5307.94	18418.2	45676.8
Australia and New Zealand	Rural	1990	0	0	0
Central Asia and Southern Asia	Rural	1990	814004	842887	865842
Eastern Asia and South-eastern Asia	Rural	1990	446929	892683	1.13679e+06
Latin America & the Caribbean	Rural	1990	75310.2	87190.9	97344.9
Northern America and Europe	Rural	1990	12374	22727	34639.2
Oceania excluding Australia and New Zealand	Rural	1990	3961.57	4561.95	4733.02
Sub-Saharan Africa	Rural	1990	329608	344450	350375
Western Asia and Northern Africa	Rural	1990	43593.1	62220.7	80425.5
Australia and New Zealand	Rural	1991	0	0	0
Central Asia and Southern Asia	Rural	1991	828866	857169	879349
Eastern Asia and South-eastern Asia	Rural	1991	480248	905099	1.13815e+06
Latin America & the Caribbean	Rural	1991	74843.8	85993.3	96229.7
Northern America and Europe	Rural	1991	12113	22120.8	33327.1
Oceania excluding Australia and New Zealand	Rural	1991	4140.98	4675.23	4843.41
Sub-Saharan Africa	Rural	1991	339094	352698	358137
Western Asia and Northern Africa	Rural	1991	44159.6	61905.6	79901.9
Australia and New Zealand	Rural	1992	0	0	0
Central Asia and Southern Asia	Rural	1992	841107	870746	892689
Eastern Asia and South-eastern Asia	Rural	1992	517316	904584	1.13448e+06
Latin America & the Caribbean	Rural	1992	74477.6	84826.1	94231.4
Northern America and Europe	Rural	1992	12004	21640.9	32610.7
Oceania excluding Australia and New Zealand	Rural	1992	4282.68	4789.81	4958.89
Sub-Saharan Africa	Rural	1992	347917	360826	365953
Western Asia and Northern Africa	Rural	1992	44649.6	61538	78792.4
Australia and New Zealand	Rural	1993	0	0	0
Central Asia and Southern Asia	Rural	1993	856310	883970	905881
Eastern Asia and South-eastern Asia	Rural	1993	541995	905796	1.1285e+06
Latin America & the Caribbean	Rural	1993	73638.7	83233.6	92876.2
Northern America and Europe	Rural	1993	11988	21193.8	31590.5
Oceania excluding Australia and New Zealand	Rural	1993	4425.55	4910.37	5075.61
Sub-Saharan Africa	Rural	1993	357494	369089	373683
Western Asia and Northern Africa	Rural	1993	44261.9	60849.5	77263.7
Australia and New Zealand	Rural	1994	0	0	0
Central Asia and Southern Asia	Rural	1994	867737	896671	918941
Eastern Asia and South-eastern Asia	Rural	1994	573677	914226	1.1262e+06
Latin America & the Caribbean	Rural	1994	72368.2	81957.2	91663.8
Northern America and Europe	Rural	1994	11561.9	20773.8	30211.8
Oceania excluding Australia and New Zealand	Rural	1994	4582.88	5038.95	5198.99
Sub-Saharan Africa	Rural	1994	367244	377334	382015
Western Asia and Northern Africa	Rural	1994	45027.9	60297.3	76616.9
Australia and New Zealand	Rural	1995	0	0	0
Central Asia and Southern Asia	Rural	1995	878722	909361	931589
Eastern Asia and South-eastern Asia	Rural	1995	600995	918380	1.11433e+06
Latin America & the Caribbean	Rural	1995	71294.8	80502	89787.7
Northern America and Europe	Rural	1995	11577.7	20080.8	28987.8
Oceania excluding Australia and New Zealand	Rural	1995	4718.87	5166.41	5323.28
Sub-Saharan Africa	Rural	1995	375949	385817	390129
Western Asia and Northern Africa	Rural	1995	45031.1	59126.5	74431.7
Australia and New Zealand	Rural	1996	0	0	0
Central Asia and Southern Asia	Rural	1996	889001	921290	943795
Eastern Asia and South-eastern Asia	Rural	1996	613651	918165	1.10318e+06
Latin America & the Caribbean	Rural	1996	69922.7	78950.7	88299
Northern America and Europe	Rural	1996	11132.7	19517.1	27794.3
Oceania excluding Australia and New Zealand	Rural	1996	4855.02	5297.27	5451.85
Sub-Saharan Africa	Rural	1996	385030	394448	398732
Western Asia and Northern Africa	Rural	1996	45016.2	57812.4	72495.2
Australia and New Zealand	Rural	1997	0	0	0
Central Asia and Southern Asia	Rural	1997	896419	931398	955733
Eastern Asia and South-eastern Asia	Rural	1997	628451	915565	1.09497e+06
Latin America & the Caribbean	Rural	1997	68664.2	77510.3	86420.8
Northern America and Europe	Rural	1997	10939.8	18780.8	27008.6
Oceania excluding Australia and New Zealand	Rural	1997	5013.83	5431.59	5582.97
Sub-Saharan Africa	Rural	1997	394977	403050	406989
Western Asia and Northern Africa	Rural	1997	44301.5	56154.7	69658.1
Australia and New Zealand	Rural	1998	0	0	0
Central Asia and Southern Asia	Rural	1998	906389	942297	968381
Eastern Asia and South-eastern Asia	Rural	1998	648343	918587	1.07977e+06
Latin America & the Caribbean	Rural	1998	67128.1	76021.3	85061.4
Northern America and Europe	Rural	1998	10904.6	18007.9	25924.6
Oceania excluding Australia and New Zealand	Rural	1998	5150.94	5572.45	5718.1
Sub-Saharan Africa	Rural	1998	404554	411852	415733
Western Asia and Northern Africa	Rural	1998	43148	53996	66461.6
Australia and New Zealand	Rural	1999	0	0	0
Central Asia and Southern Asia	Rural	1999	912086	950942	978229
Eastern Asia and South-eastern Asia	Rural	1999	660196	916128	1.07388e+06
Latin America & the Caribbean	Rural	1999	66118	74691.4	83104.9
Northern America and Europe	Rural	1999	10421.7	17085.7	24850.8
Oceania excluding Australia and New Zealand	Rural	1999	5306.34	5716.11	5860.29
Sub-Saharan Africa	Rural	1999	413476	420629	424439
Western Asia and Northern Africa	Rural	1999	42091.3	51685.1	63576.7
Australia and New Zealand	Rural	2000	0	0	0
Central Asia and Southern Asia	Rural	2000	918883	960275	989963
Eastern Asia and South-eastern Asia	Rural	2000	662139	911423	1.06201e+06
Latin America & the Caribbean	Rural	2000	64842.8	73003.5	81381.2
Northern America and Europe	Rural	2000	10161.1	16071	23576.4
Oceania excluding Australia and New Zealand	Rural	2000	5430.2	5855.53	6000.97
Sub-Saharan Africa	Rural	2000	422713	429568	433358
Western Asia and Northern Africa	Rural	2000	40618.2	49310.6	60523.9
Australia and New Zealand	Rural	2001	0	0	0
Central Asia and Southern Asia	Rural	2001	924341	968746	1.00032e+06
Eastern Asia and South-eastern Asia	Rural	2001	677949	904194	1.05005e+06
Latin America & the Caribbean	Rural	2001	63355.1	71607	79843.1
Northern America and Europe	Rural	2001	9856.71	15175.4	22938.1
Oceania excluding Australia and New Zealand	Rural	2001	5583.39	5995.93	6133.48
Sub-Saharan Africa	Rural	2001	431991	437896	441720
Western Asia and Northern Africa	Rural	2001	39164.5	47314.4	57104.5
Australia and New Zealand	Rural	2002	0	0	0
Central Asia and Southern Asia	Rural	2002	928000	975883	1.00987e+06
Eastern Asia and South-eastern Asia	Rural	2002	657090	893620	1.03142e+06
Latin America & the Caribbean	Rural	2002	62119	70110.7	78574.6
Northern America and Europe	Rural	2002	9521.1	14252.3	22286.6
Oceania excluding Australia and New Zealand	Rural	2002	5699.64	6132.8	6272.68
Sub-Saharan Africa	Rural	2002	440405	446449	450262
Western Asia and Northern Africa	Rural	2002	37701.8	44996.5	54762.6
Australia and New Zealand	Rural	2003	0	0	0
Central Asia and Southern Asia	Rural	2003	933058	982189	1.0185e+06
Eastern Asia and South-eastern Asia	Rural	2003	675913	884609	1.0163e+06
Latin America & the Caribbean	Rural	2003	60911.6	68787.8	76737.3
Northern America and Europe	Rural	2003	9134.64	13344.6	21643.8
Oceania excluding Australia and New Zealand	Rural	2003	5855.93	6272.83	6405.59
Sub-Saharan Africa	Rural	2003	449202	454974	458977
Western Asia and Northern Africa	Rural	2003	36089.3	43134.1	52080.5
Australia and New Zealand	Rural	2004	0	0	0
Central Asia and Southern Asia	Rural	2004	937632	988447	1.02374e+06
Eastern Asia and South-eastern Asia	Rural	2004	668607	867939	997549
Latin America & the Caribbean	Rural	2004	60024.7	67635.4	75701.7
Northern America and Europe	Rural	2004	8714	12629.8	21924.4
Oceania excluding Australia and New Zealand	Rural	2004	5998.46	6416.32	6552.71
Sub-Saharan Africa	Rural	2004	457918	463758	467697
Western Asia and Northern Africa	Rural	2004	35018.1	41648.2	50125.4
Australia and New Zealand	Rural	2005	0	0	0
Central Asia and Southern Asia	Rural	2005	938490	993801	1.03196e+06
Eastern Asia and South-eastern Asia	Rural	2005	639535	852889	978017
Latin America & the Caribbean	Rural	2005	58613.6	66312	74157.8
Northern America and Europe	Rural	2005	8466.49	12049.6	21125
Oceania excluding Australia and New Zealand	Rural	2005	6128.4	6558.35	6697.52
Sub-Saharan Africa	Rural	2005	466615	472565	476681
Western Asia and Northern Africa	Rural	2005	33802.9	40354.7	48623.5
Australia and New Zealand	Rural	2006	0	0	0
Central Asia and Southern Asia	Rural	2006	939358	997871	1.03855e+06
Eastern Asia and South-eastern Asia	Rural	2006	642893	835784	963169
Latin America & the Caribbean	Rural	2006	57512.8	64985	72519.9
Northern America and Europe	Rural	2006	8198.14	11617.4	21472.9
Oceania excluding Australia and New Zealand	Rural	2006	6275.84	6707.06	6844.33
Sub-Saharan Africa	Rural	2006	475944	481811	486050
Western Asia and Northern Africa	Rural	2006	33272.7	39166.9	47065.4
Australia and New Zealand	Rural	2007	0	0	0
Central Asia and Southern Asia	Rural	2007	941859	1.00004e+06	1.04251e+06
Eastern Asia and South-eastern Asia	Rural	2007	622355	818585	947212
Latin America & the Caribbean	Rural	2007	56675.2	63941.8	71506.7
Northern America and Europe	Rural	2007	8026.72	11389.7	21142
Oceania excluding Australia and New Zealand	Rural	2007	6433.35	6854.59	6995.47
Sub-Saharan Africa	Rural	2007	485725	491526	495841
Western Asia and Northern Africa	Rural	2007	32093	38175.7	45433.5
Australia and New Zealand	Rural	2008	0	0	0
Central Asia and Southern Asia	Rural	2008	942598	1.00284e+06	1.04818e+06
Eastern Asia and South-eastern Asia	Rural	2008	606103	797178	927215
Latin America & the Caribbean	Rural	2008	55888	62627.2	69725.2
Northern America and Europe	Rural	2008	7809.51	11334.5	23765.7
Oceania excluding Australia and New Zealand	Rural	2008	6553.69	7007.88	7149.01
Sub-Saharan Africa	Rural	2008	495399	500829	505162
Western Asia and Northern Africa	Rural	2008	31518.2	37369.3	44516.7
Australia and New Zealand	Rural	2009	0	0	0
Central Asia and Southern Asia	Rural	2009	937892	1.00351e+06	1.05245e+06
Eastern Asia and South-eastern Asia	Rural	2009	579027	775836	906976
Latin America & the Caribbean	Rural	2009	54845.9	61593.5	68556.7
Northern America and Europe	Rural	2009	7722.22	11386.1	24742.3
Oceania excluding Australia and New Zealand	Rural	2009	6663.66	7159.03	7300.7
Sub-Saharan Africa	Rural	2009	504334	510293	514601
Western Asia and Northern Africa	Rural	2009	30658.6	36514.8	43389.8
Australia and New Zealand	Rural	2010	0	0	0
Central Asia and Southern Asia	Rural	2010	932346	1.00076e+06	1.05226e+06
Eastern Asia and South-eastern Asia	Rural	2010	564806	749068	883687
Latin America & the Caribbean	Rural	2010	53902.2	60402	67654.6
Northern America and Europe	Rural	2010	7636.5	11608.7	25276
Oceania excluding Australia and New Zealand	Rural	2010	6748.21	7309.22	7454.33
Sub-Saharan Africa	Rural	2010	513801	519920	524573
Western Asia and Northern Africa	Rural	2010	30199.8	35988.5	42517.8
Australia and New Zealand	Rural	2011	0	0	0
Central Asia and Southern Asia	Rural	2011	925177	999091	1.05195e+06
Eastern Asia and South-eastern Asia	Rural	2011	543735	724922	865370
Latin America & the Caribbean	Rural	2011	53011.6	59172.1	66083.1
Northern America and Europe	Rural	2011	7633.08	11847.6	26202
Oceania excluding Australia and New Zealand	Rural	2011	6898.39	7460.89	7610.39
Sub-Saharan Africa	Rural	2011	523378	529498	534091
Western Asia and Northern Africa	Rural	2011	29412	35487.4	42156.4
Australia and New Zealand	Rural	2012	0	0	0
Central Asia and Southern Asia	Rural	2012	917773	993087	1.0522e+06
Eastern Asia and South-eastern Asia	Rural	2012	513102	701518	844926
Latin America & the Caribbean	Rural	2012	51740.5	57969.4	64573.9
Northern America and Europe	Rural	2012	7722.32	12176.5	28387.1
Oceania excluding Australia and New Zealand	Rural	2012	7026.3	7615.82	7767.69
Sub-Saharan Africa	Rural	2012	532850	539495	544468
Western Asia and Northern Africa	Rural	2012	29085.6	35002.1	41569.5
Australia and New Zealand	Rural	2013	0	0	0
Central Asia and Southern Asia	Rural	2013	907984	985730	1.05132e+06
Eastern Asia and South-eastern Asia	Rural	2013	496225	677513	823206
Latin America & the Caribbean	Rural	2013	50607.3	56566.6	63672.3
Northern America and Europe	Rural	2013	7710.21	12654.6	31794.4
Oceania excluding Australia and New Zealand	Rural	2013	7108.63	7755.73	7922.5
Sub-Saharan Africa	Rural	2013	542630	549676	554511
Western Asia and Northern Africa	Rural	2013	28380.1	34602.5	41307.5
Australia and New Zealand	Rural	2014	0	0	0
Central Asia and Southern Asia	Rural	2014	891556	974327	1.05153e+06
Eastern Asia and South-eastern Asia	Rural	2014	449517	649513	807045
Latin America & the Caribbean	Rural	2014	49228	55268.3	62102.3
Northern America and Europe	Rural	2014	7692.35	13109.9	32634.1
Oceania excluding Australia and New Zealand	Rural	2014	7137.51	7906.45	8073.63
Sub-Saharan Africa	Rural	2014	552751	559717	564697
Western Asia and Northern Africa	Rural	2014	27382.1	34346.3	41957.3
Australia and New Zealand	Rural	2015	0	0	0
Central Asia and Southern Asia	Rural	2015	864714	960961	1.04777e+06
Eastern Asia and South-eastern Asia	Rural	2015	421673	625275	783901
Latin America & the Caribbean	Rural	2015	47676.8	53744.5	61116.4
Northern America and Europe	Rural	2015	7700.79	13722.4	35167.1
Oceania excluding Australia and New Zealand	Rural	2015	7125.83	8064.93	8227.57
Sub-Saharan Africa	Rural	2015	562162	569742	574932
Western Asia and Northern Africa	Rural	2015	27096	34086.8	41705.8
Australia and New Zealand	Rural	2016	0	0	0
Central Asia and Southern Asia	Rural	2016	837502	944254	1.03929e+06
Eastern Asia and South-eastern Asia	Rural	2016	378314	597941	767549
Latin America & the Caribbean	Rural	2016	46120.2	52288.8	59947.6
Northern America and Europe	Rural	2016	7632.14	14201.3	37135.3
Oceania excluding Australia and New Zealand	Rural	2016	7216.33	8207.19	8381.18
Sub-Saharan Africa	Rural	2016	571009	579849	585284
Western Asia and Northern Africa	Rural	2016	25830.3	33869.5	42226.7
Australia and New Zealand	Rural	2017	0	0	0
Central Asia and Southern Asia	Rural	2017	801964	928666	1.03552e+06
Eastern Asia and South-eastern Asia	Rural	2017	345408	571503	747905
Latin America & the Caribbean	Rural	2017	44630.2	50815	58500.5
Northern America and Europe	Rural	2017	7740.74	14813	38752.5
Oceania excluding Australia and New Zealand	Rural	2017	7198.38	8359.97	8534.46
Sub-Saharan Africa	Rural	2017	581006	589628	595724
Western Asia and Northern Africa	Rural	2017	24949.2	33762	42938.5
Australia and New Zealand	Rural	2018	0	0	0
Central Asia and Southern Asia	Rural	2018	758341	904778	1.03579e+06
Eastern Asia and South-eastern Asia	Rural	2018	307315	549254	735055
Latin America & the Caribbean	Rural	2018	43001.3	49548.4	57711.9
Northern America and Europe	Rural	2018	7936.83	15270.4	40680.3
Oceania excluding Australia and New Zealand	Rural	2018	7102.16	8505.08	8688.86
Sub-Saharan Africa	Rural	2018	588947	599492	605951
Western Asia and Northern Africa	Rural	2018	23709.1	33371.7	43753.1
Australia and New Zealand	Rural	2019	0	0	0
Central Asia and Southern Asia	Rural	2019	704233	883651	1.0335e+06
Eastern Asia and South-eastern Asia	Rural	2019	276456	524481	712081
Latin America & the Caribbean	Rural	2019	41635	48322.5	56576.5
Northern America and Europe	Rural	2019	7708.46	15853.4	42715.3
Oceania excluding Australia and New Zealand	Rural	2019	7115.01	8647.64	8838.06
Sub-Saharan Africa	Rural	2019	598970	609360	616294
Western Asia and Northern Africa	Rural	2019	22404.1	33445.8	44529.4
Australia and New Zealand	Rural	2020	0	0	0
Central Asia and Southern Asia	Rural	2020	646431	855146	1.03237e+06
Eastern Asia and South-eastern Asia	Rural	2020	247790	500466	694035
Latin America & the Caribbean	Rural	2020	40012.4	46907.1	55916.2
Northern America and Europe	Rural	2020	7786.84	16483.1	44461.9
Oceania excluding Australia and New Zealand	Rural	2020	6991.43	8795.26	8989.03
Sub-Saharan Africa	Rural	2020	606384	618761	626464
Western Asia and Northern Africa	Rural	2020	21337	33350.8	45447.1
Australia and New Zealand	Rural	2021	0	0	0
Central Asia and Southern Asia	Rural	2021	600881	829486	1.024e+06
Eastern Asia and South-eastern Asia	Rural	2021	225287	481885	676179
Latin America & the Caribbean	Rural	2021	38086.4	45786.7	55592
Northern America and Europe	Rural	2021	7775.97	16865.5	45645.5
Oceania excluding Australia and New Zealand	Rural	2021	6863.22	8937.21	9138.37
Sub-Saharan Africa	Rural	2021	613944	628167	636728
Western Asia and Northern Africa	Rural	2021	20389.1	33247.7	46251.4
Australia and New Zealand	Rural	2022	0	0	0
Central Asia and Southern Asia	Rural	2022	550111	802686	1.02218e+06
Eastern Asia and South-eastern Asia	Rural	2022	197964	458020	663527
Latin America & the Caribbean	Rural	2022	36610.7	44637.1	54940.2
Northern America and Europe	Rural	2022	7652.66	17352.6	46267.9
Oceania excluding Australia and New Zealand	Rural	2022	6681.13	9086.52	9286.66
Sub-Saharan Africa	Rural	2022	622256	637452	646893
Western Asia and Northern Africa	Rural	2022	19378.8	32919.6	47598.2
Australia and New Zealand	Rural	2023	0	0	0
Central Asia and Southern Asia	Rural	2023	492099	771029	1.02329e+06
Eastern Asia and South-eastern Asia	Rural	2023	182787	436905	645759
Latin America & the Caribbean	Rural	2023	34930.2	43538.7	54503.6
Northern America and Europe	Rural	2023	7597.02	17756.2	47167.8
Oceania excluding Australia and New Zealand	Rural	2023	6546.25	9228.77	9433.19
Sub-Saharan Africa	Rural	2023	628721	646310	656932
Western Asia and Northern Africa	Rural	2023	18341.5	33000.3	48640.1
Australia and New Zealand	Rural	2024	0	0	0
Central Asia and Southern Asia	Rural	2024	449883	740093	1.01971e+06
Eastern Asia and South-eastern Asia	Rural	2024	163830	417443	628793
Latin America & the Caribbean	Rural	2024	33525.5	42436.5	54576.5
Northern America and Europe	Rural	2024	7889.28	18314.5	47344.8
Oceania excluding Australia and New Zealand	Rural	2024	6206.34	9366.28	9579.15
Sub-Saharan Africa	Rural	2024	635653	655360	666809
Western Asia and Northern Africa	Rural	2024	17913.4	32885.3	49613.3
Australia and New Zealand	Rural	2025	0	0	0
Central Asia and Southern Asia	Rural	2025	401306	707426	1.01257e+06
Eastern Asia and South-eastern Asia	Rural	2025	153004	400936	612706
Latin America & the Caribbean	Rural	2025	32488.3	41520.4	53517.4
Northern America and Europe	Rural	2025	7684.89	19176	47757.9
Oceania excluding Australia and New Zealand	Rural	2025	6062.74	9505.78	9721.23
Sub-Saharan Africa	Rural	2025	641620	664549	676949
Western Asia and Northern Africa	Rural	2025	17123.9	33137	50862.3
Australia and New Zealand	Rural	2026	0	0	0
Central Asia and Southern Asia	Rural	2026	369039	672110	1.00593e+06
Eastern Asia and South-eastern Asia	Rural	2026	140600	381627	600617
Latin America & the Caribbean	Rural	2026	30838	40642.5	53814.8
Northern America and Europe	Rural	2026	7661.42	19710.9	48519.9
Oceania excluding Australia and New Zealand	Rural	2026	6011.85	9642.4	9861.36
Sub-Saharan Africa	Rural	2026	646152	673089	686410
Western Asia and Northern Africa	Rural	2026	16133.1	32970.5	51986.9
Australia and New Zealand	Rural	2027	0	0	0
Central Asia and Southern Asia	Rural	2027	328841	641543	1.00364e+06
Eastern Asia and South-eastern Asia	Rural	2027	129461	367986	586819
Latin America & the Caribbean	Rural	2027	30006.3	39897.4	53082.5
Northern America and Europe	Rural	2027	7760.84	20120.9	47942.7
Oceania excluding Australia and New Zealand	Rural	2027	5634.54	9768.76	10004
Sub-Saharan Africa	Rural	2027	651548	681600	696696
Western Asia and Northern Africa	Rural	2027	15471.5	33358.1	52888.8
Australia and New Zealand	Rural	2028	0	0	0
Central Asia and Southern Asia	Rural	2028	300652	607543	998442
Eastern Asia and South-eastern Asia	Rural	2028	119892	351039	574383
Latin America & the Caribbean	Rural	2028	28554.2	38966.1	53268.6
Northern America and Europe	Rural	2028	7712.96	20020.9	48323.2
Oceania excluding Australia and New Zealand	Rural	2028	5408.06	9898.27	10138.4
Sub-Saharan Africa	Rural	2028	656509	690440	706263
Western Asia and Northern Africa	Rural	2028	15309.2	33134.8	54205.5
Australia and New Zealand	Rural	2029	0	0	0
Central Asia and Southern Asia	Rural	2029	267729	575592	985848
Eastern Asia and South-eastern Asia	Rural	2029	115678	337047	560119
Latin America & the Caribbean	Rural	2029	27661.3	38388.5	53215.7
Northern America and Europe	Rural	2029	7722.51	20416.3	47960.5
Oceania excluding Australia and New Zealand	Rural	2029	4989.07	10019.2	10270.1
Sub-Saharan Africa	Rural	2029	661208	698006	715680
Western Asia and Northern Africa	Rural	2029	14893.6	33339.6	54911.2
Australia and New Zealand	Rural	2030	0	0	0
Central Asia and Southern Asia	Rural	2030	245108	540799	974680
Eastern Asia and South-eastern Asia	Rural	2030	107553	320386	550173
Latin America & the Caribbean	Rural	2030	26745	37679.5	53432.4
Northern America and Europe	Rural	2030	7795.63	21236.2	48076.5
Oceania excluding Australia and New Zealand	Rural	2030	4848.3	10152.2	10401.1
Sub-Saharan Africa	Rural	2030	661636	706328	725479
Western Asia and Northern Africa	Rural	2030	14356.9	33725.9	56562.6
Australia and New Zealand	Overall	1990	0	0	0
Central Asia and Southern Asia	Overall	1990	920990	1.02437e+06	1.09653e+06
Eastern Asia and South-eastern Asia	Overall	1990	654022	1.08018e+06	1.41631e+06
Latin America & the Caribbean	Overall	1990	108384	130335	155402
Northern America and Europe	Overall	1990	18708.4	32824	55514.8
Oceania excluding Australia and New Zealand	Overall	1990	4691.56	5316.17	5620.28
Sub-Saharan Africa	Overall	1990	426784	444775	455218
Western Asia and Northern Africa	Overall	1990	59524	81476.3	109129
Australia and New Zealand	Overall	1991	0	0	0
Central Asia and Southern Asia	Overall	1991	928066	1.03696e+06	1.11173e+06
Eastern Asia and South-eastern Asia	Overall	1991	692938	1.0937e+06	1.43016e+06
Latin America & the Caribbean	Overall	1991	106801	127386	152337
Northern America and Europe	Overall	1991	18266.3	31556.5	51267.1
Oceania excluding Australia and New Zealand	Overall	1991	4823.36	5441.55	5737.21
Sub-Saharan Africa	Overall	1991	441176	457765	467899
Western Asia and Northern Africa	Overall	1991	60108.6	80752	107082
Australia and New Zealand	Overall	1992	0	0	0
Central Asia and Southern Asia	Overall	1992	943514	1.05039e+06	1.13188e+06
Eastern Asia and South-eastern Asia	Overall	1992	732592	1.11174e+06	1.41277e+06
Latin America & the Caribbean	Overall	1992	104409	124790	149355
Northern America and Europe	Overall	1992	18137.7	30610	49853
Oceania excluding Australia and New Zealand	Overall	1992	4980.76	5559.03	5858.96
Sub-Saharan Africa	Overall	1992	455750	470749	480308
Western Asia and Northern Africa	Overall	1992	59685.4	80093.2	104824
Australia and New Zealand	Overall	1993	0	0	0
Central Asia and Southern Asia	Overall	1993	947680	1.06237e+06	1.14483e+06
Eastern Asia and South-eastern Asia	Overall	1993	766968	1.11996e+06	1.41329e+06
Latin America & the Caribbean	Overall	1993	102371	121657	144800
Northern America and Europe	Overall	1993	17600.4	29589.7	49037
Oceania excluding Australia and New Zealand	Overall	1993	5114.98	5693.78	5988.24
Sub-Saharan Africa	Overall	1993	470091	484052	493197
Western Asia and Northern Africa	Overall	1993	60021.6	78815.1	102381
Australia and New Zealand	Overall	1994	0	0	0
Central Asia and Southern Asia	Overall	1994	953022	1.0726e+06	1.16149e+06
Eastern Asia and South-eastern Asia	Overall	1994	807521	1.13149e+06	1.41458e+06
Latin America & the Caribbean	Overall	1994	100756	119273	142244
Northern America and Europe	Overall	1994	16831.7	28506.1	45628.2
Oceania excluding Australia and New Zealand	Overall	1994	5265.34	5829.84	6125.5
Sub-Saharan Africa	Overall	1994	484767	497341	505985
Western Asia and Northern Africa	Overall	1994	59906.2	77877.2	101338
Australia and New Zealand	Overall	1995	0	0	0
Central Asia and Southern Asia	Overall	1995	953869	1.08395e+06	1.1739e+06
Eastern Asia and South-eastern Asia	Overall	1995	848522	1.1406e+06	1.42186e+06
Latin America & the Caribbean	Overall	1995	98193.6	116712	140115
Northern America and Europe	Overall	1995	16952	27532.7	44068.6
Oceania excluding Australia and New Zealand	Overall	1995	5433.7	5974.5	6257.78
Sub-Saharan Africa	Overall	1995	498304	510812	519290
Western Asia and Northern Africa	Overall	1995	58946	75985.5	97597.9
Australia and New Zealand	Overall	1996	0	0	0
Central Asia and Southern Asia	Overall	1996	958810	1.09116e+06	1.19183e+06
Eastern Asia and South-eastern Asia	Overall	1996	868789	1.14547e+06	1.42906e+06
Latin America & the Caribbean	Overall	1996	96027.4	113711	137021
Northern America and Europe	Overall	1996	15893.9	26218.4	42642.9
Oceania excluding Australia and New Zealand	Overall	1996	5569.78	6108.67	6393.8
Sub-Saharan Africa	Overall	1996	512659	524837	532922
Western Asia and Northern Africa	Overall	1996	58115.8	74428.6	94919
Australia and New Zealand	Overall	1997	0	0	0
Central Asia and Southern Asia	Overall	1997	958367	1.09956e+06	1.20392e+06
Eastern Asia and South-eastern Asia	Overall	1997	892497	1.15132e+06	1.42178e+06
Latin America & the Caribbean	Overall	1997	93924.1	110688	133097
Northern America and Europe	Overall	1997	15425.4	25213	38944.7
Oceania excluding Australia and New Zealand	Overall	1997	5717.66	6255.82	6542.35
Sub-Saharan Africa	Overall	1997	527162	538532	546578
Western Asia and Northern Africa	Overall	1997	57303.1	72102.6	90073.3
Australia and New Zealand	Overall	1998	0	0	0
Central Asia and Southern Asia	Overall	1998	961274	1.10207e+06	1.21713e+06
Eastern Asia and South-eastern Asia	Overall	1998	911761	1.15792e+06	1.41531e+06
Latin America & the Caribbean	Overall	1998	90593.1	108325	130707
Northern America and Europe	Overall	1998	15203.3	23977.7	38236.7
Oceania excluding Australia and New Zealand	Overall	1998	5865.28	6399.15	6690.39
Sub-Saharan Africa	Overall	1998	542397	552776	560787
Western Asia and Northern Africa	Overall	1998	55567.1	69380.3	86251.8
Australia and New Zealand	Overall	1999	0	0	0
Central Asia and Southern Asia	Overall	1999	959455	1.10882e+06	1.2305e+06
Eastern Asia and South-eastern Asia	Overall	1999	919771	1.16051e+06	1.40669e+06
Latin America & the Caribbean	Overall	1999	89050.8	105418	127374
Northern America and Europe	Overall	1999	14724.1	22748	36702.7
Oceania excluding Australia and New Zealand	Overall	1999	5987.03	6552.66	6856.29
Sub-Saharan Africa	Overall	1999	556830	566952	575292
Western Asia and Northern Africa	Overall	1999	54161.5	66253.2	81374.9
Australia and New Zealand	Overall	2000	0	0	0
Central Asia and Southern Asia	Overall	2000	945447	1.11228e+06	1.24147e+06
Eastern Asia and South-eastern Asia	Overall	2000	928744	1.15859e+06	1.40377e+06
Latin America & the Caribbean	Overall	2000	85834.3	102612	124314
Northern America and Europe	Overall	2000	13991.6	21713.3	35071.6
Oceania excluding Australia and New Zealand	Overall	2000	6101.01	6694.95	7009.43
Sub-Saharan Africa	Overall	2000	572022	581416	589171
Western Asia and Northern Africa	Overall	2000	52048.6	63322.9	78514.1
Australia and New Zealand	Overall	2001	0	0	0
Central Asia and Southern Asia	Overall	2001	952436	1.11388e+06	1.25168e+06
Eastern Asia and South-eastern Asia	Overall	2001	915365	1.15319e+06	1.39622e+06
Latin America & the Caribbean	Overall	2001	83294	100193	122606
Northern America and Europe	Overall	2001	13320.1	20277.6	35306.1
Oceania excluding Australia and New Zealand	Overall	2001	6259.94	6846.66	7160.56
Sub-Saharan Africa	Overall	2001	586877	596172	603697
Western Asia and Northern Africa	Overall	2001	49627.5	60427.7	73797.8
Australia and New Zealand	Overall	2002	0	0	0
Central Asia and Southern Asia	Overall	2002	940866	1.11636e+06	1.26293e+06
Eastern Asia and South-eastern Asia	Overall	2002	928046	1.14847e+06	1.38182e+06
Latin America & the Caribbean	Overall	2002	82289.9	97981.4	119863
Northern America and Europe	Overall	2002	12737.9	19096.8	34518.3
Oceania excluding Australia and New Zealand	Overall	2002	6388.73	6994.59	7335.97
Sub-Saharan Africa	Overall	2002	601790	611091	618661
Western Asia and Northern Africa	Overall	2002	47837.5	57841.1	70889.1
Australia and New Zealand	Overall	2003	0	0	0
Central Asia and Southern Asia	Overall	2003	936234	1.11449e+06	1.27904e+06
Eastern Asia and South-eastern Asia	Overall	2003	919255	1.14012e+06	1.39808e+06
Latin America & the Caribbean	Overall	2003	80173.3	96030.9	117791
Northern America and Europe	Overall	2003	12073	18185.5	33912.4
Oceania excluding Australia and New Zealand	Overall	2003	6506.32	7149.77	7496.31
Sub-Saharan Africa	Overall	2003	617303	626092	633821
Western Asia and Northern Africa	Overall	2003	46044	55599.4	67439.1
Australia and New Zealand	Overall	2004	0	0	0
Central Asia and Southern Asia	Overall	2004	926056	1.12114e+06	1.28425e+06
Eastern Asia and South-eastern Asia	Overall	2004	912278	1.1276e+06	1.37842e+06
Latin America & the Caribbean	Overall	2004	78570.8	93693.5	115293
Northern America and Europe	Overall	2004	11895.3	17382.5	34905.9
Oceania excluding Australia and New Zealand	Overall	2004	6659.45	7307.04	7654.42
Sub-Saharan Africa	Overall	2004	632447	641659	649343
Western Asia and Northern Africa	Overall	2004	44484.1	53301.1	64770.8
Australia and New Zealand	Overall	2005	0	0	0
Central Asia and Southern Asia	Overall	2005	920450	1.12287e+06	1.29396e+06
Eastern Asia and South-eastern Asia	Overall	2005	887540	1.11467e+06	1.36394e+06
Latin America & the Caribbean	Overall	2005	76870.6	92088.2	112884
Northern America and Europe	Overall	2005	11224.6	16691.6	34808.1
Oceania excluding Australia and New Zealand	Overall	2005	6782.88	7463.99	7843.35
Sub-Saharan Africa	Overall	2005	648246	657777	665828
Western Asia and Northern Africa	Overall	2005	42694	51612.8	62422.2
Australia and New Zealand	Overall	2006	0	0	0
Central Asia and Southern Asia	Overall	2006	908403	1.11917e+06	1.30302e+06
Eastern Asia and South-eastern Asia	Overall	2006	865088	1.09393e+06	1.33298e+06
Latin America & the Caribbean	Overall	2006	75482	89944.8	111685
Northern America and Europe	Overall	2006	10972.6	16398.8	36097.8
Oceania excluding Australia and New Zealand	Overall	2006	6986.2	7620.05	8005.41
Sub-Saharan Africa	Overall	2006	664783	674007	682420
Western Asia and Northern Africa	Overall	2006	41154.2	49736.6	60009.2
Australia and New Zealand	Overall	2007	0	0	0
Central Asia and Southern Asia	Overall	2007	901053	1.12153e+06	1.30933e+06
Eastern Asia and South-eastern Asia	Overall	2007	842613	1.07353e+06	1.32007e+06
Latin America & the Caribbean	Overall	2007	74403.5	88711.3	110645
Northern America and Europe	Overall	2007	10899.8	16222.2	38861.3
Oceania excluding Australia and New Zealand	Overall	2007	7089.27	7787.4	8172.87
Sub-Saharan Africa	Overall	2007	681306	691184	699197
Western Asia and Northern Africa	Overall	2007	39777.7	48312.6	58876.9
Australia and New Zealand	Overall	2008	0	0	0
Central Asia and Southern Asia	Overall	2008	900930	1.12476e+06	1.31465e+06
Eastern Asia and South-eastern Asia	Overall	2008	802074	1.04359e+06	1.29507e+06
Latin America & the Caribbean	Overall	2008	72828.7	87495.3	108019
Northern America and Europe	Overall	2008	10471.6	16230.2	41541.2
Oceania excluding Australia and New Zealand	Overall	2008	7270.51	7951.73	8352.52
Sub-Saharan Africa	Overall	2008	699208	708727	717127
Western Asia and Northern Africa	Overall	2008	38564.8	46932.6	57225.2
Australia and New Zealand	Overall	2009	0	0	0
Central Asia and Southern Asia	Overall	2009	887613	1.11703e+06	1.31887e+06
Eastern Asia and South-eastern Asia	Overall	2009	782162	1.02037e+06	1.27191e+06
Latin America & the Caribbean	Overall	2009	72019.8	86259.7	106759
Northern America and Europe	Overall	2009	10437.5	16786.6	44645.3
Oceania excluding Australia and New Zealand	Overall	2009	7375.25	8142.98	8533.91
Sub-Saharan Africa	Overall	2009	716351	726818	735397
Western Asia and Northern Africa	Overall	2009	37392.6	45824.4	55912.7
Australia and New Zealand	Overall	2010	0	0	0
Central Asia and Southern Asia	Overall	2010	885228	1.11431e+06	1.32083e+06
Eastern Asia and South-eastern Asia	Overall	2010	747019	990017	1.24221e+06
Latin America & the Caribbean	Overall	2010	70807.4	85325.1	104438
Northern America and Europe	Overall	2010	10551.1	17622.1	47662.3
Oceania excluding Australia and New Zealand	Overall	2010	7552.07	8291.61	8730.89
Sub-Saharan Africa	Overall	2010	734540	745044	754534
Western Asia and Northern Africa	Overall	2010	36612	44929.4	54696.9
Australia and New Zealand	Overall	2011	0	0	0
Central Asia and Southern Asia	Overall	2011	866181	1.11505e+06	1.32611e+06
Eastern Asia and South-eastern Asia	Overall	2011	718880	960293	1.21929e+06
Latin America & the Caribbean	Overall	2011	70291	84174	104148
Northern America and Europe	Overall	2011	10770.5	18220	51472.1
Oceania excluding Australia and New Zealand	Overall	2011	7682.67	8469.14	8920.05
Sub-Saharan Africa	Overall	2011	752381	763952	773620
Western Asia and Northern Africa	Overall	2011	35972.3	44289.1	54268.4
Australia and New Zealand	Overall	2012	0	0	0
Central Asia and Southern Asia	Overall	2012	851431	1.10411e+06	1.3259e+06
Eastern Asia and South-eastern Asia	Overall	2012	687906	930481	1.20277e+06
Latin America & the Caribbean	Overall	2012	69361.3	82833.2	103352
Northern America and Europe	Overall	2012	10755.1	19468.7	55465.5
Oceania excluding Australia and New Zealand	Overall	2012	7811.68	8637.08	9084.02
Sub-Saharan Africa	Overall	2012	771229	782891	793225
Western Asia and Northern Africa	Overall	2012	35215.9	43725.7	54413.7
Australia and New Zealand	Overall	2013	0	0	0
Central Asia and Southern Asia	Overall	2013	841077	1.09024e+06	1.33027e+06
Eastern Asia and South-eastern Asia	Overall	2013	646209	897269	1.19174e+06
Latin America & the Caribbean	Overall	2013	67934	81923.7	101844
Northern America and Europe	Overall	2013	11074.4	20786.8	62578
Oceania excluding Australia and New Zealand	Overall	2013	7898.77	8810.33	9296.78
Sub-Saharan Africa	Overall	2013	789939	802184	812712
Western Asia and Northern Africa	Overall	2013	34138.1	43160.4	53823.5
Australia and New Zealand	Overall	2014	0	0	0
Central Asia and Southern Asia	Overall	2014	825822	1.0795e+06	1.32017e+06
Eastern Asia and South-eastern Asia	Overall	2014	616274	870198	1.15648e+06
Latin America & the Caribbean	Overall	2014	67348.7	80605.8	100362
Northern America and Europe	Overall	2014	11467.4	22467.4	67999.8
Oceania excluding Australia and New Zealand	Overall	2014	7987.18	8982.81	9473.29
Sub-Saharan Africa	Overall	2014	807637	821182	832441
Western Asia and Northern Africa	Overall	2014	33494.3	42748.3	53833.1
Australia and New Zealand	Overall	2015	0	0	0
Central Asia and Southern Asia	Overall	2015	804997	1.06846e+06	1.31775e+06
Eastern Asia and South-eastern Asia	Overall	2015	579686	844620	1.14982e+06
Latin America & the Caribbean	Overall	2015	65872.5	79727.4	100998
Northern America and Europe	Overall	2015	11586.1	24040.4	74207.7
Oceania excluding Australia and New Zealand	Overall	2015	8062.91	9157.57	9676.35
Sub-Saharan Africa	Overall	2015	825674	839846	851975
Western Asia and Northern Africa	Overall	2015	32520.7	42583.7	53788.5
Australia and New Zealand	Overall	2016	0	0	0
Central Asia and Southern Asia	Overall	2016	764348	1.04543e+06	1.31473e+06
Eastern Asia and South-eastern Asia	Overall	2016	542353	811649	1.12712e+06
Latin America & the Caribbean	Overall	2016	64995.9	78969.6	98409.9
Northern America and Europe	Overall	2016	11999.9	25765.3	82708.7
Oceania excluding Australia and New Zealand	Overall	2016	8110.97	9326.58	9884.16
Sub-Saharan Africa	Overall	2016	842123	858443	871830
Western Asia and Northern Africa	Overall	2016	32050.9	42416.5	54207.5
Australia and New Zealand	Overall	2017	0	0	0
Central Asia and Southern Asia	Overall	2017	737847	1.02538e+06	1.30442e+06
Eastern Asia and South-eastern Asia	Overall	2017	492492	787359	1.12844e+06
Latin America & the Caribbean	Overall	2017	63907.3	78093.4	98700.9
Northern America and Europe	Overall	2017	12042.8	28237.3	90087.9
Oceania excluding Australia and New Zealand	Overall	2017	8176.59	9504.44	10082
Sub-Saharan Africa	Overall	2017	858351	876233	891722
Western Asia and Northern Africa	Overall	2017	30893.5	42205.7	55440
Australia and New Zealand	Overall	2018	0	0	0
Central Asia and Southern Asia	Overall	2018	705014	1.00589e+06	1.29042e+06
Eastern Asia and South-eastern Asia	Overall	2018	456345	758139	1.12608e+06
Latin America & the Caribbean	Overall	2018	63141.3	77453.7	98861
Northern America and Europe	Overall	2018	12703.4	30151.8	97413
Oceania excluding Australia and New Zealand	Overall	2018	8217.76	9672.45	10288
Sub-Saharan Africa	Overall	2018	874290	893830	911258
Western Asia and Northern Africa	Overall	2018	30316.8	42316.3	56426.3
Australia and New Zealand	Overall	2019	0	0	0
Central Asia and Southern Asia	Overall	2019	674726	983474	1.28899e+06
Eastern Asia and South-eastern Asia	Overall	2019	428015	730174	1.11509e+06
Latin America & the Caribbean	Overall	2019	62010	77191.6	98729.9
Northern America and Europe	Overall	2019	12693.7	32894.8	102845
Oceania excluding Australia and New Zealand	Overall	2019	8164.55	9844.17	10482.8
Sub-Saharan Africa	Overall	2019	889472	911724	931073
Western Asia and Northern Africa	Overall	2019	28541.7	42479.8	57139.4
Australia and New Zealand	Overall	2020	0	0	0
Central Asia and Southern Asia	Overall	2020	642343	957744	1.2829e+06
Eastern Asia and South-eastern Asia	Overall	2020	385206	716622	1.1284e+06
Latin America & the Caribbean	Overall	2020	61323.5	77097.5	99944.3
Northern America and Europe	Overall	2020	13086.5	34880.3	111602
Oceania excluding Australia and New Zealand	Overall	2020	8097.48	10029.7	10696.2
Sub-Saharan Africa	Overall	2020	903798	930080	951401
Western Asia and Northern Africa	Overall	2020	28269.6	42727	58991.4
Australia and New Zealand	Overall	2021	0	0	0
Central Asia and Southern Asia	Overall	2021	596267	926775	1.28141e+06
Eastern Asia and South-eastern Asia	Overall	2021	349876	681906	1.13292e+06
Latin America & the Caribbean	Overall	2021	60450.3	77344	102488
Northern America and Europe	Overall	2021	13670	38045.2	117003
Oceania excluding Australia and New Zealand	Overall	2021	8047.17	10202	10907.2
Sub-Saharan Africa	Overall	2021	921314	948984	973499
Western Asia and Northern Africa	Overall	2021	27832.4	43156.9	60687
Australia and New Zealand	Overall	2022	0	0	0
Central Asia and Southern Asia	Overall	2022	566161	895190	1.26128e+06
Eastern Asia and South-eastern Asia	Overall	2022	326892	670221	1.15726e+06
Latin America & the Caribbean	Overall	2022	59648.3	77530.7	104228
Northern America and Europe	Overall	2022	13818.9	41072.8	124716
Oceania excluding Australia and New Zealand	Overall	2022	7844.99	10370.5	11109.1
Sub-Saharan Africa	Overall	2022	936364	968104	995735
Western Asia and Northern Africa	Overall	2022	26851.8	43450.3	62228.2
Australia and New Zealand	Overall	2023	0	0	0
Central Asia and Southern Asia	Overall	2023	505197	867698	1.26802e+06
Eastern Asia and South-eastern Asia	Overall	2023	306351	645214	1.16743e+06
Latin America & the Caribbean	Overall	2023	59488.6	77944.9	108829
Northern America and Europe	Overall	2023	14722.5	44838.3	131707
Oceania excluding Australia and New Zealand	Overall	2023	7749.04	10578.5	11320
Sub-Saharan Africa	Overall	2023	953542	989051	1.0194e+06
Western Asia and Northern Africa	Overall	2023	26381.1	44366.3	64696.7
Australia and New Zealand	Overall	2024	0	0	0
Central Asia and Southern Asia	Overall	2024	482552	834312	1.26652e+06
Eastern Asia and South-eastern Asia	Overall	2024	283840	634511	1.18288e+06
Latin America & the Caribbean	Overall	2024	59191.3	78933.4	111659
Northern America and Europe	Overall	2024	14208.8	47713.1	136679
Oceania excluding Australia and New Zealand	Overall	2024	7765.39	10729.8	11527.4
Sub-Saharan Africa	Overall	2024	969733	1.01035e+06	1.04398e+06
Western Asia and Northern Africa	Overall	2024	26387	44901.8	67091.9
Australia and New Zealand	Overall	2025	0	0	0
Central Asia and Southern Asia	Overall	2025	447288	807339	1.26261e+06
Eastern Asia and South-eastern Asia	Overall	2025	263096	619287	1.20106e+06
Latin America & the Caribbean	Overall	2025	58667.5	80128.3	115401
Northern America and Europe	Overall	2025	15505.4	51484.7	140907
Oceania excluding Australia and New Zealand	Overall	2025	7494.06	10905.2	11751.9
Sub-Saharan Africa	Overall	2025	986534	1.03207e+06	1.06884e+06
Western Asia and Northern Africa	Overall	2025	26171.3	45665.9	70758.6
Australia and New Zealand	Overall	2026	0	0	0
Central Asia and Southern Asia	Overall	2026	406261	771703	1.23102e+06
Eastern Asia and South-eastern Asia	Overall	2026	248415	600150	1.22785e+06
Latin America & the Caribbean	Overall	2026	58412.3	80902.8	121358
Northern America and Europe	Overall	2026	15342.8	54725.2	146845
Oceania excluding Australia and New Zealand	Overall	2026	7229.44	11074.6	11966.2
Sub-Saharan Africa	Overall	2026	1.00633e+06	1.05462e+06	1.09462e+06
Western Asia and Northern Africa	Overall	2026	26092.7	46466.2	73763.9
Australia and New Zealand	Overall	2027	0	0	0
Central Asia and Southern Asia	Overall	2027	378342	747752	1.24016e+06
Eastern Asia and South-eastern Asia	Overall	2027	229929	582877	1.22899e+06
Latin America & the Caribbean	Overall	2027	58563.4	82888.9	128980
Northern America and Europe	Overall	2027	15560.7	58633.2	149906
Oceania excluding Australia and New Zealand	Overall	2027	7053.38	11239.4	12161
Sub-Saharan Africa	Overall	2027	1.02422e+06	1.07794e+06	1.11868e+06
Western Asia and Northern Africa	Overall	2027	25902.2	48236	77720.1
Australia and New Zealand	Overall	2028	0	0	0
Central Asia and Southern Asia	Overall	2028	354052	724407	1.23313e+06
Eastern Asia and South-eastern Asia	Overall	2028	217851	575603	1.25454e+06
Latin America & the Caribbean	Overall	2028	58744.4	84567.5	135792
Northern America and Europe	Overall	2028	16426.3	61747.8	154257
Oceania excluding Australia and New Zealand	Overall	2028	6855.65	11439.9	12380.7
Sub-Saharan Africa	Overall	2028	1.0417e+06	1.10058e+06	1.1462e+06
Western Asia and Northern Africa	Overall	2028	25962.7	49308.4	81160.5
Australia and New Zealand	Overall	2029	0	0	0
Central Asia and Southern Asia	Overall	2029	321602	690495	1.23582e+06
Eastern Asia and South-eastern Asia	Overall	2029	206732	568448	1.28781e+06
Latin America & the Caribbean	Overall	2029	58020.5	86632.1	142044
Northern America and Europe	Overall	2029	16957.8	66669.9	154178
Oceania excluding Australia and New Zealand	Overall	2029	6792.86	11620.9	12588
Sub-Saharan Africa	Overall	2029	1.06119e+06	1.12457e+06	1.17602e+06
Western Asia and Northern Africa	Overall	2029	26427.8	50887.2	86169.1
Australia and New Zealand	Overall	2030	0	0	0
Central Asia and Southern Asia	Overall	2030	303083	659057	1.21921e+06
Eastern Asia and South-eastern Asia	Overall	2030	197444	552106	1.30733e+06
Latin America & the Caribbean	Overall	2030	58382.1	89569	146550
Northern America and Europe	Overall	2030	17021	70609.2	157362
Oceania excluding Australia and New Zealand	Overall	2030	6619.76	11784.8	12804.6
Sub-Saharan Africa	Overall	2030	1.07937e+06	1.14908e+06	1.20127e+06
Western Asia and Northern Africa	Overall	2030	26200.9	52838	90488
World	Urban	1990	472614	578746	729606
World	Urban	1991	484694	590485	741385
World	Urban	1992	498725	601257	744238
World	Urban	1993	508611	612875	752567
World	Urban	1994	519662	623922	758923
World	Urban	1995	529829	633243	760633
World	Urban	1996	543085	643158	765416
World	Urban	1997	549822	651103	770144
World	Urban	1998	558521	659383	768443
World	Urban	1999	565894	664182	769523
World	Urban	2000	568545	670882	775656
World	Urban	2001	579177	676904	779869
World	Urban	2002	584014	683653	785583
World	Urban	2003	585986	687939	797834
World	Urban	2004	586168	692827	804334
World	Urban	2005	592954	695737	815077
World	Urban	2006	587843	695718	816188
World	Urban	2007	584597	692791	825159
World	Urban	2008	582429	693137	826357
World	Urban	2009	577038	691044	825698
World	Urban	2010	574350	687075	836055
World	Urban	2011	573286	686419	840856
World	Urban	2012	568906	686337	857743
World	Urban	2013	563443	686765	855931
World	Urban	2014	562079	686608	868858
World	Urban	2015	560967	690405	892177
World	Urban	2016	556264	693660	928631
World	Urban	2017	547138	694483	954326
World	Urban	2018	543058	698673	982892
World	Urban	2019	541674	706717	1.02788e+06
World	Urban	2020	538934	713010	1.06156e+06
World	Urban	2021	544728	721832	1.11826e+06
World	Urban	2022	553257	737439	1.17904e+06
World	Urban	2023	557647	750903	1.23688e+06
World	Urban	2024	570716	765583	1.27323e+06
World	Urban	2025	578113	785218	1.33615e+06
World	Urban	2026	593200	810428	1.39488e+06
World	Urban	2027	610545	826004	1.46057e+06
World	Urban	2028	630376	851181	1.51788e+06
World	Urban	2029	641356	878760	1.58778e+06
World	Urban	2030	663879	905748	1.64411e+06
World	Rural	1990	1.80701e+06	2.25655e+06	2.50043e+06
World	Rural	1991	1.86894e+06	2.28678e+06	2.52127e+06
World	Rural	1992	1.91966e+06	2.30925e+06	2.53936e+06
World	Rural	1993	1.96053e+06	2.32943e+06	2.55351e+06
World	Rural	1994	2.01423e+06	2.35704e+06	2.56996e+06
World	Rural	1995	2.0633e+06	2.37603e+06	2.57471e+06
World	Rural	1996	2.09108e+06	2.39428e+06	2.57941e+06
World	Rural	1997	2.11804e+06	2.4068e+06	2.58587e+06
World	Rural	1998	2.15344e+06	2.42418e+06	2.5905e+06
World	Rural	1999	2.17783e+06	2.43545e+06	2.59661e+06
World	Rural	2000	2.19679e+06	2.44479e+06	2.59752e+06
World	Rural	2001	2.22093e+06	2.44989e+06	2.60016e+06
World	Rural	2002	2.20759e+06	2.45012e+06	2.59497e+06
World	Rural	2003	2.23698e+06	2.45243e+06	2.59053e+06
World	Rural	2004	2.24613e+06	2.44775e+06	2.58497e+06
World	Rural	2005	2.22542e+06	2.44231e+06	2.57768e+06
World	Rural	2006	2.23534e+06	2.43618e+06	2.57447e+06
World	Rural	2007	2.23489e+06	2.42919e+06	2.5651e+06
World	Rural	2008	2.22529e+06	2.41705e+06	2.5552e+06
World	Rural	2009	2.20488e+06	2.40268e+06	2.54744e+06
World	Rural	2010	2.1925e+06	2.38443e+06	2.52832e+06
World	Rural	2011	2.17548e+06	2.36662e+06	2.52052e+06
World	Rural	2012	2.15371e+06	2.34613e+06	2.50449e+06
World	Rural	2013	2.12667e+06	2.32566e+06	2.48846e+06
World	Rural	2014	2.08246e+06	2.29391e+06	2.47301e+06
World	Rural	2015	2.04443e+06	2.26603e+06	2.44869e+06
World	Rural	2016	1.9882e+06	2.23064e+06	2.4248e+06
World	Rural	2017	1.94242e+06	2.19605e+06	2.40564e+06
World	Rural	2018	1.88559e+06	2.15484e+06	2.39323e+06
World	Rural	2019	1.80999e+06	2.11883e+06	2.37455e+06
World	Rural	2020	1.75657e+06	2.08023e+06	2.35913e+06
World	Rural	2021	1.68885e+06	2.04112e+06	2.33946e+06
World	Rural	2022	1.63417e+06	1.99326e+06	2.32577e+06
World	Rural	2023	1.5726e+06	1.9512e+06	2.30014e+06
World	Rural	2024	1.51555e+06	1.91347e+06	2.28386e+06
World	Rural	2025	1.4703e+06	1.87225e+06	2.26681e+06
World	Rural	2026	1.41151e+06	1.83211e+06	2.26291e+06
World	Rural	2027	1.36952e+06	1.7915e+06	2.24077e+06
World	Rural	2028	1.32637e+06	1.75374e+06	2.22911e+06
World	Rural	2029	1.2945e+06	1.72004e+06	2.20387e+06
World	Rural	2030	1.26229e+06	1.68211e+06	2.19385e+06
World	Overall	1990	2.35827e+06	2.7969e+06	3.14688e+06
World	Overall	1991	2.41488e+06	2.82884e+06	3.1847e+06
World	Overall	1992	2.48628e+06	2.86986e+06	3.19128e+06
World	Overall	1993	2.52681e+06	2.89839e+06	3.21941e+06
World	Overall	1994	2.58292e+06	2.93069e+06	3.23477e+06
World	Overall	1995	2.6426e+06	2.95994e+06	3.2663e+06
World	Overall	1996	2.67402e+06	2.98163e+06	3.28575e+06
World	Overall	1997	2.70475e+06	3.00165e+06	3.29856e+06
World	Overall	1998	2.73519e+06	3.01741e+06	3.2988e+06
World	Overall	1999	2.75518e+06	3.03443e+06	3.32674e+06
World	Overall	2000	2.75681e+06	3.04757e+06	3.33449e+06
World	Overall	2001	2.76535e+06	3.05361e+06	3.32722e+06
World	Overall	2002	2.77526e+06	3.05681e+06	3.33755e+06
World	Overall	2003	2.77751e+06	3.06267e+06	3.35828e+06
World	Overall	2004	2.77538e+06	3.06455e+06	3.36282e+06
World	Overall	2005	2.76105e+06	3.06336e+06	3.37039e+06
World	Overall	2006	2.74596e+06	3.05757e+06	3.35129e+06
World	Overall	2007	2.73491e+06	3.04704e+06	3.35633e+06
World	Overall	2008	2.70784e+06	3.03326e+06	3.34646e+06
World	Overall	2009	2.7009e+06	3.02283e+06	3.34511e+06
World	Overall	2010	2.67472e+06	3.00849e+06	3.33752e+06
World	Overall	2011	2.66058e+06	2.99987e+06	3.34349e+06
World	Overall	2012	2.63489e+06	2.97542e+06	3.33801e+06
World	Overall	2013	2.60725e+06	2.94934e+06	3.31732e+06
World	Overall	2014	2.55893e+06	2.92855e+06	3.31276e+06
World	Overall	2015	2.53884e+06	2.91468e+06	3.30704e+06
World	Overall	2016	2.49736e+06	2.88088e+06	3.30682e+06
World	Overall	2017	2.45186e+06	2.85853e+06	3.28786e+06
World	Overall	2018	2.39622e+06	2.82139e+06	3.30047e+06
World	Overall	2019	2.35591e+06	2.79655e+06	3.28605e+06
World	Overall	2020	2.31493e+06	2.78404e+06	3.30493e+06
World	Overall	2021	2.24839e+06	2.74937e+06	3.30863e+06
World	Overall	2022	2.23093e+06	2.72269e+06	3.33594e+06
World	Overall	2023	2.17077e+06	2.70251e+06	3.3371e+06
World	Overall	2024	2.15659e+06	2.69102e+06	3.36391e+06
World	Overall	2025	2.14269e+06	2.67403e+06	3.40207e+06
World	Overall	2026	2.09075e+06	2.661e+06	3.39135e+06
World	Overall	2027	2.06954e+06	2.6551e+06	3.43447e+06
World	Overall	2028	2.03482e+06	2.65509e+06	3.46817e+06
World	Overall	2029	2.04295e+06	2.65057e+06	3.51277e+06
World	Overall	2030	2.03051e+06	2.65207e+06	3.50722e+06

## Sheet: Fuels (%)
region	area	fuel	year	percent_lower95	percent_median	percent_upper95
Central Asia and Southern Asia	Urban	Biomass	1990	0.23094	0.32995	0.433798
Eastern Asia and South-eastern Asia	Urban	Biomass	1990	0.085057	0.13557	0.321653
Latin America & the Caribbean	Urban	Biomass	1990	0.0353432	0.0687586	0.121791
Northern America and Europe	Urban	Biomass	1990	0.00880619	0.0244989	0.0851005
Oceania excluding Australia and New Zealand	Urban	Biomass	1990	0.0761101	0.366346	0.67345
Sub-Saharan Africa	Urban	Biomass	1990	0.276576	0.36792	0.471355
Western Asia and Northern Africa	Urban	Biomass	1990	0.0407343	0.0716866	0.162446
Central Asia and Southern Asia	Urban	Biomass	1991	0.242645	0.320249	0.415347
Eastern Asia and South-eastern Asia	Urban	Biomass	1991	0.0824499	0.133392	0.298993
Latin America & the Caribbean	Urban	Biomass	1991	0.0342152	0.0637896	0.115597
Northern America and Europe	Urban	Biomass	1991	0.00872241	0.0233893	0.0720313
Oceania excluding Australia and New Zealand	Urban	Biomass	1991	0.0839901	0.355354	0.657724
Sub-Saharan Africa	Urban	Biomass	1991	0.279471	0.366837	0.472863
Western Asia and Northern Africa	Urban	Biomass	1991	0.0408543	0.0703291	0.158633
Central Asia and Southern Asia	Urban	Biomass	1992	0.229923	0.308412	0.395437
Eastern Asia and South-eastern Asia	Urban	Biomass	1992	0.0827867	0.130497	0.285901
Latin America & the Caribbean	Urban	Biomass	1992	0.0331662	0.0603869	0.10582
Northern America and Europe	Urban	Biomass	1992	0.00887357	0.0226229	0.0760707
Oceania excluding Australia and New Zealand	Urban	Biomass	1992	0.079577	0.360205	0.660985
Sub-Saharan Africa	Urban	Biomass	1992	0.28388	0.367597	0.467286
Western Asia and Northern Africa	Urban	Biomass	1992	0.0429189	0.0682748	0.146209
Central Asia and Southern Asia	Urban	Biomass	1993	0.22297	0.299646	0.382852
Eastern Asia and South-eastern Asia	Urban	Biomass	1993	0.0802156	0.127254	0.276339
Latin America & the Caribbean	Urban	Biomass	1993	0.032853	0.0557852	0.100478
Northern America and Europe	Urban	Biomass	1993	0.00884397	0.0220035	0.0682618
Oceania excluding Australia and New Zealand	Urban	Biomass	1993	0.0928086	0.36402	0.65579
Sub-Saharan Africa	Urban	Biomass	1993	0.284691	0.36611	0.458315
Western Asia and Northern Africa	Urban	Biomass	1993	0.0444274	0.0678911	0.136497
Central Asia and Southern Asia	Urban	Biomass	1994	0.214698	0.290999	0.378091
Eastern Asia and South-eastern Asia	Urban	Biomass	1994	0.0798563	0.125967	0.255081
Latin America & the Caribbean	Urban	Biomass	1994	0.0313906	0.0533659	0.0930711
Northern America and Europe	Urban	Biomass	1994	0.00884809	0.0208532	0.0689245
Oceania excluding Australia and New Zealand	Urban	Biomass	1994	0.0967657	0.35536	0.633008
Sub-Saharan Africa	Urban	Biomass	1994	0.289156	0.365014	0.447728
Western Asia and Northern Africa	Urban	Biomass	1994	0.0444755	0.0668777	0.125305
Central Asia and Southern Asia	Urban	Biomass	1995	0.210481	0.281154	0.366151
Eastern Asia and South-eastern Asia	Urban	Biomass	1995	0.0784697	0.122954	0.23221
Latin America & the Caribbean	Urban	Biomass	1995	0.0296281	0.0510015	0.0908524
Northern America and Europe	Urban	Biomass	1995	0.00830155	0.0200707	0.0562263
Oceania excluding Australia and New Zealand	Urban	Biomass	1995	0.092658	0.358458	0.628151
Sub-Saharan Africa	Urban	Biomass	1995	0.289402	0.362607	0.443267
Western Asia and Northern Africa	Urban	Biomass	1995	0.0433581	0.0652721	0.127204
Central Asia and Southern Asia	Urban	Biomass	1996	0.203558	0.276435	0.360934
Eastern Asia and South-eastern Asia	Urban	Biomass	1996	0.0756449	0.124261	0.229399
Latin America & the Caribbean	Urban	Biomass	1996	0.0293645	0.0480646	0.0854873
Northern America and Europe	Urban	Biomass	1996	0.00863526	0.0195822	0.0568909
Oceania excluding Australia and New Zealand	Urban	Biomass	1996	0.0979549	0.358484	0.609007
Sub-Saharan Africa	Urban	Biomass	1996	0.289738	0.359929	0.435852
Western Asia and Northern Africa	Urban	Biomass	1996	0.044413	0.0629726	0.114498
Central Asia and Southern Asia	Urban	Biomass	1997	0.196966	0.270855	0.347928
Eastern Asia and South-eastern Asia	Urban	Biomass	1997	0.0756706	0.122793	0.214566
Latin America & the Caribbean	Urban	Biomass	1997	0.0298984	0.0464567	0.0794392
Northern America and Europe	Urban	Biomass	1997	0.00889022	0.0192798	0.048883
Oceania excluding Australia and New Zealand	Urban	Biomass	1997	0.110094	0.352858	0.609444
Sub-Saharan Africa	Urban	Biomass	1997	0.298082	0.356947	0.42508
Western Asia and Northern Africa	Urban	Biomass	1997	0.0426019	0.0600251	0.103442
Central Asia and Southern Asia	Urban	Biomass	1998	0.1956	0.265441	0.352474
Eastern Asia and South-eastern Asia	Urban	Biomass	1998	0.0749771	0.122932	0.214735
Latin America & the Caribbean	Urban	Biomass	1998	0.0287346	0.0463893	0.0830227
Northern America and Europe	Urban	Biomass	1998	0.00918464	0.0185231	0.0455069
Oceania excluding Australia and New Zealand	Urban	Biomass	1998	0.119561	0.355144	0.597554
Sub-Saharan Africa	Urban	Biomass	1998	0.293518	0.353737	0.418101
Western Asia and Northern Africa	Urban	Biomass	1998	0.0407008	0.0586788	0.0984512
Central Asia and Southern Asia	Urban	Biomass	1999	0.194598	0.260193	0.344029
Eastern Asia and South-eastern Asia	Urban	Biomass	1999	0.073831	0.12052	0.197758
Latin America & the Caribbean	Urban	Biomass	1999	0.0284112	0.0440092	0.0772703
Northern America and Europe	Urban	Biomass	1999	0.00875501	0.0178932	0.0519869
Oceania excluding Australia and New Zealand	Urban	Biomass	1999	0.117355	0.357206	0.594628
Sub-Saharan Africa	Urban	Biomass	1999	0.299453	0.350677	0.411004
Western Asia and Northern Africa	Urban	Biomass	1999	0.0378373	0.0564631	0.0909503
Central Asia and Southern Asia	Urban	Biomass	2000	0.189425	0.258496	0.34802
Eastern Asia and South-eastern Asia	Urban	Biomass	2000	0.0734452	0.120861	0.202685
Latin America & the Caribbean	Urban	Biomass	2000	0.0283878	0.0438938	0.0792824
Northern America and Europe	Urban	Biomass	2000	0.00876898	0.0176597	0.0445139
Oceania excluding Australia and New Zealand	Urban	Biomass	2000	0.128378	0.355067	0.593855
Sub-Saharan Africa	Urban	Biomass	2000	0.298438	0.347441	0.400041
Western Asia and Northern Africa	Urban	Biomass	2000	0.036933	0.0534282	0.0853852
Central Asia and Southern Asia	Urban	Biomass	2001	0.191931	0.258187	0.342969
Eastern Asia and South-eastern Asia	Urban	Biomass	2001	0.0754072	0.121682	0.203494
Latin America & the Caribbean	Urban	Biomass	2001	0.0277135	0.0417231	0.0764043
Northern America and Europe	Urban	Biomass	2001	0.00912769	0.0177037	0.0510855
Oceania excluding Australia and New Zealand	Urban	Biomass	2001	0.138212	0.354174	0.586394
Sub-Saharan Africa	Urban	Biomass	2001	0.301269	0.343743	0.394233
Western Asia and Northern Africa	Urban	Biomass	2001	0.0327178	0.0510783	0.0777626
Central Asia and Southern Asia	Urban	Biomass	2002	0.18732	0.256427	0.341554
Eastern Asia and South-eastern Asia	Urban	Biomass	2002	0.0736305	0.121441	0.194195
Latin America & the Caribbean	Urban	Biomass	2002	0.0263914	0.0403092	0.0752327
Northern America and Europe	Urban	Biomass	2002	0.00936957	0.0175044	0.0567868
Oceania excluding Australia and New Zealand	Urban	Biomass	2002	0.145121	0.359765	0.578654
Sub-Saharan Africa	Urban	Biomass	2002	0.297257	0.339178	0.384487
Western Asia and Northern Africa	Urban	Biomass	2002	0.0300164	0.0490633	0.0693346
Central Asia and Southern Asia	Urban	Biomass	2003	0.189663	0.254007	0.335457
Eastern Asia and South-eastern Asia	Urban	Biomass	2003	0.0706988	0.122722	0.197536
Latin America & the Caribbean	Urban	Biomass	2003	0.026638	0.0411189	0.0698915
Northern America and Europe	Urban	Biomass	2003	0.00958969	0.0177212	0.0695949
Oceania excluding Australia and New Zealand	Urban	Biomass	2003	0.169533	0.361811	0.570976
Sub-Saharan Africa	Urban	Biomass	2003	0.298137	0.33575	0.37474
Western Asia and Northern Africa	Urban	Biomass	2003	0.0266207	0.04568	0.0676811
Central Asia and Southern Asia	Urban	Biomass	2004	0.17717	0.250709	0.324592
Eastern Asia and South-eastern Asia	Urban	Biomass	2004	0.0740759	0.124113	0.19154
Latin America & the Caribbean	Urban	Biomass	2004	0.0261076	0.0396552	0.0651837
Northern America and Europe	Urban	Biomass	2004	0.00934391	0.0181002	0.0709999
Oceania excluding Australia and New Zealand	Urban	Biomass	2004	0.161908	0.369182	0.562573
Sub-Saharan Africa	Urban	Biomass	2004	0.293079	0.330455	0.371384
Western Asia and Northern Africa	Urban	Biomass	2004	0.0229415	0.0420223	0.0615884
Central Asia and Southern Asia	Urban	Biomass	2005	0.181031	0.248469	0.331367
Eastern Asia and South-eastern Asia	Urban	Biomass	2005	0.0785136	0.126831	0.205079
Latin America & the Caribbean	Urban	Biomass	2005	0.0270048	0.0392406	0.0653432
Northern America and Europe	Urban	Biomass	2005	0.0101075	0.0183619	0.0689868
Oceania excluding Australia and New Zealand	Urban	Biomass	2005	0.180038	0.372001	0.543821
Sub-Saharan Africa	Urban	Biomass	2005	0.290238	0.324685	0.361716
Western Asia and Northern Africa	Urban	Biomass	2005	0.018066	0.038468	0.0566944
Central Asia and Southern Asia	Urban	Biomass	2006	0.177587	0.245127	0.320394
Eastern Asia and South-eastern Asia	Urban	Biomass	2006	0.0747332	0.127032	0.203234
Latin America & the Caribbean	Urban	Biomass	2006	0.0262324	0.0390216	0.0655673
Northern America and Europe	Urban	Biomass	2006	0.0101729	0.0190038	0.0824173
Oceania excluding Australia and New Zealand	Urban	Biomass	2006	0.188057	0.372966	0.537875
Sub-Saharan Africa	Urban	Biomass	2006	0.283529	0.321751	0.360232
Western Asia and Northern Africa	Urban	Biomass	2006	0.0158846	0.0343888	0.0540128
Central Asia and Southern Asia	Urban	Biomass	2007	0.165021	0.238718	0.316836
Eastern Asia and South-eastern Asia	Urban	Biomass	2007	0.0732832	0.127333	0.201873
Latin America & the Caribbean	Urban	Biomass	2007	0.0266256	0.0390766	0.0626744
Northern America and Europe	Urban	Biomass	2007	0.0105323	0.0195227	0.084262
Oceania excluding Australia and New Zealand	Urban	Biomass	2007	0.200543	0.37531	0.519848
Sub-Saharan Africa	Urban	Biomass	2007	0.279915	0.315398	0.349898
Western Asia and Northern Africa	Urban	Biomass	2007	0.0118821	0.0303311	0.0477092
Central Asia and Southern Asia	Urban	Biomass	2008	0.165273	0.231629	0.308482
Eastern Asia and South-eastern Asia	Urban	Biomass	2008	0.0684092	0.128514	0.216193
Latin America & the Caribbean	Urban	Biomass	2008	0.0258668	0.037631	0.0605698
Northern America and Europe	Urban	Biomass	2008	0.0111363	0.0217927	0.0963385
Oceania excluding Australia and New Zealand	Urban	Biomass	2008	0.220369	0.383832	0.533342
Sub-Saharan Africa	Urban	Biomass	2008	0.27753	0.309654	0.345156
Western Asia and Northern Africa	Urban	Biomass	2008	0.00858735	0.0255709	0.0474037
Central Asia and Southern Asia	Urban	Biomass	2009	0.162899	0.225899	0.304678
Eastern Asia and South-eastern Asia	Urban	Biomass	2009	0.0734178	0.127318	0.217596
Latin America & the Caribbean	Urban	Biomass	2009	0.0262486	0.0377536	0.0594958
Northern America and Europe	Urban	Biomass	2009	0.0111848	0.0226505	0.121831
Oceania excluding Australia and New Zealand	Urban	Biomass	2009	0.208137	0.383344	0.534959
Sub-Saharan Africa	Urban	Biomass	2009	0.273367	0.30429	0.339532
Western Asia and Northern Africa	Urban	Biomass	2009	0.00705317	0.0215748	0.0422661
Central Asia and Southern Asia	Urban	Biomass	2010	0.153052	0.216962	0.289886
Eastern Asia and South-eastern Asia	Urban	Biomass	2010	0.0667399	0.127785	0.218888
Latin America & the Caribbean	Urban	Biomass	2010	0.0258448	0.0374502	0.059272
Northern America and Europe	Urban	Biomass	2010	0.0111517	0.0253375	0.127805
Oceania excluding Australia and New Zealand	Urban	Biomass	2010	0.223776	0.38737	0.535612
Sub-Saharan Africa	Urban	Biomass	2010	0.267173	0.300835	0.333779
Western Asia and Northern Africa	Urban	Biomass	2010	0.00545118	0.0182684	0.0393822
Central Asia and Southern Asia	Urban	Biomass	2011	0.14745	0.210636	0.287987
Eastern Asia and South-eastern Asia	Urban	Biomass	2011	0.0675003	0.126696	0.219951
Latin America & the Caribbean	Urban	Biomass	2011	0.0257397	0.0373122	0.0606966
Northern America and Europe	Urban	Biomass	2011	0.0115758	0.0277054	0.137878
Oceania excluding Australia and New Zealand	Urban	Biomass	2011	0.218617	0.389213	0.531805
Sub-Saharan Africa	Urban	Biomass	2011	0.263643	0.296134	0.329314
Western Asia and Northern Africa	Urban	Biomass	2011	0.00412979	0.0154822	0.0358276
Central Asia and Southern Asia	Urban	Biomass	2012	0.137506	0.202339	0.288244
Eastern Asia and South-eastern Asia	Urban	Biomass	2012	0.0628049	0.123489	0.224725
Latin America & the Caribbean	Urban	Biomass	2012	0.0251031	0.03762	0.0574626
Northern America and Europe	Urban	Biomass	2012	0.0114123	0.0297501	0.173958
Oceania excluding Australia and New Zealand	Urban	Biomass	2012	0.21313	0.391099	0.564614
Sub-Saharan Africa	Urban	Biomass	2012	0.26068	0.29415	0.327641
Western Asia and Northern Africa	Urban	Biomass	2012	0.00383037	0.0138275	0.0333834
Central Asia and Southern Asia	Urban	Biomass	2013	0.128038	0.191914	0.269164
Eastern Asia and South-eastern Asia	Urban	Biomass	2013	0.0617775	0.12293	0.226344
Latin America & the Caribbean	Urban	Biomass	2013	0.0248783	0.0374767	0.059257
Northern America and Europe	Urban	Biomass	2013	0.0121378	0.0335242	0.192918
Oceania excluding Australia and New Zealand	Urban	Biomass	2013	0.202299	0.395409	0.559879
Sub-Saharan Africa	Urban	Biomass	2013	0.257362	0.291585	0.327708
Western Asia and Northern Africa	Urban	Biomass	2013	0.00347632	0.0115454	0.0320003
Central Asia and Southern Asia	Urban	Biomass	2014	0.120387	0.18039	0.263425
Eastern Asia and South-eastern Asia	Urban	Biomass	2014	0.0536	0.122274	0.239046
Latin America & the Caribbean	Urban	Biomass	2014	0.0249122	0.0377526	0.0601127
Northern America and Europe	Urban	Biomass	2014	0.0122827	0.035749	0.187206
Oceania excluding Australia and New Zealand	Urban	Biomass	2014	0.194694	0.401435	0.573132
Sub-Saharan Africa	Urban	Biomass	2014	0.253145	0.289865	0.324982
Western Asia and Northern Africa	Urban	Biomass	2014	0.00318485	0.0103345	0.0295013
Central Asia and Southern Asia	Urban	Biomass	2015	0.111897	0.17394	0.258844
Eastern Asia and South-eastern Asia	Urban	Biomass	2015	0.0525421	0.117551	0.241588
Latin America & the Caribbean	Urban	Biomass	2015	0.0252328	0.0374016	0.0580198
Northern America and Europe	Urban	Biomass	2015	0.0113535	0.0377256	0.236037
Oceania excluding Australia and New Zealand	Urban	Biomass	2015	0.181234	0.400091	0.599777
Sub-Saharan Africa	Urban	Biomass	2015	0.254899	0.288683	0.323912
Western Asia and Northern Africa	Urban	Biomass	2015	0.00266783	0.00988083	0.0276884
Central Asia and Southern Asia	Urban	Biomass	2016	0.0977724	0.164758	0.260514
Eastern Asia and South-eastern Asia	Urban	Biomass	2016	0.0486169	0.116996	0.278478
Latin America & the Caribbean	Urban	Biomass	2016	0.0253306	0.0381195	0.0583911
Northern America and Europe	Urban	Biomass	2016	0.0123935	0.044451	0.253628
Oceania excluding Australia and New Zealand	Urban	Biomass	2016	0.178387	0.407534	0.604733
Sub-Saharan Africa	Urban	Biomass	2016	0.250569	0.288056	0.327903
Western Asia and Northern Africa	Urban	Biomass	2016	0.00216909	0.00914553	0.0276287
Central Asia and Southern Asia	Urban	Biomass	2017	0.0945518	0.152669	0.254428
Eastern Asia and South-eastern Asia	Urban	Biomass	2017	0.0421007	0.113311	0.286299
Latin America & the Caribbean	Urban	Biomass	2017	0.0237332	0.0380186	0.0589358
Northern America and Europe	Urban	Biomass	2017	0.012586	0.0487605	0.298483
Oceania excluding Australia and New Zealand	Urban	Biomass	2017	0.168807	0.399681	0.62459
Sub-Saharan Africa	Urban	Biomass	2017	0.24946	0.286813	0.330651
Western Asia and Northern Africa	Urban	Biomass	2017	0.00188394	0.00853642	0.0270764
Central Asia and Southern Asia	Urban	Biomass	2018	0.0817676	0.14697	0.259301
Eastern Asia and South-eastern Asia	Urban	Biomass	2018	0.0369405	0.111482	0.309241
Latin America & the Caribbean	Urban	Biomass	2018	0.0248193	0.0387229	0.0608625
Northern America and Europe	Urban	Biomass	2018	0.0116963	0.0487359	0.36167
Oceania excluding Australia and New Zealand	Urban	Biomass	2018	0.154592	0.407669	0.634885
Sub-Saharan Africa	Urban	Biomass	2018	0.245236	0.287207	0.328306
Western Asia and Northern Africa	Urban	Biomass	2018	0.00176829	0.00833557	0.0281287
Central Asia and Southern Asia	Urban	Biomass	2019	0.0732126	0.140122	0.260643
Eastern Asia and South-eastern Asia	Urban	Biomass	2019	0.0327905	0.112169	0.300167
Latin America & the Caribbean	Urban	Biomass	2019	0.0224921	0.0391797	0.0661489
Northern America and Europe	Urban	Biomass	2019	0.0122571	0.0548979	0.37463
Oceania excluding Australia and New Zealand	Urban	Biomass	2019	0.153279	0.405031	0.648648
Sub-Saharan Africa	Urban	Biomass	2019	0.243577	0.286579	0.331561
Western Asia and Northern Africa	Urban	Biomass	2019	0.00141117	0.00811967	0.0290991
Central Asia and Southern Asia	Urban	Biomass	2020	0.0677804	0.132298	0.265333
Eastern Asia and South-eastern Asia	Urban	Biomass	2020	0.0287016	0.107578	0.341454
Latin America & the Caribbean	Urban	Biomass	2020	0.0228697	0.0405865	0.0704321
Northern America and Europe	Urban	Biomass	2020	0.011938	0.0603216	0.430461
Oceania excluding Australia and New Zealand	Urban	Biomass	2020	0.138962	0.409297	0.661169
Sub-Saharan Africa	Urban	Biomass	2020	0.237637	0.284853	0.337991
Western Asia and Northern Africa	Urban	Biomass	2020	0.00160843	0.00824424	0.0297355
Central Asia and Southern Asia	Urban	Biomass	2021	0.0617711	0.128095	0.271544
Eastern Asia and South-eastern Asia	Urban	Biomass	2021	0.0266828	0.105512	0.354118
Latin America & the Caribbean	Urban	Biomass	2021	0.0236347	0.0413135	0.073381
Northern America and Europe	Urban	Biomass	2021	0.0128512	0.0632005	0.449621
Oceania excluding Australia and New Zealand	Urban	Biomass	2021	0.121828	0.409901	0.67945
Sub-Saharan Africa	Urban	Biomass	2021	0.234291	0.284387	0.336504
Western Asia and Northern Africa	Urban	Biomass	2021	0.00178642	0.00820617	0.0322928
Central Asia and Southern Asia	Urban	Biomass	2022	0.0547795	0.120868	0.261547
Eastern Asia and South-eastern Asia	Urban	Biomass	2022	0.0257055	0.0990933	0.379973
Latin America & the Caribbean	Urban	Biomass	2022	0.0220839	0.0416672	0.0742229
Northern America and Europe	Urban	Biomass	2022	0.0132889	0.0672308	0.483042
Oceania excluding Australia and New Zealand	Urban	Biomass	2022	0.12415	0.414892	0.68917
Sub-Saharan Africa	Urban	Biomass	2022	0.230073	0.282821	0.343661
Western Asia and Northern Africa	Urban	Biomass	2022	0.00150764	0.00834913	0.032123
Central Asia and Southern Asia	Urban	Biomass	2023	0.0500962	0.115162	0.265344
Eastern Asia and South-eastern Asia	Urban	Biomass	2023	0.024572	0.0972344	0.399081
Latin America & the Caribbean	Urban	Biomass	2023	0.0220901	0.0438175	0.0806643
Northern America and Europe	Urban	Biomass	2023	0.0121328	0.0710449	0.519811
Oceania excluding Australia and New Zealand	Urban	Biomass	2023	0.114403	0.418689	0.703915
Sub-Saharan Africa	Urban	Biomass	2023	0.224201	0.282696	0.3431
Western Asia and Northern Africa	Urban	Biomass	2023	0.00165036	0.00881601	0.0337716
Central Asia and Southern Asia	Urban	Biomass	2024	0.0456323	0.106373	0.268401
Eastern Asia and South-eastern Asia	Urban	Biomass	2024	0.0211225	0.094283	0.415799
Latin America & the Caribbean	Urban	Biomass	2024	0.020333	0.0449869	0.0878971
Northern America and Europe	Urban	Biomass	2024	0.0120714	0.0776439	0.559965
Oceania excluding Australia and New Zealand	Urban	Biomass	2024	0.107789	0.41509	0.716003
Sub-Saharan Africa	Urban	Biomass	2024	0.218311	0.279979	0.344174
Western Asia and Northern Africa	Urban	Biomass	2024	0.00164746	0.00920723	0.0413867
Central Asia and Southern Asia	Urban	Biomass	2025	0.0421204	0.101681	0.268409
Eastern Asia and South-eastern Asia	Urban	Biomass	2025	0.0197128	0.0918945	0.433355
Latin America & the Caribbean	Urban	Biomass	2025	0.0209205	0.0465348	0.0954095
Northern America and Europe	Urban	Biomass	2025	0.0125018	0.0832098	0.561519
Oceania excluding Australia and New Zealand	Urban	Biomass	2025	0.100061	0.414527	0.733462
Sub-Saharan Africa	Urban	Biomass	2025	0.212348	0.277939	0.344945
Western Asia and Northern Africa	Urban	Biomass	2025	0.00183133	0.00975203	0.0446486
Central Asia and Southern Asia	Urban	Biomass	2026	0.03765	0.0978939	0.272309
Eastern Asia and South-eastern Asia	Urban	Biomass	2026	0.0184449	0.0907561	0.472443
Latin America & the Caribbean	Urban	Biomass	2026	0.0207229	0.0487942	0.102468
Northern America and Europe	Urban	Biomass	2026	0.0126375	0.088503	0.594128
Oceania excluding Australia and New Zealand	Urban	Biomass	2026	0.0974071	0.421102	0.733421
Sub-Saharan Africa	Urban	Biomass	2026	0.207168	0.275423	0.35344
Western Asia and Northern Africa	Urban	Biomass	2026	0.00174299	0.0107665	0.0514598
Central Asia and Southern Asia	Urban	Biomass	2027	0.0334784	0.0938262	0.292993
Eastern Asia and South-eastern Asia	Urban	Biomass	2027	0.0179955	0.0890104	0.462376
Latin America & the Caribbean	Urban	Biomass	2027	0.0208454	0.049377	0.112189
Northern America and Europe	Urban	Biomass	2027	0.0127691	0.0949363	0.62091
Oceania excluding Australia and New Zealand	Urban	Biomass	2027	0.0985185	0.422123	0.756174
Sub-Saharan Africa	Urban	Biomass	2027	0.202541	0.274494	0.349251
Western Asia and Northern Africa	Urban	Biomass	2027	0.00141741	0.0108898	0.0534604
Central Asia and Southern Asia	Urban	Biomass	2028	0.0312604	0.0890507	0.28876
Eastern Asia and South-eastern Asia	Urban	Biomass	2028	0.0161144	0.0868715	0.484837
Latin America & the Caribbean	Urban	Biomass	2028	0.019777	0.0512605	0.121151
Northern America and Europe	Urban	Biomass	2028	0.0128461	0.0951641	0.635456
Oceania excluding Australia and New Zealand	Urban	Biomass	2028	0.0899286	0.426095	0.751646
Sub-Saharan Africa	Urban	Biomass	2028	0.194392	0.271519	0.35373
Western Asia and Northern Africa	Urban	Biomass	2028	0.00144108	0.0117006	0.0575882
Central Asia and Southern Asia	Urban	Biomass	2029	0.0316168	0.0880585	0.281335
Eastern Asia and South-eastern Asia	Urban	Biomass	2029	0.015034	0.0848876	0.520078
Latin America & the Caribbean	Urban	Biomass	2029	0.0210703	0.054495	0.130982
Northern America and Europe	Urban	Biomass	2029	0.013042	0.103427	0.637586
Oceania excluding Australia and New Zealand	Urban	Biomass	2029	0.084347	0.431981	0.778601
Sub-Saharan Africa	Urban	Biomass	2029	0.187453	0.268074	0.352088
Western Asia and Northern Africa	Urban	Biomass	2029	0.00182097	0.0125799	0.0674452
Central Asia and Southern Asia	Urban	Biomass	2030	0.0263753	0.0839415	0.298497
Eastern Asia and South-eastern Asia	Urban	Biomass	2030	0.0143075	0.0831499	0.535254
Latin America & the Caribbean	Urban	Biomass	2030	0.0206078	0.0552856	0.140214
Northern America and Europe	Urban	Biomass	2030	0.0125177	0.100938	0.647002
Oceania excluding Australia and New Zealand	Urban	Biomass	2030	0.0788593	0.418802	0.787775
Sub-Saharan Africa	Urban	Biomass	2030	0.183228	0.266251	0.35918
Western Asia and Northern Africa	Urban	Biomass	2030	0.0016267	0.0132936	0.0769726
Central Asia and Southern Asia	Urban	Charcoal	1990	0.000263176	0.00296473	0.0366737
Eastern Asia and South-eastern Asia	Urban	Charcoal	1990	0.0140464	0.0277992	0.0431204
Latin America & the Caribbean	Urban	Charcoal	1990	0.00322496	0.00707316	0.0188517
Northern America and Europe	Urban	Charcoal	1990	1.58132e-05	0.000504332	0.0199665
Oceania excluding Australia and New Zealand	Urban	Charcoal	1990	1.41331e-05	0.000667191	0.0128147
Sub-Saharan Africa	Urban	Charcoal	1990	0.134965	0.17637	0.232014
Western Asia and Northern Africa	Urban	Charcoal	1990	7.3939e-05	0.00191799	0.0149973
Central Asia and Southern Asia	Urban	Charcoal	1991	0.000336816	0.00280627	0.0317544
Eastern Asia and South-eastern Asia	Urban	Charcoal	1991	0.014595	0.0275939	0.0412524
Latin America & the Caribbean	Urban	Charcoal	1991	0.003553	0.00715397	0.0158782
Northern America and Europe	Urban	Charcoal	1991	1.30622e-05	0.000503775	0.0149406
Oceania excluding Australia and New Zealand	Urban	Charcoal	1991	1.03159e-05	0.000646309	0.0102228
Sub-Saharan Africa	Urban	Charcoal	1991	0.135493	0.178274	0.230185
Western Asia and Northern Africa	Urban	Charcoal	1991	8.64873e-05	0.00162379	0.015581
Central Asia and Southern Asia	Urban	Charcoal	1992	0.000323894	0.00280497	0.033422
Eastern Asia and South-eastern Asia	Urban	Charcoal	1992	0.0142157	0.0266878	0.0411367
Latin America & the Caribbean	Urban	Charcoal	1992	0.00364753	0.00726847	0.0148063
Northern America and Europe	Urban	Charcoal	1992	1.3014e-05	0.000451511	0.0126956
Oceania excluding Australia and New Zealand	Urban	Charcoal	1992	1.10047e-05	0.000626368	0.0121157
Sub-Saharan Africa	Urban	Charcoal	1992	0.13912	0.180458	0.23048
Western Asia and Northern Africa	Urban	Charcoal	1992	8.02891e-05	0.00143786	0.0135437
Central Asia and Southern Asia	Urban	Charcoal	1993	0.000279974	0.00242596	0.0240247
Eastern Asia and South-eastern Asia	Urban	Charcoal	1993	0.0136651	0.0261742	0.0392601
Latin America & the Caribbean	Urban	Charcoal	1993	0.00391157	0.00725649	0.0140324
Northern America and Europe	Urban	Charcoal	1993	1.36355e-05	0.00042362	0.0145372
Oceania excluding Australia and New Zealand	Urban	Charcoal	1993	1.39704e-05	0.000572953	0.0104777
Sub-Saharan Africa	Urban	Charcoal	1993	0.143758	0.181376	0.231533
Western Asia and Northern Africa	Urban	Charcoal	1993	7.07238e-05	0.00120846	0.0118574
Central Asia and Southern Asia	Urban	Charcoal	1994	0.000304803	0.00237354	0.018444
Eastern Asia and South-eastern Asia	Urban	Charcoal	1994	0.013817	0.0258426	0.0380766
Latin America & the Caribbean	Urban	Charcoal	1994	0.00411213	0.00733869	0.0140515
Northern America and Europe	Urban	Charcoal	1994	1.61612e-05	0.00038473	0.0141905
Oceania excluding Australia and New Zealand	Urban	Charcoal	1994	1.39313e-05	0.000507984	0.0131397
Sub-Saharan Africa	Urban	Charcoal	1994	0.145866	0.184453	0.230888
Western Asia and Northern Africa	Urban	Charcoal	1994	6.82468e-05	0.0011099	0.0130246
Central Asia and Southern Asia	Urban	Charcoal	1995	0.000270874	0.00223284	0.0196748
Eastern Asia and South-eastern Asia	Urban	Charcoal	1995	0.0144349	0.0248361	0.0361784
Latin America & the Caribbean	Urban	Charcoal	1995	0.00443433	0.00747666	0.014413
Northern America and Europe	Urban	Charcoal	1995	1.52684e-05	0.000369869	0.01041
Oceania excluding Australia and New Zealand	Urban	Charcoal	1995	1.16291e-05	0.000475357	0.0103629
Sub-Saharan Africa	Urban	Charcoal	1995	0.149416	0.188479	0.232469
Western Asia and Northern Africa	Urban	Charcoal	1995	8.07515e-05	0.000929048	0.0130911
Central Asia and Southern Asia	Urban	Charcoal	1996	0.000325009	0.00200222	0.014319
Eastern Asia and South-eastern Asia	Urban	Charcoal	1996	0.0137902	0.024523	0.0351224
Latin America & the Caribbean	Urban	Charcoal	1996	0.00467427	0.00775573	0.0134128
Northern America and Europe	Urban	Charcoal	1996	1.56175e-05	0.000291624	0.00857713
Oceania excluding Australia and New Zealand	Urban	Charcoal	1996	1.72145e-05	0.000522611	0.00760241
Sub-Saharan Africa	Urban	Charcoal	1996	0.155904	0.192802	0.235224
Western Asia and Northern Africa	Urban	Charcoal	1996	6.48497e-05	0.000817266	0.0117007
Central Asia and Southern Asia	Urban	Charcoal	1997	0.000294096	0.00183275	0.0189162
Eastern Asia and South-eastern Asia	Urban	Charcoal	1997	0.0128536	0.0235275	0.0337717
Latin America & the Caribbean	Urban	Charcoal	1997	0.00519023	0.00790892	0.0142308
Northern America and Europe	Urban	Charcoal	1997	1.8245e-05	0.000297437	0.00823399
Oceania excluding Australia and New Zealand	Urban	Charcoal	1997	1.50002e-05	0.000524219	0.00856362
Sub-Saharan Africa	Urban	Charcoal	1997	0.162403	0.19689	0.23556
Western Asia and Northern Africa	Urban	Charcoal	1997	5.63047e-05	0.000777258	0.0124527
Central Asia and Southern Asia	Urban	Charcoal	1998	0.000337438	0.00179992	0.0134418
Eastern Asia and South-eastern Asia	Urban	Charcoal	1998	0.0139852	0.0226885	0.0328445
Latin America & the Caribbean	Urban	Charcoal	1998	0.00523939	0.00810284	0.0131352
Northern America and Europe	Urban	Charcoal	1998	2.01071e-05	0.000257563	0.00700121
Oceania excluding Australia and New Zealand	Urban	Charcoal	1998	1.4067e-05	0.000522429	0.00891785
Sub-Saharan Africa	Urban	Charcoal	1998	0.170102	0.202087	0.239351
Western Asia and Northern Africa	Urban	Charcoal	1998	4.55236e-05	0.000661628	0.0134945
Central Asia and Southern Asia	Urban	Charcoal	1999	0.000268902	0.00162563	0.0123679
Eastern Asia and South-eastern Asia	Urban	Charcoal	1999	0.013791	0.0218993	0.0314968
Latin America & the Caribbean	Urban	Charcoal	1999	0.00547245	0.00835883	0.0143474
Northern America and Europe	Urban	Charcoal	1999	2.11413e-05	0.000243392	0.00689688
Oceania excluding Australia and New Zealand	Urban	Charcoal	1999	1.53669e-05	0.000503266	0.0096769
Sub-Saharan Africa	Urban	Charcoal	1999	0.177824	0.20726	0.243119
Western Asia and Northern Africa	Urban	Charcoal	1999	4.74766e-05	0.000668759	0.013091
Central Asia and Southern Asia	Urban	Charcoal	2000	0.000257294	0.00156242	0.0147223
Eastern Asia and South-eastern Asia	Urban	Charcoal	2000	0.0135842	0.0213806	0.0304867
Latin America & the Caribbean	Urban	Charcoal	2000	0.00608776	0.00871122	0.0151892
Northern America and Europe	Urban	Charcoal	2000	1.87083e-05	0.000224253	0.00663059
Oceania excluding Australia and New Zealand	Urban	Charcoal	2000	1.95694e-05	0.000530319	0.00900836
Sub-Saharan Africa	Urban	Charcoal	2000	0.183374	0.212859	0.246647
Western Asia and Northern Africa	Urban	Charcoal	2000	5.41779e-05	0.000795294	0.0120442
Central Asia and Southern Asia	Urban	Charcoal	2001	0.000291066	0.00136292	0.012844
Eastern Asia and South-eastern Asia	Urban	Charcoal	2001	0.0137112	0.0208602	0.0290515
Latin America & the Caribbean	Urban	Charcoal	2001	0.00630913	0.00928998	0.0161302
Northern America and Europe	Urban	Charcoal	2001	2.09527e-05	0.000197181	0.00558931
Oceania excluding Australia and New Zealand	Urban	Charcoal	2001	1.51804e-05	0.000561976	0.00860763
Sub-Saharan Africa	Urban	Charcoal	2001	0.192649	0.219274	0.248591
Western Asia and Northern Africa	Urban	Charcoal	2001	3.78802e-05	0.00107747	0.0177724
Central Asia and Southern Asia	Urban	Charcoal	2002	0.000241911	0.0012856	0.0105235
Eastern Asia and South-eastern Asia	Urban	Charcoal	2002	0.0139803	0.020232	0.0296656
Latin America & the Caribbean	Urban	Charcoal	2002	0.00663576	0.0099179	0.0165547
Northern America and Europe	Urban	Charcoal	2002	2.69844e-05	0.000200016	0.00489017
Oceania excluding Australia and New Zealand	Urban	Charcoal	2002	1.54215e-05	0.000653187	0.00876247
Sub-Saharan Africa	Urban	Charcoal	2002	0.197622	0.225114	0.253805
Western Asia and Northern Africa	Urban	Charcoal	2002	5.56476e-05	0.00136257	0.016043
Central Asia and Southern Asia	Urban	Charcoal	2003	0.000240052	0.00113937	0.0104079
Eastern Asia and South-eastern Asia	Urban	Charcoal	2003	0.0135193	0.0198397	0.027606
Latin America & the Caribbean	Urban	Charcoal	2003	0.00746389	0.0107365	0.0191292
Northern America and Europe	Urban	Charcoal	2003	3.06615e-05	0.000204157	0.00482705
Oceania excluding Australia and New Zealand	Urban	Charcoal	2003	2.669e-05	0.000716529	0.00721858
Sub-Saharan Africa	Urban	Charcoal	2003	0.20357	0.230947	0.259449
Western Asia and Northern Africa	Urban	Charcoal	2003	6.4108e-05	0.00233174	0.0214319
Central Asia and Southern Asia	Urban	Charcoal	2004	0.000255751	0.00110739	0.0107501
Eastern Asia and South-eastern Asia	Urban	Charcoal	2004	0.0135434	0.0195798	0.0266817
Latin America & the Caribbean	Urban	Charcoal	2004	0.00788544	0.010968	0.0184532
Northern America and Europe	Urban	Charcoal	2004	2.83316e-05	0.000182359	0.00341119
Oceania excluding Australia and New Zealand	Urban	Charcoal	2004	2.97131e-05	0.000712821	0.00712304
Sub-Saharan Africa	Urban	Charcoal	2004	0.210846	0.236266	0.264234
Western Asia and Northern Africa	Urban	Charcoal	2004	8.33866e-05	0.00319397	0.0224511
Central Asia and Southern Asia	Urban	Charcoal	2005	0.000190738	0.000922673	0.00914927
Eastern Asia and South-eastern Asia	Urban	Charcoal	2005	0.0140802	0.0193469	0.0266399
Latin America & the Caribbean	Urban	Charcoal	2005	0.00820911	0.0115111	0.0201386
Northern America and Europe	Urban	Charcoal	2005	2.87499e-05	0.000187106	0.002827
Oceania excluding Australia and New Zealand	Urban	Charcoal	2005	3.04272e-05	0.000916432	0.00948812
Sub-Saharan Africa	Urban	Charcoal	2005	0.217695	0.24246	0.266838
Western Asia and Northern Africa	Urban	Charcoal	2005	0.000121146	0.00509231	0.0233574
Central Asia and Southern Asia	Urban	Charcoal	2006	0.000170452	0.000830185	0.0122772
Eastern Asia and South-eastern Asia	Urban	Charcoal	2006	0.0133672	0.0192685	0.0266402
Latin America & the Caribbean	Urban	Charcoal	2006	0.00853841	0.0119863	0.0200322
Northern America and Europe	Urban	Charcoal	2006	3.32318e-05	0.000172911	0.00352266
Oceania excluding Australia and New Zealand	Urban	Charcoal	2006	4.16515e-05	0.00110588	0.00886175
Sub-Saharan Africa	Urban	Charcoal	2006	0.222181	0.247436	0.271466
Western Asia and Northern Africa	Urban	Charcoal	2006	0.000186361	0.00660375	0.0242446
Central Asia and Southern Asia	Urban	Charcoal	2007	0.000161039	0.000709209	0.00915774
Eastern Asia and South-eastern Asia	Urban	Charcoal	2007	0.0136622	0.0188428	0.0251312
Latin America & the Caribbean	Urban	Charcoal	2007	0.00875686	0.0124019	0.0209963
Northern America and Europe	Urban	Charcoal	2007	3.25254e-05	0.000168895	0.00307343
Oceania excluding Australia and New Zealand	Urban	Charcoal	2007	4.01788e-05	0.00134293	0.00971062
Sub-Saharan Africa	Urban	Charcoal	2007	0.23043	0.252771	0.277744
Western Asia and Northern Africa	Urban	Charcoal	2007	0.000263597	0.00984228	0.0269368
Central Asia and Southern Asia	Urban	Charcoal	2008	0.000132988	0.000723311	0.011474
Eastern Asia and South-eastern Asia	Urban	Charcoal	2008	0.0132598	0.0186335	0.025535
Latin America & the Caribbean	Urban	Charcoal	2008	0.00871612	0.0126363	0.022551
Northern America and Europe	Urban	Charcoal	2008	3.07875e-05	0.000172936	0.00224969
Oceania excluding Australia and New Zealand	Urban	Charcoal	2008	3.27556e-05	0.00161121	0.00985394
Sub-Saharan Africa	Urban	Charcoal	2008	0.233945	0.2587	0.283695
Western Asia and Northern Africa	Urban	Charcoal	2008	0.000536988	0.0115408	0.0278682
Central Asia and Southern Asia	Urban	Charcoal	2009	0.000122652	0.000645548	0.0109635
Eastern Asia and South-eastern Asia	Urban	Charcoal	2009	0.0126789	0.0182025	0.0251401
Latin America & the Caribbean	Urban	Charcoal	2009	0.00943706	0.0128233	0.0214554
Northern America and Europe	Urban	Charcoal	2009	3.57166e-05	0.000163769	0.00197267
Oceania excluding Australia and New Zealand	Urban	Charcoal	2009	4.66835e-05	0.00198821	0.011365
Sub-Saharan Africa	Urban	Charcoal	2009	0.241243	0.263766	0.287361
Western Asia and Northern Africa	Urban	Charcoal	2009	0.000865451	0.0130707	0.0285899
Central Asia and Southern Asia	Urban	Charcoal	2010	0.000100008	0.00062252	0.00998423
Eastern Asia and South-eastern Asia	Urban	Charcoal	2010	0.0123386	0.0177423	0.0238933
Latin America & the Caribbean	Urban	Charcoal	2010	0.00961589	0.0131514	0.0213942
Northern America and Europe	Urban	Charcoal	2010	3.41535e-05	0.000168768	0.00187455
Oceania excluding Australia and New Zealand	Urban	Charcoal	2010	7.29936e-05	0.00258463	0.0115331
Sub-Saharan Africa	Urban	Charcoal	2010	0.24523	0.268283	0.293591
Western Asia and Northern Africa	Urban	Charcoal	2010	0.00110095	0.0148931	0.0294142
Central Asia and Southern Asia	Urban	Charcoal	2011	9.2015e-05	0.000629464	0.0114116
Eastern Asia and South-eastern Asia	Urban	Charcoal	2011	0.0117666	0.0171458	0.0233595
Latin America & the Caribbean	Urban	Charcoal	2011	0.00991353	0.0134622	0.022369
Northern America and Europe	Urban	Charcoal	2011	3.58585e-05	0.000168222	0.00155378
Oceania excluding Australia and New Zealand	Urban	Charcoal	2011	5.75468e-05	0.00308252	0.0134974
Sub-Saharan Africa	Urban	Charcoal	2011	0.250158	0.27297	0.298653
Western Asia and Northern Africa	Urban	Charcoal	2011	0.00179085	0.0158418	0.0308414
Central Asia and Southern Asia	Urban	Charcoal	2012	7.62462e-05	0.000705172	0.0122803
Eastern Asia and South-eastern Asia	Urban	Charcoal	2012	0.011346	0.0164937	0.0231634
Latin America & the Caribbean	Urban	Charcoal	2012	0.00989302	0.0135494	0.0221898
Northern America and Europe	Urban	Charcoal	2012	3.80963e-05	0.000179338	0.00178003
Oceania excluding Australia and New Zealand	Urban	Charcoal	2012	0.000107017	0.00391552	0.014894
Sub-Saharan Africa	Urban	Charcoal	2012	0.252796	0.277324	0.303157
Western Asia and Northern Africa	Urban	Charcoal	2012	0.0019476	0.0165618	0.0301731
Central Asia and Southern Asia	Urban	Charcoal	2013	6.16701e-05	0.000766025	0.0116331
Eastern Asia and South-eastern Asia	Urban	Charcoal	2013	0.0105996	0.0155923	0.0216628
Latin America & the Caribbean	Urban	Charcoal	2013	0.00987265	0.013606	0.0223398
Northern America and Europe	Urban	Charcoal	2013	3.60387e-05	0.000171557	0.00177332
Oceania excluding Australia and New Zealand	Urban	Charcoal	2013	9.47479e-05	0.00477276	0.0176212
Sub-Saharan Africa	Urban	Charcoal	2013	0.255326	0.280217	0.307927
Western Asia and Northern Africa	Urban	Charcoal	2013	0.00259724	0.0170645	0.0300242
Central Asia and Southern Asia	Urban	Charcoal	2014	6.04367e-05	0.000810301	0.013037
Eastern Asia and South-eastern Asia	Urban	Charcoal	2014	0.00942492	0.0146011	0.0207537
Latin America & the Caribbean	Urban	Charcoal	2014	0.00947039	0.0136537	0.023643
Northern America and Europe	Urban	Charcoal	2014	3.52157e-05	0.000168819	0.00138112
Oceania excluding Australia and New Zealand	Urban	Charcoal	2014	0.000113223	0.00571666	0.0198993
Sub-Saharan Africa	Urban	Charcoal	2014	0.257118	0.283845	0.312455
Western Asia and Northern Africa	Urban	Charcoal	2014	0.0034529	0.0169411	0.0311846
Central Asia and Southern Asia	Urban	Charcoal	2015	5.49978e-05	0.00104404	0.0146817
Eastern Asia and South-eastern Asia	Urban	Charcoal	2015	0.00892262	0.0136064	0.0198395
Latin America & the Caribbean	Urban	Charcoal	2015	0.0097439	0.013776	0.0236034
Northern America and Europe	Urban	Charcoal	2015	2.99277e-05	0.000172237	0.00194849
Oceania excluding Australia and New Zealand	Urban	Charcoal	2015	0.000180662	0.00638501	0.0199642
Sub-Saharan Africa	Urban	Charcoal	2015	0.258753	0.287222	0.318443
Western Asia and Northern Africa	Urban	Charcoal	2015	0.00337235	0.0170107	0.0307817
Central Asia and Southern Asia	Urban	Charcoal	2016	4.57755e-05	0.000981694	0.0139325
Eastern Asia and South-eastern Asia	Urban	Charcoal	2016	0.00813735	0.0124335	0.0184198
Latin America & the Caribbean	Urban	Charcoal	2016	0.0096118	0.0140745	0.0238473
Northern America and Europe	Urban	Charcoal	2016	3.10053e-05	0.000183113	0.00173481
Oceania excluding Australia and New Zealand	Urban	Charcoal	2016	0.00010756	0.00707786	0.0240117
Sub-Saharan Africa	Urban	Charcoal	2016	0.25878	0.289386	0.320277
Western Asia and Northern Africa	Urban	Charcoal	2016	0.00358986	0.0173295	0.0317307
Central Asia and Southern Asia	Urban	Charcoal	2017	5.38533e-05	0.00130056	0.0146784
Eastern Asia and South-eastern Asia	Urban	Charcoal	2017	0.00705254	0.0116234	0.0177251
Latin America & the Caribbean	Urban	Charcoal	2017	0.00958589	0.0140014	0.0251104
Northern America and Europe	Urban	Charcoal	2017	2.88551e-05	0.00018207	0.00177744
Oceania excluding Australia and New Zealand	Urban	Charcoal	2017	8.43401e-05	0.00829309	0.028452
Sub-Saharan Africa	Urban	Charcoal	2017	0.258453	0.291595	0.328067
Western Asia and Northern Africa	Urban	Charcoal	2017	0.00398695	0.0171356	0.0323284
Central Asia and Southern Asia	Urban	Charcoal	2018	5.64416e-05	0.00157791	0.0165642
Eastern Asia and South-eastern Asia	Urban	Charcoal	2018	0.00617956	0.0106575	0.0175634
Latin America & the Caribbean	Urban	Charcoal	2018	0.00975943	0.0139362	0.0248767
Northern America and Europe	Urban	Charcoal	2018	2.18623e-05	0.000190274	0.00194115
Oceania excluding Australia and New Zealand	Urban	Charcoal	2018	0.000136316	0.00921954	0.0297231
Sub-Saharan Africa	Urban	Charcoal	2018	0.257137	0.293246	0.332038
Western Asia and Northern Africa	Urban	Charcoal	2018	0.00363112	0.0167861	0.0342926
Central Asia and Southern Asia	Urban	Charcoal	2019	4.59053e-05	0.00167038	0.016641
Eastern Asia and South-eastern Asia	Urban	Charcoal	2019	0.00551533	0.00996538	0.0169588
Latin America & the Caribbean	Urban	Charcoal	2019	0.00916307	0.0141388	0.0255202
Northern America and Europe	Urban	Charcoal	2019	2.16877e-05	0.000198845	0.0022824
Oceania excluding Australia and New Zealand	Urban	Charcoal	2019	0.000143143	0.0104843	0.0356052
Sub-Saharan Africa	Urban	Charcoal	2019	0.256345	0.294551	0.337708
Western Asia and Northern Africa	Urban	Charcoal	2019	0.00340619	0.0164516	0.035111
Central Asia and Southern Asia	Urban	Charcoal	2020	6.01434e-05	0.00181943	0.0180993
Eastern Asia and South-eastern Asia	Urban	Charcoal	2020	0.00499468	0.00937389	0.0161198
Latin America & the Caribbean	Urban	Charcoal	2020	0.00888584	0.0143462	0.0300574
Northern America and Europe	Urban	Charcoal	2020	1.77571e-05	0.000192968	0.00324784
Oceania excluding Australia and New Zealand	Urban	Charcoal	2020	0.000181468	0.0120368	0.0357687
Sub-Saharan Africa	Urban	Charcoal	2020	0.251977	0.297022	0.344303
Western Asia and Northern Africa	Urban	Charcoal	2020	0.00328068	0.0161093	0.0357619
Central Asia and Southern Asia	Urban	Charcoal	2021	4.45863e-05	0.00201194	0.0221846
Eastern Asia and South-eastern Asia	Urban	Charcoal	2021	0.00438108	0.00885181	0.016586
Latin America & the Caribbean	Urban	Charcoal	2021	0.00893834	0.0143719	0.0306425
Northern America and Europe	Urban	Charcoal	2021	1.99989e-05	0.000234264	0.00370055
Oceania excluding Australia and New Zealand	Urban	Charcoal	2021	0.000179242	0.0132047	0.0403734
Sub-Saharan Africa	Urban	Charcoal	2021	0.251942	0.297477	0.350042
Western Asia and Northern Africa	Urban	Charcoal	2021	0.00269318	0.0161239	0.0400205
Central Asia and Southern Asia	Urban	Charcoal	2022	4.38262e-05	0.00223975	0.0245092
Eastern Asia and South-eastern Asia	Urban	Charcoal	2022	0.00392833	0.00821061	0.0162204
Latin America & the Caribbean	Urban	Charcoal	2022	0.00836962	0.0146451	0.0307717
Northern America and Europe	Urban	Charcoal	2022	1.36321e-05	0.000224904	0.00418835
Oceania excluding Australia and New Zealand	Urban	Charcoal	2022	0.000172282	0.0139142	0.0420108
Sub-Saharan Africa	Urban	Charcoal	2022	0.24611	0.300053	0.358244
Western Asia and Northern Africa	Urban	Charcoal	2022	0.0023511	0.0149921	0.0411602
Central Asia and Southern Asia	Urban	Charcoal	2023	5.6798e-05	0.0024185	0.0286318
Eastern Asia and South-eastern Asia	Urban	Charcoal	2023	0.00343396	0.00776176	0.016615
Latin America & the Caribbean	Urban	Charcoal	2023	0.00822165	0.0148558	0.0332189
Northern America and Europe	Urban	Charcoal	2023	1.1688e-05	0.000248412	0.00431281
Oceania excluding Australia and New Zealand	Urban	Charcoal	2023	0.000130579	0.0156459	0.0515523
Sub-Saharan Africa	Urban	Charcoal	2023	0.243974	0.300867	0.366128
Western Asia and Northern Africa	Urban	Charcoal	2023	0.00217369	0.0151871	0.0421468
Central Asia and Southern Asia	Urban	Charcoal	2024	4.92283e-05	0.00249677	0.0282406
Eastern Asia and South-eastern Asia	Urban	Charcoal	2024	0.00316159	0.00743875	0.0166368
Latin America & the Caribbean	Urban	Charcoal	2024	0.00760495	0.0150442	0.0349171
Northern America and Europe	Urban	Charcoal	2024	1.94681e-05	0.000272697	0.00754575
Oceania excluding Australia and New Zealand	Urban	Charcoal	2024	0.000198541	0.0170455	0.0508485
Sub-Saharan Africa	Urban	Charcoal	2024	0.238369	0.299435	0.370647
Western Asia and Northern Africa	Urban	Charcoal	2024	0.00188957	0.0147118	0.045453
Central Asia and Southern Asia	Urban	Charcoal	2025	3.09632e-05	0.00288178	0.0281314
Eastern Asia and South-eastern Asia	Urban	Charcoal	2025	0.00290855	0.00734967	0.017068
Latin America & the Caribbean	Urban	Charcoal	2025	0.00757478	0.0151673	0.0411147
Northern America and Europe	Urban	Charcoal	2025	1.23321e-05	0.000293184	0.00766355
Oceania excluding Australia and New Zealand	Urban	Charcoal	2025	0.000185435	0.018309	0.0596628
Sub-Saharan Africa	Urban	Charcoal	2025	0.237199	0.301027	0.381997
Western Asia and Northern Africa	Urban	Charcoal	2025	0.00187547	0.0146279	0.0469132
Central Asia and Southern Asia	Urban	Charcoal	2026	6.91413e-05	0.00303253	0.0333308
Eastern Asia and South-eastern Asia	Urban	Charcoal	2026	0.00246368	0.00707367	0.017624
Latin America & the Caribbean	Urban	Charcoal	2026	0.00743307	0.0153927	0.0450295
Northern America and Europe	Urban	Charcoal	2026	1.29506e-05	0.000290623	0.00676372
Oceania excluding Australia and New Zealand	Urban	Charcoal	2026	0.000244558	0.0188373	0.0615764
Sub-Saharan Africa	Urban	Charcoal	2026	0.232973	0.303249	0.384257
Western Asia and Northern Africa	Urban	Charcoal	2026	0.00146769	0.0137622	0.0491073
Central Asia and Southern Asia	Urban	Charcoal	2027	7.69339e-05	0.00283217	0.0357755
Eastern Asia and South-eastern Asia	Urban	Charcoal	2027	0.00235901	0.00677192	0.0175447
Latin America & the Caribbean	Urban	Charcoal	2027	0.00703504	0.0154117	0.0470178
Northern America and Europe	Urban	Charcoal	2027	9.86759e-06	0.000321517	0.00739169
Oceania excluding Australia and New Zealand	Urban	Charcoal	2027	0.000182105	0.0208607	0.0682919
Sub-Saharan Africa	Urban	Charcoal	2027	0.227878	0.303073	0.393198
Western Asia and Northern Africa	Urban	Charcoal	2027	0.00116727	0.0135506	0.0518332
Central Asia and Southern Asia	Urban	Charcoal	2028	6.20093e-05	0.00326077	0.0352687
Eastern Asia and South-eastern Asia	Urban	Charcoal	2028	0.00203104	0.00649295	0.0191271
Latin America & the Caribbean	Urban	Charcoal	2028	0.00614319	0.0159748	0.0470052
Northern America and Europe	Urban	Charcoal	2028	1.22714e-05	0.000344774	0.0133803
Oceania excluding Australia and New Zealand	Urban	Charcoal	2028	0.000230181	0.0226255	0.0747686
Sub-Saharan Africa	Urban	Charcoal	2028	0.224528	0.301642	0.401613
Western Asia and Northern Africa	Urban	Charcoal	2028	0.000992021	0.0137968	0.0542056
Central Asia and Southern Asia	Urban	Charcoal	2029	6.87895e-05	0.00342004	0.0414318
Eastern Asia and South-eastern Asia	Urban	Charcoal	2029	0.00187427	0.00647728	0.0198903
Latin America & the Caribbean	Urban	Charcoal	2029	0.00594392	0.0158586	0.0537443
Northern America and Europe	Urban	Charcoal	2029	1.1276e-05	0.000375598	0.0147981
Oceania excluding Australia and New Zealand	Urban	Charcoal	2029	0.000126767	0.0229216	0.0780567
Sub-Saharan Africa	Urban	Charcoal	2029	0.219093	0.299573	0.402943
Western Asia and Northern Africa	Urban	Charcoal	2029	0.0010742	0.0133086	0.0553047
Central Asia and Southern Asia	Urban	Charcoal	2030	8.38449e-05	0.00344195	0.0420925
Eastern Asia and South-eastern Asia	Urban	Charcoal	2030	0.00192944	0.00623989	0.0199052
Latin America & the Caribbean	Urban	Charcoal	2030	0.00583816	0.0162114	0.0635203
Northern America and Europe	Urban	Charcoal	2030	9.02961e-06	0.000440661	0.0158461
Oceania excluding Australia and New Zealand	Urban	Charcoal	2030	0.000115805	0.02388	0.0798196
Sub-Saharan Africa	Urban	Charcoal	2030	0.216726	0.302688	0.41215
Western Asia and Northern Africa	Urban	Charcoal	2030	0.000810729	0.0134459	0.0589675
Central Asia and Southern Asia	Urban	Coal	1990	0.0311803	0.0684159	0.112709
Eastern Asia and South-eastern Asia	Urban	Coal	1990	0.0285872	0.178957	0.481363
Latin America & the Caribbean	Urban	Coal	1990	0.00057615	0.00361868	0.00629446
Northern America and Europe	Urban	Coal	1990	0.000746211	0.0113853	0.0822389
Oceania excluding Australia and New Zealand	Urban	Coal	1990	2.62777e-06	0.000248622	0.00826429
Sub-Saharan Africa	Urban	Coal	1990	0.00454485	0.0144286	0.0402687
Western Asia and Northern Africa	Urban	Coal	1990	1.57884e-05	0.00143741	0.056623
Central Asia and Southern Asia	Urban	Coal	1991	0.0306792	0.0631582	0.104207
Eastern Asia and South-eastern Asia	Urban	Coal	1991	0.0355944	0.186017	0.472929
Latin America & the Caribbean	Urban	Coal	1991	0.000699735	0.00298816	0.00568807
Northern America and Europe	Urban	Coal	1991	0.000931039	0.0117825	0.0710557
Oceania excluding Australia and New Zealand	Urban	Coal	1991	1.44913e-06	0.000223906	0.00697746
Sub-Saharan Africa	Urban	Coal	1991	0.00411519	0.0136214	0.0390104
Western Asia and Northern Africa	Urban	Coal	1991	1.50396e-05	0.00150972	0.0475271
Central Asia and Southern Asia	Urban	Coal	1992	0.0266669	0.0555978	0.0941332
Eastern Asia and South-eastern Asia	Urban	Coal	1992	0.0411786	0.184849	0.437971
Latin America & the Caribbean	Urban	Coal	1992	0.000600933	0.0025129	0.00479582
Northern America and Europe	Urban	Coal	1992	0.000856332	0.0114854	0.0617469
Oceania excluding Australia and New Zealand	Urban	Coal	1992	2.04882e-06	0.000235839	0.00724046
Sub-Saharan Africa	Urban	Coal	1992	0.00409776	0.0129496	0.0347325
Western Asia and Northern Africa	Urban	Coal	1992	1.1139e-05	0.00125866	0.0498524
Central Asia and Southern Asia	Urban	Coal	1993	0.0243245	0.051021	0.0873309
Eastern Asia and South-eastern Asia	Urban	Coal	1993	0.0446016	0.186541	0.404435
Latin America & the Caribbean	Urban	Coal	1993	0.000496227	0.00213717	0.00421449
Northern America and Europe	Urban	Coal	1993	0.00118976	0.0113059	0.0573581
Oceania excluding Australia and New Zealand	Urban	Coal	1993	2.40839e-06	0.000202734	0.00617258
Sub-Saharan Africa	Urban	Coal	1993	0.00422981	0.0123787	0.0335514
Western Asia and Northern Africa	Urban	Coal	1993	1.14415e-05	0.00109942	0.0376919
Central Asia and Southern Asia	Urban	Coal	1994	0.0220606	0.0460553	0.0786885
Eastern Asia and South-eastern Asia	Urban	Coal	1994	0.0469868	0.183596	0.390892
Latin America & the Caribbean	Urban	Coal	1994	0.000477958	0.00184666	0.00370694
Northern America and Europe	Urban	Coal	1994	0.000921228	0.0106818	0.0514772
Oceania excluding Australia and New Zealand	Urban	Coal	1994	1.47795e-06	0.000200302	0.00753673
Sub-Saharan Africa	Urban	Coal	1994	0.00380502	0.0118454	0.0294444
Western Asia and Northern Africa	Urban	Coal	1994	1.35079e-05	0.00110795	0.0321085
Central Asia and Southern Asia	Urban	Coal	1995	0.0206117	0.0415974	0.0734829
Eastern Asia and South-eastern Asia	Urban	Coal	1995	0.0515758	0.181497	0.378279
Latin America & the Caribbean	Urban	Coal	1995	0.000411383	0.00156633	0.00319786
Northern America and Europe	Urban	Coal	1995	0.000994947	0.0104729	0.0503207
Oceania excluding Australia and New Zealand	Urban	Coal	1995	2.45891e-06	0.000155356	0.00590604
Sub-Saharan Africa	Urban	Coal	1995	0.00369918	0.0111156	0.0267429
Western Asia and Northern Africa	Urban	Coal	1995	1.03992e-05	0.00112164	0.0301768
Central Asia and Southern Asia	Urban	Coal	1996	0.0191521	0.0387238	0.06502
Eastern Asia and South-eastern Asia	Urban	Coal	1996	0.0567519	0.183327	0.34956
Latin America & the Caribbean	Urban	Coal	1996	0.000296004	0.001382	0.00312099
Northern America and Europe	Urban	Coal	1996	0.00114252	0.0100224	0.0453381
Oceania excluding Australia and New Zealand	Urban	Coal	1996	1.26154e-06	0.000174162	0.00455913
Sub-Saharan Africa	Urban	Coal	1996	0.0033661	0.0108476	0.0274151
Western Asia and Northern Africa	Urban	Coal	1996	7.55767e-06	0.000940428	0.025906
Central Asia and Southern Asia	Urban	Coal	1997	0.0167042	0.0354752	0.0624204
Eastern Asia and South-eastern Asia	Urban	Coal	1997	0.0575938	0.182893	0.34028
Latin America & the Caribbean	Urban	Coal	1997	0.000351556	0.00120384	0.00255161
Northern America and Europe	Urban	Coal	1997	0.00107068	0.00967448	0.0378591
Oceania excluding Australia and New Zealand	Urban	Coal	1997	1.61501e-06	0.000146742	0.00532493
Sub-Saharan Africa	Urban	Coal	1997	0.00359456	0.0105135	0.025353
Western Asia and Northern Africa	Urban	Coal	1997	8.86835e-06	0.000849506	0.025518
Central Asia and Southern Asia	Urban	Coal	1998	0.0154711	0.0324976	0.0550013
Eastern Asia and South-eastern Asia	Urban	Coal	1998	0.0762599	0.174836	0.317867
Latin America & the Caribbean	Urban	Coal	1998	0.000263687	0.00112585	0.00247673
Northern America and Europe	Urban	Coal	1998	0.0012442	0.00858477	0.0342154
Oceania excluding Australia and New Zealand	Urban	Coal	1998	1.17118e-06	0.000167742	0.00406907
Sub-Saharan Africa	Urban	Coal	1998	0.00314832	0.00980571	0.0234595
Western Asia and Northern Africa	Urban	Coal	1998	1.14696e-05	0.000923394	0.0206107
Central Asia and Southern Asia	Urban	Coal	1999	0.0144893	0.0299999	0.0537654
Eastern Asia and South-eastern Asia	Urban	Coal	1999	0.0759919	0.17109	0.298821
Latin America & the Caribbean	Urban	Coal	1999	0.00026232	0.00102221	0.00223315
Northern America and Europe	Urban	Coal	1999	0.00120823	0.0081442	0.0304826
Oceania excluding Australia and New Zealand	Urban	Coal	1999	1.10123e-06	0.000135339	0.00376049
Sub-Saharan Africa	Urban	Coal	1999	0.00321174	0.00923103	0.0209541
Western Asia and Northern Africa	Urban	Coal	1999	7.86198e-06	0.000824571	0.0178861
Central Asia and Southern Asia	Urban	Coal	2000	0.0133578	0.0282232	0.0513975
Eastern Asia and South-eastern Asia	Urban	Coal	2000	0.0717857	0.169194	0.283878
Latin America & the Caribbean	Urban	Coal	2000	0.000210494	0.000979315	0.00227711
Northern America and Europe	Urban	Coal	2000	0.00115859	0.00748503	0.0258396
Oceania excluding Australia and New Zealand	Urban	Coal	2000	1.57367e-06	0.000151763	0.00371196
Sub-Saharan Africa	Urban	Coal	2000	0.00280792	0.00900855	0.0207636
Western Asia and Northern Africa	Urban	Coal	2000	8.15782e-06	0.000706311	0.0164555
Central Asia and Southern Asia	Urban	Coal	2001	0.0134628	0.0271839	0.0465223
Eastern Asia and South-eastern Asia	Urban	Coal	2001	0.072874	0.159757	0.275707
Latin America & the Caribbean	Urban	Coal	2001	0.000157269	0.00101945	0.0022952
Northern America and Europe	Urban	Coal	2001	0.00101761	0.00637261	0.0222909
Oceania excluding Australia and New Zealand	Urban	Coal	2001	1.41826e-06	0.000136577	0.00364179
Sub-Saharan Africa	Urban	Coal	2001	0.0023968	0.00857447	0.0194592
Western Asia and Northern Africa	Urban	Coal	2001	1.35078e-05	0.000678882	0.0135935
Central Asia and Southern Asia	Urban	Coal	2002	0.0117121	0.0260058	0.046858
Eastern Asia and South-eastern Asia	Urban	Coal	2002	0.0722491	0.152763	0.263728
Latin America & the Caribbean	Urban	Coal	2002	0.000154626	0.00102212	0.00231275
Northern America and Europe	Urban	Coal	2002	0.000979369	0.00638002	0.0199765
Oceania excluding Australia and New Zealand	Urban	Coal	2002	1.49556e-06	0.000150736	0.00340199
Sub-Saharan Africa	Urban	Coal	2002	0.00254791	0.00874808	0.0198443
Western Asia and Northern Africa	Urban	Coal	2002	8.15339e-06	0.000692831	0.00986925
Central Asia and Southern Asia	Urban	Coal	2003	0.0119022	0.0253935	0.0448176
Eastern Asia and South-eastern Asia	Urban	Coal	2003	0.0624203	0.146639	0.244618
Latin America & the Caribbean	Urban	Coal	2003	0.000136474	0.00100787	0.00243273
Northern America and Europe	Urban	Coal	2003	0.00108003	0.00537626	0.0204013
Oceania excluding Australia and New Zealand	Urban	Coal	2003	1.51514e-06	0.000137137	0.00359884
Sub-Saharan Africa	Urban	Coal	2003	0.00244958	0.00830631	0.0189846
Western Asia and Northern Africa	Urban	Coal	2003	8.79473e-06	0.000668219	0.00900709
Central Asia and Southern Asia	Urban	Coal	2004	0.0106247	0.0231116	0.0437928
Eastern Asia and South-eastern Asia	Urban	Coal	2004	0.0532026	0.139494	0.235886
Latin America & the Caribbean	Urban	Coal	2004	0.000140832	0.00100979	0.00237981
Northern America and Europe	Urban	Coal	2004	0.000948611	0.00509292	0.0186694
Oceania excluding Australia and New Zealand	Urban	Coal	2004	1.20119e-06	0.000134883	0.0040312
Sub-Saharan Africa	Urban	Coal	2004	0.00200949	0.00807919	0.0199043
Western Asia and Northern Africa	Urban	Coal	2004	7.61736e-06	0.000708542	0.00688424
Central Asia and Southern Asia	Urban	Coal	2005	0.00932958	0.0230187	0.043344
Eastern Asia and South-eastern Asia	Urban	Coal	2005	0.0547316	0.132078	0.232318
Latin America & the Caribbean	Urban	Coal	2005	0.000132924	0.00091899	0.00251186
Northern America and Europe	Urban	Coal	2005	0.000781916	0.00450649	0.0173139
Oceania excluding Australia and New Zealand	Urban	Coal	2005	1.26631e-06	0.000173877	0.00428604
Sub-Saharan Africa	Urban	Coal	2005	0.00189587	0.00845293	0.0193912
Western Asia and Northern Africa	Urban	Coal	2005	1.05737e-05	0.000633883	0.00747593
Central Asia and Southern Asia	Urban	Coal	2006	0.00896335	0.0219124	0.0409504
Eastern Asia and South-eastern Asia	Urban	Coal	2006	0.05249	0.121537	0.225157
Latin America & the Caribbean	Urban	Coal	2006	9.23663e-05	0.000897265	0.00246034
Northern America and Europe	Urban	Coal	2006	0.000747855	0.00387748	0.0153443
Oceania excluding Australia and New Zealand	Urban	Coal	2006	1.07813e-06	0.000168967	0.00420168
Sub-Saharan Africa	Urban	Coal	2006	0.00191299	0.0081575	0.0189224
Western Asia and Northern Africa	Urban	Coal	2006	1.23688e-05	0.000701123	0.00566404
Central Asia and Southern Asia	Urban	Coal	2007	0.00921799	0.0210875	0.0383568
Eastern Asia and South-eastern Asia	Urban	Coal	2007	0.0488137	0.113442	0.20404
Latin America & the Caribbean	Urban	Coal	2007	6.94306e-05	0.00087128	0.00245857
Northern America and Europe	Urban	Coal	2007	0.000528855	0.00341169	0.0146934
Oceania excluding Australia and New Zealand	Urban	Coal	2007	1.939e-06	0.000201911	0.00406212
Sub-Saharan Africa	Urban	Coal	2007	0.00147627	0.00847638	0.0202564
Western Asia and Northern Africa	Urban	Coal	2007	1.46787e-05	0.000631632	0.00554626
Central Asia and Southern Asia	Urban	Coal	2008	0.00703744	0.0198945	0.0375512
Eastern Asia and South-eastern Asia	Urban	Coal	2008	0.043398	0.105629	0.189782
Latin America & the Caribbean	Urban	Coal	2008	6.44558e-05	0.000765867	0.00240698
Northern America and Europe	Urban	Coal	2008	0.000586422	0.0033024	0.0135919
Oceania excluding Australia and New Zealand	Urban	Coal	2008	1.24212e-06	0.000185502	0.00422797
Sub-Saharan Africa	Urban	Coal	2008	0.00155449	0.00857043	0.020058
Western Asia and Northern Africa	Urban	Coal	2008	1.11097e-05	0.000598019	0.00535339
Central Asia and Southern Asia	Urban	Coal	2009	0.0077962	0.0190947	0.0382678
Eastern Asia and South-eastern Asia	Urban	Coal	2009	0.0389399	0.0969038	0.182809
Latin America & the Caribbean	Urban	Coal	2009	5.47097e-05	0.000742552	0.00238723
Northern America and Europe	Urban	Coal	2009	0.000438716	0.00271835	0.0147818
Oceania excluding Australia and New Zealand	Urban	Coal	2009	1.86474e-06	0.000224533	0.00553306
Sub-Saharan Africa	Urban	Coal	2009	0.00162166	0.00871647	0.0214325
Western Asia and Northern Africa	Urban	Coal	2009	1.17301e-05	0.000697294	0.00520712
Central Asia and Southern Asia	Urban	Coal	2010	0.00647854	0.0183697	0.0355639
Eastern Asia and South-eastern Asia	Urban	Coal	2010	0.035599	0.0868675	0.170934
Latin America & the Caribbean	Urban	Coal	2010	4.5662e-05	0.000670641	0.00209486
Northern America and Europe	Urban	Coal	2010	0.000378396	0.0025113	0.0141631
Oceania excluding Australia and New Zealand	Urban	Coal	2010	1.32238e-06	0.000252959	0.00516314
Sub-Saharan Africa	Urban	Coal	2010	0.00142928	0.00931187	0.021302
Western Asia and Northern Africa	Urban	Coal	2010	1.69331e-05	0.000678321	0.00471355
Central Asia and Southern Asia	Urban	Coal	2011	0.00717026	0.0178612	0.0344651
Eastern Asia and South-eastern Asia	Urban	Coal	2011	0.0321345	0.0804279	0.152706
Latin America & the Caribbean	Urban	Coal	2011	3.62491e-05	0.000591897	0.00203428
Northern America and Europe	Urban	Coal	2011	0.000270219	0.00218888	0.0170887
Oceania excluding Australia and New Zealand	Urban	Coal	2011	1.63163e-06	0.000214288	0.0064347
Sub-Saharan Africa	Urban	Coal	2011	0.00166445	0.0104989	0.0225257
Western Asia and Northern Africa	Urban	Coal	2011	1.43061e-05	0.000664735	0.00457621
Central Asia and Southern Asia	Urban	Coal	2012	0.00571303	0.0164402	0.0331729
Eastern Asia and South-eastern Asia	Urban	Coal	2012	0.0276005	0.073905	0.149356
Latin America & the Caribbean	Urban	Coal	2012	3.27412e-05	0.00048319	0.00194841
Northern America and Europe	Urban	Coal	2012	0.00022394	0.00225792	0.0239432
Oceania excluding Australia and New Zealand	Urban	Coal	2012	1.90177e-06	0.000220385	0.00700322
Sub-Saharan Africa	Urban	Coal	2012	0.00151505	0.0105954	0.0243149
Western Asia and Northern Africa	Urban	Coal	2012	1.93866e-05	0.000659135	0.00514492
Central Asia and Southern Asia	Urban	Coal	2013	0.0049568	0.0152957	0.0330526
Eastern Asia and South-eastern Asia	Urban	Coal	2013	0.0252846	0.0658949	0.142488
Latin America & the Caribbean	Urban	Coal	2013	3.01693e-05	0.000401206	0.00156767
Northern America and Europe	Urban	Coal	2013	0.000199964	0.00217505	0.0261937
Oceania excluding Australia and New Zealand	Urban	Coal	2013	1.23912e-06	0.0002982	0.00790119
Sub-Saharan Africa	Urban	Coal	2013	0.00166269	0.0119325	0.0282487
Western Asia and Northern Africa	Urban	Coal	2013	1.42459e-05	0.000739913	0.00498093
Central Asia and Southern Asia	Urban	Coal	2014	0.0045796	0.0142886	0.0310687
Eastern Asia and South-eastern Asia	Urban	Coal	2014	0.0199811	0.062019	0.14455
Latin America & the Caribbean	Urban	Coal	2014	2.44734e-05	0.000358486	0.0015832
Northern America and Europe	Urban	Coal	2014	0.000159946	0.00213954	0.03539
Oceania excluding Australia and New Zealand	Urban	Coal	2014	1.95977e-06	0.000260786	0.009619
Sub-Saharan Africa	Urban	Coal	2014	0.00196032	0.0126468	0.0281599
Western Asia and Northern Africa	Urban	Coal	2014	1.01717e-05	0.000730383	0.00511168
Central Asia and Southern Asia	Urban	Coal	2015	0.00242071	0.0126548	0.0302069
Eastern Asia and South-eastern Asia	Urban	Coal	2015	0.0197538	0.0570869	0.151283
Latin America & the Caribbean	Urban	Coal	2015	2.57673e-05	0.000299442	0.00142887
Northern America and Europe	Urban	Coal	2015	0.000140585	0.00217788	0.0408773
Oceania excluding Australia and New Zealand	Urban	Coal	2015	1.34369e-06	0.000300132	0.0108111
Sub-Saharan Africa	Urban	Coal	2015	0.00205623	0.014043	0.0318605
Western Asia and Northern Africa	Urban	Coal	2015	1.85064e-05	0.000878191	0.00544605
Central Asia and Southern Asia	Urban	Coal	2016	0.00187641	0.0125733	0.0322038
Eastern Asia and South-eastern Asia	Urban	Coal	2016	0.0159338	0.0521899	0.14643
Latin America & the Caribbean	Urban	Coal	2016	2.41292e-05	0.000285576	0.00136705
Northern America and Europe	Urban	Coal	2016	9.74315e-05	0.0020622	0.0645541
Oceania excluding Australia and New Zealand	Urban	Coal	2016	2.36639e-06	0.000327436	0.0138507
Sub-Saharan Africa	Urban	Coal	2016	0.00227251	0.0156699	0.0347169
Western Asia and Northern Africa	Urban	Coal	2016	1.46905e-05	0.000956143	0.00624392
Central Asia and Southern Asia	Urban	Coal	2017	0.00188474	0.0110751	0.0306999
Eastern Asia and South-eastern Asia	Urban	Coal	2017	0.0144236	0.0481156	0.138355
Latin America & the Caribbean	Urban	Coal	2017	1.97636e-05	0.000256306	0.00151715
Northern America and Europe	Urban	Coal	2017	0.000113652	0.00223176	0.071226
Oceania excluding Australia and New Zealand	Urban	Coal	2017	2.02894e-06	0.000384954	0.0149894
Sub-Saharan Africa	Urban	Coal	2017	0.00247228	0.0176461	0.0389243
Western Asia and Northern Africa	Urban	Coal	2017	1.47942e-05	0.000937475	0.00633099
Central Asia and Southern Asia	Urban	Coal	2018	0.00128606	0.010459	0.0323546
Eastern Asia and South-eastern Asia	Urban	Coal	2018	0.0136991	0.0438521	0.146678
Latin America & the Caribbean	Urban	Coal	2018	1.90959e-05	0.000225342	0.00135979
Northern America and Europe	Urban	Coal	2018	8.64187e-05	0.0021383	0.0979202
Oceania excluding Australia and New Zealand	Urban	Coal	2018	1.52378e-06	0.000393537	0.0175824
Sub-Saharan Africa	Urban	Coal	2018	0.00271546	0.018995	0.0421008
Western Asia and Northern Africa	Urban	Coal	2018	1.48018e-05	0.0011502	0.00768888
Central Asia and Southern Asia	Urban	Coal	2019	0.000613214	0.00872041	0.0321711
Eastern Asia and South-eastern Asia	Urban	Coal	2019	0.0118475	0.0392447	0.148538
Latin America & the Caribbean	Urban	Coal	2019	1.72798e-05	0.000224442	0.0013343
Northern America and Europe	Urban	Coal	2019	5.07366e-05	0.00198927	0.112177
Oceania excluding Australia and New Zealand	Urban	Coal	2019	4.50191e-06	0.000521782	0.0197136
Sub-Saharan Africa	Urban	Coal	2019	0.003156	0.0202275	0.0483479
Western Asia and Northern Africa	Urban	Coal	2019	2.01093e-05	0.00115784	0.00806572
Central Asia and Southern Asia	Urban	Coal	2020	0.000772689	0.00802683	0.0344809
Eastern Asia and South-eastern Asia	Urban	Coal	2020	0.0108844	0.0373516	0.165242
Latin America & the Caribbean	Urban	Coal	2020	1.8122e-05	0.000198182	0.00136975
Northern America and Europe	Urban	Coal	2020	6.83056e-05	0.00214043	0.135242
Oceania excluding Australia and New Zealand	Urban	Coal	2020	3.624e-06	0.000529062	0.0226824
Sub-Saharan Africa	Urban	Coal	2020	0.00345661	0.0226211	0.0559487
Western Asia and Northern Africa	Urban	Coal	2020	1.90262e-05	0.00132352	0.0102712
Central Asia and Southern Asia	Urban	Coal	2021	0.000540444	0.00699523	0.0357761
Eastern Asia and South-eastern Asia	Urban	Coal	2021	0.00987205	0.033916	0.158138
Latin America & the Caribbean	Urban	Coal	2021	1.6838e-05	0.000200338	0.00143089
Northern America and Europe	Urban	Coal	2021	4.26895e-05	0.00276125	0.163943
Oceania excluding Australia and New Zealand	Urban	Coal	2021	2.71831e-06	0.000564095	0.024068
Sub-Saharan Africa	Urban	Coal	2021	0.00400946	0.0246064	0.0588641
Western Asia and Northern Africa	Urban	Coal	2021	2.11347e-05	0.00132363	0.00971318
Central Asia and Southern Asia	Urban	Coal	2022	0.000327598	0.00624974	0.037664
Eastern Asia and South-eastern Asia	Urban	Coal	2022	0.0094491	0.0304543	0.173661
Latin America & the Caribbean	Urban	Coal	2022	1.6305e-05	0.000225637	0.00167913
Northern America and Europe	Urban	Coal	2022	4.2146e-05	0.00297117	0.176382
Oceania excluding Australia and New Zealand	Urban	Coal	2022	3.43791e-06	0.000671317	0.0249874
Sub-Saharan Africa	Urban	Coal	2022	0.00384952	0.0246921	0.0718169
Western Asia and Northern Africa	Urban	Coal	2022	1.40165e-05	0.00152018	0.0123606
Central Asia and Southern Asia	Urban	Coal	2023	0.000238747	0.00576491	0.0365689
Eastern Asia and South-eastern Asia	Urban	Coal	2023	0.00861972	0.0272672	0.173313
Latin America & the Caribbean	Urban	Coal	2023	1.51226e-05	0.000254136	0.00169076
Northern America and Europe	Urban	Coal	2023	3.45262e-05	0.00288814	0.246959
Oceania excluding Australia and New Zealand	Urban	Coal	2023	3.13213e-06	0.00076423	0.0262716
Sub-Saharan Africa	Urban	Coal	2023	0.00488025	0.0254241	0.0785014
Western Asia and Northern Africa	Urban	Coal	2023	2.71488e-05	0.00169018	0.0140347
Central Asia and Southern Asia	Urban	Coal	2024	0.000164596	0.0048737	0.035228
Eastern Asia and South-eastern Asia	Urban	Coal	2024	0.00797239	0.0249133	0.190201
Latin America & the Caribbean	Urban	Coal	2024	1.19716e-05	0.000216677	0.00175479
Northern America and Europe	Urban	Coal	2024	3.06775e-05	0.00343814	0.281379
Oceania excluding Australia and New Zealand	Urban	Coal	2024	3.19871e-06	0.000675989	0.0288463
Sub-Saharan Africa	Urban	Coal	2024	0.0059239	0.0298329	0.0837446
Western Asia and Northern Africa	Urban	Coal	2024	1.94164e-05	0.00181435	0.0163044
Central Asia and Southern Asia	Urban	Coal	2025	0.000102631	0.00458518	0.038525
Eastern Asia and South-eastern Asia	Urban	Coal	2025	0.00691904	0.022037	0.194679
Latin America & the Caribbean	Urban	Coal	2025	1.73958e-05	0.000240586	0.00203242
Northern America and Europe	Urban	Coal	2025	1.86254e-05	0.00364758	0.291712
Oceania excluding Australia and New Zealand	Urban	Coal	2025	3.23673e-06	0.000856129	0.0303289
Sub-Saharan Africa	Urban	Coal	2025	0.00624634	0.030676	0.097217
Western Asia and Northern Africa	Urban	Coal	2025	2.59184e-05	0.001856	0.019599
Central Asia and Southern Asia	Urban	Coal	2026	8.17711e-05	0.00377145	0.0390988
Eastern Asia and South-eastern Asia	Urban	Coal	2026	0.00651716	0.0207025	0.189773
Latin America & the Caribbean	Urban	Coal	2026	1.73682e-05	0.000259344	0.00230184
Northern America and Europe	Urban	Coal	2026	2.05676e-05	0.00374427	0.357809
Oceania excluding Australia and New Zealand	Urban	Coal	2026	4.27264e-06	0.000840297	0.0307981
Sub-Saharan Africa	Urban	Coal	2026	0.00712189	0.0306924	0.1095
Western Asia and Northern Africa	Urban	Coal	2026	1.26161e-05	0.0022263	0.0222214
Central Asia and Southern Asia	Urban	Coal	2027	9.12085e-05	0.00334783	0.0443618
Eastern Asia and South-eastern Asia	Urban	Coal	2027	0.00569006	0.0189483	0.194405
Latin America & the Caribbean	Urban	Coal	2027	1.49619e-05	0.000281748	0.00219181
Northern America and Europe	Urban	Coal	2027	2.26971e-05	0.00403313	0.388945
Oceania excluding Australia and New Zealand	Urban	Coal	2027	4.37628e-06	0.00108518	0.0308918
Sub-Saharan Africa	Urban	Coal	2027	0.00784274	0.0329097	0.119747
Western Asia and Northern Africa	Urban	Coal	2027	1.83425e-05	0.00225909	0.023466
Central Asia and Southern Asia	Urban	Coal	2028	5.32796e-05	0.00324515	0.0471891
Eastern Asia and South-eastern Asia	Urban	Coal	2028	0.00505933	0.0175495	0.201059
Latin America & the Caribbean	Urban	Coal	2028	1.38058e-05	0.000302691	0.00292145
Northern America and Europe	Urban	Coal	2028	1.40111e-05	0.00394919	0.395743
Oceania excluding Australia and New Zealand	Urban	Coal	2028	5.90603e-06	0.00135469	0.0337265
Sub-Saharan Africa	Urban	Coal	2028	0.00870475	0.0354498	0.128953
Western Asia and Northern Africa	Urban	Coal	2028	1.86401e-05	0.00234688	0.0259125
Central Asia and Southern Asia	Urban	Coal	2029	5.52156e-05	0.00294888	0.0405041
Eastern Asia and South-eastern Asia	Urban	Coal	2029	0.0042682	0.016138	0.203107
Latin America & the Caribbean	Urban	Coal	2029	1.81184e-05	0.000314788	0.00365135
Northern America and Europe	Urban	Coal	2029	1.65844e-05	0.00476586	0.423031
Oceania excluding Australia and New Zealand	Urban	Coal	2029	5.0859e-06	0.00129952	0.0344827
Sub-Saharan Africa	Urban	Coal	2029	0.00986695	0.0403214	0.137882
Western Asia and Northern Africa	Urban	Coal	2029	3.08695e-05	0.00261261	0.029951
Central Asia and Southern Asia	Urban	Coal	2030	6.49821e-05	0.00289607	0.0422125
Eastern Asia and South-eastern Asia	Urban	Coal	2030	0.00384173	0.0145845	0.209893
Latin America & the Caribbean	Urban	Coal	2030	1.78244e-05	0.000354209	0.00452403
Northern America and Europe	Urban	Coal	2030	1.94875e-05	0.00540469	0.4692
Oceania excluding Australia and New Zealand	Urban	Coal	2030	5.65073e-06	0.00157648	0.0354764
Sub-Saharan Africa	Urban	Coal	2030	0.00969257	0.0413973	0.146542
Western Asia and Northern Africa	Urban	Coal	2030	2.85864e-05	0.0028782	0.0327266
Central Asia and Southern Asia	Urban	Kerosene	1990	0.107331	0.169836	0.249291
Eastern Asia and South-eastern Asia	Urban	Kerosene	1990	0.0738738	0.0986335	0.121101
Latin America & the Caribbean	Urban	Kerosene	1990	0.0297228	0.0496629	0.0751247
Northern America and Europe	Urban	Kerosene	1990	0.000337178	0.00622305	0.0530006
Oceania excluding Australia and New Zealand	Urban	Kerosene	1990	0.084231	0.236736	0.577606
Sub-Saharan Africa	Urban	Kerosene	1990	0.0968719	0.179641	0.274106
Western Asia and Northern Africa	Urban	Kerosene	1990	0.0144676	0.0645763	0.177496
Central Asia and Southern Asia	Urban	Kerosene	1991	0.11156	0.172476	0.246022
Eastern Asia and South-eastern Asia	Urban	Kerosene	1991	0.0767884	0.0996828	0.123139
Latin America & the Caribbean	Urban	Kerosene	1991	0.0289023	0.0465022	0.0679814
Northern America and Europe	Urban	Kerosene	1991	0.000314819	0.00588368	0.048777
Oceania excluding Australia and New Zealand	Urban	Kerosene	1991	0.0864687	0.228668	0.565092
Sub-Saharan Africa	Urban	Kerosene	1991	0.0984694	0.183478	0.269123
Western Asia and Northern Africa	Urban	Kerosene	1991	0.0132402	0.0588897	0.163971
Central Asia and Southern Asia	Urban	Kerosene	1992	0.119013	0.175373	0.246433
Eastern Asia and South-eastern Asia	Urban	Kerosene	1992	0.0789151	0.101339	0.123995
Latin America & the Caribbean	Urban	Kerosene	1992	0.0275101	0.0436514	0.0631858
Northern America and Europe	Urban	Kerosene	1992	0.000195955	0.00500086	0.0425968
Oceania excluding Australia and New Zealand	Urban	Kerosene	1992	0.0941347	0.234313	0.544284
Sub-Saharan Africa	Urban	Kerosene	1992	0.105298	0.184719	0.269382
Western Asia and Northern Africa	Urban	Kerosene	1992	0.0142243	0.0549965	0.143661
Central Asia and Southern Asia	Urban	Kerosene	1993	0.124014	0.178038	0.246824
Eastern Asia and South-eastern Asia	Urban	Kerosene	1993	0.0812627	0.103212	0.125578
Latin America & the Caribbean	Urban	Kerosene	1993	0.0269862	0.0408754	0.0605458
Northern America and Europe	Urban	Kerosene	1993	0.000245138	0.00522424	0.0402286
Oceania excluding Australia and New Zealand	Urban	Kerosene	1993	0.0919421	0.23923	0.51873
Sub-Saharan Africa	Urban	Kerosene	1993	0.10976	0.184876	0.264155
Western Asia and Northern Africa	Urban	Kerosene	1993	0.0131992	0.0512119	0.128802
Central Asia and Southern Asia	Urban	Kerosene	1994	0.121746	0.178209	0.242642
Eastern Asia and South-eastern Asia	Urban	Kerosene	1994	0.0808445	0.104196	0.125008
Latin America & the Caribbean	Urban	Kerosene	1994	0.0259461	0.0381094	0.0555987
Northern America and Europe	Urban	Kerosene	1994	0.000147228	0.00415358	0.035655
Oceania excluding Australia and New Zealand	Urban	Kerosene	1994	0.0991793	0.233397	0.526691
Sub-Saharan Africa	Urban	Kerosene	1994	0.116022	0.185872	0.257758
Western Asia and Northern Africa	Urban	Kerosene	1994	0.0131744	0.0459988	0.118207
Central Asia and Southern Asia	Urban	Kerosene	1995	0.123265	0.175291	0.241575
Eastern Asia and South-eastern Asia	Urban	Kerosene	1995	0.0818646	0.106264	0.129006
Latin America & the Caribbean	Urban	Kerosene	1995	0.0244277	0.0352297	0.050426
Northern America and Europe	Urban	Kerosene	1995	0.000176219	0.00416323	0.0323064
Oceania excluding Australia and New Zealand	Urban	Kerosene	1995	0.107163	0.234196	0.504814
Sub-Saharan Africa	Urban	Kerosene	1995	0.119788	0.187665	0.256938
Western Asia and Northern Africa	Urban	Kerosene	1995	0.0112944	0.0419307	0.0984231
Central Asia and Southern Asia	Urban	Kerosene	1996	0.11476	0.172525	0.236989
Eastern Asia and South-eastern Asia	Urban	Kerosene	1996	0.0829266	0.106844	0.13031
Latin America & the Caribbean	Urban	Kerosene	1996	0.0229463	0.0323615	0.0470325
Northern America and Europe	Urban	Kerosene	1996	0.000136933	0.00362782	0.0283704
Oceania excluding Australia and New Zealand	Urban	Kerosene	1996	0.108045	0.22835	0.468942
Sub-Saharan Africa	Urban	Kerosene	1996	0.125008	0.186439	0.250712
Western Asia and Northern Africa	Urban	Kerosene	1996	0.0110832	0.0374147	0.0884618
Central Asia and Southern Asia	Urban	Kerosene	1997	0.109517	0.164351	0.232473
Eastern Asia and South-eastern Asia	Urban	Kerosene	1997	0.0870856	0.107906	0.128512
Latin America & the Caribbean	Urban	Kerosene	1997	0.0210264	0.0294066	0.045087
Northern America and Europe	Urban	Kerosene	1997	0.000148948	0.00330685	0.0282526
Oceania excluding Australia and New Zealand	Urban	Kerosene	1997	0.109057	0.227873	0.469001
Sub-Saharan Africa	Urban	Kerosene	1997	0.126899	0.187047	0.245376
Western Asia and Northern Africa	Urban	Kerosene	1997	0.00957829	0.033745	0.0811541
Central Asia and Southern Asia	Urban	Kerosene	1998	0.110091	0.153723	0.210738
Eastern Asia and South-eastern Asia	Urban	Kerosene	1998	0.0847703	0.106742	0.127505
Latin America & the Caribbean	Urban	Kerosene	1998	0.0186937	0.0261375	0.0398132
Northern America and Europe	Urban	Kerosene	1998	0.000119908	0.00311049	0.0212587
Oceania excluding Australia and New Zealand	Urban	Kerosene	1998	0.107478	0.227297	0.4403
Sub-Saharan Africa	Urban	Kerosene	1998	0.132809	0.185406	0.24328
Western Asia and Northern Africa	Urban	Kerosene	1998	0.00951235	0.0316559	0.0736809
Central Asia and Southern Asia	Urban	Kerosene	1999	0.0967387	0.144315	0.198008
Eastern Asia and South-eastern Asia	Urban	Kerosene	1999	0.0839283	0.106339	0.127685
Latin America & the Caribbean	Urban	Kerosene	1999	0.0163753	0.0228604	0.0372834
Northern America and Europe	Urban	Kerosene	1999	0.000104639	0.00298562	0.0237336
Oceania excluding Australia and New Zealand	Urban	Kerosene	1999	0.110861	0.223457	0.443907
Sub-Saharan Africa	Urban	Kerosene	1999	0.134758	0.182331	0.237061
Western Asia and Northern Africa	Urban	Kerosene	1999	0.00865165	0.0277701	0.0688236
Central Asia and Southern Asia	Urban	Kerosene	2000	0.0842041	0.129954	0.189187
Eastern Asia and South-eastern Asia	Urban	Kerosene	2000	0.0810712	0.105078	0.1253
Latin America & the Caribbean	Urban	Kerosene	2000	0.0139482	0.0196146	0.0323284
Northern America and Europe	Urban	Kerosene	2000	0.000103468	0.00245381	0.0220187
Oceania excluding Australia and New Zealand	Urban	Kerosene	2000	0.112877	0.218767	0.415867
Sub-Saharan Africa	Urban	Kerosene	2000	0.138419	0.181684	0.226392
Western Asia and Northern Africa	Urban	Kerosene	2000	0.00750721	0.0244059	0.0592755
Central Asia and Southern Asia	Urban	Kerosene	2001	0.0756006	0.117668	0.170785
Eastern Asia and South-eastern Asia	Urban	Kerosene	2001	0.0794794	0.101576	0.123351
Latin America & the Caribbean	Urban	Kerosene	2001	0.011926	0.0167836	0.0297966
Northern America and Europe	Urban	Kerosene	2001	8.53225e-05	0.00230891	0.0219845
Oceania excluding Australia and New Zealand	Urban	Kerosene	2001	0.115656	0.217461	0.38858
Sub-Saharan Africa	Urban	Kerosene	2001	0.13931	0.178899	0.218351
Western Asia and Northern Africa	Urban	Kerosene	2001	0.00682894	0.0217763	0.0500641
Central Asia and Southern Asia	Urban	Kerosene	2002	0.0652824	0.103959	0.158786
Eastern Asia and South-eastern Asia	Urban	Kerosene	2002	0.0736249	0.0976347	0.118705
Latin America & the Caribbean	Urban	Kerosene	2002	0.00980255	0.014062	0.0269119
Northern America and Europe	Urban	Kerosene	2002	7.92153e-05	0.00214577	0.0197248
Oceania excluding Australia and New Zealand	Urban	Kerosene	2002	0.120061	0.213725	0.359772
Sub-Saharan Africa	Urban	Kerosene	2002	0.141378	0.177176	0.216289
Western Asia and Northern Africa	Urban	Kerosene	2002	0.00588904	0.0183483	0.0420578
Central Asia and Southern Asia	Urban	Kerosene	2003	0.0569167	0.0919377	0.140831
Eastern Asia and South-eastern Asia	Urban	Kerosene	2003	0.0683227	0.0934799	0.114597
Latin America & the Caribbean	Urban	Kerosene	2003	0.00774361	0.0116725	0.0228977
Northern America and Europe	Urban	Kerosene	2003	6.91166e-05	0.00199556	0.0194393
Oceania excluding Australia and New Zealand	Urban	Kerosene	2003	0.120458	0.205745	0.359993
Sub-Saharan Africa	Urban	Kerosene	2003	0.139725	0.174094	0.211002
Western Asia and Northern Africa	Urban	Kerosene	2003	0.00506468	0.0168216	0.0410102
Central Asia and Southern Asia	Urban	Kerosene	2004	0.0486277	0.0813794	0.129491
Eastern Asia and South-eastern Asia	Urban	Kerosene	2004	0.0642319	0.0884777	0.109069
Latin America & the Caribbean	Urban	Kerosene	2004	0.00591228	0.00969969	0.0228788
Northern America and Europe	Urban	Kerosene	2004	6.39084e-05	0.00188027	0.0179802
Oceania excluding Australia and New Zealand	Urban	Kerosene	2004	0.119545	0.204501	0.340323
Sub-Saharan Africa	Urban	Kerosene	2004	0.135865	0.172289	0.20852
Western Asia and Northern Africa	Urban	Kerosene	2004	0.00427101	0.0140606	0.0366154
Central Asia and Southern Asia	Urban	Kerosene	2005	0.0388739	0.0707962	0.112268
Eastern Asia and South-eastern Asia	Urban	Kerosene	2005	0.0570577	0.0811065	0.10263
Latin America & the Caribbean	Urban	Kerosene	2005	0.00491562	0.00792384	0.0194421
Northern America and Europe	Urban	Kerosene	2005	6.53074e-05	0.00162211	0.0178871
Oceania excluding Australia and New Zealand	Urban	Kerosene	2005	0.123506	0.195888	0.319476
Sub-Saharan Africa	Urban	Kerosene	2005	0.137988	0.16918	0.203972
Western Asia and Northern Africa	Urban	Kerosene	2005	0.00387558	0.012831	0.0338493
Central Asia and Southern Asia	Urban	Kerosene	2006	0.0333544	0.061922	0.104591
Eastern Asia and South-eastern Asia	Urban	Kerosene	2006	0.0484074	0.0721979	0.098202
Latin America & the Caribbean	Urban	Kerosene	2006	0.00356954	0.00646139	0.0183883
Northern America and Europe	Urban	Kerosene	2006	7.07329e-05	0.00149275	0.0170171
Oceania excluding Australia and New Zealand	Urban	Kerosene	2006	0.121068	0.190554	0.307083
Sub-Saharan Africa	Urban	Kerosene	2006	0.13867	0.167158	0.203265
Western Asia and Northern Africa	Urban	Kerosene	2006	0.00329333	0.0107453	0.0295248
Central Asia and Southern Asia	Urban	Kerosene	2007	0.0293461	0.0531579	0.0899632
Eastern Asia and South-eastern Asia	Urban	Kerosene	2007	0.0400179	0.0622515	0.0867372
Latin America & the Caribbean	Urban	Kerosene	2007	0.00272127	0.00546364	0.0164168
Northern America and Europe	Urban	Kerosene	2007	5.56734e-05	0.00141289	0.0209335
Oceania excluding Australia and New Zealand	Urban	Kerosene	2007	0.119721	0.187757	0.288554
Sub-Saharan Africa	Urban	Kerosene	2007	0.132789	0.167212	0.197186
Western Asia and Northern Africa	Urban	Kerosene	2007	0.00270587	0.00941922	0.0263512
Central Asia and Southern Asia	Urban	Kerosene	2008	0.0241431	0.048437	0.0853575
Eastern Asia and South-eastern Asia	Urban	Kerosene	2008	0.0308845	0.0514762	0.0781642
Latin America & the Caribbean	Urban	Kerosene	2008	0.00229461	0.00462617	0.0154759
Northern America and Europe	Urban	Kerosene	2008	5.0376e-05	0.00136569	0.0227007
Oceania excluding Australia and New Zealand	Urban	Kerosene	2008	0.123138	0.183096	0.27805
Sub-Saharan Africa	Urban	Kerosene	2008	0.136986	0.164818	0.1966
Western Asia and Northern Africa	Urban	Kerosene	2008	0.00272044	0.00842084	0.0242142
Central Asia and Southern Asia	Urban	Kerosene	2009	0.0202289	0.0418279	0.0780146
Eastern Asia and South-eastern Asia	Urban	Kerosene	2009	0.0234429	0.041831	0.0710556
Latin America & the Caribbean	Urban	Kerosene	2009	0.00181572	0.00401448	0.015689
Northern America and Europe	Urban	Kerosene	2009	5.69558e-05	0.00148526	0.0242833
Oceania excluding Australia and New Zealand	Urban	Kerosene	2009	0.117452	0.183914	0.264109
Sub-Saharan Africa	Urban	Kerosene	2009	0.133447	0.162143	0.192369
Western Asia and Northern Africa	Urban	Kerosene	2009	0.00229272	0.00771994	0.0228034
Central Asia and Southern Asia	Urban	Kerosene	2010	0.0174365	0.038721	0.0735737
Eastern Asia and South-eastern Asia	Urban	Kerosene	2010	0.0161682	0.0325042	0.0605121
Latin America & the Caribbean	Urban	Kerosene	2010	0.00156243	0.00343975	0.0142508
Northern America and Europe	Urban	Kerosene	2010	4.89415e-05	0.00174886	0.0257177
Oceania excluding Australia and New Zealand	Urban	Kerosene	2010	0.115948	0.17393	0.258899
Sub-Saharan Africa	Urban	Kerosene	2010	0.128116	0.159365	0.190425
Western Asia and Northern Africa	Urban	Kerosene	2010	0.00199867	0.00704597	0.0190783
Central Asia and Southern Asia	Urban	Kerosene	2011	0.0141799	0.0346444	0.0691151
Eastern Asia and South-eastern Asia	Urban	Kerosene	2011	0.00997884	0.0248111	0.0529431
Latin America & the Caribbean	Urban	Kerosene	2011	0.0014372	0.00316246	0.015154
Northern America and Europe	Urban	Kerosene	2011	6.81054e-05	0.00179702	0.0264361
Oceania excluding Australia and New Zealand	Urban	Kerosene	2011	0.104495	0.173793	0.26831
Sub-Saharan Africa	Urban	Kerosene	2011	0.127453	0.155817	0.187535
Western Asia and Northern Africa	Urban	Kerosene	2011	0.0016686	0.0065058	0.0210011
Central Asia and Southern Asia	Urban	Kerosene	2012	0.0117156	0.0322273	0.0653183
Eastern Asia and South-eastern Asia	Urban	Kerosene	2012	0.00766823	0.0193373	0.0425839
Latin America & the Caribbean	Urban	Kerosene	2012	0.00126549	0.00309548	0.0142884
Northern America and Europe	Urban	Kerosene	2012	5.22431e-05	0.00190181	0.0318652
Oceania excluding Australia and New Zealand	Urban	Kerosene	2012	0.108365	0.171901	0.277085
Sub-Saharan Africa	Urban	Kerosene	2012	0.12172	0.150173	0.179065
Western Asia and Northern Africa	Urban	Kerosene	2012	0.00160542	0.00623212	0.02028
Central Asia and Southern Asia	Urban	Kerosene	2013	0.0106007	0.0289704	0.0655293
Eastern Asia and South-eastern Asia	Urban	Kerosene	2013	0.00457995	0.014472	0.0366509
Latin America & the Caribbean	Urban	Kerosene	2013	0.00120486	0.00302115	0.0136868
Northern America and Europe	Urban	Kerosene	2013	6.56392e-05	0.00209796	0.0335261
Oceania excluding Australia and New Zealand	Urban	Kerosene	2013	0.103587	0.168108	0.284221
Sub-Saharan Africa	Urban	Kerosene	2013	0.114905	0.144574	0.17593
Western Asia and Northern Africa	Urban	Kerosene	2013	0.00151359	0.00585308	0.0184197
Central Asia and Southern Asia	Urban	Kerosene	2014	0.00839113	0.0272745	0.0589544
Eastern Asia and South-eastern Asia	Urban	Kerosene	2014	0.00314679	0.0117738	0.0375787
Latin America & the Caribbean	Urban	Kerosene	2014	0.00105537	0.00296044	0.0135467
Northern America and Europe	Urban	Kerosene	2014	9.27391e-05	0.0022426	0.0424112
Oceania excluding Australia and New Zealand	Urban	Kerosene	2014	0.102365	0.165945	0.286348
Sub-Saharan Africa	Urban	Kerosene	2014	0.108795	0.137168	0.165389
Western Asia and Northern Africa	Urban	Kerosene	2014	0.00135269	0.00570232	0.0190118
Central Asia and Southern Asia	Urban	Kerosene	2015	0.00774768	0.0258959	0.0586104
Eastern Asia and South-eastern Asia	Urban	Kerosene	2015	0.00239976	0.00930181	0.0281174
Latin America & the Caribbean	Urban	Kerosene	2015	0.00104198	0.00297898	0.0149426
Northern America and Europe	Urban	Kerosene	2015	7.00367e-05	0.00247598	0.0361264
Oceania excluding Australia and New Zealand	Urban	Kerosene	2015	0.0961676	0.165497	0.309722
Sub-Saharan Africa	Urban	Kerosene	2015	0.0986158	0.125779	0.153746
Western Asia and Northern Africa	Urban	Kerosene	2015	0.00112611	0.00573507	0.0183725
Central Asia and Southern Asia	Urban	Kerosene	2016	0.00647034	0.0227667	0.0581828
Eastern Asia and South-eastern Asia	Urban	Kerosene	2016	0.00154602	0.00755607	0.0304579
Latin America & the Caribbean	Urban	Kerosene	2016	0.00107059	0.00304865	0.0155549
Northern America and Europe	Urban	Kerosene	2016	7.76061e-05	0.00275344	0.0559833
Oceania excluding Australia and New Zealand	Urban	Kerosene	2016	0.0923716	0.161685	0.325576
Sub-Saharan Africa	Urban	Kerosene	2016	0.0902132	0.113695	0.141567
Western Asia and Northern Africa	Urban	Kerosene	2016	0.00123852	0.00560977	0.0169222
Central Asia and Southern Asia	Urban	Kerosene	2017	0.00552452	0.0228025	0.0586114
Eastern Asia and South-eastern Asia	Urban	Kerosene	2017	0.00104286	0.00585818	0.027437
Latin America & the Caribbean	Urban	Kerosene	2017	0.00110267	0.00330035	0.0139059
Northern America and Europe	Urban	Kerosene	2017	0.00010663	0.0026422	0.0567317
Oceania excluding Australia and New Zealand	Urban	Kerosene	2017	0.090795	0.161544	0.335919
Sub-Saharan Africa	Urban	Kerosene	2017	0.0768911	0.100787	0.126669
Western Asia and Northern Africa	Urban	Kerosene	2017	0.00110723	0.00571494	0.0223592
Central Asia and Southern Asia	Urban	Kerosene	2018	0.00400489	0.0206626	0.0584571
Eastern Asia and South-eastern Asia	Urban	Kerosene	2018	0.000918173	0.00508615	0.0288549
Latin America & the Caribbean	Urban	Kerosene	2018	0.00106505	0.00348188	0.0144537
Northern America and Europe	Urban	Kerosene	2018	0.000115602	0.0030806	0.0727843
Oceania excluding Australia and New Zealand	Urban	Kerosene	2018	0.0834107	0.160333	0.342397
Sub-Saharan Africa	Urban	Kerosene	2018	0.0639847	0.0870242	0.112688
Western Asia and Northern Africa	Urban	Kerosene	2018	0.00125035	0.00582686	0.0217689
Central Asia and Southern Asia	Urban	Kerosene	2019	0.00382034	0.0196277	0.0619019
Eastern Asia and South-eastern Asia	Urban	Kerosene	2019	0.00063905	0.00434703	0.033498
Latin America & the Caribbean	Urban	Kerosene	2019	0.00119373	0.00373507	0.0154826
Northern America and Europe	Urban	Kerosene	2019	0.000114672	0.00310157	0.0777109
Oceania excluding Australia and New Zealand	Urban	Kerosene	2019	0.0797206	0.158601	0.364889
Sub-Saharan Africa	Urban	Kerosene	2019	0.0528508	0.0735183	0.0999899
Western Asia and Northern Africa	Urban	Kerosene	2019	0.00103526	0.0059791	0.023926
Central Asia and Southern Asia	Urban	Kerosene	2020	0.00317974	0.0195514	0.0602239
Eastern Asia and South-eastern Asia	Urban	Kerosene	2020	0.000476785	0.00355837	0.0261848
Latin America & the Caribbean	Urban	Kerosene	2020	0.00124586	0.0040014	0.0162352
Northern America and Europe	Urban	Kerosene	2020	0.000133967	0.00391152	0.0860398
Oceania excluding Australia and New Zealand	Urban	Kerosene	2020	0.0747129	0.155256	0.37889
Sub-Saharan Africa	Urban	Kerosene	2020	0.0418964	0.0620024	0.0842852
Western Asia and Northern Africa	Urban	Kerosene	2020	0.00116237	0.00627154	0.0230235
Central Asia and Southern Asia	Urban	Kerosene	2021	0.00219909	0.0177918	0.0630568
Eastern Asia and South-eastern Asia	Urban	Kerosene	2021	0.000470323	0.00325238	0.027375
Latin America & the Caribbean	Urban	Kerosene	2021	0.00129297	0.00454731	0.0171632
Northern America and Europe	Urban	Kerosene	2021	0.000173541	0.00434839	0.11666
Oceania excluding Australia and New Zealand	Urban	Kerosene	2021	0.0686005	0.154998	0.410023
Sub-Saharan Africa	Urban	Kerosene	2021	0.0342936	0.0521055	0.0757449
Western Asia and Northern Africa	Urban	Kerosene	2021	0.00145619	0.00675423	0.0280644
Central Asia and Southern Asia	Urban	Kerosene	2022	0.00217402	0.0170308	0.0665725
Eastern Asia and South-eastern Asia	Urban	Kerosene	2022	0.000489465	0.00305735	0.0333305
Latin America & the Caribbean	Urban	Kerosene	2022	0.00142755	0.00502977	0.0174102
Northern America and Europe	Urban	Kerosene	2022	0.000142401	0.00453663	0.152107
Oceania excluding Australia and New Zealand	Urban	Kerosene	2022	0.060949	0.154018	0.431602
Sub-Saharan Africa	Urban	Kerosene	2022	0.0270354	0.0443902	0.0682066
Western Asia and Northern Africa	Urban	Kerosene	2022	0.00101616	0.00713188	0.0312698
Central Asia and Southern Asia	Urban	Kerosene	2023	0.00178353	0.0162185	0.0714578
Eastern Asia and South-eastern Asia	Urban	Kerosene	2023	0.000362109	0.00280364	0.0328515
Latin America & the Caribbean	Urban	Kerosene	2023	0.00132672	0.00580291	0.0207533
Northern America and Europe	Urban	Kerosene	2023	0.000181576	0.0050621	0.151428
Oceania excluding Australia and New Zealand	Urban	Kerosene	2023	0.0588094	0.149957	0.427213
Sub-Saharan Africa	Urban	Kerosene	2023	0.022851	0.0379197	0.0610603
Western Asia and Northern Africa	Urban	Kerosene	2023	0.00143061	0.00767871	0.0298158
Central Asia and Southern Asia	Urban	Kerosene	2024	0.00169263	0.0150033	0.0653458
Eastern Asia and South-eastern Asia	Urban	Kerosene	2024	0.000396258	0.00281178	0.0351507
Latin America & the Caribbean	Urban	Kerosene	2024	0.0015069	0.00593091	0.0215244
Northern America and Europe	Urban	Kerosene	2024	0.000197653	0.00567919	0.194893
Oceania excluding Australia and New Zealand	Urban	Kerosene	2024	0.0565314	0.154506	0.463544
Sub-Saharan Africa	Urban	Kerosene	2024	0.0195018	0.0338571	0.0619849
Western Asia and Northern Africa	Urban	Kerosene	2024	0.00129046	0.00819087	0.0340235
Central Asia and Southern Asia	Urban	Kerosene	2025	0.00160182	0.0153472	0.0692005
Eastern Asia and South-eastern Asia	Urban	Kerosene	2025	0.000243727	0.0027534	0.0371705
Latin America & the Caribbean	Urban	Kerosene	2025	0.00170565	0.00694363	0.0243227
Northern America and Europe	Urban	Kerosene	2025	0.00019692	0.00614851	0.229133
Oceania excluding Australia and New Zealand	Urban	Kerosene	2025	0.0530148	0.149741	0.471134
Sub-Saharan Africa	Urban	Kerosene	2025	0.016337	0.0307141	0.0581994
Western Asia and Northern Africa	Urban	Kerosene	2025	0.00120307	0.00893423	0.0375497
Central Asia and Southern Asia	Urban	Kerosene	2026	0.00129304	0.0146001	0.0742599
Eastern Asia and South-eastern Asia	Urban	Kerosene	2026	0.000293797	0.00278524	0.0455993
Latin America & the Caribbean	Urban	Kerosene	2026	0.00177944	0.00760998	0.0270214
Northern America and Europe	Urban	Kerosene	2026	0.000172992	0.00702741	0.250385
Oceania excluding Australia and New Zealand	Urban	Kerosene	2026	0.0499298	0.149543	0.51173
Sub-Saharan Africa	Urban	Kerosene	2026	0.0144666	0.0292358	0.060034
Western Asia and Northern Africa	Urban	Kerosene	2026	0.00156273	0.00970687	0.045195
Central Asia and Southern Asia	Urban	Kerosene	2027	0.00116361	0.0151168	0.0789715
Eastern Asia and South-eastern Asia	Urban	Kerosene	2027	0.000366982	0.00272495	0.0461874
Latin America & the Caribbean	Urban	Kerosene	2027	0.00192892	0.00840436	0.0299989
Northern America and Europe	Urban	Kerosene	2027	0.000218613	0.0074834	0.283731
Oceania excluding Australia and New Zealand	Urban	Kerosene	2027	0.0458466	0.147602	0.523878
Sub-Saharan Africa	Urban	Kerosene	2027	0.013911	0.0280473	0.0628768
Western Asia and Northern Africa	Urban	Kerosene	2027	0.00118753	0.0103011	0.0471453
Central Asia and Southern Asia	Urban	Kerosene	2028	0.00111962	0.0146646	0.0839972
Eastern Asia and South-eastern Asia	Urban	Kerosene	2028	0.000324102	0.00275566	0.0567128
Latin America & the Caribbean	Urban	Kerosene	2028	0.00199529	0.00936743	0.0342559
Northern America and Europe	Urban	Kerosene	2028	0.000269139	0.00805921	0.301736
Oceania excluding Australia and New Zealand	Urban	Kerosene	2028	0.0446961	0.147649	0.538455
Sub-Saharan Africa	Urban	Kerosene	2028	0.0125253	0.0272944	0.0638452
Western Asia and Northern Africa	Urban	Kerosene	2028	0.00122946	0.0108045	0.0531134
Central Asia and Southern Asia	Urban	Kerosene	2029	0.00120505	0.0139649	0.0878972
Eastern Asia and South-eastern Asia	Urban	Kerosene	2029	0.000323774	0.00298192	0.0752197
Latin America & the Caribbean	Urban	Kerosene	2029	0.00216026	0.0099483	0.0378624
Northern America and Europe	Urban	Kerosene	2029	0.000292391	0.0093982	0.326932
Oceania excluding Australia and New Zealand	Urban	Kerosene	2029	0.0427386	0.143287	0.549903
Sub-Saharan Africa	Urban	Kerosene	2029	0.0116655	0.0267469	0.0715773
Western Asia and Northern Africa	Urban	Kerosene	2029	0.00166183	0.012316	0.0615706
Central Asia and Southern Asia	Urban	Kerosene	2030	0.000996717	0.014431	0.0884638
Eastern Asia and South-eastern Asia	Urban	Kerosene	2030	0.000358755	0.00335088	0.0945759
Latin America & the Caribbean	Urban	Kerosene	2030	0.00233191	0.0110575	0.0407749
Northern America and Europe	Urban	Kerosene	2030	0.000308998	0.0103863	0.37058
Oceania excluding Australia and New Zealand	Urban	Kerosene	2030	0.0379793	0.148937	0.571303
Sub-Saharan Africa	Urban	Kerosene	2030	0.0115123	0.0266588	0.0759398
Western Asia and Northern Africa	Urban	Kerosene	2030	0.00143281	0.0133841	0.069092
Central Asia and Southern Asia	Urban	Gas	1990	0.308994	0.397247	0.482266
Eastern Asia and South-eastern Asia	Urban	Gas	1990	0.191565	0.511063	0.71568
Latin America & the Caribbean	Urban	Gas	1990	0.756301	0.817306	0.860979
Northern America and Europe	Urban	Gas	1990	0.376996	0.651825	0.863044
Oceania excluding Australia and New Zealand	Urban	Gas	1990	0.0995313	0.232845	0.461706
Sub-Saharan Africa	Urban	Gas	1990	0.0689501	0.0968074	0.14527
Western Asia and Northern Africa	Urban	Gas	1990	0.617895	0.778072	0.872272
Central Asia and Southern Asia	Urban	Gas	1991	0.330463	0.409179	0.49225
Eastern Asia and South-eastern Asia	Urban	Gas	1991	0.204473	0.506634	0.714476
Latin America & the Caribbean	Urban	Gas	1991	0.773769	0.828778	0.864571
Northern America and Europe	Urban	Gas	1991	0.422089	0.670474	0.8558
Oceania excluding Australia and New Zealand	Urban	Gas	1991	0.102757	0.243308	0.452881
Sub-Saharan Africa	Urban	Gas	1991	0.0711383	0.0964407	0.140528
Western Asia and Northern Africa	Urban	Gas	1991	0.634234	0.78924	0.871136
Central Asia and Southern Asia	Urban	Gas	1992	0.343331	0.427257	0.510147
Eastern Asia and South-eastern Asia	Urban	Gas	1992	0.244618	0.512094	0.712443
Latin America & the Caribbean	Urban	Gas	1992	0.787008	0.83729	0.87337
Northern America and Europe	Urban	Gas	1992	0.453447	0.680693	0.86213
Oceania excluding Australia and New Zealand	Urban	Gas	1992	0.117548	0.245332	0.442516
Sub-Saharan Africa	Urban	Gas	1992	0.0726959	0.0959891	0.133242
Western Asia and Northern Africa	Urban	Gas	1992	0.650068	0.799586	0.875303
Central Asia and Southern Asia	Urban	Gas	1993	0.367859	0.442254	0.515969
Eastern Asia and South-eastern Asia	Urban	Gas	1993	0.258566	0.515394	0.703322
Latin America & the Caribbean	Urban	Gas	1993	0.795385	0.846393	0.877324
Northern America and Europe	Urban	Gas	1993	0.482369	0.687754	0.851086
Oceania excluding Australia and New Zealand	Urban	Gas	1993	0.128492	0.254193	0.431854
Sub-Saharan Africa	Urban	Gas	1993	0.0758516	0.0967009	0.126194
Western Asia and Northern Africa	Urban	Gas	1993	0.673337	0.812156	0.876115
Central Asia and Southern Asia	Urban	Gas	1994	0.37762	0.456437	0.535865
Eastern Asia and South-eastern Asia	Urban	Gas	1994	0.282334	0.52191	0.703777
Latin America & the Caribbean	Urban	Gas	1994	0.804559	0.853222	0.883781
Northern America and Europe	Urban	Gas	1994	0.509765	0.701407	0.848839
Oceania excluding Australia and New Zealand	Urban	Gas	1994	0.137108	0.255611	0.440149
Sub-Saharan Africa	Urban	Gas	1994	0.0780253	0.0981034	0.125972
Western Asia and Northern Africa	Urban	Gas	1994	0.692778	0.823289	0.884315
Central Asia and Southern Asia	Urban	Gas	1995	0.393813	0.47465	0.550791
Eastern Asia and South-eastern Asia	Urban	Gas	1995	0.312686	0.531004	0.704361
Latin America & the Caribbean	Urban	Gas	1995	0.814074	0.861772	0.887664
Northern America and Europe	Urban	Gas	1995	0.557183	0.714342	0.853514
Oceania excluding Australia and New Zealand	Urban	Gas	1995	0.144042	0.259803	0.427526
Sub-Saharan Africa	Urban	Gas	1995	0.0796381	0.09812	0.120332
Western Asia and Northern Africa	Urban	Gas	1995	0.721655	0.832818	0.88727
Central Asia and Southern Asia	Urban	Gas	1996	0.406387	0.489264	0.569289
Eastern Asia and South-eastern Asia	Urban	Gas	1996	0.336669	0.526551	0.693979
Latin America & the Caribbean	Urban	Gas	1996	0.829747	0.869694	0.894316
Northern America and Europe	Urban	Gas	1996	0.585631	0.722369	0.843546
Oceania excluding Australia and New Zealand	Urban	Gas	1996	0.153997	0.269728	0.429333
Sub-Saharan Africa	Urban	Gas	1996	0.0809961	0.0994594	0.120127
Western Asia and Northern Africa	Urban	Gas	1996	0.737997	0.84577	0.893842
Central Asia and Southern Asia	Urban	Gas	1997	0.431557	0.504694	0.58535
Eastern Asia and South-eastern Asia	Urban	Gas	1997	0.345092	0.533947	0.703257
Latin America & the Caribbean	Urban	Gas	1997	0.835909	0.875084	0.899824
Northern America and Europe	Urban	Gas	1997	0.609603	0.737923	0.847127
Oceania excluding Australia and New Zealand	Urban	Gas	1997	0.155927	0.265385	0.420967
Sub-Saharan Africa	Urban	Gas	1997	0.083586	0.101122	0.119168
Western Asia and Northern Africa	Urban	Gas	1997	0.760553	0.854556	0.899944
Central Asia and Southern Asia	Urban	Gas	1998	0.447217	0.525369	0.595071
Eastern Asia and South-eastern Asia	Urban	Gas	1998	0.376024	0.53826	0.678327
Latin America & the Caribbean	Urban	Gas	1998	0.837646	0.881621	0.905972
Northern America and Europe	Urban	Gas	1998	0.642168	0.755505	0.843289
Oceania excluding Australia and New Zealand	Urban	Gas	1998	0.163372	0.271336	0.421654
Sub-Saharan Africa	Urban	Gas	1998	0.0859959	0.101867	0.119359
Western Asia and Northern Africa	Urban	Gas	1998	0.787592	0.863463	0.903749
Central Asia and Southern Asia	Urban	Gas	1999	0.46575	0.542903	0.621613
Eastern Asia and South-eastern Asia	Urban	Gas	1999	0.39351	0.546906	0.679993
Latin America & the Caribbean	Urban	Gas	1999	0.850886	0.888551	0.910339
Northern America and Europe	Urban	Gas	1999	0.655854	0.761533	0.849734
Oceania excluding Australia and New Zealand	Urban	Gas	1999	0.169237	0.273348	0.4204
Sub-Saharan Africa	Urban	Gas	1999	0.0902867	0.103419	0.119224
Western Asia and Northern Africa	Urban	Gas	1999	0.801717	0.873266	0.91052
Central Asia and Southern Asia	Urban	Gas	2000	0.480823	0.562049	0.638183
Eastern Asia and South-eastern Asia	Urban	Gas	2000	0.41001	0.548669	0.682307
Latin America & the Caribbean	Urban	Gas	2000	0.852355	0.893202	0.914597
Northern America and Europe	Urban	Gas	2000	0.682207	0.773344	0.852443
Oceania excluding Australia and New Zealand	Urban	Gas	2000	0.171184	0.278534	0.421199
Sub-Saharan Africa	Urban	Gas	2000	0.0923831	0.105083	0.120604
Western Asia and Northern Africa	Urban	Gas	2000	0.819532	0.883089	0.914803
Central Asia and Southern Asia	Urban	Gas	2001	0.495239	0.580306	0.647968
Eastern Asia and South-eastern Asia	Urban	Gas	2001	0.406904	0.560732	0.683285
Latin America & the Caribbean	Urban	Gas	2001	0.857681	0.898978	0.919115
Northern America and Europe	Urban	Gas	2001	0.686798	0.785597	0.862687
Oceania excluding Australia and New Zealand	Urban	Gas	2001	0.181571	0.279241	0.419943
Sub-Saharan Africa	Urban	Gas	2001	0.0924681	0.107344	0.122128
Western Asia and Northern Africa	Urban	Gas	2001	0.836246	0.890793	0.921986
Central Asia and Southern Asia	Urban	Gas	2002	0.51349	0.592716	0.672676
Eastern Asia and South-eastern Asia	Urban	Gas	2002	0.419139	0.56877	0.691243
Latin America & the Caribbean	Urban	Gas	2002	0.863292	0.903938	0.924813
Northern America and Europe	Urban	Gas	2002	0.699783	0.793629	0.857343
Oceania excluding Australia and New Zealand	Urban	Gas	2002	0.18263	0.278952	0.411047
Sub-Saharan Africa	Urban	Gas	2002	0.096125	0.108687	0.12136
Western Asia and Northern Africa	Urban	Gas	2002	0.852171	0.898257	0.926796
Central Asia and Southern Asia	Urban	Gas	2003	0.533159	0.609023	0.685921
Eastern Asia and South-eastern Asia	Urban	Gas	2003	0.445106	0.5776	0.706546
Latin America & the Caribbean	Urban	Gas	2003	0.867358	0.906156	0.925539
Northern America and Europe	Urban	Gas	2003	0.700357	0.800675	0.868441
Oceania excluding Australia and New Zealand	Urban	Gas	2003	0.190843	0.280024	0.428647
Sub-Saharan Africa	Urban	Gas	2003	0.0991644	0.110878	0.124765
Western Asia and Northern Africa	Urban	Gas	2003	0.863748	0.905826	0.932133
Central Asia and Southern Asia	Urban	Gas	2004	0.547488	0.624844	0.703987
Eastern Asia and South-eastern Asia	Urban	Gas	2004	0.462479	0.58421	0.714255
Latin America & the Caribbean	Urban	Gas	2004	0.875947	0.910372	0.930967
Northern America and Europe	Urban	Gas	2004	0.706007	0.807163	0.872393
Oceania excluding Australia and New Zealand	Urban	Gas	2004	0.186105	0.279532	0.405826
Sub-Saharan Africa	Urban	Gas	2004	0.101041	0.113442	0.127972
Western Asia and Northern Africa	Urban	Gas	2004	0.875601	0.912689	0.935549
Central Asia and Southern Asia	Urban	Gas	2005	0.56123	0.641118	0.715098
Eastern Asia and South-eastern Asia	Urban	Gas	2005	0.446213	0.59444	0.708626
Latin America & the Caribbean	Urban	Gas	2005	0.877566	0.913181	0.930822
Northern America and Europe	Urban	Gas	2005	0.715532	0.809445	0.871943
Oceania excluding Australia and New Zealand	Urban	Gas	2005	0.197547	0.284211	0.40217
Sub-Saharan Africa	Urban	Gas	2005	0.103276	0.116003	0.12953
Western Asia and Northern Africa	Urban	Gas	2005	0.886608	0.918047	0.940776
Central Asia and Southern Asia	Urban	Gas	2006	0.576321	0.652275	0.732222
Eastern Asia and South-eastern Asia	Urban	Gas	2006	0.476271	0.602923	0.731372
Latin America & the Caribbean	Urban	Gas	2006	0.877699	0.915003	0.932685
Northern America and Europe	Urban	Gas	2006	0.713385	0.808909	0.876173
Oceania excluding Australia and New Zealand	Urban	Gas	2006	0.203276	0.286336	0.400633
Sub-Saharan Africa	Urban	Gas	2006	0.105462	0.118082	0.131624
Western Asia and Northern Africa	Urban	Gas	2006	0.889897	0.924653	0.944772
Central Asia and Southern Asia	Urban	Gas	2007	0.591172	0.669085	0.746302
Eastern Asia and South-eastern Asia	Urban	Gas	2007	0.478673	0.617422	0.736623
Latin America & the Caribbean	Urban	Gas	2007	0.880642	0.916972	0.934119
Northern America and Europe	Urban	Gas	2007	0.706105	0.812002	0.882778
Oceania excluding Australia and New Zealand	Urban	Gas	2007	0.204072	0.289262	0.405048
Sub-Saharan Africa	Urban	Gas	2007	0.108143	0.12078	0.134286
Western Asia and Northern Africa	Urban	Gas	2007	0.901216	0.929482	0.949779
Central Asia and Southern Asia	Urban	Gas	2008	0.596674	0.682218	0.754042
Eastern Asia and South-eastern Asia	Urban	Gas	2008	0.48979	0.622444	0.745545
[truncated: 4,628 more rows]

## Sheet: Fuels (Population)
region	area	fuel	year	population_lower95	population_median	population_upper95
[truncated: 5,904 more rows]
