# Supplementary material for: What fuels the fire? Cooking fuel estimates at global, regional and country level for 1990-2030
Source: Research Square preprint supplement (doi:10.21203/rs.3.rs-251806/v1), 2021-02-17
Supplement: Supplementary file 3 [file a2b91097480a94f5e8f50793.xlsx]

## Sheet: Readme
	Estimates of fuel use in each WHO region from "What fuels the fire? Cooking fuel estimates at global, regional and country level for 1990-2030".
	Oliver Stoner, Jessica Lewis, Itzel Lucio Martínez, Sophie Gumy, Theo Economou and Heather Adair-Rohani
	Contact: householdenergy@who.int
	Copyright WHO 2021 under CC BY 3.0 IGO
	Clean (%)
	Percentage of the population mainly using clean fuels for cooking (assuming 100% clean fuel use in high-income countries).
	Clean (Population)
	Number of people mainly using clean fuels for cooking (assuming 100% clean fuel use in high-income countries).
	Polluting (%)
	Percentage of the population mainly using polluting fuels for cooking (assuming 0% polluting fuel use in high-income countries).
	Polluting (Population)
	Number of people mainly polluting clean fuels for cooking (assuming 0% polluting fuel use in high-income countries).
	Fuels (%)
	Percentage of the population mainly using each fuel type for cooking (excluding high-income countries).
	Population
	Number of people mainly using each fuel type for cooking (excluding high-income countries).
	Estimate Types
	Median: Central estimates of fuel use (50% quantiles of posterior predictive distributions).
	Lower95 and Upper95: Lower and upper bounds, respectively, of 95% credible/confidence intervals (2.5% and 97.5% quantiles of posterior predictive distributions).
	Aggregate Categories
	Biomass (unprocessed/raw biomass) includes wood, crop residues, and dung.
	Gas (gaseous fuels) includes liquid petroleum gas (LPG), natural gas, and biogas.
	Data Sources
	Household Surveys: World Health Organization Household Energy Database (March 2020 version)
	Statistical Model: https://rss.onlinelibrary.wiley.com/doi/full/10.1111/rssc.12428
	Population Estimates: United Nations World Urbanization Prospects - Population Division (2018 revision)
	Income Classification: World Bank Income Country and Lending Groups - Country Classification (2019 fiscal year)
	Regional Classification
	DZA	Algeria	Africa
	AGO	Angola	Africa
	BEN	Benin	Africa
	BWA	Botswana	Africa
	BFA	Burkina Faso	Africa
	BDI	Burundi	Africa
	CPV	Cabo Verde	Africa
	CMR	Cameroon	Africa
	CAF	Central African Republic	Africa
	TCD	Chad	Africa
	COM	Comoros	Africa
	COG	Congo	Africa
	CIV	Côte d'Ivoire	Africa
	COD	Democratic Republic of the Congo	Africa
	GNQ	Equatorial Guinea	Africa
	ERI	Eritrea	Africa
	ETH	Ethiopia	Africa
	GAB	Gabon	Africa
	GMB	Gambia	Africa
	GHA	Ghana	Africa
	GIN	Guinea	Africa
	GNB	Guinea-Bissau	Africa
	KEN	Kenya	Africa
	LSO	Lesotho	Africa
	LBR	Liberia	Africa
	MDG	Madagascar	Africa
	MWI	Malawi	Africa
	MLI	Mali	Africa
	MRT	Mauritania	Africa
	MUS	Mauritius	Africa
	MOZ	Mozambique	Africa
	NAM	Namibia	Africa
	NER	Niger	Africa
	NGA	Nigeria	Africa
	RWA	Rwanda	Africa
	STP	Sao Tome And Principe	Africa
	SEN	Senegal	Africa
	SYC	Seychelles	Africa
	SLE	Sierra Leone	Africa
	ZAF	South Africa	Africa
	SSD	South Sudan	Africa
	SWZ	Eswatini	Africa
	TGO	Togo	Africa
	UGA	Uganda	Africa
	TZA	Tanzania, United Republic of	Africa
	ZMB	Zambia	Africa
	ZWE	Zimbabwe	Africa
	ATG	Antigua And Barbuda	Americas
	ARG	Argentina	Americas
	BHS	Bahamas	Americas
	BRB	Barbados	Americas
	BLZ	Belize	Americas
	BOL	Bolivia (Plurinational State of)	Americas
	BRA	Brazil	Americas
	CAN	Canada	Americas
	CHL	Chile	Americas
	COL	Colombia	Americas
	CRI	Costa Rica	Americas
	CUB	Cuba	Americas
	DMA	Dominica	Americas
	DOM	Dominican Republic	Americas
	ECU	Ecuador	Americas
	SLV	El Salvador	Americas
	GRD	Grenada	Americas
	GTM	Guatemala	Americas
	GUY	Guyana	Americas
	HTI	Haiti	Americas
	HND	Honduras	Americas
	JAM	Jamaica	Americas
	MEX	Mexico	Americas
	NIC	Nicaragua	Americas
	PAN	Panama	Americas
	PRY	Paraguay	Americas
	PER	Peru	Americas
	KNA	Saint Kitts and Nevis	Americas
	LCA	Saint Lucia	Americas
	VCT	Saint Vincent and the Grenadines	Americas
	SUR	Suriname	Americas
	TTO	Trinidad and Tobago	Americas
	USA	United States of America	Americas
	URY	Uruguay	Americas
	VEN	Venezuela (Bolivarian Republic of)	Americas
	AFG	Afghanistan	Eastern Mediterranean
	BHR	Bahrain	Eastern Mediterranean
	DJI	Djibouti	Eastern Mediterranean
	EGY	Egypt	Eastern Mediterranean
	IRN	Iran (Islamic Republic of)	Eastern Mediterranean
	IRQ	Iraq	Eastern Mediterranean
	ISR	Israel	Eastern Mediterranean
	JOR	Jordan	Eastern Mediterranean
	KWT	Kuwait	Eastern Mediterranean
	LBN	Lebanon	Eastern Mediterranean
	LBY	Libya	Eastern Mediterranean
	MAR	Morocco	Eastern Mediterranean
	OMN	Oman	Eastern Mediterranean
	PAK	Pakistan	Eastern Mediterranean
	QAT	Qatar	Eastern Mediterranean
	SAU	Saudi Arabia	Eastern Mediterranean
	SOM	Somalia	Eastern Mediterranean
	SDN	Sudan	Eastern Mediterranean
	SYR	Syrian Arab Republic	Eastern Mediterranean
	TUN	Tunisia	Eastern Mediterranean
	ARE	United Arab Emirates	Eastern Mediterranean
	YEM	Yemen	Eastern Mediterranean
	ALB	Albania	Europe
	AND	Andorra	Europe
	ARM	Armenia	Europe
	AUT	Austria	Europe
	AZE	Azerbaijan	Europe
	BLR	Belarus	Europe
	BEL	Belgium	Europe
	BIH	Bosnia and Herzegovina	Europe
	BGR	Bulgaria	Europe
	HRV	Croatia	Europe
	CYP	Cyprus	Europe
	CZE	Czechia	Europe
	DNK	Denmark	Europe
	EST	Estonia	Europe
	FIN	Finland	Europe
	FRA	France	Europe
	GEO	Georgia	Europe
	DEU	Germany	Europe
	GRC	Greece	Europe
	HUN	Hungary	Europe
	ISL	Iceland	Europe
	IRL	Ireland	Europe
	ITA	Italy	Europe
	KAZ	Kazakhstan	Europe
	KGZ	Kyrgyzstan	Europe
	LVA	Latvia	Europe
	LTU	Lithuania	Europe
	LUX	Luxembourg	Europe
	MLT	Malta	Europe
	MCO	Monaco	Europe
	MNE	Montenegro	Europe
	NLD	Netherlands	Europe
	NOR	Norway	Europe
	POL	Poland	Europe
	PRT	Portugal	Europe
	MDA	Moldova, Republic of	Europe
	ROU	Romania	Europe
	RUS	Russian Federation	Europe
	SMR	San Marino	Europe
	SRB	Serbia	Europe
	SVK	Slovakia	Europe
	SVN	Slovenia	Europe
	ESP	Spain	Europe
	SWE	Sweden	Europe
	CHE	Switzerland	Europe
	TJK	Tajikistan	Europe
	MKD	North Macedonia	Europe
	TUR	Turkey	Europe
	TKM	Turkmenistan	Europe
	UKR	Ukraine	Europe
	GBR	United Kingdom of Great Britain and Northern Ireland	Europe
	UZB	Uzbekistan	Europe
	BGD	Bangladesh	South-East Asia
	BTN	Bhutan	South-East Asia
	PRK	Democratic Peoples Republic of Korea	South-East Asia
	IND	India	South-East Asia
	IDN	Indonesia	South-East Asia
	MDV	Maldives	South-East Asia
	MMR	Myanmar	South-East Asia
	NPL	Nepal	South-East Asia
	LKA	Sri Lanka	South-East Asia
	THA	Thailand	South-East Asia
	TLS	Timor-Leste	South-East Asia
	AUS	Australia	Western Pacific
	BRN	Brunei Darussalam	Western Pacific
	KHM	Cambodia	Western Pacific
	CHN	China	Western Pacific
	COK	Cook Islands	Western Pacific
	FJI	Fiji	Western Pacific
	JPN	Japan	Western Pacific
	KIR	Kiribati	Western Pacific
	LAO	Lao People's Democratic Republic	Western Pacific
	MYS	Malaysia	Western Pacific
	MHL	Marshall Islands	Western Pacific
	FSM	Micronesia, Federated States of	Western Pacific
	MNG	Mongolia	Western Pacific
	NRU	Nauru	Western Pacific
	NZL	New Zealand	Western Pacific
	NIU	Niue	Western Pacific
	PLW	Palau	Western Pacific
	PNG	Papua New Guinea	Western Pacific
	PHL	Philippines	Western Pacific
	KOR	Korea, Republic of	Western Pacific
	WSM	Samoa	Western Pacific
	SGP	Singapore	Western Pacific
	SLB	Solomon Islands	Western Pacific
	TON	Tonga	Western Pacific
	TUV	Tuvalu	Western Pacific
	VUT	Vanuatu	Western Pacific
	VNM	Viet Nam	Western Pacific

## Sheet: Clean (%)
region	area	year	percent_lower95	percent_median	percent_upper95
Afr	Urban	1990	0.26497	0.320092	0.394976
Amr	Urban	1990	0.893319	0.92706	0.949448
Emr	Urban	1990	0.648875	0.777244	0.869198
Eur	Urban	1990	0.933194	0.970585	0.986104
Sear	Urban	1990	0.207129	0.280495	0.364158
Wpr	Urban	1990	0.447012	0.732666	0.909601
Afr	Urban	1991	0.266882	0.31986	0.389173
Amr	Urban	1991	0.900792	0.931376	0.951259
Emr	Urban	1991	0.668696	0.783996	0.867732
Eur	Urban	1991	0.93713	0.972409	0.986686
Sear	Urban	1991	0.219133	0.290178	0.36757
Wpr	Urban	1991	0.4565	0.730932	0.906604
Afr	Urban	1992	0.27063	0.318761	0.380901
Amr	Urban	1992	0.907304	0.935027	0.953525
Emr	Urban	1992	0.673351	0.79175	0.864784
Eur	Urban	1992	0.940477	0.974324	0.987236
Sear	Urban	1992	0.233801	0.301748	0.379251
Wpr	Urban	1992	0.477849	0.730536	0.899621
Afr	Urban	1993	0.27414	0.317703	0.373822
Amr	Urban	1993	0.911284	0.938737	0.95487
Emr	Urban	1993	0.697298	0.797355	0.864717
Eur	Urban	1993	0.945756	0.975846	0.987752
Sear	Urban	1993	0.24313	0.312621	0.38763
Wpr	Urban	1993	0.491497	0.730071	0.895494
Afr	Urban	1994	0.274949	0.316572	0.364545
Amr	Urban	1994	0.916918	0.941671	0.956916
Emr	Urban	1994	0.71596	0.804783	0.863784
Eur	Urban	1994	0.94963	0.977499	0.98904
Sear	Urban	1994	0.252911	0.325171	0.399861
Wpr	Urban	1994	0.509527	0.730572	0.893807
Afr	Urban	1995	0.277722	0.315817	0.361877
Amr	Urban	1995	0.918386	0.944391	0.959
Emr	Urban	1995	0.729333	0.810877	0.86478
Eur	Urban	1995	0.954444	0.979138	0.989145
Sear	Urban	1995	0.265757	0.337121	0.413309
Wpr	Urban	1995	0.533492	0.733048	0.890431
Afr	Urban	1996	0.279949	0.315806	0.357832
Amr	Urban	1996	0.925496	0.947597	0.960764
Emr	Urban	1996	0.741366	0.817175	0.867293
Eur	Urban	1996	0.958008	0.980429	0.989763
Sear	Urban	1996	0.276971	0.349308	0.428135
Wpr	Urban	1996	0.545492	0.732742	0.880865
Afr	Urban	1997	0.281828	0.31458	0.352934
Amr	Urban	1997	0.927639	0.950251	0.962545
Emr	Urban	1997	0.756438	0.823778	0.868959
Eur	Urban	1997	0.960515	0.982059	0.990112
Sear	Urban	1997	0.289828	0.362285	0.442447
Wpr	Urban	1997	0.561903	0.735875	0.885258
Afr	Urban	1998	0.283447	0.314668	0.349082
Amr	Urban	1998	0.930349	0.952307	0.964419
Emr	Urban	1998	0.770639	0.82898	0.871827
Eur	Urban	1998	0.964798	0.983066	0.990602
Sear	Urban	1998	0.304148	0.379736	0.454645
Wpr	Urban	1998	0.583822	0.739696	0.876255
Afr	Urban	1999	0.283757	0.314243	0.345575
Amr	Urban	1999	0.933545	0.955271	0.966205
Emr	Urban	1999	0.777767	0.835235	0.874494
Eur	Urban	1999	0.966274	0.984308	0.991207
Sear	Urban	1999	0.321018	0.393771	0.471748
Wpr	Urban	1999	0.597138	0.742582	0.878147
Afr	Urban	2000	0.285239	0.314314	0.343899
Amr	Urban	2000	0.935385	0.957253	0.967646
Emr	Urban	2000	0.791785	0.842241	0.877886
Eur	Urban	2000	0.969819	0.985246	0.991513
Sear	Urban	2000	0.334729	0.411394	0.487231
Wpr	Urban	2000	0.608164	0.747243	0.879109
Afr	Urban	2001	0.286747	0.3145	0.341926
Amr	Urban	2001	0.938092	0.959104	0.969051
Emr	Urban	2001	0.801709	0.848421	0.882539
Eur	Urban	2001	0.971363	0.986192	0.992055
Sear	Urban	2001	0.350605	0.428745	0.505132
Wpr	Urban	2001	0.613749	0.753422	0.874821
Afr	Urban	2002	0.288428	0.314572	0.340954
Amr	Urban	2002	0.939918	0.960784	0.97061
Emr	Urban	2002	0.811667	0.854617	0.886841
Eur	Urban	2002	0.971364	0.986905	0.992297
Sear	Urban	2002	0.37175	0.447977	0.524292
Wpr	Urban	2002	0.624952	0.757611	0.877772
Afr	Urban	2003	0.288779	0.314552	0.339442
Amr	Urban	2003	0.941691	0.961724	0.971481
Emr	Urban	2003	0.819234	0.861182	0.891575
Eur	Urban	2003	0.970932	0.987561	0.992742
Sear	Urban	2003	0.387677	0.466784	0.544114
Wpr	Urban	2003	0.631642	0.762362	0.884596
Afr	Urban	2004	0.291733	0.315396	0.339641
Amr	Urban	2004	0.943911	0.963229	0.972538
Emr	Urban	2004	0.828457	0.867602	0.897818
Eur	Urban	2004	0.971553	0.988054	0.993045
Sear	Urban	2004	0.40464	0.486731	0.565241
Wpr	Urban	2004	0.640185	0.770231	0.894461
Afr	Urban	2005	0.292138	0.316187	0.338805
Amr	Urban	2005	0.944503	0.963999	0.973195
Emr	Urban	2005	0.838605	0.875489	0.902677
Eur	Urban	2005	0.971361	0.988484	0.993234
Sear	Urban	2005	0.421996	0.506774	0.586101
Wpr	Urban	2005	0.64355	0.776454	0.890249
Afr	Urban	2006	0.293779	0.316664	0.337892
Amr	Urban	2006	0.944882	0.964919	0.973765
Emr	Urban	2006	0.845497	0.88281	0.908822
Eur	Urban	2006	0.968652	0.988499	0.993476
Sear	Urban	2006	0.450647	0.531844	0.609389
Wpr	Urban	2006	0.647245	0.781646	0.89656
Afr	Urban	2007	0.296258	0.317396	0.338393
Amr	Urban	2007	0.946453	0.965552	0.974156
Emr	Urban	2007	0.858172	0.891977	0.916667
Eur	Urban	2007	0.967523	0.9888	0.993567
Sear	Urban	2007	0.474573	0.558474	0.639315
Wpr	Urban	2007	0.654838	0.789637	0.899524
Afr	Urban	2008	0.296419	0.318125	0.337837
Amr	Urban	2008	0.947638	0.966231	0.974677
Emr	Urban	2008	0.865371	0.898486	0.921879
Eur	Urban	2008	0.964411	0.988538	0.993782
Sear	Urban	2008	0.502191	0.586374	0.6645
Wpr	Urban	2008	0.657313	0.794396	0.905694
Afr	Urban	2009	0.297152	0.318882	0.338917
Amr	Urban	2009	0.948781	0.966355	0.974864
Emr	Urban	2009	0.871443	0.90379	0.926589
Eur	Urban	2009	0.959372	0.988189	0.993835
Sear	Urban	2009	0.523873	0.612944	0.688926
Wpr	Urban	2009	0.666941	0.800827	0.905996
Afr	Urban	2010	0.299893	0.320465	0.340465
Amr	Urban	2010	0.949601	0.96665	0.97493
Emr	Urban	2010	0.877104	0.90894	0.931812
Eur	Urban	2010	0.955149	0.987841	0.9939
Sear	Urban	2010	0.55003	0.638379	0.714396
Wpr	Urban	2010	0.669802	0.808092	0.913533
Afr	Urban	2011	0.30082	0.32191	0.341874
Amr	Urban	2011	0.949254	0.966755	0.975204
Emr	Urban	2011	0.880482	0.912869	0.933973
Eur	Urban	2011	0.952181	0.986973	0.993907
Sear	Urban	2011	0.576818	0.664043	0.738948
Wpr	Urban	2011	0.665114	0.81364	0.918011
Afr	Urban	2012	0.304158	0.32435	0.344256
Amr	Urban	2012	0.95029	0.966598	0.975166
Emr	Urban	2012	0.881692	0.915946	0.93741
Eur	Urban	2012	0.942896	0.986262	0.994125
Sear	Urban	2012	0.59738	0.687162	0.763751
Wpr	Urban	2012	0.662475	0.818829	0.927608
Afr	Urban	2013	0.307416	0.327577	0.347803
Amr	Urban	2013	0.950254	0.966574	0.975277
Emr	Urban	2013	0.885604	0.918011	0.93941
Eur	Urban	2013	0.937201	0.985193	0.9939
Sear	Urban	2013	0.617579	0.708123	0.782
Wpr	Urban	2013	0.667332	0.82459	0.930843
Afr	Urban	2014	0.311396	0.332188	0.354434
Amr	Urban	2014	0.949558	0.966424	0.974997
Emr	Urban	2014	0.885426	0.920101	0.940747
Eur	Urban	2014	0.930258	0.983681	0.993867
Sear	Urban	2014	0.641753	0.729205	0.798368
Wpr	Urban	2014	0.658641	0.829847	0.937553
Afr	Urban	2015	0.316675	0.337955	0.360916
Amr	Urban	2015	0.948769	0.966179	0.9754
Emr	Urban	2015	0.88455	0.920849	0.942403
Eur	Urban	2015	0.92005	0.982575	0.993736
Sear	Urban	2015	0.655584	0.747802	0.817985
Wpr	Urban	2015	0.648343	0.833346	0.938447
Afr	Urban	2016	0.322511	0.345697	0.369941
Amr	Urban	2016	0.94791	0.965753	0.974782
Emr	Urban	2016	0.883307	0.92142	0.944522
Eur	Urban	2016	0.9148	0.980645	0.993939
Sear	Urban	2016	0.658672	0.764222	0.83578
Wpr	Urban	2016	0.633878	0.836249	0.947802
Afr	Urban	2017	0.327334	0.35271	0.380263
Amr	Urban	2017	0.948383	0.965466	0.975221
Emr	Urban	2017	0.880412	0.921595	0.946033
Eur	Urban	2017	0.90137	0.979301	0.99344
Sear	Urban	2017	0.67454	0.77922	0.85136
Wpr	Urban	2017	0.613882	0.842153	0.952875
Afr	Urban	2018	0.334039	0.362199	0.391195
Amr	Urban	2018	0.946359	0.965138	0.974999
Emr	Urban	2018	0.87849	0.92145	0.946322
Eur	Urban	2018	0.887119	0.977251	0.993456
Sear	Urban	2018	0.67996	0.794719	0.869769
Wpr	Urban	2018	0.602449	0.845811	0.957442
Afr	Urban	2019	0.338776	0.370091	0.40435
Amr	Urban	2019	0.943327	0.964316	0.97549
Emr	Urban	2019	0.872255	0.92045	0.947814
Eur	Urban	2019	0.876983	0.974866	0.993231
Sear	Urban	2019	0.684179	0.807481	0.882175
Wpr	Urban	2019	0.581013	0.848796	0.962049
Afr	Urban	2020	0.341266	0.377491	0.416155
Amr	Urban	2020	0.941584	0.963434	0.974914
Emr	Urban	2020	0.867434	0.919807	0.948783
Eur	Urban	2020	0.869355	0.972349	0.993
Sear	Urban	2020	0.687023	0.819195	0.89526
Wpr	Urban	2020	0.558849	0.853098	0.965682
Afr	Urban	2021	0.343448	0.382333	0.423547
Amr	Urban	2021	0.938431	0.96217	0.974981
Emr	Urban	2021	0.85968	0.918457	0.949966
Eur	Urban	2021	0.860571	0.970057	0.992622
Sear	Urban	2021	0.684352	0.830559	0.904036
Wpr	Urban	2021	0.529548	0.856322	0.96939
Afr	Urban	2022	0.34407	0.385855	0.432982
Amr	Urban	2022	0.934878	0.961119	0.975532
Emr	Urban	2022	0.851928	0.91709	0.95072
Eur	Urban	2022	0.852716	0.966237	0.992042
Sear	Urban	2022	0.688031	0.84005	0.914524
Wpr	Urban	2022	0.504137	0.858793	0.970411
Afr	Urban	2023	0.342151	0.387857	0.437442
Amr	Urban	2023	0.931171	0.959307	0.974641
Emr	Urban	2023	0.841109	0.915213	0.950898
Eur	Urban	2023	0.841848	0.962362	0.992037
Sear	Urban	2023	0.688041	0.849114	0.923035
Wpr	Urban	2023	0.475452	0.86244	0.97279
Afr	Urban	2024	0.339542	0.388904	0.443561
Amr	Urban	2024	0.925387	0.957992	0.974939
Emr	Urban	2024	0.82907	0.913001	0.952195
Eur	Urban	2024	0.838255	0.958805	0.991775
Sear	Urban	2024	0.683459	0.857674	0.929475
Wpr	Urban	2024	0.469989	0.865354	0.974957
Afr	Urban	2025	0.334906	0.3882	0.446653
Amr	Urban	2025	0.91911	0.956084	0.974282
Emr	Urban	2025	0.820519	0.911005	0.952072
Eur	Urban	2025	0.834479	0.954563	0.991187
Sear	Urban	2025	0.680764	0.865988	0.935334
Wpr	Urban	2025	0.432258	0.867837	0.976527
Afr	Urban	2026	0.330359	0.386525	0.44925
Amr	Urban	2026	0.913561	0.95408	0.974525
Emr	Urban	2026	0.811299	0.908866	0.952014
Eur	Urban	2026	0.82949	0.950304	0.990759
Sear	Urban	2026	0.679429	0.872625	0.942368
Wpr	Urban	2026	0.419922	0.865936	0.976781
Afr	Urban	2027	0.324683	0.383885	0.450101
Amr	Urban	2027	0.904659	0.952266	0.973989
Emr	Urban	2027	0.801832	0.906609	0.951312
Eur	Urban	2027	0.826906	0.94562	0.98983
Sear	Urban	2027	0.672058	0.878167	0.945851
Wpr	Urban	2027	0.401689	0.87077	0.979132
Afr	Urban	2028	0.319584	0.381271	0.450681
Amr	Urban	2028	0.898907	0.949928	0.973096
Emr	Urban	2028	0.79412	0.903412	0.9519
Eur	Urban	2028	0.823943	0.93997	0.989605
Sear	Urban	2028	0.666894	0.884666	0.950886
Wpr	Urban	2028	0.378905	0.872531	0.979497
Afr	Urban	2029	0.315107	0.378342	0.452239
Amr	Urban	2029	0.891291	0.946925	0.972547
Emr	Urban	2029	0.777487	0.899788	0.952714
Eur	Urban	2029	0.820844	0.934054	0.989207
Sear	Urban	2029	0.667788	0.888781	0.954471
Wpr	Urban	2029	0.357712	0.871288	0.98138
Afr	Urban	2030	0.309442	0.373847	0.453711
Amr	Urban	2030	0.882463	0.944933	0.97211
Emr	Urban	2030	0.7702	0.894989	0.95111
Eur	Urban	2030	0.816665	0.929135	0.988248
Sear	Urban	2030	0.660873	0.894496	0.958586
Wpr	Urban	2030	0.339851	0.873767	0.982071
Afr	Rural	1990	0.0427374	0.0665674	0.108827
Amr	Rural	1990	0.503808	0.555565	0.616124
Emr	Rural	1990	0.207345	0.31019	0.411973
Eur	Rural	1990	0.75773	0.829277	0.880381
Sear	Rural	1990	0.0210919	0.0376954	0.0658052
Wpr	Rural	1990	0.065172	0.305926	0.744533
Afr	Rural	1991	0.0432216	0.064248	0.101507
Amr	Rural	1991	0.508753	0.561009	0.617926
Emr	Rural	1991	0.216107	0.315498	0.407029
Eur	Rural	1991	0.764083	0.831359	0.881306
Sear	Rural	1991	0.0223457	0.0393031	0.0665977
Wpr	Rural	1991	0.0675931	0.294965	0.713058
Afr	Rural	1992	0.042995	0.0624157	0.0958276
Amr	Rural	1992	0.51808	0.566181	0.619105
Emr	Rural	1992	0.227016	0.319874	0.407662
Eur	Rural	1992	0.769775	0.834876	0.88231
Sear	Rural	1992	0.0247321	0.0419734	0.0702387
Wpr	Rural	1992	0.0734444	0.297796	0.675467
Afr	Rural	1993	0.0426536	0.0609073	0.0909621
Amr	Rural	1993	0.524123	0.573529	0.622691
Emr	Rural	1993	0.241303	0.325607	0.40447
Eur	Rural	1993	0.776266	0.837273	0.882276
Sear	Rural	1993	0.0270829	0.0447683	0.0718888
Wpr	Rural	1993	0.079201	0.295963	0.64983
Afr	Rural	1994	0.0436209	0.0595517	0.0861446
Amr	Rural	1994	0.529229	0.579081	0.628328
Emr	Rural	1994	0.25265	0.331459	0.403484
Eur	Rural	1994	0.780034	0.840415	0.88388
Sear	Rural	1994	0.0293245	0.0481701	0.0761531
Wpr	Rural	1994	0.0806188	0.287004	0.617501
Afr	Rural	1995	0.0439884	0.0582768	0.0831572
Amr	Rural	1995	0.537666	0.58548	0.632889
Emr	Rural	1995	0.263731	0.337354	0.404086
Eur	Rural	1995	0.784639	0.843953	0.884843
Sear	Rural	1995	0.0314421	0.0511172	0.0812129
Wpr	Rural	1995	0.0893286	0.280528	0.590472
Afr	Rural	1996	0.0431434	0.0571982	0.0797763
Amr	Rural	1996	0.544235	0.592487	0.639087
Emr	Rural	1996	0.279415	0.346679	0.407994
Eur	Rural	1996	0.793493	0.846992	0.88634
Sear	Rural	1996	0.0337618	0.0543343	0.0859269
Wpr	Rural	1996	0.0952405	0.277218	0.57855
Afr	Rural	1997	0.0444567	0.0562187	0.075674
Amr	Rural	1997	0.55253	0.598667	0.64447
Emr	Rural	1997	0.294663	0.355739	0.411833
Eur	Rural	1997	0.800029	0.851063	0.889214
Sear	Rural	1997	0.0372588	0.059279	0.0920437
Wpr	Rural	1997	0.099413	0.275451	0.560024
Afr	Rural	1998	0.0444778	0.055489	0.0725139
Amr	Rural	1998	0.558006	0.60498	0.65119
Emr	Rural	1998	0.309873	0.366263	0.419009
Eur	Rural	1998	0.807744	0.85578	0.891012
Sear	Rural	1998	0.0397361	0.0634776	0.0963986
Wpr	Rural	1998	0.109308	0.269017	0.534831
Afr	Rural	1999	0.0447349	0.0549976	0.0714033
Amr	Rural	1999	0.566512	0.610398	0.655118
Emr	Rural	1999	0.32818	0.377499	0.426454
Eur	Rural	1999	0.813147	0.86063	0.895326
Sear	Rural	1999	0.0432145	0.0686746	0.104627
Wpr	Rural	1999	0.108783	0.265525	0.520742
Afr	Rural	2000	0.0447856	0.0546776	0.0701109
Amr	Rural	2000	0.573825	0.617698	0.660433
Emr	Rural	2000	0.342824	0.387905	0.432231
Eur	Rural	2000	0.8225	0.866203	0.8973
Sear	Rural	2000	0.046689	0.073527	0.11096
Wpr	Rural	2000	0.114496	0.263296	0.513746
Afr	Rural	2001	0.0456791	0.0547911	0.0681974
Amr	Rural	2001	0.581767	0.624909	0.668134
Emr	Rural	2001	0.356124	0.397	0.440166
Eur	Rural	2001	0.828361	0.871944	0.900629
Sear	Rural	2001	0.0502225	0.0781132	0.117464
Wpr	Rural	2001	0.114033	0.261287	0.48998
Afr	Rural	2002	0.045764	0.0547957	0.0679202
Amr	Rural	2002	0.588515	0.63284	0.674691
Emr	Rural	2002	0.368379	0.406698	0.448747
Eur	Rural	2002	0.834353	0.877501	0.903736
Sear	Rural	2002	0.0539936	0.0833781	0.126111
Wpr	Rural	2002	0.120249	0.262152	0.503944
Afr	Rural	2003	0.0460472	0.0550284	0.0673831
Amr	Rural	2003	0.598112	0.639745	0.680994
Emr	Rural	2003	0.377331	0.414076	0.454755
Eur	Rural	2003	0.842522	0.883155	0.907535
Sear	Rural	2003	0.0566527	0.0888329	0.132625
Wpr	Rural	2003	0.121121	0.258253	0.475935
Afr	Rural	2004	0.0464619	0.0551863	0.0672805
Amr	Rural	2004	0.603537	0.645782	0.68564
Emr	Rural	2004	0.386325	0.421267	0.460247
Eur	Rural	2004	0.845774	0.887866	0.911329
Sear	Rural	2004	0.0624492	0.0941573	0.138204
Wpr	Rural	2004	0.125969	0.263129	0.47313
Afr	Rural	2005	0.0469972	0.055659	0.0679891
Amr	Rural	2005	0.611651	0.652737	0.693052
Emr	Rural	2005	0.392422	0.427592	0.46756
Eur	Rural	2005	0.851678	0.891934	0.914958
Sear	Rural	2005	0.0676997	0.100536	0.147905
Wpr	Rural	2005	0.131106	0.264887	0.493435
Afr	Rural	2006	0.0470065	0.0557964	0.0674705
Amr	Rural	2006	0.620259	0.659714	0.698841
Emr	Rural	2006	0.400241	0.434121	0.474815
Eur	Rural	2006	0.852057	0.895188	0.91767
Sear	Rural	2006	0.0725182	0.107652	0.159176
Wpr	Rural	2006	0.130206	0.268831	0.479436
Afr	Rural	2007	0.0473452	0.0562092	0.0675387
Amr	Rural	2007	0.625527	0.665143	0.703198
Emr	Rural	2007	0.40721	0.439566	0.481671
Eur	Rural	2007	0.854467	0.89773	0.920931
Sear	Rural	2007	0.080573	0.116692	0.167062
Wpr	Rural	2007	0.132053	0.27192	0.487206
Afr	Rural	2008	0.0479979	0.0564174	0.0667913
Amr	Rural	2008	0.634809	0.671985	0.707282
Emr	Rural	2008	0.412143	0.446184	0.488058
Eur	Rural	2008	0.849314	0.898825	0.92257
Sear	Rural	2008	0.0873638	0.125737	0.175774
Wpr	Rural	2008	0.134063	0.278933	0.493039
Afr	Rural	2009	0.0483869	0.0567637	0.0677244
Amr	Rural	2009	0.640834	0.677314	0.712664
Emr	Rural	2009	0.419071	0.452409	0.495496
Eur	Rural	2009	0.845828	0.899987	0.924951
Sear	Rural	2009	0.0947928	0.135635	0.191612
Wpr	Rural	2009	0.132672	0.285272	0.507701
Afr	Rural	2010	0.0483247	0.0569336	0.0681293
Amr	Rural	2010	0.645337	0.683357	0.71743
Emr	Rural	2010	0.424067	0.458493	0.503258
Eur	Rural	2010	0.844205	0.899941	0.925945
Sear	Rural	2010	0.104893	0.148345	0.206138
Wpr	Rural	2010	0.141852	0.295875	0.51017
Afr	Rural	2011	0.0489783	0.0573164	0.068614
Amr	Rural	2011	0.653211	0.689479	0.721808
Emr	Rural	2011	0.427921	0.465946	0.515949
Eur	Rural	2011	0.841506	0.899418	0.927853
Sear	Rural	2011	0.116797	0.161138	0.223698
Wpr	Rural	2011	0.141881	0.305891	0.521654
Afr	Rural	2012	0.0483625	0.0574986	0.0694632
Amr	Rural	2012	0.660728	0.695429	0.728155
Emr	Rural	2012	0.433198	0.471969	0.519848
Eur	Rural	2012	0.831503	0.898634	0.927849
Sear	Rural	2012	0.126397	0.177176	0.240052
Wpr	Rural	2012	0.145219	0.316316	0.538519
Afr	Rural	2013	0.0490946	0.0574567	0.0700533
Amr	Rural	2013	0.664956	0.702346	0.733704
Emr	Rural	2013	0.437086	0.47709	0.528678
Eur	Rural	2013	0.819296	0.897128	0.927819
Sear	Rural	2013	0.138841	0.193478	0.258112
Wpr	Rural	2013	0.149502	0.326513	0.553099
Afr	Rural	2014	0.0491736	0.057834	0.0696896
Amr	Rural	2014	0.672612	0.708639	0.740482
Emr	Rural	2014	0.441258	0.483772	0.537504
Eur	Rural	2014	0.815722	0.894373	0.927795
Sear	Rural	2014	0.150457	0.212964	0.280456
Wpr	Rural	2014	0.148013	0.339302	0.58541
Afr	Rural	2015	0.0492684	0.0582587	0.0710888
Amr	Rural	2015	0.677116	0.716062	0.748118
Emr	Rural	2015	0.444734	0.491181	0.546732
Eur	Rural	2015	0.806439	0.89138	0.929277
Sear	Rural	2015	0.165169	0.233841	0.312009
Wpr	Rural	2015	0.152597	0.349001	0.604271
Afr	Rural	2016	0.0492972	0.0584066	0.0730077
Amr	Rural	2016	0.68252	0.723081	0.755749
Emr	Rural	2016	0.448013	0.498654	0.556153
Eur	Rural	2016	0.794909	0.889235	0.929843
Sear	Rural	2016	0.17896	0.256614	0.343029
Wpr	Rural	2016	0.149324	0.362482	0.641821
Afr	Rural	2017	0.0493458	0.0590998	0.0731053
Amr	Rural	2017	0.689334	0.730148	0.762992
Emr	Rural	2017	0.452311	0.506712	0.568049
Eur	Rural	2017	0.787428	0.886656	0.928747
Sear	Rural	2017	0.188309	0.278243	0.38151
Wpr	Rural	2017	0.147511	0.375458	0.665461
Afr	Rural	2018	0.0493552	0.0597428	0.0765566
Amr	Rural	2018	0.692575	0.736061	0.770937
Emr	Rural	2018	0.458543	0.514645	0.581658
Eur	Rural	2018	0.778816	0.882489	0.927722
Sear	Rural	2018	0.199223	0.3036	0.420428
Wpr	Rural	2018	0.140943	0.384965	0.700828
Afr	Rural	2019	0.0490261	0.0601615	0.0767879
Amr	Rural	2019	0.697586	0.741705	0.777451
Emr	Rural	2019	0.459665	0.523508	0.595191
Eur	Rural	2019	0.7691	0.878642	0.929273
Sear	Rural	2019	0.207395	0.326835	0.469545
Wpr	Rural	2019	0.146388	0.397135	0.731881
Afr	Rural	2020	0.0491869	0.0613227	0.0802489
Amr	Rural	2020	0.69998	0.748318	0.785312
Emr	Rural	2020	0.461906	0.534471	0.611631
Eur	Rural	2020	0.759976	0.87495	0.92919
Sear	Rural	2020	0.213571	0.354798	0.520404
Wpr	Rural	2020	0.145319	0.411827	0.761084
Afr	Rural	2021	0.0488887	0.0621309	0.0839632
Amr	Rural	2021	0.70048	0.753309	0.794797
Emr	Rural	2021	0.466552	0.543006	0.633271
Eur	Rural	2021	0.755708	0.871263	0.929484
Sear	Rural	2021	0.225909	0.378649	0.559817
Wpr	Rural	2021	0.146912	0.417362	0.775773
Afr	Rural	2022	0.0489582	0.063208	0.0855438
Amr	Rural	2022	0.702655	0.758417	0.801857
Emr	Rural	2022	0.469182	0.554624	0.651163
Eur	Rural	2022	0.748998	0.868326	0.927678
Sear	Rural	2022	0.226519	0.404432	0.606013
Wpr	Rural	2022	0.142318	0.432874	0.801106
Afr	Rural	2023	0.0489363	0.0646758	0.090347
Amr	Rural	2023	0.703577	0.763211	0.810029
Emr	Rural	2023	0.470746	0.566275	0.674211
Eur	Rural	2023	0.740708	0.864	0.928413
Sear	Rural	2023	0.229444	0.43107	0.64859
Wpr	Rural	2023	0.144424	0.447494	0.814745
Afr	Rural	2024	0.0490121	0.065657	0.0939056
Amr	Rural	2024	0.70162	0.767991	0.81671
Emr	Rural	2024	0.472677	0.577467	0.691817
Eur	Rural	2024	0.732208	0.859137	0.928406
Sear	Rural	2024	0.235747	0.458451	0.690583
Wpr	Rural	2024	0.148431	0.459227	0.833549
Afr	Rural	2025	0.0484247	0.0662795	0.0991458
Amr	Rural	2025	0.705759	0.771719	0.821378
Emr	Rural	2025	0.475954	0.588381	0.713731
Eur	Rural	2025	0.726477	0.854491	0.92808
Sear	Rural	2025	0.239084	0.483601	0.723589
Wpr	Rural	2025	0.150635	0.469046	0.841076
Afr	Rural	2026	0.0487282	0.0677947	0.105924
Amr	Rural	2026	0.702341	0.775199	0.82943
Emr	Rural	2026	0.478477	0.598462	0.730896
Eur	Rural	2026	0.719274	0.849936	0.927434
Sear	Rural	2026	0.2443	0.511866	0.752362
Wpr	Rural	2026	0.149959	0.481251	0.852788
Afr	Rural	2027	0.0479858	0.0690239	0.110704
Amr	Rural	2027	0.704508	0.777905	0.832965
Emr	Rural	2027	0.478729	0.609335	0.750665
Eur	Rural	2027	0.71312	0.845723	0.926388
Sear	Rural	2027	0.250904	0.535172	0.781678
Wpr	Rural	2027	0.152647	0.493586	0.86212
Afr	Rural	2028	0.0481919	0.0698089	0.116002
Amr	Rural	2028	0.701451	0.781611	0.839965
Emr	Rural	2028	0.483102	0.619459	0.76892
Eur	Rural	2028	0.706589	0.841334	0.925445
Sear	Rural	2028	0.245928	0.561102	0.804442
Wpr	Rural	2028	0.154936	0.505782	0.865402
Afr	Rural	2029	0.0478427	0.0719422	0.121451
Amr	Rural	2029	0.699594	0.783294	0.84385
Emr	Rural	2029	0.484751	0.62939	0.785854
Eur	Rural	2029	0.702071	0.837156	0.926001
Sear	Rural	2029	0.258494	0.587797	0.828259
Wpr	Rural	2029	0.157516	0.515692	0.871092
Afr	Rural	2030	0.047489	0.0732365	0.131443
Amr	Rural	2030	0.696067	0.785672	0.84787
Emr	Rural	2030	0.486011	0.641044	0.798127
Eur	Rural	2030	0.697505	0.832275	0.924516
Sear	Rural	2030	0.263355	0.610184	0.841779
Wpr	Rural	2030	0.157481	0.52963	0.878387
Afr	Overall	1990	0.114434	0.14046	0.176397
Amr	Overall	1990	0.781356	0.816624	0.847509
Emr	Overall	1990	0.424889	0.514815	0.602591
Eur	Overall	1990	0.88759	0.92307	0.946886
Sear	Overall	1990	0.0615874	0.113195	0.191324
Wpr	Overall	1990	0.243533	0.463337	0.738496
Afr	Overall	1991	0.115902	0.139468	0.171392
Amr	Overall	1991	0.788904	0.823478	0.852003
Emr	Overall	1991	0.436521	0.522634	0.600833
Eur	Overall	1991	0.89267	0.925317	0.947334
Sear	Overall	1991	0.0660133	0.119926	0.200244
Wpr	Overall	1991	0.247865	0.464803	0.720478
Afr	Overall	1992	0.117363	0.138837	0.167322
Amr	Overall	1992	0.796124	0.829657	0.857477
Emr	Overall	1992	0.449889	0.530052	0.60273
Eur	Overall	1992	0.895571	0.927867	0.947908
Sear	Overall	1992	0.0697606	0.126079	0.203351
Wpr	Overall	1992	0.268463	0.461148	0.702371
Afr	Overall	1993	0.11788	0.138013	0.16485
Amr	Overall	1993	0.805266	0.83639	0.862327
Emr	Overall	1993	0.462786	0.536714	0.609516
Eur	Overall	1993	0.899573	0.930388	0.94985
Sear	Overall	1993	0.0743724	0.132969	0.213294
Wpr	Overall	1993	0.281492	0.464945	0.688066
Afr	Overall	1994	0.119552	0.137754	0.160763
Amr	Overall	1994	0.811516	0.841955	0.866491
Emr	Overall	1994	0.473205	0.543398	0.610286
Eur	Overall	1994	0.904976	0.932529	0.951248
Sear	Overall	1994	0.0820045	0.141187	0.225255
Wpr	Overall	1994	0.289763	0.464477	0.666229
Afr	Overall	1995	0.120865	0.13771	0.159893
Amr	Overall	1995	0.817053	0.847611	0.87179
Emr	Overall	1995	0.487634	0.551854	0.612949
Eur	Overall	1995	0.907636	0.935305	0.952327
Sear	Overall	1995	0.0863733	0.147835	0.234791
Wpr	Overall	1995	0.294729	0.464795	0.644898
Afr	Overall	1996	0.121877	0.137464	0.157648
Amr	Overall	1996	0.823704	0.853695	0.876448
Emr	Overall	1996	0.501438	0.55977	0.616011
Eur	Overall	1996	0.911024	0.93732	0.953703
Sear	Overall	1996	0.0898295	0.157381	0.247818
Wpr	Overall	1996	0.295761	0.468487	0.637465
Afr	Overall	1997	0.123068	0.137774	0.156129
Amr	Overall	1997	0.831237	0.85965	0.880907
Emr	Overall	1997	0.512843	0.568249	0.62728
Eur	Overall	1997	0.916145	0.939719	0.954936
Sear	Overall	1997	0.0948949	0.166061	0.258062
Wpr	Overall	1997	0.308145	0.470587	0.628136
Afr	Overall	1998	0.123999	0.137946	0.154583
Amr	Overall	1998	0.83663	0.864604	0.886768
Emr	Overall	1998	0.526544	0.578912	0.630891
Eur	Overall	1998	0.919141	0.942264	0.956536
Sear	Overall	1998	0.102553	0.177853	0.273254
Wpr	Overall	1998	0.319081	0.472653	0.62059
Afr	Overall	1999	0.125185	0.138525	0.15449
Amr	Overall	1999	0.842992	0.870055	0.890231
Emr	Overall	1999	0.537838	0.588304	0.641523
Eur	Overall	1999	0.92321	0.944869	0.95832
Sear	Overall	1999	0.10864	0.186638	0.283782
Wpr	Overall	1999	0.329116	0.476554	0.619592
Afr	Overall	2000	0.127008	0.139354	0.153593
Amr	Overall	2000	0.848787	0.875185	0.895593
Emr	Overall	2000	0.548868	0.596837	0.648386
Eur	Overall	2000	0.927836	0.94741	0.959962
Sear	Overall	2000	0.118786	0.197676	0.30165
Wpr	Overall	2000	0.337453	0.482276	0.618829
Afr	Overall	2001	0.128273	0.140205	0.154318
Amr	Overall	2001	0.852738	0.879659	0.899956
Emr	Overall	2001	0.560609	0.607068	0.656116
Eur	Overall	2001	0.929426	0.949891	0.961605
Sear	Overall	2001	0.123198	0.210783	0.31096
Wpr	Overall	2001	0.3486	0.490051	0.627055
Afr	Overall	2002	0.130265	0.141462	0.154637
Amr	Overall	2002	0.85776	0.883726	0.902347
Emr	Overall	2002	0.570109	0.615202	0.664023
Eur	Overall	2002	0.932155	0.952528	0.963744
Sear	Overall	2002	0.132748	0.221691	0.329814
Wpr	Overall	2002	0.359284	0.496115	0.625465
Afr	Overall	2003	0.13154	0.143045	0.155456
Amr	Overall	2003	0.861841	0.887364	0.905963
Emr	Overall	2003	0.58006	0.623614	0.669762
Eur	Overall	2003	0.934815	0.954803	0.965149
Sear	Overall	2003	0.136169	0.235158	0.346658
Wpr	Overall	2003	0.35556	0.504625	0.629083
Afr	Overall	2004	0.13364	0.144457	0.157201
Amr	Overall	2004	0.866321	0.891365	0.908899
Emr	Overall	2004	0.588053	0.631129	0.678726
Eur	Overall	2004	0.93468	0.956899	0.966792
Sear	Overall	2004	0.148091	0.245969	0.361806
Wpr	Overall	2004	0.369994	0.512412	0.63638
Afr	Overall	2005	0.13483	0.145919	0.158385
Amr	Overall	2005	0.870617	0.894452	0.911894
Emr	Overall	2005	0.595097	0.638992	0.688492
Eur	Overall	2005	0.937112	0.958589	0.968547
Sear	Overall	2005	0.160297	0.257383	0.377412
Wpr	Overall	2005	0.379389	0.521586	0.650285
Afr	Overall	2006	0.136848	0.147893	0.159954
Amr	Overall	2006	0.873471	0.8981	0.914485
Emr	Overall	2006	0.603468	0.64805	0.698982
Eur	Overall	2006	0.935626	0.959892	0.969704
Sear	Overall	2006	0.16666	0.27422	0.399376
Wpr	Overall	2006	0.396328	0.532648	0.659481
Afr	Overall	2007	0.139024	0.149412	0.161773
Amr	Overall	2007	0.876097	0.900659	0.916682
Emr	Overall	2007	0.61294	0.656817	0.70444
Eur	Overall	2007	0.934196	0.960783	0.97069
Sear	Overall	2007	0.182425	0.288987	0.414008
Wpr	Overall	2007	0.402685	0.541785	0.667561
Afr	Overall	2008	0.140699	0.151064	0.162794
Amr	Overall	2008	0.880426	0.903145	0.91938
Emr	Overall	2008	0.620085	0.663813	0.714264
Eur	Overall	2008	0.93265	0.961627	0.971459
Sear	Overall	2008	0.195215	0.304265	0.430077
Wpr	Overall	2008	0.417886	0.554927	0.690185
Afr	Overall	2009	0.141977	0.152783	0.165168
Amr	Overall	2009	0.883148	0.905585	0.921171
Emr	Overall	2009	0.628382	0.672488	0.721353
Eur	Overall	2009	0.929816	0.961477	0.972456
Sear	Overall	2009	0.21262	0.323487	0.451043
Wpr	Overall	2009	0.426012	0.563861	0.692987
Afr	Overall	2010	0.143795	0.154917	0.167007
Amr	Overall	2010	0.886935	0.907627	0.923343
Emr	Overall	2010	0.635397	0.679094	0.728387
Eur	Overall	2010	0.927413	0.961098	0.972824
Sear	Overall	2010	0.227215	0.340871	0.469318
Wpr	Overall	2010	0.439193	0.575704	0.705518
Afr	Overall	2011	0.145599	0.156686	0.169878
Amr	Overall	2011	0.888439	0.909835	0.924706
Emr	Overall	2011	0.638542	0.684817	0.734282
Eur	Overall	2011	0.924584	0.960839	0.973423
Sear	Overall	2011	0.238284	0.356813	0.488937
Wpr	Overall	2011	0.445295	0.586274	0.717474
Afr	Overall	2012	0.147296	0.159039	0.171913
Amr	Overall	2012	0.890427	0.91218	0.926463
Emr	Overall	2012	0.642638	0.690717	0.738697
Eur	Overall	2012	0.919854	0.959626	0.973176
Sear	Overall	2012	0.258065	0.376516	0.511123
Wpr	Overall	2012	0.451857	0.600134	0.730314
Afr	Overall	2013	0.150301	0.161602	0.174719
Amr	Overall	2013	0.893103	0.914012	0.928695
Emr	Overall	2013	0.649798	0.696412	0.74739
Eur	Overall	2013	0.911317	0.958313	0.973209
Sear	Overall	2013	0.272921	0.398651	0.532403
Wpr	Overall	2013	0.457104	0.612693	0.747022
Afr	Overall	2014	0.152582	0.164507	0.178808
Amr	Overall	2014	0.895687	0.916221	0.93
Emr	Overall	2014	0.653783	0.700357	0.751579
Eur	Overall	2014	0.905685	0.956514	0.972965
Sear	Overall	2014	0.289445	0.418185	0.554088
Wpr	Overall	2014	0.4709	0.624422	0.7587
Afr	Overall	2015	0.155745	0.168172	0.182747
Amr	Overall	2015	0.896033	0.917929	0.932191
Emr	Overall	2015	0.656281	0.70617	0.759035
Eur	Overall	2015	0.900816	0.955035	0.973015
Sear	Overall	2015	0.305902	0.436661	0.573206
Wpr	Overall	2015	0.470501	0.632188	0.773738
Afr	Overall	2016	0.158799	0.172172	0.188435
Amr	Overall	2016	0.899651	0.919475	0.933724
Emr	Overall	2016	0.662496	0.711569	0.762127
Eur	Overall	2016	0.890128	0.952981	0.972818
Sear	Overall	2016	0.318421	0.461327	0.602728
Wpr	Overall	2016	0.47737	0.645744	0.785904
Afr	Overall	2017	0.162044	0.176923	0.194069
Amr	Overall	2017	0.900284	0.921104	0.935436
Emr	Overall	2017	0.663664	0.715859	0.769941
Eur	Overall	2017	0.882485	0.950377	0.972609
Sear	Overall	2017	0.338751	0.482138	0.627407
Wpr	Overall	2017	0.477936	0.655273	0.80888
Afr	Overall	2018	0.165693	0.182074	0.200415
Amr	Overall	2018	0.901027	0.922459	0.936787
Emr	Overall	2018	0.669159	0.720852	0.778727
Eur	Overall	2018	0.874171	0.948458	0.97198
Sear	Overall	2018	0.358599	0.502845	0.652542
Wpr	Overall	2018	0.474599	0.66737	0.825461
Afr	Overall	2019	0.169158	0.187092	0.207344
Amr	Overall	2019	0.902035	0.923406	0.93847
Emr	Overall	2019	0.670469	0.727106	0.785133
Eur	Overall	2019	0.869684	0.945514	0.972018
Sear	Overall	2019	0.375364	0.522727	0.67503
Wpr	Overall	2019	0.477093	0.677305	0.835176
Afr	Overall	2020	0.172316	0.191542	0.214808
Amr	Overall	2020	0.90169	0.924163	0.939679
Emr	Overall	2020	0.670748	0.731448	0.792396
Eur	Overall	2020	0.857483	0.942669	0.970832
Sear	Overall	2020	0.388085	0.545856	0.697881
Wpr	Overall	2020	0.467468	0.682409	0.855182
Afr	Overall	2021	0.174306	0.195899	0.22011
Amr	Overall	2021	0.900043	0.924566	0.941043
Emr	Overall	2021	0.673308	0.736393	0.801434
Eur	Overall	2021	0.851572	0.938066	0.970893
Sear	Overall	2021	0.398435	0.568792	0.725238
Wpr	Overall	2021	0.463139	0.695363	0.867912
Afr	Overall	2022	0.1762	0.199873	0.226575
Amr	Overall	2022	0.89919	0.925011	0.942308
Emr	Overall	2022	0.676127	0.742492	0.809373
Eur	Overall	2022	0.84515	0.934951	0.969986
Sear	Overall	2022	0.413593	0.589714	0.748075
Wpr	Overall	2022	0.450593	0.701272	0.87586
Afr	Overall	2023	0.177797	0.202553	0.232097
Amr	Overall	2023	0.895592	0.925222	0.942928
Emr	Overall	2023	0.677418	0.747446	0.819257
Eur	Overall	2023	0.836232	0.931041	0.969623
Sear	Overall	2023	0.422292	0.609059	0.781659
Wpr	Overall	2023	0.442131	0.711693	0.886718
Afr	Overall	2024	0.178105	0.205433	0.238163
Amr	Overall	2024	0.893723	0.924871	0.943662
Emr	Overall	2024	0.677356	0.752102	0.824711
Eur	Overall	2024	0.829748	0.926843	0.969261
Sear	Overall	2024	0.427351	0.630424	0.796122
Wpr	Overall	2024	0.432412	0.714559	0.894674
Afr	Overall	2025	0.17839	0.207625	0.24277
Amr	Overall	2025	0.891006	0.924321	0.94459
Emr	Overall	2025	0.675859	0.757238	0.835011
Eur	Overall	2025	0.82348	0.922468	0.967718
Sear	Overall	2025	0.436111	0.648109	0.81099
Wpr	Overall	2025	0.426721	0.720483	0.90399
Afr	Overall	2026	0.17884	0.209753	0.246124
Amr	Overall	2026	0.886238	0.924161	0.945244
Emr	Overall	2026	0.677132	0.762583	0.840569
Eur	Overall	2026	0.817779	0.918244	0.967773
Sear	Overall	2026	0.456229	0.668521	0.8364
Wpr	Overall	2026	0.409553	0.728718	0.907722
Afr	Overall	2027	0.179643	0.211069	0.250936
Amr	Overall	2027	0.879972	0.922864	0.945501
Emr	Overall	2027	0.678732	0.766377	0.849775
Eur	Overall	2027	0.812397	0.914405	0.967041
Sear	Overall	2027	0.453673	0.684087	0.850997
Wpr	Overall	2027	0.405861	0.736786	0.917671
Afr	Overall	2028	0.178438	0.213022	0.256018
Amr	Overall	2028	0.874524	0.921857	0.945718
Emr	Overall	2028	0.678901	0.770573	0.855507
Eur	Overall	2028	0.807576	0.909934	0.965116
Sear	Overall	2028	0.468401	0.700052	0.864583
Wpr	Overall	2028	0.395345	0.740348	0.921013
Afr	Overall	2029	0.177546	0.214459	0.259612
Amr	Overall	2029	0.869643	0.920496	0.946753
Emr	Overall	2029	0.678208	0.774325	0.863988
Eur	Overall	2029	0.807486	0.902778	0.965106
Sear	Overall	2029	0.470586	0.717115	0.877441
Wpr	Overall	2029	0.377414	0.742026	0.924615
Afr	Overall	2030	0.178625	0.215632	0.264065
Amr	Overall	2030	0.866395	0.918342	0.946775
Emr	Overall	2030	0.672654	0.778429	0.868738
Eur	Overall	2030	0.80247	0.899439	0.963284
Sear	Overall	2030	0.477182	0.732713	0.888726
Wpr	Overall	2030	0.368606	0.749735	0.930791

## Sheet: Clean (Population)
region	area	year	population_lower95	population_median	population_upper95
Afr	Urban	1990	38648.2	46688.2	57610.6
Amr	Urban	1990	459675	477037	488557
Emr	Urban	1990	105730	126647	141630
Eur	Urban	1990	525495	546551	555290
Sear	Urban	1990	70993.9	96140.1	124816
Wpr	Urban	1990	230227	377349	468477
Afr	Urban	1991	40656.6	48727.3	59286.4
Amr	Urban	1991	473597	489676	500130
Emr	Urban	1991	112719	132154	146269
Eur	Urban	1991	531067	551060	559151
Sear	Urban	1991	77600.1	102759	130165
Wpr	Urban	1991	243419	389754	483428
Afr	Urban	1992	43023	50674.6	60553.2
Amr	Urban	1992	487263	502152	512086
Emr	Urban	1992	117360	137997	150726
Eur	Urban	1992	535895	555182	562539
Sear	Urban	1992	85438.9	110269	138592
Wpr	Urban	1992	263479	402806	496037
Afr	Urban	1993	45448.7	52670.8	61974.6
Amr	Urban	1993	499757	514813	523660
Emr	Urban	1993	125485	143491	155613
Eur	Urban	1993	541552	558781	565599
Sear	Urban	1993	91644.6	117838	146112
Wpr	Urban	1993	279911	415782	509991
Afr	Urban	1994	47482.7	54670.9	62955.7
Amr	Urban	1994	513443	527304	535840
Emr	Urban	1994	132744	149213	160152
Eur	Urban	1994	546227	562257	568895
Sear	Urban	1994	98298	126383	155413
Wpr	Urban	1994	299451	429360	525293
Afr	Urban	1995	49896.6	56740.8	65016.1
Amr	Urban	1995	525020	539886	548238
Emr	Urban	1995	139151	154709	164993
Eur	Urban	1995	551202	565463	571242
Sear	Urban	1995	106472	135063	165587
Wpr	Urban	1995	323304	444238	539614
Afr	Urban	1996	52279	58975.3	66823.3
Amr	Urban	1996	540012	552908	560591
Emr	Urban	1996	145489	160366	170202
Eur	Urban	1996	555192	568186	573595
Sear	Urban	1996	114352	144218	176763
Wpr	Urban	1996	340538	457434	549903
Afr	Urban	1997	54682.5	61037.1	68479
Amr	Urban	1997	552436	565901	573223
Emr	Urban	1997	152667	166258	175376
Eur	Urban	1997	558325	570848	575529
Sear	Urban	1997	123269	154086	188181
Wpr	Urban	1997	361000	472770	568742
Afr	Urban	1998	57097.9	63387.1	70319.4
Amr	Urban	1998	565294	578636	585995
Emr	Urban	1998	159936	172044	180936
Eur	Urban	1998	562391	573040	577432
Sear	Urban	1998	133218	166326	199137
Wpr	Urban	1998	385760	488753	578984
Afr	Urban	1999	59332.4	65707	72258.5
Amr	Urban	1999	578372	591832	598606
Emr	Urban	1999	165885	178142	186516
Eur	Urban	1999	564931	575475	579508
Sear	Urban	1999	144747	177552	212711
Wpr	Urban	1999	405594	504384	596463
Afr	Urban	2000	61906.7	68217	74638
Amr	Urban	2000	590374	604176	610735
Emr	Urban	2000	173477	184531	192341
Eur	Urban	2000	568972	578023	581699
Sear	Urban	2000	155365	190949	226148
Wpr	Urban	2000	424551	521640	613694
Afr	Urban	2001	64720.8	70984.9	77175.1
Amr	Urban	2001	601941	615424	621806
Emr	Urban	2001	180358	190867	198542
Eur	Urban	2001	572252	580988	584442
Sear	Urban	2001	167469	204793	241280
Wpr	Urban	2001	442662	543401	630959
Afr	Urban	2002	67718.9	73857.3	80051.5
Amr	Urban	2002	612568	626167	632571
Emr	Urban	2002	187412	197330	204770
Eur	Urban	2002	575209	584412	587605
Sear	Urban	2002	183011	220537	258107
Wpr	Urban	2002	466572	565611	655320
Afr	Urban	2003	70521	76815	82893.2
Amr	Urban	2003	623054	636309	642764
Emr	Urban	2003	194176	204119	211323
Eur	Urban	2003	578231	588134	591220
Sear	Urban	2003	196614	236733	275952
Wpr	Urban	2003	487748	588689	683077
Afr	Urban	2004	74111	80122.1	86281.5
Amr	Urban	2004	633854	646827	653078
Emr	Urban	2004	201679	211208	218564
Eur	Urban	2004	582092	591978	594969
Sear	Urban	2004	211313	254183	295184
Wpr	Urban	2004	510932	614722	713870
Afr	Urban	2005	77231.1	83588.9	89568.3
Amr	Urban	2005	643702	656989	663256
Emr	Urban	2005	209940	219173	225980
Eur	Urban	2005	585638	595962	598826
Sear	Urban	2005	226800	272363	314997
Wpr	Urban	2005	530402	639939	733727
Afr	Urban	2006	80814.7	87110	92949.7
Amr	Urban	2006	653582	667442	673561
Emr	Urban	2006	217863	227478	234180
Eur	Urban	2006	587814	599858	602879
Sear	Urban	2006	249131	294019	336889
Wpr	Urban	2006	549943	664139	761779
Afr	Urban	2007	84817.5	90869.1	96880.7
Amr	Urban	2007	664456	677865	683905
Emr	Urban	2007	227333	236288	242828
Eur	Urban	2007	591079	604077	606989
Sear	Urban	2007	269730	317416	363363
Wpr	Urban	2007	572969	690915	787063
Afr	Urban	2008	88392.7	94865.3	100743
Amr	Urban	2008	675129	688375	694392
Emr	Urban	2008	236101	245136	251518
Eur	Urban	2008	593215	608056	611282
Sear	Urban	2008	293308	342475	388106
Wpr	Urban	2008	591938	715387	815616
Afr	Urban	2009	92300.3	99050	105273
Amr	Urban	2009	685729	698430	704580
Emr	Urban	2009	244805	253892	260296
Eur	Urban	2009	594154	612001	615497
Sear	Urban	2009	314270	367703	413285
Wpr	Urban	2009	617794	741813	839233
Afr	Urban	2010	97041.2	103698	110170
Amr	Urban	2010	696001	708496	714565
Emr	Urban	2010	253566	262769	269381
Eur	Urban	2010	595486	615868	619646
Sear	Urban	2010	338742	393153	439969
Wpr	Urban	2010	637901	769604	870023
Afr	Urban	2011	101409	108519	115249
Amr	Urban	2011	705290	718294	724572
Emr	Urban	2011	261547	271168	277437
Eur	Urban	2011	597435	619265	623616
Sear	Urban	2011	364205	419280	466575
Wpr	Urban	2011	649980	795127	897123
Afr	Urban	2012	106813	113905	120895
Amr	Urban	2012	715463	727742	734192
Emr	Urban	2012	268824	279268	285812
Eur	Urban	2012	595180	622554	627517
Sear	Urban	2012	386583	444684	494247
Wpr	Urban	2012	663579	820193	929152
Afr	Urban	2013	112436	119810	127208
Amr	Urban	2013	724747	737194	743832
Emr	Urban	2013	276990	287126	293819
Eur	Urban	2013	595109	625584	631112
Sear	Urban	2013	409512	469551	518539
Wpr	Urban	2013	684783	846155	955186
Afr	Urban	2014	118586	126504	134976
Amr	Urban	2014	733472	746500	753122
Emr	Urban	2014	283920	295039	301659
Eur	Urban	2014	594181	628303	634809
Sear	Urban	2014	435951	495359	542342
Wpr	Urban	2014	691994	871869	985029
Afr	Urban	2015	125521	133955	143056
Amr	Urban	2015	742089	755706	762918
Emr	Urban	2015	290849	302785	309872
Eur	Urban	2015	591136	631309	638480
Sear	Urban	2015	456156	520322	569155
Wpr	Urban	2015	696954	895828	1.00881e+06
Afr	Urban	2016	133001	142563	152561
Amr	Urban	2016	750610	764739	771888
Emr	Urban	2016	297604	310445	318229
Eur	Urban	2016	591286	633845	642437
Sear	Urban	2016	469341	544552	595541
Wpr	Urban	2016	696707	919137	1.04175e+06
Afr	Urban	2017	140391	151275	163092
Amr	Urban	2017	760146	773838	781657
Emr	Urban	2017	303752	317961	326392
Eur	Urban	2017	586111	636785	645979
Sear	Urban	2017	492124	568495	621126
Wpr	Urban	2017	689371	945712	1.07005e+06
Afr	Urban	2018	148943	161499	174428
Amr	Urban	2018	767632	782864	790863
Emr	Urban	2018	310243	325415	334198
Eur	Urban	2018	580281	639239	649839
Sear	Urban	2018	507820	593526	649577
Wpr	Urban	2018	690531	969474	1.09743e+06
Afr	Urban	2019	156982	171492	187367
Amr	Urban	2019	774210	791436	800606
Emr	Urban	2019	315241	332659	342549
Eur	Urban	2019	576946	641340	653422
Sear	Urban	2019	522960	617207	674300
Wpr	Urban	2019	679070	992046	1.12441e+06
Afr	Urban	2020	164282	181720	200332
Amr	Urban	2020	781750	799891	809422
Emr	Urban	2020	320792	340160	350876
Eur	Urban	2020	575024	643148	656807
Sear	Urban	2020	537344	640719	700212
Wpr	Urban	2020	665376	1.01571e+06	1.14976e+06
Afr	Urban	2021	171695	191135	211738
Amr	Urban	2021	788021	807955	818713
Emr	Urban	2021	325302	347544	359467
Eur	Urban	2021	572082	644864	659865
Sear	Urban	2021	547584	664572	723365
Wpr	Urban	2021	641661	1.03762e+06	1.17462e+06
Afr	Urban	2022	178560	200246	224703
Amr	Urban	2022	793836	816117	828356
Emr	Urban	2022	329819	355046	368066
Eur	Urban	2022	569527	645347	662582
Sear	Urban	2022	563087	687500	748450
Wpr	Urban	2022	621105	1.05805e+06	1.19556e+06
Afr	Urban	2023	184263	208878	235582
Amr	Urban	2023	799386	823540	836703
Emr	Urban	2023	333101	362448	376580
Eur	Urban	2023	564778	645628	665537
Sear	Urban	2023	575806	710605	772467
Wpr	Urban	2023	595034	1.07935e+06	1.21746e+06
Afr	Urban	2024	189690	217266	247801
Amr	Urban	2024	802989	831282	845987
Emr	Urban	2024	335773	369765	385639
Eur	Urban	2024	564819	646046	668261
Sear	Urban	2024	584734	733784	795213
Wpr	Urban	2024	596982	1.09918e+06	1.2384e+06
Afr	Urban	2025	194023	224898	258762
Amr	Urban	2025	805970	838393	854350
Emr	Urban	2025	339722	377186	394190
Eur	Urban	2025	564725	645990	670775
Sear	Urban	2025	595263	757223	817859
Wpr	Urban	2025	556789	1.11785e+06	1.25786e+06
Afr	Urban	2026	198402	232132	269803
Amr	Urban	2026	809392	845290	863404
Emr	Urban	2026	343276	384558	402815
Eur	Urban	2026	563809	645927	673424
Sear	Urban	2026	607015	779621	841930
Wpr	Urban	2026	548068	1.13019e+06	1.27486e+06
Afr	Urban	2027	202067	238912	280121
Amr	Urban	2027	809617	852222	871663
Emr	Urban	2027	346608	391900	411224
Eur	Urban	2027	564518	645563	675744
Sear	Urban	2027	613312	801405	863172
Wpr	Urban	2027	530799	1.15065e+06	1.29384e+06
Afr	Urban	2028	206038	245808	290558
Amr	Urban	2028	812424	858536	879475
Emr	Urban	2028	350609	398862	420270
Eur	Urban	2028	564962	644520	678554
Sear	Urban	2028	621471	824410	886121
Wpr	Urban	2028	506540	1.16644e+06	1.30944e+06
Afr	Urban	2029	210378	252596	301933
Amr	Urban	2029	813311	864077	887457
Emr	Urban	2029	350535	405675	429537
Eur	Urban	2029	565296	643261	681244
Sear	Urban	2029	635270	845502	907993
Wpr	Urban	2029	483437	1.17752e+06	1.32631e+06
Afr	Urban	2030	213870	258383	313581
Amr	Urban	2030	812821	870360	895393
Emr	Urban	2030	354557	412003	437838
Eur	Urban	2030	564858	642650	683536
Sear	Urban	2030	641588	868393	930612
Wpr	Urban	2030	463992	1.19294e+06	1.3408e+06
Afr	Rural	1990	15585.7	24276.1	39687.6
Amr	Rural	1990	98839	108993	120874
Emr	Rural	1990	42500.5	63581.1	84444.1
Eur	Rural	1990	205080	224444	238275
Sear	Rural	1990	20461.3	36568.3	63837.6
Wpr	Rural	1990	66358	311494	758083
Afr	Rural	1991	16098.5	23930	37807.8
Amr	Rural	1991	99658.8	109895	121045
Emr	Rural	1991	45291.4	66121.7	85304.5
Eur	Rural	1991	206938	225159	238686
Sear	Rural	1991	22002.9	38700.2	65576.1
Wpr	Rural	1991	69087.7	301487	728826
Afr	Rural	1992	16354.6	23741.9	36451.2
Amr	Rural	1992	101302	110707	121056
Emr	Rural	1992	48595.9	68473.2	87265.5
Eur	Rural	1992	208637	226282	239139
Sear	Rural	1992	24711.1	41937.6	70178.9
Wpr	Rural	1992	75218.9	304991	691786
Afr	Rural	1993	16566.6	23656.3	35329.6
Amr	Rural	1993	102292	111935	121530
Emr	Rural	1993	52742.5	71169.3	88406.7
Eur	Rural	1993	210453	226992	239193
Sear	Rural	1993	27445.4	45367.5	72851.1
Wpr	Rural	1993	81142.6	303218	665761
Afr	Rural	1994	17298.5	23616.1	34161.9
Amr	Rural	1994	103046	112753	122342
Emr	Rural	1994	56402.5	73996.2	90075.3
Eur	Rural	1994	211353	227713	239491
Sear	Rural	1994	30129.2	49492.1	78243.1
Wpr	Rural	1994	82509.2	293734	631981
Afr	Rural	1995	17811.4	23596.9	33671.2
Amr	Rural	1995	104417	113703	122910
Emr	Rural	1995	60107.6	76887.1	92096.2
Eur	Rural	1995	212374	228428	239495
Sear	Rural	1995	32743.3	53232.7	84573.9
Wpr	Rural	1995	91224	286481	603001
Afr	Rural	1996	17834.7	23644.7	32978.1
Amr	Rural	1996	105439	114787	123815
Emr	Rural	1996	64946.9	80581.7	94833.7
Eur	Rural	1996	214434	228892	239525
Sear	Rural	1996	35625.4	57333.5	90670.1
Wpr	Rural	1996	96953.3	282204	588955
Afr	Rural	1997	18757.5	23720.1	31928.8
Amr	Rural	1997	106711	115622	124468
Emr	Rural	1997	69772	84233.8	97516.1
Eur	Rural	1997	215778	229542	239832
Sear	Rural	1997	39824.8	63361.5	98382.7
Wpr	Rural	1997	100779	279234	567716
Afr	Rural	1998	19154.7	23896.7	31228.6
Amr	Rural	1998	107388	116428	125321
Emr	Rural	1998	74678.1	88267.7	100979
Eur	Rural	1998	217380	230307	239789
Sear	Rural	1998	43007.6	68703.8	104335
Wpr	Rural	1998	110242	271314	539399
Afr	Rural	1999	19662	24172.7	31383.3
Amr	Rural	1999	108607	117020	125594
Emr	Rural	1999	80483	92577.9	104583
Eur	Rural	1999	218328	231077	240392
Sear	Rural	1999	47342.8	75235.1	114622
Wpr	Rural	1999	109070	266226	522117
Afr	Rural	2000	20087.9	24524.8	31447.2
Amr	Rural	2000	109576	117954	126115
Emr	Rural	2000	85551.8	96801.9	107864
Eur	Rural	2000	220305	232011	240340
Sear	Rural	2000	51743.2	81486.5	122972
Wpr	Rural	2000	114050	262269	511744
Afr	Rural	2001	20887.4	25054	31184.2
Amr	Rural	2001	111063	119299	127551
Emr	Rural	2001	90434	100814	111776
Eur	Rural	2001	221271	232913	240576
Sear	Rural	2001	56278.4	87532.2	131628
Wpr	Rural	2001	112337	257401	482694
Afr	Rural	2002	21328.9	25538.2	31655
Amr	Rural	2002	112379	120843	128835
Emr	Rural	2002	95197	105099	115966
Eur	Rural	2002	222025	233507	240488
Sear	Rural	2002	61100.3	94352.3	142710
Wpr	Rural	2002	116866	254777	489768
Afr	Rural	2003	21875.5	26142.1	32011.4
Amr	Rural	2003	114205	122154	130030
Emr	Rural	2003	99210.5	108872	119567
Eur	Rural	2003	223314	234084	240546
Sear	Rural	2003	64709	101465	151485
Wpr	Rural	2003	116062	247468	456058
Afr	Rural	2004	22500.5	26725.6	32582.6
Amr	Rural	2004	115241	123307	130918
Emr	Rural	2004	103316	112661	123085
Eur	Rural	2004	223311	234425	240619
Sear	Rural	2004	71958.2	108494	159248
Wpr	Rural	2004	118942	248450	446735
Afr	Rural	2005	23201.6	27477.8	33565
Amr	Rural	2005	116799	124644	132343
Emr	Rural	2005	106658	116217	127081
Eur	Rural	2005	224017	234605	240661
Sear	Rural	2005	78653.2	116802	171835
Wpr	Rural	2005	121918	246323	458854
Afr	Rural	2006	23663.1	28087.9	33964.7
Amr	Rural	2006	118452	125987	133459
Emr	Rural	2006	110506	119860	131096
Eur	Rural	2006	223303	234606	240498
Sear	Rural	2006	84900.3	126033	186355
Wpr	Rural	2006	119286	246284	439227
Afr	Rural	2007	24304.3	28854.6	34670.5
Amr	Rural	2007	119446	127011	134278
Emr	Rural	2007	114364	123451	135277
Eur	Rural	2007	223171	234470	240530
Sear	Rural	2007	95006	137596	196988
Wpr	Rural	2007	119175	245402	439694
Afr	Rural	2008	25117.3	29523.2	34951.8
Amr	Rural	2008	121203	128301	135040
Emr	Rural	2008	117539	127247	139188
Eur	Rural	2008	221095	233983	240165
Sear	Rural	2008	103698	149245	208637
Wpr	Rural	2008	119127	247856	438108
Afr	Rural	2009	25811.7	30280.3	36127.2
Amr	Rural	2009	122321	129284	136032
Emr	Rural	2009	121356	131010	143488
Eur	Rural	2009	219478	233531	240009
Sear	Rural	2009	113210	161988	228840
Wpr	Rural	2009	116031	249490	444020
Afr	Rural	2010	26275.1	30955.9	37043.3
Amr	Rural	2010	123103	130355	136855
Emr	Rural	2010	124692	134814	147977
Eur	Rural	2010	218387	232805	239532
Sear	Rural	2010	125994	178187	247607
Wpr	Rural	2010	122044	254560	438930
Afr	Rural	2011	27140.5	31760.8	38021.2
Amr	Rural	2011	124474	131385	137546
Emr	Rural	2011	127883	139246	154190
Eur	Rural	2011	217077	232016	239351
Sear	Rural	2011	141107	194678	270260
Wpr	Rural	2011	120239	259233	442085
Afr	Rural	2012	27309.1	32468.1	39224.2
Amr	Rural	2012	125757	132362	138590
Emr	Rural	2012	131645	143427	157977
Eur	Rural	2012	213993	231269	238788
Sear	Rural	2012	153522	215199	291567
Wpr	Rural	2012	121271	264152	449712
Afr	Rural	2013	28246.3	33057.3	40304.7
Amr	Rural	2013	126369	133475	139434
Emr	Rural	2013	135045	147404	163343
Eur	Rural	2013	210326	230307	238185
Sear	Rural	2013	169457	236142	315028
Wpr	Rural	2013	122972	268571	454948
Afr	Rural	2014	28818.6	33894.1	40842.2
Amr	Rural	2014	127588	134422	140462
Emr	Rural	2014	138556	151905	168777
Eur	Rural	2014	208884	229024	237582
Sear	Rural	2014	184442	261069	343807
Wpr	Rural	2014	119842	274723	473990
Afr	Rural	2015	29403	34768.4	42425.2
Amr	Rural	2015	128166	135538	141606
Emr	Rural	2015	141735	156538	174242
Eur	Rural	2015	205954	227647	237325
Sear	Rural	2015	203280	287797	384001
Wpr	Rural	2015	121536	277963	481273
Afr	Rural	2016	29949.4	35483.6	44354.2
Amr	Rural	2016	128876	136534	142703
Emr	Rural	2016	144846	161218	179808
Eur	Rural	2016	202413	226432	236772
Sear	Rural	2016	221029	316937	423667
Wpr	Rural	2016	116902	283777	502463
Afr	Rural	2017	30508.3	36538.8	45197.8
Amr	Rural	2017	129806	137492	143676
Emr	Rural	2017	148275	166109	186216
Eur	Rural	2017	199855	225040	235723
Sear	Rural	2017	233295	344714	472650
Wpr	Rural	2017	113439	288734	511752
Afr	Rural	2018	31042.4	37575.8	48151
Amr	Rural	2018	130015	138178	144725
Emr	Rural	2018	152336	170973	193236
Eur	Rural	2018	196923	223137	234574
Sear	Rural	2018	247472	377128	522250
Wpr	Rural	2018	106440	290723	529262
Afr	Rural	2019	31358.2	38480.7	49115.4
Amr	Rural	2019	130506	138760	145448
Emr	Rural	2019	154696	176182	200306
Eur	Rural	2019	193607	221182	233928
Sear	Rural	2019	258194	406890	584555
Wpr	Rural	2019	108541	294461	542661
Afr	Rural	2020	31983.2	39874.4	52180.9
Amr	Rural	2020	130459	139468	146363
Emr	Rural	2020	157421	182152	208449
Eur	Rural	2020	190325	219119	232702
Sear	Rural	2020	266354	442483	649019
Wpr	Rural	2020	105770	299747	553954
Afr	Rural	2021	32305.1	41055.4	55482
Amr	Rural	2021	130011	139817	147517
Emr	Rural	2021	160970	187349	218492
Eur	Rural	2021	188137	216905	231399
Sear	Rural	2021	282114	472853	699094
Wpr	Rural	2021	104950	298152	554192
Afr	Rural	2022	32864	42429.4	57422.7
Amr	Rural	2022	129829	140132	148158
Emr	Rural	2022	163814	193646	227352
Eur	Rural	2022	185226	214735	229413
Sear	Rural	2022	283120	505489	757441
Wpr	Rural	2022	99773.2	303469	561620
Afr	Rural	2023	33358.2	44087.3	61586.6
Amr	Rural	2023	129367	140332	148941
Emr	Rural	2023	166241	199976	238093
Eur	Rural	2023	181835	212102	227915
Sear	Rural	2023	286892	538999	810982
Wpr	Rural	2023	99352.6	307840	560480
Afr	Rural	2024	33916	45434.1	64981.8
Amr	Rural	2024	128333	140473	149384
Emr	Rural	2024	168720	206124	246941
Eur	Rural	2024	178334	209249	226119
Sear	Rural	2024	294749	573188	863417
Wpr	Rural	2024	100190	309975	562639
Afr	Rural	2025	34005.6	46544	69623.9
Amr	Rural	2025	128366	140363	149395
Emr	Rural	2025	171587	212118	257309
Eur	Rural	2025	175462	206380	224154
Sear	Rural	2025	298746	604281	904157
Wpr	Rural	2025	99764.3	310644	557036
Afr	Rural	2026	34713.9	48296.8	75460.3
Amr	Rural	2026	126978	140151	149955
Emr	Rural	2026	174083	217738	265921
Eur	Rural	2026	172193	203473	222026
Sear	Rural	2026	304932	638905	939088
Wpr	Rural	2026	97447.4	312731	554166
Afr	Rural	2027	34667.9	49867.1	79979.2
Amr	Rural	2027	126558	139743	149634
Emr	Rural	2027	175646	223566	275420
Eur	Rural	2027	169136	200586	219718
Sear	Rural	2027	312676	666929	974126
Wpr	Rural	2027	97330.7	314720	549705
Afr	Rural	2028	35297	51129.9	84963.2
Amr	Rural	2028	125157	139459	149871
Emr	Rural	2028	178624	229041	284303
Eur	Rural	2028	165953	197600	217354
Sear	Rural	2028	305829	697771	1.00038e+06
Wpr	Rural	2028	96940.1	316456	541462
Afr	Rural	2029	35512.9	53401.6	90151
Amr	Rural	2029	123930	138757	149484
Emr	Rural	2029	180510	234370	292634
Eur	Rural	2029	163205	194607	215260
Sear	Rural	2029	320612	729049	1.0273e+06
Wpr	Rural	2029	96717.1	316641	534862
Afr	Rural	2030	35713.4	55076.4	98849.5
Amr	Rural	2030	122371	138124	149058
Emr	Rural	2030	182165	240274	299151
Eur	Rural	2030	160408	191401	212614
Sear	Rural	2030	325613	754434	1.04078e+06
Wpr	Rural	2030	94904.5	319176	529351
Afr	Overall	1990	58423.2	71711	90058
Amr	Overall	1990	555352	580419	602370
Emr	Overall	1990	156324	189410	221704
Eur	Overall	1990	740042	769623	789480
Sear	Overall	1990	80855.2	148608	251180
Wpr	Overall	1990	373393	710404	1.13229e+06
Afr	Overall	1991	60825.9	73193.3	89947.3
Amr	Overall	1991	569308	594258	614843
Emr	Overall	1991	165068	197631	227201
Eur	Overall	1991	747636	774979	793419
Sear	Overall	1991	88377.6	160555	268084
Wpr	Overall	1991	385515	722927	1.12059e+06
Afr	Overall	1992	63300.6	74883	90246.3
Amr	Overall	1992	583223	607789	628169
Emr	Overall	1992	174717	205849	234074
Eur	Overall	1992	753040	780197	797048
Sear	Overall	1992	95194.2	172046	277490
Wpr	Overall	1992	422975	726560	1.10662e+06
Afr	Overall	1993	65327.5	76484.7	91357.7
Amr	Overall	1993	598778	621922	641208
Emr	Overall	1993	184435	213898	242912
Eur	Overall	1993	758989	784988	801409
Sear	Overall	1993	103402	184870	296547
Wpr	Overall	1993	448705	741133	1.09679e+06
Afr	Overall	1994	68056.1	78417.8	91516.5
Amr	Overall	1994	612432	635403	653920
Emr	Overall	1994	193376	222060	249394
Eur	Overall	1994	765749	789063	804902
Sear	Overall	1994	116128	199936	318986
Wpr	Overall	1994	466852	748342	1.0734e+06
Afr	Overall	1995	70654.2	80501.6	93469.4
Amr	Overall	1995	625766	649169	667688
Emr	Overall	1995	204174	231063	256644
Eur	Overall	1995	769834	793302	807740
Sear	Overall	1995	124552	213182	338573
Wpr	Overall	1995	479592	756330	1.0494e+06
Afr	Overall	1996	73141.9	82496.1	94609
Amr	Overall	1996	640201	663511	681195
Emr	Overall	1996	214958	239964	264074
Eur	Overall	1996	774160	796505	810427
Sear	Overall	1996	131876	231046	363813
Wpr	Overall	1996	485718	769379	1.04688e+06
Afr	Overall	1997	75804.5	84862.3	96168.1
Amr	Overall	1997	655564	677972	694736
Emr	Overall	1997	224937	249239	275130
Eur	Overall	1997	779629	799691	812640
Sear	Overall	1997	141791	248126	385593
Wpr	Overall	1997	510349	779384	1.04032e+06
Afr	Overall	1998	78379.7	87195.3	97711.3
Amr	Overall	1998	669358	691739	709471
Emr	Overall	1998	236172	259661	282975
Eur	Overall	1998	783136	802838	814998
Sear	Overall	1998	155915	270397	415437
Wpr	Overall	1998	532639	788996	1.03595e+06
Afr	Overall	1999	81197	89849.9	100205
Amr	Overall	1999	683882	705837	722204
Emr	Overall	1999	246612	269752	294154
Eur	Overall	1999	787632	806111	817587
Sear	Overall	1999	168005	288623	438849
Wpr	Overall	1999	553531	801503	1.04207e+06
Afr	Overall	2000	84532.9	92749.7	102227
Amr	Overall	2000	697799	719501	736279
Emr	Overall	2000	257225	279705	303863
Eur	Overall	2000	792860	809587	820313
Sear	Overall	2000	186779	310827	474316
Wpr	Overall	2000	571710	817067	1.04841e+06
Afr	Overall	2001	87606.7	95756.3	105395
Amr	Overall	2001	709965	732379	749277
Emr	Overall	2001	268480	290729	314219
Eur	Overall	2001	795813	813337	823367
Sear	Overall	2001	196900	336881	496989
Wpr	Overall	2001	594841	836209	1.06999e+06
Afr	Overall	2002	91295.8	99143.6	108377
Amr	Overall	2002	722817	744698	760389
Emr	Overall	2002	278966	301030	324920
Eur	Overall	2002	800042	817527	827154
Sear	Overall	2002	215572	360008	535590
Wpr	Overall	2002	617409	852544	1.07483e+06
Afr	Overall	2003	94612.8	102888	111815
Amr	Overall	2003	734785	756544	772402
Emr	Overall	2003	290000	311775	334847
Eur	Overall	2003	804498	821700	830604
Sear	Overall	2003	224592	387860	571765
Wpr	Overall	2003	615272	873216	1.08858e+06
Afr	Overall	2004	98668.3	106655	116064
Amr	Overall	2004	747168	768768	783891
Emr	Overall	2004	300419	322426	346742
Eur	Overall	2004	806785	825964	834503
Sear	Overall	2004	247977	411874	605842
Wpr	Overall	2004	644646	892783	1.10877e+06
Afr	Overall	2005	102207	110614	120063
Amr	Overall	2005	759597	780392	795610
Emr	Overall	2005	310724	333643	359489
Eur	Overall	2005	811478	830076	838698
Sear	Overall	2005	272383	437356	641313
Wpr	Overall	2005	665486	914913	1.14066e+06
Afr	Overall	2006	106534	115133	124522
Amr	Overall	2006	770995	792734	807197
Emr	Overall	2006	322115	345912	373098
Eur	Overall	2006	812977	834062	842587
Sear	Overall	2006	287251	472638	688354
Wpr	Overall	2006	699835	940550	1.16451e+06
Afr	Overall	2007	111169	119476	129360
Amr	Overall	2007	782356	804290	818598
Emr	Overall	2007	334513	358459	384449
Eur	Overall	2007	814713	837899	846539
Sear	Overall	2007	318786	505003	723477
Wpr	Overall	2007	715756	963000	1.18656e+06
Afr	Overall	2008	115584	124099	133735
Amr	Overall	2008	795342	815866	830532
Emr	Overall	2008	346020	370421	398574
Eur	Overall	2008	816468	841834	850442
Sear	Overall	2008	345728	538859	761674
Wpr	Overall	2008	747654	992837	1.23483e+06
Afr	Overall	2009	119837	128958	139412
Amr	Overall	2009	806866	827365	841605
Emr	Overall	2009	358494	383656	411534
Eur	Overall	2009	817121	844945	854593
Sear	Overall	2009	381479	580396	809256
Wpr	Overall	2009	767196	1.01545e+06	1.24799e+06
Afr	Overall	2010	124714	134361	144846
Amr	Overall	2010	819259	838372	852890
Emr	Overall	2010	370520	396001	424746
Eur	Overall	2010	818106	847821	858166
Sear	Overall	2010	412857	619374	852766
Wpr	Overall	2010	796140	1.0436e+06	1.27892e+06
Afr	Overall	2011	129764	139645	151402
Amr	Overall	2011	829404	849378	863261
Emr	Overall	2011	380505	408080	437556
Eur	Overall	2011	818628	850728	861870
Sear	Overall	2011	438336	656376	899424
Wpr	Overall	2011	812537	1.06978e+06	1.30918e+06
Afr	Overall	2012	134901	145656	157447
Amr	Overall	2012	839869	860387	873859
Emr	Overall	2012	391229	420499	449709
Eur	Overall	2012	817366	852707	864747
Sear	Overall	2012	480449	700971	951574
Wpr	Overall	2012	829951	1.1023e+06	1.34141e+06
Afr	Overall	2013	141447	152082	164426
Amr	Overall	2013	850885	870805	884795
Emr	Overall	2013	404002	432984	464679
Eur	Overall	2013	812623	854529	867812
Sear	Overall	2013	514074	750899	1.00284e+06
Wpr	Overall	2013	845046	1.13268e+06	1.38102e+06
Afr	Overall	2014	147529	159058	172886
Amr	Overall	2014	861763	881519	894776
Emr	Overall	2014	414931	444489	476998
Eur	Overall	2014	810405	855887	870607
Sear	Overall	2014	551449	796725	1.05565e+06
Wpr	Overall	2014	876019	1.16162e+06	1.41142e+06
Afr	Overall	2015	154680	167022	181498
Amr	Overall	2015	870444	891714	905569
Emr	Overall	2015	424947	457250	491480
Eur	Overall	2015	808835	857518	873662
Sear	Overall	2015	589332	841244	1.1043e+06
Wpr	Overall	2015	880509	1.1831e+06	1.448e+06
Afr	Overall	2016	161962	175601	192189
Amr	Overall	2016	882271	901711	915685
Emr	Overall	2016	437398	469797	503177
Eur	Overall	2016	801998	858627	876501
Sear	Overall	2016	620167	898495	1.17389e+06
Wpr	Overall	2016	898406	1.21528e+06	1.47906e+06
Afr	Overall	2017	169684	185265	203219
Amr	Overall	2017	891124	911731	925917
Emr	Overall	2017	446532	481650	518038
Eur	Overall	2017	797812	859190	879289
Sear	Overall	2017	666818	949070	1.23503e+06
Wpr	Overall	2017	904250	1.23977e+06	1.53039e+06
Afr	Overall	2018	178095	195701	215415
Amr	Overall	2018	900008	921415	935728
Emr	Overall	2018	458623	494051	533717
Eur	Overall	2018	792846	860222	881555
Sear	Overall	2018	713261	1.00017e+06	1.29792e+06
Wpr	Overall	2018	902404	1.26894e+06	1.56953e+06
Afr	Overall	2019	186582	206363	228701
Amr	Overall	2019	909075	930613	945795
Emr	Overall	2019	467953	507483	547984
Eur	Overall	2019	791071	860047	884154
Sear	Overall	2019	754219	1.05032e+06	1.35634e+06
Wpr	Overall	2019	911358	1.29381e+06	1.59538e+06
Afr	Overall	2020	194998	216755	243083
Amr	Overall	2020	916681	939528	955302
Emr	Overall	2020	476651	519786	563097
Eur	Overall	2020	781916	859595	885275
Sear	Overall	2020	787531	1.10769e+06	1.41619e+06
Wpr	Overall	2020	896821	1.30918e+06	1.64064e+06
Afr	Overall	2021	202318	227382	255483
Amr	Overall	2021	922837	947981	964875
Emr	Overall	2021	487085	532722	579774
Eur	Overall	2021	778102	857133	887128
Sear	Overall	2021	816369	1.16542e+06	1.48597e+06
Wpr	Overall	2021	892047	1.33933e+06	1.67167e+06
Afr	Overall	2022	209719	237895	269676
Amr	Overall	2022	929674	956371	974253
Emr	Overall	2022	497827	546691	595935
Eur	Overall	2022	773478	855663	887727
Sear	Overall	2022	855426	1.21969e+06	1.54723e+06
Wpr	Overall	2022	871029	1.35561e+06	1.6931e+06
Afr	Overall	2023	216949	247157	283207
Amr	Overall	2023	933516	964400	982856
Emr	Overall	2023	507501	559963	613762
Eur	Overall	2023	766296	853176	888531
Sear	Overall	2023	881431	1.27126e+06	1.63152e+06
Wpr	Overall	2023	857484	1.38028e+06	1.71973e+06
Afr	Overall	2024	222748	256925	297859
Amr	Overall	2024	938984	971709	991452
Emr	Overall	2024	516108	573060	628384
Eur	Overall	2024	761178	850248	889161
Sear	Overall	2024	899925	1.32756e+06	1.67649e+06
Wpr	Overall	2024	841127	1.38996e+06	1.74032e+06
Afr	Overall	2025	228620	266087	311128
Amr	Overall	2025	943385	978657	1.00012e+06
Emr	Overall	2025	523484	586516	646754
Eur	Overall	2025	756172	847069	888620
Sear	Overall	2025	926277	1.37655e+06	1.7225e+06
Wpr	Overall	2025	832270	1.40522e+06	1.76313e+06
Afr	Overall	2026	234810	275397	323151
Amr	Overall	2026	945410	985865	1.00836e+06
Emr	Overall	2026	532867	600113	661483
Eur	Overall	2026	751624	843961	889484
Sear	Overall	2026	977063	1.43171e+06	1.79124e+06
Wpr	Overall	2026	800675	1.42464e+06	1.77459e+06
Afr	Overall	2027	241587	283848	337462
Amr	Overall	2027	945602	991693	1.01602e+06
Emr	Overall	2027	542423	612467	679116
Eur	Overall	2027	747295	841129	889547
Sear	Overall	2027	979382	1.4768e+06	1.83712e+06
Wpr	Overall	2027	795097	1.44339e+06	1.79775e+06
Afr	Overall	2028	245733	293359	352571
Amr	Overall	2028	946424	997648	1.02347e+06
Emr	Overall	2028	550758	625128	694030
Eur	Overall	2028	743411	837636	888434
Sear	Overall	2028	1.01899e+06	1.52294e+06	1.88087e+06
Wpr	Overall	2028	775876	1.45295e+06	1.80751e+06
Afr	Overall	2029	250327	302371	366033
Amr	Overall	2029	947610	1.00302e+06	1.03163e+06
Emr	Overall	2029	558324	637451	711263
Eur	Overall	2029	743807	831584	888997
Sear	Overall	2029	1.03134e+06	1.57164e+06	1.92301e+06
Wpr	Overall	2029	741801	1.45844e+06	1.81732e+06
Afr	Overall	2030	257788	311196	381094
Amr	Overall	2030	950335	1.00732e+06	1.0385e+06
Emr	Overall	2030	561774	650113	725536
Eur	Overall	2030	739587	828957	887799
Sear	Overall	2030	1.05325e+06	1.61726e+06	1.96162e+06
Wpr	Overall	2030	725388	1.47542e+06	1.83172e+06

## Sheet: Polluting (%)
region	area	year	percent_lower95	percent_median	percent_upper95
Afr	Urban	1990	0.605024	0.679908	0.73503
Amr	Urban	1990	0.050552	0.07294	0.106681
Emr	Urban	1990	0.130802	0.222756	0.351125
Eur	Urban	1990	0.0138957	0.0294149	0.0668063
Sear	Urban	1990	0.635842	0.719505	0.792871
Wpr	Urban	1990	0.0903992	0.267334	0.552988
Afr	Urban	1991	0.610827	0.68014	0.733118
Amr	Urban	1991	0.0487411	0.0686244	0.0992076
Emr	Urban	1991	0.132268	0.216004	0.331304
Eur	Urban	1991	0.0133142	0.0275909	0.0628704
Sear	Urban	1991	0.63243	0.709822	0.780867
Wpr	Urban	1991	0.0933959	0.269068	0.5435
Afr	Urban	1992	0.619099	0.681239	0.72937
Amr	Urban	1992	0.0464746	0.0649731	0.0926963
Emr	Urban	1992	0.135216	0.20825	0.326649
Eur	Urban	1992	0.0127641	0.0256763	0.0595232
Sear	Urban	1992	0.620749	0.698252	0.766199
Wpr	Urban	1992	0.100379	0.269464	0.522151
Afr	Urban	1993	0.626178	0.682297	0.72586
Amr	Urban	1993	0.0451302	0.0612626	0.0887161
Emr	Urban	1993	0.135283	0.202645	0.302702
Eur	Urban	1993	0.0122476	0.0241543	0.0542437
Sear	Urban	1993	0.61237	0.687379	0.75687
Wpr	Urban	1993	0.104506	0.269929	0.508503
Afr	Urban	1994	0.635455	0.683428	0.725051
Amr	Urban	1994	0.0430844	0.0583291	0.0830823
Emr	Urban	1994	0.136216	0.195217	0.28404
Eur	Urban	1994	0.0109601	0.0225015	0.0503703
Sear	Urban	1994	0.600139	0.674829	0.747089
Wpr	Urban	1994	0.106193	0.269428	0.490473
Afr	Urban	1995	0.638123	0.684183	0.722278
Amr	Urban	1995	0.0410001	0.055609	0.0816135
Emr	Urban	1995	0.13522	0.189123	0.270667
Eur	Urban	1995	0.010855	0.0208621	0.0455565
Sear	Urban	1995	0.586691	0.662879	0.734243
Wpr	Urban	1995	0.109569	0.266952	0.466508
Afr	Urban	1996	0.642168	0.684194	0.720051
Amr	Urban	1996	0.0392361	0.0524034	0.0745039
Emr	Urban	1996	0.132707	0.182825	0.258634
Eur	Urban	1996	0.0102371	0.0195711	0.0419924
Sear	Urban	1996	0.571865	0.650692	0.723029
Wpr	Urban	1996	0.119135	0.267258	0.454508
Afr	Urban	1997	0.647066	0.68542	0.718172
Amr	Urban	1997	0.037455	0.0497494	0.0723611
Emr	Urban	1997	0.131041	0.176222	0.243562
Eur	Urban	1997	0.00988752	0.0179411	0.0394846
Sear	Urban	1997	0.557553	0.637715	0.710172
Wpr	Urban	1997	0.114742	0.264125	0.438097
Afr	Urban	1998	0.650918	0.685332	0.716553
Amr	Urban	1998	0.0355815	0.0476927	0.069651
Emr	Urban	1998	0.128173	0.17102	0.229361
Eur	Urban	1998	0.00939843	0.0169338	0.0352016
Sear	Urban	1998	0.545355	0.620264	0.695852
Wpr	Urban	1998	0.123745	0.260304	0.416178
Afr	Urban	1999	0.654425	0.685757	0.716243
Amr	Urban	1999	0.033795	0.044729	0.0664546
Emr	Urban	1999	0.125506	0.164765	0.222233
Eur	Urban	1999	0.00879312	0.0156918	0.0337256
Sear	Urban	1999	0.528252	0.606229	0.678982
Wpr	Urban	1999	0.121853	0.257418	0.402862
Afr	Urban	2000	0.656101	0.685686	0.714761
Amr	Urban	2000	0.0323545	0.0427467	0.0646148
Emr	Urban	2000	0.122114	0.157759	0.208215
Eur	Urban	2000	0.00848729	0.014754	0.0301807
Sear	Urban	2000	0.512769	0.588606	0.665271
Wpr	Urban	2000	0.120891	0.252757	0.391836
Afr	Urban	2001	0.658074	0.6855	0.713253
Amr	Urban	2001	0.0309492	0.0408957	0.0619085
Emr	Urban	2001	0.117461	0.151579	0.198291
Eur	Urban	2001	0.00794512	0.0138077	0.0286372
Sear	Urban	2001	0.494868	0.571255	0.649395
Wpr	Urban	2001	0.125179	0.246578	0.386251
Afr	Urban	2002	0.659046	0.685428	0.711572
Amr	Urban	2002	0.0293895	0.0392156	0.0600824
Emr	Urban	2002	0.113159	0.145383	0.188333
Eur	Urban	2002	0.00770287	0.0130948	0.028636
Sear	Urban	2002	0.475708	0.552023	0.62825
Wpr	Urban	2002	0.122228	0.242389	0.375048
Afr	Urban	2003	0.660558	0.685448	0.711221
Amr	Urban	2003	0.0285185	0.0382758	0.0583094
Emr	Urban	2003	0.108425	0.138818	0.180766
Eur	Urban	2003	0.00725776	0.0124392	0.0290683
Sear	Urban	2003	0.455886	0.533216	0.612323
Wpr	Urban	2003	0.115404	0.237638	0.368358
Afr	Urban	2004	0.660359	0.684604	0.708267
Amr	Urban	2004	0.0274617	0.0367708	0.0560893
Emr	Urban	2004	0.102182	0.132398	0.171543
Eur	Urban	2004	0.00695471	0.0119458	0.028447
Sear	Urban	2004	0.434759	0.513269	0.59536
Wpr	Urban	2004	0.105539	0.229769	0.359815
Afr	Urban	2005	0.661195	0.683813	0.707862
Amr	Urban	2005	0.0268052	0.0360013	0.055497
Emr	Urban	2005	0.0973235	0.124511	0.161395
Eur	Urban	2005	0.00676562	0.0115158	0.028639
Sear	Urban	2005	0.413899	0.493226	0.578004
Wpr	Urban	2005	0.109751	0.223546	0.35645
Afr	Urban	2006	0.662108	0.683336	0.706221
Amr	Urban	2006	0.0262346	0.0350808	0.0551181
Emr	Urban	2006	0.0911776	0.11719	0.154503
Eur	Urban	2006	0.00652368	0.0115012	0.0313478
Sear	Urban	2006	0.390611	0.468156	0.549353
Wpr	Urban	2006	0.10344	0.218354	0.352755
Afr	Urban	2007	0.661607	0.682604	0.703742
Amr	Urban	2007	0.0258439	0.0344481	0.0535474
Emr	Urban	2007	0.0833332	0.108023	0.141828
Eur	Urban	2007	0.00643318	0.0112	0.0324769
Sear	Urban	2007	0.360685	0.441526	0.525427
Wpr	Urban	2007	0.100476	0.210363	0.345162
Afr	Urban	2008	0.662163	0.681875	0.703581
Amr	Urban	2008	0.0253226	0.0337686	0.0523621
Emr	Urban	2008	0.0781212	0.101514	0.134629
Eur	Urban	2008	0.00621765	0.0114618	0.0355894
Sear	Urban	2008	0.3355	0.413626	0.497809
Wpr	Urban	2008	0.0943063	0.205604	0.342687
Afr	Urban	2009	0.661083	0.681118	0.702848
Amr	Urban	2009	0.0251363	0.0336454	0.0512193
Emr	Urban	2009	0.0734108	0.0962099	0.128557
Eur	Urban	2009	0.00616464	0.011811	0.0406276
Sear	Urban	2009	0.311074	0.387056	0.476127
Wpr	Urban	2009	0.0940038	0.199173	0.333059
Afr	Urban	2010	0.659535	0.679535	0.700107
Amr	Urban	2010	0.0250704	0.03335	0.0503987
Emr	Urban	2010	0.0681876	0.0910595	0.122896
Eur	Urban	2010	0.0060996	0.012159	0.0448513
Sear	Urban	2010	0.285604	0.361621	0.44997
Wpr	Urban	2010	0.0864673	0.191908	0.330198
Afr	Urban	2011	0.658126	0.67809	0.69918
Amr	Urban	2011	0.0247959	0.0332446	0.0507465
Emr	Urban	2011	0.0660275	0.0871314	0.119518
Eur	Urban	2011	0.0060932	0.0130267	0.0478186
Sear	Urban	2011	0.261052	0.335957	0.423182
Wpr	Urban	2011	0.0819888	0.18636	0.334886
Afr	Urban	2012	0.655744	0.67565	0.695842
Amr	Urban	2012	0.0248344	0.0334019	0.0497101
Emr	Urban	2012	0.0625903	0.0840542	0.118308
Eur	Urban	2012	0.0058753	0.0137383	0.0571044
Sear	Urban	2012	0.236249	0.312838	0.40262
Wpr	Urban	2012	0.0723923	0.181171	0.337525
Afr	Urban	2013	0.652197	0.672423	0.692584
Amr	Urban	2013	0.0247232	0.0334256	0.0497462
Emr	Urban	2013	0.0605899	0.0819886	0.114396
Eur	Urban	2013	0.00610049	0.0148066	0.0627993
Sear	Urban	2013	0.218	0.291877	0.382421
Wpr	Urban	2013	0.0691568	0.17541	0.332668
Afr	Urban	2014	0.645566	0.667812	0.688604
Amr	Urban	2014	0.025003	0.0335761	0.050442
Emr	Urban	2014	0.0592533	0.0798988	0.114574
Eur	Urban	2014	0.00613278	0.0163192	0.0697417
Sear	Urban	2014	0.201632	0.270795	0.358247
Wpr	Urban	2014	0.0624473	0.170153	0.341359
Afr	Urban	2015	0.639084	0.662045	0.683325
Amr	Urban	2015	0.0246	0.0338212	0.0512307
Emr	Urban	2015	0.0575968	0.0791514	0.11545
Eur	Urban	2015	0.00626432	0.0174247	0.0799503
Sear	Urban	2015	0.182015	0.252198	0.344416
Wpr	Urban	2015	0.0615527	0.166654	0.351657
Afr	Urban	2016	0.630059	0.654303	0.677489
Amr	Urban	2016	0.0252178	0.034247	0.0520896
Emr	Urban	2016	0.0554779	0.07858	0.116693
Eur	Urban	2016	0.00606149	0.0193546	0.0851996
Sear	Urban	2016	0.16422	0.235778	0.341328
Wpr	Urban	2016	0.0521977	0.163751	0.366122
Afr	Urban	2017	0.619737	0.64729	0.672666
Amr	Urban	2017	0.0247795	0.0345338	0.0516169
Emr	Urban	2017	0.053967	0.0784045	0.119588
Eur	Urban	2017	0.00655958	0.0206992	0.0986298
Sear	Urban	2017	0.14864	0.22078	0.32546
Wpr	Urban	2017	0.0471254	0.157847	0.386118
Afr	Urban	2018	0.608805	0.637801	0.665961
Amr	Urban	2018	0.0250012	0.0348621	0.0536413
Emr	Urban	2018	0.0536783	0.0785504	0.12151
Eur	Urban	2018	0.00654446	0.0227492	0.112881
Sear	Urban	2018	0.130231	0.205281	0.32004
Wpr	Urban	2018	0.0425583	0.154189	0.397551
Afr	Urban	2019	0.59565	0.629909	0.661224
Amr	Urban	2019	0.0245103	0.0356839	0.0566727
Emr	Urban	2019	0.0521857	0.0795503	0.127745
Eur	Urban	2019	0.00676879	0.0251344	0.123017
Sear	Urban	2019	0.117825	0.192519	0.315821
Wpr	Urban	2019	0.037951	0.151204	0.418987
Afr	Urban	2020	0.583845	0.622509	0.658734
Amr	Urban	2020	0.0250863	0.0365657	0.0584161
Emr	Urban	2020	0.0512167	0.080193	0.132566
Eur	Urban	2020	0.0069998	0.0276507	0.130645
Sear	Urban	2020	0.10474	0.180805	0.312977
Wpr	Urban	2020	0.0343185	0.146902	0.441151
Afr	Urban	2021	0.576453	0.617667	0.656552
Amr	Urban	2021	0.025019	0.0378297	0.061569
Emr	Urban	2021	0.0500338	0.0815425	0.14032
Eur	Urban	2021	0.00737834	0.0299434	0.139429
Sear	Urban	2021	0.0959635	0.169441	0.315648
Wpr	Urban	2021	0.0306101	0.143678	0.470452
Afr	Urban	2022	0.567018	0.614145	0.65593
Amr	Urban	2022	0.0244676	0.0388815	0.0651218
Emr	Urban	2022	0.0492802	0.0829096	0.148072
Eur	Urban	2022	0.00795838	0.033763	0.147284
Sear	Urban	2022	0.0854761	0.15995	0.311969
Wpr	Urban	2022	0.0295887	0.141207	0.495863
Afr	Urban	2023	0.562558	0.612143	0.657849
Amr	Urban	2023	0.0253594	0.0406932	0.0688288
Emr	Urban	2023	0.0491022	0.0847874	0.158891
Eur	Urban	2023	0.00796289	0.0376376	0.158152
Sear	Urban	2023	0.0769652	0.150886	0.311959
Wpr	Urban	2023	0.0272099	0.13756	0.524548
Afr	Urban	2024	0.556439	0.611096	0.660458
Amr	Urban	2024	0.0250613	0.042008	0.0746132
Emr	Urban	2024	0.0478049	0.0869989	0.17093
Eur	Urban	2024	0.00822538	0.0411951	0.161745
Sear	Urban	2024	0.0705246	0.142326	0.316541
Wpr	Urban	2024	0.0250433	0.134646	0.530011
Afr	Urban	2025	0.553347	0.6118	0.665094
Amr	Urban	2025	0.0257181	0.0439158	0.0808903
Emr	Urban	2025	0.0479276	0.0889954	0.179481
Eur	Urban	2025	0.00881341	0.045437	0.165521
Sear	Urban	2025	0.0646662	0.134012	0.319236
Wpr	Urban	2025	0.0234728	0.132163	0.567742
Afr	Urban	2026	0.55075	0.613475	0.669641
Amr	Urban	2026	0.0254747	0.0459201	0.0864387
Emr	Urban	2026	0.0479856	0.0911337	0.188701
Eur	Urban	2026	0.00924096	0.0496961	0.17051
Sear	Urban	2026	0.0576322	0.127375	0.320571
Wpr	Urban	2026	0.0232192	0.134064	0.580078
Afr	Urban	2027	0.549899	0.616115	0.675317
Amr	Urban	2027	0.026011	0.0477344	0.0953409
Emr	Urban	2027	0.0486881	0.0933914	0.198168
Eur	Urban	2027	0.0101699	0.0543796	0.173094
Sear	Urban	2027	0.0541493	0.121833	0.327942
Wpr	Urban	2027	0.0208677	0.12923	0.598311
Afr	Urban	2028	0.549319	0.618729	0.680416
Amr	Urban	2028	0.026904	0.050072	0.101093
Emr	Urban	2028	0.0481001	0.0965884	0.20588
Eur	Urban	2028	0.0103954	0.0600301	0.176057
Sear	Urban	2028	0.0491135	0.115334	0.333106
Wpr	Urban	2028	0.0205034	0.127469	0.621095
Afr	Urban	2029	0.547761	0.621658	0.684893
Amr	Urban	2029	0.0274533	0.0530747	0.108709
Emr	Urban	2029	0.0472859	0.100212	0.222513
Eur	Urban	2029	0.0107931	0.0659459	0.179156
Sear	Urban	2029	0.0455292	0.111219	0.332212
Wpr	Urban	2029	0.0186196	0.128712	0.642288
Afr	Urban	2030	0.546289	0.626153	0.690558
Amr	Urban	2030	0.0278903	0.0550674	0.117537
Emr	Urban	2030	0.0488898	0.105011	0.2298
Eur	Urban	2030	0.0117524	0.0708649	0.183335
Sear	Urban	2030	0.0414142	0.105504	0.339127
Wpr	Urban	2030	0.0179293	0.126233	0.660149
Afr	Rural	1990	0.891173	0.933433	0.957263
Amr	Rural	1990	0.383876	0.444435	0.496192
Emr	Rural	1990	0.588027	0.68981	0.792655
Eur	Rural	1990	0.119619	0.170723	0.24227
Sear	Rural	1990	0.934195	0.962305	0.978908
Wpr	Rural	1990	0.255467	0.694074	0.934828
Afr	Rural	1991	0.898493	0.935752	0.956778
Amr	Rural	1991	0.382074	0.438991	0.491247
Emr	Rural	1991	0.592971	0.684502	0.783893
Eur	Rural	1991	0.118694	0.168641	0.235917
Sear	Rural	1991	0.933402	0.960697	0.977654
Wpr	Rural	1991	0.286942	0.705035	0.932407
Afr	Rural	1992	0.904172	0.937584	0.957005
Amr	Rural	1992	0.380895	0.433819	0.48192
Emr	Rural	1992	0.592338	0.680126	0.772984
Eur	Rural	1992	0.11769	0.165124	0.230225
Sear	Rural	1992	0.929761	0.958027	0.975268
Wpr	Rural	1992	0.324533	0.702204	0.926556
Afr	Rural	1993	0.909038	0.939093	0.957346
Amr	Rural	1993	0.377309	0.426471	0.475877
Emr	Rural	1993	0.59553	0.674393	0.758697
Eur	Rural	1993	0.117724	0.162727	0.223734
Sear	Rural	1993	0.928111	0.955232	0.972917
Wpr	Rural	1993	0.35017	0.704037	0.920799
Afr	Rural	1994	0.913855	0.940448	0.956379
Amr	Rural	1994	0.371672	0.420919	0.470771
Emr	Rural	1994	0.596516	0.668541	0.74735
Eur	Rural	1994	0.11612	0.159585	0.219966
Sear	Rural	1994	0.923847	0.95183	0.970676
Wpr	Rural	1994	0.382499	0.712996	0.919381
Afr	Rural	1995	0.916843	0.941723	0.956012
Amr	Rural	1995	0.367111	0.41452	0.462334
Emr	Rural	1995	0.595914	0.662646	0.736269
Eur	Rural	1995	0.115157	0.156047	0.215361
Sear	Rural	1995	0.918787	0.948883	0.968558
Wpr	Rural	1995	0.409528	0.719472	0.910671
Afr	Rural	1996	0.920224	0.942802	0.956857
Amr	Rural	1996	0.360913	0.407513	0.455765
Emr	Rural	1996	0.592006	0.653321	0.720585
Eur	Rural	1996	0.11366	0.153008	0.206507
Sear	Rural	1996	0.914073	0.945666	0.966238
Wpr	Rural	1996	0.42145	0.722782	0.90476
Afr	Rural	1997	0.924326	0.943781	0.955543
Amr	Rural	1997	0.35553	0.401333	0.44747
Emr	Rural	1997	0.588167	0.644261	0.705337
Eur	Rural	1997	0.110786	0.148937	0.199971
Sear	Rural	1997	0.907956	0.940721	0.962741
Wpr	Rural	1997	0.439976	0.724549	0.900587
Afr	Rural	1998	0.927486	0.944511	0.955522
Amr	Rural	1998	0.34881	0.39502	0.441994
Emr	Rural	1998	0.580991	0.633737	0.690127
Eur	Rural	1998	0.108988	0.14422	0.192256
Sear	Rural	1998	0.903601	0.936522	0.960264
Wpr	Rural	1998	0.465169	0.730983	0.890692
Afr	Rural	1999	0.928597	0.945002	0.955265
Amr	Rural	1999	0.344882	0.389602	0.433488
Emr	Rural	1999	0.573546	0.622501	0.67182
Eur	Rural	1999	0.104674	0.13937	0.186853
Sear	Rural	1999	0.895373	0.931325	0.956785
Wpr	Rural	1999	0.479258	0.734475	0.891217
Afr	Rural	2000	0.929889	0.945322	0.955214
Amr	Rural	2000	0.339567	0.382302	0.426175
Emr	Rural	2000	0.567769	0.612095	0.657176
Eur	Rural	2000	0.1027	0.133797	0.1775
Sear	Rural	2000	0.88904	0.926473	0.953311
Wpr	Rural	2000	0.486254	0.736704	0.885504
Afr	Rural	2001	0.931803	0.945209	0.954321
Amr	Rural	2001	0.331866	0.375091	0.418233
Emr	Rural	2001	0.559834	0.603	0.643876
Eur	Rural	2001	0.0993711	0.128056	0.171639
Sear	Rural	2001	0.882536	0.921887	0.949777
Wpr	Rural	2001	0.51002	0.738713	0.885967
Afr	Rural	2002	0.93208	0.945204	0.954236
Amr	Rural	2002	0.325309	0.36716	0.411485
Emr	Rural	2002	0.551253	0.593302	0.631621
Eur	Rural	2002	0.0962641	0.122499	0.165647
Sear	Rural	2002	0.873889	0.916622	0.946006
Wpr	Rural	2002	0.496056	0.737848	0.879751
Afr	Rural	2003	0.932617	0.944972	0.953953
Amr	Rural	2003	0.319006	0.360255	0.401888
Emr	Rural	2003	0.545245	0.585924	0.622669
Eur	Rural	2003	0.0924654	0.116845	0.157478
Sear	Rural	2003	0.867375	0.911167	0.943347
Wpr	Rural	2003	0.524065	0.741747	0.878879
Afr	Rural	2004	0.93272	0.944814	0.953538
Amr	Rural	2004	0.31436	0.354218	0.396463
Emr	Rural	2004	0.539753	0.578733	0.613675
Eur	Rural	2004	0.0886715	0.112134	0.154226
Sear	Rural	2004	0.861796	0.905843	0.937551
Wpr	Rural	2004	0.52687	0.736871	0.874031
Afr	Rural	2005	0.932011	0.944341	0.953003
Amr	Rural	2005	0.306948	0.347263	0.388349
Emr	Rural	2005	0.53244	0.572408	0.607578
Eur	Rural	2005	0.0850422	0.108066	0.148322
Sear	Rural	2005	0.852095	0.899464	0.9323
Wpr	Rural	2005	0.506565	0.735113	0.868894
Afr	Rural	2006	0.932529	0.944204	0.952993
Amr	Rural	2006	0.301159	0.340286	0.379741
Emr	Rural	2006	0.525185	0.565879	0.599759
Eur	Rural	2006	0.0823302	0.104812	0.147943
Sear	Rural	2006	0.840824	0.892348	0.927482
Wpr	Rural	2006	0.520564	0.731169	0.869794
Afr	Rural	2007	0.932461	0.943791	0.952655
Amr	Rural	2007	0.296802	0.334857	0.374473
Emr	Rural	2007	0.518329	0.560434	0.59279
Eur	Rural	2007	0.0790694	0.10227	0.145533
Sear	Rural	2007	0.832938	0.883308	0.919427
Wpr	Rural	2007	0.512794	0.72808	0.867947
Afr	Rural	2008	0.933209	0.943583	0.952002
Amr	Rural	2008	0.292718	0.328015	0.365191
Emr	Rural	2008	0.511942	0.553816	0.587857
Eur	Rural	2008	0.0774298	0.101175	0.150686
Sear	Rural	2008	0.824226	0.874263	0.912636
Wpr	Rural	2008	0.506961	0.721067	0.865937
Afr	Rural	2009	0.932276	0.943236	0.951613
Amr	Rural	2009	0.287336	0.322686	0.359166
Emr	Rural	2009	0.504504	0.547591	0.580929
Eur	Rural	2009	0.0750493	0.100013	0.154172
Sear	Rural	2009	0.808388	0.864365	0.905207
Wpr	Rural	2009	0.492299	0.714728	0.867328
Afr	Rural	2010	0.931871	0.943066	0.951675
Amr	Rural	2010	0.28257	0.316643	0.354663
Emr	Rural	2010	0.496742	0.541507	0.575933
Eur	Rural	2010	0.0740551	0.100059	0.155795
Sear	Rural	2010	0.793862	0.851655	0.895107
Wpr	Rural	2010	0.48983	0.704125	0.858148
Afr	Rural	2011	0.931386	0.942684	0.951022
Amr	Rural	2011	0.278192	0.310521	0.346789
Emr	Rural	2011	0.484051	0.534054	0.572079
Eur	Rural	2011	0.0721467	0.100582	0.158494
Sear	Rural	2011	0.776302	0.838862	0.883203
Wpr	Rural	2011	0.478346	0.694109	0.858119
Afr	Rural	2012	0.930537	0.942501	0.951637
Amr	Rural	2012	0.271845	0.304571	0.339272
Emr	Rural	2012	0.480152	0.528031	0.566802
Eur	Rural	2012	0.0721512	0.101366	0.168497
Sear	Rural	2012	0.759948	0.822824	0.873603
Wpr	Rural	2012	0.461481	0.683684	0.854781
Afr	Rural	2013	0.929947	0.942543	0.950905
Amr	Rural	2013	0.266296	0.297654	0.335044
Emr	Rural	2013	0.471322	0.52291	0.562914
Eur	Rural	2013	0.0721814	0.102872	0.180704
Sear	Rural	2013	0.741888	0.806522	0.861159
Wpr	Rural	2013	0.446901	0.673487	0.850498
Afr	Rural	2014	0.93031	0.942166	0.950826
Amr	Rural	2014	0.259518	0.291361	0.327388
Emr	Rural	2014	0.462496	0.516228	0.558742
Eur	Rural	2014	0.0722051	0.105627	0.184278
Sear	Rural	2014	0.719544	0.787036	0.849543
Wpr	Rural	2014	0.41459	0.660698	0.851987
Afr	Rural	2015	0.928911	0.941741	0.950732
Amr	Rural	2015	0.251882	0.283938	0.322884
Emr	Rural	2015	0.453268	0.508819	0.555266
Eur	Rural	2015	0.0707233	0.10862	0.193561
Sear	Rural	2015	0.687991	0.766159	0.834831
Wpr	Rural	2015	0.395729	0.650999	0.847403
Afr	Rural	2016	0.926992	0.941593	0.950703
Amr	Rural	2016	0.244251	0.276919	0.31748
Emr	Rural	2016	0.443847	0.501346	0.551987
Eur	Rural	2016	0.0701573	0.110765	0.205091
Sear	Rural	2016	0.656971	0.743386	0.82104
Wpr	Rural	2016	0.358179	0.637518	0.850676
Afr	Rural	2017	0.926895	0.9409	0.950654
Amr	Rural	2017	0.237008	0.269852	0.310666
Emr	Rural	2017	0.431951	0.493288	0.547689
Eur	Rural	2017	0.0712531	0.113344	0.212572
Sear	Rural	2017	0.61849	0.721757	0.811691
Wpr	Rural	2017	0.334539	0.624542	0.852489
Afr	Rural	2018	0.923443	0.940257	0.950645
Amr	Rural	2018	0.229063	0.263939	0.307425
Emr	Rural	2018	0.418342	0.485355	0.541457
Eur	Rural	2018	0.0722785	0.117511	0.221184
Sear	Rural	2018	0.579572	0.6964	0.800777
Wpr	Rural	2018	0.299172	0.615035	0.859057
Afr	Rural	2019	0.923212	0.939839	0.950974
Amr	Rural	2019	0.222549	0.258295	0.302414
Emr	Rural	2019	0.404809	0.476492	0.540335
Eur	Rural	2019	0.0707272	0.121358	0.2309
Sear	Rural	2019	0.530455	0.673165	0.792605
Wpr	Rural	2019	0.268119	0.602865	0.853612
Afr	Rural	2020	0.919751	0.938677	0.950813
Amr	Rural	2020	0.214688	0.251682	0.30002
Emr	Rural	2020	0.388369	0.465529	0.538094
Eur	Rural	2020	0.0708104	0.12505	0.240024
Sear	Rural	2020	0.479596	0.645202	0.786429
Wpr	Rural	2020	0.238916	0.588173	0.854681
Afr	Rural	2021	0.916037	0.937869	0.951111
Amr	Rural	2021	0.205203	0.246691	0.29952
Emr	Rural	2021	0.366729	0.456994	0.533448
Eur	Rural	2021	0.0705162	0.128737	0.244292
Sear	Rural	2021	0.440183	0.621351	0.774091
Wpr	Rural	2021	0.224227	0.582638	0.853088
Afr	Rural	2022	0.914456	0.936792	0.951042
Amr	Rural	2022	0.198143	0.241583	0.297345
Emr	Rural	2022	0.348837	0.445376	0.530818
Eur	Rural	2022	0.0723224	0.131674	0.251002
Sear	Rural	2022	0.393987	0.595568	0.773481
Wpr	Rural	2022	0.198894	0.567126	0.857682
Afr	Rural	2023	0.909653	0.935324	0.951064
Amr	Rural	2023	0.189971	0.236789	0.296423
Emr	Rural	2023	0.325789	0.433725	0.529254
Eur	Rural	2023	0.0715872	0.136	0.259292
Sear	Rural	2023	0.35141	0.56893	0.770556
Wpr	Rural	2023	0.185255	0.552506	0.855576
Afr	Rural	2024	0.906094	0.934343	0.950988
Amr	Rural	2024	0.18329	0.232009	0.29838
Emr	Rural	2024	0.308183	0.422533	0.527323
Eur	Rural	2024	0.0715941	0.140863	0.267792
Sear	Rural	2024	0.309417	0.541549	0.764253
Wpr	Rural	2024	0.166451	0.540773	0.851569
Afr	Rural	2025	0.900854	0.93372	0.951575
Amr	Rural	2025	0.178622	0.228281	0.294241
Emr	Rural	2025	0.286269	0.411619	0.524046
Eur	Rural	2025	0.0719203	0.145509	0.273523
Sear	Rural	2025	0.276411	0.516399	0.760916
Wpr	Rural	2025	0.158924	0.530954	0.849365
Afr	Rural	2026	0.894076	0.932205	0.951272
Amr	Rural	2026	0.17057	0.224801	0.297659
Emr	Rural	2026	0.269104	0.401538	0.521523
Eur	Rural	2026	0.0725658	0.150064	0.280726
Sear	Rural	2026	0.247638	0.488134	0.7557
Wpr	Rural	2026	0.147212	0.518749	0.850041
Afr	Rural	2027	0.889296	0.930976	0.952014
Amr	Rural	2027	0.167035	0.222095	0.295492
Emr	Rural	2027	0.249335	0.390665	0.521271
Eur	Rural	2027	0.0736116	0.154277	0.28688
Sear	Rural	2027	0.218322	0.464828	0.749096
Wpr	Rural	2027	0.13788	0.506414	0.847353
Afr	Rural	2028	0.883998	0.930191	0.951808
Amr	Rural	2028	0.160035	0.218389	0.298549
Emr	Rural	2028	0.23108	0.380541	0.516898
Eur	Rural	2028	0.0745555	0.158666	0.293411
Sear	Rural	2028	0.195558	0.438898	0.754072
Wpr	Rural	2028	0.134598	0.494218	0.845064
Afr	Rural	2029	0.878549	0.928058	0.952157
Amr	Rural	2029	0.15615	0.216706	0.300406
Emr	Rural	2029	0.214146	0.37061	0.515249
Eur	Rural	2029	0.0739992	0.162844	0.297929
Sear	Rural	2029	0.171741	0.412203	0.741506
Wpr	Rural	2029	0.128908	0.484308	0.842484
Afr	Rural	2030	0.868557	0.926764	0.952511
Amr	Rural	2030	0.15213	0.214328	0.303933
Emr	Rural	2030	0.201873	0.358956	0.513989
Eur	Rural	2030	0.0754844	0.167725	0.302495
Sear	Rural	2030	0.158221	0.389816	0.736645
Wpr	Rural	2030	0.121613	0.47037	0.842519
Afr	Overall	1990	0.823603	0.85954	0.885566
Amr	Overall	1990	0.152491	0.183376	0.218644
Emr	Overall	1990	0.397409	0.485185	0.575111
Eur	Overall	1990	0.0531137	0.0769302	0.11241
Sear	Overall	1990	0.808676	0.886805	0.938413
Wpr	Overall	1990	0.261504	0.536663	0.756467
Afr	Overall	1991	0.828608	0.860532	0.884098
Amr	Overall	1991	0.147997	0.176522	0.211096
Emr	Overall	1991	0.399167	0.477366	0.563479
Eur	Overall	1991	0.0526657	0.0746831	0.10733
Sear	Overall	1991	0.799756	0.880074	0.933987
Wpr	Overall	1991	0.279522	0.535197	0.752135
Afr	Overall	1992	0.832678	0.861163	0.882637
Amr	Overall	1992	0.142523	0.170343	0.203876
Emr	Overall	1992	0.39727	0.469948	0.550111
Eur	Overall	1992	0.0520917	0.0721327	0.104429
Sear	Overall	1992	0.796649	0.873921	0.930239
Wpr	Overall	1992	0.297629	0.538852	0.731537
Afr	Overall	1993	0.83515	0.861987	0.88212
Amr	Overall	1993	0.137673	0.16361	0.194734
Emr	Overall	1993	0.390484	0.463286	0.537214
Eur	Overall	1993	0.05015	0.0696117	0.100427
Sear	Overall	1993	0.786706	0.867031	0.925628
Wpr	Overall	1993	0.311934	0.535055	0.718508
Afr	Overall	1994	0.839237	0.862246	0.880448
Amr	Overall	1994	0.133509	0.158045	0.188484
Emr	Overall	1994	0.389714	0.456602	0.526795
Eur	Overall	1994	0.0487517	0.0674706	0.0950236
Sear	Overall	1994	0.774745	0.858813	0.917995
Wpr	Overall	1994	0.333771	0.535523	0.710237
Afr	Overall	1995	0.840107	0.86229	0.879135
Amr	Overall	1995	0.12821	0.152389	0.182947
Emr	Overall	1995	0.387051	0.448146	0.512366
Eur	Overall	1995	0.0476729	0.0646954	0.0923641
Sear	Overall	1995	0.765209	0.852165	0.913627
Wpr	Overall	1995	0.355102	0.535205	0.705271
Afr	Overall	1996	0.842352	0.862536	0.878123
Amr	Overall	1996	0.123552	0.146305	0.176296
Emr	Overall	1996	0.383989	0.44023	0.498562
Eur	Overall	1996	0.0462974	0.0626805	0.0889755
Sear	Overall	1996	0.752182	0.842619	0.910171
Wpr	Overall	1996	0.362535	0.531513	0.704239
Afr	Overall	1997	0.843871	0.862226	0.876932
Amr	Overall	1997	0.119093	0.14035	0.168763
Emr	Overall	1997	0.37272	0.431751	0.487157
Eur	Overall	1997	0.0450641	0.0602812	0.0838553
Sear	Overall	1997	0.741938	0.833939	0.905105
Wpr	Overall	1997	0.371864	0.529413	0.691855
Afr	Overall	1998	0.845417	0.862054	0.876001
Amr	Overall	1998	0.113232	0.135396	0.16337
Emr	Overall	1998	0.369109	0.421088	0.473456
Eur	Overall	1998	0.043464	0.0577356	0.080859
Sear	Overall	1998	0.726746	0.822147	0.897447
Wpr	Overall	1998	0.37941	0.527347	0.680919
Afr	Overall	1999	0.84551	0.861475	0.874815
Amr	Overall	1999	0.109769	0.129945	0.157008
Emr	Overall	1999	0.358477	0.411696	0.462162
Eur	Overall	1999	0.0416797	0.0551311	0.0767904
Sear	Overall	1999	0.716218	0.813362	0.89136
Wpr	Overall	1999	0.380408	0.523446	0.670884
Afr	Overall	2000	0.846407	0.860646	0.872992
Amr	Overall	2000	0.104407	0.124815	0.151213
Emr	Overall	2000	0.351614	0.403163	0.451132
Eur	Overall	2000	0.0400383	0.05259	0.0721641
Sear	Overall	2000	0.69835	0.802324	0.881214
Wpr	Overall	2000	0.381171	0.517724	0.662547
Afr	Overall	2001	0.845682	0.859795	0.871727
Amr	Overall	2001	0.100044	0.120341	0.147262
Emr	Overall	2001	0.343884	0.392932	0.439391
Eur	Overall	2001	0.0383946	0.0501087	0.0705742
Sear	Overall	2001	0.68904	0.789217	0.876802
Wpr	Overall	2001	0.372945	0.509949	0.6514
Afr	Overall	2002	0.845363	0.858538	0.869735
Amr	Overall	2002	0.0976527	0.116274	0.14224
Emr	Overall	2002	0.335977	0.384798	0.429891
Eur	Overall	2002	0.0362559	0.0474723	0.067845
Sear	Overall	2002	0.670186	0.778309	0.867252
Wpr	Overall	2002	0.374535	0.503885	0.640716
Afr	Overall	2003	0.844544	0.856955	0.86846
Amr	Overall	2003	0.0940366	0.112636	0.138159
Emr	Overall	2003	0.330238	0.376386	0.41994
Eur	Overall	2003	0.0348507	0.0451972	0.0651854
Sear	Overall	2003	0.653342	0.764842	0.863831
Wpr	Overall	2003	0.370917	0.495375	0.64444
Afr	Overall	2004	0.842799	0.855543	0.86636
Amr	Overall	2004	0.0911006	0.108635	0.133679
Emr	Overall	2004	0.321274	0.368871	0.411947
Eur	Overall	2004	0.0332076	0.0431006	0.06532
Sear	Overall	2004	0.638194	0.754031	0.851909
Wpr	Overall	2004	0.36362	0.487588	0.630006
Afr	Overall	2005	0.841615	0.854081	0.86517
Amr	Overall	2005	0.0881058	0.105548	0.129383
Emr	Overall	2005	0.311508	0.361008	0.404903
Eur	Overall	2005	0.0314532	0.0414107	0.062888
Sear	Overall	2005	0.622588	0.742617	0.839703
Wpr	Overall	2005	0.349715	0.478414	0.620611
Afr	Overall	2006	0.840046	0.852107	0.863152
Amr	Overall	2006	0.0855146	0.1019	0.126529
Emr	Overall	2006	0.301018	0.35195	0.396532
Eur	Overall	2006	0.0302961	0.0401079	0.0643736
Sear	Overall	2006	0.600624	0.72578	0.83334
Wpr	Overall	2006	0.340519	0.467352	0.603672
Afr	Overall	2007	0.838227	0.850588	0.860976
Amr	Overall	2007	0.0833185	0.0993406	0.123903
Emr	Overall	2007	0.29556	0.343183	0.38706
Eur	Overall	2007	0.0293102	0.0392173	0.0658037
Sear	Overall	2007	0.585992	0.711013	0.817575
Wpr	Overall	2007	0.332439	0.458215	0.597315
Afr	Overall	2008	0.837206	0.848936	0.859301
Amr	Overall	2008	0.0806197	0.0968553	0.119574
Emr	Overall	2008	0.285736	0.336187	0.379915
Eur	Overall	2008	0.0285411	0.0383734	0.0673498
Sear	Overall	2008	0.569923	0.695735	0.804785
Wpr	Overall	2008	0.309815	0.445073	0.582114
Afr	Overall	2009	0.834832	0.847217	0.858023
Amr	Overall	2009	0.0788286	0.0944148	0.116852
Emr	Overall	2009	0.278647	0.327512	0.371618
Eur	Overall	2009	0.0275437	0.0385226	0.0701839
Sear	Overall	2009	0.548957	0.676513	0.78738
Wpr	Overall	2009	0.307013	0.436139	0.573988
Afr	Overall	2010	0.832993	0.845083	0.856205
Amr	Overall	2010	0.0766565	0.0923734	0.113065
Emr	Overall	2010	0.271613	0.320906	0.364603
Eur	Overall	2010	0.0271756	0.0389025	0.0725874
Sear	Overall	2010	0.530682	0.659129	0.772785
Wpr	Overall	2010	0.294482	0.424296	0.560807
Afr	Overall	2011	0.830122	0.843314	0.854401
Amr	Overall	2011	0.0752941	0.0901653	0.111561
Emr	Overall	2011	0.265718	0.315183	0.361458
Eur	Overall	2011	0.0265767	0.039161	0.0754159
Sear	Overall	2011	0.511063	0.643187	0.761716
Wpr	Overall	2011	0.282526	0.413726	0.554705
Afr	Overall	2012	0.828087	0.840961	0.852704
Amr	Overall	2012	0.0735367	0.0878196	0.109573
Emr	Overall	2012	0.261303	0.309283	0.357362
Eur	Overall	2012	0.0268237	0.040374	0.0801465
Sear	Overall	2012	0.488877	0.623484	0.741935
Wpr	Overall	2012	0.269686	0.399866	0.548143
Afr	Overall	2013	0.825281	0.838398	0.849699
Amr	Overall	2013	0.0713047	0.0859884	0.106897
Emr	Overall	2013	0.25261	0.303588	0.350202
Eur	Overall	2013	0.0267906	0.041687	0.0886829
Sear	Overall	2013	0.467597	0.601349	0.727079
Wpr	Overall	2013	0.252978	0.387307	0.542896
Afr	Overall	2014	0.821192	0.835493	0.847418
Amr	Overall	2014	0.0699999	0.0837789	0.104313
Emr	Overall	2014	0.248421	0.299643	0.346217
Eur	Overall	2014	0.0270353	0.0434864	0.0943153
Sear	Overall	2014	0.445912	0.581815	0.710555
Wpr	Overall	2014	0.2413	0.375578	0.5291
Afr	Overall	2015	0.817253	0.831828	0.844255
Amr	Overall	2015	0.067809	0.0820712	0.103967
Emr	Overall	2015	0.240965	0.29383	0.343719
Eur	Overall	2015	0.0269854	0.0449653	0.0991837
Sear	Overall	2015	0.426794	0.563339	0.694098
Wpr	Overall	2015	0.226262	0.367812	0.529499
Afr	Overall	2016	0.811565	0.827828	0.841201
Amr	Overall	2016	0.0662763	0.0805254	0.100349
Emr	Overall	2016	0.237873	0.288431	0.337504
Eur	Overall	2016	0.0271816	0.0470191	0.109872
Sear	Overall	2016	0.397272	0.538673	0.681579
Wpr	Overall	2016	0.214096	0.354256	0.52263
Afr	Overall	2017	0.805931	0.823077	0.837956
Amr	Overall	2017	0.0645643	0.0788963	0.0997156
Emr	Overall	2017	0.230059	0.284141	0.336336
Eur	Overall	2017	0.0273909	0.0496232	0.117515
Sear	Overall	2017	0.372593	0.517862	0.661249
Wpr	Overall	2017	0.19112	0.344727	0.522064
Afr	Overall	2018	0.799585	0.817926	0.834307
Amr	Overall	2018	0.0632128	0.0775414	0.098973
Emr	Overall	2018	0.221273	0.279148	0.330841
Eur	Overall	2018	0.0280204	0.0515417	0.125829
Sear	Overall	2018	0.347458	0.497155	0.641401
Wpr	Overall	2018	0.174539	0.33263	0.525401
Afr	Overall	2019	0.792656	0.812908	0.830842
Amr	Overall	2019	0.0615298	0.0765938	0.0979653
Emr	Overall	2019	0.214867	0.272894	0.329531
Eur	Overall	2019	0.0279821	0.0544857	0.130316
Sear	Overall	2019	0.32497	0.477273	0.624636
Wpr	Overall	2019	0.164824	0.322695	0.522907
Afr	Overall	2020	0.785192	0.808458	0.827684
Amr	Overall	2020	0.0603206	0.0758367	0.0983099
Emr	Overall	2020	0.207604	0.268552	0.329252
Eur	Overall	2020	0.0291684	0.0573306	0.142517
Sear	Overall	2020	0.302119	0.454144	0.611915
Wpr	Overall	2020	0.144818	0.317591	0.532532
Afr	Overall	2021	0.77989	0.804101	0.825694
Amr	Overall	2021	0.0589572	0.0754336	0.0999568
Emr	Overall	2021	0.198566	0.263607	0.326692
Eur	Overall	2021	0.0291075	0.0619339	0.148428
Sear	Overall	2021	0.274762	0.431208	0.601565
Wpr	Overall	2021	0.132088	0.304637	0.536861
Afr	Overall	2022	0.773425	0.800127	0.8238
Amr	Overall	2022	0.0576925	0.0749885	0.10081
Emr	Overall	2022	0.190627	0.257508	0.323873
Eur	Overall	2022	0.0300137	0.0650488	0.15485
Sear	Overall	2022	0.251925	0.410286	0.586407
Wpr	Overall	2022	0.12414	0.298728	0.549407
Afr	Overall	2023	0.767903	0.797447	0.822203
Amr	Overall	2023	0.0570719	0.0747785	0.104408
Emr	Overall	2023	0.180743	0.252554	0.322582
Eur	Overall	2023	0.0303767	0.0689587	0.163768
Sear	Overall	2023	0.218341	0.390941	0.577708
Wpr	Overall	2023	0.113282	0.288307	0.557869
Afr	Overall	2024	0.761837	0.794567	0.821895
Amr	Overall	2024	0.0563382	0.0751287	0.106277
Emr	Overall	2024	0.175289	0.247898	0.322644
Eur	Overall	2024	0.0307393	0.0731572	0.170252
Sear	Overall	2024	0.203878	0.369576	0.572649
Wpr	Overall	2024	0.105326	0.285441	0.567588
Afr	Overall	2025	0.75723	0.792375	0.82161
Amr	Overall	2025	0.0554102	0.0756794	0.108994
Emr	Overall	2025	0.164989	0.242762	0.324141
Eur	Overall	2025	0.0322823	0.0775318	0.17652
Sear	Overall	2025	0.18901	0.351891	0.563889
Wpr	Overall	2025	0.0960101	0.279517	0.573279
Afr	Overall	2026	0.753876	0.790247	0.82116
Amr	Overall	2026	0.0547564	0.0758392	0.113762
Emr	Overall	2026	0.159431	0.237417	0.322868
Eur	Overall	2026	0.0322272	0.0817564	0.182221
Sear	Overall	2026	0.1636	0.331479	0.543771
Wpr	Overall	2026	0.0922781	0.271282	0.590447
Afr	Overall	2027	0.749064	0.788931	0.820357
Amr	Overall	2027	0.0544988	0.0771359	0.120028
Emr	Overall	2027	0.150225	0.233623	0.321268
Eur	Overall	2027	0.0329586	0.0855948	0.187603
Sear	Overall	2027	0.149003	0.315913	0.546327
Wpr	Overall	2027	0.0823285	0.263214	0.594139
Afr	Overall	2028	0.743982	0.786978	0.821562
Amr	Overall	2028	0.0542816	0.0781429	0.125476
Emr	Overall	2028	0.144493	0.229427	0.321099
Eur	Overall	2028	0.0348842	0.0900663	0.192424
Sear	Overall	2028	0.135417	0.299948	0.531599
Wpr	Overall	2028	0.0789871	0.259652	0.604655
Afr	Overall	2029	0.740388	0.785541	0.822454
Amr	Overall	2029	0.0532467	0.0795042	0.130357
Emr	Overall	2029	0.136012	0.225675	0.321792
Eur	Overall	2029	0.0348944	0.0972216	0.192514
Sear	Overall	2029	0.122559	0.282885	0.529414
Wpr	Overall	2029	0.0753848	0.257974	0.622586
Afr	Overall	2030	0.735935	0.784368	0.821375
Amr	Overall	2030	0.0532253	0.0816576	0.133605
Emr	Overall	2030	0.131262	0.221571	0.327346
Eur	Overall	2030	0.0367158	0.100561	0.19753
Sear	Overall	2030	0.111274	0.267287	0.522818
Wpr	Overall	2030	0.0692091	0.250265	0.631394

## Sheet: Polluting (Population)
region	area	year	population_lower95	population_median	population_upper95
Afr	Urban	1990	88247.9	99170.4	107210
Amr	Urban	1990	26012.5	37532.7	54895
Emr	Urban	1990	21313.3	36296.6	57213.5
Eur	Urban	1990	7824.89	16563.9	37619.6
Sear	Urban	1990	217936	246612	271758
Wpr	Urban	1990	46558.9	137687	284809
Afr	Urban	1991	93053.1	103612	111683
Amr	Urban	1991	25625.9	36079.7	52159
Emr	Urban	1991	22295.7	36410.7	55846.3
Eur	Urban	1991	7545.08	15635.6	35628.4
Sear	Urban	1991	223958	251365	276524
Wpr	Urban	1991	49801.4	143475	289810
Afr	Urban	1992	98420.3	108299	115951
Amr	Urban	1992	24958.9	34893.5	49782.1
Emr	Urban	1992	23567.3	36296.6	56932.7
Eur	Urban	1992	7273.14	14630.6	33917.1
Sear	Urban	1992	226843	255166	279996
Wpr	Urban	1992	55347.7	148578	287906
Afr	Urban	1993	103812	113116	120338
Amr	Urban	1993	24749.9	33597	48652.8
Emr	Urban	1993	24345.3	36467.6	54473.7
Eur	Urban	1993	7013.13	13831	31060.6
Sear	Urban	1993	230825	259098	285292
Wpr	Urban	1993	59517.2	153727	289597
Afr	Urban	1994	109741	118026	125214
Amr	Urban	1994	24125.8	32662.3	46523.3
Emr	Urban	1994	25255.5	36194.7	52663.1
Eur	Urban	1994	6304.27	12942.8	28973
Sear	Urban	1994	233254	262284	290369
Wpr	Urban	1994	62410.2	158343	288252
Afr	Urban	1995	114647	122923	129767
Amr	Urban	1995	23438.8	31790.3	46656.5
Emr	Urban	1995	25798.8	36083.1	51641
Eur	Urban	1995	6268.87	12048.1	26309.4
Sear	Urban	1995	235051	265574	294165
Wpr	Urban	1995	66400.7	161777	282711
Afr	Urban	1996	119922	127770	134466
Amr	Urban	1996	22893.6	30576.6	43471.9
Emr	Urban	1996	26043	35878.4	50755.5
Eur	Urban	1996	5932.69	11342	24335.8
Sear	Urban	1996	236104	268649	298514
Wpr	Urban	1996	74373.3	166843	283739
Afr	Urban	1997	125549	132990	139345
Amr	Urban	1997	22305.5	29627.2	43093.1
Emr	Urban	1997	26447.2	35565.7	49156.4
Eur	Urban	1997	5747.38	10428.7	22951.5
Sear	Urban	1997	237138	271232	302050
Wpr	Urban	1997	73717.2	169690	281460
Afr	Urban	1998	131122	138054	144343
Amr	Urban	1998	21619.8	28978.8	42321
Emr	Urban	1998	26600.6	35492.9	47600.8
Eur	Urban	1998	5478.45	9870.87	20519.4
Sear	Urban	1998	238868	271679	304786
Wpr	Urban	1998	81764.7	171996	274989
Afr	Urban	1999	136838	143389	149764
Amr	Urban	1999	20937.5	27711.6	41171.5
Emr	Urban	1999	26768.3	35141.7	47398.8
Eur	Urban	1999	5140.89	9174.18	19717.6
Sear	Urban	1999	238189	273349	306153
Wpr	Urban	1999	82766.5	174846	273636
Afr	Urban	2000	142397	148818	155128
Amr	Urban	2000	20420.7	26979.8	40782
Emr	Urban	2000	26754.5	34564.3	45619
Eur	Urban	2000	4979.31	8655.85	17706.4
Sear	Urban	2000	238002	273202	308785
Wpr	Urban	2000	84392.4	176447	273536
Afr	Urban	2001	148532	154722	160986
Amr	Urban	2001	19859	26241.4	39724.5
Emr	Urban	2001	26425	34100.2	44609
Eur	Urban	2001	4680.65	8134.4	16870.8
Sear	Urban	2001	236377	272863	310188
Wpr	Urban	2001	90284.2	177843	278581
Afr	Urban	2002	154735	160929	167068
Amr	Urban	2002	19153.9	25557.8	39157.2
Emr	Urban	2002	26128.2	33568.6	43485.6
Eur	Urban	2002	4561.38	7754.28	16957.3
Sear	Urban	2002	234189	271759	309285
Wpr	Urban	2002	91252.4	180961	280000
Afr	Urban	2003	161311	167389	173683
Amr	Urban	2003	18868.8	25324.5	38579.4
Emr	Urban	2003	25699.1	32903	42845.5
Eur	Urban	2003	4322.3	7408.05	17311.4
Sear	Urban	2003	231206	270425	310544
Wpr	Urban	2003	89113.8	183502	284443
Afr	Urban	2004	167755	173915	179926
Amr	Urban	2004	18441.1	24692.3	37665
Emr	Urban	2004	24875.1	32230.9	41760.2
Eur	Urban	2004	4166.81	7157.12	17043.6
Sear	Urban	2004	227042	268042	310912
Wpr	Urban	2004	84230.9	183379	287169
Afr	Urban	2005	174797	180776	187134
Amr	Urban	2005	18268.4	24535.7	37822.5
Emr	Urban	2005	24364.3	31170.5	40404.3
Eur	Urban	2005	4079.02	6942.95	17266.6
Sear	Urban	2005	222448	265082	310645
Wpr	Urban	2005	90454.4	184242	293779
Afr	Urban	2006	182137	187977	194272
Amr	Urban	2006	18146.7	24265.6	38125.6
Emr	Urban	2006	23494.2	30196.9	39811.5
Eur	Urban	2006	3958.81	6979.36	19023
Sear	Urban	2006	215941	258810	303699
Wpr	Urban	2006	87889.3	185528	299725
Afr	Urban	2007	189415	195427	201478
Amr	Urban	2007	18143.7	24184.3	37592.9
Emr	Urban	2007	22075.2	28615.7	37570.6
Eur	Urban	2007	3930.16	6842.29	19840.8
Sear	Urban	2007	205000	250947	298634
Wpr	Urban	2007	87914.3	184063	302009
Afr	Urban	2008	197458	203336	209809
Amr	Urban	2008	18040.6	24057.9	37304.5
Emr	Urban	2008	21314	27696.2	36731.2
Eur	Urban	2008	3824.51	7050.22	21891.3
Sear	Urban	2008	195951	241581	290748
Wpr	Urban	2008	84926.8	185155	308604
Afr	Urban	2009	205343	211567	218316
Amr	Urban	2009	18167.2	24317.1	37018.6
Emr	Urban	2009	20622.5	27027.2	36114.2
Eur	Urban	2009	3817.85	7314.75	25161.3
Sear	Urban	2009	186612	232194	285627
Wpr	Urban	2009	87076.6	184496	308516
Afr	Urban	2010	213416	219888	226545
Amr	Urban	2010	18375.1	24443.5	36939.2
Emr	Urban	2010	19712.6	26324.7	35528.4
Eur	Urban	2010	3802.79	7580.5	27962.5
Sear	Urban	2010	175892	222708	277119
Wpr	Urban	2010	82349	182768	314471
Afr	Urban	2011	221860	228590	235700
Amr	Urban	2011	18423.2	24700.5	37704.4
Emr	Urban	2011	19613.5	25882.4	35502.9
Eur	Urban	2011	3823.11	8173.46	30003.3
Sear	Urban	2011	164829	212124	267199
Wpr	Urban	2011	80123.2	182119	327266
Afr	Urban	2012	230283	237273	244364
Amr	Urban	2012	18697.6	25147.9	37426.2
Emr	Urban	2012	19083.5	25627.8	36071.7
Eur	Urban	2012	3708.64	8671.96	36045.8
Sear	Urban	2012	152884	202447	260548
Wpr	Urban	2012	72512.9	181472	338087
Afr	Urban	2013	238539	245937	253310
Amr	Urban	2013	18856.1	25493.3	37940.8
Emr	Urban	2013	18950.7	25643.5	35779.6
Eur	Urban	2013	3873.72	9401.95	39876.6
Sear	Urban	2013	144554	193541	253581
Wpr	Urban	2013	70965.3	179997	341368
Afr	Urban	2014	245844	254316	262234
Amr	Urban	2014	19313.2	25935.4	38963.1
Emr	Urban	2014	19000.1	25620.3	36739.2
Eur	Urban	2014	3917.17	10423.5	44545.8
Sear	Urban	2014	136971	183954	243362
Wpr	Urban	2014	65609.6	178770	358645
Afr	Urban	2015	253314	262415	270850
Amr	Urban	2015	19241.1	26453.6	40070.5
Emr	Urban	2015	18938.4	26025.8	37961
Eur	Urban	2015	4024.85	11195.5	51368.4
Sear	Urban	2015	126646	175479	239645
Wpr	Urban	2015	66167.7	179149	378023
Afr	Urban	2016	259832	269830	279391
Amr	Urban	2016	19968.9	27118.7	41247.5
Emr	Urban	2016	18691.6	26475.2	39316.3
Eur	Urban	2016	3917.87	12509.9	55069.2
Sear	Urban	2016	117016	168005	243216
Wpr	Urban	2016	57371.4	179981	402412
Afr	Urban	2017	265801	277618	288502
Amr	Urban	2017	19861.2	27679.4	41371.8
Emr	Urban	2017	18619.2	27050.4	41259
Eur	Urban	2017	4265.33	13459.5	64133.5
Sear	Urban	2017	108444	161075	237445
Wpr	Urban	2017	52920.4	177257	433598
Afr	Urban	2018	271457	284385	296942
Amr	Urban	2018	20279.5	28278.1	43510.7
Emr	Urban	2018	18956.7	27740.5	42911.9
Eur	Urban	2018	4280.86	14880.7	73838
Sear	Urban	2018	97261.2	153312	239018
Wpr	Urban	2018	48780.6	176733	455675
Afr	Urban	2019	276012	291887	306397
Amr	Urban	2019	20116.1	29286.6	46512.6
Emr	Urban	2019	18860.4	28750.2	46168.1
Eur	Urban	2019	4453.02	16535.3	80929.6
Sear	Urban	2019	90060.9	147154	241401
Wpr	Urban	2019	44355.9	176722	489698
Afr	Urban	2020	281057	299669	317107
Amr	Urban	2020	20827.9	30358.6	48500
Emr	Urban	2020	18940.8	29656.7	49025.1
Eur	Urban	2020	4629.93	18289.2	86413.5
Sear	Urban	2020	81920.8	141414	244789
Wpr	Urban	2020	40860.2	174905	525243
Afr	Urban	2021	288179	308782	328222
Amr	Urban	2021	21009	31766.4	51700.8
Emr	Urban	2021	18932.8	30855.6	53097
Eur	Urban	2021	4904.89	19905.5	92688.2
Sear	Urban	2021	76785.2	135578	252566
Wpr	Urban	2021	37090.7	174097	570053
Afr	Urban	2022	294263	318720	340405
Amr	Urban	2022	20776.2	33015.5	55297.1
Emr	Urban	2022	19078.6	32098	57325.2
Eur	Urban	2022	5315.38	22550.2	98370.8
Sear	Urban	2022	69953.9	130904	255317
Wpr	Urban	2022	36453.7	173969	610911
Afr	Urban	2023	302962	329666	354280
Amr	Urban	2023	21770.4	34934	59087.7
Emr	Urban	2023	19445.7	33578	62924.8
Eur	Urban	2023	5342.13	25250.3	106101
Sear	Urban	2023	64410.5	126273	261072
Wpr	Urban	2023	34053.5	172159	656479
Afr	Urban	2024	310862	341397	368974
Amr	Urban	2024	21746.5	36451.8	64744.4
Emr	Urban	2024	19361	35234.5	69226.6
Eur	Urban	2024	5542.29	27757.4	108984
Sear	Urban	2024	60337.4	121767	270817
Wpr	Urban	2024	31810.1	171028	673223
Afr	Urban	2025	320573	354437	385312
Amr	Urban	2025	22552.3	38509.9	70932.9
Emr	Urban	2025	19843.6	36847.1	74311.3
Eur	Urban	2025	5964.38	30749	112015
Sear	Urban	2025	56544.3	117181	279141
Wpr	Urban	2025	30235.1	170238	731304
Afr	Urban	2026	330760	368431	402161
Amr	Urban	2026	22569.9	40684	76582.5
Emr	Urban	2026	20303.6	38560.4	79843
Eur	Urban	2026	6281.13	33778.7	115897
Sear	Urban	2026	51489.7	113799	286405
Wpr	Urban	2026	30304.9	174975	757099
Afr	Urban	2027	342231	383440	420285
Amr	Urban	2027	23278.3	42719.5	85324.5
Emr	Urban	2027	21046.4	40370.3	85662
Eur	Urban	2027	6942.85	37124.2	118169
Sear	Urban	2027	49416	111183	299276
Wpr	Urban	2027	27575	170766	790620
Afr	Urban	2028	354151	398900	438670
Amr	Urban	2028	24315.6	45254.6	91366.5
Emr	Urban	2028	21236.5	42644.4	90897.3
Eur	Urban	2028	7127.94	41161.6	120719
Sear	Urban	2028	45768.3	107479	310418
Wpr	Urban	2028	27410	170407	830311
Afr	Urban	2029	365707	415043	457262
Amr	Urban	2029	25051.3	48431.1	99197.4
Emr	Urban	2029	21319.1	45181.4	100321
Eur	Urban	2029	7432.96	45415.4	123380
Sear	Urban	2029	43312.2	105803	316035
Wpr	Urban	2029	25163.8	173950	868033
Afr	Urban	2030	377566	432764	477277
Amr	Urban	2030	25689.2	50721.6	108261
Emr	Urban	2030	22506.1	48341.4	105787
Eur	Urban	2030	8128.71	49014.7	126806
Sear	Urban	2030	40205.6	102425	329230
Wpr	Urban	2030	24478.5	172343	901291
Afr	Rural	1990	324997	340408	349099
Amr	Rural	1990	75310.2	87190.9	97344.9
Emr	Rural	1990	120531	141394	162474
Eur	Rural	1990	32374.8	46206.1	65570.4
Sear	Rural	1990	906263	933532	949639
Wpr	Rural	1990	260116	706705	951841
Afr	Rural	1991	334656	348534	356365
Amr	Rural	1991	74843.8	85993.3	96229.7
Emr	Rural	1991	124274	143457	164287
Eur	Rural	1991	32146.1	45673.5	63894
Sear	Rural	1991	919085	945961	962658
Wpr	Rural	1991	293287	720625	953025
Afr	Rural	1992	343932	356642	364029
Amr	Rural	1992	74477.6	84826.1	94231.4
Emr	Rural	1992	126798	145590	165468
Eur	Rural	1992	31898.2	44754.7	62399.4
Sear	Rural	1992	928970	957211	974437
Wpr	Rural	1992	332374	719169	948941
Afr	Rural	1993	353069	364743	371832
Amr	Rural	1993	73638.7	83233.6	92876.2
Emr	Rural	1993	130168	147405	165832
Eur	Rural	1993	31916	44116.7	60656.2
Sear	Rural	1993	940534	968018	985940
Wpr	Rural	1993	358754	721296	943372
Afr	Rural	1994	362403	372949	379266
Amr	Rural	1994	72368.2	81957.2	91663.8
Emr	Rural	1994	133169	149248	166841
Eur	Rural	1994	31463.2	43240.3	59600.5
Sear	Rural	1994	949201	977952	997315
Wpr	Rural	1994	391468	729714	940939
Afr	Rural	1995	371239	381313	387099
Amr	Rural	1995	71294.8	80502	89787.7
Emr	Rural	1995	135816	151025	167805
Eur	Rural	1995	31168.9	42236.2	58290.4
Sear	Rural	1995	956811	988153	1.00864e+06
Wpr	Rural	1995	418217	734737	929994
Afr	Rural	1996	380404	389738	395548
Amr	Rural	1996	69922.7	78950.7	88299
Emr	Rural	1996	137605	151857	167492
Eur	Rural	1996	30715.4	41349	55806.7
Sear	Rural	1996	964529	997866	1.01957e+06
Wpr	Rural	1996	429030	735781	921031
Afr	Rural	1997	389997	398206	403169
Amr	Rural	1997	68664.2	77510.3	86420.8
Emr	Rural	1997	139270	152552	167014
Eur	Rural	1997	29880.3	40170.2	53934.7
Sear	Rural	1997	970487	1.00551e+06	1.02904e+06
Wpr	Rural	1997	446019	734501	912957
Afr	Rural	1998	399428	406760	411502
Amr	Rural	1998	67128.1	76021.3	85061.4
Emr	Rural	1998	140016	152728	166317
Eur	Rural	1998	29330.9	38812.3	51739.8
Sear	Rural	1998	977996	1.01363e+06	1.03932e+06
Wpr	Rural	1998	469143	737227	898299
Afr	Rural	1999	408139	415349	419860
Amr	Rural	1999	66118	74691.4	83104.9
Emr	Rural	1999	140657	152662	164757
Eur	Rural	1999	28104.6	37420.4	50169.4
Sear	Rural	1999	980907	1.02029e+06	1.04819e+06
Wpr	Rural	1999	480524	736415	893570
Afr	Rural	2000	417088	424010	428447
Amr	Rural	2000	64842.8	73003.5	81381.2
Emr	Rural	2000	141687	152749	163999
Eur	Rural	2000	27508	35837.2	47543
Sear	Rural	2000	985281	1.02677e+06	1.05651e+06
Wpr	Rural	2000	484358	733833	882053
Afr	Rural	2001	426080	432210	436377
Amr	Rural	2001	63355.1	71607	79843.1
Emr	Rural	2001	142164	153126	163506
Eur	Rural	2001	26544	34206.2	45848
Sear	Rural	2001	988955	1.03305e+06	1.0643e+06
Wpr	Rural	2001	502435	727728	872792
Afr	Rural	2002	434407	440524	444733
Amr	Rural	2002	62119	70110.7	78574.6
Emr	Rural	2002	142456	153322	163225
Eur	Rural	2002	25616.3	32597.5	44079.5
Sear	Rural	2002	988910	1.03727e+06	1.07052e+06
Wpr	Rural	2002	482102	717093	855004
Afr	Rural	2003	443055	448924	453191
Amr	Rural	2003	60911.6	68787.8	76737.3
Emr	Rural	2003	143360	154055	163716
Eur	Rural	2003	24508.4	30970.2	41740.3
Sear	Rural	2003	990720	1.04074e+06	1.0775e+06
Wpr	Rural	2003	502178	710769	842175
Afr	Rural	2004	451697	457554	461779
Amr	Rural	2004	60024.7	67635.4	75701.7
Emr	Rural	2004	144347	154772	164117
Eur	Rural	2004	23412.1	29606.8	40720.4
Sear	Rural	2004	993019	1.04377e+06	1.08031e+06
Wpr	Rural	2004	497478	695764	825272
Afr	Rural	2005	460117	466204	470480
Amr	Rural	2005	58613.6	66312	74157.8
Emr	Rural	2005	144715	155578	165137
Eur	Rural	2005	22368.7	28424.6	39013
Sear	Rural	2005	989961	1.04499e+06	1.08314e+06
Wpr	Rural	2005	471065	683596	808001
Afr	Rural	2006	469436	475313	479738
Amr	Rural	2006	57512.8	64985	72519.9
Emr	Rural	2006	145003	156239	165593
Eur	Rural	2006	21576.7	27468.6	38772
Sear	Rural	2006	984390	1.04471e+06	1.08584e+06
Wpr	Rural	2006	476905	669847	796845
Afr	Rural	2007	478672	484488	489038
Amr	Rural	2007	56675.2	63941.8	71506.7
Emr	Rural	2007	145572	157397	166484
Eur	Rural	2007	20651.4	26711	38010.5
Sear	Rural	2007	982142	1.04153e+06	1.08412e+06
Wpr	Rural	2007	462787	657078	783305
Afr	Rural	2008	488347	493776	498182
Amr	Rural	2008	55888	62627.2	69725.2
Emr	Rural	2008	146000	157942	167650
Eur	Rural	2008	20156.6	26338	39226.8
Sear	Rural	2008	978326	1.03772e+06	1.08326e+06
Wpr	Rural	2008	450480	640732	769461
Afr	Rural	2009	497317	503164	507633
Amr	Rural	2009	54845.9	61593.5	68556.7
Emr	Rural	2009	146096	158573	168228
Eur	Rural	2009	19474	25951.7	40005
Sear	Rural	2009	965451	1.0323e+06	1.08108e+06
Wpr	Rural	2009	430551	625081	758540
Afr	Rural	2010	506677	512764	517445
Amr	Rural	2010	53902.2	60402	67654.6
Emr	Rural	2010	146061	159224	169346
Eur	Rural	2010	19157.3	25884.1	40302.4
Sear	Rural	2010	953565	1.02298e+06	1.07518e+06
Wpr	Rural	2010	421432	605802	738318
Afr	Rural	2011	516111	522371	526991
Amr	Rural	2011	53011.6	59172.1	66083.1
Emr	Rural	2011	144657	159600	170964
Eur	Rural	2011	18611.1	25946.3	40885.6
Sear	Rural	2011	937886	1.01347e+06	1.06704e+06
Wpr	Rural	2011	405382	588234	727228
Afr	Rural	2012	525451	532208	537366
Amr	Rural	2012	51740.5	57969.4	64573.9
Emr	Rural	2012	145914	160464	172246
Eur	Rural	2012	18568.6	26087.2	43363.8
Sear	Rural	2012	923033	999402	1.06108e+06
Wpr	Rural	2012	385378	570937	713818
Afr	Rural	2013	535039	542286	547097
Amr	Rural	2013	50607.3	56566.6	63672.3
Emr	Rural	2013	145622	161561	173921
Eur	Rural	2013	18530.1	26408.8	46389.5
Sear	Rural	2013	905481	984368	1.05105e+06
Wpr	Rural	2013	367595	553972	699571
Afr	Rural	2014	545216	552165	557240
Amr	Rural	2014	49228	55268.3	62102.3
Emr	Rural	2014	145225	162096	175446
Eur	Rural	2014	18489.7	27048.1	47188.3
Sear	Rural	2014	882078	964815	1.04144e+06
Wpr	Rural	2014	335681	534948	689830
Afr	Rural	2015	554367	562024	567390
Amr	Rural	2015	47676.8	53744.5	61116.4
Emr	Rural	2015	144455	162159	176961
Eur	Rural	2015	18061.8	27740	49433
Sear	Rural	2015	846737	942941	1.02746e+06
Wpr	Rural	2015	315180	518490	674917
Afr	Rural	2016	563174	572044	577578
Amr	Rural	2016	46120.2	52288.8	59947.6
Emr	Rural	2016	143499	162089	178461
Eur	Rural	2016	17864.6	28204.7	52223.6
Sear	Rural	2016	811407	918137	1.01405e+06
Wpr	Rural	2016	280408	499094	665969
Afr	Rural	2017	573058	581717	587748
Amr	Rural	2017	44630.2	50815	58500.5
Emr	Rural	2017	141601	161708	179542
Eur	Rural	2017	18084.6	28767.5	53952.3
Sear	Rural	2017	766244	894179	1.0056e+06
Wpr	Rural	2017	257267	480284	655580
Afr	Rural	2018	580808	591384	597917
Amr	Rural	2018	43001.3	49548.4	57711.9
Emr	Rural	2018	138980	161243	179881
Eur	Rural	2018	18275.6	29712.6	55926.1
Sear	Rural	2018	719936	865058	994714
Wpr	Rural	2018	225933	464472	648755
Afr	Rural	2019	590509	601143	608266
Amr	Rural	2019	41635	48322.5	56576.5
Emr	Rural	2019	136234	160359	181845
Eur	Rural	2019	17804.3	30549.6	58125
Sear	Rural	2019	660385	838049	986746
Wpr	Rural	2019	198800	447001	632920
Afr	Rural	2020	598058	610364	618255
Amr	Rural	2020	40012.4	46907.1	55916.2
Emr	Rural	2020	132359	158656	183387
Eur	Rural	2020	17733.5	31317.1	60110.6
Sear	Rural	2020	598124	804660	980789
Wpr	Rural	2020	173894	428100	622078
Afr	Rural	2021	605307	619734	628484
Amr	Rural	2021	38086.4	45786.7	55592
Emr	Rural	2021	126529	157672	184051
Eur	Rural	2021	17555.3	32049.7	60817.6
Sear	Rural	2021	549696	775938	966677
Wpr	Rural	2021	160182	416221	609424
Afr	Rural	2022	613843	628837	638402
Amr	Rural	2022	36610.7	44637.1	54940.2
Emr	Rural	2022	121796	155502	185334
Eur	Rural	2022	17885.2	32562.6	62072.3
Sear	Rural	2022	492434	744386	966755
Wpr	Rural	2022	139436	397587	601283
Afr	Rural	2023	620080	637579	648308
Amr	Rural	2023	34930.2	43538.7	54503.6
Emr	Rural	2023	115050	153167	186902
Eur	Rural	2023	17573.8	33386.3	63653.3
Sear	Rural	2023	439395	711377	963485
Wpr	Rural	2023	127440	380080	588568
Afr	Rural	2024	627009	646557	658075
Amr	Rural	2024	33525.5	42436.5	54576.5
Emr	Rural	2024	110005	150821	188225
Eur	Rural	2024	17437.2	34308	65222.4
Sear	Rural	2024	386856	677084	955524
Wpr	Rural	2024	112353	365017	574802
Afr	Rural	2025	632614	655694	668232
Amr	Rural	2025	32488.3	41520.4	53517.4
Emr	Rural	2025	103203	148394	188925
Eur	Rural	2025	17370.5	35143.9	66062.3
Sear	Rural	2025	345388	645264	950798
Wpr	Rural	2025	105254	351645	562525
Afr	Rural	2026	636937	664101	677684
Amr	Rural	2026	30838	40642.5	53814.8
Emr	Rural	2026	97907.7	146091	189745
Eur	Rural	2026	17372.1	35925.1	67205.4
Sear	Rural	2026	309099	609282	943255
Wpr	Rural	2026	95662.4	337098	552381
Afr	Rural	2027	642483	672595	687794
Amr	Rural	2027	30006.3	39897.4	53082.5
Emr	Rural	2027	91481.4	143336	191255
Eur	Rural	2027	17459	36591.1	68041.5
Sear	Rural	2027	272072	579268	933522
Wpr	Rural	2027	87914.7	322899	540289
Afr	Rural	2028	647463	681296	697129
Amr	Rural	2028	28554.2	38966.1	53268.6
Emr	Rural	2028	85440.4	140703	191120
Eur	Rural	2028	17510.4	37265	68911.9
Sear	Rural	2028	243190	545801	937743
Wpr	Rural	2028	84214.7	309221	528736
Afr	Rural	2029	652134	688883	706772
Amr	Rural	2029	27661.3	38388.5	53215.7
Emr	Rural	2029	79743.1	138007	191867
Eur	Rural	2029	17202	37855.1	69257.2
Sear	Rural	2029	213012	511258	919696
Wpr	Rural	2029	79151	297372	517296
Afr	Rural	2030	653186	696959	716322
Amr	Rural	2030	26745	37679.5	53432.4
Emr	Rural	2030	75665.5	134542	192651
Eur	Rural	2030	17359.4	38572.3	69565.7
Sear	Rural	2030	195625	481971	910792
Wpr	Rural	2030	73288.5	283463	507735
Afr	Overall	1990	420485	438832	452120
Amr	Overall	1990	108384	130335	155402
Emr	Overall	1990	146214	178508	211593
Eur	Overall	1990	44284.4	64141.7	93723.1
Sear	Overall	1990	1.06167e+06	1.16424e+06	1.232e+06
Wpr	Overall	1990	400948	822830	1.15984e+06
Afr	Overall	1991	434856	451610	463977
Amr	Overall	1991	106801	127386	152337
Emr	Overall	1991	150942	180513	213076
Eur	Overall	1991	44109	62549.2	89892
Sear	Overall	1991	1.0707e+06	1.17823e+06	1.25041e+06
Wpr	Overall	1991	434753	832414	1.16983e+06
Afr	Overall	1992	449111	464474	476057
Amr	Overall	1992	104409	124790	149355
Emr	Overall	1992	154282	182507	213639
Eur	Overall	1992	43801.2	60652.7	87809.4
Sear	Overall	1992	1.08709e+06	1.19254e+06	1.26939e+06
Wpr	Overall	1992	468927	848985	1.15257e+06
Afr	Overall	1993	462828	477701	488858
Amr	Overall	1993	102371	121657	144800
Emr	Overall	1993	155621	184635	214097
Eur	Overall	1993	42312.6	58732.9	84732
Sear	Overall	1993	1.09378e+06	1.20545e+06	1.28692e+06
Wpr	Overall	1993	497230	852891	1.14532e+06
Afr	Overall	1994	477745	490844	501206
Amr	Overall	1994	100756	119273	142244
Emr	Overall	1994	159257	186591	215275
Eur	Overall	1994	41251.4	57090.5	80404.5
Sear	Overall	1994	1.09712e+06	1.21617e+06	1.29998e+06
Wpr	Overall	1994	537755	862809	1.1443e+06
Afr	Overall	1995	491104	504072	513919
Amr	Overall	1995	98193.6	116712	140115
Emr	Overall	1995	162060	187641	214530
Eur	Overall	1995	40435	54873	78340.9
Sear	Overall	1995	1.10345e+06	1.22884e+06	1.31747e+06
Wpr	Overall	1995	577834	870903	1.14764e+06
Afr	Overall	1996	505519	517632	526986
Amr	Overall	1996	96027.4	113711	137021
Emr	Overall	1996	164610	188720	213725
Eur	Overall	1996	39342.1	53263.9	75608.6
Sear	Overall	1996	1.10425e+06	1.23702e+06	1.33619e+06
Wpr	Overall	1996	595377	872883	1.15654e+06
Afr	Overall	1997	519786	531092	540149
Amr	Overall	1997	93924.1	110688	133097
Emr	Overall	1997	163478	189370	213672
Eur	Overall	1997	38349.1	51298.7	71360
Sear	Overall	1997	1.1086e+06	1.24606e+06	1.3524e+06
Wpr	Overall	1997	615879	876811	1.14585e+06
Afr	Overall	1998	534386	544902	553718
Amr	Overall	1998	90593.1	108325	130707
Emr	Overall	1998	165557	188871	212360
Eur	Overall	1998	37032.6	49192.4	68894.3
Sear	Overall	1998	1.1049e+06	1.24994e+06	1.36442e+06
Wpr	Overall	1998	633345	880294	1.13665e+06
Afr	Overall	1999	548413	558768	567421
Amr	Overall	1999	89050.8	105418	127374
Emr	Overall	1999	164370	188772	211912
Eur	Overall	1999	35558.9	47034.9	65513.4
Sear	Overall	1999	1.10758e+06	1.25781e+06	1.37843e+06
Wpr	Overall	1999	639798	880368	1.12834e+06
Afr	Overall	2000	563343	572820	581037
Amr	Overall	2000	85834.3	102612	124314
Emr	Overall	2000	164783	188941	211421
Eur	Overall	2000	34213.8	44939.6	61666.2
Sear	Overall	2000	1.09809e+06	1.26158e+06	1.38562e+06
Wpr	Overall	2000	645777	877123	1.12248e+06
Afr	Overall	2001	577576	587215	595365
Amr	Overall	2001	83294	100193	122606
Emr	Overall	2001	164689	188178	210427
Eur	Overall	2001	32875.1	42905.2	60428.6
Sear	Overall	2001	1.10125e+06	1.26136e+06	1.40134e+06
Wpr	Overall	2001	636383	870163	1.11153e+06
Afr	Overall	2002	592471	601705	609553
Amr	Overall	2002	82289.9	97981.4	119863
Emr	Overall	2002	164400	188289	210354
Eur	Overall	2002	31117.4	40744.1	58229.4
Sear	Overall	2002	1.08833e+06	1.26391e+06	1.40834e+06
Wpr	Overall	2002	643616	865898	1.10103e+06
Afr	Overall	2003	607455	616383	624658
Amr	Overall	2003	80173.3	96030.9	117791
Emr	Overall	2003	165102	188174	209949
Eur	Overall	2003	29992.4	38896.6	56098.3
Sear	Overall	2003	1.0776e+06	1.2615e+06	1.42477e+06
Wpr	Overall	2003	641845	857211	1.11516e+06
Afr	Overall	2004	622252	631662	639648
Amr	Overall	2004	78570.8	93693.5	115293
Emr	Overall	2004	164129	188446	210452
Eur	Overall	2004	28663.7	37203	56382
Sear	Overall	2004	1.06865e+06	1.26262e+06	1.42652e+06
Wpr	Overall	2004	633540	849532	1.09767e+06
Afr	Overall	2005	637983	647433	655839
Amr	Overall	2005	76870.6	92088.2	112884
Emr	Overall	2005	162650	188497	211415
Eur	Overall	2005	27236.4	35859	54456.9
Sear	Overall	2005	1.05793e+06	1.26189e+06	1.42686e+06
Wpr	Overall	2005	613435	839187	1.08861e+06
Afr	Overall	2006	653965	663355	671953
Amr	Overall	2006	75482	89944.8	111685
Emr	Overall	2006	160675	187862	211658
Eur	Overall	2006	26324.6	34850.2	55935
Sear	Overall	2006	1.03522e+06	1.25094e+06	1.43632e+06
Wpr	Overall	2006	601288	825249	1.06596e+06
Afr	Overall	2007	670279	680163	688470
Amr	Overall	2007	74403.5	88711.3	110645
Emr	Overall	2007	161302	187293	211239
Eur	Overall	2007	25561.5	34201.5	57387.5
Sear	Overall	2007	1.02402e+06	1.24249e+06	1.42871e+06
Wpr	Overall	2007	590896	814458	1.0617e+06
Afr	Overall	2008	687765	697401	705916
Amr	Overall	2008	72828.7	87495.3	108019
Emr	Overall	2008	159447	187600	212001
Eur	Overall	2008	24985.7	33593.1	58959.9
Sear	Overall	2008	1.00934e+06	1.23216e+06	1.42529e+06
Wpr	Overall	2008	554300	796293	1.04148e+06
Afr	Overall	2009	704649	715103	724224
Amr	Overall	2009	72019.8	86259.7	106759
Emr	Overall	2009	158969	186847	212009
Eur	Overall	2009	24205.4	33853.5	61677.5
Sear	Overall	2009	984932	1.21379e+06	1.41271e+06
Wpr	Overall	2009	552893	785434	1.03368e+06
Afr	Overall	2010	722460	732945	742592
Amr	Overall	2010	70807.4	85325.1	104438
Emr	Overall	2010	158386	187130	212611
Eur	Overall	2010	23972.7	34317.4	64032.1
Sear	Overall	2010	964268	1.19766e+06	1.40418e+06
Wpr	Overall	2010	533817	769136	1.01659e+06
Afr	Overall	2011	739838	751596	761477
Amr	Overall	2011	70291	84174	104148
Emr	Overall	2011	158341	187817	215392
Eur	Overall	2011	23531.1	34673.2	66773.3
Sear	Overall	2011	940127	1.18317e+06	1.40121e+06
Wpr	Overall	2011	515530	754932	1.01218e+06
Afr	Overall	2012	758406	770197	780952
Amr	Overall	2012	69361.3	82833.2	103352
Emr	Overall	2012	159078	188287	217557
Eur	Overall	2012	23835	35875.6	71216.7
Sear	Overall	2012	910157	1.16076e+06	1.38128e+06
Wpr	Overall	2012	495348	734456	1.0068e+06
Afr	Overall	2013	776664	789008	799643
Amr	Overall	2013	67934	81923.7	101844
Emr	Overall	2013	157056	188751	217733
Eur	Overall	2013	23889.2	37172.3	79078.6
Sear	Overall	2013	880766	1.1327e+06	1.36953e+06
Wpr	Overall	2013	467679	716013	1.00365e+06
Afr	Overall	2014	793993	807820	819350
Amr	Overall	2014	67348.7	80605.8	100362
Emr	Overall	2014	157663	190172	219730
Eur	Overall	2014	24191.2	38911.5	84393.1
Sear	Overall	2014	849551	1.10847e+06	1.35375e+06
Wpr	Overall	2014	448892	698692	984291
Afr	Overall	2015	811665	826141	838483
Amr	Overall	2015	65872.5	79727.4	100998
Emr	Overall	2015	156027	190257	222561
Eur	Overall	2015	24230	40373.9	89056.2
Sear	Overall	2015	822236	1.08529e+06	1.33721e+06
Wpr	Overall	2015	423434	688335	990921
Afr	Overall	2016	827731	844319	857958
Amr	Overall	2016	64995.9	78969.6	98409.9
Emr	Overall	2016	157050	190430	222829
Eur	Overall	2016	24490.4	42363.8	98993.5
Sear	Overall	2016	773740	1.04914e+06	1.32746e+06
Wpr	Overall	2016	402927	666706	983583
Afr	Overall	2017	843930	861884	877465
Amr	Overall	2017	63907.3	78093.4	98700.9
Emr	Overall	2017	154790	191178	226297
Eur	Overall	2017	24762.8	44861.9	106240
Sear	Overall	2017	733435	1.01939e+06	1.30164e+06
Wpr	Overall	2017	361597	652220	987738
Afr	Overall	2018	859429	879143	896749
Amr	Overall	2018	63141.3	77453.7	98861
Emr	Overall	2018	151654	191320	226749
Eur	Overall	2018	25413.6	46746.7	114123
Sear	Overall	2018	691102	988852	1.27576e+06
Wpr	Overall	2018	331869	632464	998998
Afr	Overall	2019	874302	896639	916421
Amr	Overall	2019	62010	77191.6	98729.9
Emr	Overall	2019	149966	190467	229996
Eur	Overall	2019	25452.7	49560.6	118537
Sear	Overall	2019	652962	958985	1.25508e+06
Wpr	Overall	2019	314853	616422	998872
Afr	Overall	2020	888544	914873	936629
Amr	Overall	2020	61323.5	77097.5	99944.3
Emr	Overall	2020	147529	190840	233975
Eur	Overall	2020	26597.9	52278.2	129957
Sear	Overall	2020	613082	921583	1.24174e+06
Wpr	Overall	2020	277828	609287	1.02165e+06
Afr	Overall	2021	905223	933325	958388
Amr	Overall	2021	60450.3	77344	102488
Emr	Overall	2021	143647	190698	236336
Eur	Overall	2021	26596.2	56590.5	135622
Sear	Overall	2021	562972	883520	1.23257e+06
Wpr	Overall	2021	254413	586758	1.03404e+06
Afr	Overall	2022	920555	952337	980512
Amr	Overall	2022	59648.3	77530.7	104228
Emr	Overall	2022	140358	189601	238466
Eur	Overall	2022	27468.4	59532.4	141718
Sear	Overall	2022	521050	848585	1.21285e+06
Wpr	Overall	2022	239972	577463	1.06204e+06
Afr	Overall	2023	937004	973053	1.00326e+06
Amr	Overall	2023	59488.6	77944.9	108829
Emr	Overall	2023	135407	189205	241668
Eur	Overall	2023	27836.2	63191.5	150072
Sear	Overall	2023	455734	815992	1.20582e+06
Wpr	Overall	2023	219702	559153	1.08195e+06
Afr	Overall	2024	952795	993729	1.02791e+06
Amr	Overall	2024	59191.3	78933.4	111659
Emr	Overall	2024	133561	188885	245837
Eur	Overall	2024	28199	67111.5	156182
Sear	Overall	2024	429331	778263	1.2059e+06
Wpr	Overall	2024	204879	555239	1.10407e+06
Afr	Overall	2025	970445	1.01549e+06	1.05295e+06
Amr	Overall	2025	58667.5	80128.3	115401
Emr	Overall	2025	127792	188030	251062
Eur	Overall	2025	29643.7	71194.7	162092
Sear	Overall	2025	401447	747399	1.19767e+06
Wpr	Overall	2025	187256	545165	1.11811e+06
Afr	Overall	2026	989809	1.03756e+06	1.07815e+06
Amr	Overall	2026	58412.3	80902.8	121358
Emr	Overall	2026	125464	186835	254080
Eur	Overall	2026	29620.1	75142.6	167480
Sear	Overall	2026	350368	709897	1.16454e+06
Wpr	Overall	2026	180403	530355	1.15432e+06
Afr	Overall	2027	1.00735e+06	1.06097e+06	1.10323e+06
Amr	Overall	2027	58563.4	82888.9	128980
Emr	Overall	2027	120055	186705	256748
Eur	Overall	2027	30317.5	78735.6	172570
Sear	Overall	2027	321666	681988	1.1794e+06
Wpr	Overall	2027	161285	515647	1.16394e+06
Afr	Overall	2028	1.02456e+06	1.08377e+06	1.1314e+06
Amr	Overall	2028	58744.4	84567.5	135792
Emr	Overall	2028	117220	186122	260492
Eur	Overall	2028	32112.5	82910.2	177135
Sear	Overall	2028	294594	652525	1.15647e+06
Wpr	Overall	2028	155014	509574	1.18665e+06
Afr	Overall	2029	1.04389e+06	1.10755e+06	1.1596e+06
Amr	Overall	2029	58020.5	86632.1	142044
Emr	Overall	2029	111970	185783	264910
Eur	Overall	2029	32142.6	89554.6	177332
Sear	Overall	2029	268602	619975	1.16027e+06
Wpr	Overall	2029	148167	507044	1.22368e+06
Afr	Overall	2030	1.06209e+06	1.13199e+06	1.18539e+06
Amr	Overall	2030	58382.1	89569	146550
Emr	Overall	2030	109625	185047	273386
Eur	Overall	2030	33838.6	92681	182051
Sear	Overall	2030	245608	589963	1.15398e+06
Wpr	Overall	2030	136198	492502	1.24253e+06

## Sheet: Fuels (%)
region	area	fuel	year	percent_lower95	percent_median	percent_upper95
Afr	Urban	Biomass	1990	0.25179	0.337567	0.442004
Amr	Urban	Biomass	1990	0.0353432	0.0687586	0.121791
Emr	Urban	Biomass	1990	0.0864882	0.155596	0.24831
Eur	Urban	Biomass	1990	0.0140138	0.0320554	0.0880432
Sear	Urban	Biomass	1990	0.25256	0.346393	0.446173
Wpr	Urban	Biomass	1990	0.0540063	0.106774	0.342623
Afr	Urban	Biomass	1991	0.256942	0.338395	0.441045
Amr	Urban	Biomass	1991	0.0342152	0.0637896	0.115597
Emr	Urban	Biomass	1991	0.0889949	0.156837	0.239347
Eur	Urban	Biomass	1991	0.0132963	0.0306459	0.08042
Sear	Urban	Biomass	1991	0.255255	0.33753	0.432548
Wpr	Urban	Biomass	1991	0.0516135	0.103325	0.313603
Afr	Urban	Biomass	1992	0.259793	0.338785	0.435114
Amr	Urban	Biomass	1992	0.0331662	0.0603869	0.10582
Emr	Urban	Biomass	1992	0.0966908	0.155039	0.233158
Eur	Urban	Biomass	1992	0.0133772	0.0286759	0.0810636
Sear	Urban	Biomass	1992	0.244181	0.324993	0.413085
Wpr	Urban	Biomass	1992	0.0511464	0.101732	0.297699
Afr	Urban	Biomass	1993	0.262258	0.337339	0.421918
Amr	Urban	Biomass	1993	0.032853	0.0557852	0.100478
Emr	Urban	Biomass	1993	0.0990079	0.154719	0.22895
Eur	Urban	Biomass	1993	0.0130505	0.0273597	0.069821
Sear	Urban	Biomass	1993	0.234252	0.313144	0.397866
Wpr	Urban	Biomass	1993	0.0491476	0.101607	0.286593
Afr	Urban	Biomass	1994	0.264477	0.336686	0.416172
Amr	Urban	Biomass	1994	0.0313906	0.0533659	0.0930711
Emr	Urban	Biomass	1994	0.105215	0.15194	0.215904
Eur	Urban	Biomass	1994	0.012301	0.0257986	0.0672782
Sear	Urban	Biomass	1994	0.226173	0.303945	0.389637
Wpr	Urban	Biomass	1994	0.0489387	0.101024	0.266744
Afr	Urban	Biomass	1995	0.263985	0.334326	0.412312
Amr	Urban	Biomass	1995	0.0296281	0.0510015	0.0908524
Emr	Urban	Biomass	1995	0.10239	0.151148	0.207151
Eur	Urban	Biomass	1995	0.0122013	0.0238145	0.0604198
Sear	Urban	Biomass	1995	0.222883	0.293834	0.382579
Wpr	Urban	Biomass	1995	0.0470338	0.100051	0.231686
Afr	Urban	Biomass	1996	0.267474	0.331349	0.400488
Amr	Urban	Biomass	1996	0.0293645	0.0480646	0.0854873
Emr	Urban	Biomass	1996	0.107245	0.148738	0.195838
Eur	Urban	Biomass	1996	0.0115076	0.022982	0.0572447
Sear	Urban	Biomass	1996	0.210837	0.288649	0.372688
Wpr	Urban	Biomass	1996	0.0460499	0.100029	0.234342
Afr	Urban	Biomass	1997	0.272372	0.328655	0.394453
Amr	Urban	Biomass	1997	0.0298984	0.0464567	0.0794392
Emr	Urban	Biomass	1997	0.101278	0.144451	0.190517
Eur	Urban	Biomass	1997	0.0116403	0.0216369	0.0512522
Sear	Urban	Biomass	1997	0.210703	0.279838	0.361587
Wpr	Urban	Biomass	1997	0.0464093	0.0997545	0.215862
Afr	Urban	Biomass	1998	0.270225	0.325893	0.387311
Amr	Urban	Biomass	1998	0.0287346	0.0463893	0.0830227
Emr	Urban	Biomass	1998	0.102478	0.142783	0.189008
Eur	Urban	Biomass	1998	0.0116452	0.020699	0.0458034
Sear	Urban	Biomass	1998	0.208509	0.275047	0.363165
Wpr	Urban	Biomass	1998	0.0475471	0.10174	0.216398
Afr	Urban	Biomass	1999	0.275617	0.323071	0.378944
Amr	Urban	Biomass	1999	0.0284112	0.0440092	0.0772703
Emr	Urban	Biomass	1999	0.103398	0.138675	0.181843
Eur	Urban	Biomass	1999	0.01057	0.0192533	0.0488463
Sear	Urban	Biomass	1999	0.203456	0.270784	0.351119
Wpr	Urban	Biomass	1999	0.0456118	0.0997334	0.197797
Afr	Urban	Biomass	2000	0.274192	0.320377	0.370941
Amr	Urban	Biomass	2000	0.0283878	0.0438938	0.0792824
Emr	Urban	Biomass	2000	0.0980413	0.135194	0.174689
Eur	Urban	Biomass	2000	0.0107584	0.0186204	0.0441494
Sear	Urban	Biomass	2000	0.202708	0.268029	0.353162
Wpr	Urban	Biomass	2000	0.0460798	0.103408	0.202566
Afr	Urban	Biomass	2001	0.279058	0.317893	0.36731
Amr	Urban	Biomass	2001	0.0277135	0.0417231	0.0764043
Emr	Urban	Biomass	2001	0.0965479	0.130243	0.169546
Eur	Urban	Biomass	2001	0.010475	0.0182504	0.0432023
Sear	Urban	Biomass	2001	0.204054	0.26637	0.346501
Wpr	Urban	Biomass	2001	0.0498346	0.105381	0.203991
Afr	Urban	Biomass	2002	0.275007	0.313606	0.35633
Amr	Urban	Biomass	2002	0.0263914	0.0403092	0.0752327
Emr	Urban	Biomass	2002	0.0915827	0.125276	0.162216
Eur	Urban	Biomass	2002	0.0102282	0.0181137	0.0463602
Sear	Urban	Biomass	2002	0.194205	0.266142	0.346372
Wpr	Urban	Biomass	2002	0.0477664	0.105762	0.194254
Afr	Urban	Biomass	2003	0.276746	0.310838	0.348319
Amr	Urban	Biomass	2003	0.026638	0.0411189	0.0698915
Emr	Urban	Biomass	2003	0.0853165	0.119157	0.156008
Eur	Urban	Biomass	2003	0.0103509	0.0175404	0.0517921
Sear	Urban	Biomass	2003	0.19801	0.263786	0.34154
Wpr	Urban	Biomass	2003	0.0475777	0.109187	0.195485
Afr	Urban	Biomass	2004	0.27272	0.306503	0.345186
Amr	Urban	Biomass	2004	0.0261076	0.0396552	0.0651837
Emr	Urban	Biomass	2004	0.0812647	0.113164	0.154744
Eur	Urban	Biomass	2004	0.00978928	0.0174818	0.0540302
Sear	Urban	Biomass	2004	0.189978	0.258373	0.329915
Wpr	Urban	Biomass	2004	0.0512381	0.110553	0.190805
Afr	Urban	Biomass	2005	0.268905	0.301948	0.33609
Amr	Urban	Biomass	2005	0.0270048	0.0392406	0.0653432
Emr	Urban	Biomass	2005	0.0747902	0.105233	0.142356
Eur	Urban	Biomass	2005	0.00998739	0.0171246	0.0494559
Sear	Urban	Biomass	2005	0.192509	0.25759	0.337437
Wpr	Urban	Biomass	2005	0.0525862	0.113505	0.210811
Afr	Urban	Biomass	2006	0.263603	0.299513	0.336135
Amr	Urban	Biomass	2006	0.0262324	0.0390216	0.0655673
Emr	Urban	Biomass	2006	0.0656338	0.0968802	0.132115
Eur	Urban	Biomass	2006	0.0103058	0.0179327	0.0590233
Sear	Urban	Biomass	2006	0.190075	0.25461	0.32956
Wpr	Urban	Biomass	2006	0.0532609	0.116315	0.208737
Afr	Urban	Biomass	2007	0.260598	0.29361	0.325683
Amr	Urban	Biomass	2007	0.0266256	0.0390766	0.0626744
Emr	Urban	Biomass	2007	0.0608568	0.0880217	0.123245
Eur	Urban	Biomass	2007	0.0104461	0.017658	0.0617908
Sear	Urban	Biomass	2007	0.181581	0.249693	0.324857
Wpr	Urban	Biomass	2007	0.0543345	0.116765	0.21293
Afr	Urban	Biomass	2008	0.2578	0.288505	0.321959
Amr	Urban	Biomass	2008	0.0258668	0.037631	0.0605698
Emr	Urban	Biomass	2008	0.0527431	0.0810646	0.113085
Eur	Urban	Biomass	2008	0.0103187	0.0193511	0.0682518
Sear	Urban	Biomass	2008	0.179315	0.244373	0.318835
Wpr	Urban	Biomass	2008	0.0525309	0.121248	0.225629
Afr	Urban	Biomass	2009	0.255089	0.284	0.316705
Amr	Urban	Biomass	2009	0.0262486	0.0377536	0.0594958
Emr	Urban	Biomass	2009	0.0470733	0.0728573	0.10483
Eur	Urban	Biomass	2009	0.0105429	0.0197485	0.0834862
Sear	Urban	Biomass	2009	0.177889	0.238337	0.31478
Wpr	Urban	Biomass	2009	0.0547042	0.119826	0.236802
Afr	Urban	Biomass	2010	0.248689	0.281704	0.312705
Amr	Urban	Biomass	2010	0.0258448	0.0374502	0.059272
Emr	Urban	Biomass	2010	0.0404142	0.0657057	0.100049
Eur	Urban	Biomass	2010	0.0105142	0.0210875	0.090948
Sear	Urban	Biomass	2010	0.168386	0.230191	0.304854
Wpr	Urban	Biomass	2010	0.0513658	0.12187	0.231004
Afr	Urban	Biomass	2011	0.24662	0.27731	0.309347
Amr	Urban	Biomass	2011	0.0257397	0.0373122	0.0606966
Emr	Urban	Biomass	2011	0.0362322	0.0603011	0.0907366
Eur	Urban	Biomass	2011	0.0107135	0.0226786	0.0933772
Sear	Urban	Biomass	2011	0.159223	0.222131	0.297646
Wpr	Urban	Biomass	2011	0.0502817	0.123447	0.237599
Afr	Urban	Biomass	2012	0.243456	0.275765	0.307513
Amr	Urban	Biomass	2012	0.0251031	0.03762	0.0574626
Emr	Urban	Biomass	2012	0.0326164	0.0562231	0.090347
Eur	Urban	Biomass	2012	0.0104627	0.0241328	0.113427
Sear	Urban	Biomass	2012	0.150168	0.211626	0.292017
Wpr	Urban	Biomass	2012	0.0476852	0.122914	0.247386
Afr	Urban	Biomass	2013	0.241493	0.273643	0.306014
Amr	Urban	Biomass	2013	0.0248783	0.0374767	0.059257
Emr	Urban	Biomass	2013	0.0298203	0.0527954	0.083597
Eur	Urban	Biomass	2013	0.0109224	0.0260957	0.125311
Sear	Urban	Biomass	2013	0.140126	0.201764	0.273937
Wpr	Urban	Biomass	2013	0.0474601	0.123166	0.253978
Afr	Urban	Biomass	2014	0.236937	0.27229	0.306005
Amr	Urban	Biomass	2014	0.0249122	0.0377526	0.0601127
Emr	Urban	Biomass	2014	0.0287105	0.0507095	0.0826025
Eur	Urban	Biomass	2014	0.0104304	0.0274989	0.120907
Sear	Urban	Biomass	2014	0.128562	0.187627	0.265071
Wpr	Urban	Biomass	2014	0.0413893	0.123908	0.270969
Afr	Urban	Biomass	2015	0.238421	0.271449	0.304666
Amr	Urban	Biomass	2015	0.0252328	0.0374016	0.0580198
Emr	Urban	Biomass	2015	0.0263529	0.0494459	0.0844136
Eur	Urban	Biomass	2015	0.00988089	0.0295831	0.155255
Sear	Urban	Biomass	2015	0.119946	0.176592	0.26441
Wpr	Urban	Biomass	2015	0.0382416	0.121978	0.272681
Afr	Urban	Biomass	2016	0.234187	0.271269	0.308521
Amr	Urban	Biomass	2016	0.0253306	0.0381195	0.0583911
Emr	Urban	Biomass	2016	0.0242222	0.0479567	0.0813115
Eur	Urban	Biomass	2016	0.0106094	0.0324008	0.160787
Sear	Urban	Biomass	2016	0.102975	0.168216	0.258584
Wpr	Urban	Biomass	2016	0.0376097	0.121012	0.316887
Afr	Urban	Biomass	2017	0.2355	0.270889	0.312106
Amr	Urban	Biomass	2017	0.0237332	0.0380186	0.0589358
Emr	Urban	Biomass	2017	0.0223784	0.046425	0.0836973
Eur	Urban	Biomass	2017	0.0103944	0.0352276	0.188829
Sear	Urban	Biomass	2017	0.0959934	0.153873	0.254404
Wpr	Urban	Biomass	2017	0.0345139	0.121031	0.325563
Afr	Urban	Biomass	2018	0.231258	0.271213	0.310123
Amr	Urban	Biomass	2018	0.0248193	0.0387229	0.0608625
Emr	Urban	Biomass	2018	0.0208344	0.0455348	0.0801154
Eur	Urban	Biomass	2018	0.0103211	0.0359947	0.231772
Sear	Urban	Biomass	2018	0.0835878	0.145297	0.249212
Wpr	Urban	Biomass	2018	0.0307777	0.120893	0.366245
Afr	Urban	Biomass	2019	0.229425	0.270938	0.313728
Amr	Urban	Biomass	2019	0.0224921	0.0391797	0.0661489
Emr	Urban	Biomass	2019	0.0192545	0.0464212	0.0890139
Eur	Urban	Biomass	2019	0.0106481	0.0398568	0.241347
Sear	Urban	Biomass	2019	0.071377	0.137176	0.255399
Wpr	Urban	Biomass	2019	0.0263488	0.122183	0.345507
Afr	Urban	Biomass	2020	0.22422	0.269704	0.318933
Amr	Urban	Biomass	2020	0.0228697	0.0405865	0.0704321
Emr	Urban	Biomass	2020	0.0190478	0.0453673	0.0933787
Eur	Urban	Biomass	2020	0.0114894	0.0432128	0.264328
Sear	Urban	Biomass	2020	0.066505	0.125767	0.24922
Wpr	Urban	Biomass	2020	0.0236199	0.117756	0.405217
Afr	Urban	Biomass	2021	0.221448	0.26934	0.319501
Amr	Urban	Biomass	2021	0.0236347	0.0413135	0.073381
Emr	Urban	Biomass	2021	0.0158251	0.0452937	0.099553
Eur	Urban	Biomass	2021	0.0111086	0.0456924	0.28137
Sear	Urban	Biomass	2021	0.0598173	0.120542	0.250887
Wpr	Urban	Biomass	2021	0.02143	0.116096	0.417101
Afr	Urban	Biomass	2022	0.218724	0.268027	0.326575
Amr	Urban	Biomass	2022	0.0220839	0.0416672	0.0742229
Emr	Urban	Biomass	2022	0.0168796	0.0454479	0.0973914
Eur	Urban	Biomass	2022	0.0119255	0.0492695	0.302482
Sear	Urban	Biomass	2022	0.0479652	0.112771	0.252749
Wpr	Urban	Biomass	2022	0.0203306	0.109088	0.452245
Afr	Urban	Biomass	2023	0.213096	0.269097	0.324048
Amr	Urban	Biomass	2023	0.0220901	0.0438175	0.0806643
Emr	Urban	Biomass	2023	0.0157276	0.0456901	0.113502
Eur	Urban	Biomass	2023	0.0117971	0.0525522	0.319009
Sear	Urban	Biomass	2023	0.0434276	0.104049	0.247511
Wpr	Urban	Biomass	2023	0.0186149	0.107897	0.478204
Afr	Urban	Biomass	2024	0.207761	0.266396	0.328358
Amr	Urban	Biomass	2024	0.020333	0.0449869	0.0878971
Emr	Urban	Biomass	2024	0.0147356	0.0462961	0.116968
Eur	Urban	Biomass	2024	0.0105604	0.0559899	0.34185
Sear	Urban	Biomass	2024	0.0391068	0.0958895	0.24274
Wpr	Urban	Biomass	2024	0.0177735	0.104573	0.496945
Afr	Urban	Biomass	2025	0.201345	0.265016	0.329552
Amr	Urban	Biomass	2025	0.0209205	0.0465348	0.0954095
Emr	Urban	Biomass	2025	0.0134213	0.0462613	0.12457
Eur	Urban	Biomass	2025	0.0119244	0.0598816	0.343298
Sear	Urban	Biomass	2025	0.035068	0.0905341	0.255401
Wpr	Urban	Biomass	2025	0.0167584	0.102698	0.515862
Afr	Urban	Biomass	2026	0.196609	0.26299	0.338918
Amr	Urban	Biomass	2026	0.0207229	0.0487942	0.102468
Emr	Urban	Biomass	2026	0.0128918	0.0468171	0.130578
Eur	Urban	Biomass	2026	0.0118451	0.0647507	0.359481
Sear	Urban	Biomass	2026	0.0302669	0.0856607	0.250745
Wpr	Urban	Biomass	2026	0.0152941	0.101645	0.570629
Afr	Urban	Biomass	2027	0.193688	0.262459	0.334645
Amr	Urban	Biomass	2027	0.0208454	0.049377	0.112189
Emr	Urban	Biomass	2027	0.0118931	0.0478413	0.143207
Eur	Urban	Biomass	2027	0.0119275	0.0688575	0.377314
Sear	Urban	Biomass	2027	0.0281938	0.0827907	0.265682
Wpr	Urban	Biomass	2027	0.0129876	0.0994887	0.560792
Afr	Urban	Biomass	2028	0.185735	0.260346	0.34011
Amr	Urban	Biomass	2028	0.019777	0.0512605	0.121151
Emr	Urban	Biomass	2028	0.0123611	0.0482258	0.147427
Eur	Urban	Biomass	2028	0.0115302	0.071745	0.381847
Sear	Urban	Biomass	2028	0.0251287	0.0747791	0.266
Wpr	Urban	Biomass	2028	0.0130163	0.0974787	0.584961
Afr	Urban	Biomass	2029	0.179383	0.257228	0.337197
Amr	Urban	Biomass	2029	0.0210703	0.054495	0.130982
Emr	Urban	Biomass	2029	0.00966321	0.0485175	0.180736
Eur	Urban	Biomass	2029	0.0122301	0.0755789	0.382487
Sear	Urban	Biomass	2029	0.0233136	0.0736885	0.262164
Wpr	Urban	Biomass	2029	0.0126826	0.0953293	0.627054
Afr	Urban	Biomass	2030	0.174653	0.256041	0.348169
Amr	Urban	Biomass	2030	0.0206078	0.0552856	0.140214
Emr	Urban	Biomass	2030	0.00867743	0.0494824	0.182207
Eur	Urban	Biomass	2030	0.0122504	0.0767922	0.387163
Sear	Urban	Biomass	2030	0.0179123	0.0690922	0.271967
Wpr	Urban	Biomass	2030	0.0117293	0.0938611	0.650358
Afr	Urban	Charcoal	1990	0.116914	0.15435	0.205757
Amr	Urban	Charcoal	1990	0.00322496	0.00707316	0.0188517
Emr	Urban	Charcoal	1990	0.00414301	0.0144961	0.0301947
Eur	Urban	Charcoal	1990	0.000380549	0.00236618	0.0173691
Sear	Urban	Charcoal	1990	0.00689406	0.0219254	0.0549351
Wpr	Urban	Charcoal	1990	0.00574205	0.0157264	0.0274617
Afr	Urban	Charcoal	1991	0.116301	0.156494	0.205775
Amr	Urban	Charcoal	1991	0.003553	0.00715397	0.0158782
Emr	Urban	Charcoal	1991	0.00483305	0.0142499	0.0279149
Eur	Urban	Charcoal	1991	0.000406491	0.00210749	0.0128181
Sear	Urban	Charcoal	1991	0.00757661	0.0217997	0.0533967
Wpr	Urban	Charcoal	1991	0.00624694	0.0157691	0.0259976
Afr	Urban	Charcoal	1992	0.120082	0.157913	0.204104
Amr	Urban	Charcoal	1992	0.00364753	0.00726847	0.0148063
Emr	Urban	Charcoal	1992	0.00522496	0.014106	0.028709
Eur	Urban	Charcoal	1992	0.000319429	0.00183009	0.0108106
Sear	Urban	Charcoal	1992	0.00801895	0.0216219	0.050718
Wpr	Urban	Charcoal	1992	0.00558936	0.0155103	0.0269958
Afr	Urban	Charcoal	1993	0.124585	0.159307	0.204482
Amr	Urban	Charcoal	1993	0.00391157	0.00725649	0.0140324
Emr	Urban	Charcoal	1993	0.00537907	0.0139934	0.0274968
Eur	Urban	Charcoal	1993	0.000317715	0.00162836	0.0120369
Sear	Urban	Charcoal	1993	0.00736979	0.0209289	0.0433256
Wpr	Urban	Charcoal	1993	0.00540785	0.0151461	0.0251307
Afr	Urban	Charcoal	1994	0.126699	0.162079	0.203936
Amr	Urban	Charcoal	1994	0.00411213	0.00733869	0.0140515
Emr	Urban	Charcoal	1994	0.00631492	0.0137979	0.0290616
Eur	Urban	Charcoal	1994	0.000300985	0.00146716	0.0108972
Sear	Urban	Charcoal	1994	0.00808284	0.0209212	0.0393614
Wpr	Urban	Charcoal	1994	0.00505608	0.0147148	0.0238645
Afr	Urban	Charcoal	1995	0.130186	0.165933	0.207198
Amr	Urban	Charcoal	1995	0.00443433	0.00747666	0.014413
Emr	Urban	Charcoal	1995	0.00689404	0.0140355	0.029126
Eur	Urban	Charcoal	1995	0.000266728	0.00125657	0.00867115
Sear	Urban	Charcoal	1995	0.00870993	0.0205584	0.037867
Wpr	Urban	Charcoal	1995	0.00467917	0.014068	0.0238314
Afr	Urban	Charcoal	1996	0.136067	0.16937	0.207716
Amr	Urban	Charcoal	1996	0.00467427	0.00775573	0.0134128
Emr	Urban	Charcoal	1996	0.0069895	0.0137632	0.0264557
Eur	Urban	Charcoal	1996	0.00023253	0.00112391	0.00692302
Sear	Urban	Charcoal	1996	0.0089591	0.0202848	0.0349589
Wpr	Urban	Charcoal	1996	0.00454579	0.0134496	0.0240696
Afr	Urban	Charcoal	1997	0.141927	0.173485	0.209714
Amr	Urban	Charcoal	1997	0.00519023	0.00790892	0.0142308
Emr	Urban	Charcoal	1997	0.00766909	0.0142193	0.0279832
Eur	Urban	Charcoal	1997	0.00022152	0.000990507	0.00638152
Sear	Urban	Charcoal	1997	0.00862818	0.0201618	0.0360514
Wpr	Urban	Charcoal	1997	0.00432682	0.0125679	0.0213753
Afr	Urban	Charcoal	1998	0.148833	0.178057	0.21163
Amr	Urban	Charcoal	1998	0.00523939	0.00810284	0.0131352
Emr	Urban	Charcoal	1998	0.00883619	0.0144747	0.0279397
Eur	Urban	Charcoal	1998	0.00018996	0.000879145	0.00599457
Sear	Urban	Charcoal	1998	0.0103376	0.0199231	0.0321417
Wpr	Urban	Charcoal	1998	0.00450214	0.0115884	0.0207033
Afr	Urban	Charcoal	1999	0.155067	0.183106	0.21597
Amr	Urban	Charcoal	1999	0.00547245	0.00835883	0.0143474
Emr	Urban	Charcoal	1999	0.00895296	0.014512	0.0287221
Eur	Urban	Charcoal	1999	0.0001892	0.000773663	0.00567341
Sear	Urban	Charcoal	1999	0.0102195	0.0198839	0.0325846
Wpr	Urban	Charcoal	1999	0.00431906	0.0108281	0.0194631
Afr	Urban	Charcoal	2000	0.161215	0.188564	0.219356
Amr	Urban	Charcoal	2000	0.00608776	0.00871122	0.0151892
Emr	Urban	Charcoal	2000	0.00995353	0.0149835	0.0253344
Eur	Urban	Charcoal	2000	0.00017173	0.0006814	0.00506315
Sear	Urban	Charcoal	2000	0.0116677	0.0197847	0.0348584
Wpr	Urban	Charcoal	2000	0.00420306	0.0101243	0.0182924
Afr	Urban	Charcoal	2001	0.169227	0.19423	0.221552
Amr	Urban	Charcoal	2001	0.00630913	0.00928998	0.0161302
Emr	Urban	Charcoal	2001	0.0104621	0.0153479	0.0299389
Eur	Urban	Charcoal	2001	0.000142076	0.000595789	0.0042088
Sear	Urban	Charcoal	2001	0.0120655	0.0195206	0.0295067
Wpr	Urban	Charcoal	2001	0.00422415	0.00951378	0.0180546
Afr	Urban	Charcoal	2002	0.17414	0.199945	0.226429
Amr	Urban	Charcoal	2002	0.00663576	0.0099179	0.0165547
Emr	Urban	Charcoal	2002	0.0112633	0.0156308	0.0290131
Eur	Urban	Charcoal	2002	0.000144616	0.000519821	0.00373571
Sear	Urban	Charcoal	2002	0.0123035	0.0193679	0.0310437
Wpr	Urban	Charcoal	2002	0.0041382	0.00904901	0.0173767
Afr	Urban	Charcoal	2003	0.179988	0.205043	0.231699
Amr	Urban	Charcoal	2003	0.00746389	0.0107365	0.0191292
Emr	Urban	Charcoal	2003	0.0120388	0.0168145	0.0332049
Eur	Urban	Charcoal	2003	0.000123927	0.000473051	0.00369067
Sear	Urban	Charcoal	2003	0.0120243	0.0189808	0.029138
Wpr	Urban	Charcoal	2003	0.00416107	0.00893297	0.0164511
Afr	Urban	Charcoal	2004	0.186525	0.209981	0.23537
Amr	Urban	Charcoal	2004	0.00788544	0.010968	0.0184532
Emr	Urban	Charcoal	2004	0.0130659	0.0175918	0.0350418
Eur	Urban	Charcoal	2004	0.000117649	0.000419831	0.00257203
Sear	Urban	Charcoal	2004	0.0120357	0.019201	0.0295902
Wpr	Urban	Charcoal	2004	0.0043022	0.00874775	0.0164481
Afr	Urban	Charcoal	2005	0.192737	0.216015	0.239537
Amr	Urban	Charcoal	2005	0.00820911	0.0115111	0.0201386
Emr	Urban	Charcoal	2005	0.0134004	0.0191934	0.0356258
Eur	Urban	Charcoal	2005	0.000105337	0.00037231	0.002056
Sear	Urban	Charcoal	2005	0.0117476	0.0187072	0.0287217
Wpr	Urban	Charcoal	2005	0.0048787	0.0089996	0.0153413
Afr	Urban	Charcoal	2006	0.197639	0.220527	0.24288
Amr	Urban	Charcoal	2006	0.00853841	0.0119863	0.0200322
Emr	Urban	Charcoal	2006	0.0142545	0.0212065	0.0359916
Eur	Urban	Charcoal	2006	9.22435e-05	0.000321325	0.00259368
Sear	Urban	Charcoal	2006	0.0116958	0.0181198	0.030503
Wpr	Urban	Charcoal	2006	0.00502551	0.00935876	0.016483
Afr	Urban	Charcoal	2007	0.205817	0.226361	0.250225
Amr	Urban	Charcoal	2007	0.00875686	0.0124019	0.0209963
Emr	Urban	Charcoal	2007	0.0138665	0.0225168	0.0376147
Eur	Urban	Charcoal	2007	7.93499e-05	0.000294036	0.00218984
Sear	Urban	Charcoal	2007	0.0112482	0.0176323	0.0274157
Wpr	Urban	Charcoal	2007	0.00500601	0.00936694	0.0154204
Afr	Urban	Charcoal	2008	0.208705	0.232078	0.254741
Amr	Urban	Charcoal	2008	0.00871612	0.0126363	0.022551
Emr	Urban	Charcoal	2008	0.0148615	0.0246151	0.0379673
Eur	Urban	Charcoal	2008	8.02418e-05	0.000267304	0.0016404
Sear	Urban	Charcoal	2008	0.0106056	0.0172616	0.0282725
Wpr	Urban	Charcoal	2008	0.00500952	0.00961389	0.0162637
Afr	Urban	Charcoal	2009	0.216042	0.236559	0.258751
Amr	Urban	Charcoal	2009	0.00943706	0.0128233	0.0214554
Emr	Urban	Charcoal	2009	0.0159518	0.0269322	0.0397336
Eur	Urban	Charcoal	2009	6.37569e-05	0.000236051	0.00141063
Sear	Urban	Charcoal	2009	0.0104469	0.0165877	0.0271206
Wpr	Urban	Charcoal	2009	0.00487826	0.00967257	0.0161056
Afr	Urban	Charcoal	2010	0.219538	0.240835	0.265048
Amr	Urban	Charcoal	2010	0.00961589	0.0131514	0.0213942
Emr	Urban	Charcoal	2010	0.017443	0.0289393	0.0416986
Eur	Urban	Charcoal	2010	6.89404e-05	0.000221272	0.00143902
Sear	Urban	Charcoal	2010	0.00973191	0.0156159	0.02585
Wpr	Urban	Charcoal	2010	0.00555915	0.00980204	0.0159067
Afr	Urban	Charcoal	2011	0.223069	0.24517	0.270043
Amr	Urban	Charcoal	2011	0.00991353	0.0134622	0.022369
Emr	Urban	Charcoal	2011	0.018865	0.0304602	0.0433093
Eur	Urban	Charcoal	2011	5.8419e-05	0.000204369	0.00121151
Sear	Urban	Charcoal	2011	0.00857686	0.0149652	0.0262511
Wpr	Urban	Charcoal	2011	0.00542783	0.00978718	0.0153597
Afr	Urban	Charcoal	2012	0.226351	0.249274	0.273744
Amr	Urban	Charcoal	2012	0.00989302	0.0135494	0.0221898
Emr	Urban	Charcoal	2012	0.0189949	0.0315148	0.0432282
Eur	Urban	Charcoal	2012	5.64252e-05	0.000202489	0.00143672
Sear	Urban	Charcoal	2012	0.00819312	0.0141391	0.0255632
Wpr	Urban	Charcoal	2012	0.00531358	0.00983596	0.0161422
Afr	Urban	Charcoal	2013	0.227758	0.251961	0.277994
Amr	Urban	Charcoal	2013	0.00987265	0.013606	0.0223398
Emr	Urban	Charcoal	2013	0.0197626	0.0320723	0.0428572
Eur	Urban	Charcoal	2013	5.11902e-05	0.000199678	0.00132415
Sear	Urban	Charcoal	2013	0.00750839	0.0130725	0.0241223
Wpr	Urban	Charcoal	2013	0.00512529	0.0096634	0.0155333
Afr	Urban	Charcoal	2014	0.230865	0.255885	0.283199
Amr	Urban	Charcoal	2014	0.00947039	0.0136537	0.023643
Emr	Urban	Charcoal	2014	0.0202275	0.0324946	0.043056
Eur	Urban	Charcoal	2014	4.67591e-05	0.000193433	0.00113348
Sear	Urban	Charcoal	2014	0.00658855	0.0120555	0.0233596
Wpr	Urban	Charcoal	2014	0.00521528	0.00912105	0.0154673
Afr	Urban	Charcoal	2015	0.231878	0.259319	0.287694
Amr	Urban	Charcoal	2015	0.0097439	0.013776	0.0236034
Emr	Urban	Charcoal	2015	0.0208959	0.0326238	0.0451352
Eur	Urban	Charcoal	2015	4.043e-05	0.000193119	0.00151115
Sear	Urban	Charcoal	2015	0.00559687	0.0111706	0.0239129
Wpr	Urban	Charcoal	2015	0.00488492	0.00900674	0.0156065
Afr	Urban	Charcoal	2016	0.232509	0.261135	0.290766
Amr	Urban	Charcoal	2016	0.0096118	0.0140745	0.0238473
Emr	Urban	Charcoal	2016	0.0218329	0.0333365	0.0461179
Eur	Urban	Charcoal	2016	4.20171e-05	0.000196705	0.00129468
Sear	Urban	Charcoal	2016	0.00469014	0.0100785	0.0221317
Wpr	Urban	Charcoal	2016	0.00450193	0.00828915	0.0141656
Afr	Urban	Charcoal	2017	0.232601	0.263427	0.298033
Amr	Urban	Charcoal	2017	0.00958589	0.0140014	0.0251104
Emr	Urban	Charcoal	2017	0.0224067	0.0336526	0.0470781
Eur	Urban	Charcoal	2017	3.91601e-05	0.000185978	0.00146745
Sear	Urban	Charcoal	2017	0.004003	0.0095469	0.0229281
Wpr	Urban	Charcoal	2017	0.00424018	0.00784096	0.0140915
Afr	Urban	Charcoal	2018	0.230629	0.265666	0.303166
Amr	Urban	Charcoal	2018	0.00975943	0.0139362	0.0248767
Emr	Urban	Charcoal	2018	0.0220205	0.0336361	0.0489704
Eur	Urban	Charcoal	2018	3.59694e-05	0.000202055	0.00165623
Sear	Urban	Charcoal	2018	0.00358676	0.00892667	0.023406
Wpr	Urban	Charcoal	2018	0.003901	0.00726191	0.0140796
Afr	Urban	Charcoal	2019	0.230785	0.267298	0.308108
Amr	Urban	Charcoal	2019	0.00916307	0.0141388	0.0255202
Emr	Urban	Charcoal	2019	0.0218211	0.0336099	0.0499931
Eur	Urban	Charcoal	2019	3.26627e-05	0.000208354	0.00169088
Sear	Urban	Charcoal	2019	0.00300057	0.00852883	0.0225815
Wpr	Urban	Charcoal	2019	0.00340488	0.0069686	0.013473
Afr	Urban	Charcoal	2020	0.226951	0.270177	0.313913
Amr	Urban	Charcoal	2020	0.00888584	0.0143462	0.0300574
Emr	Urban	Charcoal	2020	0.0218247	0.033807	0.0504976
Eur	Urban	Charcoal	2020	2.90682e-05	0.000214887	0.00237878
Sear	Urban	Charcoal	2020	0.0025755	0.00800718	0.0232918
Wpr	Urban	Charcoal	2020	0.00325544	0.00665891	0.0136754
Afr	Urban	Charcoal	2021	0.227338	0.270735	0.319064
Amr	Urban	Charcoal	2021	0.00893834	0.0143719	0.0306425
Emr	Urban	Charcoal	2021	0.0219323	0.0341148	0.053616
Eur	Urban	Charcoal	2021	3.30751e-05	0.000232062	0.00278996
Sear	Urban	Charcoal	2021	0.00196101	0.00778718	0.0261564
Wpr	Urban	Charcoal	2021	0.00263272	0.00617915	0.0135872
Afr	Urban	Charcoal	2022	0.222355	0.273605	0.330171
Amr	Urban	Charcoal	2022	0.00836962	0.0146451	0.0307717
Emr	Urban	Charcoal	2022	0.0213303	0.0338105	0.0556908
Eur	Urban	Charcoal	2022	2.76668e-05	0.000243824	0.00307771
Sear	Urban	Charcoal	2022	0.00179226	0.00741327	0.0289175
Wpr	Urban	Charcoal	2022	0.00244049	0.00585998	0.0139147
Afr	Urban	Charcoal	2023	0.22069	0.274486	0.337202
Amr	Urban	Charcoal	2023	0.00822165	0.0148558	0.0332189
Emr	Urban	Charcoal	2023	0.0214456	0.0336289	0.055767
Eur	Urban	Charcoal	2023	3.04919e-05	0.000246191	0.00349619
Sear	Urban	Charcoal	2023	0.00176932	0.00731794	0.0310061
Wpr	Urban	Charcoal	2023	0.00226084	0.00542123	0.0143484
Afr	Urban	Charcoal	2024	0.215851	0.273279	0.342935
Amr	Urban	Charcoal	2024	0.00760495	0.0150442	0.0349171
Emr	Urban	Charcoal	2024	0.0205671	0.034653	0.0599387
Eur	Urban	Charcoal	2024	2.86321e-05	0.000275257	0.00576725
Sear	Urban	Charcoal	2024	0.00120516	0.00714125	0.0300743
Wpr	Urban	Charcoal	2024	0.00198272	0.00525011	0.0152176
Afr	Urban	Charcoal	2025	0.21488	0.275745	0.351802
Amr	Urban	Charcoal	2025	0.00757478	0.0151673	0.0411147
Emr	Urban	Charcoal	2025	0.0201168	0.0345455	0.0601475
Eur	Urban	Charcoal	2025	2.78428e-05	0.000309011	0.005743
Sear	Urban	Charcoal	2025	0.00122615	0.00692327	0.0303046
Wpr	Urban	Charcoal	2025	0.00186469	0.00499383	0.0156012
Afr	Urban	Charcoal	2026	0.211543	0.27811	0.356229
Amr	Urban	Charcoal	2026	0.00743307	0.0153927	0.0450295
Emr	Urban	Charcoal	2026	0.0193428	0.0344311	0.0638147
Eur	Urban	Charcoal	2026	2.37227e-05	0.000324838	0.00543053
Sear	Urban	Charcoal	2026	0.000946151	0.00682405	0.0370818
Wpr	Urban	Charcoal	2026	0.00158321	0.00482955	0.0160398
Afr	Urban	Charcoal	2027	0.206332	0.278494	0.364977
Amr	Urban	Charcoal	2027	0.00703504	0.0154117	0.0470178
Emr	Urban	Charcoal	2027	0.0184566	0.0340743	0.0668644
Eur	Urban	Charcoal	2027	2.45751e-05	0.000337032	0.00611356
Sear	Urban	Charcoal	2027	0.000699351	0.00679867	0.0384748
Wpr	Urban	Charcoal	2027	0.00138387	0.00450794	0.0149833
Afr	Urban	Charcoal	2028	0.203151	0.278163	0.373627
Amr	Urban	Charcoal	2028	0.00614319	0.0159748	0.0470052
Emr	Urban	Charcoal	2028	0.0180816	0.0347101	0.0701715
Eur	Urban	Charcoal	2028	2.30954e-05	0.000367339	0.00944577
Sear	Urban	Charcoal	2028	0.000666643	0.006743	0.0369796
Wpr	Urban	Charcoal	2028	0.00136307	0.00418615	0.0160972
Afr	Urban	Charcoal	2029	0.199325	0.275465	0.375613
Amr	Urban	Charcoal	2029	0.00594392	0.0158586	0.0537443
Emr	Urban	Charcoal	2029	0.0158067	0.0355314	0.0746617
Eur	Urban	Charcoal	2029	2.72104e-05	0.000393215	0.0125346
Sear	Urban	Charcoal	2029	0.000781099	0.00670134	0.0437056
Wpr	Urban	Charcoal	2029	0.00122883	0.00412352	0.0179421
Afr	Urban	Charcoal	2030	0.196796	0.279242	0.387396
Amr	Urban	Charcoal	2030	0.00583816	0.0162114	0.0635203
Emr	Urban	Charcoal	2030	0.016364	0.0353363	0.0778318
Eur	Urban	Charcoal	2030	2.57254e-05	0.000475022	0.0112141
Sear	Urban	Charcoal	2030	0.00066411	0.0065053	0.0446744
Wpr	Urban	Charcoal	2030	0.001052	0.003974	0.0164912
Afr	Urban	Coal	1990	0.00418635	0.0133139	0.0372714
Amr	Urban	Coal	1990	0.00057615	0.00361868	0.00629446
Emr	Urban	Coal	1990	5.90211e-06	0.000497127	0.0114771
Eur	Urban	Coal	1990	0.00242852	0.0148895	0.0700531
Sear	Urban	Coal	1990	0.0381387	0.0802787	0.130779
Wpr	Urban	Coal	1990	0.0243894	0.210815	0.582369
Afr	Urban	Coal	1991	0.0036038	0.0125598	0.0360995
Amr	Urban	Coal	1991	0.000699735	0.00298816	0.00568807
Emr	Urban	Coal	1991	4.91264e-06	0.000397992	0.00998785
Eur	Urban	Coal	1991	0.00259766	0.014517	0.0596581
Sear	Urban	Coal	1991	0.038943	0.0758078	0.117241
Wpr	Urban	Coal	1991	0.0267899	0.219403	0.581203
Afr	Urban	Coal	1992	0.00370561	0.0119099	0.0321425
Amr	Urban	Coal	1992	0.000600933	0.0025129	0.00479582
Emr	Urban	Coal	1992	4.95527e-06	0.0003478	0.00870384
Eur	Urban	Coal	1992	0.00251836	0.0139151	0.0565224
Sear	Urban	Coal	1992	0.0330859	0.0671156	0.108829
Wpr	Urban	Coal	1992	0.0349639	0.216029	0.543674
Afr	Urban	Coal	1993	0.00382134	0.0114505	0.0310524
Amr	Urban	Coal	1993	0.000496227	0.00213717	0.00421449
Emr	Urban	Coal	1993	3.12904e-06	0.000296377	0.00756267
Eur	Urban	Coal	1993	0.00296175	0.0131738	0.0523122
Sear	Urban	Coal	1993	0.0345634	0.0628508	0.102379
Wpr	Urban	Coal	1993	0.0426222	0.218755	0.495384
Afr	Urban	Coal	1994	0.00352159	0.0109342	0.0270025
Amr	Urban	Coal	1994	0.000477958	0.00184666	0.00370694
Emr	Urban	Coal	1994	4.17622e-06	0.000282254	0.00556467
Eur	Urban	Coal	1994	0.00278365	0.0127701	0.0449643
Sear	Urban	Coal	1994	0.031178	0.0592719	0.0949321
Wpr	Urban	Coal	1994	0.0453693	0.214403	0.476014
Afr	Urban	Coal	1995	0.00341787	0.01028	0.0247652
Amr	Urban	Coal	1995	0.000411383	0.00156633	0.00319786
Emr	Urban	Coal	1995	3.22138e-06	0.000267353	0.00508688
Eur	Urban	Coal	1995	0.00234531	0.0118452	0.0430678
Sear	Urban	Coal	1995	0.0288328	0.0551279	0.0855612
Wpr	Urban	Coal	1995	0.0484564	0.21245	0.461349
Afr	Urban	Coal	1996	0.00310303	0.0100432	0.0253931
Amr	Urban	Coal	1996	0.000296004	0.001382	0.00312099
Emr	Urban	Coal	1996	4.49834e-06	0.000249678	0.00358052
Eur	Urban	Coal	1996	0.00297419	0.0116053	0.0381463
Sear	Urban	Coal	1996	0.0282274	0.0515131	0.0782957
Wpr	Urban	Coal	1996	0.0585903	0.215574	0.425395
Afr	Urban	Coal	1997	0.00321169	0.00970624	0.0234803
Amr	Urban	Coal	1997	0.000351556	0.00120384	0.00255161
Emr	Urban	Coal	1997	3.12684e-06	0.000207751	0.00349871
Eur	Urban	Coal	1997	0.00244615	0.0105223	0.0337588
Sear	Urban	Coal	1997	0.0239937	0.0486253	0.0776438
Wpr	Urban	Coal	1997	0.0586715	0.213333	0.412533
Afr	Urban	Coal	1998	0.00282609	0.00906655	0.0217687
Amr	Urban	Coal	1998	0.000263687	0.00112585	0.00247673
Emr	Urban	Coal	1998	4.39934e-06	0.000181848	0.0033652
Eur	Urban	Coal	1998	0.00261164	0.00970426	0.0303282
Sear	Urban	Coal	1998	0.0238467	0.045845	0.0701089
Wpr	Urban	Coal	1998	0.0782173	0.205578	0.38043
Afr	Urban	Coal	1999	0.00286805	0.00852486	0.0194722
Amr	Urban	Coal	1999	0.00026232	0.00102221	0.00223315
Emr	Urban	Coal	1999	3.40965e-06	0.00016672	0.00341269
Eur	Urban	Coal	1999	0.00256458	0.00925863	0.0270129
Sear	Urban	Coal	1999	0.0221843	0.0435686	0.067068
Wpr	Urban	Coal	1999	0.0798602	0.199267	0.364064
Afr	Urban	Coal	2000	0.00260441	0.00835975	0.0193149
Amr	Urban	Coal	2000	0.000210494	0.000979315	0.00227711
Emr	Urban	Coal	2000	3.83209e-06	0.000173796	0.00255675
Eur	Urban	Coal	2000	0.0023651	0.00848562	0.0235153
Sear	Urban	Coal	2000	0.0231511	0.0417733	0.0652838
Wpr	Urban	Coal	2000	0.0751246	0.197653	0.343351
Afr	Urban	Coal	2001	0.00223208	0.00796541	0.018123
Amr	Urban	Coal	2001	0.000157269	0.00101945	0.0022952
Emr	Urban	Coal	2001	2.66425e-06	0.000158784	0.00249917
Eur	Urban	Coal	2001	0.00234928	0.00748946	0.021514
Sear	Urban	Coal	2001	0.0232936	0.0410556	0.0621168
Wpr	Urban	Coal	2001	0.0760142	0.186389	0.332657
Afr	Urban	Coal	2002	0.00237523	0.00811966	0.0186431
Amr	Urban	Coal	2002	0.000154626	0.00102212	0.00231275
Emr	Urban	Coal	2002	4.96995e-06	0.000171537	0.00217079
Eur	Urban	Coal	2002	0.00197061	0.00700566	0.0180347
Sear	Urban	Coal	2002	0.0217902	0.0395897	0.0620776
Wpr	Urban	Coal	2002	0.0736254	0.177036	0.318286
Afr	Urban	Coal	2003	0.00225006	0.00772233	0.017714
Amr	Urban	Coal	2003	0.000136474	0.00100787	0.00243273
Emr	Urban	Coal	2003	4.13858e-06	0.000144474	0.00182303
Eur	Urban	Coal	2003	0.00188847	0.00628554	0.0175438
Sear	Urban	Coal	2003	0.0234208	0.039153	0.0599091
Wpr	Urban	Coal	2003	0.0659905	0.168338	0.291548
Afr	Urban	Coal	2004	0.00181054	0.00752291	0.0185785
Amr	Urban	Coal	2004	0.000140832	0.00100979	0.00237981
Emr	Urban	Coal	2004	6.04166e-06	0.000144393	0.00159103
Eur	Urban	Coal	2004	0.00202781	0.00583204	0.0156761
Sear	Urban	Coal	2004	0.0229939	0.0371364	0.0578447
Wpr	Urban	Coal	2004	0.0529196	0.160759	0.279079
Afr	Urban	Coal	2005	0.00176921	0.00790159	0.0181434
Amr	Urban	Coal	2005	0.000132924	0.00091899	0.00251186
Emr	Urban	Coal	2005	6.11878e-06	0.000163159	0.00154839
Eur	Urban	Coal	2005	0.00169034	0.00534725	0.0149056
Sear	Urban	Coal	2005	0.0226014	0.0368852	0.0584399
Wpr	Urban	Coal	2005	0.055937	0.151039	0.275073
Afr	Urban	Coal	2006	0.0017108	0.00760438	0.0177197
Amr	Urban	Coal	2006	9.23663e-05	0.000897265	0.00246034
Emr	Urban	Coal	2006	5.57348e-06	0.00016454	0.00158711
Eur	Urban	Coal	2006	0.00147328	0.00472257	0.0130937
Sear	Urban	Coal	2006	0.0223613	0.0365045	0.055995
Wpr	Urban	Coal	2006	0.0529455	0.137302	0.263611
Afr	Urban	Coal	2007	0.00137218	0.00789877	0.0189809
Amr	Urban	Coal	2007	6.94306e-05	0.00087128	0.00245857
Emr	Urban	Coal	2007	8.03041e-06	0.000163163	0.00179144
Eur	Urban	Coal	2007	0.00129788	0.00420313	0.0126165
Sear	Urban	Coal	2007	0.0227995	0.0354369	0.0532276
Wpr	Urban	Coal	2007	0.0468476	0.127282	0.237605
Afr	Urban	Coal	2008	0.00145887	0.00798698	0.0187362
Amr	Urban	Coal	2008	6.44558e-05	0.000765867	0.00240698
Emr	Urban	Coal	2008	8.02319e-06	0.000170378	0.00164227
Eur	Urban	Coal	2008	0.001094	0.00411223	0.0122035
Sear	Urban	Coal	2008	0.0211021	0.0340617	0.0518284
Wpr	Urban	Coal	2008	0.0401981	0.117246	0.219395
Afr	Urban	Coal	2009	0.00149665	0.00817592	0.0201449
Amr	Urban	Coal	2009	5.47097e-05	0.000742552	0.00238723
Emr	Urban	Coal	2009	9.25337e-06	0.000184994	0.00224029
Eur	Urban	Coal	2009	0.000948527	0.0035959	0.0121856
Sear	Urban	Coal	2009	0.0220407	0.0338206	0.0522547
Wpr	Urban	Coal	2009	0.0346721	0.106651	0.210568
Afr	Urban	Coal	2010	0.00126908	0.00872689	0.0200287
Amr	Urban	Coal	2010	4.5662e-05	0.000670641	0.00209486
Emr	Urban	Coal	2010	1.07933e-05	0.000215454	0.0021007
Eur	Urban	Coal	2010	0.000825779	0.00322538	0.0122713
Sear	Urban	Coal	2010	0.020236	0.0328903	0.0499837
Wpr	Urban	Coal	2010	0.0321625	0.0946962	0.197133
Afr	Urban	Coal	2011	0.0015459	0.00986799	0.0212298
Amr	Urban	Coal	2011	3.62491e-05	0.000591897	0.00203428
Emr	Urban	Coal	2011	1.11896e-05	0.000220574	0.00225968
Eur	Urban	Coal	2011	0.000747985	0.00302542	0.0135667
Sear	Urban	Coal	2011	0.0209333	0.0324822	0.048706
Wpr	Urban	Coal	2011	0.0269195	0.0863326	0.176058
Afr	Urban	Coal	2012	0.00142203	0.00981752	0.0228466
Amr	Urban	Coal	2012	3.27412e-05	0.00048319	0.00194841
Emr	Urban	Coal	2012	1.24582e-05	0.000231294	0.00282381
Eur	Urban	Coal	2012	0.000657465	0.0030915	0.0169616
Sear	Urban	Coal	2012	0.0194241	0.0312224	0.0475606
Wpr	Urban	Coal	2012	0.0219844	0.0786606	0.17138
Afr	Urban	Coal	2013	0.00155861	0.0112247	0.0266504
Amr	Urban	Coal	2013	3.01693e-05	0.000401206	0.00156767
Emr	Urban	Coal	2013	1.28081e-05	0.000250245	0.00298056
Eur	Urban	Coal	2013	0.000581629	0.00280529	0.0187194
Sear	Urban	Coal	2013	0.0188949	0.0297198	0.0473122
Wpr	Urban	Coal	2013	0.0196037	0.0685706	0.161792
Afr	Urban	Coal	2014	0.00180606	0.0118672	0.0266071
Amr	Urban	Coal	2014	2.44734e-05	0.000358486	0.0015832
Emr	Urban	Coal	2014	8.78673e-06	0.000288353	0.00332544
Eur	Urban	Coal	2014	0.000511514	0.0028088	0.0250039
Sear	Urban	Coal	2014	0.0184812	0.0290297	0.045202
Wpr	Urban	Coal	2014	0.0123515	0.0631228	0.164325
Afr	Urban	Coal	2015	0.00194448	0.0132388	0.0300645
Amr	Urban	Coal	2015	2.57673e-05	0.000299442	0.00142887
Emr	Urban	Coal	2015	1.2716e-05	0.000293765	0.00315317
Eur	Urban	Coal	2015	0.000480596	0.00287112	0.0283173
Sear	Urban	Coal	2015	0.0164816	0.0273545	0.0443144
Wpr	Urban	Coal	2015	0.0127455	0.0576239	0.174208
Afr	Urban	Coal	2016	0.00209646	0.0147844	0.032835
Amr	Urban	Coal	2016	2.41292e-05	0.000285576	0.00136705
Emr	Urban	Coal	2016	1.37537e-05	0.000338505	0.00395372
Eur	Urban	Coal	2016	0.000355483	0.00301975	0.040402
Sear	Urban	Coal	2016	0.015775	0.0269147	0.0454217
Wpr	Urban	Coal	2016	0.00783602	0.0522907	0.167378
Afr	Urban	Coal	2017	0.00233774	0.0167131	0.0368418
Amr	Urban	Coal	2017	1.97636e-05	0.000256306	0.00151715
Emr	Urban	Coal	2017	1.3549e-05	0.000371139	0.00387705
Eur	Urban	Coal	2017	0.000297697	0.00297276	0.0451585
Sear	Urban	Coal	2017	0.0155981	0.0253517	0.0438303
Wpr	Urban	Coal	2017	0.00662339	0.0477281	0.157405
Afr	Urban	Coal	2018	0.00255959	0.0180085	0.0399302
Amr	Urban	Coal	2018	1.90959e-05	0.000225342	0.00135979
Emr	Urban	Coal	2018	1.21412e-05	0.000414358	0.00434
Eur	Urban	Coal	2018	0.000308807	0.00322133	0.0625373
Sear	Urban	Coal	2018	0.0142656	0.0242209	0.0442938
Wpr	Urban	Coal	2018	0.00434784	0.0426535	0.167342
Afr	Urban	Coal	2019	0.00291441	0.0190461	0.0459093
Amr	Urban	Coal	2019	1.72798e-05	0.000224442	0.0013343
Emr	Urban	Coal	2019	1.18434e-05	0.000557437	0.0051383
Eur	Urban	Coal	2019	0.000275531	0.00324016	0.0713581
Sear	Urban	Coal	2019	0.0128508	0.0225952	0.0460755
Wpr	Urban	Coal	2019	0.00324947	0.0366862	0.172674
Afr	Urban	Coal	2020	0.00328595	0.0214983	0.0531894
Amr	Urban	Coal	2020	1.8122e-05	0.000198182	0.00136975
Emr	Urban	Coal	2020	1.55189e-05	0.000552656	0.0065641
Eur	Urban	Coal	2020	0.00024501	0.00353799	0.0843968
Sear	Urban	Coal	2020	0.0129222	0.0220673	0.0456471
Wpr	Urban	Coal	2020	0.00203265	0.0342141	0.189248
Afr	Urban	Coal	2021	0.0037906	0.0232272	0.0560253
Amr	Urban	Coal	2021	1.6838e-05	0.000200338	0.00143089
Emr	Urban	Coal	2021	1.43051e-05	0.000616948	0.00661926
Eur	Urban	Coal	2021	0.000320417	0.00386972	0.100921
Sear	Urban	Coal	2021	0.0119886	0.0205704	0.0465447
Wpr	Urban	Coal	2021	0.00208108	0.0307295	0.183395
Afr	Urban	Coal	2022	0.00365178	0.0235288	0.068429
Amr	Urban	Coal	2022	1.6305e-05	0.000225637	0.00167913
Emr	Urban	Coal	2022	1.98679e-05	0.000705887	0.00897624
Eur	Urban	Coal	2022	0.000208441	0.00430381	0.108379
Sear	Urban	Coal	2022	0.0111197	0.0195489	0.0498245
Wpr	Urban	Coal	2022	0.00139726	0.0265733	0.199217
Afr	Urban	Coal	2023	0.00458498	0.0242346	0.0748875
Amr	Urban	Coal	2023	1.51226e-05	0.000254136	0.00169076
Emr	Urban	Coal	2023	1.99793e-05	0.000834574	0.0102833
Eur	Urban	Coal	2023	0.000229119	0.00445096	0.149704
Sear	Urban	Coal	2023	0.0106165	0.018477	0.0456636
Wpr	Urban	Coal	2023	0.00103468	0.0234083	0.201967
Afr	Urban	Coal	2024	0.00565845	0.0283267	0.0799898
Amr	Urban	Coal	2024	1.19716e-05	0.000216677	0.00175479
Emr	Urban	Coal	2024	2.45302e-05	0.000989983	0.0115749
Eur	Urban	Coal	2024	0.000224572	0.0050251	0.169657
Sear	Urban	Coal	2024	0.00882975	0.0175819	0.0470639
Wpr	Urban	Coal	2024	0.000743939	0.0202247	0.221111
Afr	Urban	Coal	2025	0.00586131	0.0291382	0.0929744
Amr	Urban	Coal	2025	1.73958e-05	0.000240586	0.00203242
Emr	Urban	Coal	2025	2.70665e-05	0.00104128	0.0138584
Eur	Urban	Coal	2025	0.000172908	0.0052998	0.178074
Sear	Urban	Coal	2025	0.00764222	0.0168624	0.0502267
Wpr	Urban	Coal	2025	0.000655396	0.017101	0.226992
Afr	Urban	Coal	2026	0.00675746	0.0293288	0.104727
Amr	Urban	Coal	2026	1.73682e-05	0.000259344	0.00230184
Emr	Urban	Coal	2026	3.07337e-05	0.00130073	0.0153708
Eur	Urban	Coal	2026	0.000214824	0.00552999	0.214283
Sear	Urban	Coal	2026	0.00739305	0.0160137	0.0491891
Wpr	Urban	Coal	2026	0.000518091	0.0157374	0.224626
Afr	Urban	Coal	2027	0.00745969	0.0314156	0.114591
Amr	Urban	Coal	2027	1.49619e-05	0.000281748	0.00219181
Emr	Urban	Coal	2027	2.2845e-05	0.00141437	0.0172315
Eur	Urban	Coal	2027	0.000197872	0.00619017	0.232099
Sear	Urban	Coal	2027	0.00655321	0.0153028	0.0539146
Wpr	Urban	Coal	2027	0.000354116	0.0138704	0.228255
Afr	Urban	Coal	2028	0.00816786	0.0340015	0.123458
Amr	Urban	Coal	2028	1.38058e-05	0.000302691	0.00292145
Emr	Urban	Coal	2028	3.49367e-05	0.00158721	0.0186664
Eur	Urban	Coal	2028	0.000144768	0.00631777	0.235547
Sear	Urban	Coal	2028	0.00515882	0.0146226	0.0562941
Wpr	Urban	Coal	2028	0.000418597	0.0125755	0.232347
Afr	Urban	Coal	2029	0.00943058	0.0386401	0.132517
Amr	Urban	Coal	2029	1.81184e-05	0.000314788	0.00365135
Emr	Urban	Coal	2029	3.11901e-05	0.00196742	0.0241421
Eur	Urban	Coal	2029	0.000170252	0.00740636	0.248457
Sear	Urban	Coal	2029	0.00470776	0.0140428	0.0497812
Wpr	Urban	Coal	2029	0.000305513	0.0105823	0.241191
Afr	Urban	Coal	2030	0.00926209	0.0396285	0.141007
Amr	Urban	Coal	2030	1.78244e-05	0.000354209	0.00452403
Emr	Urban	Coal	2030	3.65275e-05	0.00202106	0.0271966
Eur	Urban	Coal	2030	0.000147626	0.00802026	0.273347
Sear	Urban	Coal	2030	0.00434116	0.0136382	0.0533137
Wpr	Urban	Coal	2030	0.000250756	0.00902839	0.246694
Afr	Urban	Kerosene	1990	0.0867523	0.164213	0.254196
Amr	Urban	Kerosene	1990	0.0297228	0.0496629	0.0751247
Emr	Urban	Kerosene	1990	0.0169071	0.0765398	0.229292
Eur	Urban	Kerosene	1990	0.00205167	0.0112465	0.056238
Sear	Urban	Kerosene	1990	0.199624	0.26425	0.338354
Wpr	Urban	Kerosene	1990	0.0115575	0.0212958	0.0373795
Afr	Urban	Kerosene	1991	0.0881623	0.168185	0.246695
Amr	Urban	Kerosene	1991	0.0289023	0.0465022	0.0679814
Emr	Urban	Kerosene	1991	0.0183288	0.0718033	0.202968
Eur	Urban	Kerosene	1991	0.00184298	0.00981089	0.0525449
Sear	Urban	Kerosene	1991	0.20802	0.269554	0.338521
Wpr	Urban	Kerosene	1991	0.0126965	0.0208974	0.0408532
Afr	Urban	Kerosene	1992	0.0951684	0.168882	0.246432
Amr	Urban	Kerosene	1992	0.0275101	0.0436514	0.0631858
Emr	Urban	Kerosene	1992	0.0172292	0.0662428	0.190617
Eur	Urban	Kerosene	1992	0.00179201	0.00898548	0.0498703
Sear	Urban	Kerosene	1992	0.216554	0.277503	0.346763
Wpr	Urban	Kerosene	1992	0.0132905	0.0211835	0.0362389
Afr	Urban	Kerosene	1993	0.0994649	0.168961	0.242439
Amr	Urban	Kerosene	1993	0.0269862	0.0408754	0.0605458
Emr	Urban	Kerosene	1993	0.016171	0.060321	0.161929
Eur	Urban	Kerosene	1993	0.00148994	0.00850531	0.0425878
Sear	Urban	Kerosene	1993	0.226848	0.284443	0.351496
Wpr	Urban	Kerosene	1993	0.01358	0.0212816	0.0364335
Afr	Urban	Kerosene	1994	0.106203	0.170044	0.237095
Amr	Urban	Kerosene	1994	0.0259461	0.0381094	0.0555987
Emr	Urban	Kerosene	1994	0.0159913	0.0553697	0.148714
Eur	Urban	Kerosene	1994	0.00110586	0.0073167	0.0426464
Sear	Urban	Kerosene	1994	0.226607	0.287534	0.354658
Wpr	Urban	Kerosene	1994	0.0131106	0.020928	0.0353162
Afr	Urban	Kerosene	1995	0.108823	0.171554	0.237463
Amr	Urban	Kerosene	1995	0.0244277	0.0352297	0.050426
Emr	Urban	Kerosene	1995	0.0142814	0.0512419	0.130933
Eur	Urban	Kerosene	1995	0.00112762	0.00695892	0.0319099
Sear	Urban	Kerosene	1995	0.231416	0.288341	0.351866
Wpr	Urban	Kerosene	1995	0.0134516	0.0207513	0.0374347
Afr	Urban	Kerosene	1996	0.113354	0.170597	0.229996
Amr	Urban	Kerosene	1996	0.0229463	0.0323615	0.0470325
Emr	Urban	Kerosene	1996	0.0143278	0.044782	0.117826
Eur	Urban	Kerosene	1996	0.00105976	0.00604818	0.0320987
Sear	Urban	Kerosene	1996	0.230191	0.287961	0.350774
Wpr	Urban	Kerosene	1996	0.012223	0.02016	0.0374477
Afr	Urban	Kerosene	1997	0.115348	0.171322	0.225174
Amr	Urban	Kerosene	1997	0.0210264	0.0294066	0.045087
Emr	Urban	Kerosene	1997	0.0130506	0.0410097	0.104737
Eur	Urban	Kerosene	1997	0.000854652	0.00538934	0.0289947
Sear	Urban	Kerosene	1997	0.226348	0.282686	0.34372
Wpr	Urban	Kerosene	1997	0.0120084	0.0192643	0.0351363
Afr	Urban	Kerosene	1998	0.121122	0.169981	0.223412
Amr	Urban	Kerosene	1998	0.0186937	0.0261375	0.0398132
Emr	Urban	Kerosene	1998	0.0134097	0.0377444	0.0939624
Eur	Urban	Kerosene	1998	0.000824351	0.00484094	0.0237516
Sear	Urban	Kerosene	1998	0.22066	0.276556	0.332676
Wpr	Urban	Kerosene	1998	0.0115621	0.0178679	0.0321311
Afr	Urban	Kerosene	1999	0.123005	0.167283	0.218372
Amr	Urban	Kerosene	1999	0.0163753	0.0228604	0.0372834
Emr	Urban	Kerosene	1999	0.0126763	0.0331025	0.0872794
Eur	Urban	Kerosene	1999	0.00060666	0.00416084	0.0264619
Sear	Urban	Kerosene	1999	0.214954	0.266991	0.322081
Wpr	Urban	Kerosene	1999	0.0102553	0.0162866	0.0341535
Afr	Urban	Kerosene	2000	0.126806	0.167329	0.210193
Amr	Urban	Kerosene	2000	0.0139482	0.0196146	0.0323284
Emr	Urban	Kerosene	2000	0.0109988	0.0295016	0.0740719
Eur	Urban	Kerosene	2000	0.000574175	0.00374472	0.021586
Sear	Urban	Kerosene	2000	0.200933	0.255641	0.314911
Wpr	Urban	Kerosene	2000	0.00871136	0.0144029	0.0281113
Afr	Urban	Kerosene	2001	0.128551	0.164721	0.201316
Amr	Urban	Kerosene	2001	0.011926	0.0167836	0.0297966
Emr	Urban	Kerosene	2001	0.00958048	0.0269993	0.0748371
Eur	Urban	Kerosene	2001	0.000493101	0.00355813	0.0216248
Sear	Urban	Kerosene	2001	0.191825	0.241298	0.29731
Wpr	Urban	Kerosene	2001	0.00739282	0.0126511	0.0286376
Afr	Urban	Kerosene	2002	0.129792	0.163163	0.200305
Amr	Urban	Kerosene	2002	0.00980255	0.014062	0.0269119
Emr	Urban	Kerosene	2002	0.00880747	0.0229594	0.0610703
Eur	Urban	Kerosene	2002	0.000435087	0.00318255	0.0207371
Sear	Urban	Kerosene	2002	0.179103	0.225941	0.282024
Wpr	Urban	Kerosene	2002	0.00621614	0.011084	0.0227438
Afr	Urban	Kerosene	2003	0.128439	0.160593	0.195865
Amr	Urban	Kerosene	2003	0.00774361	0.0116725	0.0228977
Emr	Urban	Kerosene	2003	0.00846468	0.0209576	0.0567584
Eur	Urban	Kerosene	2003	0.000381234	0.00279796	0.0181518
Sear	Urban	Kerosene	2003	0.162575	0.21	0.267574
Wpr	Urban	Kerosene	2003	0.00537873	0.00953106	0.0262
Afr	Urban	Kerosene	2004	0.124944	0.159428	0.192876
Amr	Urban	Kerosene	2004	0.00591228	0.00969969	0.0228788
Emr	Urban	Kerosene	2004	0.00782667	0.0190665	0.0511513
Eur	Urban	Kerosene	2004	0.000290361	0.00278733	0.0170846
Sear	Urban	Kerosene	2004	0.146289	0.196464	0.2467
Wpr	Urban	Kerosene	2004	0.00439183	0.00809723	0.0209919
Afr	Urban	Kerosene	2005	0.127769	0.156707	0.189281
Amr	Urban	Kerosene	2005	0.00491562	0.00792384	0.0194421
Emr	Urban	Kerosene	2005	0.00653051	0.0172374	0.0468714
Eur	Urban	Kerosene	2005	0.000310801	0.0023756	0.0170259
Sear	Urban	Kerosene	2005	0.133017	0.177647	0.226474
Wpr	Urban	Kerosene	2005	0.00341615	0.0070896	0.0209977
Afr	Urban	Kerosene	2006	0.127972	0.155037	0.188413
Amr	Urban	Kerosene	2006	0.00356954	0.00646139	0.0183883
Emr	Urban	Kerosene	2006	0.00596786	0.014937	0.0458393
Eur	Urban	Kerosene	2006	0.000319457	0.00215144	0.0155071
Sear	Urban	Kerosene	2006	0.114241	0.158234	0.205528
Wpr	Urban	Kerosene	2006	0.00274538	0.00604425	0.0214951
Afr	Urban	Kerosene	2007	0.12262	0.154991	0.183159
Amr	Urban	Kerosene	2007	0.00272127	0.00546364	0.0164168
Emr	Urban	Kerosene	2007	0.00555749	0.0141074	0.0396907
Eur	Urban	Kerosene	2007	0.00023132	0.00197818	0.0179105
Sear	Urban	Kerosene	2007	0.0954507	0.136287	0.181348
Wpr	Urban	Kerosene	2007	0.00223077	0.00507701	0.0199493
Afr	Urban	Kerosene	2008	0.126865	0.153065	0.183537
Amr	Urban	Kerosene	2008	0.00229461	0.00462617	0.0154759
Emr	Urban	Kerosene	2008	0.00545897	0.0128753	0.0405369
Eur	Urban	Kerosene	2008	0.000223663	0.0020791	0.0184011
Sear	Urban	Kerosene	2008	0.0750166	0.116768	0.165345
Wpr	Urban	Kerosene	2008	0.00186308	0.00443584	0.0242499
Afr	Urban	Kerosene	2009	0.123351	0.150861	0.179469
Amr	Urban	Kerosene	2009	0.00181572	0.00401448	0.015689
Emr	Urban	Kerosene	2009	0.00495232	0.0122446	0.0371012
Eur	Urban	Kerosene	2009	0.000274865	0.00210304	0.0208216
Sear	Urban	Kerosene	2009	0.0603828	0.0967643	0.148357
Wpr	Urban	Kerosene	2009	0.0016382	0.00398797	0.0205902
Afr	Urban	Kerosene	2010	0.119596	0.148461	0.177611
Amr	Urban	Kerosene	2010	0.00156243	0.00343975	0.0142508
Emr	Urban	Kerosene	2010	0.00455088	0.0112019	0.0351765
Eur	Urban	Kerosene	2010	0.000215991	0.00221243	0.0188335
Sear	Urban	Kerosene	2010	0.0486513	0.0805371	0.125906
Wpr	Urban	Kerosene	2010	0.00137333	0.0034482	0.025017
Afr	Urban	Kerosene	2011	0.118616	0.145566	0.174988
Amr	Urban	Kerosene	2011	0.0014372	0.00316246	0.015154
Emr	Urban	Kerosene	2011	0.00431287	0.0106992	0.0376349
Eur	Urban	Kerosene	2011	0.000236441	0.00222754	0.0197247
Sear	Urban	Kerosene	2011	0.0338312	0.0664388	0.106712
Wpr	Urban	Kerosene	2011	0.00118264	0.00321487	0.0218326
Afr	Urban	Kerosene	2012	0.113742	0.140319	0.168001
Amr	Urban	Kerosene	2012	0.00126549	0.00309548	0.0142884
Emr	Urban	Kerosene	2012	0.0039847	0.0106959	0.040937
Eur	Urban	Kerosene	2012	0.000247951	0.00231845	0.0231173
Sear	Urban	Kerosene	2012	0.0271803	0.0550151	0.0948016
Wpr	Urban	Kerosene	2012	0.00103705	0.00289506	0.0221782
Afr	Urban	Kerosene	2013	0.107234	0.135389	0.164798
Amr	Urban	Kerosene	2013	0.00120486	0.00302115	0.0136868
Emr	Urban	Kerosene	2013	0.00385815	0.00986008	0.039008
Eur	Urban	Kerosene	2013	0.000213095	0.00246188	0.023102
Sear	Urban	Kerosene	2013	0.0210512	0.0454422	0.0892848
Wpr	Urban	Kerosene	2013	0.000853283	0.00261687	0.0171056
Afr	Urban	Kerosene	2014	0.101234	0.128469	0.154913
Amr	Urban	Kerosene	2014	0.00105537	0.00296044	0.0135467
Emr	Urban	Kerosene	2014	0.00374276	0.00968149	0.0365353
Eur	Urban	Kerosene	2014	0.000274077	0.00257027	0.0298216
Sear	Urban	Kerosene	2014	0.0139374	0.0387749	0.0758332
Wpr	Urban	Kerosene	2014	0.000873928	0.00257909	0.0261592
Afr	Urban	Kerosene	2015	0.0921374	0.117825	0.144853
Amr	Urban	Kerosene	2015	0.00104198	0.00297898	0.0149426
Emr	Urban	Kerosene	2015	0.0035258	0.0102449	0.040229
Eur	Urban	Kerosene	2015	0.000216883	0.00271394	0.0244377
Sear	Urban	Kerosene	2015	0.0140867	0.0337987	0.0713121
Wpr	Urban	Kerosene	2015	0.000780958	0.00248824	0.0195558
Afr	Urban	Kerosene	2016	0.084133	0.106611	0.132938
Amr	Urban	Kerosene	2016	0.00107059	0.00304865	0.0155549
Emr	Urban	Kerosene	2016	0.00336707	0.0093161	0.0425273
Eur	Urban	Kerosene	2016	0.000289923	0.00301318	0.0367723
Sear	Urban	Kerosene	2016	0.00930587	0.028832	0.0674858
Wpr	Urban	Kerosene	2016	0.000679086	0.00236463	0.0233804
Afr	Urban	Kerosene	2017	0.0718508	0.094634	0.118632
Amr	Urban	Kerosene	2017	0.00110267	0.00330035	0.0139059
Emr	Urban	Kerosene	2017	0.00343435	0.00999138	0.0494666
Eur	Urban	Kerosene	2017	0.000264474	0.00287629	0.0404788
Sear	Urban	Kerosene	2017	0.00787466	0.0256447	0.0590938
Wpr	Urban	Kerosene	2017	0.000608807	0.00217773	0.0258462
Afr	Urban	Kerosene	2018	0.0597644	0.0818074	0.108259
Amr	Urban	Kerosene	2018	0.00106505	0.00348188	0.0144537
Emr	Urban	Kerosene	2018	0.00329803	0.0101045	0.0478436
Eur	Urban	Kerosene	2018	0.00028554	0.00353983	0.0456137
Sear	Urban	Kerosene	2018	0.00571877	0.0227003	0.0591859
Wpr	Urban	Kerosene	2018	0.000599155	0.00212168	0.0295003
Afr	Urban	Kerosene	2019	0.0488156	0.0691466	0.0942388
Amr	Urban	Kerosene	2019	0.00119373	0.00373507	0.0154826
Emr	Urban	Kerosene	2019	0.00312261	0.0107548	0.0544914
Eur	Urban	Kerosene	2019	0.000333278	0.00350692	0.0484256
Sear	Urban	Kerosene	2019	0.00452061	0.0199515	0.058105
Wpr	Urban	Kerosene	2019	0.000484991	0.00217844	0.0334613
Afr	Urban	Kerosene	2020	0.0388242	0.0581449	0.0796343
Amr	Urban	Kerosene	2020	0.00124586	0.0040014	0.0162352
Emr	Urban	Kerosene	2020	0.00311467	0.0104577	0.0567437
Eur	Urban	Kerosene	2020	0.000508743	0.00411906	0.0529018
Sear	Urban	Kerosene	2020	0.00348751	0.0183745	0.0570841
Wpr	Urban	Kerosene	2020	0.000469996	0.00207102	0.026963
Afr	Urban	Kerosene	2021	0.0317822	0.0488135	0.071154
Amr	Urban	Kerosene	2021	0.00129297	0.00454731	0.0171632
Emr	Urban	Kerosene	2021	0.00301883	0.0108489	0.0632532
Eur	Urban	Kerosene	2021	0.000437642	0.00441383	0.0756562
Sear	Urban	Kerosene	2021	0.00255283	0.0163431	0.0548853
Wpr	Urban	Kerosene	2021	0.000502308	0.0021688	0.0290675
Afr	Urban	Kerosene	2022	0.0248031	0.0415609	0.0654597
Amr	Urban	Kerosene	2022	0.00142755	0.00502977	0.0174102
Emr	Urban	Kerosene	2022	0.00303857	0.011356	0.065305
Eur	Urban	Kerosene	2022	0.000435799	0.0048433	0.0944621
Sear	Urban	Kerosene	2022	0.00198753	0.0151049	0.0583738
Wpr	Urban	Kerosene	2022	0.000467734	0.00218812	0.0388441
Afr	Urban	Kerosene	2023	0.0210197	0.0354761	0.0589795
Amr	Urban	Kerosene	2023	0.00132672	0.00580291	0.0207533
Emr	Urban	Kerosene	2023	0.002681	0.0124184	0.0855795
Eur	Urban	Kerosene	2023	0.000542963	0.0055295	0.0973708
Sear	Urban	Kerosene	2023	0.0011843	0.0128346	0.0580272
Wpr	Urban	Kerosene	2023	0.000433749	0.00219315	0.0373511
Afr	Urban	Kerosene	2024	0.0180262	0.0321487	0.0587641
Amr	Urban	Kerosene	2024	0.0015069	0.00593091	0.0215244
Emr	Urban	Kerosene	2024	0.00321368	0.0125572	0.0864819
Eur	Urban	Kerosene	2024	0.00057605	0.00647675	0.118709
Sear	Urban	Kerosene	2024	0.000988028	0.0118604	0.0568571
Wpr	Urban	Kerosene	2024	0.000451622	0.00227966	0.0421315
Afr	Urban	Kerosene	2025	0.0149597	0.0292093	0.0559361
Amr	Urban	Kerosene	2025	0.00170565	0.00694363	0.0243227
Emr	Urban	Kerosene	2025	0.00313411	0.0135932	0.0955213
Eur	Urban	Kerosene	2025	0.000624052	0.00660663	0.137796
Sear	Urban	Kerosene	2025	0.00105016	0.0114969	0.0580453
Wpr	Urban	Kerosene	2025	0.000377343	0.00231543	0.0453966
Afr	Urban	Kerosene	2026	0.0134397	0.0276851	0.0579335
Amr	Urban	Kerosene	2026	0.00177944	0.00760998	0.0270214
Emr	Urban	Kerosene	2026	0.00327196	0.0145987	0.0974527
Eur	Urban	Kerosene	2026	0.000759511	0.0073822	0.153362
Sear	Urban	Kerosene	2026	0.000795815	0.0104595	0.0643117
Wpr	Urban	Kerosene	2026	0.000404583	0.00241364	0.0544226
Afr	Urban	Kerosene	2027	0.0128239	0.0268395	0.0632643
Amr	Urban	Kerosene	2027	0.00192892	0.00840436	0.0299989
Emr	Urban	Kerosene	2027	0.00296458	0.0162213	0.115781
Eur	Urban	Kerosene	2027	0.000737922	0.00850492	0.167503
Sear	Urban	Kerosene	2027	0.000616473	0.0101031	0.062016
Wpr	Urban	Kerosene	2027	0.000405184	0.00236965	0.0552006
Afr	Urban	Kerosene	2028	0.0116197	0.0262504	0.0644446
Amr	Urban	Kerosene	2028	0.00199529	0.00936743	0.0342559
Emr	Urban	Kerosene	2028	0.00324611	0.0164424	0.118052
Eur	Urban	Kerosene	2028	0.000859877	0.00942379	0.17735
Sear	Urban	Kerosene	2028	0.000642061	0.00909421	0.064263
Wpr	Urban	Kerosene	2028	0.00038164	0.00247722	0.0685936
Afr	Urban	Kerosene	2029	0.0107985	0.0261615	0.0702881
Amr	Urban	Kerosene	2029	0.00216026	0.0099483	0.0378624
Emr	Urban	Kerosene	2029	0.00316686	0.0180929	0.129553
Eur	Urban	Kerosene	2029	0.000958315	0.0106366	0.195162
Sear	Urban	Kerosene	2029	0.000503094	0.00860106	0.0763922
Wpr	Urban	Kerosene	2029	0.000412385	0.00263946	0.091594
Afr	Urban	Kerosene	2030	0.0107657	0.0256014	0.0730186
Amr	Urban	Kerosene	2030	0.00233191	0.0110575	0.0407749
Emr	Urban	Kerosene	2030	0.00319776	0.0203809	0.142133
Eur	Urban	Kerosene	2030	0.000900592	0.0118391	0.222361
Sear	Urban	Kerosene	2030	0.00046153	0.0076604	0.0686924
Wpr	Urban	Kerosene	2030	0.000399233	0.00284898	0.114122
Afr	Urban	Gas	1990	0.123068	0.171993	0.219437
Amr	Urban	Gas	1990	0.756301	0.817306	0.860979
Emr	Urban	Gas	1990	0.569711	0.711457	0.828647
Eur	Urban	Gas	1990	0.468668	0.668841	0.833271
Sear	Urban	Gas	1990	0.193896	0.262596	0.338823
Wpr	Urban	Gas	1990	0.190773	0.592151	0.847074
Afr	Urban	Gas	1991	0.127773	0.172778	0.216812
Amr	Urban	Gas	1991	0.773769	0.828778	0.864571
Emr	Urban	Gas	1991	0.581016	0.72584	0.828058
Eur	Urban	Gas	1991	0.497394	0.688774	0.832684
Sear	Urban	Gas	1991	0.203477	0.272093	0.34883
Wpr	Urban	Gas	1991	0.211182	0.588611	0.845721
Afr	Urban	Gas	1992	0.129445	0.173936	0.20978
Amr	Urban	Gas	1992	0.787008	0.83729	0.87337
Emr	Urban	Gas	1992	0.59947	0.734176	0.821988
Eur	Urban	Gas	1992	0.518767	0.700884	0.838977
Sear	Urban	Gas	1992	0.221097	0.285197	0.361739
Wpr	Urban	Gas	1992	0.262441	0.596239	0.842887
Afr	Urban	Gas	1993	0.13698	0.17431	0.203585
Amr	Urban	Gas	1993	0.795385	0.846393	0.877324
Emr	Urban	Gas	1993	0.628617	0.741594	0.827156
Eur	Urban	Gas	1993	0.551919	0.710556	0.837795
Sear	Urban	Gas	1993	0.232491	0.299547	0.367537
Wpr	Urban	Gas	1993	0.277576	0.59915	0.834283
Afr	Urban	Gas	1994	0.143879	0.175486	0.202579
Amr	Urban	Gas	1994	0.804559	0.853222	0.883781
Emr	Urban	Gas	1994	0.6453	0.753325	0.822431
Eur	Urban	Gas	1994	0.584254	0.725045	0.836806
Sear	Urban	Gas	1994	0.237578	0.309162	0.386796
Wpr	Urban	Gas	1994	0.315541	0.605344	0.8321
Afr	Urban	Gas	1995	0.146661	0.175662	0.198433
Amr	Urban	Gas	1995	0.814074	0.861772	0.887664
Emr	Urban	Gas	1995	0.66897	0.760825	0.827191
Eur	Urban	Gas	1995	0.611489	0.739107	0.843065
Sear	Urban	Gas	1995	0.257339	0.323776	0.402429
Wpr	Urban	Gas	1995	0.346706	0.612351	0.832786
Afr	Urban	Gas	1996	0.14932	0.176481	0.197292
Amr	Urban	Gas	1996	0.829747	0.869694	0.894316
Emr	Urban	Gas	1996	0.683765	0.77146	0.832359
Eur	Urban	Gas	1996	0.640357	0.751413	0.840972
Sear	Urban	Gas	1996	0.261877	0.336295	0.412134
Wpr	Urban	Gas	1996	0.369558	0.613031	0.817731
Afr	Urban	Gas	1997	0.15513	0.177753	0.196724
Amr	Urban	Gas	1997	0.835909	0.875084	0.899824
Emr	Urban	Gas	1997	0.695658	0.779296	0.837163
Eur	Urban	Gas	1997	0.665765	0.764653	0.846076
Sear	Urban	Gas	1997	0.278286	0.349973	0.427873
Wpr	Urban	Gas	1997	0.386132	0.618661	0.82774
Afr	Urban	Gas	1998	0.158582	0.177893	0.195325
Amr	Urban	Gas	1998	0.837646	0.881621	0.905972
Emr	Urban	Gas	1998	0.707846	0.787584	0.838707
Eur	Urban	Gas	1998	0.695359	0.779688	0.84618
Sear	Urban	Gas	1998	0.296739	0.368519	0.438403
Wpr	Urban	Gas	1998	0.422543	0.622453	0.803377
Afr	Urban	Gas	1999	0.158696	0.179253	0.195323
Amr	Urban	Gas	1999	0.850886	0.888551	0.910339
Emr	Urban	Gas	1999	0.731676	0.795597	0.843317
Eur	Urban	Gas	1999	0.70534	0.788726	0.857155
Sear	Urban	Gas	1999	0.311882	0.382133	0.456447
Wpr	Urban	Gas	1999	0.444207	0.635876	0.799319
Afr	Urban	Gas	2000	0.164563	0.180253	0.195531
Amr	Urban	Gas	2000	0.852355	0.893202	0.914597
Emr	Urban	Gas	2000	0.740994	0.804435	0.846925
Eur	Urban	Gas	2000	0.726228	0.800898	0.858524
Sear	Urban	Gas	2000	0.322358	0.398324	0.475893
Wpr	Urban	Gas	2000	0.468553	0.636708	0.804029
Afr	Urban	Gas	2001	0.162896	0.181417	0.196657
Amr	Urban	Gas	2001	0.857681	0.898978	0.919115
Emr	Urban	Gas	2001	0.748057	0.811209	0.852119
Eur	Urban	Gas	2001	0.741467	0.810605	0.869401
Sear	Urban	Gas	2001	0.337134	0.419298	0.493308
Wpr	Urban	Gas	2001	0.458873	0.647951	0.803065
Afr	Urban	Gas	2002	0.1678	0.182427	0.195087
Amr	Urban	Gas	2002	0.863292	0.903938	0.924813
Emr	Urban	Gas	2002	0.766199	0.821333	0.859052
Eur	Urban	Gas	2002	0.755276	0.821341	0.869452
Sear	Urban	Gas	2002	0.35693	0.433643	0.517457
Wpr	Urban	Gas	2002	0.471353	0.654334	0.804233
Afr	Urban	Gas	2003	0.169214	0.183364	0.19638
Amr	Urban	Gas	2003	0.867358	0.906156	0.925539
Emr	Urban	Gas	2003	0.774716	0.827491	0.863865
Eur	Urban	Gas	2003	0.756081	0.828435	0.876316
Sear	Urban	Gas	2003	0.372673	0.452553	0.534092
Wpr	Urban	Gas	2003	0.495771	0.659891	0.810065
Afr	Urban	Gas	2004	0.170181	0.184731	0.199323
Amr	Urban	Gas	2004	0.875947	0.910372	0.930967
Emr	Urban	Gas	2004	0.786539	0.835116	0.873723
Eur	Urban	Gas	2004	0.764605	0.836045	0.88178
Sear	Urban	Gas	2004	0.397871	0.471434	0.552026
Wpr	Urban	Gas	2004	0.510456	0.660197	0.824215
Afr	Urban	Gas	2005	0.172358	0.186467	0.199248
Amr	Urban	Gas	2005	0.877566	0.913181	0.930822
Emr	Urban	Gas	2005	0.800904	0.843205	0.878651
Eur	Urban	Gas	2005	0.775398	0.839983	0.883393
Sear	Urban	Gas	2005	0.405154	0.495044	0.57405
Wpr	Urban	Gas	2005	0.490602	0.667899	0.812267
Afr	Urban	Gas	2006	0.173895	0.187383	0.200557
Amr	Urban	Gas	2006	0.877699	0.915003	0.932685
Emr	Urban	Gas	2006	0.804552	0.853178	0.886092
Eur	Urban	Gas	2006	0.77472	0.84029	0.887992
Sear	Urban	Gas	2006	0.438875	0.516451	0.588202
Wpr	Urban	Gas	2006	0.509163	0.665846	0.820703
Afr	Urban	Gas	2007	0.175915	0.188883	0.201676
Amr	Urban	Gas	2007	0.880642	0.916972	0.934119
Emr	Urban	Gas	2007	0.818854	0.862404	0.892897
Eur	Urban	Gas	2007	0.774128	0.844535	0.892523
Sear	Urban	Gas	2007	0.465984	0.543398	0.625438
Wpr	Urban	Gas	2007	0.512436	0.672618	0.818095
Afr	Urban	Gas	2008	0.176018	0.190538	0.204237
Amr	Urban	Gas	2008	0.886844	0.918591	0.936056
Emr	Urban	Gas	2008	0.82511	0.868206	0.898171
Eur	Urban	Gas	2008	0.764814	0.844464	0.892166
Sear	Urban	Gas	2008	0.485257	0.569495	0.648108
Wpr	Urban	Gas	2008	0.502514	0.666102	0.812524
Afr	Urban	Gas	2009	0.177571	0.191791	0.204793
Amr	Urban	Gas	2009	0.887567	0.919692	0.936678
Emr	Urban	Gas	2009	0.836118	0.875329	0.904926
Eur	Urban	Gas	2009	0.766826	0.841644	0.898292
Sear	Urban	Gas	2009	0.503229	0.592969	0.667621
Wpr	Urban	Gas	2009	0.506656	0.667771	0.807394
Afr	Urban	Gas	2010	0.178641	0.193569	0.207833
Amr	Urban	Gas	2010	0.886882	0.920472	0.936325
Emr	Urban	Gas	2010	0.84116	0.880689	0.911
Eur	Urban	Gas	2010	0.75661	0.842536	0.894378
Sear	Urban	Gas	2010	0.532763	0.618888	0.694551
Wpr	Urban	Gas	2010	0.497034	0.668032	0.812377
Afr	Urban	Gas	2011	0.181104	0.195365	0.209752
Amr	Urban	Gas	2011	0.88761	0.92008	0.937216
Emr	Urban	Gas	2011	0.841635	0.883548	0.911208
Eur	Urban	Gas	2011	0.757991	0.837031	0.8965
Sear	Urban	Gas	2011	0.555213	0.639548	0.71521
Wpr	Urban	Gas	2011	0.491131	0.660016	0.796413
Afr	Urban	Gas	2012	0.184098	0.198142	0.212976
Amr	Urban	Gas	2012	0.889867	0.920805	0.938095
Emr	Urban	Gas	2012	0.841917	0.886631	0.914624
Eur	Urban	Gas	2012	0.735993	0.835344	0.897083
Sear	Urban	Gas	2012	0.575547	0.662945	0.738738
Wpr	Urban	Gas	2012	0.477178	0.655145	0.805593
Afr	Urban	Gas	2013	0.185576	0.201619	0.216334
Amr	Urban	Gas	2013	0.890687	0.920819	0.937813
Emr	Urban	Gas	2013	0.844616	0.889894	0.917773
Eur	Urban	Gas	2013	0.725039	0.831552	0.897621
Sear	Urban	Gas	2013	0.597012	0.682694	0.759659
Wpr	Urban	Gas	2013	0.470051	0.646556	0.797118
Afr	Urban	Gas	2014	0.189291	0.206055	0.224148
Amr	Urban	Gas	2014	0.890969	0.920141	0.93793
Emr	Urban	Gas	2014	0.84572	0.891219	0.919768
Eur	Urban	Gas	2014	0.705448	0.825582	0.896236
Sear	Urban	Gas	2014	0.612799	0.704507	0.777087
Wpr	Urban	Gas	2014	0.445262	0.634196	0.820873
Afr	Urban	Gas	2015	0.195029	0.211864	0.228349
Amr	Urban	Gas	2015	0.888221	0.919986	0.936596
Emr	Urban	Gas	2015	0.838095	0.890149	0.920782
Eur	Urban	Gas	2015	0.68292	0.823783	0.897301
Sear	Urban	Gas	2015	0.617357	0.719583	0.793841
Wpr	Urban	Gas	2015	0.411689	0.618051	0.809275
Afr	Urban	Gas	2016	0.201945	0.219027	0.237504
Amr	Urban	Gas	2016	0.882417	0.919072	0.9372
Emr	Urban	Gas	2016	0.837179	0.889946	0.923038
Eur	Urban	Gas	2016	0.67123	0.816129	0.894136
Sear	Urban	Gas	2016	0.623058	0.730442	0.814213
Wpr	Urban	Gas	2016	0.374366	0.613074	0.812665
Afr	Urban	Gas	2017	0.203473	0.22696	0.248104
Amr	Urban	Gas	2017	0.889303	0.918041	0.938394
Emr	Urban	Gas	2017	0.829283	0.889473	0.922512
Eur	Urban	Gas	2017	0.641059	0.80709	0.897518
Sear	Urban	Gas	2017	0.637174	0.746505	0.821707
Wpr	Urban	Gas	2017	0.352329	0.592043	0.81189
Afr	Urban	Gas	2018	0.212158	0.235561	0.260227
Amr	Urban	Gas	2018	0.884885	0.916207	0.935859
Emr	Urban	Gas	2018	0.826116	0.888919	0.923228
Eur	Urban	Gas	2018	0.623205	0.797868	0.897464
Sear	Urban	Gas	2018	0.639544	0.754126	0.837095
Wpr	Urban	Gas	2018	0.297952	0.570911	0.824606
Afr	Urban	Gas	2019	0.215117	0.244795	0.272467
Amr	Urban	Gas	2019	0.87797	0.915326	0.93599
Emr	Urban	Gas	2019	0.808767	0.884063	0.923835
Eur	Urban	Gas	2019	0.593486	0.783933	0.897232
Sear	Urban	Gas	2019	0.632782	0.765388	0.850091
Wpr	Urban	Gas	2019	0.271154	0.552266	0.825445
Afr	Urban	Gas	2020	0.221999	0.251404	0.283571
Amr	Urban	Gas	2020	0.873382	0.912227	0.93466
Emr	Urban	Gas	2020	0.795171	0.882096	0.921903
Eur	Urban	Gas	2020	0.586636	0.772444	0.895527
Sear	Urban	Gas	2020	0.638682	0.771845	0.856592
Wpr	Urban	Gas	2020	0.219972	0.535999	0.832025
Afr	Urban	Gas	2021	0.222528	0.257175	0.295819
Amr	Urban	Gas	2021	0.868775	0.909757	0.933579
Emr	Urban	Gas	2021	0.786213	0.878031	0.924925
Eur	Urban	Gas	2021	0.564412	0.759095	0.891149
Sear	Urban	Gas	2021	0.632842	0.77935	0.86648
Wpr	Urban	Gas	2021	0.189584	0.515682	0.830102
Afr	Urban	Gas	2022	0.223475	0.260829	0.300423
Amr	Urban	Gas	2022	0.864033	0.906941	0.934781
Emr	Urban	Gas	2022	0.764992	0.872744	0.920474
Eur	Urban	Gas	2022	0.531642	0.753048	0.884417
Sear	Urban	Gas	2022	0.628101	0.783889	0.874242
Wpr	Urban	Gas	2022	0.172694	0.487731	0.852575
Afr	Urban	Gas	2023	0.22311	0.263129	0.305957
Amr	Urban	Gas	2023	0.852793	0.903024	0.931666
Emr	Urban	Gas	2023	0.748405	0.867704	0.920202
Eur	Urban	Gas	2023	0.520439	0.736964	0.888244
Sear	Urban	Gas	2023	0.612462	0.789382	0.880287
Wpr	Urban	Gas	2023	0.147783	0.473438	0.859803
Afr	Urban	Gas	2024	0.222386	0.264337	0.314779
Amr	Urban	Gas	2024	0.850213	0.900216	0.931764
Emr	Urban	Gas	2024	0.733455	0.862676	0.922625
Eur	Urban	Gas	2024	0.507218	0.719662	0.881823
Sear	Urban	Gas	2024	0.599713	0.793918	0.882265
Wpr	Urban	Gas	2024	0.12976	0.445201	0.854613
Afr	Urban	Gas	2025	0.217805	0.264797	0.316768
Amr	Urban	Gas	2025	0.838867	0.89459	0.928753
Emr	Urban	Gas	2025	0.718476	0.85749	0.919211
Eur	Urban	Gas	2025	0.492951	0.70442	0.880249
Sear	Urban	Gas	2025	0.566863	0.794335	0.891674
Wpr	Urban	Gas	2025	0.114206	0.424061	0.863261
Afr	Urban	Gas	2026	0.21205	0.262228	0.315233
Amr	Urban	Gas	2026	0.828969	0.889795	0.928136
Emr	Urban	Gas	2026	0.701516	0.849154	0.916534
Eur	Urban	Gas	2026	0.479806	0.693241	0.87652
Sear	Urban	Gas	2026	0.56525	0.794386	0.898825
Wpr	Urban	Gas	2026	0.107039	0.402603	0.856212
Afr	Urban	Gas	2027	0.204763	0.259536	0.315812
Amr	Urban	Gas	2027	0.814234	0.887127	0.926179
Emr	Urban	Gas	2027	0.683544	0.843691	0.911748
Eur	Urban	Gas	2027	0.475936	0.677894	0.872744
Sear	Urban	Gas	2027	0.522666	0.793608	0.901332
Wpr	Urban	Gas	2027	0.101893	0.37927	0.880743
Afr	Urban	Gas	2028	0.202613	0.25713	0.317032
Amr	Urban	Gas	2028	0.797478	0.880663	0.925113
Emr	Urban	Gas	2028	0.673469	0.833874	0.913458
Eur	Urban	Gas	2028	0.457557	0.660747	0.872545
Sear	Urban	Gas	2028	0.501073	0.796086	0.9086
Wpr	Urban	Gas	2028	0.0866028	0.358641	0.888689
Afr	Urban	Gas	2029	0.192484	0.252979	0.320361
Amr	Urban	Gas	2029	0.785724	0.874145	0.921994
Emr	Urban	Gas	2029	0.652368	0.82533	0.912705
Eur	Urban	Gas	2029	0.447679	0.634474	0.869993
Sear	Urban	Gas	2029	0.476837	0.787428	0.909718
Wpr	Urban	Gas	2029	0.0877701	0.335215	0.87512
Afr	Urban	Gas	2030	0.190639	0.248635	0.319388
Amr	Urban	Gas	2030	0.769595	0.867498	0.920444
Emr	Urban	Gas	2030	0.640521	0.815392	0.907627
Eur	Urban	Gas	2030	0.433951	0.623933	0.863102
Sear	Urban	Gas	2030	0.43974	0.790622	0.915057
Wpr	Urban	Gas	2030	0.0785472	0.315112	0.881032
Afr	Urban	Electricity	1990	0.106657	0.142525	0.194691
Amr	Urban	Electricity	1990	0.038267	0.0496059	0.0710558
Emr	Urban	Electricity	1990	0.00305214	0.0173499	0.0729839
Eur	Urban	Electricity	1990	0.0966344	0.242766	0.43634
Sear	Urban	Electricity	1990	0.00559575	0.0139627	0.0308021
Wpr	Urban	Electricity	1990	0.00431933	0.0140591	0.117787
Afr	Urban	Electricity	1991	0.110818	0.141497	0.191528
Amr	Urban	Electricity	1991	0.0367816	0.0475181	0.0666229
Emr	Urban	Electricity	1991	0.00295459	0.0161574	0.069056
Eur	Urban	Electricity	1991	0.0991259	0.232134	0.419877
Sear	Urban	Electricity	1991	0.00560956	0.013243	0.0279124
Wpr	Urban	Electricity	1991	0.00477241	0.0140439	0.10468
Afr	Urban	Electricity	1992	0.108546	0.140392	0.187806
Amr	Urban	Electricity	1992	0.0358084	0.0463112	0.065603
Emr	Urban	Electricity	1992	0.00328324	0.0145649	0.0619915
Eur	Urban	Electricity	1992	0.0961891	0.2275	0.396174
Sear	Urban	Electricity	1992	0.00522514	0.0123619	0.0277125
Wpr	Urban	Electricity	1992	0.00452171	0.0145944	0.0933616
Afr	Urban	Electricity	1993	0.112006	0.139835	0.181154
Amr	Urban	Electricity	1993	0.0337647	0.0441941	0.0628089
Emr	Urban	Electricity	1993	0.00361039	0.0143823	0.0551056
Eur	Urban	Electricity	1993	0.107387	0.221096	0.367921
Sear	Urban	Electricity	1993	0.00523909	0.0120947	0.0253617
Wpr	Urban	Electricity	1993	0.00445115	0.0151056	0.101716
Afr	Urban	Electricity	1994	0.109152	0.13781	0.181345
Amr	Urban	Electricity	1994	0.0322782	0.0424223	0.0582647
Emr	Urban	Electricity	1994	0.00333524	0.013841	0.0474026
Eur	Urban	Electricity	1994	0.110691	0.212078	0.348113
Sear	Urban	Electricity	1994	0.00470108	0.0113763	0.0242814
Wpr	Urban	Electricity	1994	0.00456545	0.015152	0.0773274
Afr	Urban	Electricity	1995	0.107776	0.136693	0.176597
Amr	Urban	Electricity	1995	0.0304574	0.0407709	0.0565548
Emr	Urban	Electricity	1995	0.00342906	0.0133975	0.0435767
Eur	Urban	Electricity	1995	0.110948	0.204881	0.313388
Sear	Urban	Electricity	1995	0.00441843	0.010538	0.0234467
Wpr	Urban	Electricity	1995	0.00438644	0.0160099	0.0808428
Afr	Urban	Electricity	1996	0.108224	0.135726	0.173521
Amr	Urban	Electricity	1996	0.0283319	0.0384091	0.0547924
Emr	Urban	Electricity	1996	0.00351875	0.0131949	0.0372804
Eur	Urban	Electricity	1996	0.1111	0.196927	0.303439
Sear	Urban	Electricity	1996	0.00427005	0.0102165	0.0219319
Wpr	Urban	Electricity	1996	0.00439487	0.0176407	0.0840309
Afr	Urban	Electricity	1997	0.107898	0.133881	0.168142
Amr	Urban	Electricity	1997	0.0264832	0.0364023	0.0543441
Emr	Urban	Electricity	1997	0.00307884	0.0122759	0.0386364
Eur	Urban	Electricity	1997	0.110478	0.187079	0.281695
Sear	Urban	Electricity	1997	0.00429847	0.0101264	0.019791
Wpr	Urban	Electricity	1997	0.00408406	0.0178391	0.0808189
Afr	Urban	Electricity	1998	0.108743	0.134175	0.166253
Amr	Urban	Electricity	1998	0.0249192	0.0341582	0.0540875
Emr	Urban	Electricity	1998	0.00332406	0.0109704	0.0343351
Eur	Urban	Electricity	1998	0.113857	0.17426	0.260531
Sear	Urban	Electricity	1998	0.00422262	0.00929894	0.0202761
Wpr	Urban	Electricity	1998	0.00449679	0.0195415	0.0964117
Afr	Urban	Electricity	1999	0.107394	0.132861	0.160656
Amr	Urban	Electricity	1999	0.0236204	0.0323838	0.0517109
Emr	Urban	Electricity	1999	0.00299722	0.0109991	0.0334359
Eur	Urban	Electricity	1999	0.107391	0.168643	0.243689
Sear	Urban	Electricity	1999	0.00384207	0.00921109	0.0189582
Wpr	Urban	Electricity	1999	0.00499348	0.0220959	0.0805466
Afr	Urban	Electricity	2000	0.106098	0.131556	0.157916
Amr	Urban	Electricity	2000	0.0218283	0.0303706	0.0460509
Emr	Urban	Electricity	2000	0.00314039	0.010689	0.0312828
Eur	Urban	Electricity	2000	0.105925	0.160713	0.234115
Sear	Urban	Electricity	2000	0.00357416	0.00878281	0.0209231
Wpr	Urban	Electricity	2000	0.00514196	0.0229368	0.0870573
Afr	Urban	Electricity	2001	0.108232	0.130944	0.156275
Amr	Urban	Electricity	2001	0.0206724	0.0292097	0.0452645
Emr	Urban	Electricity	2001	0.00315623	0.0102886	0.0284608
Eur	Urban	Electricity	2001	0.0962392	0.151725	0.211475
Sear	Urban	Electricity	2001	0.00395744	0.00907678	0.019297
Wpr	Urban	Electricity	2001	0.00569758	0.0244722	0.0901319
Afr	Urban	Electricity	2002	0.108984	0.13063	0.152066
Amr	Urban	Electricity	2002	0.0195734	0.0274026	0.0433833
Emr	Urban	Electricity	2002	0.00322526	0.00943218	0.0296581
Eur	Urban	Electricity	2002	0.0969497	0.143612	0.205813
Sear	Urban	Electricity	2002	0.00410862	0.00909366	0.0204655
Wpr	Urban	Electricity	2002	0.00599576	0.0269546	0.0932914
Afr	Urban	Electricity	2003	0.107455	0.129655	0.150667
Amr	Urban	Electricity	2003	0.0190699	0.0263365	0.0433959
Emr	Urban	Electricity	2003	0.00321923	0.00945311	0.0260128
Eur	Urban	Electricity	2003	0.0933484	0.136896	0.199625
Sear	Urban	Electricity	2003	0.00430898	0.009442	0.0200482
Wpr	Urban	Electricity	2003	0.00692202	0.0304637	0.105659
Afr	Urban	Electricity	2004	0.108045	0.129302	0.151108
Amr	Urban	Electricity	2004	0.0174739	0.0254276	0.0408373
Emr	Urban	Electricity	2004	0.00283002	0.00904797	0.0256855
Eur	Urban	Electricity	2004	0.0897575	0.131132	0.191013
Sear	Urban	Electricity	2004	0.00446826	0.00969584	0.0215477
Wpr	Urban	Electricity	2004	0.00825019	0.0362155	0.126028
Afr	Urban	Electricity	2005	0.107472	0.128792	0.147476
Amr	Urban	Electricity	2005	0.016905	0.0247734	0.0404179
Emr	Urban	Electricity	2005	0.00299385	0.00872198	0.0244979
Eur	Urban	Electricity	2005	0.0880961	0.129783	0.18584
Sear	Urban	Electricity	2005	0.00490517	0.0103791	0.0225085
Wpr	Urban	Electricity	2005	0.00861074	0.0404727	0.119651
Afr	Urban	Electricity	2006	0.109648	0.128009	0.145944
Amr	Urban	Electricity	2006	0.0168933	0.0237948	0.0406745
Emr	Urban	Electricity	2006	0.00306257	0.00868653	0.0271992
Eur	Urban	Electricity	2006	0.0843754	0.127953	0.179231
Sear	Urban	Electricity	2006	0.00557824	0.0110392	0.0227658
Wpr	Urban	Electricity	2006	0.0112462	0.0470988	0.130374
Afr	Urban	Electricity	2007	0.109182	0.127022	0.144188
Amr	Urban	Electricity	2007	0.0159855	0.0233018	0.0382106
Emr	Urban	Electricity	2007	0.00303496	0.00860424	0.0256309
Eur	Urban	Electricity	2007	0.0802909	0.123393	0.187082
Sear	Urban	Electricity	2007	0.00570952	0.0119502	0.0247437
Wpr	Urban	Electricity	2007	0.0133238	0.0560599	0.15039
Afr	Urban	Electricity	2008	0.108892	0.125979	0.141762
Amr	Urban	Electricity	2008	0.0160875	0.0229041	0.037833
Emr	Urban	Electricity	2008	0.00279993	0.00891472	0.02435
Eur	Urban	Electricity	2008	0.0822317	0.122044	0.1786
Sear	Urban	Electricity	2008	0.00586745	0.0125955	0.0275249
Wpr	Urban	Electricity	2008	0.0164151	0.0668226	0.172518
Afr	Urban	Electricity	2009	0.109554	0.125849	0.141934
Amr	Urban	Electricity	2009	0.0155539	0.0223727	0.037139
Emr	Urban	Electricity	2009	0.00296887	0.00871821	0.0235966
Eur	Urban	Electricity	2009	0.0748733	0.12297	0.182534
Sear	Urban	Electricity	2009	0.0068478	0.0133875	0.0289817
Wpr	Urban	Electricity	2009	0.0200107	0.0733921	0.175772
Afr	Urban	Electricity	2010	0.108715	0.125196	0.14041
Amr	Urban	Electricity	2010	0.0156691	0.0222612	0.0365753
Emr	Urban	Electricity	2010	0.00315196	0.00914212	0.0264243
Eur	Urban	Electricity	2010	0.0787642	0.122579	0.188934
Sear	Urban	Electricity	2010	0.00762315	0.0145348	0.0350198
Wpr	Urban	Electricity	2010	0.0244212	0.0859922	0.198046
Afr	Urban	Electricity	2011	0.109946	0.124733	0.139714
Amr	Urban	Electricity	2011	0.0154907	0.0222937	0.0373659
Emr	Urban	Electricity	2011	0.00301188	0.0099089	0.0321435
Eur	Urban	Electricity	2011	0.0741861	0.122076	0.186444
Sear	Urban	Electricity	2011	0.00865875	0.0153048	0.0340938
Wpr	Urban	Electricity	2011	0.0320259	0.0999717	0.210654
Afr	Urban	Electricity	2012	0.108898	0.124863	0.141458
Amr	Urban	Electricity	2012	0.0152907	0.0221266	0.0370017
Emr	Urban	Electricity	2012	0.00333455	0.00994672	0.0283631
Eur	Urban	Electricity	2012	0.0715644	0.123944	0.198738
Sear	Urban	Electricity	2012	0.00905028	0.0167404	0.0408243
Wpr	Urban	Electricity	2012	0.03314	0.115136	0.234402
Afr	Urban	Electricity	2013	0.109712	0.124449	0.139725
Amr	Urban	Electricity	2013	0.0150309	0.0224114	0.0358336
Emr	Urban	Electricity	2013	0.00353379	0.0106516	0.0310314
Eur	Urban	Electricity	2013	0.0709309	0.122101	0.216478
Sear	Urban	Electricity	2013	0.0103693	0.0182107	0.0423417
Wpr	Urban	Electricity	2013	0.0364493	0.13216	0.262881
Afr	Urban	Electricity	2014	0.108709	0.124823	0.141587
Amr	Urban	Electricity	2014	0.015664	0.02232	0.0360328
Emr	Urban	Electricity	2014	0.00344275	0.0113098	0.0324077
Eur	Urban	Electricity	2014	0.070485	0.123681	0.220467
Sear	Urban	Electricity	2014	0.0108267	0.0196674	0.0438972
Wpr	Urban	Electricity	2014	0.0361516	0.146648	0.285635
Afr	Urban	Electricity	2015	0.110216	0.124785	0.141765
Amr	Urban	Electricity	2015	0.0154382	0.0227869	0.037394
Emr	Urban	Electricity	2015	0.00363914	0.0121897	0.0399442
Eur	Urban	Electricity	2015	0.0675565	0.121648	0.230834
Sear	Urban	Electricity	2015	0.0119315	0.0212485	0.0517672
Wpr	Urban	Electricity	2015	0.0419481	0.16071	0.338856
Afr	Urban	Electricity	2016	0.11054	0.125208	0.143263
Amr	Urban	Electricity	2016	0.0154929	0.0228532	0.0367163
Emr	Urban	Electricity	2016	0.00381131	0.0129564	0.0406032
Eur	Urban	Electricity	2016	0.0691939	0.123085	0.255914
Sear	Urban	Electricity	2016	0.0122727	0.0226368	0.0568829
Wpr	Urban	Electricity	2016	0.0427247	0.178323	0.37055
Afr	Urban	Electricity	2017	0.10874	0.124916	0.144943
Amr	Urban	Electricity	2017	0.0156998	0.0237447	0.0387559
Emr	Urban	Electricity	2017	0.00374159	0.0132487	0.0430973
Eur	Urban	Electricity	2017	0.0665643	0.122376	0.256826
Sear	Urban	Electricity	2017	0.013403	0.0245003	0.0631499
Wpr	Urban	Electricity	2017	0.0453861	0.190737	0.403847
Afr	Urban	Electricity	2018	0.108613	0.124694	0.147713
Amr	Urban	Electricity	2018	0.0157019	0.0242302	0.0405923
Emr	Urban	Electricity	2018	0.00444455	0.0145766	0.0471706
Eur	Urban	Electricity	2018	0.0661451	0.124939	0.272775
Sear	Urban	Electricity	2018	0.0145868	0.0267938	0.0697642
Wpr	Urban	Electricity	2018	0.0367858	0.207173	0.466434
Afr	Urban	Electricity	2019	0.106233	0.124329	0.147227
Amr	Urban	Electricity	2019	0.0158317	0.0245618	0.040688
Emr	Urban	Electricity	2019	0.00418877	0.0156906	0.0525844
Eur	Urban	Electricity	2019	0.0649388	0.124392	0.289595
Sear	Urban	Electricity	2019	0.0150173	0.0281997	0.083898
Wpr	Urban	Electricity	2019	0.0452193	0.223861	0.523974
Afr	Urban	Electricity	2020	0.104916	0.123501	0.150791
Amr	Urban	Electricity	2020	0.0162068	0.025436	0.0426753
Emr	Urban	Electricity	2020	0.00480263	0.0178445	0.0577203
Eur	Urban	Electricity	2020	0.0650055	0.123163	0.292212
Sear	Urban	Electricity	2020	0.0152912	0.0300495	0.0945737
Wpr	Urban	Electricity	2020	0.0417306	0.246542	0.564423
Afr	Urban	Electricity	2021	0.10314	0.12241	0.151266
Amr	Urban	Electricity	2021	0.0169992	0.0262891	0.0432067
Emr	Urban	Electricity	2021	0.00518919	0.0191223	0.0720696
Eur	Urban	Electricity	2021	0.064075	0.124918	0.314683
Sear	Urban	Electricity	2021	0.0174528	0.0332122	0.105956
Wpr	Urban	Electricity	2021	0.0307461	0.252717	0.610156
Afr	Urban	Electricity	2022	0.101802	0.122126	0.151548
Amr	Urban	Electricity	2022	0.0167508	0.0272676	0.0478331
Emr	Urban	Electricity	2022	0.00498421	0.0209082	0.0802457
Eur	Urban	Electricity	2022	0.0645468	0.124248	0.321703
Sear	Urban	Electricity	2022	0.0171339	0.033598	0.123135
Wpr	Urban	Electricity	2022	0.0289083	0.279418	0.637951
Afr	Urban	Electricity	2023	0.0988394	0.121695	0.15486
Amr	Urban	Electricity	2023	0.0175678	0.0279463	0.0479504
Emr	Urban	Electricity	2023	0.00560717	0.0225677	0.0892982
Eur	Urban	Electricity	2023	0.0625726	0.124035	0.330065
Sear	Urban	Electricity	2023	0.0178124	0.0366016	0.14807
Wpr	Urban	Electricity	2023	0.0296288	0.295802	0.658484
Afr	Urban	Electricity	2024	0.0963193	0.120714	0.157421
Amr	Urban	Electricity	2024	0.0177669	0.0285642	0.0525031
Emr	Urban	Electricity	2024	0.0062733	0.0250887	0.0972845
Eur	Urban	Electricity	2024	0.0636373	0.127466	0.332124
Sear	Urban	Electricity	2024	0.0178307	0.0389421	0.181825
Wpr	Urban	Electricity	2024	0.0347392	0.312229	0.712073
Afr	Urban	Electricity	2025	0.0940024	0.120812	0.158504
Amr	Urban	Electricity	2025	0.0179002	0.0304418	0.05444
Emr	Urban	Electricity	2025	0.00632799	0.0283328	0.10627
Eur	Urban	Electricity	2025	0.0607822	0.127811	0.359514
Sear	Urban	Electricity	2025	0.0177636	0.0420975	0.204157
Wpr	Urban	Electricity	2025	0.03349	0.320339	0.732218
Afr	Urban	Electricity	2026	0.092619	0.120716	0.157922
Amr	Urban	Electricity	2026	0.0170649	0.030421	0.0582335
Emr	Urban	Electricity	2026	0.0062772	0.0309596	0.120457
Eur	Urban	Electricity	2026	0.0614898	0.130854	0.36676
Sear	Urban	Electricity	2026	0.0186746	0.0433389	0.24797
Wpr	Urban	Electricity	2026	0.0318532	0.337097	0.745065
Afr	Urban	Electricity	2027	0.0883956	0.121098	0.163019
Amr	Urban	Electricity	2027	0.0184321	0.0320139	0.0608897
Emr	Urban	Electricity	2027	0.00736933	0.0330607	0.135554
Eur	Urban	Electricity	2027	0.0574122	0.1297	0.374307
Sear	Urban	Electricity	2027	0.0180212	0.0451924	0.276287
Wpr	Urban	Electricity	2027	0.0244785	0.357314	0.761858
Afr	Urban	Electricity	2028	0.086122	0.120491	0.161566
Amr	Urban	Electricity	2028	0.0181862	0.0333694	0.0655525
Emr	Urban	Electricity	2028	0.00701406	0.036525	0.144578
Eur	Urban	Electricity	2028	0.0602186	0.127503	0.3745
Sear	Urban	Electricity	2028	0.0181301	0.0489729	0.328969
Wpr	Urban	Electricity	2028	0.0238941	0.360169	0.797806
Afr	Urban	Electricity	2029	0.0838106	0.120527	0.166148
Amr	Urban	Electricity	2029	0.018118	0.0344438	0.0706241
Emr	Urban	Electricity	2029	0.00725039	0.0390767	0.152904
Eur	Urban	Electricity	2029	0.0587321	0.131773	0.388403
Sear	Urban	Electricity	2029	0.0188507	0.0513708	0.36391
Wpr	Urban	Electricity	2029	0.0280578	0.370372	0.797209
Afr	Urban	Electricity	2030	0.0827491	0.12207	0.165879
Amr	Urban	Electricity	2030	0.0198838	0.0358341	0.070529
Emr	Urban	Electricity	2030	0.00881583	0.043186	0.166361
Eur	Urban	Electricity	2030	0.0587994	0.13212	0.391959
Sear	Urban	Electricity	2030	0.0186107	0.0530903	0.399075
Wpr	Urban	Electricity	2030	0.0235891	0.384449	0.816487
Afr	Rural	Biomass	1990	0.73791	0.83582	0.884677
Amr	Rural	Biomass	1990	0.557028	0.652848	0.736529
Emr	Rural	Biomass	1990	0.43876	0.540827	0.620693
Eur	Rural	Biomass	1990	0.144781	0.209568	0.31667
Sear	Rural	Biomass	1990	0.842817	0.890347	0.92556
Wpr	Rural	Biomass	1990	0.12755	0.341016	0.687716
Afr	Rural	Biomass	1991	0.758871	0.841049	0.887455
Amr	Rural	Biomass	1991	0.550604	0.647423	0.732071
Emr	Rural	Biomass	1991	0.453497	0.54241	0.616798
Eur	Rural	Biomass	1991	0.14731	0.209013	0.31196
Sear	Rural	Biomass	1991	0.842008	0.888898	0.922941
Wpr	Rural	Biomass	1991	0.139473	0.348336	0.688501
Afr	Rural	Biomass	1992	0.770055	0.846154	0.889272
Amr	Rural	Biomass	1992	0.552306	0.640206	0.71616
Emr	Rural	Biomass	1992	0.46782	0.544354	0.614513
Eur	Rural	Biomass	1992	0.148708	0.206314	0.307492
Sear	Rural	Biomass	1992	0.838705	0.885725	0.921406
Wpr	Rural	Biomass	1992	0.155403	0.356169	0.665144
Afr	Rural	Biomass	1993	0.77751	0.852062	0.892052
Amr	Rural	Biomass	1993	0.551706	0.629442	0.711001
Emr	Rural	Biomass	1993	0.480258	0.549647	0.6083
Eur	Rural	Biomass	1993	0.151736	0.203998	0.298062
Sear	Rural	Biomass	1993	0.837366	0.882174	0.915227
Wpr	Rural	Biomass	1993	0.164571	0.359966	0.636763
Afr	Rural	Biomass	1994	0.787068	0.854923	0.894141
Amr	Rural	Biomass	1994	0.544273	0.623631	0.69784
Emr	Rural	Biomass	1994	0.489232	0.552174	0.607842
Eur	Rural	Biomass	1994	0.148396	0.202328	0.293572
Sear	Rural	Biomass	1994	0.829205	0.879003	0.914547
Wpr	Rural	Biomass	1994	0.178803	0.369462	0.609622
Afr	Rural	Biomass	1995	0.798045	0.858391	0.893555
Amr	Rural	Biomass	1995	0.535077	0.612793	0.684693
Emr	Rural	Biomass	1995	0.495303	0.553018	0.604809
Eur	Rural	Biomass	1995	0.151656	0.199896	0.292075
Sear	Rural	Biomass	1995	0.829972	0.874464	0.909085
Wpr	Rural	Biomass	1995	0.198789	0.373856	0.602371
Afr	Rural	Biomass	1996	0.804186	0.862453	0.895062
Amr	Rural	Biomass	1996	0.529818	0.602948	0.676577
Emr	Rural	Biomass	1996	0.499587	0.556227	0.601556
Eur	Rural	Biomass	1996	0.148507	0.198018	0.273725
Sear	Rural	Biomass	1996	0.818851	0.870535	0.906629
Wpr	Rural	Biomass	1996	0.215772	0.383364	0.581154
Afr	Rural	Biomass	1997	0.813772	0.865454	0.896204
Amr	Rural	Biomass	1997	0.520975	0.593203	0.666963
Emr	Rural	Biomass	1997	0.506857	0.5565	0.600384
Eur	Rural	Biomass	1997	0.149771	0.195123	0.274193
Sear	Rural	Biomass	1997	0.819638	0.866491	0.902552
Wpr	Rural	Biomass	1997	0.218047	0.385794	0.577945
Afr	Rural	Biomass	1998	0.822015	0.86714	0.897998
Amr	Rural	Biomass	1998	0.510708	0.584032	0.661054
Emr	Rural	Biomass	1998	0.509285	0.556686	0.59593
Eur	Rural	Biomass	1998	0.145627	0.192313	0.26867
Sear	Rural	Biomass	1998	0.813693	0.864035	0.898958
Wpr	Rural	Biomass	1998	0.232865	0.393371	0.566162
Afr	Rural	Biomass	1999	0.828691	0.87012	0.895702
Amr	Rural	Biomass	1999	0.507181	0.575605	0.648306
Emr	Rural	Biomass	1999	0.507249	0.557387	0.592689
Eur	Rural	Biomass	1999	0.148044	0.188818	0.261794
Sear	Rural	Biomass	1999	0.808365	0.859241	0.897555
Wpr	Rural	Biomass	1999	0.25284	0.40403	0.57315
Afr	Rural	Biomass	2000	0.835335	0.87095	0.895809
Amr	Rural	Biomass	2000	0.496828	0.563637	0.639612
Emr	Rural	Biomass	2000	0.512834	0.555745	0.591905
Eur	Rural	Biomass	2000	0.144879	0.185833	0.250804
Sear	Rural	Biomass	2000	0.806919	0.856172	0.897782
Wpr	Rural	Biomass	2000	0.254797	0.410741	0.563964
Afr	Rural	Biomass	2001	0.839897	0.871777	0.895098
Amr	Rural	Biomass	2001	0.490807	0.555518	0.625723
Emr	Rural	Biomass	2001	0.517385	0.555452	0.589041
Eur	Rural	Biomass	2001	0.144936	0.181166	0.25267
Sear	Rural	Biomass	2001	0.801367	0.853586	0.893125
Wpr	Rural	Biomass	2001	0.27236	0.424326	0.571304
Afr	Rural	Biomass	2002	0.841942	0.872778	0.895075
Amr	Rural	Biomass	2002	0.47599	0.541992	0.613122
Emr	Rural	Biomass	2002	0.512491	0.554916	0.588115
Eur	Rural	Biomass	2002	0.142672	0.176569	0.240877
Sear	Rural	Biomass	2002	0.795752	0.85201	0.892655
Wpr	Rural	Biomass	2002	0.281083	0.433429	0.586799
Afr	Rural	Biomass	2003	0.846383	0.873174	0.89425
Amr	Rural	Biomass	2003	0.462195	0.5327	0.60222
Emr	Rural	Biomass	2003	0.510611	0.553614	0.587204
Eur	Rural	Biomass	2003	0.141271	0.174823	0.24396
Sear	Rural	Biomass	2003	0.794804	0.848539	0.890451
Wpr	Rural	Biomass	2003	0.289395	0.441293	0.601553
Afr	Rural	Biomass	2004	0.847296	0.873075	0.8926
Amr	Rural	Biomass	2004	0.460941	0.522783	0.587589
Emr	Rural	Biomass	2004	0.510614	0.552054	0.586269
Eur	Rural	Biomass	2004	0.135495	0.173787	0.240663
Sear	Rural	Biomass	2004	0.794142	0.84604	0.88679
Wpr	Rural	Biomass	2004	0.311739	0.453541	0.60436
Afr	Rural	Biomass	2005	0.847468	0.872954	0.893032
Amr	Rural	Biomass	2005	0.450243	0.512333	0.575175
Emr	Rural	Biomass	2005	0.509807	0.549991	0.580458
Eur	Rural	Biomass	2005	0.133127	0.168862	0.242881
Sear	Rural	Biomass	2005	0.791429	0.84379	0.880345
Wpr	Rural	Biomass	2005	0.320897	0.471611	0.611802
Afr	Rural	Biomass	2006	0.846631	0.87298	0.891778
Amr	Rural	Biomass	2006	0.444108	0.499554	0.563397
Emr	Rural	Biomass	2006	0.502486	0.545263	0.578147
Eur	Rural	Biomass	2006	0.133076	0.168611	0.240254
Sear	Rural	Biomass	2006	0.781324	0.83928	0.883228
Wpr	Rural	Biomass	2006	0.334513	0.487672	0.643814
Afr	Rural	Biomass	2007	0.845849	0.871396	0.890732
Amr	Rural	Biomass	2007	0.435506	0.493477	0.554526
Emr	Rural	Biomass	2007	0.497564	0.540525	0.574643
Eur	Rural	Biomass	2007	0.128543	0.167625	0.239889
Sear	Rural	Biomass	2007	0.777784	0.833094	0.87361
Wpr	Rural	Biomass	2007	0.336185	0.499396	0.643072
Afr	Rural	Biomass	2008	0.845055	0.871436	0.890309
Amr	Rural	Biomass	2008	0.432221	0.481712	0.536823
Emr	Rural	Biomass	2008	0.493189	0.535758	0.572217
Eur	Rural	Biomass	2008	0.128306	0.168795	0.252887
Sear	Rural	Biomass	2008	0.772059	0.82765	0.873002
Wpr	Rural	Biomass	2008	0.338491	0.517642	0.66172
Afr	Rural	Biomass	2009	0.845857	0.871034	0.890192
Amr	Rural	Biomass	2009	0.421255	0.473752	0.529855
Emr	Rural	Biomass	2009	0.476329	0.528191	0.567474
Eur	Rural	Biomass	2009	0.128826	0.169119	0.259075
Sear	Rural	Biomass	2009	0.765975	0.821473	0.867442
Wpr	Rural	Biomass	2009	0.34822	0.529222	0.675346
Afr	Rural	Biomass	2010	0.842037	0.869242	0.886828
Amr	Rural	Biomass	2010	0.412376	0.462221	0.527342
Emr	Rural	Biomass	2010	0.476193	0.521717	0.557925
Eur	Rural	Biomass	2010	0.126502	0.171459	0.267774
Sear	Rural	Biomass	2010	0.751725	0.811809	0.860184
Wpr	Rural	Biomass	2010	0.37023	0.536649	0.694479
Afr	Rural	Biomass	2011	0.843105	0.868511	0.886826
Amr	Rural	Biomass	2011	0.410388	0.454091	0.508321
Emr	Rural	Biomass	2011	0.456861	0.512911	0.554774
Eur	Rural	Biomass	2011	0.123778	0.173188	0.263658
Sear	Rural	Biomass	2011	0.73767	0.800972	0.851994
Wpr	Rural	Biomass	2011	0.363434	0.540496	0.704788
Afr	Rural	Biomass	2012	0.841964	0.86721	0.887298
Amr	Rural	Biomass	2012	0.394555	0.443105	0.494121
Emr	Rural	Biomass	2012	0.451628	0.504952	0.54667
Eur	Rural	Biomass	2012	0.124726	0.175134	0.304775
Sear	Rural	Biomass	2012	0.727864	0.789548	0.842142
Wpr	Rural	Biomass	2012	0.358977	0.55337	0.715358
Afr	Rural	Biomass	2013	0.837025	0.867167	0.885301
Amr	Rural	Biomass	2013	0.384598	0.433053	0.48869
Emr	Rural	Biomass	2013	0.443201	0.497477	0.538687
Eur	Rural	Biomass	2013	0.124214	0.176811	0.316474
Sear	Rural	Biomass	2013	0.711241	0.773722	0.831636
Wpr	Rural	Biomass	2013	0.354609	0.552855	0.72492
Afr	Rural	Biomass	2014	0.837569	0.864812	0.885251
Amr	Rural	Biomass	2014	0.379602	0.422933	0.477476
Emr	Rural	Biomass	2014	0.427787	0.48548	0.535088
Eur	Rural	Biomass	2014	0.121707	0.181751	0.312097
Sear	Rural	Biomass	2014	0.687648	0.756623	0.818574
Wpr	Rural	Biomass	2014	0.342255	0.551705	0.742942
Afr	Rural	Biomass	2015	0.836187	0.863371	0.883115
Amr	Rural	Biomass	2015	0.365497	0.411609	0.465851
Emr	Rural	Biomass	2015	0.422103	0.477981	0.525479
Eur	Rural	Biomass	2015	0.120608	0.187775	0.332615
Sear	Rural	Biomass	2015	0.659967	0.735624	0.806336
Wpr	Rural	Biomass	2015	0.316907	0.549307	0.750293
Afr	Rural	Biomass	2016	0.832477	0.861477	0.883636
Amr	Rural	Biomass	2016	0.35347	0.398599	0.457666
Emr	Rural	Biomass	2016	0.400878	0.464989	0.519153
Eur	Rural	Biomass	2016	0.117905	0.188346	0.345654
Sear	Rural	Biomass	2016	0.628061	0.71412	0.795084
Wpr	Rural	Biomass	2016	0.298698	0.54891	0.757248
Afr	Rural	Biomass	2017	0.829425	0.859568	0.883127
Amr	Rural	Biomass	2017	0.339292	0.386416	0.445858
Emr	Rural	Biomass	2017	0.393151	0.453678	0.511008
Eur	Rural	Biomass	2017	0.121147	0.195	0.355386
Sear	Rural	Biomass	2017	0.593359	0.694489	0.789921
Wpr	Rural	Biomass	2017	0.274239	0.542601	0.761464
Afr	Rural	Biomass	2018	0.822999	0.856984	0.879287
Amr	Rural	Biomass	2018	0.326594	0.378774	0.437576
Emr	Rural	Biomass	2018	0.370421	0.442175	0.502657
Eur	Rural	Biomass	2018	0.123957	0.200818	0.379105
Sear	Rural	Biomass	2018	0.549224	0.668722	0.784346
Wpr	Rural	Biomass	2018	0.255926	0.537269	0.780864
Afr	Rural	Biomass	2019	0.814257	0.853595	0.879797
Amr	Rural	Biomass	2019	0.314791	0.367613	0.43206
Emr	Rural	Biomass	2019	0.354375	0.428178	0.495866
Eur	Rural	Biomass	2019	0.11827	0.204384	0.387519
Sear	Rural	Biomass	2019	0.500119	0.645382	0.774158
Wpr	Rural	Biomass	2019	0.22014	0.529512	0.782604
Afr	Rural	Biomass	2020	0.811199	0.849891	0.879003
Amr	Rural	Biomass	2020	0.305784	0.35715	0.421161
Emr	Rural	Biomass	2020	0.328598	0.41448	0.490979
Eur	Rural	Biomass	2020	0.12071	0.208756	0.403899
Sear	Rural	Biomass	2020	0.44592	0.615874	0.762396
Wpr	Rural	Biomass	2020	0.19831	0.522223	0.8055
Afr	Rural	Biomass	2021	0.800951	0.845372	0.874231
Amr	Rural	Biomass	2021	0.291563	0.347445	0.420273
Emr	Rural	Biomass	2021	0.30711	0.398764	0.480795
Eur	Rural	Biomass	2021	0.118676	0.213104	0.408123
Sear	Rural	Biomass	2021	0.416559	0.59347	0.759133
Wpr	Rural	Biomass	2021	0.185922	0.516089	0.80783
Afr	Rural	Biomass	2022	0.79237	0.839331	0.872405
Amr	Rural	Biomass	2022	0.276105	0.33752	0.411189
Emr	Rural	Biomass	2022	0.280353	0.383806	0.471309
Eur	Rural	Biomass	2022	0.117781	0.217432	0.421249
Sear	Rural	Biomass	2022	0.365249	0.563733	0.746956
Wpr	Rural	Biomass	2022	0.174047	0.510888	0.816025
Afr	Rural	Biomass	2023	0.783261	0.831186	0.86638
Amr	Rural	Biomass	2023	0.261977	0.328047	0.412374
Emr	Rural	Biomass	2023	0.262894	0.369304	0.470413
Eur	Rural	Biomass	2023	0.118404	0.223369	0.436251
Sear	Rural	Biomass	2023	0.310055	0.539088	0.742835
Wpr	Rural	Biomass	2023	0.161005	0.491186	0.815344
Afr	Rural	Biomass	2024	0.768658	0.825497	0.863892
Amr	Rural	Biomass	2024	0.251648	0.31961	0.411259
Emr	Rural	Biomass	2024	0.234758	0.354669	0.458966
Eur	Rural	Biomass	2024	0.116231	0.228135	0.44255
Sear	Rural	Biomass	2024	0.288882	0.513721	0.742903
Wpr	Rural	Biomass	2024	0.144362	0.492879	0.820134
Afr	Rural	Biomass	2025	0.754814	0.816317	0.861833
Amr	Rural	Biomass	2025	0.239803	0.312193	0.40069
Emr	Rural	Biomass	2025	0.204493	0.337474	0.450739
Eur	Rural	Biomass	2025	0.111337	0.236026	0.464696
Sear	Rural	Biomass	2025	0.241377	0.481824	0.732441
Wpr	Rural	Biomass	2025	0.130573	0.464658	0.824342
Afr	Rural	Biomass	2026	0.741419	0.809494	0.853309
Amr	Rural	Biomass	2026	0.230973	0.305815	0.401284
Emr	Rural	Biomass	2026	0.194636	0.319418	0.439824
Eur	Rural	Biomass	2026	0.114064	0.238756	0.455953
Sear	Rural	Biomass	2026	0.221436	0.457057	0.733826
Wpr	Rural	Biomass	2026	0.119584	0.452317	0.823634
Afr	Rural	Biomass	2027	0.723819	0.797613	0.851685
Amr	Rural	Biomass	2027	0.221848	0.302495	0.395526
Emr	Rural	Biomass	2027	0.163979	0.307459	0.435451
Eur	Rural	Biomass	2027	0.113485	0.245524	0.465769
Sear	Rural	Biomass	2027	0.191388	0.430558	0.729636
Wpr	Rural	Biomass	2027	0.119284	0.446935	0.817247
Afr	Rural	Biomass	2028	0.710013	0.789431	0.846804
Amr	Rural	Biomass	2028	0.213754	0.29298	0.396108
Emr	Rural	Biomass	2028	0.149492	0.289932	0.418454
Eur	Rural	Biomass	2028	0.109251	0.245557	0.469554
Sear	Rural	Biomass	2028	0.164132	0.405227	0.727126
Wpr	Rural	Biomass	2028	0.112311	0.436569	0.828725
Afr	Rural	Biomass	2029	0.693093	0.77962	0.839775
Amr	Rural	Biomass	2029	0.199859	0.28477	0.387693
Emr	Rural	Biomass	2029	0.131175	0.273735	0.42221
Eur	Rural	Biomass	2029	0.111744	0.247248	0.484418
Sear	Rural	Biomass	2029	0.143594	0.379856	0.7147
Wpr	Rural	Biomass	2029	0.104848	0.433911	0.818577
Afr	Rural	Biomass	2030	0.668709	0.769078	0.835316
Amr	Rural	Biomass	2030	0.196682	0.278387	0.396301
Emr	Rural	Biomass	2030	0.113343	0.256297	0.402719
Eur	Rural	Biomass	2030	0.111222	0.254327	0.493811
Sear	Rural	Biomass	2030	0.132981	0.35631	0.713123
Wpr	Rural	Biomass	2030	0.101124	0.413427	0.828677
Afr	Rural	Charcoal	1990	0.0214898	0.044573	0.0909326
Amr	Rural	Charcoal	1990	0.00354638	0.014844	0.0481199
Emr	Rural	Charcoal	1990	0.00164915	0.0109684	0.0377663
Eur	Rural	Charcoal	1990	0.00117826	0.00575456	0.0226951
Sear	Rural	Charcoal	1990	0.0118655	0.0216797	0.0411848
Wpr	Rural	Charcoal	1990	0.000799413	0.0033795	0.0141821
Afr	Rural	Charcoal	1991	0.0212857	0.0440154	0.0884709
Amr	Rural	Charcoal	1991	0.00381749	0.0155634	0.0438889
Emr	Rural	Charcoal	1991	0.00167957	0.0100908	0.0340847
Eur	Rural	Charcoal	1991	0.00117527	0.00550525	0.0218551
Sear	Rural	Charcoal	1991	0.0109622	0.0204726	0.0396928
Wpr	Rural	Charcoal	1991	0.000992535	0.00364624	0.0134933
Afr	Rural	Charcoal	1992	0.0218435	0.0434629	0.0875436
Amr	Rural	Charcoal	1992	0.00419267	0.0148281	0.0427018
Emr	Rural	Charcoal	1992	0.0014878	0.00916918	0.0300485
Eur	Rural	Charcoal	1992	0.00125229	0.00514433	0.0172208
Sear	Rural	Charcoal	1992	0.0113515	0.0197472	0.037065
Wpr	Rural	Charcoal	1992	0.00105126	0.00409769	0.0163569
Afr	Rural	Charcoal	1993	0.0216333	0.0429856	0.0860059
Amr	Rural	Charcoal	1993	0.00477515	0.0145325	0.0405537
Emr	Rural	Charcoal	1993	0.00158473	0.00855451	0.0309566
Eur	Rural	Charcoal	1993	0.00118758	0.00480034	0.0162135
Sear	Rural	Charcoal	1993	0.010186	0.0189211	0.0375962
Wpr	Rural	Charcoal	1993	0.00106548	0.00456524	0.0130159
Afr	Rural	Charcoal	1994	0.0225109	0.0431897	0.082214
Amr	Rural	Charcoal	1994	0.00475949	0.013923	0.039374
Emr	Rural	Charcoal	1994	0.00164145	0.0080628	0.0253492
Eur	Rural	Charcoal	1994	0.000963161	0.00440508	0.0151612
Sear	Rural	Charcoal	1994	0.00976258	0.0179901	0.0331735
Wpr	Rural	Charcoal	1994	0.00128323	0.00468561	0.01366
Afr	Rural	Charcoal	1995	0.0222614	0.0413843	0.0819456
Amr	Rural	Charcoal	1995	0.00546509	0.0141353	0.039947
Emr	Rural	Charcoal	1995	0.00147655	0.00766284	0.0234476
Eur	Rural	Charcoal	1995	0.000977645	0.00407502	0.0125593
Sear	Rural	Charcoal	1995	0.00891683	0.0174745	0.0308132
Wpr	Rural	Charcoal	1995	0.00143305	0.00523726	0.0135265
Afr	Rural	Charcoal	1996	0.0242116	0.0413409	0.0774337
Amr	Rural	Charcoal	1996	0.00621596	0.0144925	0.0397428
Emr	Rural	Charcoal	1996	0.00147345	0.00725661	0.0235118
Eur	Rural	Charcoal	1996	0.00108311	0.00389051	0.012652
Sear	Rural	Charcoal	1996	0.00892297	0.0170127	0.0296454
Wpr	Rural	Charcoal	1996	0.00148018	0.0056902	0.0156588
Afr	Rural	Charcoal	1997	0.024385	0.0414481	0.0747133
Amr	Rural	Charcoal	1997	0.00661339	0.0149756	0.0392437
Emr	Rural	Charcoal	1997	0.00163121	0.00677556	0.0226451
Eur	Rural	Charcoal	1997	0.00100207	0.00371829	0.011566
Sear	Rural	Charcoal	1997	0.00855878	0.0161404	0.0275639
Wpr	Rural	Charcoal	1997	0.00155062	0.00599594	0.0150394
Afr	Rural	Charcoal	1998	0.0249012	0.0405712	0.0714746
Amr	Rural	Charcoal	1998	0.00658417	0.0151577	0.0381358
Emr	Rural	Charcoal	1998	0.00170144	0.00698165	0.0236348
Eur	Rural	Charcoal	1998	0.00100745	0.00369029	0.0102644
Sear	Rural	Charcoal	1998	0.00841731	0.0157185	0.0265936
Wpr	Rural	Charcoal	1998	0.00174662	0.00608951	0.0164455
Afr	Rural	Charcoal	1999	0.026012	0.0406607	0.0680865
Amr	Rural	Charcoal	1999	0.00752563	0.0154992	0.0373939
Emr	Rural	Charcoal	1999	0.00182913	0.00679866	0.0220966
Eur	Rural	Charcoal	1999	0.00108343	0.00348269	0.0101453
Sear	Rural	Charcoal	1999	0.00814611	0.0151459	0.0258791
Wpr	Rural	Charcoal	1999	0.00194735	0.00613465	0.016284
Afr	Rural	Charcoal	2000	0.026788	0.04115	0.0670939
Amr	Rural	Charcoal	2000	0.0081539	0.0160411	0.0401749
Emr	Rural	Charcoal	2000	0.00172164	0.00662673	0.0207024
Eur	Rural	Charcoal	2000	0.00102929	0.00340766	0.00939843
Sear	Rural	Charcoal	2000	0.00802857	0.0145768	0.0244662
Wpr	Rural	Charcoal	2000	0.00225914	0.00657315	0.0172143
Afr	Rural	Charcoal	2001	0.0270376	0.0408662	0.0642304
Amr	Rural	Charcoal	2001	0.00842018	0.0167473	0.0425065
Emr	Rural	Charcoal	2001	0.00217268	0.00696689	0.0203486
Eur	Rural	Charcoal	2001	0.00101477	0.00317452	0.00846981
Sear	Rural	Charcoal	2001	0.00793378	0.0141462	0.0243763
Wpr	Rural	Charcoal	2001	0.00238949	0.00656529	0.0169945
Afr	Rural	Charcoal	2002	0.0286049	0.0420514	0.063167
Amr	Rural	Charcoal	2002	0.00904393	0.017976	0.0472133
Emr	Rural	Charcoal	2002	0.00230478	0.0072167	0.0212041
Eur	Rural	Charcoal	2002	0.00109666	0.00307402	0.00770488
Sear	Rural	Charcoal	2002	0.00743239	0.0135584	0.022402
Wpr	Rural	Charcoal	2002	0.00257621	0.00689088	0.01745
Afr	Rural	Charcoal	2003	0.0297695	0.0417822	0.06164
Amr	Rural	Charcoal	2003	0.00876499	0.0181683	0.0449381
Emr	Rural	Charcoal	2003	0.00234119	0.00755801	0.0221091
Eur	Rural	Charcoal	2003	0.00122797	0.00305959	0.00789977
Sear	Rural	Charcoal	2003	0.00734916	0.0134908	0.0220752
Wpr	Rural	Charcoal	2003	0.00288421	0.00732327	0.0204485
Afr	Rural	Charcoal	2004	0.0304029	0.0428494	0.060781
Amr	Rural	Charcoal	2004	0.00921356	0.0190529	0.049499
Emr	Rural	Charcoal	2004	0.00276252	0.0084857	0.0267827
Eur	Rural	Charcoal	2004	0.00116381	0.0029492	0.00734145
Sear	Rural	Charcoal	2004	0.0076653	0.0131994	0.0214705
Wpr	Rural	Charcoal	2004	0.00333956	0.00781696	0.0169395
Afr	Rural	Charcoal	2005	0.0321234	0.043082	0.0588171
Amr	Rural	Charcoal	2005	0.00995002	0.0209697	0.0508401
Emr	Rural	Charcoal	2005	0.00354078	0.00893436	0.0270566
Eur	Rural	Charcoal	2005	0.00101928	0.00275607	0.00630224
Sear	Rural	Charcoal	2005	0.00691267	0.0127847	0.0203164
Wpr	Rural	Charcoal	2005	0.00365505	0.00804855	0.0172431
Afr	Rural	Charcoal	2006	0.032319	0.0437533	0.0625059
Amr	Rural	Charcoal	2006	0.0101116	0.0210741	0.0482133
Emr	Rural	Charcoal	2006	0.00352932	0.0104671	0.0305213
Eur	Rural	Charcoal	2006	0.00113988	0.00255294	0.00595954
Sear	Rural	Charcoal	2006	0.00741621	0.0124944	0.0201242
Wpr	Rural	Charcoal	2006	0.00396846	0.00849288	0.0181064
Afr	Rural	Charcoal	2007	0.0338186	0.0449404	0.0625133
Amr	Rural	Charcoal	2007	0.0109911	0.0219602	0.054108
Emr	Rural	Charcoal	2007	0.00455229	0.0121287	0.0345221
Eur	Rural	Charcoal	2007	0.000956078	0.0023343	0.00636672
Sear	Rural	Charcoal	2007	0.00691331	0.0120353	0.0198641
Wpr	Rural	Charcoal	2007	0.00455869	0.00927016	0.0180025
Afr	Rural	Charcoal	2008	0.0347097	0.0462929	0.0623742
Amr	Rural	Charcoal	2008	0.0112781	0.0233553	0.0502576
Emr	Rural	Charcoal	2008	0.00503884	0.0133928	0.0336514
Eur	Rural	Charcoal	2008	0.000802772	0.00208665	0.00511123
Sear	Rural	Charcoal	2008	0.00694261	0.0120089	0.0191475
Wpr	Rural	Charcoal	2008	0.00480895	0.00968049	0.0183046
Afr	Rural	Charcoal	2009	0.0355317	0.0470052	0.064866
Amr	Rural	Charcoal	2009	0.0116236	0.0236626	0.0510984
Emr	Rural	Charcoal	2009	0.00635077	0.0161834	0.0426671
Eur	Rural	Charcoal	2009	0.000715745	0.00184231	0.00534678
Sear	Rural	Charcoal	2009	0.00665308	0.0114481	0.0189112
Wpr	Rural	Charcoal	2009	0.00549025	0.0103552	0.0174551
Afr	Rural	Charcoal	2010	0.03711	0.0486026	0.0671176
Amr	Rural	Charcoal	2010	0.012272	0.0245172	0.051112
Emr	Rural	Charcoal	2010	0.00755379	0.0180648	0.0442299
Eur	Rural	Charcoal	2010	0.000615602	0.00177542	0.00521826
Sear	Rural	Charcoal	2010	0.00596416	0.0111585	0.0179986
Wpr	Rural	Charcoal	2010	0.0050368	0.0110435	0.0195263
Afr	Rural	Charcoal	2011	0.0386161	0.0502017	0.0680444
Amr	Rural	Charcoal	2011	0.012408	0.0254662	0.0504975
Emr	Rural	Charcoal	2011	0.00877382	0.020282	0.0460689
Eur	Rural	Charcoal	2011	0.000534612	0.00152993	0.00521481
Sear	Rural	Charcoal	2011	0.00625249	0.0108387	0.0184227
Wpr	Rural	Charcoal	2011	0.00598734	0.0111323	0.0195321
Afr	Rural	Charcoal	2012	0.0392045	0.0511472	0.0700934
Amr	Rural	Charcoal	2012	0.0137458	0.0264604	0.0544583
Emr	Rural	Charcoal	2012	0.00941701	0.0225611	0.0498628
Eur	Rural	Charcoal	2012	0.000494801	0.00140657	0.00513112
Sear	Rural	Charcoal	2012	0.00592749	0.0102432	0.0173312
Wpr	Rural	Charcoal	2012	0.00636954	0.0114299	0.018627
Afr	Rural	Charcoal	2013	0.0399645	0.0530399	0.0727287
Amr	Rural	Charcoal	2013	0.0133174	0.0269202	0.0520441
Emr	Rural	Charcoal	2013	0.0105754	0.0251844	0.0531441
Eur	Rural	Charcoal	2013	0.000414298	0.00135528	0.00530685
Sear	Rural	Charcoal	2013	0.00529486	0.00963857	0.0165383
Wpr	Rural	Charcoal	2013	0.00598751	0.0116752	0.0206588
Afr	Rural	Charcoal	2014	0.0412784	0.0552533	0.0750245
Amr	Rural	Charcoal	2014	0.0136339	0.0271735	0.0527571
Emr	Rural	Charcoal	2014	0.0125291	0.0282865	0.0561192
Eur	Rural	Charcoal	2014	0.000376193	0.00127084	0.00574109
Sear	Rural	Charcoal	2014	0.0051647	0.00923964	0.0165717
Wpr	Rural	Charcoal	2014	0.00616304	0.0117821	0.0204606
Afr	Rural	Charcoal	2015	0.0432355	0.0573696	0.0781843
Amr	Rural	Charcoal	2015	0.0132921	0.0277752	0.0569622
Emr	Rural	Charcoal	2015	0.0133546	0.0303436	0.0603702
Eur	Rural	Charcoal	2015	0.000295302	0.00125074	0.00576297
Sear	Rural	Charcoal	2015	0.00484194	0.00894132	0.0172011
Wpr	Rural	Charcoal	2015	0.00638397	0.0118298	0.0203324
Afr	Rural	Charcoal	2016	0.0439319	0.0597475	0.0827174
Amr	Rural	Charcoal	2016	0.0126571	0.0279312	0.0577306
Emr	Rural	Charcoal	2016	0.0147978	0.0339954	0.0685108
Eur	Rural	Charcoal	2016	0.000297014	0.00119748	0.00651749
Sear	Rural	Charcoal	2016	0.00412686	0.00852599	0.0170383
Wpr	Rural	Charcoal	2016	0.0062351	0.0117924	0.0207992
Afr	Rural	Charcoal	2017	0.0467405	0.062221	0.0841227
Amr	Rural	Charcoal	2017	0.0135113	0.0285752	0.0582738
Emr	Rural	Charcoal	2017	0.017671	0.0373852	0.0709083
Eur	Rural	Charcoal	2017	0.000248768	0.00119401	0.00625445
Sear	Rural	Charcoal	2017	0.00385943	0.00810833	0.0174137
Wpr	Rural	Charcoal	2017	0.00586814	0.0117821	0.0202056
Afr	Rural	Charcoal	2018	0.0470926	0.064859	0.089781
Amr	Rural	Charcoal	2018	0.014028	0.029414	0.0616581
Emr	Rural	Charcoal	2018	0.016332	0.0393182	0.0745047
Eur	Rural	Charcoal	2018	0.000235766	0.00118103	0.00740642
Sear	Rural	Charcoal	2018	0.00323123	0.00757487	0.0176456
Wpr	Rural	Charcoal	2018	0.00584762	0.0114618	0.0206535
Afr	Rural	Charcoal	2019	0.0498198	0.0696895	0.0981278
Amr	Rural	Charcoal	2019	0.0131185	0.0301778	0.0663999
Emr	Rural	Charcoal	2019	0.0181633	0.0424962	0.0804846
Eur	Rural	Charcoal	2019	0.000224785	0.0011498	0.0093666
Sear	Rural	Charcoal	2019	0.00292016	0.00728798	0.0169135
Wpr	Rural	Charcoal	2019	0.00521063	0.0114499	0.0218295
Afr	Rural	Charcoal	2020	0.0513812	0.0728555	0.101301
Amr	Rural	Charcoal	2020	0.0131109	0.0304489	0.0697302
Emr	Rural	Charcoal	2020	0.0189147	0.0437633	0.0870896
Eur	Rural	Charcoal	2020	0.000236919	0.00125884	0.0110043
Sear	Rural	Charcoal	2020	0.00265004	0.00695118	0.0177124
Wpr	Rural	Charcoal	2020	0.00530604	0.0113584	0.0226389
Afr	Rural	Charcoal	2021	0.0539297	0.0764377	0.110803
Amr	Rural	Charcoal	2021	0.0132316	0.0312768	0.076358
Emr	Rural	Charcoal	2021	0.020658	0.0476884	0.0927607
Eur	Rural	Charcoal	2021	0.000209476	0.00124633	0.0109221
Sear	Rural	Charcoal	2021	0.00239737	0.00664763	0.0201865
Wpr	Rural	Charcoal	2021	0.00514627	0.0114505	0.02286
Afr	Rural	Charcoal	2022	0.0549975	0.0820071	0.122259
Amr	Rural	Charcoal	2022	0.0122807	0.031691	0.0728988
Emr	Rural	Charcoal	2022	0.019395	0.0496028	0.102714
Eur	Rural	Charcoal	2022	0.000220491	0.00132736	0.011983
Sear	Rural	Charcoal	2022	0.00207218	0.00651921	0.0194213
Wpr	Rural	Charcoal	2022	0.00506483	0.0111835	0.0248091
Afr	Rural	Charcoal	2023	0.0589798	0.0868149	0.125741
Amr	Rural	Charcoal	2023	0.0115906	0.0320732	0.0813448
Emr	Rural	Charcoal	2023	0.0203958	0.051163	0.105872
Eur	Rural	Charcoal	2023	0.000167463	0.00134631	0.0139962
Sear	Rural	Charcoal	2023	0.00185845	0.00615895	0.0199213
Wpr	Rural	Charcoal	2023	0.00488656	0.0115062	0.0259473
Afr	Rural	Charcoal	2024	0.0600596	0.0921335	0.135669
Amr	Rural	Charcoal	2024	0.0124661	0.0329215	0.0896532
Emr	Rural	Charcoal	2024	0.0192245	0.0527555	0.113778
Eur	Rural	Charcoal	2024	0.000177058	0.00139769	0.0172542
Sear	Rural	Charcoal	2024	0.00150191	0.00593581	0.0225698
Wpr	Rural	Charcoal	2024	0.00487387	0.011671	0.0272956
Afr	Rural	Charcoal	2025	0.0639503	0.0976368	0.145564
Amr	Rural	Charcoal	2025	0.0125129	0.0333022	0.0877682
Emr	Rural	Charcoal	2025	0.0212315	0.0551615	0.118955
Eur	Rural	Charcoal	2025	0.000162583	0.00140337	0.0220335
Sear	Rural	Charcoal	2025	0.00133246	0.00566845	0.0229297
Wpr	Rural	Charcoal	2025	0.00430589	0.0115637	0.03005
Afr	Rural	Charcoal	2026	0.066753	0.103599	0.156767
Amr	Rural	Charcoal	2026	0.0110493	0.0340252	0.102386
Emr	Rural	Charcoal	2026	0.0206435	0.0555712	0.133432
Eur	Rural	Charcoal	2026	0.000150619	0.00158241	0.0217458
Sear	Rural	Charcoal	2026	0.00117005	0.00558778	0.0240432
Wpr	Rural	Charcoal	2026	0.00483173	0.0114328	0.0305916
Afr	Rural	Charcoal	2027	0.0690456	0.110007	0.16859
Amr	Rural	Charcoal	2027	0.0111928	0.0349673	0.095624
Emr	Rural	Charcoal	2027	0.018946	0.0572634	0.138605
Eur	Rural	Charcoal	2027	0.00016342	0.00159862	0.0280176
Sear	Rural	Charcoal	2027	0.00105213	0.00540404	0.02845
Wpr	Rural	Charcoal	2027	0.00424082	0.0115915	0.031505
Afr	Rural	Charcoal	2028	0.0711481	0.116789	0.178985
Amr	Rural	Charcoal	2028	0.0114484	0.0348935	0.108263
Emr	Rural	Charcoal	2028	0.0210167	0.0582392	0.145061
Eur	Rural	Charcoal	2028	0.000173432	0.00164959	0.029219
Sear	Rural	Charcoal	2028	0.000893497	0.00517068	0.0296977
Wpr	Rural	Charcoal	2028	0.00379014	0.0113377	0.0342718
Afr	Rural	Charcoal	2029	0.072893	0.122308	0.192394
Amr	Rural	Charcoal	2029	0.0116052	0.0360662	0.110638
Emr	Rural	Charcoal	2029	0.0204393	0.0575801	0.146267
Eur	Rural	Charcoal	2029	0.000171824	0.00168773	0.032345
Sear	Rural	Charcoal	2029	0.000756083	0.00510574	0.0316052
Wpr	Rural	Charcoal	2029	0.00396593	0.0117278	0.0353614
Afr	Rural	Charcoal	2030	0.0782922	0.130436	0.206111
Amr	Rural	Charcoal	2030	0.0111664	0.0360958	0.119507
Emr	Rural	Charcoal	2030	0.0206476	0.0573368	0.158486
Eur	Rural	Charcoal	2030	0.000162599	0.00197009	0.0411905
Sear	Rural	Charcoal	2030	0.000755598	0.00501566	0.0335849
Wpr	Rural	Charcoal	2030	0.00384895	0.0118499	0.0354907
Afr	Rural	Coal	1990	0.00126489	0.00530699	0.0256977
Amr	Rural	Coal	1990	0.00170223	0.00840235	0.0168745
Emr	Rural	Coal	1990	4.01573e-05	0.0012114	0.0128543
Eur	Rural	Coal	1990	0.0164618	0.0416149	0.0949612
Sear	Rural	Coal	1990	0.00232452	0.0146412	0.039442
Wpr	Rural	Coal	1990	0.0533561	0.301737	0.653028
Afr	Rural	Coal	1991	0.00114275	0.00502414	0.0204642
Amr	Rural	Coal	1991	0.00135885	0.0080874	0.0157497
Emr	Rural	Coal	1991	3.7212e-05	0.00103751	0.0110853
Eur	Rural	Coal	1991	0.0157664	0.0410797	0.0848518
Sear	Rural	Coal	1991	0.00247146	0.0146299	0.0397436
Wpr	Rural	Coal	1991	0.0656301	0.304367	0.643274
Afr	Rural	Coal	1992	0.00112192	0.00478063	0.0186695
Amr	Rural	Coal	1992	0.00146674	0.00709929	0.0140979
Emr	Rural	Coal	1992	3.43714e-05	0.000953336	0.00999524
Eur	Rural	Coal	1992	0.017787	0.0398364	0.0834261
Sear	Rural	Coal	1992	0.00269033	0.0147846	0.0394956
Wpr	Rural	Coal	1992	0.0799368	0.318073	0.604297
Afr	Rural	Coal	1993	0.0012316	0.00454827	0.0158951
Amr	Rural	Coal	1993	0.00102993	0.00660188	0.0136025
Emr	Rural	Coal	1993	3.81109e-05	0.000939578	0.00804081
Eur	Rural	Coal	1993	0.0163829	0.0392862	0.0782954
Sear	Rural	Coal	1993	0.00254585	0.014085	0.034202
Wpr	Rural	Coal	1993	0.10007	0.323799	0.604293
Afr	Rural	Coal	1994	0.00112933	0.00416143	0.0135251
Amr	Rural	Coal	1994	0.00108711	0.00582039	0.0113966
Emr	Rural	Coal	1994	4.1949e-05	0.000847679	0.00682887
Eur	Rural	Coal	1994	0.0175707	0.0374577	0.0724157
Sear	Rural	Coal	1994	0.00275896	0.0132879	0.0346469
Wpr	Rural	Coal	1994	0.10629	0.325538	0.588602
Afr	Rural	Coal	1995	0.00102249	0.00397334	0.0127619
[truncated: 2,429 more rows]

## Sheet: Fuels (Population)
region	area	fuel	year	population_lower95	population_median	population_upper95
Afr	Urban	Biomass	1990	36716.9	49225.3	64454.6
Amr	Urban	Biomass	1990	10193.4	19830.7	35125.9
Emr	Urban	Biomass	1990	12174.8	21903	34954.2
Eur	Urban	Biomass	1990	3356.41	7677.47	21086.9
Sear	Urban	Biomass	1990	86565.4	118727	152927
Wpr	Urban	Biomass	1990	19788.3	39122.6	125540
Afr	Urban	Biomass	1991	39133.3	51538.9	67173
Amr	Urban	Biomass	1991	10135.2	18895.7	34242.1
Emr	Urban	Biomass	1991	12957.7	22835.6	34849.1
Eur	Urban	Biomass	1991	3210.08	7398.75	19415.5
Sear	Urban	Biomass	1991	90391.7	119527	153175
Wpr	Urban	Biomass	1991	19765.4	39568.5	120094
Afr	Urban	Biomass	1992	41290.9	53845.7	69156.1
Amr	Urban	Biomass	1992	10083.6	18359.6	32172.5
Emr	Urban	Biomass	1992	14559.9	23346.1	35109.3
Eur	Urban	Biomass	1992	3248.15	6962.84	19683.2
Sear	Urban	Biomass	1992	89232.4	118764	150956
Wpr	Urban	Biomass	1992	20437.1	40650.1	118955
Afr	Urban	Biomass	1993	43469.3	55913.8	69932.9
Amr	Urban	Biomass	1993	10244.8	17395.9	31332.9
Emr	Urban	Biomass	1993	15403.3	24070.6	35619.3
Eur	Urban	Biomass	1993	3182.06	6671.03	17024.2
Sear	Urban	Biomass	1993	88298.2	118035	149970
Wpr	Urban	Biomass	1993	20454.9	42288.2	119278
Afr	Urban	Biomass	1994	45664.4	58131.9	71856
Amr	Urban	Biomass	1994	10036	17061.8	29756.1
Emr	Urban	Biomass	1994	16875.7	24370.1	34629.5
Eur	Urban	Biomass	1994	3009.38	6311.51	16459.3
Sear	Urban	Biomass	1994	87906.1	118133	151439
Wpr	Urban	Biomass	1994	21186.1	43734.2	115476
Afr	Urban	Biomass	1995	47418.4	60053.5	74061.7
Amr	Urban	Biomass	1995	9706.04	16707.9	29762.8
Emr	Urban	Biomass	1995	16908.8	24960.8	34209.3
Eur	Urban	Biomass	1995	2993.41	5842.53	14823.1
Sear	Urban	Biomass	1995	89295.5	117721	153276
Wpr	Urban	Biomass	1995	21155.5	45002.6	104211
Afr	Urban	Biomass	1996	49939.1	61865	74773.6
Amr	Urban	Biomass	1996	9848.67	16120.6	28671.9
Emr	Urban	Biomass	1996	18223.3	25273.9	33277.3
Eur	Urban	Biomass	1996	2829.82	5651.45	14076.9
Sear	Urban	Biomass	1996	87047.6	119174	153870
Wpr	Urban	Biomass	1996	21498.2	46698.2	109401
Afr	Urban	Biomass	1997	52837	63755.3	76519.3
Amr	Urban	Biomass	1997	10262.6	15946.3	27267.5
Emr	Urban	Biomass	1997	17702.3	25248.7	33300.5
Eur	Urban	Biomass	1997	2867.56	5330.2	12625.8
Sear	Urban	Biomass	1997	89615.9	119021	153790
Wpr	Urban	Biomass	1997	22459.6	48275.8	104465
Afr	Urban	Biomass	1998	54423.7	65635.3	78005.1
Amr	Urban	Biomass	1998	10088.3	16286.7	29148.1
Emr	Urban	Biomass	1998	18420.9	25665.9	33975
Eur	Urban	Biomass	1998	2873	5106.67	11300.2
Sear	Urban	Biomass	1998	91327.8	120472	159068
Wpr	Urban	Biomass	1998	23830.1	50991.3	108457
Afr	Urban	Biomass	1999	57619.4	67539.9	79220.6
Amr	Urban	Biomass	1999	10194.6	15791.6	27726.5
Emr	Urban	Biomass	1999	19099	25615	33588.7
Eur	Urban	Biomass	1999	2611.55	4756.93	12068.5
Sear	Urban	Biomass	1999	91738.3	122096	158320
Wpr	Urban	Biomass	1999	23656.7	51727	102588
Afr	Urban	Biomass	2000	59497.9	69519.8	80491.8
Amr	Urban	Biomass	2000	10404.7	16087.9	29058.6
Emr	Urban	Biomass	2000	18597.3	25644.7	33136.5
Eur	Urban	Biomass	2000	2662.74	4608.64	10927.2
Sear	Urban	Biomass	2000	94086.9	124406	163920
Wpr	Urban	Biomass	2000	24722.3	55479.1	108679
Afr	Urban	Biomass	2001	62973.7	71737.5	82889.1
Amr	Urban	Biomass	2001	10356.7	15592.2	28552.7
Emr	Urban	Biomass	2001	18795	25354.4	33005.6
Eur	Urban	Biomass	2001	2598.25	4526.88	10716
Sear	Urban	Biomass	2001	97467.7	127234	165508
Wpr	Urban	Biomass	2001	27762.4	58706.8	113641
Afr	Urban	Biomass	2002	64556.2	73617	83646.3
Amr	Urban	Biomass	2002	10046.9	15345.3	28640.3
Emr	Urban	Biomass	2002	18287	25014.8	32390.9
Eur	Urban	Biomass	2002	2544.08	4505.45	11531.2
Sear	Urban	Biomass	2002	95606.3	131020	170517
Wpr	Urban	Biomass	2002	27675.1	61276.8	112548
Afr	Urban	Biomass	2003	67570.3	75894.2	85045.6
Amr	Urban	Biomass	2003	10326.1	15939.6	27093.2
Emr	Urban	Biomass	2003	17470.7	24400.5	31946.6
Eur	Urban	Biomass	2003	2583.86	4378.54	12928.7
Sear	Urban	Biomass	2003	100422	133781	173215
Wpr	Urban	Biomass	2003	28647.4	65743.4	117705
Afr	Urban	Biomass	2004	69268.6	77849.4	87674.5
Amr	Urban	Biomass	2004	10301.3	15646.8	25719.5
Emr	Urban	Biomass	2004	17064.2	23762.5	32493.7
Eur	Urban	Biomass	2004	2453.61	4381.69	13542.3
Sear	Urban	Biomass	2004	99211.1	134929	172290
Wpr	Urban	Biomass	2004	32038.2	69126.4	119307
Afr	Urban	Biomass	2005	71076.8	79810.8	88835.1
Amr	Urban	Biomass	2005	10843.2	15756.3	26237.3
Emr	Urban	Biomass	2005	16113.7	22672.5	30670.9
Eur	Urban	Biomass	2005	2514.66	4311.69	12452.2
Sear	Urban	Biomass	2005	103463	138441	181354
Wpr	Urban	Biomass	2005	34115.7	73637.5	136765
Afr	Urban	Biomass	2006	72501.4	82378.2	92450.6
Amr	Urban	Biomass	2006	10717.3	15942.4	26787.7
Emr	Urban	Biomass	2006	14511.7	21420.3	29210.6
Eur	Urban	Biomass	2006	2607.81	4537.74	14935.4
Sear	Urban	Biomass	2006	105079	140756	182191
Wpr	Urban	Biomass	2006	35790	78160.8	140266
Afr	Urban	Biomass	2007	74595.9	84045.4	93226.3
Amr	Urban	Biomass	2007	11066.3	16241.2	26049.1
Emr	Urban	Biomass	2007	13780.2	19931.3	27907
Eur	Urban	Biomass	2007	2657.71	4492.58	15721
Sear	Urban	Biomass	2007	103204	141916	184637
Wpr	Urban	Biomass	2007	37773.9	81176.3	148031
Afr	Urban	Biomass	2008	76863.9	86018.7	95993.1
Amr	Urban	Biomass	2008	10934.3	15907.2	25603.8
Emr	Urban	Biomass	2008	12254.8	18835.2	26275.1
Eur	Urban	Biomass	2008	2640.96	4952.72	17468.4
Sear	Urban	Biomass	2008	104730	142727	186217
Wpr	Urban	Biomass	2008	37759.4	87153.3	162183
Afr	Urban	Biomass	2009	79222.6	88201.4	98358.7
Amr	Urban	Biomass	2009	11281.4	16226.2	25570.8
Emr	Urban	Biomass	2009	11223.1	17370.5	24993.5
Eur	Urban	Biomass	2009	2715.94	5087.38	21506.8
Sear	Urban	Biomass	2009	106715	142977	188836
Wpr	Urban	Biomass	2009	40629.8	88997.1	175877
Afr	Urban	Biomass	2010	80460.1	91141.8	101172
Amr	Urban	Biomass	2010	11290.5	16360.5	25893.5
Emr	Urban	Biomass	2010	9888.19	16076.3	24479.1
Eur	Urban	Biomass	2010	2727.49	5470.29	23592.7
Sear	Urban	Biomass	2010	103702	141766	187748
Wpr	Urban	Biomass	2010	39399.7	93479.3	177190
Afr	Urban	Biomass	2011	83125.4	93470.1	104268
Amr	Urban	Biomass	2011	11426.1	16563.3	26943.8
Emr	Urban	Biomass	2011	9087.66	15124.6	22758.3
Eur	Urban	Biomass	2011	2799.37	5925.81	24399
Sear	Urban	Biomass	2011	100534	140254	187935
Wpr	Urban	Biomass	2011	39772.7	97646.1	187940
Afr	Urban	Biomass	2012	85484.1	96828.9	107976
Amr	Urban	Biomass	2012	11319.7	16964	25911.6
Emr	Urban	Biomass	2012	8380.84	14446.6	23214.8
Eur	Urban	Biomass	2012	2754.13	6352.56	29857.8
Sear	Urban	Biomass	2012	97178.2	136950	188973
Wpr	Urban	Biomass	2012	38853.5	100149	201568
Afr	Urban	Biomass	2013	88313.1	100070	111908
Amr	Urban	Biomass	2013	11392	17160.9	27134.3
Emr	Urban	Biomass	2013	7849.2	13896.6	22004.1
Eur	Urban	Biomass	2013	2897.42	6922.48	33241.5
Sear	Urban	Biomass	2013	92916.2	133788	181646
Wpr	Urban	Biomass	2013	39804.5	103298	213010
Afr	Urban	Biomass	2014	90218	103679	116517
Amr	Urban	Biomass	2014	11580.1	17548.9	27942.7
Emr	Urban	Biomass	2014	7739.65	13670.1	22267.6
Eur	Urban	Biomass	2014	2788.72	7352.23	32326.3
Sear	Urban	Biomass	2014	87333.5	127457	180066
Wpr	Urban	Biomass	2014	35704	106888	233748
Afr	Urban	Biomass	2015	94490.7	107580	120745
Amr	Urban	Biomass	2015	11902.4	17642.5	27368.2
Emr	Urban	Biomass	2015	7280.14	13659.7	23319.7
Eur	Urban	Biomass	2015	2662.49	7971.42	41834.9
Sear	Urban	Biomass	2015	83458.8	122873	183977
Wpr	Urban	Biomass	2015	33900.3	108131	241726
Afr	Urban	Biomass	2016	96564.5	111855	127216
Amr	Urban	Biomass	2016	12120.6	18240	27939.8
Emr	Urban	Biomass	2016	6853.87	13569.7	23007.8
Eur	Urban	Biomass	2016	2880.89	8798.16	43660.3
Sear	Urban	Biomass	2016	73375.8	119864	184256
Wpr	Urban	Biomass	2016	34231	110140	288419
Afr	Urban	Biomass	2017	100992	116168	133844
Amr	Urban	Biomass	2017	11515.5	18446.8	28595.9
Emr	Urban	Biomass	2017	6483.46	13450.3	24248.8
Eur	Urban	Biomass	2017	2843.98	9638.49	51664.9
Sear	Urban	Biomass	2017	70033.8	112261	185606
Wpr	Urban	Biomass	2017	32221.9	112993	303943
Afr	Urban	Biomass	2018	103102	120915	138262
Amr	Urban	Biomass	2018	12207	19045.3	29934.4
Emr	Urban	Biomass	2018	6179.55	13505.8	23762.5
Eur	Urban	Biomass	2018	2844.79	9921.16	63883
Sear	Urban	Biomass	2018	62426.6	108514	186121
Wpr	Urban	Biomass	2018	29437.1	115627	350293
Afr	Urban	Biomass	2019	106298	125532	145358
Amr	Urban	Biomass	2019	11209.8	19526.7	32967.8
Emr	Urban	Biomass	2019	5846.77	14096.1	27029.7
Eur	Urban	Biomass	2019	2955.46	11062.6	66987.9
Sear	Urban	Biomass	2019	54557.8	104852	195217
Wpr	Urban	Biomass	2019	25786.3	119575	338132
Afr	Urban	Biomass	2020	107925	129818	153513
Amr	Urban	Biomass	2020	11545.9	20490.4	35558.1
Emr	Urban	Biomass	2020	5922.28	14105.4	29032.9
Eur	Urban	Biomass	2020	3209.71	12072	73843.3
Sear	Urban	Biomass	2020	52015.8	98366.9	194923
Wpr	Urban	Biomass	2020	23624.4	117778	405294
Afr	Urban	Biomass	2021	110693	134632	159706
Amr	Urban	Biomass	2021	12083	21121.1	37515.3
Emr	Urban	Biomass	2021	5038.69	14421.4	31697.5
Eur	Urban	Biomass	2021	3121.68	12840.2	79069.1
Sear	Urban	Biomass	2021	47862.8	96451.7	200747
Wpr	Urban	Biomass	2021	21880.2	118534	425863
Afr	Urban	Biomass	2022	113498	139082	169462
Amr	Urban	Biomass	2022	11429.1	21564.1	38412.6
Emr	Urban	Biomass	2022	5504.26	14820.1	31758.4
Eur	Urban	Biomass	2022	3369.21	13919.7	85458
Sear	Urban	Biomass	2022	39254.9	92292.1	206851
Wpr	Urban	Biomass	2022	21165.5	113568	470818
Afr	Urban	Biomass	2023	114749	144905	174496
Amr	Urban	Biomass	2023	11569.2	22948.4	42246
Emr	Urban	Biomass	2023	5252.32	15258.5	37904.6
Eur	Urban	Biomass	2023	3349.51	14921	90575.1
Sear	Urban	Biomass	2023	36343.5	87075.9	207136
Wpr	Urban	Biomass	2023	19738.4	114409	507066
Afr	Urban	Biomass	2024	116057	148810	183423
Amr	Urban	Biomass	2024	10772.9	23835.2	46570.2
Emr	Urban	Biomass	2024	5038.72	15830.5	39996.1
Eur	Urban	Biomass	2024	3012.79	15973.4	97526.8
Sear	Urban	Biomass	2024	33457.9	82038.3	207676
Wpr	Urban	Biomass	2024	19175.2	112820	536135
Afr	Urban	Biomass	2025	116635	153518	190902
Amr	Urban	Biomass	2025	11209.8	24934.6	51123
Emr	Urban	Biomass	2025	4697.51	16191.6	43600
Eur	Urban	Biomass	2025	3418.31	17166	98411.8
Sear	Urban	Biomass	2025	30663.6	79163.3	223324
Wpr	Urban	Biomass	2025	18377	112617	565686
Afr	Urban	Biomass	2026	118064	157927	203522
Amr	Urban	Biomass	2026	11226.1	26433.1	55509.5
Emr	Urban	Biomass	2026	4616.92	16766.6	46763.9
Eur	Urban	Biomass	2026	3412.14	18652.4	103554
Sear	Urban	Biomass	2026	27041	76531	224021
Wpr	Urban	Biomass	2026	17030.2	113184	635404
Afr	Urban	Biomass	2027	120530	163326	208247
Amr	Urban	Biomass	2027	11413.3	27035	61425.8
Emr	Urban	Biomass	2027	4356.86	17525.9	52461.5
Eur	Urban	Biomass	2027	3452.76	19932.8	109224
Sear	Urban	Biomass	2027	25729.3	75553.8	242458
Wpr	Urban	Biomass	2027	14671.3	112386	633492
Afr	Urban	Biomass	2028	119734	167832	219251
Amr	Urban	Biomass	2028	10940.8	28357.8	67022
Emr	Urban	Biomass	2028	4630.91	18067.2	55231.7
Eur	Urban	Biomass	2028	3354.27	20871.4	111083
Sear	Urban	Biomass	2028	23417.1	69685.8	247882
Wpr	Urban	Biomass	2028	14903.2	111610	669760
Afr	Urban	Biomass	2029	119753	171720	225105
Amr	Urban	Biomass	2029	11773.7	30450.9	73190.5
Emr	Urban	Biomass	2029	3701.72	18585.8	69235.1
Eur	Urban	Biomass	2029	3575.58	22096.2	111824
Sear	Urban	Biomass	2029	22178.4	70100.2	249398
Wpr	Urban	Biomass	2029	14705.4	110534	727069
Afr	Urban	Biomass	2030	120700	176946	240615
Amr	Urban	Biomass	2030	11627.8	31194.5	79114.7
Emr	Urban	Biomass	2030	3398.71	19380.9	71365.6
Eur	Urban	Biomass	2030	3599.43	22563.2	113757
Sear	Urban	Biomass	2030	17389.6	67076	264031
Wpr	Urban	Biomass	2030	13761.5	110123	763033
Afr	Urban	Charcoal	1990	17048.9	22507.9	30004.3
Amr	Urban	Charcoal	1990	930.112	2039.98	5437.04
Emr	Urban	Charcoal	1990	583.204	2040.59	4250.46
Eur	Urban	Charcoal	1990	91.1439	566.716	4160.02
Sear	Urban	Charcoal	1990	2362.95	7514.98	18829.1
Wpr	Urban	Charcoal	1990	2103.93	5762.25	10062.2
Afr	Urban	Charcoal	1991	17713.1	23834.6	31340.4
Amr	Urban	Charcoal	1991	1052.46	2119.14	4703.41
Emr	Urban	Charcoal	1991	703.697	2074.8	4064.43
Eur	Urban	Charcoal	1991	98.1379	508.805	3094.63
Sear	Urban	Charcoal	1991	2683.06	7719.8	18909
Wpr	Urban	Charcoal	1991	2392.27	6038.78	9955.79
Afr	Urban	Charcoal	1992	19085.6	25098.3	32439.9
Amr	Urban	Charcoal	1992	1108.97	2209.85	4501.59
Emr	Urban	Charcoal	1992	786.785	2124.11	4323.06
Eur	Urban	Charcoal	1992	77.5611	444.367	2624.95
Sear	Urban	Charcoal	1992	2930.4	7901.41	18534.1
Wpr	Urban	Charcoal	1992	2233.39	6197.6	10787
Afr	Urban	Charcoal	1993	20649.9	26405	33892.9
Amr	Urban	Charcoal	1993	1219.77	2262.84	4375.82
Emr	Urban	Charcoal	1993	836.858	2177.05	4277.87
Eur	Urban	Charcoal	1993	77.4675	397.039	2934.92
Sear	Urban	Charcoal	1993	2777.94	7888.86	16331
Wpr	Urban	Charcoal	1993	2250.71	6303.7	10459.2
Afr	Urban	Charcoal	1994	21875.7	27984.5	35211.4
Amr	Urban	Charcoal	1994	1314.7	2346.28	4492.46
Emr	Urban	Charcoal	1994	1012.87	2213.08	4661.28
Eur	Urban	Charcoal	1994	73.6346	358.933	2665.95
Sear	Urban	Charcoal	1994	3141.53	8131.39	15298.5
Wpr	Urban	Charcoal	1994	2188.83	6370.19	10331.2
Afr	Urban	Charcoal	1995	23384.6	29805.8	37218
Amr	Urban	Charcoal	1995	1452.67	2449.32	4721.63
Emr	Urban	Charcoal	1995	1138.49	2317.86	4809.92
Eur	Urban	Charcoal	1995	65.4377	308.28	2127.34
Sear	Urban	Charcoal	1995	3489.53	8236.49	15171
Wpr	Urban	Charcoal	1995	2104.67	6327.7	10719.2
Afr	Urban	Charcoal	1996	25404.5	31622.5	38781.9
Amr	Urban	Charcoal	1996	1567.72	2601.22	4498.57
Emr	Urban	Charcoal	1996	1187.67	2338.67	4495.41
Eur	Urban	Charcoal	1996	57.1808	276.377	1702.42
Sear	Urban	Charcoal	1996	3698.91	8374.93	14433.3
Wpr	Urban	Charcoal	1996	2122.18	6278.88	11236.8
Afr	Urban	Charcoal	1997	27532.2	33654.1	40682
Amr	Urban	Charcoal	1997	1781.55	2714.74	4884.72
Emr	Urban	Charcoal	1997	1340.48	2485.39	4891.18
Eur	Urban	Charcoal	1997	54.5709	244.009	1572.07
Sear	Urban	Charcoal	1997	3669.73	8575.18	15333.4
Wpr	Urban	Charcoal	1997	2093.95	6082.18	10344.5
Afr	Urban	Charcoal	1998	29975.2	35861	42622.7
Amr	Urban	Charcoal	1998	1839.48	2844.79	4611.6
Emr	Urban	Charcoal	1998	1588.34	2601.89	5022.29
Eur	Urban	Charcoal	1998	46.8651	216.894	1478.92
Sear	Urban	Charcoal	1998	4527.93	8726.43	14078.2
Wpr	Urban	Charcoal	1998	2256.43	5808.02	10376.3
Afr	Urban	Charcoal	1999	32417.6	38279.4	45149.8
Amr	Urban	Charcoal	1999	1963.65	2999.35	5148.2
Emr	Urban	Charcoal	1999	1653.73	2680.56	5305.35
Eur	Urban	Charcoal	1999	46.7458	191.15	1401.74
Sear	Urban	Charcoal	1999	4607.96	8965.64	14692.4
Wpr	Urban	Charcoal	1999	2240.09	5616.01	10094.6
Afr	Urban	Charcoal	2000	34982.6	40917.2	47598.8
Amr	Urban	Charcoal	2000	2231.28	3192.84	5567.13
Emr	Urban	Charcoal	2000	1888.07	2842.19	4805.63
Eur	Urban	Charcoal	2000	42.5038	168.649	1253.15
Sear	Urban	Charcoal	2000	5415.56	9183.09	16179.5
Wpr	Urban	Charcoal	2000	2254.98	5431.77	9814.05
Afr	Urban	Charcoal	2001	38188.7	43831	49996.6
Amr	Urban	Charcoal	2001	2357.76	3471.72	6027.96
Emr	Urban	Charcoal	2001	2036.66	2987.77	5828.21
Eur	Urban	Charcoal	2001	35.241	147.781	1043.96
Sear	Urban	Charcoal	2001	5763.16	9324.13	14094.1
Wpr	Urban	Charcoal	2001	2353.23	5300.03	10058.1
Afr	Urban	Charcoal	2002	40878.4	46935.8	53152.7
Amr	Urban	Charcoal	2002	2526.17	3775.64	6302.19
Emr	Urban	Charcoal	2002	2249.03	3121.12	5793.26
Eur	Urban	Charcoal	2002	35.9705	129.296	929.189
Sear	Urban	Charcoal	2002	6056.94	9534.76	15282.7
Wpr	Urban	Charcoal	2002	2397.61	5242.86	10067.8
Afr	Urban	Charcoal	2003	43945.8	50063.3	56571.8
Amr	Urban	Charcoal	2003	2893.35	4161.97	7415.37
Emr	Urban	Charcoal	2003	2465.26	3443.2	6799.54
Eur	Urban	Charcoal	2003	30.9355	118.086	921.29
Sear	Urban	Charcoal	2003	6098.22	9626.26	14777.6
Wpr	Urban	Charcoal	2003	2505.45	5378.7	9905.48
Afr	Urban	Charcoal	2004	47376	53333.5	59782.1
Amr	Urban	Charcoal	2004	3111.36	4327.63	7281.09
Emr	Urban	Charcoal	2004	2743.62	3693.99	7358.2
Eur	Urban	Charcoal	2004	29.4877	105.227	644.66
Sear	Urban	Charcoal	2004	6285.34	10027.3	15452.8
Wpr	Urban	Charcoal	2004	2690.08	5469.8	10284.7
Afr	Urban	Charcoal	2005	50944.1	57097	63314.3
Amr	Urban	Charcoal	2005	3296.21	4622.06	8086.25
Emr	Urban	Charcoal	2005	2887.15	4135.26	7675.64
Eur	Urban	Charcoal	2005	26.5221	93.7415	517.667
Sear	Urban	Charcoal	2005	6313.67	10054.1	15436.3
Wpr	Urban	Charcoal	2005	3165.09	5838.55	9952.75
Afr	Urban	Charcoal	2006	54358.7	60653.8	66801.8
Amr	Urban	Charcoal	2006	3488.4	4897.03	8184.21
Emr	Urban	Charcoal	2006	3151.68	4688.77	7957.75
Eur	Urban	Charcoal	2006	23.3415	81.3089	656.31
Sear	Urban	Charcoal	2006	6465.8	10017.1	16863
Wpr	Urban	Charcoal	2006	3377.01	6288.86	11076.2
Afr	Urban	Charcoal	2007	58914.7	64795.5	71626.7
Amr	Urban	Charcoal	2007	3639.58	5154.55	8726.6
Emr	Urban	Charcoal	2007	3139.88	5098.62	8517.33
Eur	Urban	Charcoal	2007	20.1884	74.8092	557.143
Sear	Urban	Charcoal	2007	6393.04	10021.5	15582.1
Wpr	Urban	Charcoal	2007	3480.22	6511.99	10720.4
Afr	Urban	Charcoal	2008	62226.3	69195	75951.8
Amr	Urban	Charcoal	2008	3684.44	5341.55	9532.63
Emr	Urban	Charcoal	2008	3453.03	5719.28	8821.63
Eur	Urban	Charcoal	2008	20.5371	68.4137	419.844
Sear	Urban	Charcoal	2008	6194.25	10081.8	16512.7
Wpr	Urban	Charcoal	2008	3600.86	6910.51	11690.4
Afr	Urban	Charcoal	2009	67095.9	73467.6	80359.9
Amr	Urban	Charcoal	2009	4055.98	5511.35	9221.37
Emr	Urban	Charcoal	2009	3803.21	6421.13	9473.22
Eur	Urban	Charcoal	2009	16.4243	60.8087	363.39
Sear	Urban	Charcoal	2009	6267.07	9950.92	16269.6
Wpr	Urban	Charcoal	2009	3623.17	7183.98	11961.9
Afr	Urban	Charcoal	2010	71028.8	77919	85752.8
Amr	Urban	Charcoal	2010	4200.8	5745.33	9346.28
Emr	Urban	Charcoal	2010	4267.79	7080.62	10202.5
Eur	Urban	Charcoal	2010	17.8837	57.3998	373.294
Sear	Urban	Charcoal	2010	5993.51	9617.24	15920
Wpr	Urban	Charcoal	2010	4264.1	7518.57	12201.1
Afr	Urban	Charcoal	2011	75187.6	82636.7	91020.7
Amr	Urban	Charcoal	2011	4400.71	5976	9929.82
Emr	Urban	Charcoal	2011	4731.68	7639.95	10862.7
Eur	Urban	Charcoal	2011	15.2646	53.4004	316.562
Sear	Urban	Charcoal	2011	5415.46	9449.12	16575
Wpr	Urban	Charcoal	2011	4293.39	7741.63	12149.4
Afr	Urban	Charcoal	2012	79478.2	87527	96119
Amr	Urban	Charcoal	2012	4461.06	6109.84	10006.1
Emr	Urban	Charcoal	2012	4880.76	8097.77	11107.6
Eur	Urban	Charcoal	2012	14.853	53.3019	378.192
Sear	Urban	Charcoal	2012	5302.02	9149.85	16542.8
Wpr	Urban	Charcoal	2012	4329.46	8014.26	13152.5
Afr	Urban	Charcoal	2013	83290.2	92141.2	101661
Amr	Urban	Charcoal	2013	4520.78	6230.31	10229.6
Emr	Urban	Charcoal	2013	5201.85	8441.97	11280.7
Eur	Urban	Charcoal	2013	13.5794	52.9693	351.262
Sear	Urban	Charcoal	2013	4978.76	8668.29	15995.3
Wpr	Urban	Charcoal	2013	4298.55	8104.64	13027.6
Afr	Urban	Charcoal	2014	87906.3	97432.8	107833
Amr	Urban	Charcoal	2014	4402.2	6346.74	10990.2
Emr	Urban	Charcoal	2014	5452.84	8759.77	11606.9
Eur	Urban	Charcoal	2014	12.5017	51.7172	303.053
Sear	Urban	Charcoal	2014	4475.69	8189.42	15868.5
Wpr	Urban	Charcoal	2014	4498.9	7868.17	13342.7
Afr	Urban	Charcoal	2015	91897.6	102773	114018
Amr	Urban	Charcoal	2015	4596.24	6498.2	11133.8
Emr	Urban	Charcoal	2015	5772.61	9012.52	12468.8
Eur	Urban	Charcoal	2015	10.8942	52.0377	407.193
Sear	Urban	Charcoal	2015	3894.31	7772.53	16638.6
Wpr	Urban	Charcoal	2015	4330.38	7984.28	13834.8
Afr	Urban	Charcoal	2016	95872.8	107676	119895
Amr	Urban	Charcoal	2016	4599.2	6734.56	11410.8
Emr	Urban	Charcoal	2016	6177.79	9432.84	13049.5
Eur	Urban	Charcoal	2016	11.4094	53.4136	351.561
Sear	Urban	Charcoal	2016	3341.99	7181.54	15770.1
Wpr	Urban	Charcoal	2016	4097.5	7544.48	12893
Afr	Urban	Charcoal	2017	99748.7	112968	127808
Amr	Urban	Charcoal	2017	4651.12	6793.56	12183.7
Emr	Urban	Charcoal	2017	6491.68	9749.84	13639.4
Eur	Urban	Charcoal	2017	10.7145	50.8847	401.504
Sear	Urban	Charcoal	2017	2920.46	6965.13	16727.7
Wpr	Urban	Charcoal	2017	3958.61	7320.27	13155.7
Afr	Urban	Charcoal	2018	102821	118442	135160
Amr	Urban	Charcoal	2018	4800.04	6854.31	12235.3
Emr	Urban	Charcoal	2018	6531.36	9976.58	14524.8
Eur	Urban	Charcoal	2018	9.9142	55.692	456.503
Sear	Urban	Charcoal	2018	2678.73	6666.78	17480.5
Wpr	Urban	Charcoal	2018	3731.09	6945.6	13466.3
Afr	Urban	Charcoal	2019	106928	123846	142754
Amr	Urban	Charcoal	2019	4566.76	7046.61	12718.9
Emr	Urban	Charcoal	2019	6626.12	10205.9	15180.7
Eur	Urban	Charcoal	2019	9.0658	57.8305	469.319
Sear	Urban	Charcoal	2019	2293.52	6519.1	17260.4
Wpr	Urban	Charcoal	2019	3332.19	6819.84	13185.4
Afr	Urban	Charcoal	2020	109239	130045	151097
Amr	Urban	Charcoal	2020	4486.08	7242.78	15174.7
Emr	Urban	Charcoal	2020	6785.66	10511.1	15700.5
Eur	Urban	Charcoal	2020	8.12058	60.0314	664.542
Sear	Urban	Charcoal	2020	2014.38	6262.68	18217.3
Wpr	Urban	Charcoal	2020	3256.06	6660.17	13678
Afr	Urban	Charcoal	2021	113638	135330	159488
Amr	Urban	Charcoal	2021	4569.63	7347.5	15665.7
Emr	Urban	Charcoal	2021	6983.21	10862.1	17071.2
Eur	Urban	Charcoal	2021	9.29459	65.2128	784.019
Sear	Urban	Charcoal	2021	1569.1	6230.91	20929.1
Wpr	Urban	Charcoal	2021	2688.03	6308.95	13872.7
Afr	Urban	Charcoal	2022	115382	141976	171329
Amr	Urban	Charcoal	2022	4331.53	7579.26	15925.3
Emr	Urban	Charcoal	2022	6955.6	11025.3	18160.2
Eur	Urban	Charcoal	2022	7.81648	68.8858	869.522
Sear	Urban	Charcoal	2022	1466.79	6067.05	23666.1
Wpr	Urban	Charcoal	2022	2540.72	6100.64	14486.2
Afr	Urban	Charcoal	2023	118839	147807	181579
Amr	Urban	Charcoal	2023	4305.9	7780.36	17397.6
Emr	Urban	Charcoal	2023	7161.89	11230.6	18623.7
Eur	Urban	Charcoal	2023	8.65746	69.9	992.661
Sear	Urban	Charcoal	2023	1480.71	6124.22	25948.3
Wpr	Urban	Charcoal	2023	2397.29	5748.42	15214.4
Afr	Urban	Charcoal	2024	120576	152655	191566
Amr	Urban	Charcoal	2024	4029.3	7970.81	18500
Emr	Urban	Charcoal	2024	7032.75	11849.3	20495.5
Eur	Urban	Charcoal	2024	8.16848	78.5283	1645.35
Sear	Urban	Charcoal	2024	1031.08	6109.7	25730.1
Wpr	Urban	Charcoal	2024	2139.08	5664.14	16417.7
Afr	Urban	Charcoal	2025	124475	159733	203790
Amr	Urban	Charcoal	2025	4058.77	8127.07	22030.4
Emr	Urban	Charcoal	2025	7040.95	12091	21051.8
Eur	Urban	Charcoal	2025	7.98158	88.5828	1646.32
Sear	Urban	Charcoal	2025	1072.15	6053.73	26498.4
Wpr	Urban	Charcoal	2025	2044.8	5476.16	17108.1
Afr	Urban	Charcoal	2026	127033	167006	213917
Amr	Urban	Charcoal	2026	4026.7	8338.65	24393.7
Emr	Urban	Charcoal	2026	6927.22	12330.8	22854
Eur	Urban	Charcoal	2026	6.83368	93.5741	1564.34
Sear	Urban	Charcoal	2026	845.311	6096.74	33129.6
Wpr	Urban	Charcoal	2026	1762.92	5377.78	17860.6
Afr	Urban	Charcoal	2027	128399	173304	227122
Amr	Urban	Charcoal	2027	3851.84	8438.23	25743.3
Emr	Urban	Charcoal	2027	6761.26	12482.6	24494.7
Eur	Urban	Charcoal	2027	7.11397	97.5634	1769.74
Sear	Urban	Charcoal	2027	638.219	6204.39	35111.6
Wpr	Urban	Charcoal	2027	1563.28	5092.35	16925.7
Afr	Urban	Charcoal	2028	130961	179317	240858
Amr	Urban	Charcoal	2028	3398.46	8837.38	26003.7
Emr	Urban	Charcoal	2028	6774.03	13003.7	26288.8
Eur	Urban	Charcoal	2028	6.7187	106.863	2747.88
Sear	Urban	Charcoal	2028	621.237	6283.73	34460.9
Wpr	Urban	Charcoal	2028	1560.67	4793	18430.7
Afr	Urban	Charcoal	2029	133065	183895	250751
Amr	Urban	Charcoal	2029	3321.36	8861.54	30031.4
Emr	Urban	Charcoal	2029	6055.12	13611.1	28600.9
Eur	Urban	Charcoal	2029	7.95521	114.96	3664.59
Sear	Urban	Charcoal	2029	743.063	6375.02	41577.4
Wpr	Urban	Charcoal	2029	1424.83	4781.22	20803.8
Afr	Urban	Charcoal	2030	136003	192981	267724
Amr	Urban	Charcoal	2030	3294.14	9147.15	35840.9
Emr	Urban	Charcoal	2030	6409.33	13840.3	30484.6
Eur	Urban	Charcoal	2030	7.55865	139.572	3294.92
Sear	Urban	Charcoal	2030	644.73	6315.46	43370.7
Wpr	Urban	Charcoal	2030	1234.26	4662.5	19348.4
Afr	Urban	Coal	1990	610.47	1941.48	5435.05
Amr	Urban	Coal	1990	166.168	1043.67	1815.39
Emr	Urban	Coal	1990	0.83083	69.9798	1615.62
Eur	Urban	Coal	1990	581.648	3566.13	16778.2
Sear	Urban	Coal	1990	13072.1	27515.7	44824.8
Wpr	Urban	Coal	1990	8936.47	77244.1	213384
Afr	Urban	Coal	1991	548.874	1912.91	5498.1
Amr	Urban	Coal	1991	207.274	885.149	1684.91
Emr	Urban	Coal	1991	0.715284	57.9479	1454.24
Eur	Urban	Coal	1991	627.145	3504.79	14403.1
Sear	Urban	Coal	1991	13790.6	26845.4	41517.9
Wpr	Urban	Coal	1991	10259.2	84020.5	222572
Afr	Urban	Coal	1992	588.961	1892.93	5108.66
Amr	Urban	Coal	1992	182.703	764.002	1458.08
Emr	Urban	Coal	1992	0.746174	52.3725	1310.64
Eur	Urban	Coal	1992	611.489	3378.74	13724.3
Sear	Urban	Coal	1992	12090.7	24526.4	39769.8
Wpr	Urban	Coal	1992	13970.9	86320.7	217241
Afr	Urban	Coal	1993	633.387	1897.91	5146.93
Amr	Urban	Coal	1993	154.742	666.449	1314.24
Emr	Urban	Coal	1993	0.486805	46.1094	1176.58
Eur	Urban	Coal	1993	722.154	3212.13	12755.1
Sear	Urban	Coal	1993	13028.2	23690.8	38590.2
Wpr	Urban	Coal	1993	17739.1	91044.3	206175
Afr	Urban	Coal	1994	608.035	1887.9	4662.24
Amr	Urban	Coal	1994	152.81	590.402	1185.16
Emr	Urban	Coal	1994	0.669837	45.2716	892.535
Eur	Urban	Coal	1994	681.007	3124.15	11000.3
Sear	Urban	Coal	1994	12117.8	23037	36897
Wpr	Urban	Coal	1994	19640.8	92817.2	206071
Afr	Urban	Coal	1995	613.935	1846.55	4448.46
Amr	Urban	Coal	1995	134.767	513.123	1047.6
Emr	Urban	Coal	1995	0.531985	44.1512	840.057
Eur	Urban	Coal	1995	575.387	2906.03	10566
Sear	Urban	Coal	1995	11551.5	22086.3	34279.1
Wpr	Urban	Coal	1995	21795.4	95559	207512
Afr	Urban	Coal	1996	579.355	1875.13	4741.06
Amr	Urban	Coal	1996	99.278	463.513	1046.76
Emr	Urban	Coal	1996	0.76437	42.4259	608.411
Eur	Urban	Coal	1996	731.376	2853.84	9380.45
Sear	Urban	Coal	1996	11654.1	21268	32325.7
Wpr	Urban	Coal	1996	27352.6	100640	198593
Afr	Urban	Coal	1997	623.031	1882.9	4554.91
Amr	Urban	Coal	1997	120.671	413.219	875.839
Emr	Urban	Coal	1997	0.546541	36.3127	611.539
Eur	Urban	Coal	1997	602.601	2592.13	8316.4
Sear	Urban	Coal	1997	10205	20681.3	33023.4
Wpr	Urban	Coal	1997	28393.8	103242	199644
Afr	Urban	Coal	1998	569.179	1826.02	4384.25
Amr	Urban	Coal	1998	92.5766	395.271	869.546
Emr	Urban	Coal	1998	0.790802	32.688	604.91
Eur	Urban	Coal	1998	644.319	2394.14	7482.27
Sear	Urban	Coal	1998	10445	20080.3	30708
Wpr	Urban	Coal	1998	39201.7	103034	190668
Afr	Urban	Coal	1999	599.582	1782.17	4070.77
Amr	Urban	Coal	1999	94.1268	366.793	801.31
Emr	Urban	Coal	1999	0.629807	30.7954	630.369
Eur	Urban	Coal	1999	633.634	2287.54	6674.12
Sear	Urban	Coal	1999	10002.9	19645.1	30241
Wpr	Urban	Coal	1999	41419.7	103351	188823
Afr	Urban	Coal	2000	565.141	1814.01	4191.21
Amr	Urban	Coal	2000	77.1503	358.938	834.606
Emr	Urban	Coal	2000	0.726903	32.9671	484.986
Eur	Urban	Coal	2000	585.371	2100.23	5820.14
Sear	Urban	Coal	2000	10745.6	19389.1	30301.5
Wpr	Urban	Coal	2000	40305.1	106043	184211
Afr	Urban	Coal	2001	503.703	1797.51	4089.73
Amr	Urban	Coal	2001	58.7724	380.972	857.728
Emr	Urban	Coal	2001	0.518651	30.9105	486.514
Eur	Urban	Coal	2001	582.722	1857.71	5336.39
Sear	Urban	Coal	2001	11126.4	19610.4	29670.5
Wpr	Urban	Coal	2001	42346.8	103835	185320
Afr	Urban	Coal	2002	557.57	1906.04	4376.36
Amr	Urban	Coal	2002	58.8646	389.11	880.44
Emr	Urban	Coal	2002	0.992386	34.2521	433.457
Eur	Urban	Coal	2002	490.152	1742.53	4485.79
Sear	Urban	Coal	2002	10727.2	19489.8	30560.6
Wpr	Urban	Coal	2002	42657.4	102572	184410
Afr	Urban	Coal	2003	549.376	1885.49	4325.05
Amr	Urban	Coal	2003	52.9035	390.697	943.04
Emr	Urban	Coal	2003	0.84748	29.5847	373.312
Eur	Urban	Coal	2003	471.413	1569.04	4379.39
Sear	Urban	Coal	2003	11878	19856.8	30383.4
Wpr	Urban	Coal	2003	39734	101359	175546
Afr	Urban	Coal	2004	459.863	1910.76	4718.8
Amr	Urban	Coal	2004	55.568	398.433	939.002
Emr	Urban	Coal	2004	1.26865	30.3202	334.091
Eur	Urban	Coal	2004	508.254	1461.76	3929.09
Sear	Urban	Coal	2004	12008	19393.6	30208
Wpr	Urban	Coal	2004	33089.6	100519	174503
Afr	Urban	Coal	2005	467.637	2088.54	4795.65
Amr	Urban	Coal	2005	53.373	369.002	1008.59
Emr	Urban	Coal	2005	1.3183	35.1528	333.603
Eur	Urban	Coal	2005	425.6	1346.35	3753
Sear	Urban	Coal	2005	12147	19823.8	31408.2
Wpr	Urban	Coal	2005	36289.5	97987.3	178456
Afr	Urban	Coal	2006	470.54	2091.51	4873.63
Amr	Urban	Coal	2006	37.7365	366.581	1005.18
Emr	Urban	Coal	2006	1.2323	36.38	350.911
Eur	Urban	Coal	2006	372.802	1195.01	3313.26
Sear	Urban	Coal	2006	12362	20180.8	30955.7
Wpr	Urban	Coal	2006	35578.1	92263.7	177140
Afr	Urban	Coal	2007	392.786	2261.01	5433.27
Amr	Urban	Coal	2007	28.8572	362.126	1021.85
Emr	Urban	Coal	2007	1.81837	36.946	405.648
Eur	Urban	Coal	2007	330.208	1069.37	3209.93
Sear	Urban	Coal	2007	12958.4	20141	30252.6
Wpr	Urban	Coal	2007	32568.9	88487.7	165185
Afr	Urban	Coal	2008	434.967	2381.35	5586.25
Amr	Urban	Coal	2008	27.2464	323.744	1017.47
Emr	Urban	Coal	2008	1.86417	39.5869	381.578
Eur	Urban	Coal	2008	279.998	1052.48	3123.36
Sear	Urban	Coal	2008	12324.8	19893.9	30270.7
Wpr	Urban	Coal	2008	28894.6	84277	157702
Afr	Urban	Coal	2009	464.814	2539.18	6256.39
Amr	Urban	Coal	2009	23.5138	319.143	1026.01
Emr	Urban	Coal	2009	2.20617	44.1059	534.127
Eur	Urban	Coal	2009	244.349	926.336	3139.13
Sear	Urban	Coal	2009	13222.1	20288.9	31347.4
Wpr	Urban	Coal	2009	25751.5	79211.3	156392
Afr	Urban	Coal	2010	410.596	2823.47	6480.03
Amr	Urban	Coal	2010	19.9479	292.976	915.162
Emr	Urban	Coal	2010	2.64081	52.7154	513.98
Eur	Urban	Coal	2010	214.214	836.693	3183.27
Sear	Urban	Coal	2010	12462.6	20255.9	30783
Wpr	Urban	Coal	2010	24670	72635.9	151209
Afr	Urban	Coal	2011	521.059	3326.1	7155.71
Amr	Urban	Coal	2011	16.0913	262.749	903.035
Emr	Urban	Coal	2011	2.80655	55.3238	566.765
Eur	Urban	Coal	2011	195.445	790.527	3544.92
Sear	Urban	Coal	2011	13217.4	20509.4	30753.1
Wpr	Urban	Coal	2011	21293.3	68288.9	139261
Afr	Urban	Coal	2012	499.312	3447.2	8022.09
Amr	Urban	Coal	2012	14.764	217.885	878.596
Emr	Urban	Coal	2012	3.20115	59.4314	725.582
Eur	Urban	Coal	2012	173.067	813.785	4464.85
Sear	Urban	Coal	2012	12570	20205	30778
Wpr	Urban	Coal	2012	17912.7	64092	139639
Afr	Urban	Coal	2013	569.978	4104.84	9745.95
Amr	Urban	Coal	2013	13.8148	183.716	717.851
Emr	Urban	Coal	2013	3.37131	65.8686	784.533
Eur	Urban	Coal	2013	154.29	744.167	4965.75
Sear	Urban	Coal	2013	12529.1	19707	31372.4
Wpr	Urban	Coal	2013	16441.5	57509.8	135694
Afr	Urban	Coal	2014	687.691	4518.64	10131.1
Amr	Urban	Coal	2014	11.3762	166.638	735.93
Emr	Urban	Coal	2014	2.36869	77.733	896.458
Eur	Urban	Coal	2014	136.761	750.973	6685.16
Sear	Urban	Coal	2014	12554.5	19720.3	30706.3
Wpr	Urban	Coal	2014	10654.9	54452.2	141753
Afr	Urban	Coal	2015	770.633	5246.77	11915.1
Amr	Urban	Coal	2015	12.1546	141.248	674.003
Emr	Urban	Coal	2015	3.51286	81.1543	871.083
Eur	Urban	Coal	2015	129.501	773.648	7630.35
Sear	Urban	Coal	2015	11467.9	19033.3	30834
Wpr	Urban	Coal	2015	11298.6	51082.3	154432
Afr	Urban	Coal	2016	864.452	6096.18	13539.2
Amr	Urban	Coal	2016	11.5457	136.647	654.128
Emr	Urban	Coal	2016	3.89172	95.7829	1118.74
Eur	Urban	Coal	2016	96.5284	819.987	10970.8
Sear	Urban	Coal	2016	11240.6	19178.3	32365.6
Wpr	Urban	Coal	2016	7132.06	47593.1	152341
Afr	Urban	Coal	2017	1002.52	7167.24	15799.2
Amr	Urban	Coal	2017	9.58941	124.361	736.127
Emr	Urban	Coal	2017	3.92541	107.526	1123.26
Eur	Urban	Coal	2017	81.4519	813.368	12355.7
Sear	Urban	Coal	2017	11379.9	18495.8	31977.3
Wpr	Urban	Coal	2017	6183.55	44558.7	146953
Afr	Urban	Coal	2018	1141.14	8028.72	17802.1
Amr	Urban	Coal	2018	9.39207	110.832	668.796
Emr	Urban	Coal	2018	3.60112	122.9	1287.26
Eur	Urban	Coal	2018	85.1161	887.89	17237.1
Sear	Urban	Coal	2018	10654.1	18089.1	33080.3
Wpr	Urban	Coal	2018	4158.46	40795.7	160053
Afr	Urban	Coal	2019	1350.32	8824.51	21270.9
Amr	Urban	Coal	2019	8.61204	111.859	664.997
Emr	Urban	Coal	2019	3.59634	169.27	1560.28
Eur	Urban	Coal	2019	76.4759	899.335	19806.1
Sear	Urban	Coal	2019	9822.61	17270.9	35218.3
Wpr	Urban	Coal	2019	3180.1	35903	168988
Afr	Urban	Coal	2020	1581.64	10347.9	25601.8
Amr	Urban	Coal	2020	9.14901	100.054	691.527
Emr	Urban	Coal	2020	4.82508	171.83	2040.88
Eur	Urban	Coal	2020	68.4466	988.381	23577.3
Sear	Urban	Coal	2020	10106.9	17259.6	35702.1
Wpr	Urban	Coal	2020	2033.04	34220.5	189283
Afr	Urban	Coal	2021	1894.78	11610.4	28004.9
Amr	Urban	Coal	2021	8.60826	102.421	731.527
Emr	Urban	Coal	2021	4.55473	196.435	2107.56
Eur	Urban	Coal	2021	90.0419	1087.45	28360.4
Sear	Urban	Coal	2021	9592.66	16459.4	37242.8
Wpr	Urban	Coal	2021	2124.8	31375	187247
Afr	Urban	Coal	2022	1894.94	12209.3	35508.4
Amr	Urban	Coal	2022	8.43836	116.774	869.002
Emr	Urban	Coal	2022	6.47874	230.183	2927.06
Eur	Urban	Coal	2022	58.8892	1215.92	30619.4
Sear	Urban	Coal	2022	9100.4	15998.9	40776.5
Wpr	Urban	Coal	2022	1454.65	27664.6	207399
Afr	Urban	Coal	2023	2468.95	13050	40325.9
Amr	Urban	Coal	2023	7.92012	133.098	885.497
Emr	Urban	Coal	2023	6.67222	278.711	3434.18
Eur	Urban	Coal	2023	65.0529	1263.75	42504.8
Sear	Urban	Coal	2023	8884.72	15463	38214.8
Wpr	Urban	Coal	2023	1097.13	24821.1	214157
Afr	Urban	Coal	2024	3160.84	15823.5	44682.8
Amr	Urban	Coal	2024	6.34284	114.801	929.736
Emr	Urban	Coal	2024	8.38787	338.516	3957.94
Eur	Urban	Coal	2024	64.0685	1433.62	48401.7
Sear	Urban	Coal	2024	7554.3	15042.2	40265.5
Wpr	Urban	Coal	2024	802.608	21819.6	238549
Afr	Urban	Coal	2025	3395.32	16879.1	53857.9
Amr	Urban	Coal	2025	9.32116	128.913	1089.03
Emr	Urban	Coal	2025	9.47339	364.453	4850.47
Eur	Urban	Coal	2025	49.5668	1519.27	51047.6
Sear	Urban	Coal	2025	6682.38	14744.5	43918.4
Wpr	Urban	Coal	2025	718.698	18752.7	248916
Afr	Urban	Coal	2026	4057.89	17612.1	62888.9
Amr	Urban	Coal	2026	9.40882	140.493	1246.97
Emr	Urban	Coal	2026	11.0067	465.831	5504.75
Eur	Urban	Coal	2026	61.883	1592.99	61727.3
Sear	Urban	Coal	2026	6605.1	14306.9	43946.5
Wpr	Urban	Coal	2026	576.902	17523.9	250124
Afr	Urban	Coal	2027	4642.11	19549.7	71309.1
Amr	Urban	Coal	2027	8.19197	154.263	1200.06
Emr	Urban	Coal	2027	8.3689	518.131	6312.46
Eur	Urban	Coal	2027	57.2796	1791.92	67187.6
Sear	Urban	Coal	2027	5980.38	13965.2	49201.8
Wpr	Urban	Coal	2027	400.024	15668.5	257846
Afr	Urban	Coal	2028	5265.4	21919	79587
Amr	Urban	Coal	2028	7.63747	167.451	1616.17
Emr	Urban	Coal	2028	13.0886	594.627	6993.14
Eur	Urban	Coal	2028	42.1146	1837.91	68523.3
Sear	Urban	Coal	2028	4807.45	13626.7	52459.8
Wpr	Urban	Coal	2028	479.279	14398.5	266029
Afr	Urban	Coal	2029	6295.66	25795.3	88465.8
Amr	Urban	Coal	2029	10.1242	175.899	2040.32
Emr	Urban	Coal	2029	11.9481	753.665	9248.19
Eur	Urban	Coal	2029	49.7749	2165.32	72638.8
Sear	Urban	Coal	2029	4478.52	13359	47357.1
Wpr	Urban	Coal	2029	354.242	12270.1	279661
Afr	Urban	Coal	2030	6400.91	27386.7	97448.2
Amr	Urban	Coal	2030	10.0573	199.86	2552.65
Emr	Urban	Coal	2030	14.3068	791.595	10652.2
Eur	Urban	Coal	2030	43.3755	2356.52	80315.1
Sear	Urban	Coal	2030	4214.48	13240.2	51757.9
Wpr	Urban	Coal	2030	294.2	10592.6	289434
Afr	Urban	Kerosene	1990	12650.5	23946.2	37067.8
Amr	Urban	Kerosene	1990	8572.37	14323.3	21666.8
Emr	Urban	Kerosene	1990	2379.98	10774.4	32277
Eur	Urban	Kerosene	1990	491.388	2693.61	13469.4
Sear	Urban	Kerosene	1990	68421.7	90572.3	115972
Wpr	Urban	Kerosene	1990	4234.76	7802.94	13696.1
Afr	Urban	Kerosene	1991	13427.5	25615.3	37572.7
Amr	Urban	Kerosene	1991	8561.4	13774.8	20137.3
Emr	Urban	Kerosene	1991	2668.69	10454.6	29552.2
Eur	Urban	Kerosene	1991	444.945	2368.61	12685.8
Sear	Urban	Kerosene	1991	73664.8	95455.4	119878
Wpr	Urban	Kerosene	1991	4862.15	8002.65	15644.7
Afr	Urban	Kerosene	1992	15125.8	26841.7	39167.4
Amr	Urban	Kerosene	1992	8363.97	13271.4	19210.5
Emr	Urban	Kerosene	1992	2594.4	9974.98	28703.5
Eur	Urban	Kerosene	1992	435.121	2181.78	12109.1
Sear	Urban	Kerosene	1992	79136.4	101409	126719
Wpr	Urban	Kerosene	1992	5310.6	8464.47	14480.3
Afr	Urban	Kerosene	1993	16486.3	28005.3	40184.3
Amr	Urban	Kerosene	1993	8415.31	12746.5	18880.4
Emr	Urban	Kerosene	1993	2515.83	9384.55	25192.4
Eur	Urban	Kerosene	1993	363.287	2073.82	10384
Sear	Urban	Kerosene	1993	85507.4	107217	132492
Wpr	Urban	Kerosene	1993	5651.89	8857.27	15163.4
Afr	Urban	Kerosene	1994	18336.9	29359.7	40936.7
Amr	Urban	Kerosene	1994	8295.34	12184.1	17775.7
Emr	Urban	Kerosene	1994	2564.89	8880.91	23852.8
Eur	Urban	Kerosene	1994	270.542	1790	10433.2
Sear	Urban	Kerosene	1994	88074.5	111755	137844
Wpr	Urban	Kerosene	1994	5675.73	9059.96	15288.7
Afr	Urban	Kerosene	1995	19547.4	30815.4	42654.3
Amr	Urban	Kerosene	1995	8002.41	11541.1	16519.3
Emr	Urban	Kerosene	1995	2358.46	8462.18	21622.5
Eur	Urban	Kerosene	1995	276.646	1707.27	7828.62
Sear	Urban	Kerosene	1995	92714.1	115521	140971
Wpr	Urban	Kerosene	1995	6050.47	9333.82	16837.9
Afr	Urban	Kerosene	1996	21163.9	31851.7	42941.7
Amr	Urban	Kerosene	1996	7696.06	10853.8	15774.4
Emr	Urban	Kerosene	1996	2434.62	7609.47	20021.3
Eur	Urban	Kerosene	1996	260.602	1487.29	7893.31
Sear	Urban	Kerosene	1996	95038.2	118889	144823
Wpr	Urban	Kerosene	1996	5706.23	9411.58	17482.3
Afr	Urban	Kerosene	1997	22376.1	33234.4	43681.2
Amr	Urban	Kerosene	1997	7217.32	10093.8	15476.1
Emr	Urban	Kerosene	1997	2281.11	7168.08	18307
Eur	Urban	Kerosene	1997	210.541	1327.65	7142.77
Sear	Urban	Kerosene	1997	96270.1	120232	146191
Wpr	Urban	Kerosene	1997	5811.44	9322.89	17004.1
Afr	Urban	Kerosene	1998	24394.1	34234.4	44995.6
Amr	Urban	Kerosene	1998	6563.1	9176.49	13977.9
Emr	Urban	Kerosene	1998	2410.45	6784.73	16890.2
Eur	Urban	Kerosene	1998	203.376	1194.31	5859.76
Sear	Urban	Kerosene	1998	96650.3	121133	145714
Wpr	Urban	Kerosene	1998	5794.8	8955.22	16103.8
Afr	Urban	Kerosene	1999	25715	34971.5	45652
Amr	Urban	Kerosene	1999	5875.86	8202.88	13378.2
Emr	Urban	Kerosene	1999	2341.47	6114.47	16121.7
Eur	Urban	Kerosene	1999	149.888	1028.02	6537.96
Sear	Urban	Kerosene	1999	96923	120386	145227
Wpr	Urban	Kerosene	1999	5318.93	8447.09	17713.8
Afr	Urban	Kerosene	2000	27516.2	36309.4	45610.4
Amr	Urban	Kerosene	2000	5112.3	7189.13	11849
Emr	Urban	Kerosene	2000	2086.35	5596.12	14050.6
Eur	Urban	Kerosene	2000	142.111	926.832	5342.62
Sear	Urban	Kerosene	2000	93263.3	118656	146166
Wpr	Urban	Kerosene	2000	4673.73	7727.27	15082
Afr	Urban	Kerosene	2001	29009.4	37171.8	45429.9
Amr	Urban	Kerosene	2001	4456.81	6272.11	11135.1
Emr	Urban	Kerosene	2001	1865.03	5255.97	14568.6
Eur	Urban	Kerosene	2001	122.31	882.569	5363.87
Sear	Urban	Kerosene	2001	91626.2	115257	142012
Wpr	Urban	Kerosene	2001	4118.46	7047.78	15953.7
Afr	Urban	Kerosene	2002	30467.9	38301.6	47020.4
Amr	Urban	Kerosene	2002	3731.73	5353.27	10245.1
Emr	Urban	Kerosene	2002	1758.65	4584.47	12194.3
Eur	Urban	Kerosene	2002	108.22	791.598	5157.97
Sear	Urban	Kerosene	2002	88171.9	111230	138839
Wpr	Urban	Kerosene	2002	3601.54	6421.87	13177.4
Afr	Urban	Kerosene	2003	31359.6	39210.4	47822.4
Amr	Urban	Kerosene	2003	3001.78	4524.79	8876.19
Emr	Urban	Kerosene	2003	1733.36	4291.6	11622.7
Eur	Urban	Kerosene	2003	95.166	698.443	4531.18
Sear	Urban	Kerosene	2003	82451.2	106503	135702
Wpr	Urban	Kerosene	2003	3238.63	5738.82	15775.5
Afr	Urban	Kerosene	2004	31734.8	40493.5	48988.9
Amr	Urban	Kerosene	2004	2332.81	3827.2	9027.29
Emr	Urban	Kerosene	2004	1643.47	4003.64	10740.9
Eur	Urban	Kerosene	2004	72.7768	698.622	4282.13
Sear	Urban	Kerosene	2004	76395.7	102599	128833
Wpr	Urban	Kerosene	2004	2746.12	5063.04	13125.8
Afr	Urban	Kerosene	2005	33771.7	41420.8	50030.6
Amr	Urban	Kerosene	2005	1973.77	3181.66	7806.58
Emr	Urban	Kerosene	2005	1407.01	3713.82	10098.5
Eur	Urban	Kerosene	2005	78.2546	598.137	4286.83
Sear	Urban	Kerosene	2005	71489.6	95475.5	121717
Wpr	Urban	Kerosene	2005	2216.25	4599.43	13622.4
Afr	Urban	Kerosene	2006	35197.5	42641.3	51821.2
Amr	Urban	Kerosene	2006	1458.35	2639.82	7512.58
Emr	Urban	Kerosene	2006	1319.5	3302.57	10135.1
Eur	Urban	Kerosene	2006	80.8361	544.404	3923.94
Sear	Urban	Kerosene	2006	63155.7	87476.3	113622
Wpr	Urban	Kerosene	2006	1844.83	4061.58	14444.2
Afr	Urban	Kerosene	2007	35099.9	44365.9	52429
Amr	Urban	Kerosene	2007	1131.03	2270.83	6823.26
Emr	Urban	Kerosene	2007	1258.42	3194.43	8987.42
Eur	Urban	Kerosene	2007	58.8529	503.293	4556.83
Sear	Urban	Kerosene	2007	54250.7	77460.8	103072
Wpr	Urban	Kerosene	2007	1550.85	3529.59	13869
Afr	Urban	Kerosene	2008	37825.3	45637	54722.4
Amr	Urban	Kerosene	2008	969.967	1955.55	6541.92
Emr	Urban	Kerosene	2008	1268.38	2991.55	9418.67
Eur	Urban	Kerosene	2008	57.2442	532.126	4709.57
Sear	Urban	Kerosene	2008	43813.9	68199.3	96570.9
Wpr	Urban	Kerosene	2008	1339.19	3188.5	17430.9
Afr	Urban	Kerosene	2009	38309	46852.8	55737.5
Amr	Urban	Kerosene	2009	780.381	1725.39	6742.99
Emr	Urban	Kerosene	2009	1180.72	2919.34	8845.59
Eur	Urban	Kerosene	2009	70.8076	541.761	5363.82
Sear	Urban	Kerosene	2009	36223.5	58048.6	88998.8
Wpr	Urban	Kerosene	2009	1216.72	2961.93	15292.7
Afr	Urban	Kerosene	2010	38693.6	48032.8	57463.7
Amr	Urban	Kerosene	2010	682.562	1502.69	6225.59
Emr	Urban	Kerosene	2010	1113.47	2740.79	8606.69
Eur	Urban	Kerosene	2010	56.0299	573.922	4885.58
Sear	Urban	Kerosene	2010	29962.5	49599.7	77540.4
Wpr	Urban	Kerosene	2010	1053.4	2644.91	19189.1
Afr	Urban	Kerosene	2011	39980.6	49064.4	58981.4
Amr	Urban	Kerosene	2011	637.987	1403.84	6726.98
Emr	Urban	Kerosene	2011	1081.74	2683.54	9439.47
Eur	Urban	Kerosene	2011	61.7808	582.044	5153.96
Sear	Urban	Kerosene	2011	21361.2	41949.7	67378.2
Wpr	Urban	Kerosene	2011	935.464	2542.96	17269.5
Afr	Urban	Kerosene	2012	39937.9	49269.7	58989.8
Amr	Urban	Kerosene	2012	570.649	1395.85	6443.07
Emr	Urban	Kerosene	2012	1023.87	2748.33	10518.8
Eur	Urban	Kerosene	2012	65.269	610.293	6085.24
Sear	Urban	Kerosene	2012	17589.2	35601.9	61349
Wpr	Urban	Kerosene	2012	844.979	2358.87	18070.6
Afr	Urban	Kerosene	2013	39215.2	49511.2	60266.1
Amr	Urban	Kerosene	2013	551.715	1383.41	6267.31
Emr	Urban	Kerosene	2013	1015.53	2595.34	10267.6
Eur	Urban	Kerosene	2013	56.5283	653.07	6128.33
Sear	Urban	Kerosene	2013	13958.9	30132.4	59204.1
Wpr	Urban	Kerosene	2013	715.644	2194.75	14346.4
Afr	Urban	Kerosene	2014	38546.9	48917.1	58986.1
Amr	Urban	Kerosene	2014	490.576	1376.12	6297
Emr	Urban	Kerosene	2014	1008.96	2609.9	9849.03
Eur	Urban	Kerosene	2014	73.2784	687.199	7973.23
Sear	Urban	Kerosene	2014	9467.86	26340.3	51514.5
Wpr	Urban	Kerosene	2014	753.884	2224.82	22565.9
Afr	Urban	Kerosene	2015	36515.7	46696.4	57407.9
Amr	Urban	Kerosene	2015	491.509	1405.2	7048.5
Emr	Urban	Kerosene	2015	974.023	2830.21	11113.5
Eur	Urban	Kerosene	2015	58.4409	731.295	6584.96
Sear	Urban	Kerosene	2015	9801.54	23517.2	49619
Wpr	Urban	Kerosene	2015	692.303	2205.77	17335.8
Afr	Urban	Kerosene	2016	34691.4	43960	54815.7
Amr	Urban	Kerosene	2016	512.269	1458.77	7442.94
Emr	Urban	Kerosene	2016	952.742	2636.07	12033.5
Eur	Urban	Kerosene	2016	78.7261	818.204	9985.22
Sear	Urban	Kerosene	2016	6630.96	20544.5	48087.5
Wpr	Urban	Kerosene	2016	618.08	2152.2	21280
Afr	Urban	Kerosene	2017	30812.5	40582.8	50874.1
Amr	Urban	Kerosene	2017	535.022	1601.34	6747.21
Emr	Urban	Kerosene	2017	994.999	2894.7	14331.4
Eur	Urban	Kerosene	2017	72.3619	786.972	11075.3
Sear	Urban	Kerosene	2017	5745.11	18709.6	43113
Wpr	Urban	Kerosene	2017	568.378	2033.11	24129.8
Afr	Urban	Kerosene	2018	26644.8	36472.2	48265.2
Amr	Urban	Kerosene	2018	523.832	1712.52	7108.83
Emr	Urban	Kerosene	2018	978.208	2997.04	14190.6
Eur	Urban	Kerosene	2018	78.703	975.678	12572.4
Sear	Urban	Kerosene	2018	4270.99	16953.4	44202.3
Wpr	Urban	Kerosene	2018	573.058	2029.27	28215.4
Afr	Urban	Kerosene	2019	22617.4	32037.3	43663.1
Amr	Urban	Kerosene	2019	594.942	1861.51	7716.33
Emr	Urban	Kerosene	2019	948.203	3265.77	16546.7
Eur	Urban	Kerosene	2019	92.5042	973.376	13440.9
Sear	Urban	Kerosene	2019	3455.38	15250.1	44413.2
Wpr	Urban	Kerosene	2019	474.638	2131.93	32747
Afr	Urban	Kerosene	2020	18687.4	27987.1	38330.7
Amr	Urban	Kerosene	2020	628.981	2020.14	8196.44
Emr	Urban	Kerosene	2020	968.401	3251.48	17642.5
Eur	Urban	Kerosene	2020	142.124	1150.71	14778.8
Sear	Urban	Kerosene	2020	2727.7	14371.3	44647.3
Wpr	Urban	Kerosene	2020	470.085	2071.42	26968.1
Afr	Urban	Kerosene	2021	15886.7	24400	35567.1
Amr	Urban	Kerosene	2021	661.019	2324.76	8774.51
Emr	Urban	Kerosene	2021	961.19	3454.25	20139.7
Eur	Urban	Kerosene	2021	122.984	1240.35	21260.5
Sear	Urban	Kerosene	2021	2042.65	13076.9	43916.5
Wpr	Urban	Kerosene	2021	512.86	2214.36	29678.1
Afr	Urban	Kerosene	2022	12870.6	21566.3	33967.6
Amr	Urban	Kerosene	2022	738.801	2603.06	9010.29
Emr	Urban	Kerosene	2022	990.848	3703.07	21295.3
Eur	Urban	Kerosene	2022	123.123	1368.34	26687.6
Sear	Urban	Kerosene	2022	1626.6	12361.9	47773.3
Wpr	Urban	Kerosene	2022	486.942	2277.98	40439.3
Afr	Urban	Kerosene	2023	11318.8	19103.4	31759.7
Amr	Urban	Kerosene	2023	694.84	3039.14	10869.1
Emr	Urban	Kerosene	2023	895.336	4147.19	28579.8
Eur	Urban	Kerosene	2023	154.162	1569.97	27646.2
Sear	Urban	Kerosene	2023	991.111	10741	48561.6
Wpr	Urban	Kerosene	2023	459.928	2325.51	39605.4
Afr	Urban	Kerosene	2024	10069.6	17958.4	32825.9
Amr	Urban	Kerosene	2024	798.393	3142.35	11404.2
Emr	Urban	Kerosene	2024	1098.89	4293.83	29571.7
Eur	Urban	Kerosene	2024	164.342	1847.76	33866.5
Sear	Urban	Kerosene	2024	845.308	10147.2	48644.2
Wpr	Urban	Kerosene	2024	487.238	2459.44	45454.1
Afr	Urban	Kerosene	2025	8665.78	16920.3	32402.5
Amr	Urban	Kerosene	2025	913.933	3720.58	13032.8
Emr	Urban	Kerosene	2025	1096.95	4757.65	33432.8
Eur	Urban	Kerosene	2025	178.894	1893.9	39501.4
Sear	Urban	Kerosene	2025	918.259	10052.9	50755
Wpr	Urban	Kerosene	2025	413.788	2539.06	49781.3
Afr	Urban	Kerosene	2026	8070.6	16625	34789.3
Amr	Urban	Kerosene	2026	963.972	4122.53	14638.2
Emr	Urban	Kerosene	2026	1171.79	5228.22	34900.7
Eur	Urban	Kerosene	2026	218.788	2126.55	44178.1
Sear	Urban	Kerosene	2026	710.997	9344.73	57457.3
Wpr	Urban	Kerosene	2026	450.509	2687.62	60600.4
Afr	Urban	Kerosene	2027	7980.22	16702	39368.9
Amr	Urban	Kerosene	2027	1056.13	4601.57	16425
Emr	Urban	Kerosene	2027	1086.03	5942.4	42414.3
Eur	Urban	Kerosene	2027	213.612	2461.99	48488.4
Sear	Urban	Kerosene	2027	562.586	9220	56595.1
Wpr	Urban	Kerosene	2027	457.712	2676.85	62356.8
Afr	Urban	Kerosene	2028	7490.62	16922.3	41544.1
Amr	Urban	Kerosene	2028	1103.81	5182.14	18950.7
Emr	Urban	Kerosene	2028	1216.11	6159.92	44226.7
Eur	Urban	Kerosene	2028	250.148	2741.48	51593
Sear	Urban	Kerosene	2028	598.329	8474.79	59886
Wpr	Urban	Kerosene	2028	436.964	2836.33	78537.3
Afr	Urban	Kerosene	2029	7208.88	17464.9	46922.8
Amr	Urban	Kerosene	2029	1207.12	5558.95	21156.9
Emr	Urban	Kerosene	2029	1213.14	6930.9	49628.5
Eur	Urban	Kerosene	2029	280.172	3109.69	57057.4
Sear	Urban	Kerosene	2029	478.596	8182.24	72672.3
Wpr	Urban	Kerosene	2029	478.16	3060.46	106203
Afr	Urban	Kerosene	2030	7440.02	17692.8	50462.2
Amr	Urban	Kerosene	2030	1315.76	6239.14	23007
Emr	Urban	Kerosene	2030	1252.48	7982.65	55669.5
Eur	Urban	Kerosene	2030	264.613	3478.57	65334.3
Sear	Urban	Kerosene	2030	448.061	7436.85	66687.8
Wpr	Urban	Kerosene	2030	468.401	3342.58	133894
Afr	Urban	Gas	1990	17946.3	25080.7	31999.2
Amr	Urban	Gas	1990	218125	235720	248316
Emr	Urban	Gas	1990	80197.2	100151	116647
Eur	Urban	Gas	1990	112249	160192	199574
Sear	Urban	Gas	1990	66458.2	90005.3	116132
Wpr	Urban	Gas	1990	69900.6	216968	310374
Afr	Urban	Gas	1991	19460.3	26314.8	33021.4
Amr	Urban	Gas	1991	229205	245499	256102
Emr	Urban	Gas	1991	84596.4	105683	120566
Eur	Urban	Gas	1991	120084	166289	201032
Sear	Urban	Gas	1991	72056	96354.7	123529
Wpr	Urban	Gas	1991	80872.1	225409	323869
Afr	Urban	Gas	1992	20573.8	27645	33341.9
Amr	Urban	Gas	1992	239276	254563	265533
Emr	Urban	Gas	1992	90269.5	110554	123777
Eur	Urban	Gas	1992	125963	170183	203714
Sear	Urban	Gas	1992	80796.7	104221	132192
Wpr	Urban	Gas	1992	104866	238245	336800
Afr	Urban	Gas	1993	22704.5	28891.8	33744.1
Amr	Urban	Gas	1993	248030	263937	273582
Emr	Urban	Gas	1993	97798.2	115375	128686
Eur	Urban	Gas	1993	134573	173253	204277
Sear	Urban	Gas	1993	87634.2	112910	138538
Wpr	Urban	Gas	1993	115525	249362	347223
Afr	Urban	Gas	1994	24842	30299.4	34977.1
Amr	Urban	Gas	1994	257229	272787	282557
Emr	Urban	Gas	1994	103502	120828	131912
Eur	Urban	Gas	1994	142935	177379	204721
Sear	Urban	Gas	1994	92338.8	120161	150335
Wpr	Urban	Gas	1994	136601	262060	360225
Afr	Urban	Gas	1995	26344.1	31553.4	35643.7
Amr	Urban	Gas	1995	266687	282313	290795
Emr	Urban	Gas	1995	110475	125644	136604
Eur	Urban	Gas	1995	150020	181329	206833
Sear	Urban	Gas	1995	103100	129717	161228
Wpr	Urban	Gas	1995	155946	275432	374582
Afr	Urban	Gas	1996	27879	32950.2	36835.7
Amr	Urban	Gas	1996	278292	291690	299948
Emr	Urban	Gas	1996	116187	131088	141436
Eur	Urban	Gas	1996	157469	184778	206801
Sear	Urban	Gas	1996	108120	138845	170156
Wpr	Urban	Gas	1996	172526	286191	381754
Afr	Urban	Gas	1997	30093.5	34482	38162.2
Amr	Urban	Gas	1997	286926	300373	308865
Emr	Urban	Gas	1997	121594	136213	146328
Eur	Urban	Gas	1997	164010	188370	208429
Sear	Urban	Gas	1997	118360	148850	181983
Wpr	Urban	Gas	1997	186867	299399	400582
Afr	Urban	Gas	1998	31938.6	35828	39338.8
Amr	Urban	Gas	1998	294086	309525	318074
Emr	Urban	Gas	1998	127238	141572	150761
Eur	Urban	Gas	1998	171552	192357	208761
Sear	Urban	Gas	1998	129973	161413	192022
Wpr	Urban	Gas	1998	211774	311967	402645
Afr	Urban	Gas	1999	33176.2	37473.8	40833.4
Amr	Urban	Gas	1999	305318	318834	326652
Emr	Urban	Gas	1999	135150	146957	155772
Eur	Urban	Gas	1999	174269	194871	211778
Sear	Urban	Gas	1999	140628	172304	205812
Wpr	Urban	Gas	1999	230389	329799	414569
Afr	Urban	Gas	2000	35709.1	39113.7	42428.9
Amr	Urban	Gas	2000	312405	327376	335218
Emr	Urban	Gas	2000	140558	152592	160652
Eur	Urban	Gas	2000	179745	198226	212488
Sear	Urban	Gas	2000	149622	184882	220886
Wpr	Urban	Gas	2000	251383	341600	431369
Afr	Urban	Gas	2001	36759.9	40939.5	44378.7
Amr	Urban	Gas	2001	320520	335953	343478
Emr	Urban	Gas	2001	145624	157918	165882
Eur	Urban	Gas	2001	183916	201065	215649
Sear	Urban	Gas	2001	161034	200280	235632
Wpr	Urban	Gas	2001	255634	360967	447379
Afr	Urban	Gas	2002	39390	42823.6	45795.5
Amr	Urban	Gas	2002	328646	344120	352067
Emr	Urban	Gas	2002	152993	164002	171533
Eur	Urban	Gas	2002	187861	204293	216260
Sear	Urban	Gas	2002	175715	213481	254742
Wpr	Urban	Gas	2002	273094	379111	465960
Afr	Urban	Gas	2003	41315.3	44770.3	47948.3
Amr	Urban	Gas	2003	336228	351268	358782
Emr	Urban	Gas	2003	158643	169450	176898
Eur	Urban	Gas	2003	188738	206799	218752
Sear	Urban	Gas	2003	189004	229516	270869
Wpr	Urban	Gas	2003	298512	397332	487754
Afr	Urban	Gas	2004	43224.6	46920.3	50626.3
Amr	Urban	Gas	2004	345622	359205	367331
Emr	Urban	Gas	2004	165160	175361	183467
Eur	Urban	Gas	2004	191643	209549	221012
Sear	Urban	Gas	2004	207779	246195	288282
Wpr	Urban	Gas	2004	319178	412809	515366
Afr	Urban	Gas	2005	45557.7	49287	52665.2
Amr	Urban	Gas	2005	352369	366670	373753
Emr	Urban	Gas	2005	172556	181670	189307
Eur	Urban	Gas	2005	195233	211494	222424
Sear	Urban	Gas	2005	217748	266059	308521
Wpr	Urban	Gas	2005	318281	433304	526964
Afr	Urban	Gas	2006	47828.1	51537.9	55161.1
Amr	Urban	Gas	2006	358587	373827	381051
Emr	Urban	Gas	2006	177887	188638	195915
Eur	Urban	Gas	2006	196037	212629	224699
Sear	Urban	Gas	2006	242623	285509	325175
Wpr	Urban	Gas	2006	342145	447432	551492
Afr	Urban	Gas	2007	50355.4	54067.4	57729.5
Amr	Urban	Gas	2007	366017	381117	388244
Emr	Urban	Gas	2007	185418	195279	202184
Eur	Urban	Gas	2007	196955	214868	227078
Sear	Urban	Gas	2007	264848	308847	355476
Wpr	Urban	Gas	2007	356250	467611	568747
Afr	Urban	Gas	2008	52480.5	56809.6	60894.1
Amr	Urban	Gas	2008	374882	388302	395685
Emr	Urban	Gas	2008	191713	201726	208689
Eur	Urban	Gas	2008	195747	216132	228341
Sear	Urban	Gas	2008	283417	332617	378532
Wpr	Urban	Gas	2008	361209	478797	584046
Afr	Urban	Gas	2009	55147.8	59564.2	63602.2
Amr	Urban	Gas	2009	381469	395277	402577
Emr	Urban	Gas	2009	199346	208694	215751
Eur	Urban	Gas	2009	197541	216815	231408
Sear	Urban	Gas	2009	301886	355721	400504
Wpr	Urban	Gas	2009	376302	495965	599666
Afr	Urban	Gas	2010	57797.1	62626.8	67241.8
Amr	Urban	Gas	2010	387443	402117	409043
Emr	Urban	Gas	2010	205808	215479	222895
Eur	Urban	Gas	2010	196271	218561	232009
Sear	Urban	Gas	2010	328108	381149	427747
Wpr	Urban	Gas	2010	381245	512409	623127
Afr	Urban	Gas	2011	61042.7	65849.5	70698.8
Amr	Urban	Gas	2011	394018	408432	416039
Emr	Urban	Gas	2011	211097	221609	228547
Eur	Urban	Gas	2011	198059	218712	234251
Sear	Urban	Gas	2011	350564	403813	451587
Wpr	Urban	Gas	2011	388483	522071	629960
Afr	Urban	Gas	2012	64641.9	69573.2	74781.8
Amr	Urban	Gas	2012	401268	415219	423016
Emr	Urban	Gas	2012	216332	227821	235014
Eur	Urban	Gas	2012	193738	219890	236142
Sear	Urban	Gas	2012	372454	429012	478060
Wpr	Urban	Gas	2012	388801	533807	656391
Afr	Urban	Gas	2013	67864.2	73731.4	79112.5
Amr	Urban	Gas	2013	407854	421652	429433
Emr	Urban	Gas	2013	222317	234235	241573
Eur	Urban	Gas	2013	192333	220588	238115
Sear	Urban	Gas	2013	395874	452689	503724
Wpr	Urban	Gas	2013	394229	542262	668538
Afr	Urban	Gas	2014	72076.1	78459.2	85348.4
Amr	Urban	Gas	2014	414156	427716	435985
Emr	Urban	Gas	2014	227986	240251	247947
Eur	Urban	Gas	2014	188612	220731	239622
Sear	Urban	Gas	2014	416282	478581	527885
Wpr	Urban	Gas	2014	384100	547082	708117
Afr	Urban	Gas	2015	77293.5	83965.4	90499
Amr	Urban	Gas	2015	418978	433961	441796
Emr	Urban	Gas	2015	231529	245909	254371
Eur	Urban	Gas	2015	184019	221975	241785
Sear	Urban	Gas	2015	429558	500687	552356
Wpr	Urban	Gas	2015	364953	547889	717405
Afr	Urban	Gas	2016	83270.1	90313.4	97932.3
Amr	Urban	Gas	2016	422232	439771	448445
Emr	Urban	Gas	2016	236887	251818	261182
Eur	Urban	Gas	2016	182267	221613	242795
Sear	Urban	Gas	2016	443964	520482	580173
Wpr	Urban	Gas	2016	340734	557998	739658
Afr	Urban	Gas	2017	87257.2	97329.5	106397
Amr	Urban	Gas	2017	431494	445438	455313
Emr	Urban	Gas	2017	240260	257698	267270
Eur	Urban	Gas	2017	175398	220825	245567
Sear	Urban	Gas	2017	464863	544627	599492
Wpr	Urban	Gas	2017	328932	552728	757974
Afr	Urban	Gas	2018	94586.4	105020	116017
Amr	Urban	Gas	2018	435218	450624	460289
Emr	Urban	Gas	2018	245029	263656	273833
Eur	Urban	Gas	2018	171773	219915	247367
Sear	Urban	Gas	2018	477636	563210	625174
Wpr	Urban	Gas	2018	284975	546044	788689
Afr	Urban	Gas	2019	99668.9	113420	126241
Amr	Urban	Gas	2019	437569	456187	466486
Emr	Urban	Gas	2019	245588	268452	280529
Eur	Urban	Gas	2019	164727	217587	249035
Sear	Urban	Gas	2019	483674	585033	649777
Wpr	Urban	Gas	2019	265365	540477	807824
Afr	Urban	Gas	2020	106856	121009	136492
Amr	Urban	Gas	2020	440933	460544	471869
Emr	Urban	Gas	2020	247231	274258	286634
Eur	Urban	Gas	2020	163884	215792	250177
Sear	Urban	Gas	2020	499534	603685	669969
Wpr	Urban	Gas	2020	220013	536100	832182
Afr	Urban	Gas	2021	111233	128552	147868
Amr	Urban	Gas	2021	444152	465104	477283
Emr	Urban	Gas	2021	250329	279564	294494
Eur	Urban	Gas	2021	158608	213317	250426
Sear	Urban	Gas	2021	506369	623597	693314
Wpr	Urban	Gas	2021	193566	526515	847540
Afr	Urban	Gas	2022	115963	135346	155892
Amr	Urban	Gas	2022	447163	469370	483777
Emr	Urban	Gas	2022	249456	284593	300158
Eur	Urban	Gas	2022	150201	212753	249867
Sear	Urban	Gas	2022	514040	641538	715483
Wpr	Urban	Gas	2022	179786	507761	887588
Afr	Urban	Gas	2023	120142	141691	164754
Amr	Urban	Gas	2023	446630	472938	487938
Emr	Urban	Gas	2023	249935	289775	307307
Eur	Urban	Gas	2023	147766	209244	252196
Sear	Urban	Gas	2023	512556	660616	736692
Wpr	Urban	Gas	2023	156702	502013	911697
Afr	Urban	Gas	2024	124226	147660	175837
Amr	Urban	Gas	2024	450465	476958	493673
Emr	Urban	Gas	2024	250798	294984	315483
Eur	Urban	Gas	2024	144705	205313	251576
Sear	Urban	Gas	2024	513085	679237	754822
Wpr	Urban	Gas	2024	139993	480310	922010
Afr	Urban	Gas	2025	126169	153391	183496
Amr	Urban	Gas	2025	449487	479346	497651
Emr	Urban	Gas	2025	251469	300124	321727
Eur	Urban	Gas	2025	141312	201933	252337
Sear	Urban	Gas	2025	495667	694570	779683
Wpr	Urban	Gas	2025	125236	465019	946639
Afr	Urban	Gas	2026	127337	157469	189299
Amr	Urban	Gas	2026	449075	482026	502796
Emr	Urban	Gas	2026	251234	304107	328238
Eur	Urban	Gas	2026	138215	199698	252494
Sear	Urban	Gas	2026	505006	709720	803029
Wpr	Urban	Gas	2026	119189	448304	953404
Afr	Urban	Gas	2027	127423	161508	196528
Amr	Urban	Gas	2027	445811	485722	507103
Emr	Urban	Gas	2027	250405	309073	334004
Eur	Urban	Gas	2027	137773	196236	252641
Sear	Urban	Gas	2027	476979	724237	822544
Wpr	Urban	Gas	2027	115103	428438	994922
Afr	Urban	Gas	2028	130614	165759	204374
Amr	Urban	Gas	2028	441172	487190	511780
Emr	Urban	Gas	2028	252306	312400	342215
Eur	Urban	Gas	2028	133108	192219	253833
Sear	Urban	Gas	2028	466944	741863	846714
Wpr	Urban	Gas	2028	99157.2	410632	1.01752e+06
Afr	Urban	Gas	2029	128498	168883	213867
Amr	Urban	Gas	2029	439050	488458	515195
Emr	Urban	Gas	2029	249905	316162	349633
Eur	Urban	Gas	2029	130883	185494	254350
Sear	Urban	Gas	2029	453618	749085	865420
Wpr	Urban	Gas	2029	101769	388682	1.0147e+06
Afr	Urban	Gas	2030	131748	171829	220725
Amr	Urban	Gas	2030	434239	489480	519354
Emr	Urban	Gas	2030	250874	319367	355493
Eur	Urban	Gas	2030	127504	183325	253598
Sear	Urban	Gas	2030	426907	767550	888354
Wpr	Urban	Gas	2030	92155.7	369706	1.03367e+06
Afr	Urban	Electricity	1990	15553.1	20783.5	28390.5
Amr	Urban	Electricity	1990	11036.6	14306.9	20493.3
Emr	Urban	Electricity	1990	429.645	2442.32	10273.8
Eur	Urban	Electricity	1990	23144.6	58144.1	104506
Sear	Urban	Electricity	1990	1917.95	4785.74	10557.5
Wpr	Urban	Electricity	1990	1582.63	5151.35	43157.9
Afr	Urban	Electricity	1991	16878.1	21550.6	29170.5
Amr	Urban	Electricity	1991	10895.4	14075.7	19735
Emr	Urban	Electricity	1991	430.191	2352.54	10054.6
Eur	Urban	Electricity	1991	23931.7	56043.4	101370
Sear	Urban	Electricity	1991	1986.48	4689.65	9884.45
Wpr	Urban	Electricity	1991	1827.6	5378.11	40087.2
Afr	Urban	Electricity	1992	17252	22313.6	29849.4
Amr	Urban	Electricity	1992	10886.9	14080.1	19945.4
Emr	Urban	Electricity	1992	494.397	2193.22	9334.81
Eur	Urban	Electricity	1992	23355.9	55239.8	96195.7
Sear	Urban	Electricity	1992	1909.45	4517.48	10127.1
Wpr	Urban	Electricity	1992	1806.78	5831.6	37305.4
Afr	Urban	Electricity	1993	18565	23177.7	30026.3
Amr	Urban	Electricity	1993	10529.1	13781.3	19586.1
Emr	Urban	Electricity	1993	561.692	2237.55	8573.15
Eur	Urban	Electricity	1993	26183.9	53909.2	89708.8
Sear	Urban	Electricity	1993	1974.8	4558.92	9559.73
Wpr	Urban	Electricity	1993	1852.54	6286.85	42333.5
Afr	Urban	Electricity	1994	18846.1	23794.2	31310.9
Amr	Urban	Electricity	1994	10319.8	13563	18628
Emr	Urban	Electricity	1994	534.95	2220	7603.06
Eur	Urban	Electricity	1994	27080	51884	85164.2
Sear	Urban	Electricity	1994	1827.15	4421.58	9437.39
Wpr	Urban	Electricity	1994	1976.43	6559.48	33475.9
Afr	Urban	Electricity	1995	19359.3	24553.4	31721.2
Amr	Urban	Electricity	1995	9977.72	13356.4	18527.1
Emr	Urban	Electricity	1995	566.282	2212.48	7196.34
Eur	Urban	Electricity	1995	27219.3	50264.5	76885
Sear	Urban	Electricity	1995	1770.19	4221.91	9393.63
Wpr	Urban	Electricity	1995	1973	7201.17	36362.6
Afr	Urban	Electricity	1996	20206.1	25340.8	32397.6
Amr	Urban	Electricity	1996	9502.36	12882.2	18377.1
Emr	Urban	Electricity	1996	597.914	2242.1	6334.78
Eur	Urban	Electricity	1996	27320.3	48425.9	74618
Sear	Urban	Electricity	1996	1762.96	4218.04	9054.96
Wpr	Urban	Electricity	1996	2051.73	8235.46	39229.4
Afr	Urban	Electricity	1997	20930.9	25971.3	32617.5
Amr	Urban	Electricity	1997	9090.34	12495.1	18653.6
Emr	Urban	Electricity	1997	538.15	2145.71	6753.26
Eur	Urban	Electricity	1997	27216	46086.4	69394.9
Sear	Urban	Electricity	1997	1828.22	4306.95	8417.48
Wpr	Urban	Electricity	1997	1976.47	8633.14	39112
Afr	Urban	Electricity	1998	21901.1	27023	33483.6
Amr	Urban	Electricity	1998	8748.79	11992.5	18989.4
Emr	Urban	Electricity	1998	597.515	1971.98	6171.88
Eur	Urban	Electricity	1998	28089.8	42991.7	64275.8
Sear	Urban	Electricity	1998	1849.53	4072.98	8881.03
Wpr	Urban	Electricity	1998	2253.75	9794.03	48320.6
Afr	Urban	Electricity	1999	22451.4	27775.4	33586.1
Amr	Urban	Electricity	1999	8475.57	11620.1	18555.1
Emr	Urban	Electricity	1999	553.626	2031.68	6176.05
Eur	Urban	Electricity	1999	26533.3	41666.7	60208.5
Sear	Urban	Electricity	1999	1732.39	4153.28	8548.25
Wpr	Urban	Electricity	1999	2589.88	11460.1	41775.7
Afr	Urban	Electricity	2000	23022.6	28546.8	34266.8
Amr	Urban	Electricity	2000	8000.5	11131.4	16878.6
Emr	Urban	Electricity	2000	595.695	2027.58	5933.99
Eur	Urban	Electricity	2000	26216.9	39777	57944.4
Sear	Urban	Electricity	2000	1658.95	4076.54	9711.45
Wpr	Urban	Electricity	2000	2758.71	12305.8	46707.1
Afr	Urban	Electricity	2001	24424.2	29549.5	35265.9
Amr	Urban	Electricity	2001	7725.39	10915.8	16915.6
Emr	Urban	Electricity	2001	614.425	2002.89	5540.47
Eur	Urban	Electricity	2001	23871.5	37634.3	52454.8
Sear	Urban	Electricity	2001	1890.3	4335.58	9217.32
Wpr	Urban	Electricity	2001	3174.07	13633.2	50211.6
Afr	Urban	Electricity	2002	25583.3	30664.6	35696.5
Amr	Urban	Electricity	2002	7451.39	10431.9	16515.6
Emr	Urban	Electricity	2002	644.011	1883.39	5922.05
Eur	Urban	Electricity	2002	24114.4	35720.7	51192
Sear	Urban	Electricity	2002	2022.66	4476.78	10075.1
Wpr	Urban	Electricity	2002	3473.85	15617.1	54051.6
Afr	Urban	Electricity	2003	26236.3	31656.7	36786.9
Amr	Urban	Electricity	2003	7392.37	10209.3	16822.3
Emr	Urban	Electricity	2003	659.219	1935.77	5326.79
Eur	Urban	Electricity	2003	23302.2	34172.9	49831.7
Sear	Urban	Electricity	2003	2185.33	4788.59	10167.6
Wpr	Urban	Electricity	2003	4167.87	18342.7	63619.1
Afr	Urban	Electricity	2004	27442.5	32841.6	38380.2
Amr	Urban	Electricity	2004	6894.67	10032.9	16113.2
Emr	Urban	Electricity	2004	594.258	1899.92	5393.54
Eur	Urban	Electricity	2004	22497	32867.3	47876.1
Sear	Urban	Electricity	2004	2333.44	5063.41	11252.7
Wpr	Urban	Electricity	2004	5158.68	22644.9	78803.2
Afr	Urban	Electricity	2005	28406.9	34042.3	38980.9
Amr	Urban	Electricity	2005	6787.87	9947.27	16229
Emr	Urban	Electricity	2005	645.031	1879.17	5278.12
Eur	Urban	Electricity	2005	22181.2	32677.2	46791.5
Sear	Urban	Electricity	2005	2636.26	5578.21	12097.1
Wpr	Urban	Electricity	2005	5586.28	26256.9	77624.5
Afr	Urban	Electricity	2006	30157.6	35207.5	40140.5
Amr	Urban	Electricity	2006	6901.82	9721.43	16617.7
Emr	Urban	Electricity	2006	677.136	1920.6	6013.76
Eur	Urban	Electricity	2006	21350.6	32377.5	45353.1
Sear	Urban	Electricity	2006	3083.82	6102.81	12585.6
Wpr	Urban	Electricity	2006	7557.15	31649.2	87608.3
Afr	Urban	Electricity	2007	31253.3	36359.8	41273.6
Amr	Urban	Electricity	2007	6643.99	9684.84	15881.3
Emr	Urban	Electricity	2007	687.224	1948.31	5803.76
Eur	Urban	Electricity	2007	20427.8	31394	47597.7
Sear	Urban	Electricity	2007	3245.08	6792.04	14063.4
Wpr	Urban	Electricity	2007	9262.8	38973.4	104552
Afr	Urban	Electricity	2008	32466.5	37561	42266.9
Amr	Urban	Electricity	2008	6800.43	9681.93	15992.6
Emr	Urban	Electricity	2008	650.558	2071.32	5657.69
Eur	Urban	Electricity	2008	21046.4	31236	45710.9
Sear	Urban	Electricity	2008	3426.92	7356.49	16076.1
Wpr	Urban	Electricity	2008	11799.2	48032.4	124007
Afr	Urban	Electricity	2009	34023.9	39084.8	44080.1
Amr	Urban	Electricity	2009	6684.97	9615.63	15962
Emr	Urban	Electricity	2009	707.833	2078.58	5625.86
Eur	Urban	Electricity	2009	19288	31678.2	47022.3
Sear	Urban	Electricity	2009	4107.98	8031.13	17386.1
Wpr	Urban	Electricity	2009	14862.3	54509.6	130549
Afr	Urban	Electricity	2010	35173.2	40505.6	45427.8
Amr	Urban	Electricity	2010	6845.18	9725.03	15978.3
Emr	Urban	Electricity	2010	771.195	2236.81	6465.27
Eur	Urban	Electricity	2010	20432.1	31798.1	49011.1
Sear	Urban	Electricity	2010	4694.81	8951.4	21567.3
Wpr	Urban	Electricity	2010	18732	65959.6	151910
Afr	Urban	Electricity	2011	37058.4	42042.4	47091.9
Amr	Urban	Electricity	2011	6876.45	9896.38	16587.1
Emr	Urban	Electricity	2011	755.431	2485.32	8062.14
Eur	Urban	Electricity	2011	19384.4	31897.8	48717
Sear	Urban	Electricity	2011	5467.17	9663.52	21527
Wpr	Urban	Electricity	2011	25332.4	79077.3	166627
Afr	Urban	Electricity	2012	38237	43842.8	49669.9
Amr	Urban	Electricity	2012	6895.06	9977.55	16685.2
Emr	Urban	Electricity	2012	856.817	2555.82	7287.93
Eur	Urban	Electricity	2012	18838.1	32626.2	52314.4
Sear	Urban	Electricity	2012	5856.72	10833.3	26418.7
Wpr	Urban	Electricity	2012	27002.2	93811.7	190988
Afr	Urban	Electricity	2013	40121.2	45510.5	51096.7
Amr	Urban	Electricity	2013	6882.77	10262.4	16408.5
Emr	Urban	Electricity	2013	930.152	2803.68	8167.98
Eur	Urban	Electricity	2013	18816	32390	57425.9
Sear	Urban	Electricity	2013	6875.78	12075.4	28076.5
Wpr	Urban	Electricity	2013	30569.8	110841	220477
Afr	Urban	Electricity	2014	41393.1	47528.5	53911.7
Amr	Urban	Electricity	2014	7281.2	10375.2	16749.4
Emr	Urban	Electricity	2014	928.081	3048.84	8736.32
Eur	Urban	Electricity	2014	18845.2	33068	58944.9
Sear	Urban	Electricity	2014	7354.73	13360.3	29820
Wpr	Urban	Electricity	2014	31185.8	126505	246400
Afr	Urban	Electricity	2015	43680.7	49454.4	56183.9
Amr	Urban	Electricity	2015	7282.27	10748.7	17638.9
Emr	Urban	Electricity	2015	1005.33	3367.46	11034.8
Eur	Urban	Electricity	2015	18203.7	32779	62200.3
Sear	Urban	Electricity	2015	8301.94	14784.7	36019.7
Wpr	Urban	Electricity	2015	37186.1	142466	300388
Afr	Urban	Electricity	2016	45580	51628.1	59073
Amr	Urban	Electricity	2016	7413.29	10935.1	17568.5
Emr	Urban	Electricity	2016	1078.44	3666.14	11489
Eur	Urban	Electricity	2016	18789	33422.8	69491.4
Sear	Urban	Electricity	2016	8744.97	16130	40532.3
Wpr	Urban	Electricity	2016	38886.5	162303	337261
Afr	Urban	Electricity	2017	46632.1	53568.9	62157.3
Amr	Urban	Electricity	2017	7617.63	11521	18804.6
Emr	Urban	Electricity	2017	1084.01	3838.42	12486.1
Eur	Urban	Electricity	2017	18212.4	33482.8	70269.3
Sear	Urban	Electricity	2017	9778.44	17874.6	46072.3
Wpr	Urban	Electricity	2017	42372.2	178071	377029
Afr	Urban	Electricity	2018	48423.1	55592.2	65854.7
Amr	Urban	Electricity	2018	7722.76	11917.3	19964.7
Emr	Urban	Electricity	2018	1318.27	4323.47	13991
Eur	Urban	Electricity	2018	18231.5	34436.9	75184.4
Sear	Urban	Electricity	2018	10894	20010.7	52102.6
Wpr	Urban	Electricity	2018	35183.5	198149	446117
Afr	Urban	Electricity	2019	49220.2	57604.7	68213.6
Amr	Urban	Electricity	2019	7890.3	12241.3	20278.4
Emr	Urban	Electricity	2019	1271.95	4764.56	15967.6
Eur	Urban	Electricity	2019	18024.3	34526	80379.5
Sear	Urban	Electricity	2019	11478.6	21554.8	64128.3
Wpr	Urban	Electricity	2019	44254	219082	512789
Afr	Urban	Electricity	2020	50499.6	59445.3	72580.7
Amr	Urban	Electricity	2020	8182.12	12841.5	21544.9
Emr	Urban	Electricity	2020	1493.21	5548.15	17946.2
Eur	Urban	Electricity	2020	18160.1	34407.2	81633.1
Sear	Urban	Electricity	2020	11959.8	23502.7	73969.2
Wpr	Urban	Electricity	2020	41738.4	246588	564530
Afr	Urban	Electricity	2021	51555.9	61188.1	75611.8
Amr	Urban	Electricity	2021	8690.65	13440	22089
Emr	Urban	Electricity	2021	1652.23	6088.52	22946.8
Eur	Urban	Electricity	2021	18006	35103.8	88430.6
Sear	Urban	Electricity	2021	13964.9	26574.8	84780.7
Wpr	Urban	Electricity	2021	31392	258025	622974
Afr	Urban	Electricity	2022	52826.1	63372	78639.5
Amr	Urban	Electricity	2022	8669.07	14111.8	24755.1
Emr	Urban	Electricity	2022	1625.3	6817.97	26167.3
Eur	Urban	Electricity	2022	18235.9	35102.7	90888.2
Sear	Urban	Electricity	2022	14022.5	27496.7	100774
Wpr	Urban	Electricity	2022	30095.5	290893	664150
Afr	Urban	Electricity	2023	53223.7	65531	83390
Amr	Urban	Electricity	2023	9200.71	14636.2	25112.9
Emr	Urban	Electricity	2023	1872.55	7536.61	29821.7
Eur	Urban	Electricity	2023	17766	35216.7	93714.1
Sear	Urban	Electricity	2023	14906.8	30631.1	123916
Wpr	Urban	Electricity	2023	31417	313656	698226
Afr	Urban	Electricity	2024	53804.5	67431.3	87936.1
Amr	Urban	Electricity	2024	9413.39	15134	27817.5
Emr	Urban	Electricity	2024	2145.1	8578.84	33265.5
Eur	Urban	Electricity	2024	18155.2	36364.8	94752
Sear	Urban	Electricity	2024	15255.1	33317	155560
Wpr	Urban	Electricity	2024	37478.8	336852	768229
Afr	Urban	Electricity	2025	54453.4	69983.5	91817.4
Amr	Urban	Electricity	2025	9591.4	16311.6	29170.4
Emr	Urban	Electricity	2025	2214.82	9916.58	37194.8
Eur	Urban	Electricity	2025	17424.2	36639.2	103060
Sear	Urban	Electricity	2025	15532.6	36810.2	178516
Wpr	Urban	Electricity	2025	36724.7	351280	802940
Afr	Urban	Electricity	2026	55618.1	72490.6	94832.7
Amr	Urban	Electricity	2026	9244.52	16479.8	31546.6
Emr	Urban	Electricity	2026	2248.05	11087.5	43139.2
Eur	Urban	Electricity	2026	17713	37694.5	105651
Sear	Urban	Electricity	2026	16684.3	38719.9	221542
Wpr	Urban	Electricity	2026	35469	375363	829641
Afr	Urban	Electricity	2027	55007.9	75358.1	101445
Amr	Urban	Electricity	2027	10092	17528.3	33338.5
Emr	Urban	Electricity	2027	2699.63	12111.3	49658.1
Eur	Urban	Electricity	2027	16619.6	37545.4	108354
Sear	Urban	Electricity	2027	16445.9	41242	252136
Wpr	Urban	Electricity	2027	27651.9	403636	860625
Afr	Urban	Electricity	2028	55518.4	77674.3	104153
Amr	Urban	Electricity	2028	10060.8	18460.2	36264.2
Emr	Urban	Electricity	2028	2627.73	13683.6	54164.1
Eur	Urban	Electricity	2028	17518.3	37092.2	108946
Sear	Urban	Electricity	2028	16895.3	45637.3	306562
Wpr	Urban	Electricity	2028	27358	412381	913460
Afr	Urban	Electricity	2029	55950.2	80461.3	110917
Amr	Urban	Electricity	2029	10124.1	19246.7	39463.6
Emr	Urban	Electricity	2029	2777.43	14969.3	58573.7
Eur	Urban	Electricity	2029	17170.9	38525	113553
Sear	Urban	Electricity	2029	17932.7	48869.3	346189
Wpr	Urban	Electricity	2029	32533.1	429446	924364
Afr	Urban	Electricity	2030	57186.8	84360.6	114637
Amr	Urban	Electricity	2030	11219.3	20219.1	39795.5
Emr	Urban	Electricity	2030	3452.92	16914.8	65159.2
Eur	Urban	Electricity	2030	17276.5	38819.7	115166
Sear	Urban	Electricity	2030	18067.6	51541	387429
Wpr	Urban	Electricity	2030	27676	451056	957945
Afr	Rural	Biomass	1990	269078	304781	322596
Amr	Rural	Biomass	1990	69027.9	80902	91271.9
Emr	Rural	Biomass	1990	87566.7	107937	123877
Eur	Rural	Biomass	1990	20660	29905	45188.3
Sear	Rural	Biomass	1990	817617	863726	897886
Wpr	Rural	Biomass	1990	124445	332716	670979
Afr	Rural	Biomass	1991	282624	313230	330513
Amr	Rural	Biomass	1991	68250.9	80252.3	90745
Emr	Rural	Biomass	1991	92574.7	110725	125910
Eur	Rural	Biomass	1991	21053.6	29872.2	44585.4
Sear	Rural	Biomass	1991	829092	875263	908784
Wpr	Rural	Biomass	1991	136680	341361	674715
Afr	Rural	Biomass	1992	292888	321832	338232
Amr	Rural	Biomass	1992	68489.4	79389.5	88808.3
Emr	Rural	Biomass	1992	97578.6	113542	128176
Eur	Rural	Biomass	1992	21288.4	29534.9	44019.1
Sear	Rural	Biomass	1992	837991	884971	920621
Wpr	Rural	Biomass	1992	152653	349866	653372
Afr	Rural	Biomass	1993	301955	330908	346439
Amr	Rural	Biomass	1993	68444	78087.9	88205.9
Emr	Rural	Biomass	1993	102302	117083	129576
Eur	Rural	Biomass	1993	21746.1	29236.2	42717
Sear	Rural	Biomass	1993	848574	893982	927478
Wpr	Rural	Biomass	1993	161763	353823	625896
Afr	Rural	Biomass	1994	312094	339000	354551
Amr	Rural	Biomass	1994	67488.4	77328.5	86530.2
Emr	Rural	Biomass	1994	106449	120144	132256
Eur	Rural	Biomass	1994	21272.8	29004	42083.9
Sear	Rural	Biomass	1994	851962	903126	939645
Wpr	Rural	Biomass	1994	175612	362868	598743
Afr	Rural	Biomass	1995	323106	347538	361775
Amr	Rural	Biomass	1995	66274	75899.8	84805.2
Emr	Rural	Biomass	1995	110032	122854	134359
Eur	Rural	Biomass	1995	21731.8	28644.6	41853.5
Sear	Rural	Biomass	1995	864320	910654	946708
Wpr	Rural	Biomass	1995	194857	366460	590456
Afr	Rural	Biomass	1996	332405	356489	369968
Amr	Rural	Biomass	1996	65554.3	74602.7	83712.8
Emr	Rural	Biomass	1996	113207	126042	136313
Eur	Rural	Biomass	1996	21261.3	28349.6	39188.4
Sear	Rural	Biomass	1996	864051	918588	956674
Wpr	Rural	Biomass	1996	210836	374595	567861
Afr	Rural	Biomass	1997	343320	365124	378097
Amr	Rural	Biomass	1997	64324.2	73242.1	82349.1
Emr	Rural	Biomass	1997	117027	128489	138621
Eur	Rural	Biomass	1997	21415	27899.7	39205.4
Sear	Rural	Biomass	1997	876086	926166	964710
Wpr	Rural	Biomass	1997	212147	375356	562308
Afr	Rural	Biomass	1998	353973	373405	386693
Amr	Rural	Biomass	1998	62884.9	71913.4	81397.3
Emr	Rural	Biomass	1998	119702	130843	140067
Eur	Rural	Biomass	1998	20789.6	27454.4	38355.2
Sear	Rural	Biomass	1998	880685	935172	972970
Wpr	Rural	Biomass	1998	225373	380715	547947
Afr	Rural	Biomass	1999	364195	382402	393645
Amr	Rural	Biomass	1999	62268.9	70669.5	79595.4
Emr	Rural	Biomass	1999	121343	133337	141782
Eur	Rural	Biomass	1999	21094.7	26904.5	37302.8
Sear	Rural	Biomass	1999	885588	941324	983298
Wpr	Rural	Biomass	1999	243235	388682	551377
Afr	Rural	Biomass	2000	374643	390617	401765
Amr	Rural	Biomass	2000	60775	68947.4	78241.1
Emr	Rural	Biomass	2000	124849	135296	144099
Eur	Rural	Biomass	2000	20596.3	26418.3	35654.8
Sear	Rural	Biomass	2000	894270	948855	994970
Wpr	Rural	Biomass	2000	243476	392491	538906
Afr	Rural	Biomass	2001	384021	398597	409260
Amr	Rural	Biomass	2001	59995.8	67906	76487.8
Emr	Rural	Biomass	2001	128187	137618	145941
Eur	Rural	Biomass	2001	20549.3	25686.2	35824.2
Sear	Rural	Biomass	2001	897997	956513	1.00082e+06
Wpr	Rural	Biomass	2001	257732	401536	540620
Afr	Rural	Biomass	2002	392362	406733	417124
Amr	Rural	Biomass	2002	58174.9	66241.7	74935.1
Emr	Rural	Biomass	2002	129215	139911	148282
Eur	Rural	Biomass	2002	20164.2	24954.9	34043.7
Sear	Rural	Biomass	2002	900489	964151	1.01015e+06
Wpr	Rural	Biomass	2002	262873	405349	548783
Afr	Rural	Biomass	2003	402053	414779	424791
Amr	Rural	Biomass	2003	56453.3	65064.9	73556.3
Emr	Rural	Biomass	2003	130973	142004	150620
Eur	Rural	Biomass	2003	19888.3	24611.8	34344.9
Sear	Rural	Biomass	2003	907829	969205	1.01708e+06
Wpr	Rural	Biomass	2003	267296	407595	555616
Afr	Rural	Biomass	2004	410292	422775	432230
Amr	Rural	Biomass	2004	56273	63822.9	71734.5
Emr	Rural	Biomass	2004	133199	144009	152935
Eur	Rural	Biomass	2004	19001.3	24371.4	33749.9
Sear	Rural	Biomass	2004	915064	974864	1.02182e+06
Wpr	Rural	Biomass	2004	284163	413422	550901
Afr	Rural	Biomass	2005	418343	430924	440835
Amr	Rural	Biomass	2005	54939.5	62515.9	70183.9
Emr	Rural	Biomass	2005	135128	145779	153855
Eur	Rural	Biomass	2005	18599.8	23592.5	33934.1
Sear	Rural	Biomass	2005	919479	980312	1.02278e+06
Wpr	Rural	Biomass	2005	288502	424001	550039
Afr	Rural	Biomass	2006	426158	439421	448883
Amr	Rural	Biomass	2006	54158.5	60919.9	68705.6
Emr	Rural	Biomass	2006	135253	146768	155619
Eur	Rural	Biomass	2006	18528	23475.5	33450.3
Sear	Rural	Biomass	2006	914731	982582	1.03403e+06
Wpr	Rural	Biomass	2006	296624	432435	570891
Afr	Rural	Biomass	2007	434174	447287	457213
Amr	Rural	Biomass	2007	53071	60135.3	67574.9
Emr	Rural	Biomass	2007	136185	147944	157282
Eur	Rural	Biomass	2007	17840.2	23264.2	33293.6
Sear	Rural	Biomass	2007	917109	982326	1.0301e+06
Wpr	Rural	Biomass	2007	293951	436659	562285
Afr	Rural	Biomass	2008	442180	455984	465860
Amr	Rural	Biomass	2008	52631.6	58658.1	65368.9
Emr	Rural	Biomass	2008	137020	148847	158976
Eur	Rural	Biomass	2008	17757.6	23361.4	34999.7
Sear	Rural	Biomass	2008	916405	982390	1.03622e+06
Wpr	Rural	Biomass	2008	291673	446045	570195
Afr	Rural	Biomass	2009	451181	464611	474830
Amr	Rural	Biomass	2009	51256.1	57643.6	64469.9
Emr	Rural	Biomass	2009	134330	148956	160034
Eur	Rural	Biomass	2009	17789.1	23353.1	35774.7
Sear	Rural	Biomass	2009	914798	981078	1.03598e+06
Wpr	Rural	Biomass	2009	295564	449196	573224
Afr	Rural	Biomass	2010	457796	472587	482148
Amr	Rural	Biomass	2010	50122.3	56180.6	64095.8
Emr	Rural	Biomass	2010	136324	149356	159722
Eur	Rural	Biomass	2010	17441.6	23640	36919.6
Sear	Rural	Biomass	2010	902951	975122	1.03323e+06
Wpr	Rural	Biomass	2010	309370	448432	580317
Afr	Rural	Biomass	2011	467156	481233	491381
Amr	Rural	Biomass	2011	49814.5	55119.5	61702.1
Emr	Rural	Biomass	2011	132920	149227	161407
Eur	Rural	Biomass	2011	17059.1	23868.7	36337.3
Sear	Rural	Biomass	2011	891213	967691	1.02933e+06
Wpr	Rural	Biomass	2011	299098	444816	580024
Afr	Rural	Biomass	2012	475401	489655	500998
Amr	Rural	Biomass	2012	47821.2	53705.7	59889
Emr	Rural	Biomass	2012	133627	149405	161748
Eur	Rural	Biomass	2012	17202.1	24154.2	42034.2
Sear	Rural	Biomass	2012	884064	958986	1.02287e+06
Wpr	Rural	Biomass	2012	290988	448564	579872
Afr	Rural	Biomass	2013	481541	498882	509314
Amr	Rural	Biomass	2013	46535.5	52398.5	59130.4
Emr	Rural	Biomass	2013	133346	149676	162075
Eur	Rural	Biomass	2013	17147.8	24408.9	43689.4
Sear	Rural	Biomass	2013	868077	944336	1.01502e+06
Wpr	Rural	Biomass	2013	283000	441213	578532
Afr	Rural	Biomass	2014	490829	506794	518772
Amr	Rural	Biomass	2014	45839.9	51072.5	57658.9
Emr	Rural	Biomass	2014	130835	148480	163653
Eur	Rural	Biomass	2014	16815.7	25111.8	43121.1
Sear	Rural	Biomass	2014	842977	927532	1.00348e+06
Wpr	Rural	Biomass	2014	268739	433199	583358
Afr	Rural	Biomass	2015	498995	515217	527000
Amr	Rural	Biomass	2015	44034.8	49590.3	56125.4
Emr	Rural	Biomass	2015	131057	148407	163154
Eur	Rural	Biomass	2015	16671.8	25956.6	45978
Sear	Rural	Biomass	2015	812246	905361	992388
Wpr	Rural	Biomass	2015	244651	424063	579223
Afr	Rural	Biomass	2016	505718	523335	536797
Amr	Rural	Biomass	2016	42475	47898	54995.7
Emr	Rural	Biomass	2016	126300	146499	163564
Eur	Rural	Biomass	2016	16299.4	26037.2	47783.6
Sear	Rural	Biomass	2016	775702	881991	981988
Wpr	Rural	Biomass	2016	226542	416310	574320
Afr	Rural	Biomass	2017	512763	531398	545962
Amr	Rural	Biomass	2017	40653.1	46299.4	53421.5
Emr	Rural	Biomass	2017	125629	144970	163289
Eur	Rural	Biomass	2017	16741.1	26946.9	49110.5
Sear	Rural	Biomass	2017	735109	860397	978628
Wpr	Rural	Biomass	2017	204202	404027	566996
Afr	Rural	Biomass	2018	517599	538973	552999
Amr	Rural	Biomass	2018	39004.6	45236.3	52259
Emr	Rural	Biomass	2018	119991	143234	162826
Eur	Rural	Biomass	2018	17111.2	27721.1	52331.9
Sear	Rural	Biomass	2018	682239	830677	974303
Wpr	Rural	Biomass	2018	187040	392657	570686
Afr	Rural	Biomass	2019	520785	545945	562703
Amr	Rural	Biomass	2019	37460	43745.9	51415.1
Emr	Rural	Biomass	2019	116325	140551	162770
Eur	Rural	Biomass	2019	16295.3	28160.1	53392.3
Sear	Rural	Biomass	2019	622619	803462	963780
Wpr	Rural	Biomass	2019	157878	379751	561261
Afr	Rural	Biomass	2020	527440	552597	571526
Amr	Rural	Biomass	2020	36245.3	42333.8	49921.2
Emr	Rural	Biomass	2020	109269	137828	163266
Eur	Rural	Biomass	2020	16585.1	28682.3	55494.3
Sear	Rural	Biomass	2020	556126	768083	950817
Wpr	Rural	Biomass	2020	139539	367457	566783
Afr	Rural	Biomass	2021	529227	558578	577647
Amr	Rural	Biomass	2021	34411.9	41007.5	49603
Emr	Rural	Biomass	2021	103424	134289	161915
Eur	Rural	Biomass	2021	16245	29170.7	55865.8
Sear	Rural	Biomass	2021	520195	741120	947998
Wpr	Rural	Biomass	2021	128335	356238	557617
Afr	Rural	Biomass	2022	531859	563380	585581
Amr	Rural	Biomass	2022	32436.9	39651.9	48306.6
Emr	Rural	Biomass	2022	95578	130847	160679
Eur	Rural	Biomass	2022	16047.6	29625.3	57395.4
Sear	Rural	Biomass	2022	456515	704596	933601
Wpr	Rural	Biomass	2022	117841	345903	552499
Afr	Rural	Biomass	2023	533892	566559	590548
Amr	Rural	Biomass	2023	30624.1	38347.5	48205.1
Emr	Rural	Biomass	2023	90685.3	127392	162269
Eur	Rural	Biomass	2023	16044.8	30268.7	59116.3
Sear	Rural	Biomass	2023	387686	674064	928823
Wpr	Rural	Biomass	2023	106916	326175	541434
Afr	Rural	Biomass	2024	531874	571204	597771
Amr	Rural	Biomass	2024	29260.5	37162.8	47819.2
Emr	Rural	Biomass	2024	81881.8	123706	160084
Eur	Rural	Biomass	2024	15654.5	30726.3	59604.8
Sear	Rural	Biomass	2024	361182	642292	928831
Wpr	Rural	Biomass	2024	94018.8	320998	534130
Afr	Rural	Biomass	2025	530029	573216	605178
Amr	Rural	Biomass	2025	27725.4	36095	46326.8
Emr	Rural	Biomass	2025	72063.7	118926	158841
Eur	Rural	Biomass	2025	14896.1	31578.6	62172.9
Sear	Rural	Biomass	2025	301611	602061	915218
Wpr	Rural	Biomass	2025	83400.9	296791	526531
Afr	Rural	Biomass	2026	528156	576650	607862
Amr	Rural	Biomass	2026	26544.3	35145.5	46117.1
Emr	Rural	Biomass	2026	69244.2	113637	156473
Eur	Rural	Biomass	2026	15152	31715.8	60567.7
Sear	Rural	Biomass	2026	276394	570493	915952
Wpr	Rural	Biomass	2026	74912.5	283350	515958
Afr	Rural	Biomass	2027	522904	576215	615278
Amr	Rural	Biomass	2027	25333.9	34543.5	45167.1
Emr	Rural	Biomass	2027	58849.4	110342	156276
Eur	Rural	Biomass	2027	14959.4	32364.6	61397
Sear	Rural	Biomass	2027	238508	536560	909271
Wpr	Rural	Biomass	2027	73290.3	274606	502132
Afr	Rural	Biomass	2028	520005	578170	620189
Amr	Rural	Biomass	2028	24246.4	33233.1	44931
Emr	Rural	Biomass	2028	54082.2	104890	151386
Eur	Rural	Biomass	2028	14283.4	32103.9	61389
Sear	Rural	Biomass	2028	204110	503929	904233
Wpr	Rural	Biomass	2028	67687	263110	499453
Afr	Rural	Biomass	2029	514446	578670	623320
Amr	Rural	Biomass	2029	22510.9	32074.7	43667.3
Emr	Rural	Biomass	2029	47807.8	99765.4	153878
Eur	Rural	Biomass	2029	14482.2	32043.8	62781.3
Sear	Rural	Biomass	2029	178101	471139	886447
Wpr	Rural	Biomass	2029	61988.9	256541	483966
Afr	Rural	Biomass	2030	502868	578345	628155
Amr	Rural	Biomass	2030	21989.5	31124.3	44307.4
Emr	Rural	Biomass	2030	41591.5	94048.9	147779
Eur	Rural	Biomass	2030	14282	32658.1	63410.2
Sear	Rural	Biomass	2030	164418	440543	881709
Wpr	Rural	Biomass	2030	58660.4	239822	480702
Afr	Rural	Charcoal	1990	7836.2	16253.5	33158.4
Amr	Rural	Charcoal	1990	439.474	1839.5	5963.1
Emr	Rural	Charcoal	1990	329.135	2189.05	7537.33
Eur	Rural	Charcoal	1990	168.136	821.168	3238.57
Sear	Rural	Charcoal	1990	11510.8	21031.5	39953.4
Wpr	Rural	Charcoal	1990	779.957	3297.26	13836.9
Afr	Rural	Charcoal	1991	7927.4	16392.5	32949
Amr	Rural	Charcoal	1991	473.203	1929.18	5440.31
Emr	Rural	Charcoal	1991	342.86	2059.88	6957.89
Eur	Rural	Charcoal	1991	167.97	786.811	3123.54
Sear	Rural	Charcoal	1991	10794.1	20158.6	39084
Wpr	Rural	Charcoal	1991	972.661	3573.23	13223.1
Afr	Rural	Charcoal	1992	8308.09	16531	33296.9
Amr	Rural	Charcoal	1992	519.917	1838.77	5295.28
Emr	Rural	Charcoal	1992	310.327	1912.52	6267.57
Eur	Rural	Charcoal	1992	179.272	736.437	2465.25
Sear	Rural	Charcoal	1992	11341.8	19730.4	37033.4
Wpr	Rural	Charcoal	1992	1032.66	4025.17	16067.4
Afr	Rural	Charcoal	1993	8401.53	16693.9	33401.4
Amr	Rural	Charcoal	1993	592.399	1802.88	5031.04
Emr	Rural	Charcoal	1993	337.57	1822.23	6594.2
Eur	Rural	Charcoal	1993	170.199	687.964	2323.65
Sear	Rural	Charcoal	1993	10322.4	19174.4	38099.5
Wpr	Rural	Charcoal	1993	1047.3	4487.33	12793.7
Afr	Rural	Charcoal	1994	8926.16	17125.9	32600.1
Amr	Rural	Charcoal	1994	590.164	1726.42	4882.27
Emr	Rural	Charcoal	1994	357.153	1754.33	5515.57
Eur	Rural	Charcoal	1994	138.07	631.474	2173.38
Sear	Rural	Charcoal	1994	10030.5	18483.8	34083.9
Wpr	Rural	Charcoal	1994	1260.33	4601.99	13416.2
Afr	Rural	Charcoal	1995	9013.01	16755.3	33177.4
Amr	Rural	Charcoal	1995	676.899	1750.78	4947.79
Emr	Rural	Charcoal	1995	328.019	1702.31	5208.93
Eur	Rural	Charcoal	1995	140.094	583.939	1799.71
Sear	Rural	Charcoal	1995	9285.85	18197.7	32088.4
Wpr	Rural	Charcoal	1995	1404.7	5133.67	13258.9
Afr	Rural	Charcoal	1996	10007.7	17088	32006.7
Amr	Rural	Charcoal	1996	769.099	1793.15	4917.37
Emr	Rural	Charcoal	1996	333.885	1644.36	5327.81
Eur	Rural	Charcoal	1996	155.066	556.994	1811.36
Sear	Rural	Charcoal	1996	9415.51	17951.8	31281.9
Wpr	Rural	Charcoal	1996	1446.33	5560.04	15300.7
Afr	Rural	Charcoal	1997	10287.7	17486.4	31520.6
Amr	Rural	Charcoal	1997	816.547	1849.02	4845.37
Emr	Rural	Charcoal	1997	376.625	1564.39	5228.47
Eur	Rural	Charcoal	1997	143.281	531.66	1653.76
Sear	Rural	Charcoal	1997	9148.22	17252	29462.3
Wpr	Rural	Charcoal	1997	1508.66	5833.72	14632.5
Afr	Rural	Charcoal	1998	10722.9	17470.6	30778.2
Amr	Rural	Charcoal	1998	810.726	1866.4	4695.77
Emr	Rural	Charcoal	1998	399.904	1640.96	5555.1
Eur	Rural	Charcoal	1998	143.823	526.823	1465.34
Sear	Rural	Charcoal	1998	9110.32	17012.6	28783.1
Wpr	Rural	Charcoal	1998	1690.43	5893.59	15916.4
Afr	Rural	Charcoal	1999	11431.8	17869.6	29922.8
Amr	Rural	Charcoal	1999	923.955	1902.91	4591.01
Emr	Rural	Charcoal	1999	437.561	1626.37	5285.93
Eur	Rural	Charcoal	1999	154.378	496.245	1445.6
Sear	Rural	Charcoal	1999	8924.31	16592.8	28351.3
Wpr	Rural	Charcoal	1999	1873.37	5901.61	15665.4
Afr	Rural	Charcoal	2000	12014.3	18455.5	30091.3
Amr	Rural	Charcoal	2000	997.433	1962.24	4914.43
Emr	Rural	Charcoal	2000	419.132	1613.27	5039.98
Eur	Rural	Charcoal	2000	146.325	484.439	1336.1
Sear	Rural	Charcoal	2000	8897.69	16154.8	27114.8
Wpr	Rural	Charcoal	2000	2158.76	6281.1	16449.4
Afr	Rural	Charcoal	2001	12362.2	18685	29367.6
Amr	Rural	Charcoal	2001	1029.27	2047.17	5195.96
Emr	Rural	Charcoal	2001	538.302	1726.11	5041.55
Eur	Rural	Charcoal	2001	143.876	450.091	1200.87
Sear	Rural	Charcoal	2001	8890.45	15852	27315.7
Wpr	Rural	Charcoal	2001	2261.16	6212.68	16081.7
Afr	Rural	Charcoal	2002	13330.5	19596.9	29437.2
Amr	Rural	Charcoal	2002	1105.34	2197	5770.35
Emr	Rural	Charcoal	2002	581.106	1819.55	5346.21
Eur	Rural	Charcoal	2002	154.993	434.457	1088.95
Sear	Rural	Charcoal	2002	8410.64	15343	25350.5
Wpr	Rural	Charcoal	2002	2409.31	6444.46	16319.5
Afr	Rural	Charcoal	2003	14141.2	19847.6	29280.5
Amr	Rural	Charcoal	2003	1070.57	2219.11	5488.82
Emr	Rural	Charcoal	2003	600.523	1938.66	5671.07
Eur	Rural	Charcoal	2003	172.875	430.733	1112.14
Sear	Rural	Charcoal	2003	8394.25	15409.3	25214.4
Wpr	Rural	Charcoal	2003	2663.96	6764.04	18887
Afr	Rural	Charcoal	2004	14722.2	20749.2	29432.4
Amr	Rural	Charcoal	2004	1124.82	2326.04	6042.97
Emr	Rural	Charcoal	2004	720.633	2213.59	6986.55
Eur	Rural	Charcoal	2004	163.209	413.587	1029.54
Sear	Rural	Charcoal	2004	8832.47	15209.2	24739.7
Wpr	Rural	Charcoal	2004	3044.15	7125.5	15441.1
Afr	Rural	Charcoal	2005	15857.3	21266.9	29034.4
Amr	Rural	Charcoal	2005	1214.12	2558.76	6203.61
Emr	Rural	Charcoal	2005	938.51	2368.12	7171.55
Eur	Rural	Charcoal	2005	142.409	385.065	880.518
Sear	Rural	Charcoal	2005	8031.11	14853.2	23603.5
Wpr	Rural	Charcoal	2005	3286.06	7236.04	15502.4
Afr	Rural	Charcoal	2006	16268	22023.6	31462.8
Amr	Rural	Charcoal	2006	1233.1	2569.96	5879.55
Emr	Rural	Charcoal	2006	949.983	2817.42	8215.39
Eur	Rural	Charcoal	2006	158.704	355.444	829.741
Sear	Rural	Charcoal	2006	8682.49	14627.8	23560.3
Wpr	Rural	Charcoal	2006	3518.97	7530.92	16055.5
Afr	Rural	Charcoal	2007	17359.1	23067.9	32088.1
Amr	Rural	Charcoal	2007	1339.39	2676.08	6593.64
Emr	Rural	Charcoal	2007	1245.98	3319.67	9448.84
Eur	Rural	Charcoal	2007	132.692	323.971	883.621
Sear	Rural	Charcoal	2007	8151.69	14191.2	23422.3
Wpr	Rural	Charcoal	2007	3986	8105.58	15740.9
Afr	Rural	Charcoal	2008	18162.1	24223.1	32637.7
Amr	Rural	Charcoal	2008	1373.34	2843.97	6119.87
Emr	Rural	Charcoal	2008	1399.91	3720.85	9349.19
Eur	Rural	Charcoal	2008	111.104	288.794	707.398
Sear	Rural	Charcoal	2008	8240.62	14254.1	22727.3
Wpr	Rural	Charcoal	2008	4143.8	8341.54	15772.8
Afr	Rural	Charcoal	2009	18952.6	25072.6	34599.7
Amr	Rural	Charcoal	2009	1414.3	2879.13	6217.38
Emr	Rural	Charcoal	2009	1790.99	4563.89	12032.6
Eur	Rural	Charcoal	2009	98.8345	254.397	738.317
Sear	Rural	Charcoal	2009	7945.72	13672.4	22585.4
Wpr	Rural	Charcoal	2009	4660.04	8789.35	14815.6
Afr	Rural	Charcoal	2010	20175.9	26424.2	36490.3
Amr	Rural	Charcoal	2010	1491.6	2979.94	6212.41
Emr	Rural	Charcoal	2010	2162.48	5171.55	12662
Eur	Rural	Charcoal	2010	84.8767	244.788	719.473
Sear	Rural	Charcoal	2010	7163.98	13403.2	21619.4
Wpr	Rural	Charcoal	2010	4208.82	9228.08	16316.5
Afr	Rural	Charcoal	2011	21396.8	27816.2	37702.7
Amr	Rural	Charcoal	2011	1506.14	3091.19	6129.59
Emr	Rural	Charcoal	2011	2552.67	5900.86	13403.4
Eur	Rural	Charcoal	2011	73.68	210.854	718.704
Sear	Rural	Charcoal	2011	7553.92	13094.8	22257.4
Wpr	Rural	Charcoal	2011	4927.45	9161.61	16074.5
Afr	Rural	Charcoal	2012	22136.2	28879.4	39577.1
Amr	Rural	Charcoal	2012	1666.04	3207.08	6600.52
Emr	Rural	Charcoal	2012	2786.3	6675.36	14753.4
Eur	Rural	Charcoal	2012	68.2424	193.992	707.678
Sear	Rural	Charcoal	2012	7199.53	12441.4	21050.5
Wpr	Rural	Charcoal	2012	5163.17	9265.08	15099.1
Afr	Rural	Charcoal	2013	22991.6	30513.9	41840.9
Amr	Rural	Charcoal	2013	1611.37	3257.29	6297.22
Emr	Rural	Charcoal	2013	3181.83	7577.27	15989.5
Eur	Rural	Charcoal	2013	57.1942	187.097	732.614
Sear	Rural	Charcoal	2013	6462.43	11764	20185.2
Wpr	Rural	Charcoal	2013	4778.4	9317.53	16487
Afr	Rural	Charcoal	2014	24189.8	32379.4	43965.6
Amr	Rural	Charcoal	2014	1646.39	3281.41	6370.82
Emr	Rural	Charcoal	2014	3831.92	8651.2	17163.6
Eur	Rural	Charcoal	2014	51.9771	175.587	793.224
Sear	Rural	Charcoal	2014	6331.32	11326.7	20315
Wpr	Rural	Charcoal	2014	4839.22	9251.31	16065.7
Afr	Rural	Charcoal	2015	25800.8	34235.3	46656.6
Amr	Rural	Charcoal	2015	1601.42	3346.34	6862.75
Emr	Rural	Charcoal	2015	4146.41	9421.28	18744.1
Eur	Rural	Charcoal	2015	40.8201	172.892	796.627
Sear	Rural	Charcoal	2015	5959.17	11004.4	21170
Wpr	Rural	Charcoal	2015	4928.39	9132.53	15696.5
Afr	Rural	Charcoal	2016	26688	36295.8	50249.6
Amr	Rural	Charcoal	2016	1520.95	3356.37	6937.24
Emr	Rural	Charcoal	2016	4662.19	10710.6	21585
Eur	Rural	Charcoal	2016	41.0596	165.54	900.986
Sear	Rural	Charcoal	2016	5096.98	10530.2	21043.6
Wpr	Rural	Charcoal	2016	4728.89	8943.71	15774.8
Afr	Rural	Charcoal	2017	28895.7	38465.9	52005.9
Amr	Rural	Charcoal	2017	1618.89	3423.81	6982.22
Emr	Rural	Charcoal	2017	5646.65	11946.2	22658.3
Eur	Rural	Charcoal	2017	34.377	164.999	864.296
Sear	Rural	Charcoal	2017	4781.42	10045.4	21573.7
Wpr	Rural	Charcoal	2017	4369.49	8773.11	15045.3
Afr	Rural	Charcoal	2018	29617.4	40791	56464.9
Amr	Rural	Charcoal	2018	1675.35	3512.87	7363.73
Emr	Rural	Charcoal	2018	5290.43	12736.4	24134.3
Eur	Rural	Charcoal	2018	32.5454	163.03	1022.39
Sear	Rural	Charcoal	2018	4013.78	9409.39	21919.1
Wpr	Rural	Charcoal	2018	4273.67	8376.71	15094.4
Afr	Rural	Charcoal	2019	31863.9	44572.2	62760.8
Amr	Rural	Charcoal	2019	1561.11	3591.16	7901.58
Emr	Rural	Charcoal	2019	5962.16	13949.5	26419.3
Eur	Rural	Charcoal	2019	30.9708	158.42	1290.53
Sear	Rural	Charcoal	2019	3635.43	9073.09	21056.3
Wpr	Rural	Charcoal	2019	3736.92	8211.51	15655.5
Afr	Rural	Charcoal	2020	33407.9	47370.4	65865.6
Amr	Rural	Charcoal	2020	1554.06	3609.17	8265.28
Emr	Rural	Charcoal	2020	6289.72	14552.7	28960
Eur	Rural	Charcoal	2020	32.5518	172.96	1511.95
Sear	Rural	Charcoal	2020	3304.98	8669.12	22089.9
Wpr	Rural	Charcoal	2020	3733.55	7992.26	15929.7
Afr	Rural	Charcoal	2021	35634	50506.1	73213
Amr	Rural	Charcoal	2021	1561.66	3691.47	9012.2
Emr	Rural	Charcoal	2021	6956.86	16059.7	31238.5
Eur	Rural	Charcoal	2021	28.6741	170.604	1495.07
Sear	Rural	Charcoal	2021	2993.81	8301.5	25208.7
Wpr	Rural	Charcoal	2021	3552.29	7903.85	15779.4
Afr	Rural	Charcoal	2022	36915.7	55045.3	82063.6
Amr	Rural	Charcoal	2022	1442.74	3723.06	8564.16
Emr	Rural	Charcoal	2022	6612.14	16910.6	35017.2
Eur	Rural	Charcoal	2022	30.0419	180.854	1632.69
Sear	Rural	Charcoal	2022	2589.97	8148.2	24274.3
Wpr	Rural	Charcoal	2022	3429.2	7571.91	16797.3
Afr	Rural	Charcoal	2023	40202.2	59175.3	85708.4
Amr	Rural	Charcoal	2023	1354.9	3749.24	9508.91
Emr	Rural	Charcoal	2023	7035.54	17648.7	36520.7
Eur	Rural	Charcoal	2023	22.6928	182.438	1896.62
Sear	Rural	Charcoal	2023	2323.76	7701	24909.2
Wpr	Rural	Charcoal	2023	3244.95	7640.77	17230.5
Afr	Rural	Charcoal	2024	41558.3	63751.9	93876.1
Amr	Rural	Charcoal	2024	1449.49	3827.96	10424.5
Emr	Rural	Charcoal	2024	6705.36	18400.7	39684.9
Eur	Rural	Charcoal	2024	23.847	188.248	2323.89
Sear	Rural	Charcoal	2024	1877.8	7421.38	28218.4
Wpr	Rural	Charcoal	2024	3174.21	7601	17776.8
Afr	Rural	Charcoal	2025	44905.8	68560.4	102215
Amr	Rural	Charcoal	2025	1446.71	3850.31	10147.5
Emr	Rural	Charcoal	2025	7482.01	19439	41919.9
Eur	Rural	Charcoal	2025	21.7524	187.761	2947.92
Sear	Rural	Charcoal	2025	1664.97	7082.98	28651.7
Wpr	Rural	Charcoal	2025	2750.3	7386.1	19193.8
Afr	Rural	Charcoal	2026	47552.1	73800	111674
Amr	Rural	Charcoal	2026	1269.82	3910.3	11766.6
Emr	Rural	Charcoal	2026	7344.19	19770.2	47470.2
Eur	Rural	Charcoal	2026	20.0078	210.203	2888.66
Sear	Rural	Charcoal	2026	1460.44	6974.59	30010.4
Wpr	Rural	Charcoal	2026	3026.79	7161.96	19163.8
Afr	Rural	Charcoal	2027	49880.2	79471.9	121793
Amr	Rural	Charcoal	2027	1278.16	3993.09	10919.8
Emr	Rural	Charcoal	2027	6799.4	20550.8	49742.7
Eur	Rural	Charcoal	2027	21.5417	210.728	3693.24
Sear	Rural	Charcoal	2027	1311.16	6734.5	35454.3
Wpr	Rural	Charcoal	2027	2605.64	7122.05	19357.3
Afr	Rural	Charcoal	2028	52108	85534.6	131087
Amr	Rural	Charcoal	2028	1298.61	3958.02	12280.5
Emr	Rural	Charcoal	2028	7603.31	21069.4	52479.2
Eur	Rural	Charcoal	2028	22.6743	215.666	3820.06
Sear	Rural	Charcoal	2028	1111.13	6430.12	36931.2
Wpr	Rural	Charcoal	2028	2284.23	6832.95	20654.8
Afr	Rural	Charcoal	2029	54104.6	90782.9	142804
Amr	Rural	Charcoal	2029	1307.14	4062.27	12461.5
Emr	Rural	Charcoal	2029	7449.28	20985.6	53308.3
Eur	Rural	Charcoal	2029	22.2686	218.732	4191.96
Sear	Rural	Charcoal	2029	937.775	6332.69	39200.1
Wpr	Rural	Charcoal	2029	2344.77	6933.79	20906.7
Afr	Rural	Charcoal	2030	58875.5	98087.5	154995
Amr	Rural	Charcoal	2030	1248.43	4035.6	13361.2
Emr	Rural	Charcoal	2030	7576.72	21039.9	58156.9
Eur	Rural	Charcoal	2030	20.8793	252.979	5289.27
Sear	Rural	Charcoal	2030	934.225	6201.39	41524.5
Wpr	Rural	Charcoal	2030	2232.71	6873.94	20587.5
Afr	Rural	Coal	1990	461.242	1935.19	9370.64
Amr	Rural	Coal	1990	210.943	1041.23	2091.12
Emr	Rural	Coal	1990	8.0145	241.769	2565.43
Eur	Rural	Coal	1990	2349.07	5938.39	13550.8
Sear	Rural	Coal	1990	2255.02	14203.5	38262.7
Wpr	Rural	Coal	1990	52057.6	294393	637134
Afr	Rural	Coal	1991	425.593	1871.13	7621.42
Amr	Rural	Coal	1991	168.438	1002.49	1952.28
Emr	Rural	Coal	1991	7.59628	211.792	2262.9
Eur	Rural	Coal	1991	2253.34	5871.12	12127
Sear	Rural	Coal	1991	2433.55	14405.5	39133.9
Wpr	Rural	Coal	1991	64315.9	298273	630394
Afr	Rural	Coal	1992	426.718	1818.3	7100.88
Amr	Rural	Coal	1992	181.885	880.356	1748.22
Emr	Rural	Coal	1992	7.16925	198.848	2084.82
Eur	Rural	Coal	1992	2546.3	5702.79	11942.9
Sear	Rural	Coal	1992	2688.04	14772	39462
Wpr	Rural	Coal	1992	78522.1	312444	593602
Afr	Rural	Coal	1993	478.306	1766.37	6173.03
Amr	Rural	Coal	1993	127.772	819.021	1687.51
Emr	Rural	Coal	1993	8.11815	200.143	1712.81
Eur	Rural	Coal	1993	2347.92	5630.33	11221
Sear	Rural	Coal	1993	2579.93	14273.6	34659.8
Wpr	Rural	Coal	1993	98362.5	318273	593981
Afr	Rural	Coal	1994	447.809	1650.12	5363.06
Amr	Rural	Coal	1994	134.799	721.713	1413.15
Emr	Rural	Coal	1994	9.12741	184.441	1485.85
Eur	Rural	Coal	1994	2518.78	5369.61	10380.9
Sear	Rural	Coal	1994	2834.67	13652.6	35597.8
Wpr	Rural	Coal	1994	104393	319728	578098
Afr	Rural	Coal	1995	413.977	1608.69	5166.94
[truncated: 2,429 more rows]
