# Supplementary material for: What fuels the fire? Cooking fuel estimates at global, regional and country level for 1990-2030
Source: Research Square preprint supplement (doi:10.21203/rs.3.rs-251806/v1), 2021-02-17
Supplement: Supplementary file 3 [file eb8dafe541a7a09c8be7db3d.pdf]

Table 1: Sources of survey data contained within the WHO Household Energy Database as of March 2020.

| Data source                                                                                     | Entity conducting survey                                   | Typical survey question                                       | Number of countries |               | Number of surveys |               |
|-------------------------------------------------------------------------------------------------|------------------------------------------------------------|---------------------------------------------------------------|---------------------|---------------|-------------------|---------------|
|                                                                                                 |                                                            |                                                               | In database         | Used in model | In database       | Used in model |
| <b>National Living Standards or Other Surveys</b>                                               |                                                            | Major fuel used for cooking                                   | 105                 | 97            | 584               | 478           |
| <b>Demographic and Health Survey (DHS)</b>                                                      | Funded by USAID; implemented by ICF International          | What type of fuel does your household mainly use for cooking? | 80                  | 79            | 233               | 224           |
| <b>Census</b>                                                                                   | National statistical agencies                              | What is the main source of cooking fuel in your household?    | 108                 | 96            | 245               | 185           |
| <b>Multi-indicator cluster survey (MICS)</b>                                                    | UNICEF                                                     | What type of fuel does your household mainly use for cooking? | 82                  | 79            | 147               | 142           |
| <b>World Health Survey</b>                                                                      | WHO                                                        | What type of fuel does your household mainly use for cooking? | 49                  | 44            | 49                | 44            |
| <b>Living Standard Measurement Survey, income expenditure survey, or other national surveys</b> | National statistical agencies, supported by the World Bank | Which is the main source of energy for cooking?               | 45                  | 35            | 89                | 58            |
| <b>Survey on global AGEING (SAGE)</b>                                                           | WHO                                                        | What is your main source of energy for cooking?               | 6                   | 5             | 6                 | 5             |
| <b>Total</b>                                                                                    |                                                            |                                                               |                     |               | 1353              | 1136          |
